# Supplementary material for: Comparative Ubiquitination Proteomics Revealed the Salt Tolerance Mechanism in Sugar Beet Monomeric Additional Line M14
Source: MDPI journal article supplement (doi:10.3390/ijms232416088), 2022-12-17
Supplement: s1 [file s1]

Supplementary Table S3 Proteins with more than 10 ubiquitination sites in NaCl treatment

| Accession <sup>a</sup> | Uniport <sup>b</sup> | Protein name <sup>c</sup>                                               | Ubiquitinated site         | Ubiquitinated site         |
|------------------------|----------------------|-------------------------------------------------------------------------|----------------------------|----------------------------|
|                        |                      |                                                                         | number with 200<br>mM NaCl | number with 400<br>mM NaCl |
| 731345323              | Q9SJQ9               | Fructose-bisphosphate aldolase 6                                        | 10                         | 10                         |
| 731351891              | F4K5S5               | Polyketide cyclase/dehydrase and lipid transport<br>superfamily protein | 10                         | -                          |
| 731311848              | P53492               | Actin-7                                                                 | 12                         | 10                         |
| 731354199              | P19456               | ATPase 2                                                                | 15                         | -                          |
| 731351877              | Q9LZF6               | Cell division control protein 48 homolog E                              | 16                         | -                          |
| 731368198              | Q9SHE7               | Ubiquitin-NEDD8-like protein RUB1                                       | 27                         | 27                         |
| 731349098              | O23629               | Histone H2B.6                                                           | -                          | 12                         |

<sup>a</sup> Protein sequence number in the NCBI database. <sup>b</sup> Uniport protein number.
