# Supplementary material for: Comparative Ubiquitination Proteomics Revealed the Salt Tolerance Mechanism in Sugar Beet Monomeric Additional Line M14
Source: MDPI journal article supplement (doi:10.3390/ijms232416088), 2022-12-17
Supplement: s1 [file s1]

Supplementary Table S9 Primer sequences required for the assay

| Primer name | Primer sequences            |
|-------------|-----------------------------|
| E1-1 F      | 5'-CAGGATGAACCCAGTGCAGT-3'  |
| E1-1 R      | 5'-TGCAGTGGACGTTGCAATTG-3'  |
| E1-2 F      | 5'-TTGTGACGGATGAGAAGGCC-3'  |
| E1-2 R      | 5'-AGTTCCTCGCCCTCATGTTG-3'  |
| E2-2 F      | 5'-GTCCTGATGACACCCCTTGG-3'  |
| E2-2 R      | 5'-ACATCCGTGCAGCTTCTGAA-3'  |
| E2-27 F     | 5'-CCTTTCGAGCCACCCTTGAT-3'  |
| E2-27 R     | 5'-TTGAGCAACGACAGCATCCT-3'  |
| E3-BRE1 F   | 5'-CGGCGTCACGTAAGCTCTAT-3'  |
| E3-BRE1 R   | 5'-AGCTTCTGGCAGAGCTTCTG-3'  |
| E3-CHIP F   | 5'-CATATTCCGCGACCCTGTCA-3'  |
| E3-CHIP R   | 5'-GAGTAAGTGGTTCCCGGGTG-3'  |
| E3-UPL5 F   | 5'-CGGTCTGTGATGGGTCTGAAA-3' |
| E3-UPL5 R   | 5'-TTTCAAAGGCCCAATGCTGC-3'  |
| 18S-F       | 5'-CCCCAATGGATCCTCGTTA-3'   |
| 18S-R       | 5'-TGACGGAGAATTAGGGTTCG-3'  |
