# Supplementary material for: Comparative Ubiquitination Proteomics Revealed the Salt Tolerance Mechanism in Sugar Beet Monomeric Additional Line M14
Source: MDPI journal article supplement (doi:10.3390/ijms232416088), 2022-12-17
Supplement: s1 [file s1]

Supplementary Table S6 List of GO enrichment entries

200 mM NaCl

|    |                                                                           |
|----|---------------------------------------------------------------------------|
| 1  | response to cadmium ion                                                   |
| 2  | response to metal ion                                                     |
| 3  | phenylpropanoid biosynthetic process                                      |
| 4  | response to water deprivation                                             |
| 5  | response to water                                                         |
| 6  | protein-containing complex disassembly                                    |
| 7  | proton transmembrane transport                                            |
| 8  | response to zinc ion                                                      |
| 9  | response to acid chemical                                                 |
| 10 | phenylpropanoid metabolic process                                         |
| 11 | translational elongation                                                  |
| 12 | actin filament bundle assembly                                            |
| 13 | actin filament bundle organization                                        |
| 14 | organelle membrane fusion                                                 |
| 15 | ion transmembrane transport                                               |
| 16 | inorganic cation transmembrane transport                                  |
| 17 | cation transmembrane transport                                            |
| 18 | nucleolus                                                                 |
| 19 | apoplast                                                                  |
| 20 | cytosolic ribosome                                                        |
| 21 | peroxisome                                                                |
| 22 | microbody                                                                 |
| 23 | proteasome complex                                                        |
| 24 | ribosome                                                                  |
| 25 | endopeptidase complex                                                     |
| 26 | cytosolic small ribosomal subunit                                         |
| 27 | endosome membrane                                                         |
| 28 | small ribosomal subunit                                                   |
| 29 | peptidase complex                                                         |
| 30 | endosome                                                                  |
| 31 | SNARE complex                                                             |
| 32 | proteasome regulatory particle, base subcomplex                           |
| 33 | late endosome membrane                                                    |
| 34 | ribosomal subunit                                                         |
| 35 | perinuclear region of cytoplasm                                           |
| 36 | transport vesicle                                                         |
| 37 | protein-containing complex binding                                        |
| 38 | GTPase activity                                                           |
| 39 | translation elongation factor activity                                    |
| 40 | pyrophosphate hydrolysis-driven proton transmembrane transporter activity |
| 41 | ion transmembrane transporter activity, phosphorylative mechanism         |

|    |                                                             |
|----|-------------------------------------------------------------|
| 42 | translation factor activity, RNA binding                    |
| 43 | proton-exporting ATPase activity, phosphorylative mechanism |
| 44 | ATPase-coupled cation transmembrane transporter activity    |
| 45 | translation regulator activity, nucleic acid binding        |
| 46 | amide binding                                               |
| 47 | translation regulator activity                              |
| 48 | polyubiquitin modification-dependent protein binding        |
| 49 | actin filament binding                                      |
| 50 | ATPase-coupled ion transmembrane transporter activity       |
| 51 | purine nucleoside binding                                   |
| 52 | GTP binding                                                 |
| 53 | guanyl nucleotide binding                                   |
| 54 | purine ribonucleoside binding                               |
| 55 | guanyl ribonucleotide binding                               |
| 56 | copper ion binding                                          |
| 57 | nucleoside binding                                          |
| 58 | ribonucleoside binding                                      |
| 59 | sulfur compound binding                                     |
| 60 | primary active transmembrane transporter activity           |
| 61 | active ion transmembrane transporter activity               |
| 62 | SNAP receptor activity                                      |

#### 400 mM NaCl

|    |                                                                               |
|----|-------------------------------------------------------------------------------|
| 1  | response to cadmium ion                                                       |
| 2  | response to metal ion                                                         |
| 3  | cellular response to unfolded protein                                         |
| 4  | response to unfolded protein                                                  |
| 5  | response to virus                                                             |
| 6  | cellular response to topologically incorrect protein                          |
| 7  | response to heat                                                              |
| 8  | protein folding                                                               |
| 9  | response to topologically incorrect protein                                   |
| 10 | water transport                                                               |
| 11 | fluid transport                                                               |
| 12 | immune effector process                                                       |
| 13 | alpha-amino acid metabolic process                                            |
| 14 | glutamine family amino acid biosynthetic process                              |
| 15 | protein refolding                                                             |
| 16 | cation transmembrane transport                                                |
| 17 | monovalent inorganic cation transport                                         |
| 18 | ion transmembrane transport                                                   |
| 19 | NADP metabolic process                                                        |
| 20 | L-phenylalanine catabolic process                                             |
| 21 | erythrose 4-phosphate/phosphoenolpyruvate family amino acid catabolic process |

|    |                                                                           |
|----|---------------------------------------------------------------------------|
| 22 | 'de novo' posttranslational protein folding                               |
| 23 | chaperone cofactor-dependent protein refolding                            |
| 24 | vitamin E biosynthetic process                                            |
| 25 | vitamin E metabolic process                                               |
| 26 | 'de novo' protein folding                                                 |
| 27 | fat-soluble vitamin metabolic process                                     |
| 28 | fat-soluble vitamin biosynthetic process                                  |
| 29 | glycolytic process                                                        |
| 30 | ATP generation from ADP                                                   |
| 31 | purine nucleoside diphosphate metabolic process                           |
| 32 | purine ribonucleoside diphosphate metabolic process                       |
| 33 | ADP metabolic process                                                     |
| 34 | glutamine metabolic process                                               |
| 35 | lignin biosynthetic process                                               |
| 36 | cytosolic ribosome                                                        |
| 37 | ribosome                                                                  |
| 38 | nucleolus                                                                 |
| 39 | apoplast                                                                  |
| 40 | cytosolic small ribosomal subunit                                         |
| 41 | proteasome complex                                                        |
| 42 | ribosomal subunit                                                         |
| 43 | small ribosomal subunit                                                   |
| 44 | endopeptidase complex                                                     |
| 45 | ubiquitin-like protein ligase binding                                     |
| 46 | protein tag                                                               |
| 47 | ubiquitin protein ligase binding                                          |
| 48 | copper ion binding                                                        |
| 49 | misfolded protein binding                                                 |
| 50 | enzyme binding                                                            |
| 51 | protein folding chaperone                                                 |
| 52 | protein heterodimerization activity                                       |
| 53 | water transmembrane transporter activity                                  |
| 54 | water channel activity                                                    |
| 55 | structural molecule activity                                              |
| 56 | heat shock protein binding                                                |
| 57 | pyrophosphate hydrolysis-driven proton transmembrane transporter activity |
| 58 | phosphatidylinositol kinase activity                                      |
| 59 | carbon-carbon lyase activity                                              |
| 60 | unfolded protein binding                                                  |
| 61 | ubiquitin-like modifier activating enzyme activity                        |
| 62 | ATPase-coupled cation transmembrane transporter activity                  |
| 63 | oxidoreductase activity, acting on the aldehyde or oxo group of donors    |
| 64 | aldehyde-lyase activity                                                   |

|    |                                                                                  |
|----|----------------------------------------------------------------------------------|
| 65 | ATPase activity, coupled to transmembrane movement of ions, rotational mechanism |
| 66 | proton-transporting ATPase activity, rotational mechanism                        |
