# Supplementary material for: Comparative Ubiquitination Proteomics Revealed the Salt Tolerance Mechanism in Sugar Beet Monomeric Additional Line M14
Source: MDPI journal article supplement (doi:10.3390/ijms232416088), 2022-12-17
Supplement: s1 [file s1]

Supplementary Table S8 Sugar beet M14 line root proteins with both phosphorylations and ubiquitination

| Accessioin <sup>a</sup> | Tair <sup>b</sup> | Uniprot <sup>c</sup> | Gene name <sup>d</sup> | Protein name <sup>e</sup>                             |
|-------------------------|-------------------|----------------------|------------------------|-------------------------------------------------------|
| 731369885               | AT4G05200         | Q9M0X5               | CRK25                  | Cysteine-rich receptor-like protein kinase 25         |
| 731370431               | AT4G03000         | Q0WPJ7               | RF298                  | Putative E3 ubiquitin-protein ligase RF298            |
| 731373041               | AT4G05090         | Q9M0Y6               | At4g05090              | Putative PAP-specific phosphatase                     |
| 731374019               | AT4G02570         | Q94AH6               | CUL1                   | Cullin-1                                              |
| 731374410               | AT3G59350         | B9DFG5               | PTI13                  | PTI1-like tyrosine-protein kinase 3                   |
| 731377617               | AT4G23160         | O65468               | CRK8                   | Cysteine-rich receptor-like protein kinase 8          |
| 731320933               | AT1G61870         | Q8LE47               | PPR336                 | Pentatricopeptide repeat-containing protein At1g61870 |
| 731321657               | AT1G68200         | Q9C9F5               | At1g68200              | Zinc finger CCCH domain-containing protein 15         |
| 731323540               | AT5G30510         | Q93VC7               | RPS1                   | 30S ribosomal protein S1                              |
| 731323749               | AT5G27990         | Q8L9R4               | At5g27990              | At5g27990                                             |

|           |           |            |           |                                              |
|-----------|-----------|------------|-----------|----------------------------------------------|
| 731324314 | AT5G27550 | F4K4C5     | KIN14S    | Kinesin-like protein KIN-14S                 |
| 731324480 | AT5G38640 | Q9FFV8     | MBB18.19  | At5g38640                                    |
| 731312213 | AT5G50780 | F4KAF2     | MORC4     | Protein MICRORCHIDIA 4                       |
| 731325154 | AT1G26480 | Q9C5W6     | GRF12     | 14-3-3-like protein GF14 iota                |
| 731327767 | AT5G39775 | A0A1P8BH06 | At5g39775 | Gag-Pol polyprotein/retrotransposon          |
| 731327882 | AT3G45980 | Q0WT91     | At3g45980 | Histone H2B                                  |
| 731312437 | AT5G49160 | A0A1P8BCY7 | MET1      | DNA (cytosine-5)-methyltransferase           |
| 731328696 | AT5G24750 | F4KII1     | At5g24750 | Glycosyltransferase                          |
| 731329877 | AT5G59970 | P59259     | At1g07660 | Histone H4                                   |
| 731310789 | AT3G02520 | Q96300     | GRF7      | 14-3-3-like protein GF14 nu                  |
| 731330815 | AT3G43920 | Q9LXW7     | DCL3      | Endoribonuclease Dicer homolog 3             |
| 731333780 | AT5G16350 | A0A1P8BHJ4 | MQK4.7    | O-acyltransferase (WSD1-like) family protein |
| 731333855 | AT4G00430 | F4JHB6     | PIP1:4    | Plasma membrane intrinsic protein 14         |

|           |           |        |              |                                                          |
|-----------|-----------|--------|--------------|----------------------------------------------------------|
| 731334547 | AT2G43850 | F4IS56 | ILK1         | Integrin-linked protein kinase 1                         |
| 731335064 | AT4G01570 | Q8VZE4 | At4g01570    | Pentatricopeptide repeat-containing protein At4g01570    |
| 731335068 | AT4G01100 | F4JHS4 | ADNT1        | Adenine nucleotide transporter 1                         |
| 731310858 | AT1G06970 | Q9LMJ1 | CHX14        | Cation/H <sup>+</sup> antiporter 14                      |
| 731337443 | AT5G14080 | Q9FMU2 | At5g14080    | Pentatricopeptide repeat-containing protein<br>At5g14080 |
| 731337807 | AT5G65780 | Q9FYA6 | BCAT5        | Branched-chain-amino-acid aminotransferase 5             |
| 731339186 | AT4G00980 | Q8GXX5 | A_TM018A10.1 | At4g00980                                                |
| 731339333 | AT3G13080 | Q9LK64 | ABCC3        | ABC transporter C family member 3                        |
| 731339519 | AT2G26910 | O81016 | ABCG32       | ABC transporter G family member 32                       |
| 731340192 | AT4G19210 | Q8LPJ4 | ABCE2        | ABC transporter E family member 2                        |
| 731313765 | AT3G54300 | Q9M376 | VAMP727      | Vesicle-associated membrane protein 727                  |
| 731343378 | AT3G62880 | Q9LZH8 | OEP164       | Outer envelope pore protein 16-4                         |

|           |           |            |           |                                                      |
|-----------|-----------|------------|-----------|------------------------------------------------------|
| 731343400 | AT3G04400 | P49690     | RPL23A    | 60S ribosomal protein L23                            |
| 731347368 | AT3G02890 | A0A178VJR1 | At3g02890 | Uncharacterized protein                              |
| 731348334 | AT5G53460 | Q9LV03     | GLT1      | Glutamate synthase 1                                 |
| 731348961 | AT5G16340 | Q9FFE9     | AAE6      | Probable acyl-activating enzyme 6                    |
| 731349098 | AT1G13440 | Q56WJ4     | At1g13440 | Putative glyceraldehyde-3-phosphate<br>dehydrogenase |
| 731349965 | AT1G24360 | P33207     | At1g24360 | 3-oxoacyl-[acyl-carrier-protein] reductase           |
| 731351524 | AT3G55440 | P48491     | CTIMC     | Triosephosphate isomerase                            |
| 731353170 | AT1G18640 | O82796     | PSP       | Phosphoserine phosphatase                            |
| 731353294 | AT4G34200 | O49485     | PGDH1     | D-3-phosphoglycerate dehydrogenase 1                 |
| 731353543 | AT1G04410 | B9DHX4     | At1g04410 | Malate dehydrogenase                                 |
| 731354228 | AT2G21660 | C0Z2N6     | At2g21660 | AT2G21660 protein                                    |
| 731355163 | AT2G19710 | O82206     | At2g19710 | Uncharacterized protein At2g19710                    |

|            |           |            |           |                                                   |
|------------|-----------|------------|-----------|---------------------------------------------------|
| 731358209  | AT2G06105 | A0A1P8B0V7 | At2g06105 | Aspartyl protease gag-polyprotein                 |
| 731358562  | AT1G21440 | Q501F7     | At1g21440 | At1g21440                                         |
| 731359337  | AT3G10300 | F4J2M3     | At3g10300 | Calcium-binding EF-hand family protein            |
| 731359729  | AT4G13230 | Q8LFD5     | At4g13230 | Uncharacterized protein At4g13230                 |
| 731360225  | AT1G21750 | F4HZN9     | PDIL1-1   | Protein disulfide-isomerase                       |
| 731360885  | AT1G21680 | Q9XI10     | At1g21680 | DPP6 N-terminal domain-like protein               |
| 1108779495 | AT3G10080 | Q9SR72     | At3g10080 | Germin-like protein subfamily 3 member 2          |
| 731361122  | AT1G22660 | F4I2Y2     | At1g22660 | Polynucleotide adenylyltransferase family protein |
| 731362572  | AT5G66390 | Q9FJZ9     | PER72     | Peroxidase 72                                     |
| 731362650  | AT1G77120 | P06525     | ADH1      | Alcohol dehydrogenase class-P                     |
| 731364835  | AT3G11840 | Q570W6     | At3g11840 | Uncharacterized protein At3g11840                 |
| 731366438  | AT1G30580 | Q9SA73     | YchF1     | Obg-like ATPase 1                                 |
| 731311222  | AT2G17060 | F4IMF2     | At2g17060 | ADP-ribosyl cyclase/cyclic ADP-ribose hydrolase   |

|            |           |            |                   |                                           |
|------------|-----------|------------|-------------------|-------------------------------------------|
| 731366903  | AT3G28750 | A0A654FBJ9 | AN1_LOCUS14381    | Uncharacterized protein                   |
| 731367408  | AT4G03500 | Q9ZT78     | At4g03500         | Ankyrin repeat family protein             |
| 731367897  | AT3G15570 | Q8LFK3     | At3g15570         | Non-phototropic hypocotyl protein         |
| 1108824977 | AT1G55490 | A0A178W724 | AXX17_At1g50100   | hypothetical protein                      |
| 1108865430 | AT1G75040 | A0A178WNL8 | AXX17_At1g69430   | PR5                                       |
| 1108872178 | AT4G19210 | Q8LPJ4     | ABCE2             | ABC transporter E family member 2         |
| 1108892120 | AT5G54850 | Q9FFU5     | MBG8.11           | At5g54850                                 |
| 1108902428 | AT1G07840 | Q93ZQ9     | At1g07840         | AT1G07840 protein                         |
| 1108931327 | AT3G17152 | Q9LSN2     | At3g17152         | Invertase inhibitor-like protein          |
| 1108938555 | AT4G13510 | A0A178V540 | AXX17_At4g15360   | Ammonium transporter                      |
| 1108953901 | AT1G43760 | Q9MA67     | F2J6.14           | F2J6.14 protein                           |
| 1108972321 | AT1G64940 | Q9XIQ2     | CYP89A6           | Cytochrome P450                           |
| 731378086  | AT5G14580 | A0A5S9Y435 | AT9943_LOCUS19138 | Polyribonucleotide nucleotidyltransferase |

|           |           |            |                |                           |
|-----------|-----------|------------|----------------|---------------------------|
| 731381505 | AT4G33145 | Q1G3K5     | At4g33145      | Uncharacterized protein   |
| 731311597 | AT4G34320 | Q9SYZ7     | At4g34320      | UPF0496 protein At4g34320 |
| 731320688 | AT4G31580 | A0A5S9XYC9 | AN1_LOCUS19964 | hypothetical protein      |

---

<sup>a</sup> Protein sequence number in the NCBI database. <sup>b</sup> *Arabidopsis* TAIR number. <sup>c</sup> Uniport protein number.
