# Supplementary material for: Comparative Ubiquitination Proteomics Revealed the Salt Tolerance Mechanism in Sugar Beet Monomeric Additional Line M14
Source: MDPI journal article supplement (doi:10.3390/ijms232416088), 2022-12-17
Supplement: s1 [file s1]

Supplementary Table S7 List of KEGG enrichment entries

200 mM NaCl

|    |                                             |
|----|---------------------------------------------|
| 1  | Proteasome                                  |
| 2  | Carbon fixation in photosynthetic organisms |
| 3  | Arachidonic acid metabolism                 |
| 4  | Spliceosome                                 |
| 5  | Fructose and mannose metabolism             |
| 6  | Glycolysis / Gluconeogenesis                |
| 7  | Inositol phosphate metabolism               |
| 8  | Phenylpropanoid biosynthesis                |
| 9  | Phagosome                                   |
| 10 | Biosynthesis of amino acids                 |
| 11 | Nitrogen metabolism                         |
| 12 | Fatty acid degradation                      |
| 13 | SNARE interactions in vesicular transport   |
| 14 | Pyruvate metabolism                         |
| 15 | Biosynthesis of nucleotide sugars           |
| 16 | Glutathione metabolism                      |
| 17 | Nucleocytoplasmic transport                 |
| 18 | Oxidative phosphorylation                   |
| 19 | Vitamin B6 metabolism                       |
| 20 | Pentose phosphate pathway                   |
| 21 | Citrate cycle (TCA cycle)                   |
| 22 | Tryptophan metabolism                       |
| 23 | Ribosome                                    |
| 24 | Selenocompound metabolism                   |
| 25 | mRNA surveillance pathway                   |
| 26 | Cysteine and methionine metabolism          |
| 27 | Amino sugar and nucleotide sugar metabolism |
| 28 | Phosphatidylinositol signaling system       |
| 29 | Glyoxylate and dicarboxylate metabolism     |
| 30 | Flavonoid biosynthesis                      |
| 31 | Ether lipid metabolism                      |
| 32 | Carbon metabolism                           |
| 33 | Purine metabolism                           |
| 34 | Peroxisome                                  |
| 35 | Protein processing in endoplasmic reticulum |
| 36 | Endocytosis                                 |
| 37 | Phenylalanine metabolism                    |
| 38 | Ribosome biogenesis in eukaryotes           |
| 39 | Arginine biosynthesis                       |
| 40 | Glycerophospholipid metabolism              |
| 41 | Cutin, suberine and wax biosynthesis        |

|    |                                                     |
|----|-----------------------------------------------------|
| 42 | Ubiquinone and other terpenoid-quinone biosynthesis |
| 43 | Tyrosine metabolism                                 |
| 44 | Sulfur metabolism                                   |
| 45 | Base excision repair                                |
| 46 | Fatty acid biosynthesis                             |
| 47 | alpha-Linolenic acid metabolism                     |
| 48 | N-Glycan biosynthesis                               |
| 49 | DNA replication                                     |
| 50 | Alanine, aspartate and glutamate metabolism         |
| 51 | Ascorbate and aldarate metabolism                   |
| 52 | Biosynthesis of various plant secondary metabolites |
| 53 | Homologous recombination                            |
| 54 | Glycerolipid metabolism                             |
| 55 | Nucleotide excision repair                          |
| 56 | Fatty acid metabolism                               |
| 57 | Ubiquitin mediated proteolysis                      |
| 58 | 2-Oxocarboxylic acid metabolism                     |
| 59 | Plant-pathogen interaction                          |
| 60 | Biosynthesis of cofactors                           |
| 61 | Starch and sucrose metabolism                       |
| 62 | Plant hormone signal transduction                   |

#### 400 mM NaCl

|    |                                             |
|----|---------------------------------------------|
| 1  | Biosynthesis of amino acids                 |
| 2  | Carbon fixation in photosynthetic organisms |
| 3  | Carbon metabolism                           |
| 4  | Nitrogen metabolism                         |
| 5  | Pentose phosphate pathway                   |
| 6  | Glutathione metabolism                      |
| 7  | Ubiquitin mediated proteolysis              |
| 8  | Protein processing in endoplasmic reticulum |
| 9  | Proteasome                                  |
| 10 | Glycolysis / Gluconeogenesis                |
| 11 | Arginine biosynthesis                       |
| 12 | Ribosome                                    |
| 13 | Alanine, aspartate and glutamate metabolism |
| 14 | Ascorbate and aldarate metabolism           |
| 15 | Cysteine and methionine metabolism          |
| 16 | Tryptophan metabolism                       |
| 17 | Arachidonic acid metabolism                 |
| 18 | Glyoxylate and dicarboxylate metabolism     |
| 19 | Phagosome                                   |
| 20 | Endocytosis                                 |
| 21 | Oxidative phosphorylation                   |

|    |                                                     |
|----|-----------------------------------------------------|
| 22 | Pyruvate metabolism                                 |
| 23 | Phenylalanine metabolism                            |
| 24 | Pentose and glucuronate interconversions            |
| 25 | Spliceosome                                         |
| 26 | Ubiquinone and other terpenoid-quinone biosynthesis |
| 27 | Circadian rhythm - plant                            |
| 28 | Tyrosine metabolism                                 |
| 29 | Autophagy - other                                   |
| 30 | alpha-Linolenic acid metabolism                     |
| 31 | RNA polymerase                                      |
| 32 | Arginine and proline metabolism                     |
| 33 | Biosynthesis of cofactors                           |
| 34 | Citrate cycle (TCA cycle)                           |
| 35 | Fructose and mannose metabolism                     |
| 36 | Biosynthesis of various plant secondary metabolites |
| 37 | Homologous recombination                            |
| 38 | Nucleotide excision repair                          |
| 39 | Glycine, serine and threonine metabolism            |
| 40 | 2-Oxocarboxylic acid metabolism                     |
| 41 | Phosphatidylinositol signaling system               |
| 42 | Peroxisome                                          |
| 43 | Glycerophospholipid metabolism                      |
| 44 | Biosynthesis of nucleotide sugars                   |
| 45 | Nucleocytoplasmic transport                         |
| 46 | RNA degradation                                     |
| 47 | Phenylpropanoid biosynthesis                        |
| 48 | Amino sugar and nucleotide sugar metabolism         |
| 49 | Plant hormone signal transduction                   |
