# Supplementary material for: Comparative Ubiquitination Proteomics Revealed the Salt Tolerance Mechanism in Sugar Beet Monomeric Additional Line M14
Source: Int J Mol Sci. 2022 Dec 17;23(24):16088. doi: 10.3390/ijms232416088 (PMC9782053; doi:10.3390/ijms232416088)
Supplement: Supplementary file 1 [file ijms-23-16088-s001.zip]

Archive with 9 entries (9 files):
- Table S1-Ubiquitinated protein in sugar beet treated with 200mMNaCl..xlsx
- Table S2-Ubiquitinated protein in sugar beet treated with 400mMNaCl..xlsx
- Table S3-Proteins with more than 10 ubiquitination sites in NaCl treatment.pdf
- Table S4 Differential expression of ubiquitinated proteins in the roots of sugar beet M14 line under 200 mM NaCl stress.xlsx
- Table S5 Differential expression of ubiquitinated proteins in the roots of sugar beet M14 line under 400 mM NaCl stress.xlsx
- Table S6-List of GO enrichment entries.pdf
- Table S7-List of KEGG enrichment entries.pdf
- Table S8-Sugar beet M14 line root proteins with both phosphorylations and ubiquitination.pdf
- Table S9-qRTPCR-primers.pdf
