# Supplementary material for: Comparative Ubiquitination Proteomics Revealed the Salt Tolerance Mechanism in Sugar Beet Monomeric Additional Line M14
Source: Int J Mol Sci. 2022 Dec 17;23(24):16088. doi: 10.3390/ijms232416088 (PMC9782053; doi:10.3390/ijms232416088)
Supplement: Supplementary file 1 [file ijms-23-16088-s001.zip › Table S1-Ubiquitinated protein in sugar beet treated with 200mMNaCl..xlsx]

## Sheet: Proteins
Checked	Tags	Protein FDR Confidence: Combined	Master	Unique Sequence ID	Protein Group IDs	Accession	Description	Sequence	FASTA Title Lines	Exp. q-value: Combined	Sum PEP Score	Coverage [%]	# Peptides	# PSMs	# Protein Unique Peptides	# Unique Peptides	# AAs	MW [kDa]	calc. pI	Score Sequest HT: Sequest HT	Coverage [%] (by Search Engine): Sequest HT	# PSMs (by Search Engine): Sequest HT	# Peptides (by Search Engine): Sequest HT	# Razor Peptides	Abundances (Scaled): F1: Control	Abundances (Scaled): F2: Control	Abundances (Scaled): F3: Control	Abundances (Scaled): F4: Control	Abundances (Scaled): F5: Control	Abundances (Scaled): F6: Sample	Abundances (Scaled): F7: Sample	Abundances (Scaled): F8: Sample	Abundances (Scaled): F9: Sample	Abundances (Scaled): F10: Sample	Abundance: F1: Control	Abundance: F2: Control	Abundance: F3: Control	Abundance: F4: Control	Abundance: F5: Control	Abundance: F6: Sample	Abundance: F7: Sample	Abundance: F8: Sample	Abundance: F9: Sample	Abundance: F10: Sample	Abundances (Normalized): F1: Control	Abundances (Normalized): F2: Control	Abundances (Normalized): F3: Control	Abundances (Normalized): F4: Control	Abundances (Normalized): F5: Control
FALSE		High	Master Protein	5980885327378658522	3910	731321657	PREDICTED: glutamate synthase 1 [NADH], chloroplastic isoform X1 [Beta vulgaris subsp. vulgaris]	MSVAAGVGSVLQIRSKVGSGGIFTNNHTQNDAGGVVLVPSLYRFGRRTSRSYAVRRSEAKICESKFFGNRLRSERLNPLIREPKLRSVIRSALSQVPEQPLGLYDPKYDKDSCGVGFVAELSGESSRKTVTDAVEMLVRMSHRGACGCETNTGDGAGILVGLPHDFYKEVTKDLGFELPPLGQYAVGMFFLPTSESRREESKNVFTKVAESLGHTVLGWRTVPTDNSGLGKSALLTEPVVEQVFLTPTPRSKADFEQQMYILRRVSMVAIRAALNLQHGGVRDFYICSLSSRTVVYKGQLKPSQLKEYYYWDLGNERFTSYMALVHSRFSTNTFPSWDRAQPMRVLGHNGEINTLRGNVNWMRAREGLLKCKELGLSKNEMKKLLPIVDASSSDSGAFD…	>gi|731321657|ref|XP_010671471.1| PREDICTED: glutamate synthase 1 [NADH], chloroplastic isoform X1 [Beta vulgaris subsp. vulgaris]	0	1239.95	73	146	2177	11	146	2209	242.8	6.9	4233.02	73	2177	146	0	108.1	110.4	90.2	143.5	107.8	90.4	77.9	101.5	85.9	84.2	8.43102e+08	1.74984e+09	8.84369e+08	1.15726e+09	3.33249e+08	1.17987e+09	5.21476e+08	9.56585e+08	9.93218e+08	9.3737e+08	1.71341e+09	1.74984e+09	1.43025e+09	2.27553e+09	1.70966e+09
	Checked	Confidence	Annotated Sequence	Modifications	Qvality PEP	Qvality q-value	# Protein Groups	# Proteins	# PSMs	Master Protein Accessions	Positions in Master Proteins	Modifications in Master Proteins	# Missed Cleavages	Theo. MH+ [Da]	Abundances (Scaled): F1: Control	Abundances (Scaled): F2: Control	Abundances (Scaled): F3: Control	Abundances (Scaled): F4: Control	Abundances (Scaled): F5: Control	Abundances (Scaled): F6: Sample	Abundances (Scaled): F7: Sample	Abundances (Scaled): F8: Sample	Abundances (Scaled): F9: Sample	Abundances (Scaled): F10: Sample	Quan Info	Found in Sample: [S1] F1: Control	Found in Sample: [S2] F2: Control	Found in Sample: [S3] F3: Control	Found in Sample: [S4] F4: Control	Found in Sample: [S5] F5: Control	Found in Sample: [S6] F6: Sample	Found in Sample: [S7] F7: Sample	Found in Sample: [S8] F8: Sample	Found in Sample: [S9] F9: Sample	Found in Sample: [S10] F10: Sample	Confidence (by Search Engine): Sequest HT	Percolator q-Value (by Search Engine): Sequest HT	Percolator PEP (by Search Engine): Sequest HT	XCorr (by Search Engine): Sequest HT	Top Apex RT [min]	Quan Usage	Quan Ratio Usage	Sequence in Protein	Positions in Proteins
	FALSE	High	[K].AFGYSVEALEMLMIPMAK.[D]		8.73792e-08	5.33751e-05	1	3	25	731321657	731321657 [592-609]		0	2000.99	57.1	76.4	65.2	113.8	147.8	26.2	129.6	182.4	163.4	38		High	High	High	High	High	High	High	High	High	Peak Found	High	7.23e-06	1.205e-08	2.25	100.72	Used	Used	K.AFGYSVEALEMLMIPMAK.D	[592-609]
	FALSE	High	[K].AFGYSVEALEMLMIPMAK.[D]	1xOxidation [M16]	0.00951986	0.000655491	1	3	2	731321657	731321657 [592-609]		0	2016.98			84.7				123.5	41.3	128.4	622.1		Not Found	Not Found	Peak Found	Not Found	Not Found	Not Found	Peak Found	Peak Found	Peak Found	High	High	9.745e-05	0.0009724	1.22	92.11	Used	Used	K.AFGYSVEALEMLMIPMAK.D	[592-609]
	FALSE	High	[R].AFYEYFSALMEPWDGPALITFTDGR.[Y]		6.2165e-06	5.33751e-05	1	3	6	731321657	731321657 [436-460]		0	2897.35		103.8	139.3	109.3	188		212.3		56.9	190.4		Not Found	High	Peak Found	High	High	Not Found	Peak Found	Not Found	High	High	High	7.23e-06	7.706e-07	2.27	106.31	Used	Used	R.AFYEYFSALMEPWDGPALITFTDGR.Y	[436-460]
	FALSE	High	[R].ALPIGSAESVALPNPGDYHWR.[K]		2.29042e-05	5.33751e-05	1	3	20	731321657	731321657 [917-937]		0	2250.13	184.8	67.4	106.7	41.6	204.5	95.6	115.3	79.6	68.9	35.6		High	High	High	High	High	High	High	High	High	Peak Found	High	7.23e-06	2.75e-06	2.57	99.22	Used	Used	R.ALPIGSAESVALPNPGDYHWR.K	[917-937]
	FALSE	High	[K].ALPVYIETPIR.[N]		0.000122157	9.51359e-05	1	3	27	731321657	731321657 [1389-1399]		0	1271.74	132.9	124.2	68.9	89.6	83.9	81.2	85.7	89.5	124.3	119.8		High	High	Peak Found	High	High	High	High	High	High	High	High	1.364e-05	1.432e-05	1.13	39.59	Used	Used	K.ALPVYIETPIR.N	[1389-1399]
	FALSE	High	[K].ALPVYIETPIRNVNR.[A]		0.00304619	0.000222105	1	3	10	731321657	731321657 [1389-1403]		1	1754.99	374	148.2	1.3	205.2	146		33.3	59.4	20.8	11.7		High	High	Peak Found	High	High	Not Found	Peak Found	High	Peak Found	Peak Found	High	3.769e-05	0.000307	2.08	31.69	Used	Used	K.ALPVYIETPIRNVNR.A	[1389-1403]
	FALSE	High	[R].APGNPWPQWPR.[V]		2.08073e-05	5.33751e-05	1	3	59	731321657	731321657 [2025-2035]		0	1305.65	373.8	111.5	66.5	80.6	72.6	41	62.9	67.4	54.9	68.7		High	High	High	High	High	High	High	High	High	High	High	7.23e-06	2.502e-06	2.15	37.46	Used	Used	R.APGNPWPQWPR.V	[2025-2035]
	FALSE	High	[R].AVGTMLSHEVTK.[R]		3.5742e-05	5.33751e-05	1	3	11	731321657	731321657 [1404-1415]		0	1272.66	112.3	118.4	189.7	194.7		123.9	51.6	25.2	140.4	43.9		High	High	Peak Found	High	Not Found	High	High	Peak Found	High	High	High	7.23e-06	4.267e-06	2.67	9.45	Used	Used	R.AVGTMLSHEVTK.R	[1404-1415]
	FALSE	High	[R].AVGTMLSHEVTKR.[Y]		2.44677e-06	5.33751e-05	1	3	34	731321657	731321657 [1404-1416]		1	1428.76	153.6	59.5	139.1	204.3	147.9	52.8	64.7	76.6	52.1	49.4		High	High	High	High	High	High	High	Peak Found	High	Peak Found	High	7.23e-06	3.102e-07	3.35	10.64	Used	Used	R.AVGTMLSHEVTKR.Y	[1404-1416]
	FALSE	High	[K].AVVEGVGDHGCEYMTGGTVVVLGK.[T]	1xCarbamidomethyl [C11]	4.25089e-08	5.33751e-05	1	3	23	731321657	731321657 [1518-1541]		0	2434.17	27.6	260.7		130.7	47.7	99	41.5	146.8	120.7	125.4		Peak Found	High	Not Found	High	High	High	High	High	High	High	High	7.23e-06	5.979e-09	5.08	33.64	Used	Used	K.AVVEGVGDHGCEYMTGGTVVVLGK.T	[1518-1541]
	FALSE	High	[R].CFTGTASRVEGATFEMLASDALKLHEMAFPR.[R]	1xCarbamidomethyl [C1]	0.00018812	9.51359e-05	1	3	2	731321657	731321657 [885-915]		2	3443.65				768.8					231.2			Not Found	Not Found	Not Found	High	Not Found	Not Found	Not Found	Not Found	Peak Found	Not Found	High	1.696e-05	2.173e-05	3.46	105.83	Used	Used	R.CFTGTASRVEGATFEMLASDALKLHEMAFPR.R	[885-915]
	FALSE	High	[R].CNPELVDLDKVEDEEDITTLR.[M]	1xCarbamidomethyl [C1]	2.02685e-07	5.33751e-05	1	3	20	731321657	731321657 [1568-1588]		1	2503.19	39.3	259.1	31.9	152.3	50	54.9	99.6	121.9	101.6	89.3		Peak Found	High	High	High	High	High	High	High	High	High	High	7.23e-06	2.734e-08	3.43	48.03	Used	Used	R.CNPELVDLDKVEDEEDITTLR.M	[1568-1588]
	FALSE	High	[R].CVQKQDHGLDMALDQELIELSK.[A]	1xCarbamidomethyl [C1]	9.11125e-08	5.33751e-05	1	3	10	731321657	731321657 [1362-1383]		1	2570.26	7.5	254.2	16.5	435.4	26.7	109.3	38.5	46.5	29	36.3		Peak Found	High	Peak Found	High	High	High	Peak Found	Peak Found	High	Peak Found	High	7.23e-06	1.254e-08	5.84	49.85	Used	Used	R.CVQKQDHGLDMALDQELIELSK.A	[1362-1383]
	FALSE	High	[R].DAIKEGYTVLVLSDR.[A]		1.49543e-06	5.33751e-05	1	3	38	731321657	731321657 [736-750]		1	1678.9	153.2	95.2	70.4	119.2	170	56.5	39.4	146.5	96.9	52.7		High	High	High	High	High	High	High	High	High	High	High	7.23e-06	1.916e-07	1.51	41.33	Used	Used	R.DAIKEGYTVLVLSDR.A	[736-750]
	FALSE	High	[K].DATEALGSMGNDTPLAVMSNR.[E]		5.07971e-09	5.33751e-05	1	3	23	731321657	731321657 [610-630]		0	2149.99	31	247.3	37.6	42.4	51.2	109.5	100.7	131.4	129.2	119.8		High	High	Peak Found	High	High	High	High	High	High	High	High	7.23e-06	7.534e-10	3.11	54.92	Used	Used	K.DATEALGSMGNDTPLAVMSNR.E	[610-630]
	FALSE	High	[K].DLGFELPPLGQYAVGMFFLPTSESR.[R]		2.34332e-05	5.33751e-05	1	1	8	731321657	731321657 [173-197]		0	2771.37	34.4	5.2	312.1	62.3	77.1		49.6	126.7	252.3	80.3		Peak Found	Peak Found	Peak Found	Peak Found	High	High	Peak Found	High	High	High	High	7.23e-06	2.815e-06	2.49	105.42	Used	Used	K.DLGFELPPLGQYAVGMFFLPTSESR.R	[173-197]
	FALSE	High	[K].DLGFELPPLGQYAVGMFFLPTSESRR.[E]		0.185966	0.00885362	1	1	1	731321657	731321657 [173-198]		1	2927.48			821.3		127	51.7						Not Found	Not Found	Peak Found	Not Found	Peak Found	High	Not Found	Not Found	Not Found	Not Found	High	0.001302	0.0228	1.9	103.89	Used	Used	K.DLGFELPPLGQYAVGMFFLPTSESRR.E	[173-198]
	FALSE	High	[R].DLPIEGR.[D]		0.0928579	0.00464979	1	3	2	731321657	731321657 [1944-1950]		0	799.431	13.1	2.8		23.7	48.9	321.4	2.1	120.1	283.3	184.6		Peak Found	Peak Found	Not Found	Peak Found	High	High	Peak Found	Peak Found	Peak Found	Peak Found	High	0.0006734	0.01005	1.14	13.36	Used	Used	R.DLPIEGR.D	[1944-1950]
	FALSE	High	[R].DLPIEGRDLSGIHFAMEFLHANTK.[S]		1.0903e-06	5.33751e-05	1	3	3	731321657	731321657 [1944-1967]		1	2711.36	790.8	61.8		25.7	50.7	28.6		26.7	15.9			High	Peak Found	Not Found	Peak Found	Peak Found	Peak Found	Not Found	Peak Found	Peak Found	Not Found	High	7.23e-06	1.411e-07	4.24	74.23	Used	Used	R.DLPIEGRDLSGIHFAMEFLHANTK.S	[1944-1967]
	FALSE	High	[R].DLSGIHFAMEFLHANTK.[S]		3.98892e-09	5.33751e-05	1	3	91	731321657	731321657 [1951-1967]		0	1930.95	54.8	79.2	112.8	115.1	54	92.6	92.9	186.8	104.8	107.1		High	High	High	High	High	High	High	High	High	High	High	7.23e-06	5.946e-10	5.36	109.34	Used	Used	R.DLSGIHFAMEFLHANTK.S	[1951-1967]
	FALSE	High	[R].DLSGIHFAMEFLHANTK.[S]	1xOxidation [M9]	4.94788e-07	5.33751e-05	1	3	12	731321657	731321657 [1951-1967]		0	1946.94	0.4	0.6		16.2	203	186.9	5.1	91.6	185.1	311.1		Peak Found	Peak Found	Not Found	Peak Found	High	Peak Found	Peak Found	High	High	High	High	7.23e-06	6.528e-08	3.42	53.79	Used	Used	R.DLSGIHFAMEFLHANTK.S	[1951-1967]
	FALSE	High	[R].EALDRLLETNNFPEFTGR.[V]		0.000710857	0.000154279	1	3	2	731321657	731321657 [1776-1793]		1	2122.06	23.6			534.2	68.7				19.7	353.9		Peak Found	Not Found	Not Found	High	Peak Found	Not Found	Not Found	Not Found	Peak Found	Peak Found	High	2.258e-05	7.639e-05	2.22	50.46	Used	Used	R.EALDRLLETNNFPEFTGR.V	[1776-1793]
	FALSE	High	[R].EGIQYRDPYER.[M]		0.00401983	0.000400026	1	3	14	731321657	731321657 [1707-1717]		1	1425.68	81.2	89.7	129.8	146.8	164.6	59.1	90.6	49	97.9	91.1		High	High	High	High	High	High	High	High	High	Peak Found	High	5.451e-05	0.0004035	2.39	12.55	Used	Used	R.EGIQYRDPYER.M	[1707-1717]
	FALSE	High	[K].EGYTVLVLSDR.[A]		0.135011	0.00645265	1	3	1	731321657	731321657 [740-750]		0	1251.66		20.6	472.4	255.3	251.6							Not Found	Peak Found	High	Peak Found	Peak Found	Not Found	Not Found	Not Found	Not Found	Not Found	High	0.0009384	0.01546	0.82	26.03	Used	Used	K.EGYTVLVLSDR.A	[740-750]
	FALSE	High	[R].EKLTFEYFK.[Q]		0.0139982	0.000935615	1	3	11	731321657	731321657 [631-639]		1	1204.62	137.8	207.7	2.2	84.3	172.7	69.4	41	158.3	65.9	60.6		High	High	Peak Found	High	High	High	Peak Found	Peak Found	Peak Found	High	High	0.0001355	0.001438	2.22	29.34	Used	Used	R.EKLTFEYFK.Q	[631-639]
	FALSE	High	[K].EQANQTEEVEEEFKRPSRVPDAQK.[H]		0.0824409	0.00406519	1	3	1	731321657	731321657 [1674-1697]		2	2844.38		246.7		733.8						19.5		Not Found	Peak Found	Not Found	High	Not Found	Not Found	Not Found	Not Found	Not Found	Peak Found	High	0.0005852	0.008742	2.15	13.34	Used	Used	K.EQANQTEEVEEEFKRPSRVPDAQK.H	[1674-1697]
	FALSE	High	[K].EVEGSEEYIEADLVLLAMGFLGPEANVADKLGVEKDNR.[S]		2.47531e-07	5.33751e-05	1	3	1	731321657	731321657 [2094-2131]		2	4120.04			1000									Not Found	Not Found	High	Not Found	Not Found	Not Found	Not Found	Not Found	Not Found	Not Found	High	7.23e-06	3.318e-08	6.22	107.52	Used	Used	K.EVEGSEEYIEADLVLLAMGFLGPEANVADKLGVEKDNR.S	[2094-2131]
	FALSE	High	[K].EVTKDLGFELPPLGQYAVGMFFLPTSESR.[R]		6.73894e-05	5.33751e-05	1	1	7	731321657	731321657 [169-197]		1	3228.63	80.6	10.8	252.7	122.9	238.2	12.6	37.5	125.6		119.2		Peak Found	Peak Found	High	High	Peak Found	Peak Found	High	High	Not Found	High	High	7.23e-06	7.939e-06	2.74	100.9	Used	Used	K.EVTKDLGFELPPLGQYAVGMFFLPTSESR.R	[169-197]
	FALSE	High	[K].EYYYWDLGNER.[F]		0.00128137	0.000154279	1	1	2	731321657	731321657 [307-317]		0	1507.65			50.5	79.8	86.6	473.8	135.7		52.8	120.8		Not Found	Not Found	Peak Found	Peak Found	Peak Found	High	Peak Found	Not Found	Peak Found	High	High	2.424e-05	0.000134	2.11	44.74	Used	Used	K.EYYYWDLGNER.F	[307-317]
	FALSE	High	[K].FAGEPEHVINFFFMLAEEVREIMSQLGFR.[N]		5.3632e-08	5.33751e-05	1	3	1	731321657	731321657 [1286-1314]		1	3443.69											No Quan Values	Not Found	Not Found	Not Found	Not Found	Not Found	Not Found	Not Found	Not Found	High	Not Found	High	7.23e-06	7.475e-09	5.43		Not Used	Not Used	K.FAGEPEHVINFFFMLAEEVREIMSQLGFR.N	[1286-1314]
	FALSE	High	[R].FGVSSYYLTNADELQIK.[M]		6.88234e-07	5.33751e-05	1	3	39	731321657	731321657 [1073-1089]		0	1947.97	186.5	173.6	24.4	155.7	84.5	35.7	33.8	164.9	85.2	55.6		High	High	High	High	High	High	High	High	High	High	High	7.23e-06	9.004e-08	3.62	54.53	Used	Used	R.FGVSSYYLTNADELQIK.M	[1073-1089]
	FALSE	High	[R].FSTNTFPSWDR.[A]		2.91575e-05	5.33751e-05	1	2	20	731321657	731321657 [329-339]		0	1357.62	166.7	95.8	111.3	81.7	86	83.3	90.8	90.5	104.9	89.1		High	High	High	High	High	High	High	High	High	High	High	7.23e-06	3.49e-06	2.02	35.62	Used	Used	R.FSTNTFPSWDR.A	[329-339]
	FALSE	High	[R].FTSYMALVHSR.[F]		1.52301e-05	5.33751e-05	1	1	23	731321657	731321657 [318-328]		0	1311.65	11.7	87.2	15.6	82.8	45.2	45.6	54.2	360.4	153.1	144.2		Peak Found	High	Peak Found	High	High	High	High	High	High	High	High	7.23e-06	1.847e-06	2.93	19.01	Used	Used	R.FTSYMALVHSR.F	[318-328]
	FALSE	High	[R].FYITHSGR.[V]		0.00180885	0.00019222	1	3	8	731321657	731321657 [476-483]		0	980.495	79.5	39.8	296.8	227.1	17.3	174.4		43.3		121.8		Peak Found	Peak Found	High	Peak Found	Peak Found	High	High	Peak Found	Not Found	Peak Found	High	2.806e-05	0.0001865	1.11	74.34	Used	Used	R.FYITHSGR.V	[476-483]
	FALSE	High	[R].GACGCETNTGDGAGILVGLPHDFYK.[E]	2xCarbamidomethyl [C3; C5]	8.71303e-05	5.33751e-05	1	1	3	731321657	731321657 [144-168]		0	2609.18		274.9	350.5		57.1			124.7	77.9	114.8		Not Found	High	High	Not Found	Peak Found	Not Found	Not Found	Peak Found	Peak Found	Peak Found	High	7.23e-06	1.027e-05	2.84	48.02	Used	Used	R.GACGCETNTGDGAGILVGLPHDFYK.E	[144-168]
	FALSE	High	[K].GAQIFEAVGLSSEVIER.[C]		3.23272e-06	5.33751e-05	1	3	18	731321657	731321657 [868-884]		0	1804.94	16.3	75.6	16.3	118.4	28.1	70	37	239.1	289.6	109.5		Peak Found	High	Peak Found	High	Peak Found	High	High	High	High	High	High	7.23e-06	4.071e-07	2.12	50.73	Used	Used	K.GAQIFEAVGLSSEVIER.C	[868-884]
	FALSE	High	[R].GFVAYEREGIQYRDPYER.[M]		0.0234322	0.00150095	1	3	13	731321657	731321657 [1700-1717]		2	2248.08	237.1	12	3.5	124.1	275.5	1.5	59.2	141.9	52.3	92.8		Peak Found	Peak Found	Peak Found	High	High	Peak Found	High	High	Peak Found	Peak Found	High	0.0002209	0.002409	1.78	25.06	Used	Used	R.GFVAYEREGIQYRDPYER.M	[1700-1717]
	FALSE	High	[K].GGELHLNDPLAIAK.[L]		0.00158527	0.000154279	1	3	2	731321657	731321657 [939-952]		0	1447.79	498.2	270.2	13.5	12.9			62.8	107.6	7.2	27.5		High	High	Peak Found	Peak Found	Not Found	Not Found	Peak Found	Peak Found	Peak Found	Peak Found	High	2.424e-05	0.0001634	2.13	29.41	Used	Used	K.GGELHLNDPLAIAK.L	[939-952]
	FALSE	High	[K].GHADHVLISGHDGGTGASR.[W]		5.46386e-08	5.33751e-05	1	3	7	731321657	731321657 [1174-1192]		0	1843.88	359.9		80	33.5	85.9	162	77.4	129.5	72			High	High	Peak Found	Peak Found	Peak Found	High	Peak Found	Peak Found	High	Not Found	High	7.23e-06	7.607e-09	4.42	8.87	Used	Used	K.GHADHVLISGHDGGTGASR.W	[1174-1192]
	FALSE	High	[K].GLEETLDRICAEAR.[D]	1xCarbamidomethyl [C10]	0.000236003	9.51359e-05	1	3	3	731321657	731321657 [722-735]		1	1632.8	243.1	273.6		119.6	129.7		64.2	57.2	112.7			Peak Found	High	Not Found	High	High	Not Found	Peak Found	Peak Found	Peak Found	Not Found	High	1.696e-05	2.692e-05	1.81	41.42	Used	Used	K.GLEETLDRICAEAR.D	[722-735]
	FALSE	High	[R].GNVNWMR.[A]		0.00701864	0.000491899	1	3	22	731321657	731321657 [357-363]		0	876.414	95.7	79.7	203.4	97.1	107.5	52.3	109.2	79.7	111.2	64.2		High	High	High	High	Peak Found	High	High	High	High	High	High	7.255e-05	0.0007092	1.33	11.39	Used	Used	R.GNVNWMR.A	[357-363]
	FALSE	High	[K].GPLLSIEEMEAVKK.[M]		1.18761e-05	5.33751e-05	1	3	11	731321657	731321657 [686-699]		1	1543.84	56.7	104.1	42.2	144.6	278.6	99	65.5	81.8	58	69.4		High	High	Peak Found	High	High	Peak Found	High	High	High	Peak Found	High	7.23e-06	1.446e-06	3.77	33.82	Used	Used	K.GPLLSIEEMEAVKK.M	[686-699]
	FALSE	High	[R].GQSLVVWAISEGR.[Q]		2.04143e-06	5.33751e-05	1	3	63	731321657	731321657 [2157-2169]		0	1401.75	62	61.9	21.3	101.3	92.2	58.1	37.7	349.9	136	79.5		High	High	High	High	High	High	High	High	High	High	High	7.23e-06	2.596e-07	3.77	49.11	Used	Used	R.GQSLVVWAISEGR.Q	[2157-2169]
	FALSE	High	[R].HGCSNVVNLELLPQPPNSR.[A]	1xCarbamidomethyl [C3]	7.01148e-07	5.33751e-05	1	3	14	731321657	731321657 [2006-2024]		0	2131.07	35.2	159.7	61.9	141.7	103.2	126.5	91.8	65.9	123.1	90.9		High	High	High	High	Peak Found	High	High	High	High	High	High	7.23e-06	9.179e-08	3.48	27.79	Used	Used	R.HGCSNVVNLELLPQPPNSR.A	[2006-2024]
	FALSE	High	[R].HTNSKLAQEVLANLDYLLPK.[F]		0.00913333	0.000621929	1	3	1	731321657	731321657 [1597-1616]		1	2267.24	832.6	109.5						57.9				High	Peak Found	Not Found	Not Found	Not Found	Not Found	Not Found	Peak Found	Not Found	Not Found	High	9.099e-05	0.0009289	1.62	85.02	Used	Used	R.HTNSKLAQEVLANLDYLLPK.F	[1597-1616]
	FALSE	High	[R].KCHKNTCPVGIATQDPVLR.[A]	2xCarbamidomethyl [C2; C7]	0.000122157	9.51359e-05	1	3	1	731321657	731321657 [1265-1283]		2	2194.12	61.5	7.3	21.8	720.2	128.4		8.4		36.8	15.6		Peak Found	Peak Found	Peak Found	High	Peak Found	Not Found	Peak Found	Not Found	Peak Found	Peak Found	High	1.364e-05	1.434e-05	4.38	13.03	Used	Used	R.KCHKNTCPVGIATQDPVLR.A	[1265-1283]
	FALSE	High	[R].KGGELHLNDPLAIAK.[L]		2.54532e-07	5.33751e-05	1	3	31	731321657	731321657 [938-952]		1	1575.89	97	84.9	214.1	162.4	182.5	65.8	80.9	26.2	29.5	56.9		High	High	High	High	High	High	High	High	High	High	High	7.23e-06	3.414e-08	6.12	99.15	Used	Used	R.KGGELHLNDPLAIAK.L	[938-952]
	FALSE	High	[R].KGLEETLDRICAEAR.[D]	1xCarbamidomethyl [C11]	4.67719e-05	5.33751e-05	1	3	4	731321657	731321657 [721-735]		2	1760.9	68	216.6	13	52.6	359.8	132.3	9.7	3.7	56.8	87.5		Peak Found	High	Peak Found	High	High	High	Peak Found	Peak Found	Peak Found	Peak Found	High	7.23e-06	5.557e-06	2.73	29.04	Used	Used	R.KGLEETLDRICAEAR.D	[721-735]
	FALSE	High	[K].KLLPIVDASSSDSGAFDGVLELLVR.[A]		2.83253e-07	5.33751e-05	1	3	5	731321657	731321657 [383-407]		1	2601.41	100	45.9	182.1	192.9	192.3	30.2	70.6	54.5	78.2	53.2		High	High	Peak Found	Peak Found	Peak Found	High	Peak Found	Peak Found	High	High	High	7.23e-06	3.788e-08	3.39	101.3	Used	Used	K.KLLPIVDASSSDSGAFDGVLELLVR.A	[383-407]
	FALSE	High	[K].KQYSLARPYGDWLKR.[Q]		5.51049e-05	5.33751e-05	1	3	6	731321657	731321657 [529-543]		2	1881.01		29.2	88.9	91.5	52.6	339.9	27.1	55.1	131.5	184		Not Found	High	Peak Found	High	Peak Found	High	Peak Found	Peak Found	High	Peak Found	High	7.23e-06	6.518e-06	3.3	18	Used	Used	K.KQYSLARPYGDWLKR.Q	[529-543]
	FALSE	High	[R].KTVTDAVEMLVR.[M]		1.02454e-05	5.33751e-05	1	1	27	731321657	731321657 [128-139]		1	1361.75	107.7	128.7	14	297.8	162	103.1	56.7	59.9	34.5	35.7		High	High	Peak Found	High	High	High	High	High	High	Peak Found	High	7.23e-06	1.254e-06	3.35	34.64	Used	Used	R.KTVTDAVEMLVR.M	[128-139]
	FALSE	High	[K].KVAVVGSGPSGLAAADQLNK.[M]		8.17672e-05	5.33751e-05	1	3	7	731321657	731321657 [1843-1862]		1	1882.04	284.8	80	5.8	58.2	29.3	118.2	115.2	104.3	149	55.1		High	High	Peak Found	Peak Found	Peak Found	High	High	High	High	Peak Found	High	7.23e-06	9.607e-06	3.38	18.42	Used	Used	K.KVAVVGSGPSGLAAADQLNK.M	[1843-1862]
	FALSE	High	[K].KVVVIGGGDTGTDCIGTSIR.[H]	1xCarbamidomethyl [C14]	8.47686e-06	5.33751e-05	1	3	4	731321657	731321657 [1986-2005]		1	2005.04		207	9.8	57.1	97.9	116.2	104.7	30.5	187.7	189.1		Not Found	High	Peak Found	High	Peak Found	High	Peak Found	Peak Found	High	Peak Found	High	7.23e-06	1.04e-06	4.39	16.83	Used	Used	K.KVVVIGGGDTGTDCIGTSIR.H	[1986-2005]
	FALSE	High	[R].IAPPISGAVAVSNQDEDMEK.[M]		0.000169286	9.51359e-05	1	3	2	731321657	731321657 [561-580]		0	2071	161.3	124.3		32.4	24.4	136.6	142	222	99.6	57.3		Peak Found	Peak Found	Not Found	Peak Found	Peak Found	High	Peak Found	High	Peak Found	Peak Found	High	1.696e-05	1.967e-05	1.5	26.96	Used	Used	R.IAPPISGAVAVSNQDEDMEK.M	[561-580]
	FALSE	High	[R].IAPPISGAVAVSNQDEDMEKMGIYGLLAPLK.[A]		0.00061255	0.000126394	1	3	3	731321657	731321657 [561-591]		1	3227.67		65.5		453.2			109.3	90	282.1			Not Found	Peak Found	Not Found	High	Not Found	Not Found	Peak Found	Peak Found	High	Not Found	High	1.859e-05	6.643e-05	1.63	77.13	Used	Used	R.IAPPISGAVAVSNQDEDMEKMGIYGLLAPLK.A	[561-591]
	FALSE	High	[K].LAQEVLANLDYLLPK.[F]		2.34662e-06	5.33751e-05	1	3	48	731321657	731321657 [1602-1616]		0	1699.96	93.4	233.9	94.8	105.3	43.9	126.9	97.7	66	70.9	67.1		High	High	Peak Found	High	High	High	High	High	High	High	High	7.23e-06	2.976e-07	2.58	80.29	Used	Used	K.LAQEVLANLDYLLPK.F	[1602-1616]
	FALSE	High	[R].IGGLMMYGVPNMK.[T]		3.1494e-05	5.33751e-05	1	3	28	731321657	731321657 [1876-1888]		0	1410.69	116.2	75.6	43.6	171.4	117.6	66.7	114.4	127.1	82.5	84.9		High	High	High	High	High	High	Peak Found	High	High	High	High	7.23e-06	3.759e-06	2.47	46.95	Used	Used	R.IGGLMMYGVPNMK.T	[1876-1888]
	FALSE	High	[R].IGGLMMYGVPNMKTDKVDVVQR.[R]		2.88569e-07	5.33751e-05	1	3	2	731321657	731321657 [1876-1897]		2	2451.26	359.8	125.6		369.2	23.3		7.1	57.3		57.6		High	Peak Found	Not Found	High	Peak Found	Not Found	Peak Found	Peak Found	Not Found	Peak Found	High	7.23e-06	3.86e-08	4.42	37.73	Used	Used	R.IGGLMMYGVPNMKTDKVDVVQR.R	[1876-1897]
	FALSE	High	[K].LHEMAFPR.[R]		0.00197837	0.000222105	1	3	5	731321657	731321657 [908-915]		0	1000.5	79.8	68.5	150	197.1	210.3	71.2	91	23.9	24.5	83.6		Peak Found	Peak Found	Peak Found	High	High	High	Peak Found	High	Peak Found	Peak Found	High	3.512e-05	0.0002028	2.1	10.2	Used	Used	K.LHEMAFPR.R	[908-915]
	FALSE	High	[R].LKEDNDAIVLAVGATKPR.[D]		1.10407e-08	5.33751e-05	1	3	43	731321657	731321657 [1926-1943]		1	1910.07	86.4	75.8	194.6	147.5	182.5	71.5	46.7	66.5	46.9	81.6		High	High	High	High	High	High	High	High	High	High	High	7.23e-06	1.601e-09	6.37	11.37	Used	Used	R.LKEDNDAIVLAVGATKPR.D	[1926-1943]
	FALSE	High	[R].LLETNNFPEFTGR.[V]		9.73782e-06	5.33751e-05	1	3	25	731321657	731321657 [1781-1793]		0	1537.76	74	112.7	32	117.4	167.4	78.4	86.1	96.2	93.4	142.3		High	High	High	High	High	High	High	High	High	High	High	7.23e-06	1.193e-06	2.92	39.77	Used	Used	R.LLETNNFPEFTGR.V	[1781-1793]
	FALSE	High	[K].LLPIVDASSSDSGAFDGVLELLVR.[A]		2.10013e-09	5.33751e-05	1	3	38	731321657	731321657 [384-407]		0	2473.32	57.6	192.5	115.8	79.8	128.4	201.3	92.2	48.5	41.8	42.3		High	High	High	High	High	High	High	High	High	High	High	7.23e-06	3.174e-10	4.79	101.25	Used	Used	K.LLPIVDASSSDSGAFDGVLELLVR.A	[384-407]
	FALSE	High	[R].LNPGMMLLVDFDKHIVVDDDALK.[K]		8.39882e-06	5.33751e-05	1	3	3	731321657	731321657 [506-528]		1	2598.33	45.3	42.5	227.1	87.5	76.8		229.2	10.8	229	51.8		Peak Found	High	High	Peak Found	Peak Found	Not Found	Peak Found	Peak Found	High	Peak Found	High	7.23e-06	1.034e-06	3.97	99.88	Used	Used	R.LNPGMMLLVDFDKHIVVDDDALK.K	[506-528]
	FALSE	High	[R].LNPGMMLLVDFDKHIVVDDDALKK.[Q]		3.61361e-06	5.33751e-05	1	3	10	731321657	731321657 [506-529]		2	2726.43	7.1	57.7	106.2	136.4		203.1	395.7	2.3	31.6	59.8		Peak Found	High	High	High	Not Found	High	High	Peak Found	High	High	High	7.23e-06	4.537e-07	4.44	105.83	Used	Used	R.LNPGMMLLVDFDKHIVVDDDALKK.Q	[506-529]
	FALSE	High	[R].LPDGSMNPK.[R]		0.00657467	0.000491899	1	3	1	731321657	731321657 [1053-1061]		0	958.466	48.3	28.9	52.9	466.8	84.4	133.6		20.2	54.4	110.5		Peak Found	Peak Found	Peak Found	Peak Found	Peak Found	High	Not Found	Peak Found	Peak Found	Peak Found	High	6.94e-05	0.0006638	1.82	10.11	Used	Used	R.LPDGSMNPK.R	[1053-1061]
	FALSE	High	[K].IPEFNELVYQNR.[W]		0.000105943	5.33751e-05	1	3	2	731321657	731321657 [1762-1773]		0	1521.77		60.6	413		521.6			4.9				Not Found	High	High	Not Found	Peak Found	Not Found	Not Found	Peak Found	Not Found	Not Found	High	7.23e-06	1.246e-05	1.8	34.41	Used	Used	K.IPEFNELVYQNR.W	[1762-1773]
	FALSE	High	[K].IPLEEVQPASEIVKR.[F]		2.3865e-05	5.33751e-05	1	3	11	731321657	731321657 [994-1008]		1	1707.96	21.9	86.4	47.6	103.2	129	158.2	137	39	108	169.8		Peak Found	High	High	High	Peak Found	High	High	Peak Found	High	High	High	7.23e-06	2.86e-06	3.5	18.91	Used	Used	K.IPLEEVQPASEIVKR.F	[994-1008]
	FALSE	High	[R].LSLKGPLLSIEEMEAVK.[K]		0.0076809	0.000524579	1	3	2	731321657	731321657 [682-698]		1	1857.04	163.4	229.5		174.8	97.3	143.9	78.8		15.6	96.8		Peak Found	High	Not Found	High	Peak Found	Peak Found	Peak Found	Not Found	Peak Found	Peak Found	High	7.887e-05	0.0007796	2.02	57.3	Used	Used	R.LSLKGPLLSIEEMEAVK.K	[682-698]
	FALSE	High	[R].LSLKGPLLSIEEMEAVKK.[M]		3.5742e-05	5.33751e-05	1	3	13	731321657	731321657 [682-699]		2	1985.14	550.6	31.8	54.8	78.9	15	171.9	28	18.6	39.8	10.6		High	High	Peak Found	High	Peak Found	High	High	High	High	High	High	7.23e-06	4.254e-06	3.98	44.7	Used	Used	R.LSLKGPLLSIEEMEAVKK.M	[682-699]
	FALSE	High	[K].LTFEYFK.[Q]		0.00193433	0.000222105	1	3	18	731321657	731321657 [633-639]		0	947.487	116.9	163.5	57.9	214.9	25.9	71.1	80	95	107.3	67.5		High	High	High	High	High	Peak Found	High	High	High	High	High	3.512e-05	0.0001981	1.32	37.44	Used	Used	K.LTFEYFK.Q	[633-639]
	FALSE	High	[K].IVLKDIVDSVAQTK.[R]		2.19891e-06	5.33751e-05	1	3	7	731321657	731321657 [546-559]		1	1528.89		90.5	434	90.4	178.3	107	20.1	16.3	38	25.3		Not Found	High	High	High	Peak Found	High	Peak Found	Peak Found	Peak Found	Peak Found	High	7.23e-06	2.788e-07	3.53	33.54	Used	Used	K.IVLKDIVDSVAQTK.R	[546-559]
	FALSE	High	[K].IVLKDIVDSVAQTKR.[I]		9.45647e-08	5.33751e-05	1	3	31	731321657	731321657 [546-560]		2	1685	112	122.3	64.3	267.3	154.1	76.3	61.2	72.3	26	44.2		High	High	Peak Found	High	High	High	High	High	High	High	High	7.23e-06	1.302e-08	4.81	34.71	Used	Used	K.IVLKDIVDSVAQTKR.I	[546-560]
	FALSE	High	[K].LVSEAGVGVIAAGVVK.[G]		3.49155e-07	5.33751e-05	1	3	40	731321657	731321657 [1158-1173]		0	1468.87	95.6	151.1	18.5	79	77.9	115.6	80.3	170.9	106.2	104.9		High	High	High	High	High	High	High	High	High	High	High	7.23e-06	4.65e-08	4	36.42	Used	Used	K.LVSEAGVGVIAAGVVK.G	[1158-1173]
	FALSE	High	[K].LVSEAGVGVIAAGVVKGHADHVLISGHDGGTGASR.[W]		2.90254e-05	5.33751e-05	1	3	2	731321657	731321657 [1158-1192]		1	3293.73				1000								Not Found	Not Found	Not Found	High	Not Found	Not Found	Not Found	Not Found	Not Found	Not Found	High	7.23e-06	3.476e-06	3.17	35.29	Used	Used	K.LVSEAGVGVIAAGVVKGHADHVLISGHDGGTGASR.W	[1158-1192]
	FALSE	High	[K].IVTSMECMIGPEGDLTEITEEQCHR.[L]	2xCarbamidomethyl [C7; C23]	1.07211e-07	5.33751e-05	1	3	17	731321657	731321657 [657-681]		0	2935.29		361.8	30.5	119.7	52.5	57.8	87.2	98.2	105.4	86.9		Not Found	High	High	High	Peak Found	High	High	High	High	High	High	7.23e-06	1.467e-08	4.82	52.29	Used	Used	K.IVTSMECMIGPEGDLTEITEEQCHR.L	[657-681]
	FALSE	High	[K].IVVYPPSTSGFDPK.[E]		0.160847	0.00764372	1	3	2	731321657	731321657 [1468-1481]		0	1506.78					16.8	361.7	341.8		60	219.7		Not Found	Not Found	Not Found	Not Found	Peak Found	Peak Found	High	Not Found	Peak Found	High	High	0.001126	0.01902	0.73	22.76	Used	Used	K.IVVYPPSTSGFDPK.E	[1468-1481]
	FALSE	High	[K].IVVYPPSTSGFDPKENIVIGNVALYGATSGEAYFNGMAAER.[F]		5.46211e-05	5.33751e-05	1	3	1	731321657	731321657 [1468-1508]		1	4305.12											No Quan Values	Not Found	High	Not Found	Not Found	Not Found	Not Found	Not Found	Not Found	Not Found	Not Found	High	7.23e-06	6.463e-06	2.89		Not Used	Not Used	K.IVVYPPSTSGFDPKENIVIGNVALYGATSGEAYFNGMAAER.F	[1468-1508]
	FALSE	High	[K].MAASALKEQANQTEEVEEEFKRPSR.[V]		4.00196e-06	5.33751e-05	1	3	6	731321657	731321657 [1667-1691]		2	2878.4	10.5	41.1	4.1	185.9	527.4	139.4	3.2	17.3	17.4	53.7		Peak Found	High	Peak Found	High	High	Peak Found	High	Peak Found	Peak Found	Peak Found	High	7.23e-06	5.007e-07	5.23	17.52	Used	Used	K.MAASALKEQANQTEEVEEEFKRPSR.V	[1667-1691]
	FALSE	High	[K].MAQGAKPGEGGELPGHK.[V]		4.75118e-06	5.33751e-05	1	3	11	731321657	731321657 [1090-1106]		0	1663.82	216.1	45.9	83.2		74.5	93.8	65.5	63.4	354.2	3.3		High	High	Peak Found	Not Found	Peak Found	High	Peak Found	High	High	High	High	7.23e-06	5.916e-07	3.75	9.08	Used	Used	K.MAQGAKPGEGGELPGHK.V	[1090-1106]
	FALSE	High	[K].MAQGAKPGEGGELPGHKVIGDIALTR.[N]		1.04564e-06	5.33751e-05	1	3	12	731321657	731321657 [1090-1115]		1	2602.38	284.9	84.4	0.3	91.7	500.2	18.2	4.3			16		High	High	Peak Found	High	High	Peak Found	Peak Found	Not Found	Not Found	Peak Found	High	7.23e-06	1.35e-07	3.77	22.56	Used	Used	K.MAQGAKPGEGGELPGHKVIGDIALTR.N	[1090-1115]
	FALSE	High	[K].MGHVVTVYER.[S]		0.000107254	5.33751e-05	1	3	17	731321657	731321657 [1863-1872]		0	1190.6	141.4	119.1	146.4	157.9	60.6	50.1	57.8	96.7	97.5	72.5		High	High	High	High	Peak Found	Peak Found	High	High	High	Peak Found	High	7.23e-06	1.26e-05	3.1	10.61	Used	Used	K.MGHVVTVYER.S	[1863-1872]
	FALSE	High	[K].MGHVVTVYERSDR.[I]		0.00225051	0.000222105	1	3	3	731321657	731321657 [1863-1875]		1	1548.76	59.2	9	190.6	68.9	361.6			29.8	153	127.9		High	Peak Found	Peak Found	Peak Found	Peak Found	Not Found	Not Found	Peak Found	Peak Found	Peak Found	High	3.512e-05	0.0002294	2.08	9.88	Used	Used	K.MGHVVTVYERSDR.I	[1863-1875]
	FALSE	High	[K].MGISTLASYK.[G]		0.000112639	5.33751e-05	1	3	18	731321657	731321657 [858-867]		0	1070.56	15.1	58.4	33	72.3	192.4	128.6	88	128	113.5	170.7		Peak Found	High	High	High	Peak Found	High	High	High	High	High	High	7.23e-06	1.323e-05	2.04	19.16	Used	Used	K.MGISTLASYK.G	[858-867]
	FALSE	High	[K].MGIYGLLAPLK.[A]		7.63686e-05	5.33751e-05	1	3	18	731321657	731321657 [581-591]		0	1175.69	8.7	27.7	109.1	149.4	246	77	26	168.7	85.3	102.2		Peak Found	High	High	High	High	High	Peak Found	High	High	High	High	7.23e-06	8.988e-06	2.97	60.4	Used	Used	K.MGIYGLLAPLK.A	[581-591]
	FALSE	High	[K].MGIYGLLAPLK.[A]	1xOxidation [M1]	0.010786	0.000853352	1	3	1	731321657	731321657 [581-591]		0	1191.68		278.5		721.5								Not Found	Peak Found	Not Found	High	Not Found	Not Found	Not Found	Not Found	Not Found	Not Found	High	0.0001163	0.001109	1.54	62.4	Used	Used	K.MGIYGLLAPLK.A	[581-591]
	FALSE	High	[R].MKDWKEVMDER.[R]		5.33503e-06	5.33751e-05	1	3	15	731321657	731321657 [1718-1728]		2	1466.68	57.8	25.5		321.1	241.1	155.6	54.6	37.7	34.1	72.3		Peak Found	High	Not Found	High	High	High	High	High	High	High	High	7.23e-06	6.628e-07	3.38	18.61	Used	Used	R.MKDWKEVMDER.R	[1718-1728]
	FALSE	High	[K].NAGLPWELGLAETHQTLVANDLR.[G]		1.22476e-09	5.33751e-05	1	3	37	731321657	731321657 [1198-1220]		0	2518.3	71.6	108.9	97	149.9	45.3	126.6	78.4	157.1	71.9	93.3		High	High	High	High	High	High	High	High	High	High	High	7.23e-06	1.883e-10	4.19	62.35	Used	Used	K.NAGLPWELGLAETHQTLVANDLR.G	[1198-1220]
	FALSE	High	[K].NAGLPWELGLAETHQTLVANDLRGR.[T]		9.72394e-08	5.33751e-05	1	3	11	731321657	731321657 [1198-1222]		1	2731.43	5	286.8		411.5	98	62.3	19.6	55.5	13.9	47.3		Peak Found	High	Not Found	High	High	Peak Found	High	Peak Found	High	High	High	7.23e-06	1.339e-08	5.71	53.19	Used	Used	K.NAGLPWELGLAETHQTLVANDLRGR.T	[1198-1222]
	FALSE	High	[R].NFAAGMSGGVAYIFDVDGKFHLR.[C]		5.56641e-08	5.33751e-05	1	3	7	731321657	731321657 [1545-1567]		1	2472.21	145.6	266.1	89.5	147.9			88.3	147.9	71.2	43.3		High	Peak Found	Peak Found	High	Not Found	Not Found	Peak Found	High	Peak Found	Peak Found	High	7.23e-06	7.749e-09	4.59	67.66	Used	Used	R.NFAAGMSGGVAYIFDVDGKFHLR.C	[1545-1567]
	FALSE	High	[R].NFAAGMSGGVAYIFDVDGKFHLR.[C]	1xOxidation [M6]	7.09826e-05	5.33751e-05	1	3	1	731321657	731321657 [1545-1567]		1	2488.21	96.4					244.5				659		Peak Found	Not Found	Not Found	Not Found	Not Found	Peak Found	Not Found	Not Found	Not Found	High	High	7.23e-06	8.358e-06	2.61	55.23	Used	Used	R.NFAAGMSGGVAYIFDVDGKFHLR.C	[1545-1567]
	FALSE	High	[R].NLDEMVGR.[S]		0.0545502	0.00311892	1	3	3	731321657	731321657 [1315-1322]		0	933.446	0.7	36	65	23.7	57.8	356.5	164.4		58.4	237.4		Peak Found	Peak Found	Peak Found	Peak Found	Peak Found	High	Peak Found	Not Found	High	High	High	0.0004523	0.005642	1.36	13.8	Used	Used	R.NLDEMVGR.S	[1315-1322]
	FALSE	High	[R].NLDEMVGRSDMLEVDEEVTSSNEKLK.[N]		0.000138411	9.51359e-05	1	3	2	731321657	731321657 [1315-1340]		2	2967.39	360.4	215.1		174.4		74.8	38.4	46.4	13.4	77.2		Peak Found	High	Not Found	High	Not Found	Peak Found	Peak Found	Peak Found	Peak Found	Peak Found	High	1.364e-05	1.622e-05	4.11	44.84	Used	Used	R.NLDEMVGRSDMLEVDEEVTSSNEKLK.N	[1315-1340]
	FALSE	High	[K].NIDLSLLLRPASTIRPGAAQR.[C]		0.000323765	0.000126394	1	3	14	731321657	731321657 [1341-1361]		0	2262.3	54	164.7	359.6	131.1	13.4	60.2	72.8	46.4	55.3	42.6		High	High	High	High	High	High	High	High	High	High	High	1.859e-05	3.638e-05	2.85	107.21	Used	Used	K.NIDLSLLLRPASTIRPGAAQR.C	[1341-1361]
	FALSE	High	[R].NSTAGVGLISPPPHHDIYSIEDLAQLIHDLK.[N]		1.02818e-07	5.33751e-05	1	3	14	731321657	731321657 [1116-1146]		0	3350.74	42.6	52.3	129.7	39.3	314.3	159.4	140.6	26.7	23.9	71.2		High	High	High	High	Peak Found	High	High	Peak Found	High	High	High	7.23e-06	1.413e-08	4.53	102.42	Used	Used	R.NSTAGVGLISPPPHHDIYSIEDLAQLIHDLK.N	[1116-1146]
	FALSE	High	[R].NSTAGVGLISPPPHHDIYSIEDLAQLIHDLKNSNPAAR.[V]		0.0149815	0.000935615	1	3	1	731321657	731321657 [1116-1153]		1	4061.08	118.6						171.3		530.6	179.6		High	Not Found	Not Found	Not Found	Not Found	Not Found	Peak Found	Not Found	Peak Found	Peak Found	High	0.0001355	0.001541	1.74	79.4	Used	Used	R.NSTAGVGLISPPPHHDIYSIEDLAQLIHDLKNSNPAAR.V	[1116-1153]
	FALSE	High	[K].NTCPVGIATQDPVLR.[A]	1xCarbamidomethyl [C3]	5.85315e-06	5.33751e-05	1	3	15	731321657	731321657 [1269-1283]		0	1640.84	80	117.1	11	76.9	44.6	182.1	109.5	81.8	113.9	183		Peak Found	High	High	High	Peak Found	High	High	High	High	High	High	7.23e-06	7.245e-07	2.85	26.1	Used	Used	K.NTCPVGIATQDPVLR.A	[1269-1283]
	FALSE	High	[R].QAASQVDRYLMGEEEVAVGSEVEDAVGK.[R]		6.82719e-05	5.33751e-05	1	3	1	731321657	731321657 [2170-2197]		1	2966.4		311.5		109.4				47.6	242.4	289.2		Not Found	High	Not Found	Peak Found	Not Found	Not Found	Not Found	Peak Found	Peak Found	Peak Found	High	7.23e-06	8.047e-06	2.38	58.82	Used	Used	R.QAASQVDRYLMGEEEVAVGSEVEDAVGK.R	[2170-2197]
	FALSE	High	[R].QAASQVDRYLMGEEEVAVGSEVEDAVGKR.[Q]		4.74453e-10	5.33751e-05	1	3	12	731321657	731321657 [2170-2198]		2	3122.51	3.6	181.4		345.5	193.3	76.1	22.5	88.9	67.4	21.4		High	High	Not Found	High	High	High	High	High	High	Peak Found	High	7.23e-06	7.461e-11	6.09	52.98	Used	Used	R.QAASQVDRYLMGEEEVAVGSEVEDAVGKR.Q	[2170-2198]
	FALSE	High	[K].QDHGLDMALDQELIELSK.[A]		3.73889e-05	5.33751e-05	1	3	4	731321657	731321657 [1366-1383]		0	2055.01	75.6	113.4	43.3	117.7	68.5	208.4	62.4	167.4	77.7	65.6		Peak Found	Peak Found	Peak Found	High	High	High	Peak Found	Peak Found	High	Peak Found	High	7.23e-06	4.449e-06	5.38	62.14	Used	Used	K.QDHGLDMALDQELIELSK.A	[1366-1383]
	FALSE	High	[R].QKIVLKDIVDSVAQTK.[R]		0.00311896	0.000258781	1	3	1	731321657	731321657 [544-559]		2	1785.05			24.7	889.2	86.1							Not Found	Not Found	Peak Found	High	Peak Found	Not Found	Not Found	Not Found	Not Found	Not Found	High	4.122e-05	0.0003146	1.7	27.11	Used	Used	R.QKIVLKDIVDSVAQTK.R	[544-559]
	FALSE	High	[K].QMFAQVTNPPIDPIREK.[I]		1.23031e-06	5.33751e-05	1	3	23	731321657	731321657 [640-656]		1	1984.03	174.1	158.5	83.3	128	66.3	103.5	80.1	50.1	87	69.1		High	High	High	High	High	High	High	High	High	High	High	7.23e-06	1.588e-07	3.86	33.28	Used	Used	K.QMFAQVTNPPIDPIREK.I	[640-656]
	FALSE	High	[K].QYSLARPYGDWLKR.[Q]		1.26097e-05	5.33751e-05	1	3	33	731321657	731321657 [530-543]		1	1752.92	33.9	184.2	136.9	38.9	46.6	234.1	79.1	71.4	68.7	106.2		High	High	High	High	High	High	High	High	Peak Found	High	High	7.23e-06	1.536e-06	3.44	30.3	Used	Used	K.QYSLARPYGDWLKR.Q	[530-543]
	FALSE	High	[R].RALPIGSAESVALPNPGDYHWR.[K]		6.46878e-09	5.33751e-05	1	3	29	731321657	731321657 [916-937]		1	2406.23	143.3	119.1	188.3	68.8	28.5	209.6	71.7	54.6	94	22.2		High	High	High	High	High	High	High	High	High	High	High	7.23e-06	9.518e-10	4.7	41.62	Used	Used	R.RALPIGSAESVALPNPGDYHWR.K	[916-937]
	FALSE	High	[R].RGQSLVVWAISEGR.[Q]		1.04564e-06	5.33751e-05	1	3	33	731321657	731321657 [2156-2169]		1	1557.85	23.5	74.8	20.2	187.2	103.3	34.8	42.7	201.3	173	139.2		High	High	High	High	High	High	High	High	High	High	High	7.23e-06	1.351e-07	3.94	33.17	Used	Used	R.RGQSLVVWAISEGR.Q	[2156-2169]
	FALSE	High	[K].SALLTEPVVEQVFLTPTPR.[S]		2.06489e-07	5.33751e-05	1	1	54	731321657	731321657 [232-250]		0	2097.16	228.4	189.6	1.3	87.3	75.8	52.2	55.5	130.1	102	77.8		High	High	Peak Found	High	High	High	High	High	High	High	High	7.23e-06	2.79e-08	2.41	67.81	Used	Used	K.SALLTEPVVEQVFLTPTPR.S	[232-250]
	FALSE	High	[R].SDMLEVDEEVTSSNEK.[L]		4.37445e-05	5.33751e-05	1	3	1	731321657	731321657 [1323-1338]		0	1811.79		300.7		76.7	90.8	13.2	57.3	289.4	171.9			Not Found	Peak Found	Not Found	Peak Found	Peak Found	Peak Found	Peak Found	Peak Found	High	Not Found	High	7.23e-06	5.193e-06	0.87	27.7	Used	Used	R.SDMLEVDEEVTSSNEK.L	[1323-1338]
	FALSE	High	[R].SDMLEVDEEVTSSNEKLK.[N]		2.12888e-05	5.33751e-05	1	3	4	731321657	731321657 [1323-1340]		1	2052.96		285.4	231		105.5	125.6	109.1		143.5			Not Found	High	High	Not Found	Peak Found	High	Peak Found	Not Found	High	Not Found	High	7.23e-06	2.557e-06	2.4	25.95	Used	Used	R.SDMLEVDEEVTSSNEKLK.N	[1323-1340]
	FALSE	High	[R].SDRIGGLMMYGVPNMK.[T]		0.000432438	0.000126394	1	3	5	731321657	731321657 [1873-1888]		1	1768.85	288.8	175.9	49.5	245.7	54.2	7.8	6.9	56.8	51.2	63.1		High	Peak Found	Peak Found	High	Peak Found	Peak Found	Peak Found	Peak Found	Peak Found	Peak Found	High	1.859e-05	4.778e-05	3.11	40.69	Used	Used	R.SDRIGGLMMYGVPNMK.T	[1873-1888]
	FALSE	High	[K].SGCPLGNKIPEFNELVYQNR.[W]	1xCarbamidomethyl [C3]	0.000237988	9.51359e-05	1	3	1	731321657	731321657 [1754-1773]		1	2335.15		835.4						63.4	101.2			Not Found	High	Not Found	Not Found	Not Found	Not Found	Not Found	Peak Found	Peak Found	Not Found	High	1.696e-05	2.71e-05	3.57	44.67	Used	Used	K.SGCPLGNKIPEFNELVYQNR.W	[1754-1773]
	FALSE	High	[R].SKVIDITYPK.[T]		0.00038276	0.000126394	1	3	6	731321657	731321657 [707-716]		1	1163.67	662	87.4	29.3	80.6	32.3		4.2	50.8	28.5	24.9		High	Peak Found	Peak Found	High	Peak Found	Not Found	Peak Found	High	Peak Found	Peak Found	High	1.859e-05	4.255e-05	2.94	15.77	Used	Used	R.SKVIDITYPK.T	[707-716]
	FALSE	High	[K].SLLDSNLQDGK.[Y]		0.000219883	9.51359e-05	1	3	5	731321657	731321657 [1968-1978]		0	1189.61	143.7	132.1	78	32.8	6.8	190.3	93.9	80.5	89.4	152.4		Peak Found	Peak Found	Peak Found	Peak Found	Peak Found	Peak Found	High	High	High	High	High	1.696e-05	2.521e-05	2.18	20.33	Used	Used	K.SLLDSNLQDGK.Y	[1968-1978]
	FALSE	High	[K].SLLDSNLQDGKYISAK.[G]		7.98592e-07	5.33751e-05	1	3	34	731321657	731321657 [1968-1983]		1	1751.92	70.9	96.5	77	135.7	208.6	60.8	68.2	86.3	99.5	96.4		High	High	High	High	High	High	High	High	High	High	High	7.23e-06	1.04e-07	4.11	26.77	Used	Used	K.SLLDSNLQDGKYISAK.G	[1968-1983]
	FALSE	High	[K].SIPEAVMMLIPEAWQNDK.[N]		0.00743282	0.000524579	1	3	1	731321657	731321657 [411-428]		0	2072.02		141.7	194.3	175.4		151.5	186.2		126	24.9		Not Found	Peak Found	Peak Found	Peak Found	Not Found	Peak Found	Peak Found	Not Found	High	Peak Found	High	7.574e-05	0.0007529	1.81	93.9	Used	Used	K.SIPEAVMMLIPEAWQNDK.N	[411-428]
	FALSE	High	[K].SIPEAVMMLIPEAWQNDKNMDPQRR.[A]		0.000450144	0.000126394	1	3	12	731321657	731321657 [411-435]		2	2969.44	91.2	80.9		154.3	279.2	13.7	146.7	71.2	122.5	40.2		High	High	Not Found	High	Peak Found	Peak Found	High	Peak Found	Peak Found	High	High	1.859e-05	4.963e-05	2.42	71.46	Used	Used	K.SIPEAVMMLIPEAWQNDKNMDPQRR.A	[411-435]
	FALSE	High	[R].SNFKAEYGR.[Y]		0.0183945	0.001191	1	3	2	731321657	731321657 [2132-2140]		1	1071.52	10.7	8.1		961.2	11	2.3		4.6	2.2			High	Peak Found	Not Found	Peak Found	Peak Found	Peak Found	Not Found	High	Peak Found	Not Found	High	0.0001805	0.001904	2.55	10.38	Used	Used	R.SNFKAEYGR.Y	[2132-2140]
	FALSE	High	[K].SNTGEGGENPSRLER.[L]		0.000348369	0.000126394	1	3	7	731321657	731321657 [1038-1052]		1	1602.75	44.1	17	58		66.5	337.2	176.4	77.7	164.1	59		Peak Found	High	Peak Found	Not Found	Peak Found	High	High	High	High	Peak Found	High	1.859e-05	3.889e-05	2.39	8.72	Used	Used	K.SNTGEGGENPSRLER.L	[1038-1052]
	FALSE	High	[K].SNTGEGGENPSRLERLPDGSMNPK.[R]		0.0920745	0.00464979	1	3	2	731321657	731321657 [1038-1061]		2	2542.2	719.4		65				4.9	210.7				High	Not Found	Peak Found	Not Found	Not Found	Not Found	Peak Found	High	Not Found	Not Found	High	0.0006707	0.009972	1.29	16.45	Used	Used	K.SNTGEGGENPSRLERLPDGSMNPK.R	[1038-1061]
	FALSE	High	[R].SYEVLTK.[R]		0.042765	0.00240248	1	3	2	731321657	731321657 [2056-2062]		0	839.451				2.5		327.9	178		244.1	247.4		Not Found	Not Found	Not Found	Peak Found	Not Found	Peak Found	High	Not Found	High	Peak Found	High	0.0003598	0.004384	2.05	10.86	Used	Used	R.SYEVLTK.R	[2056-2062]
	FALSE	High	[R].SYEVLTKR.[F]		0.0240508	0.00150095	1	3	4	731321657	731321657 [2056-2063]		1	995.552	144.8	110.5	100.8	15.2	29.6	142.9	194.7	100.3	148.4	12.8		High	High	Peak Found	High	Peak Found	Peak Found	High	Peak Found	Peak Found	Peak Found	High	0.0002233	0.00247	2.2	9.73	Used	Used	R.SYEVLTKR.F	[2056-2063]
	FALSE	High	[K].TIECAIIDK.[A]	1xCarbamidomethyl [C4]	0.00615998	0.000491899	1	3	2	731321657	731321657 [1816-1824]		0	1062.55	1.2	30.6	121		7.6	167.9	237.2	66.7	162.2	205.6		Peak Found	Peak Found	Peak Found	Not Found	Peak Found	High	Peak Found	High	Peak Found	Peak Found	High	6.94e-05	0.0006226	1.39	13.63	Used	Used	K.TIECAIIDK.A	[1816-1824]
	FALSE	High	[K].TIECAIIDKAYEEGWMVPRPPQNR.[T]	1xCarbamidomethyl [C4]	7.83884e-07	5.33751e-05	1	3	42	731321657	731321657 [1816-1839]		1	2873.41	10	68.2	206.7	217.6	81.1	93.3	85.9	67.6	62.1	107.4		Peak Found	High	High	High	High	High	High	High	High	High	High	7.23e-06	1.021e-07	5.35	107.55	Used	Used	K.TIECAIIDKAYEEGWMVPRPPQNR.T	[1816-1839]
	FALSE	High	[K].TIECAIIDKAYEEGWMVPRPPQNR.[T]	1xCarbamidomethyl [C4]; 1xOxidation [M16]	9.75536e-05	5.33751e-05	1	3	1	731321657	731321657 [1816-1839]		1	2889.4				528.9						471.1		Not Found	Not Found	Not Found	Peak Found	Not Found	Not Found	Not Found	Not Found	Not Found	High	High	7.23e-06	1.146e-05	3.11	51.29	Used	Used	K.TIECAIIDKAYEEGWMVPRPPQNR.T	[1816-1839]
	FALSE	High	[K].TLELVR.[V]		0.0682826	0.00357702	1	3	8	731321657	731321657 [2074-2079]		0	730.446	55.6	72.4	182	17	22.4	110.9	115.8	64.9	180.7	178.4		High	High	High	High	Peak Found	Peak Found	High	Peak Found	High	High	High	0.0005199	0.007134	1.56	12.52	Used	Used	K.TLELVR.V	[2074-2079]
	FALSE	High	[K].TNSVGAYKEYSNR.[I]		5.26135e-06	5.33751e-05	1	3	23	731321657	731321657 [959-971]		1	1488.71	48.3	44.1	171.5	114.4	106.4	144.1	142.1	78.9	127.3	23		Peak Found	High	High	High	High	High	High	High	High	High	High	7.23e-06	6.552e-07	3.87	9.59	Used	Used	K.TNSVGAYKEYSNR.I	[959-971]
	FALSE	High	[K].TNSVGAYKEYSNRINELNK.[S]		5.27252e-05	5.33751e-05	1	3	7	731321657	731321657 [959-977]		2	2200.1	308.8	101.4	12.3	227.6	254.1	12	21.7	9.7	33.3	19.2		High	High	Peak Found	High	High	Peak Found	Peak Found	Peak Found	Peak Found	Peak Found	High	7.23e-06	6.237e-06	3.68	13.67	Used	Used	K.TNSVGAYKEYSNRINELNK.S	[959-977]
	FALSE	High	[R].TVLQTDGQLK.[T]		0.0015181	0.000154279	1	3	12	731321657	731321657 [1223-1232]		0	1102.61	14.6	64	139.2	13.3	55.7	173.4	155	96.8	121.6	166.5		High	High	High	High	High	Peak Found	Peak Found	High	High	High	High	2.424e-05	0.0001569	2.02	11.17	Used	Used	R.TVLQTDGQLK.T	[1223-1232]
	FALSE	High	[R].TVLQTDGQLKTGR.[D]		2.99623e-05	5.33751e-05	1	3	14	731321657	731321657 [1223-1235]		1	1416.78	217.9	320.8	68.7	66.6	17.2	39.9	37	73.5	103.3	54.8		High	High	Peak Found	Peak Found	Peak Found	Peak Found	Peak Found	High	High	High	High	7.23e-06	3.584e-06	2.94	10.8	Used	Used	R.TVLQTDGQLKTGR.D	[1223-1235]
	FALSE	High	[R].TVPTDNSGLGK.[S]		0.000230165	9.51359e-05	1	1	13	731321657	731321657 [221-231]		0	1088.56	21.7	45.2	106.4	3.1	12.2	151.1	187.5	43.2	133.4	296		High	High	High	Peak Found	Peak Found	High	High	High	High	Peak Found	High	1.696e-05	2.63e-05	1.99	10.78	Used	Used	R.TVPTDNSGLGK.S	[221-231]
	FALSE	High	[K].TVTDAVEMLVR.[M]		6.94649e-05	5.33751e-05	1	1	25	731321657	731321657 [129-139]		0	1233.65	151.7	97.6	68	151.2	108.8	201.1	51.2	56.7	42.7	71.1		High	High	High	High	High	High	High	Peak Found	High	High	High	7.23e-06	8.202e-06	1.55	46.71	Used	Used	K.TVTDAVEMLVR.M	[129-139]
	FALSE	High	[K].TVTDAVEMLVR.[M]	1xOxidation [M8]	0.00068245	0.000154279	1	1	1	731321657	731321657 [129-139]		0	1249.65		12.6	31.3	346.5	604.4				5.2			Not Found	Peak Found	Peak Found	Peak Found	High	Not Found	Not Found	Not Found	Peak Found	Not Found	High	2.258e-05	7.386e-05	1.13	37.28	Used	Used	K.TVTDAVEMLVR.M	[129-139]
	FALSE	High	[K].VAESLGHTVLGWR.[T]		2.8387e-06	5.33751e-05	1	1	66	731321657	731321657 [208-220]		0	1424.76	153.8	161.1	43.2	98.1	81.4	105.6	99.1	113.6	78	66.1		High	High	High	High	High	High	High	High	High	High	High	7.23e-06	3.584e-07	4.11	29.36	Used	Used	K.VAESLGHTVLGWR.T	[208-220]
	FALSE	High	[R].VAVSSLLAVGAVHQHLVK.[T]		6.04252e-07	5.33751e-05	1	3	38	731321657	731321657 [757-774]		0	1828.08	20.1	99.5	163.5	306.1	65.4	68.1	71.5	124.4	52.3	29		High	High	High	High	High	High	High	High	High	High	High	7.23e-06	7.932e-08	3.17	28.1	Used	Used	R.VAVSSLLAVGAVHQHLVK.T	[757-774]
	FALSE	High	[K].VAVVGSGPSGLAAADQLNK.[M]		3.08443e-08	5.33751e-05	1	3	26	731321657	731321657 [1844-1862]		0	1753.94	101.5	172.2	7.4	57.4	72.7	141.3	95.8	63.3	118	170.2		High	High	High	High	High	High	High	High	High	High	High	7.23e-06	4.358e-09	3.4	25.86	Used	Used	K.VAVVGSGPSGLAAADQLNK.M	[1844-1862]
	FALSE	High	[K].VAVVGSGPSGLAAADQLNKMGHVVTVYER.[S]		3.78524e-06	5.33751e-05	1	3	1	731321657	731321657 [1844-1872]		1	2925.53				1000								Not Found	Not Found	Not Found	High	Not Found	Not Found	Not Found	Not Found	Not Found	Not Found	High	7.23e-06	4.747e-07	3.99	44.57	Used	Used	K.VAVVGSGPSGLAAADQLNKMGHVVTVYER.S	[1844-1872]
	FALSE	High	[R].VCPAPCEGSCVLGIIENPVSIK.[T]	3xCarbamidomethyl [C2; C6; C10]	3.76112e-07	5.33751e-05	1	3	15	731321657	731321657 [1794-1815]		0	2399.18	66.7	242.5	3.3	125	162.8	67	43	83.1	116.7	89.8		Peak Found	High	Peak Found	High	High	High	Peak Found	High	High	High	High	7.23e-06	4.999e-08	3.85	59.87	Used	Used	R.VCPAPCEGSCVLGIIENPVSIK.T	[1794-1815]
	FALSE	High	[R].VEGATFEMLASDALK.[L]		9.5284e-07	5.33751e-05	1	3	18	731321657	731321657 [893-907]		0	1581.78	64.4	82.5	112.5	59.3	234.7	157.3	159.5	80	20.9	28.8		High	High	High	High	High	High	High	High	High	Peak Found	High	7.23e-06	1.239e-07	2.92	51.35	Used	Used	R.VEGATFEMLASDALK.L	[893-907]
	FALSE	High	[R].VEGATFEMLASDALK.[L]	1xOxidation [M8]	0.00031941	0.000126394	1	3	1	731321657	731321657 [893-907]		0	1597.78				448	179.7					372.3		Not Found	Not Found	Not Found	Peak Found	Peak Found	Not Found	Not Found	Not Found	Not Found	High	High	1.859e-05	3.588e-05	1.42	47.7	Used	Used	R.VEGATFEMLASDALK.L	[893-907]
	FALSE	High	[R].VEGATFEMLASDALKLHEMAFPR.[R]		4.73757e-09	5.33751e-05	1	3	12	731321657	731321657 [893-915]		1	2563.27	134.8	69.5	260.5	97.4	52.3	33.8	296.9		37.7	17		High	High	High	High	High	High	High	Not Found	Peak Found	High	High	7.23e-06	7.023e-10	6.14	102.22	Used	Used	R.VEGATFEMLASDALKLHEMAFPR.R	[893-915]
	FALSE	High	[R].VFRVDYGHQEAAAK.[F]		3.32401e-06	5.33751e-05	1	3	21	731321657	731321657 [2036-2049]		1	1590.8	224.6	81	40.3	295.8	110.3	28.1	44.4	76.9	43.7	55		High	High	High	High	High	Peak Found	High	High	High	High	High	7.23e-06	4.187e-07	5.21	9.59	Used	Used	R.VFRVDYGHQEAAAK.F	[2036-2049]
	FALSE	High	[R].VGLIIESAEPR.[E]		3.7221e-05	5.33751e-05	1	3	25	731321657	731321657 [781-791]		0	1183.67	59.1	119.5	38.4	68.4	91.8	127.1	102.9	99.7	118.4	174.6		High	High	High	High	High	High	High	High	High	High	High	7.23e-06	4.431e-06	2.91	26.43	Used	Used	R.VGLIIESAEPR.E	[781-791]
	FALSE	High	[K].VIDITYPK.[T]		0.000851943	0.000154279	1	3	6	731321657	731321657 [709-716]		0	948.54	309.2		9.9	107.1	79.1	118.7	35.7	83.3	144.5	112.5		High	Not Found	High	Peak Found	Peak Found	High	Peak Found	High	High	Peak Found	High	2.424e-05	9.076e-05	1.66	17.3	Used	Used	K.VIDITYPK.T	[709-716]
	FALSE	High	[K].VIGDIALTR.[N]		0.0001587	9.51359e-05	1	3	27	731321657	731321657 [1107-1115]		0	957.573	129.8	125.5	34.3	66.2	122.1	91.2	65.2	74.8	119.8	171.1		High	High	High	High	High	High	High	High	High	High	High	1.696e-05	1.848e-05	1.87	22.98	Used	Used	K.VIGDIALTR.N	[1107-1115]
	FALSE	High	[R].VLGHNGEINTLR.[G]		2.19813e-05	5.33751e-05	1	3	19	731321657	731321657 [345-356]		0	1322.72	158.6	116.7		159.9	21.5	80.9	63.5	81.8	145.3	171.7		High	High	Not Found	High	High	High	High	High	High	High	High	7.23e-06	2.646e-06	2.37	11.07	Used	Used	R.VLGHNGEINTLR.G	[345-356]
	FALSE	High	[R].VIMASEVGVVDIPPEDVSK.[K]		0.0278867	0.00171567	1	3	1	731321657	731321657 [484-502]		0	1984.03		880.2	20.2							99.6		Not Found	High	Peak Found	Not Found	Not Found	Not Found	Not Found	Not Found	Not Found	Peak Found	High	0.0002486	0.002865	1.1	41.42	Used	Used	R.VIMASEVGVVDIPPEDVSK.K	[484-502]
	FALSE	High	[R].VNLMAEEGINFVVNANVGKDPLYSLDR.[L]		1.37368e-08	5.33751e-05	1	3	2	731321657	731321657 [1899-1925]		1	2977.51	119.9	168.2	549.9			26.8	60.6	58.3		16.3		High	High	Peak Found	Not Found	Not Found	Peak Found	Peak Found	Peak Found	Not Found	Peak Found	High	7.23e-06	1.986e-09	3.8	107.28	Used	Used	R.VNLMAEEGINFVVNANVGKDPLYSLDR.L	[1899-1925]
	FALSE	High	[K].VVVIGGGDTGTDCIGTSIR.[H]	1xCarbamidomethyl [C13]	6.64192e-08	5.33751e-05	1	3	15	731321657	731321657 [1987-2005]		0	1876.94	36.6	223.9	44	52.2	55.8	144.5	143.9	110.9	70.7	117.5		High	High	High	High	High	High	Peak Found	Peak Found	High	High	High	7.23e-06	9.229e-09	3.58	29.84	Used	Used	K.VVVIGGGDTGTDCIGTSIR.H	[1987-2005]
	FALSE	High	[R].WREALDRLLETNNFPEFTGR.[V]		2.17813e-05	5.33751e-05	1	3	10	731321657	731321657 [1774-1793]		2	2464.24	299.3	45.9	157.4	165.7	4.6	51.6	151.9	11.6	101.5	10.5		High	High	Peak Found	High	Peak Found	Peak Found	High	Peak Found	Peak Found	Peak Found	High	7.23e-06	2.623e-06	3.47	59.26	Used	Used	R.WREALDRLLETNNFPEFTGR.V	[1774-1793]
	FALSE	High	[R].WTGIKNAGLPWELGLAETHQTLVANDLRGR.[T]		5.99033e-06	5.33751e-05	1	3	3	731321657	731321657 [1193-1222]		2	3316.75	865	38.4		63.5				11.5	15.1	6.6		High	Peak Found	Not Found	High	Not Found	Not Found	Not Found	Peak Found	Peak Found	Peak Found	High	7.23e-06	7.412e-07	8.02	59.78	Used	Used	R.WTGIKNAGLPWELGLAETHQTLVANDLRGR.T	[1193-1222]
	FALSE	High	[R].YHLQGLPTDSIHIK.[F]		9.91847e-05	5.33751e-05	1	3	27	731321657	731321657 [1417-1430]		0	1621.87	37.6	135.7	62.8	23.5	248.8	128.8	188	23.1	88.4	63.4		High	High	High	High	High	High	High	High	High	High	High	7.23e-06	1.167e-05	2.46	99.3	Used	Used	R.YHLQGLPTDSIHIK.F	[1417-1430]
	FALSE	High	[R].YLGATLDR.[N]		0.0119261	0.000882483	1	3	3	731321657	731321657 [461-468]		0	908.484			55	63.1	47.6	283.2	297.7	42.1	167.7	43.6		Not Found	Not Found	Peak Found	High	Peak Found	High	Peak Found	Peak Found	Peak Found	High	High	0.000128	0.001225	1.7	12.54	Used	Used	R.YLGATLDR.N	[461-468]
	FALSE	High	[R].YLMGEEEVAVGSEVEDAVGKR.[Q]		2.6581e-08	5.33751e-05	1	3	22	731321657	731321657 [2178-2198]		1	2267.09	2	94.8	17.1	179.9	131.9	81.9	81.5	148.3	108.2	154.4		Peak Found	High	Peak Found	High	High	High	High	High	High	High	High	7.23e-06	3.775e-09	4.76	49.73	Used	Used	R.YLMGEEEVAVGSEVEDAVGKR.Q	[2178-2198]
	FALSE	High	[R].YLMGEEEVAVGSEVEDAVGKR.[Q]	1xOxidation [M3]	0.000786653	0.000154279	1	3	1	731321657	731321657 [2178-2198]		1	2283.08				864.8	135.2							Not Found	Not Found	Not Found	Peak Found	High	Not Found	Not Found	Not Found	Not Found	Not Found	High	2.258e-05	8.41e-05	1.22	43.35	Used	Used	R.YLMGEEEVAVGSEVEDAVGKR.Q	[2178-2198]
	FALSE	High	[R].YSTNVEGVFAAGDCR.[R]	1xCarbamidomethyl [C14]	7.14302e-06	5.33751e-05	1	3	11	731321657	731321657 [2141-2155]		0	1645.73		157.1	13.9	93.2	81.6	99	125.3	201.7	92.4	135.8		Not Found	High	Peak Found	Peak Found	Peak Found	High	High	High	High	High	High	7.23e-06	8.826e-07	2.42	29.15	Used	Used	R.YSTNVEGVFAAGDCR.R	[2141-2155]
	FALSE	High	[R].YSTNVEGVFAAGDCRR.[G]	1xCarbamidomethyl [C14]	3.5742e-05	5.33751e-05	1	3	24	731321657	731321657 [2141-2156]		1	1801.83		198.5	88.6	45.5	141.4	111.9	80.1	84.9	112.1	137		Not Found	High	High	High	High	Peak Found	High	High	High	High	High	7.23e-06	4.256e-06	2.65	23.08	Used	Used	R.YSTNVEGVFAAGDCRR.G	[2141-2156]
FALSE		High	Master Protein	-2809488159963032852	1643	731362937	PREDICTED: elongation factor 2 [Beta vulgaris subsp. vulgaris]	MVKFTADELRAIMDCKHNIRNMSVIAHVDHGKSTLTDSLVAAAGIIAQEVAGDVRMTDTRADEAERGITIKSTGISLYYQMTDEALQSYKGERKGNDYLINLIDSPGHVDFSSEVTAALRITDGALVVVDCIEGVCVQTETVLRQALGERIRPVLTVNKMDRCFLELQVDGEEAYTTFQKVIENANVIMATYEDPLLGDVQVYPEKGTVAFSAGLHGWAFTLSNFAKMYASKFGVDESKMMERLWGENFFDPATKKWTTKNSGNASCKRGFVQFCYEPIKQIIATCMNDQKDKLWPMLTKLGIQMKTEEKDLMGKALMKRVMQTWLPASSALLEMMIHHLPSPATAQRYRVENLYEGPMDDVYATAIRNCDPEGPLMLYVSKMIPASDKGRFFAFGRVF…	>gi|731362937|ref|XP_010693156.1| PREDICTED: elongation factor 2 [Beta vulgaris subsp. vulgaris]	0	1149.28	88	83	4358	2	83	843	93.8	6.25	11608.3	88	4358	83	0	101.9	92.2	88.2	104.4	126.3	87.4	104.8	97.4	103.2	94.2	3.59758e+09	6.61653e+09	3.91199e+09	3.80816e+09	1.76546e+09	5.15989e+09	3.17324e+09	4.15281e+09	5.39679e+09	4.74105e+09	7.31123e+09	6.61653e+09	6.3267e+09	7.48805e+09	9.05726e+09
	Checked	Confidence	Annotated Sequence	Modifications	Qvality PEP	Qvality q-value	# Protein Groups	# Proteins	# PSMs	Master Protein Accessions	Positions in Master Proteins	Modifications in Master Proteins	# Missed Cleavages	Theo. MH+ [Da]	Abundances (Scaled): F1: Control	Abundances (Scaled): F2: Control	Abundances (Scaled): F3: Control	Abundances (Scaled): F4: Control	Abundances (Scaled): F5: Control	Abundances (Scaled): F6: Sample	Abundances (Scaled): F7: Sample	Abundances (Scaled): F8: Sample	Abundances (Scaled): F9: Sample	Abundances (Scaled): F10: Sample	Quan Info	Found in Sample: [S1] F1: Control	Found in Sample: [S2] F2: Control	Found in Sample: [S3] F3: Control	Found in Sample: [S4] F4: Control	Found in Sample: [S5] F5: Control	Found in Sample: [S6] F6: Sample	Found in Sample: [S7] F7: Sample	Found in Sample: [S8] F8: Sample	Found in Sample: [S9] F9: Sample	Found in Sample: [S10] F10: Sample	Confidence (by Search Engine): Sequest HT	Percolator q-Value (by Search Engine): Sequest HT	Percolator PEP (by Search Engine): Sequest HT	XCorr (by Search Engine): Sequest HT	Top Apex RT [min]	Quan Usage	Quan Ratio Usage	Sequence in Protein	Positions in Proteins
	FALSE	High	[R].ADEAERGITIK.[S]		0.000542985	0.000126394	1	2	2	731362937	731362937 [61-71]		1	1202.64	62.1		54.3	152.6	61.7	85.9	237.1	76.9	77	192.3		Peak Found	Not Found	Peak Found	Peak Found	Peak Found	High	Peak Found	Peak Found	High	Peak Found	High	1.859e-05	5.916e-05	1.71	11.13	Used	Used	R.ADEAERGITIK.S	[61-71]
	FALSE	High	[R].AIMDCKHNIR.[N]	1xCarbamidomethyl [C5]	3.37052e-05	5.33751e-05	1	2	7	731362937	731362937 [11-20]		1	1257.62	244.6	23.9	53	6.8	16.4	3.3	237.4	272.2	137.6	4.8		High	High	Peak Found	Peak Found	Peak Found	Peak Found	High	High	High	Peak Found	High	7.23e-06	4.021e-06	2.29	9.04	Used	Used	R.AIMDCKHNIR.N	[11-20]
	FALSE	High	[R].AMKFSVSPVVR.[V]		0.00013511	9.51359e-05	1	2	13	731362937	731362937 [480-490]		1	1220.68	543.9	44.2	16.4	53.8	120.8	1	27.4	75.5	76.5	40.5		High	Peak Found	Peak Found	High	High	Peak Found	High	High	High	High	High	1.364e-05	1.586e-05	3.12	20.56	Used	Used	R.AMKFSVSPVVR.V	[480-490]
	FALSE	High	[R].AMKFSVSPVVR.[V]	1xGG [K3]	0.0875031	0.00432923	1	2	1	731362937	731362937 [480-490]		1	1334.72		351.8				106.8			188.5	352.9		Not Found	High	Not Found	Not Found	Not Found	Peak Found	Not Found	Not Found	Peak Found	Peak Found	High	0.0006307	0.009355	1.72	17.12	Used	Used	R.AMKFSVSPVVR.V	[480-490]
	FALSE	High	[R].ASTSGQAFPQCVFDHWEMMPSDPLEAGSQASTLVSVIR.[K]	1xCarbamidomethyl [C11]	5.28055e-07	5.33751e-05	1	2	89	731362937	731362937 [787-824]		0	4136.92	21.7	208.2	99.4	222.6	103.3	38.4	68	123.5	80.6	34.2		High	High	High	High	High	High	High	High	High	High	High	7.23e-06	6.947e-08	3.66	90.35	Used	Used	R.ASTSGQAFPQCVFDHWEMMPSDPLEAGSQASTLVSVIR.K	[787-824]
	FALSE	High	[R].ASTSGQAFPQCVFDHWEMMPSDPLEAGSQASTLVSVIR.[K]	1xCarbamidomethyl [C11]; 1xOxidation [M19]	0.000280989	0.000126394	1	2	1	731362937	731362937 [787-824]		0	4152.91		1000										Not Found	High	Not Found	Not Found	Not Found	Not Found	Not Found	Not Found	Not Found	Not Found	High	1.859e-05	3.174e-05	3.34	88.47	Used	Used	R.ASTSGQAFPQCVFDHWEMMPSDPLEAGSQASTLVSVIR.K	[787-824]
	FALSE	High	[R].ASTSGQAFPQCVFDHWEMMPSDPLEAGSQASTLVSVIRK.[R]	1xCarbamidomethyl [C11]	0.0114363	0.000853352	1	2	4	731362937	731362937 [787-825]		1	4265.01		297.6	62.9	370.7	126.6		142.3					Not Found	High	Peak Found	High	Peak Found	Not Found	Peak Found	Not Found	Not Found	Not Found	High	0.0001191	0.00117	2.49	80.09	Used	Used	R.ASTSGQAFPQCVFDHWEMMPSDPLEAGSQASTLVSVIRK.R	[787-825]
	FALSE	High	[K].AYLPVVESFGFSSTLR.[A]		1.75484e-07	5.33751e-05	1	2	190	731362937	731362937 [771-786]		0	1772.92	173.1	156.1	60	105.3	78	71.4	72.9	102.1	104.2	76.9		High	High	High	High	High	High	High	High	High	High	High	7.23e-06	2.372e-08	3.46	68.03	Used	Used	K.AYLPVVESFGFSSTLR.A	[771-786]
	FALSE	High	[R].CFLELQVDGEEAYTTFQK.[V]	1xCarbamidomethyl [C1]	6.20372e-09	5.33751e-05	1	2	28	731362937	731362937 [163-180]		0	2178.01	37	308.8	52.9	183.9	14.5	77.5	40.8	209.7	57.4	17.4		High	High	High	High	Peak Found	High	High	High	High	Peak Found	High	7.23e-06	9.137e-10	3.3	60.17	Used	Used	R.CFLELQVDGEEAYTTFQK.V	[163-180]
	FALSE	High	[K].DLQDDFMGGAEIIK.[S]		1.31912e-06	5.33751e-05	1	2	22	731362937	731362937 [544-557]		0	1551.74			65	75.6	52.3	79.2	64.7	351.7	218.8	92.7		Not Found	Not Found	High	High	High	High	High	High	High	High	High	7.23e-06	1.695e-07	3.26	58.55	Used	Used	K.DLQDDFMGGAEIIK.S	[544-557]
	FALSE	High	[K].DLQDDFMGGAEIIKSDPVVSFR.[E]		6.83989e-09	5.33751e-05	1	2	26	731362937	731362937 [544-565]		1	2439.19	26.7	138	107	117.4	50	173.5	196.7	60	97	33.8		High	High	High	High	High	High	High	High	High	High	High	7.23e-06	1.006e-09	4.6	100.2	Used	Used	K.DLQDDFMGGAEIIKSDPVVSFR.E	[544-565]
	FALSE	High	[K].DLQDDFMGGAEIIKSDPVVSFRETVLDR.[S]		6.48039e-05	5.33751e-05	1	2	7	731362937	731362937 [544-571]		2	3152.56	60.4	360.2	7.3	152.6	108.5	11.9	8.8	133.4	113.6	43.3		High	High	Peak Found	High	Peak Found	Peak Found	Peak Found	High	High	High	High	7.23e-06	7.66e-06	3.98	78.89	Used	Used	K.DLQDDFMGGAEIIKSDPVVSFRETVLDR.S	[544-571]
	FALSE	High	[K].DSVVAGFQWASK.[E]		0.000820958	0.000154279	1	2	2	731362937	731362937 [662-673]		0	1294.64	130.8	62.5	704.3	12.8				45.6	23.5	20.4		Peak Found	Peak Found	High	Peak Found	Not Found	Not Found	Not Found	High	Peak Found	Peak Found	High	2.424e-05	8.804e-05	1.23	34.06	Used	Used	K.DSVVAGFQWASK.E	[662-673]
	FALSE	High	[K].EGALAEENMR.[G]		3.73889e-05	5.33751e-05	1	2	22	731362937	731362937 [674-683]		0	1119.51	33.8	43.4	31	59.2	68.3	139	218.8	88.3	150.4	167.9		High	High	High	High	High	High	High	Peak Found	High	High	High	7.23e-06	4.447e-06	2.8	10.51	Used	Used	K.EGALAEENMR.G	[674-683]
	FALSE	High	[K].EQMTPLSEFEDKL.[-]		9.04929e-05	5.33751e-05	1	2	31	731362937	731362937 [831-843]		1	1566.74	123	95.6	71	105.3	166	93.2	59.1	81.8	152.3	52.7		High	High	High	High	High	Peak Found	High	High	High	High	High	7.23e-06	1.065e-05	1.9	59.4	Used	Used	K.EQMTPLSEFEDKL.-	[831-843]
	FALSE	High	[K].EQMTPLSEFEDKL.[-]	1xOxidation [M3]	0.140573	0.00676907	1	2	1	731362937	731362937 [831-843]		1	1582.73						64.6		193.7		741.7		Not Found	Not Found	Not Found	Not Found	Not Found	Peak Found	Not Found	Peak Found	Not Found	High	High	0.0009911	0.01621	1.49	48.37	Used	Used	K.EQMTPLSEFEDKL.-	[831-843]
	FALSE	High	[R].FFAFGR.[V]		0.159596	0.00761724	1	2	138	731362937	731362937 [392-397]		0	744.383	19.7	93.7	149.7	178.5	180.1	87.9	49.3	82.3	94.8	64		High	High	High	High	High	High	High	High	High	High	High	0.001124	0.01893	1.15	28.06	Used	Used	R.FFAFGR.V	[392-397]
	FALSE	High	[R].FFAFGRVFAGKVSTGMK.[V]		0.038516	0.00219431	1	2	3	731362937	731362937 [392-408]		2	1849.98	2.1	83.7	65.6	193.4	79	48.1		161.5	112.3	254.4		Peak Found	High	Peak Found	Peak Found	Peak Found	Peak Found	Not Found	High	High	Peak Found	High	0.0003267	0.003957	1.93	32.86	Used	Used	R.FFAFGRVFAGKVSTGMK.V	[392-408]
	FALSE	High	[K].FGVDESKMMER.[L]		6.85149e-06	5.33751e-05	1	2	12	731362937	731362937 [233-243]		1	1328.6	420.6	208.1		89.1	48.3	7	34	83.6	76.4	32.9		High	High	Not Found	High	Peak Found	Peak Found	High	Peak Found	High	Peak Found	High	7.23e-06	8.459e-07	2.99	17.27	Used	Used	K.FGVDESKMMER.L	[233-243]
	FALSE	High	[K].FSVSPVVR.[V]		0.00549876	0.00046303	1	2	60	731362937	731362937 [483-490]		0	890.509	126.2	65.5	52.4	71.5	69.3	98.9	135.5	86.8	161.7	132.4		High	High	High	High	High	High	High	High	High	High	High	6.022e-05	0.0005534	1.99	15.04	Used	Used	K.FSVSPVVR.V	[483-490]
	FALSE	High	[K].FTADELR.[A]		0.00171776	0.00019222	1	2	15	731362937	731362937 [4-10]		0	851.426	25.2	44.5	93.1	72	76.4	151.7	149.8	90.6	126.3	170.4		Peak Found	High	High	High	Peak Found	High	High	High	High	High	High	2.424e-05	0.0001773	1.29	12.13	Used	Used	K.FTADELR.A	[4-10]
	FALSE	High	[R].GFVQFCYEPIK.[Q]	1xCarbamidomethyl [C6]	7.70256e-05	5.33751e-05	1	2	30	731362937	731362937 [270-280]		0	1387.67	0.7	75.1	152.1	82.2	144.1	107.2	53.1	147.6	127.7	110.1		Peak Found	High	High	High	High	High	High	High	High	High	High	7.23e-06	9.07e-06	2.04	43.64	Used	Used	R.GFVQFCYEPIK.Q	[270-280]
	FALSE	High	[R].GGGQIIPTAR.[R]		0.000274972	9.51359e-05	1	2	33	731362937	731362937 [702-711]		0	969.548	16.9	16.6	10.6	25.9	46.9	158.9	242.4	80.5	192.3	208.8		Peak Found	High	High	High	High	High	High	High	High	High	High	1.696e-05	3.115e-05	2.4	11.29	Used	Used	R.GGGQIIPTAR.R	[702-711]
	FALSE	High	[R].GGGQIIPTARR.[V]		0.000323765	0.000126394	1	2	7	731362937	731362937 [702-712]		1	1125.65	159.2			8.9	25.7	11.4	387.2	129.9	254.9	22.7		High	Not Found	Not Found	Peak Found	Peak Found	Peak Found	High	High	High	Peak Found	High	1.859e-05	3.636e-05	2.68	9.7	Used	Used	R.GGGQIIPTARR.V	[702-712]
	FALSE	High	[R].GHVFEEMQRPGTPLYNIK.[A]		4.76727e-07	5.33751e-05	1	2	109	731362937	731362937 [753-770]		0	2116.06	81	76	52.9	46.8	342.7	111.9	74.6	74.1	73.9	66.1		High	High	High	High	High	High	High	High	High	High	High	7.23e-06	6.293e-08	3.66	25.56	Used	Used	R.GHVFEEMQRPGTPLYNIK.A	[753-770]
	FALSE	High	[R].GHVFEEMQRPGTPLYNIK.[A]	1xOxidation [M7]	8.93598e-05	5.33751e-05	1	2	10	731362937	731362937 [753-770]		0	2132.06	55.3	17.8		160.8	336.2	10.3	16.8	17.4	68.2	317.1		High	Peak Found	Not Found	High	High	Peak Found	High	Peak Found	Peak Found	High	High	7.23e-06	1.05e-05	2.52	13.84	Used	Used	R.GHVFEEMQRPGTPLYNIK.A	[753-770]
	FALSE	High	[K].GLKEQMTPLSEFEDKL.[-]		9.48423e-07	5.33751e-05	1	2	63	731362937	731362937 [828-843]		2	1864.94	148.9	104.9	224.7	94.1	56	36.5	73.4	98.7	86.8	76.1		High	High	High	High	High	High	High	High	High	High	High	7.23e-06	1.229e-07	4.6	51.29	Used	Used	K.GLKEQMTPLSEFEDKL.-	[828-843]
	FALSE	High	[K].GLKEQMTPLSEFEDKL.[-]	1xOxidation [M6]	0.0648449	0.003524	1	2	2	731362937	731362937 [828-843]		2	1880.93					779.7					220.3		Not Found	Not Found	Not Found	Not Found	High	Not Found	Not Found	Not Found	Not Found	High	High	0.0004994	0.006755	1.52	39.98	Used	Used	K.GLKEQMTPLSEFEDKL.-	[828-843]
	FALSE	High	[R].GITIKSTGISLYYQMTDEALQSYKGER.[K]		9.12774e-06	5.33751e-05	1	2	1	731362937	731362937 [67-93]		2	3052.53								894.5		105.5		Not Found	Not Found	Not Found	Not Found	Not Found	Not Found	Not Found	High	Not Found	Peak Found	High	7.23e-06	1.119e-06	4.3	56.28	Used	Used	R.GITIKSTGISLYYQMTDEALQSYKGER.K	[67-93]
	FALSE	High	[K].GNDYLINLIDSPGHVDFSSEVTAALR.[I]		5.38819e-08	5.33751e-05	1	2	14	731362937	731362937 [95-120]		0	2803.39	289.4	123.8	41.6	124.8	35.3	53.2	67.7	69.4	72.9	121.9		High	High	High	High	Peak Found	High	High	High	High	High	High	7.23e-06	7.505e-09	4.52	83.82	Used	Used	K.GNDYLINLIDSPGHVDFSSEVTAALR.I	[95-120]
	FALSE	High	[K].GTVAFSAGLHGWAFTLSNFAK.[M]		2.53736e-08	5.33751e-05	1	2	20	731362937	731362937 [207-227]		0	2182.11				102	11	1.3	3.8	614.2	200.5	67.3		Not Found	Not Found	Not Found	High	Peak Found	Peak Found	Peak Found	High	High	High	High	7.23e-06	3.614e-09	3.05	66.31	Used	Used	K.GTVAFSAGLHGWAFTLSNFAK.M	[207-227]
	FALSE	High	[K].GVQYLNEIK.[D]		0.00277281	0.000222105	1	2	2	731362937	731362937 [653-661]		0	1063.58		26.4	63.3	52.2	181	290.9	191.6	44.1	125	25.4		Not Found	Peak Found	High	Peak Found	Peak Found	Peak Found	High	Peak Found	Peak Found	Peak Found	High	3.769e-05	0.0002798	1.53	17.04	Used	Used	K.GVQYLNEIK.D	[653-661]
	FALSE	High	[K].GVQYLNEIKDSVVAGFQWASK.[E]		1.50274e-09	5.33751e-05	1	2	221	731362937	731362937 [653-673]		1	2339.2	21.2	80.5	209	84.9	83.6	89.8	136.8	119	89.5	85.6		High	High	High	High	High	High	High	High	High	High	High	7.23e-06	2.299e-10	5.4	78.67	Used	Used	K.GVQYLNEIKDSVVAGFQWASK.E	[653-673]
	FALSE	High	[K].GVQYLNEIKDSVVAGFQWASKEGALAEENMR.[G]		4.04396e-12	5.33751e-05	1	2	38	731362937	731362937 [653-683]		2	3439.7	174.1	93.8	9.5	212.5	215.8	1.4	73.4	82.9	73.4	63.1		High	High	Peak Found	High	High	Peak Found	High	High	High	High	High	7.23e-06	7.167e-13	5.98	107.22	Used	Used	K.GVQYLNEIKDSVVAGFQWASKEGALAEENMR.G	[653-683]
	FALSE	High	[K].GVQYLNEIKDSVVAGFQWASKEGALAEENMR.[G]	1xOxidation [M30]	0.0240508	0.00150095	1	2	1	731362937	731362937 [653-683]		2	3455.69					412.1				474.7	113.2		Not Found	Not Found	Not Found	Not Found	Peak Found	Not Found	Not Found	Not Found	High	Peak Found	High	0.0002233	0.00247	1.78	90.16	Used	Used	K.GVQYLNEIKDSVVAGFQWASKEGALAEENMR.G	[653-683]
	FALSE	High	[R].KGNDYLINLIDSPGHVDFSSEVTAALR.[I]		1.13308e-13	5.33751e-05	1	2	60	731362937	731362937 [94-120]		1	2931.48	249.9	185.1	33.9	92	49.7	107.9	76	50.9	95.2	59.4		High	High	High	High	Peak Found	High	High	High	High	High	High	7.23e-06	2.199e-14	8.06	71.22	Used	Used	R.KGNDYLINLIDSPGHVDFSSEVTAALR.I	[94-120]
	FALSE	High	[K].KIWCFGPETTGPNMVVDMCK.[G]	2xCarbamidomethyl [C4; C19]	2.77166e-08	5.33751e-05	1	2	60	731362937	731362937 [633-652]		1	2370.07	8.9	194.3	67.1	200.1	113	64.5	93.1	102.2	109.5	47.4		Peak Found	High	High	High	High	High	High	High	High	High	High	7.23e-06	3.938e-09	4.21	49.46	Used	Used	K.KIWCFGPETTGPNMVVDMCK.G	[633-652]
	FALSE	High	[K].KQETVEDVPCGNTVALVGLDQYITK.[N]	1xCarbamidomethyl [C10]	5.58345e-07	5.33751e-05	1	2	50	731362937	731362937 [439-463]		1	2777.4	49.8	176.7	15.6	167.9	189.1	89.6	82.1	84.9	94.7	49.6		High	High	High	High	High	High	High	High	High	High	High	7.23e-06	7.331e-08	4.39	50.64	Used	Used	K.KQETVEDVPCGNTVALVGLDQYITK.N	[439-463]
	FALSE	High	[K].LGIQMK.[T]		0.0882498	0.00441887	1	2	1	731362937	731362937 [301-306]		0	689.401						270.3	258.8	25.3	237.2	208.5		Not Found	Not Found	Not Found	Not Found	Not Found	Peak Found	High	Peak Found	Peak Found	Peak Found	High	0.000639	0.009494	1.95	11.52	Used	Used	K.LGIQMK.T	[301-306]
	FALSE	High	[K].LGIQMKTEEKDLMGK.[A]		5.33503e-06	5.33751e-05	1	1	15	731362937	731362937 [301-315]		2	1720.9	467.1	92.7	16.2	166.2	153.3	4.3	1.5	30.8	41	27		High	High	Peak Found	High	High	Peak Found	Peak Found	High	High	Peak Found	High	7.23e-06	6.642e-07	4.37	20.42	Used	Used	K.LGIQMKTEEKDLMGK.A	[301-315]
	FALSE	High	[K].ILAEEYGWDKDLAK.[K]		7.55274e-07	5.33751e-05	1	2	97	731362937	731362937 [619-632]		1	1650.84	50.9	102.4	69.5	181.3	181.8	82.3	105.6	81.4	86	58.7		High	High	High	High	High	High	High	High	High	High	High	7.23e-06	9.839e-08	3.76	31.16	Used	Used	K.ILAEEYGWDKDLAK.K	[619-632]
	FALSE	High	[K].ILAEEYGWDKDLAKK.[I]		1.85551e-07	5.33751e-05	1	2	39	731362937	731362937 [619-633]		2	1778.93	15	84.1	25	191.9	339.5	110.5	75.7	49.9	54.7	53.7		High	High	High	High	High	High	High	High	High	High	High	7.23e-06	2.508e-08	3.27	23.47	Used	Used	K.ILAEEYGWDKDLAKK.I	[619-633]
	FALSE	High	[R].LLEPVYLVEIQAPENALGGIYSVLNQK.[R]		1.06872e-08	5.33751e-05	1	2	69	731362937	731362937 [725-751]		0	2970.62	114	143.7	241.9	43.7	120.5	53	85	57.7	94.5	46.1		High	High	High	High	High	High	High	High	High	High	High	7.23e-06	1.553e-09	3.83	100.05	Used	Used	R.LLEPVYLVEIQAPENALGGIYSVLNQK.R	[725-751]
	FALSE	High	[R].LLEPVYLVEIQAPENALGGIYSVLNQKR.[G]		1.50974e-09	5.33751e-05	1	2	51	731362937	731362937 [725-752]		1	3126.72	306.1	159.4	134.2	60	95	34.3	47.8	53.7	67.9	41.5		High	High	High	High	High	High	High	High	High	High	High	7.23e-06	2.303e-10	4.51	96.39	Used	Used	R.LLEPVYLVEIQAPENALGGIYSVLNQKR.G	[725-752]
	FALSE	High	[R].IMGPNYVPGEK.[K]		6.59416e-05	5.33751e-05	1	2	12	731362937	731362937 [411-421]		0	1204.6	57	42.9	2.5	28.5	81.9	144.1	204.6	121.4	198.4	118.8		Peak Found	High	Peak Found	Peak Found	High	High	High	High	High	High	High	7.23e-06	7.777e-06	2.44	13.11	Used	Used	R.IMGPNYVPGEK.K	[411-421]
	FALSE	High	[R].IMGPNYVPGEKK.[D]		6.8866e-05	5.33751e-05	1	2	15	731362937	731362937 [411-422]		1	1332.7	15.4	40.1	225.9	67.2	132	75.8	102.5	99	129.3	112.9		Peak Found	High	High	High	Peak Found	Peak Found	High	High	High	Peak Found	High	7.23e-06	8.127e-06	3.54	11.19	Used	Used	R.IMGPNYVPGEKK.D	[411-422]
	FALSE	High	[R].IMGPNYVPGEKKDLYVK.[N]		2.10889e-06	5.33751e-05	1	2	41	731362937	731362937 [411-427]		2	1951.04	144.7	66.1	125	168.6	194	39.8	78.3	65.5	70.6	47.5		High	High	High	High	High	High	High	High	High	High	High	7.23e-06	2.678e-07	3.54	10.64	Used	Used	R.IMGPNYVPGEKKDLYVK.N	[411-427]
	FALSE	High	[R].IRPVLTVNK.[M]		0.00468007	0.000431659	1	2	24	731362937	731362937 [151-159]		0	1039.66	14.1	60.5	134.6	99.8	18.5	146.2	151.8	100.1	144.2	130.2		Peak Found	High	High	High	Peak Found	High	High	High	High	High	High	5.722e-05	0.000472	2.45	9.79	Used	Used	R.IRPVLTVNK.M	[151-159]
	FALSE	High	[R].IRPVLTVNKMDR.[C]		5.82609e-06	5.33751e-05	1	2	60	731362937	731362937 [151-162]		1	1441.83	68.8	76	112.3	189.8	215.5	59.5	62.1	35.6	83.6	96.8		High	High	High	High	High	High	High	High	High	High	High	7.23e-06	7.227e-07	4.84	8.95	Used	Used	R.IRPVLTVNKMDR.C	[151-162]
	FALSE	High	[R].ITDGALVVVDCIEGVCVQTETVLR.[Q]	2xCarbamidomethyl [C11; C16]	1.73313e-08	5.33751e-05	1	2	14	731362937	731362937 [121-144]		0	2646.35	52.4	366.4	159.3	53.4	1.9	46.2	60.4	138.7	94.1	27.3		Peak Found	High	High	High	Peak Found	High	High	High	Peak Found	High	High	7.23e-06	2.491e-09	3.95	86.5	Used	Used	R.ITDGALVVVDCIEGVCVQTETVLR.Q	[121-144]
	FALSE	High	[K].IWCFGPETTGPNMVVDMCK.[G]	2xCarbamidomethyl [C3; C18]	1.41434e-06	5.33751e-05	1	2	46	731362937	731362937 [634-652]		0	2241.98	1.6	229.8	22.2	146.1	93.8	63.6	93.4	166.1	123.9	59.7		Peak Found	High	High	High	High	High	High	High	High	High	High	7.23e-06	1.819e-07	1.59	62.34	Used	Used	K.IWCFGPETTGPNMVVDMCK.G	[634-652]
	FALSE	High	[K].IWCFGPETTGPNMVVDMCK.[G]	2xCarbamidomethyl [C3; C18]; 1xOxidation [M13]	0.000560871	0.000126394	1	2	2	731362937	731362937 [634-652]		0	2257.97			454.7		361	184.2						Not Found	Not Found	Peak Found	Not Found	High	High	Not Found	Not Found	Not Found	Not Found	High	1.859e-05	6.115e-05	1.49	51.98	Used	Used	K.IWCFGPETTGPNMVVDMCK.G	[634-652]
	FALSE	High	[R].LWGENFFDPATK.[K]		5.2858e-06	5.33751e-05	1	2	61	731362937	731362937 [244-255]		0	1424.68	61.1	113.2	65.5	56.9	96.7	141.2	141.8	105.8	90.3	127.4		High	High	High	High	High	High	High	High	High	High	High	7.23e-06	6.559e-07	2.91	57.96	Used	Used	R.LWGENFFDPATK.K	[244-255]
	FALSE	High	[R].LWGENFFDPATKK.[W]		1.65636e-06	5.33751e-05	1	2	155	731362937	731362937 [244-256]		1	1552.78	61	101	51.8	105.1	121.2	226.5	91.3	58	79.7	104.4		High	High	High	High	High	High	High	High	High	High	High	7.23e-06	2.119e-07	3.22	43.05	Used	Used	R.LWGENFFDPATKK.W	[244-256]
	FALSE	High	[R].LWGENFFDPATKKWTTK.[N]		1.00115e-05	5.33751e-05	1	2	19	731362937	731362937 [244-260]		2	2069.05	380.1	89	39	53.9	87.5	47.6	65.6	55.9	93.3	88		High	High	High	High	High	Peak Found	High	High	High	High	High	7.23e-06	1.225e-06	3.39	46.75	Used	Used	R.LWGENFFDPATKKWTTK.N	[244-260]
	FALSE	High	[R].LYMEARPMEEGLAEAIDEGR.[I]		9.84379e-10	5.33751e-05	1	2	131	731362937	731362937 [587-606]		0	2280.06	85.1	122.2	82.6	138.5	159.2	109.4	71.9	56.3	87.8	86.9		High	High	High	High	High	High	High	High	High	High	High	7.23e-06	1.519e-10	5.56	50.26	Used	Used	R.LYMEARPMEEGLAEAIDEGR.I	[587-606]
	FALSE	High	[R].LYMEARPMEEGLAEAIDEGR.[I]	1xOxidation [M]	5.47194e-09	5.33751e-05	1	2	48	731362937	731362937 [587-606]		0	2296.06	3.1	37.5	12.3	94.4	387.3	108.4	88.8	73.4	38.2	156.7		Peak Found	Peak Found	High	High	High	High	High	High	High	High	High	7.23e-06	8.089e-10	5.05	102.79	Used	Used	R.LYMEARPMEEGLAEAIDEGR.I	[587-606]
	FALSE	High	[R].LYMEARPMEEGLAEAIDEGR.[I]	2xOxidation [M3; M8]	5.46011e-06	5.33751e-05	1	2	7	731362937	731362937 [587-606]		0	2312.05	38.1				224.6	49.1			194.6	493.6		High	Not Found	Not Found	Not Found	High	High	Not Found	Not Found	Peak Found	High	High	7.23e-06	6.768e-07	1.7	50.72	Used	Used	R.LYMEARPMEEGLAEAIDEGR.I	[587-606]
	FALSE	High	[R].LYMEARPMEEGLAEAIDEGRIGPR.[D]		5.96841e-08	5.33751e-05	1	2	30	731362937	731362937 [587-610]		1	2703.32	241	137.4	19.3	217.9	74.9	20	109.6	49.5	86.6	43.8		High	High	High	High	High	High	High	High	High	High	High	7.23e-06	8.315e-09	3.77	52	Used	Used	R.LYMEARPMEEGLAEAIDEGRIGPR.D	[587-610]
	FALSE	High	[R].LYMEARPMEEGLAEAIDEGRIGPR.[D]	1xOxidation [M3]	0.000517549	0.000126394	1	2	1	731362937	731362937 [587-610]		1	2719.32					1000							Not Found	Not Found	Not Found	Not Found	High	Not Found	Not Found	Not Found	Not Found	Not Found	High	1.859e-05	5.656e-05	1.89	52.71	Used	Used	R.LYMEARPMEEGLAEAIDEGRIGPR.D	[587-610]
	FALSE	High	[R].LYMEARPMEEGLAEAIDEGRIGPRDDPK.[N]		0.0402333	0.00228592	1	2	1	731362937	731362937 [587-614]		2	3158.52	492.1					136.4			348.9	22.6		High	Not Found	Not Found	Not Found	Not Found	Peak Found	Not Found	Not Found	Peak Found	Peak Found	High	0.0003434	0.004121	2.59	103.65	Used	Used	R.LYMEARPMEEGLAEAIDEGRIGPRDDPK.N	[587-614]
	FALSE	High	[K].MDRCFLELQVDGEEAYTTFQK.[V]	1xCarbamidomethyl [C4]	0.000105943	5.33751e-05	1	2	4	731362937	731362937 [160-180]		1	2580.17		280.8		174.5	73.2	230.7			240.7			Not Found	High	Not Found	High	Peak Found	High	Not Found	Not Found	Peak Found	Not Found	High	7.23e-06	1.245e-05	4.05	59.44	Used	Used	K.MDRCFLELQVDGEEAYTTFQK.V	[160-180]
	FALSE	High	[R].MTDTRADEAERGITIK.[S]		2.5159e-06	5.33751e-05	1	2	27	731362937	731362937 [56-71]		2	1806.9	158.2	152.1	46.8	185.1	153.6	13.7	45.9	84.4	82.4	77.7		High	High	High	High	Peak Found	Peak Found	High	High	High	High	High	7.23e-06	3.18e-07	4.46	9.91	Used	Used	R.MTDTRADEAERGITIK.S	[56-71]
	FALSE	High	[-].MVKFTADELR.[A]	1xMet-loss [N-Term]	0.000136202	9.51359e-05	1	2	93	731362937	731362937 [1-10]	731362937 1xMet-loss [N-Term]	1	1078.59	91.4	121.2	154.2	101.8	98.7	70.8	95.6	65.8	76.2	124.3		High	High	High	High	High	High	High	High	High	High	High	1.364e-05	1.593e-05	1.93	11.75	Used	Used	-.MVKFTADELR.A	[1-10]
	FALSE	High	[-].MVKFTADELRAIMDCK.[H]	1xCarbamidomethyl [C15]; 1xMet-loss [N-Term]	0.0371947	0.00213503	1	2	2	731362937	731362937 [1-16]	731362937 1xMet-loss [N-Term]	2	1796.9			327.5		648.3					24.2		Not Found	Not Found	Peak Found	Not Found	High	Not Found	Not Found	Not Found	Not Found	Peak Found	High	0.0003154	0.003813	1.37	30.09	Used	Used	-.MVKFTADELRAIMDCK.H	[1-16]
	FALSE	High	[K].NATLTNEKESDAHPIR.[A]		5.29675e-09	5.33751e-05	1	2	97	731362937	731362937 [464-479]		1	1795.89	128.9	46.1	116.4	69.4	90.5	117.2	141.6	101.4	145.7	42.7		High	High	High	High	High	High	High	High	High	High	High	7.23e-06	7.851e-10	5.42	8.7	Used	Used	K.NATLTNEKESDAHPIR.A	[464-479]
	FALSE	High	[K].NATLTNEKESDAHPIRAMK.[F]		1.12836e-07	5.33751e-05	1	2	10	731362937	731362937 [464-482]		2	2126.07	89.4	5.8	262.5	166.4	326.8	8.4	11.6	25.5	6.5	96.9		High	Peak Found	Peak Found	High	Peak Found	Peak Found	Peak Found	High	Peak Found	Peak Found	High	7.23e-06	1.545e-08	4.17	9.16	Used	Used	K.NATLTNEKESDAHPIRAMK.F	[464-482]
	FALSE	High	[R].NCDPEGPLMLYVSK.[M]	1xCarbamidomethyl [C2]	4.77327e-06	5.33751e-05	1	2	78	731362937	731362937 [369-382]		0	1622.76	22.7	172.8	113	78.8	154.5	86.6	71	99.6	109.7	91.2		High	High	High	High	High	High	High	High	High	High	High	7.23e-06	5.95e-07	3.48	44.64	Used	Used	R.NCDPEGPLMLYVSK.M	[369-382]
	FALSE	High	[R].NCDPEGPLMLYVSK.[M]	1xCarbamidomethyl [C2]; 1xOxidation [M9]	4.86823e-05	5.33751e-05	1	2	8	731362937	731362937 [369-382]		0	1638.75					15.3	79.9	34.7	16.5		853.6		Not Found	High	Not Found	Not Found	Peak Found	High	Peak Found	Peak Found	Not Found	High	High	7.23e-06	5.762e-06	1.88	28.13	Used	Used	R.NCDPEGPLMLYVSK.M	[369-382]
	FALSE	High	[R].NMSVIAHVDHGK.[S]		1.63343e-06	5.33751e-05	1	2	62	731362937	731362937 [21-32]		0	1307.65	141.8	85.3	95.2	102	57.4	101.4	109.3	144.7	131	31.9		High	High	High	High	High	High	High	High	High	High	High	7.23e-06	2.091e-07	3.37	9.07	Used	Used	R.NMSVIAHVDHGK.S	[21-32]
	FALSE	High	[R].NMSVIAHVDHGK.[S]	1xOxidation [M2]	3.2215e-05	5.33751e-05	1	2	4	731362937	731362937 [21-32]		0	1323.65							1000					Not Found	Not Found	Not Found	Not Found	Not Found	High	High	Not Found	Not Found	Not Found	High	7.23e-06	3.839e-06	2.87	86.3	Used	Used	R.NMSVIAHVDHGK.S	[21-32]
	FALSE	High	[R].NMSVIAHVDHGKSTLTDSLVAAAGIIAQEVAGDVR.[M]		7.41325e-10	5.33751e-05	1	2	66	731362937	731362937 [21-55]		1	3545.84	295	63.1	121	92.4	173.6	45	74.7	15.4	84.8	35		High	High	High	High	High	High	High	High	High	High	High	7.23e-06	1.155e-10	6.25	108.33	Used	Used	R.NMSVIAHVDHGKSTLTDSLVAAAGIIAQEVAGDVR.M	[21-55]
	FALSE	High	[K].QETVEDVPCGNTVALVGLDQYITK.[N]	1xCarbamidomethyl [C9]	0.000123149	9.51359e-05	1	2	2	731362937	731362937 [440-463]		0	2649.31		387.1			10.9	53	82.8	47.1	138.8	280.2		Not Found	High	Not Found	Not Found	Peak Found	Peak Found	Peak Found	Peak Found	Peak Found	High	High	1.364e-05	1.447e-05	3.15	61.18	Used	Used	K.QETVEDVPCGNTVALVGLDQYITK.N	[440-463]
	FALSE	High	[K].QIIATCMNDQKDKLWPMLTK.[L]	1xCarbamidomethyl [C6]	0.000163243	9.51359e-05	1	1	13	731362937	731362937 [281-300]		2	2434.23	15.3	97.7	61.2	85.8	144.3	221.6	203.4	22.4	141.6	6.7		Peak Found	Peak Found	High	High	High	High	High	Peak Found	High	Peak Found	High	1.696e-05	1.9e-05	4.16	105.48	Used	Used	K.QIIATCMNDQKDKLWPMLTK.L	[281-300]
	FALSE	High	[K].RGFVQFCYEPIK.[Q]	1xCarbamidomethyl [C7]	0.00113293	0.000154279	1	2	9	731362937	731362937 [269-280]		1	1543.77		6.1	18.7	47.1	34.3	181.9	70.5	330	264.8	46.6		Not Found	Peak Found	Peak Found	High	Peak Found	High	Peak Found	High	High	Peak Found	High	2.424e-05	0.0001188	3.04	27.79	Used	Used	K.RGFVQFCYEPIK.Q	[269-280]
	FALSE	High	[K].RGHVFEEMQRPGTPLYNIK.[A]		1.68294e-07	5.33751e-05	1	2	78	731362937	731362937 [752-770]		1	2272.17	146.6	115.6	110.4	99.6	37.7	155	80.8	60.4	65.6	128.3		High	High	High	High	High	High	High	High	High	High	High	7.23e-06	2.276e-08	5.4	23.22	Used	Used	K.RGHVFEEMQRPGTPLYNIK.A	[752-770]
	FALSE	High	[K].RGHVFEEMQRPGTPLYNIK.[A]	1xOxidation [M8]	6.75697e-06	5.33751e-05	1	2	7	731362937	731362937 [752-770]		1	2288.16	2.9			5.9	13.8	44	73.6	26.1	109.7	724		Peak Found	Not Found	Not Found	Peak Found	Peak Found	Peak Found	High	Peak Found	High	High	High	7.23e-06	8.342e-07	5.37	20.28	Used	Used	K.RGHVFEEMQRPGTPLYNIK.A	[752-770]
	FALSE	High	[R].RVFYASQLTAKPR.[L]		5.19149e-08	5.33751e-05	1	2	260	731362937	731362937 [712-724]		1	1536.86	108.8	58.7	36.1	161.9	156	67.3	92	90.5	118.4	110.1		High	High	High	High	High	High	High	High	High	High	High	7.23e-06	7.258e-09	5.2	10.93	Used	Used	R.RVFYASQLTAKPR.L	[712-724]
	FALSE	High	[R].RVFYASQLTAKPR.[L]	1xGG [K11]	0.0112464	0.000853352	1	2	2	731362937	731362937 [712-724]		1	1650.91	22.6	111.8	448.1			53.9	144.1	160.1	59.3			Peak Found	High	High	Not Found	Not Found	Peak Found	Peak Found	Peak Found	Peak Found	Not Found	High	0.0001191	0.001152	3.11	10.83	Used	Used	R.RVFYASQLTAKPR.L	[712-724]
	FALSE	High	[K].RVMQTWLPASSALLEMMIHHLPSPATAQR.[Y]		5.42927e-10	5.33751e-05	1	2	40	731362937	731362937 [320-348]		1	3272.69	145.2	73.7	92.9	146	8.7	74.7	97.8	143.7	130.1	87.1		High	High	High	High	Peak Found	High	High	High	High	High	High	7.23e-06	8.52e-11	4.69	108.2	Used	Used	K.RVMQTWLPASSALLEMMIHHLPSPATAQR.Y	[320-348]
	FALSE	High	[K].RVMQTWLPASSALLEMMIHHLPSPATAQR.[Y]	1xOxidation [M]	0.00283858	0.000222105	1	2	2	731362937	731362937 [320-348]		1	3288.68										1000		Not Found	Not Found	Not Found	Not Found	Not Found	Not Found	Not Found	Not Found	Not Found	High	High	3.769e-05	0.0002862	2.45	72.25	Used	Used	K.RVMQTWLPASSALLEMMIHHLPSPATAQR.Y	[320-348]
	FALSE	High	[K].RVMQTWLPASSALLEMMIHHLPSPATAQR.[Y]	1xGG [T5]	0.0115326	0.000882483	1	2	1	731362937	731362937 [320-348]		1	3386.73											No Quan Values	Not Found	Not Found	High	Not Found	Not Found	Not Found	Not Found	Not Found	Not Found	Not Found	High	0.0001222	0.001183	3.71		Not Used	Not Used	K.RVMQTWLPASSALLEMMIHHLPSPATAQR.Y	[320-348]
	FALSE	High	[K].SDPMVVCSIEESGEHIIAGAGELHLEICLKDLQDDFMGGAEIIK.[S]	2xCarbamidomethyl [C7; C28]	2.07123e-05	5.33751e-05	1	2	2	731362937	731362937 [514-557]		1	4826.3	26.2	98.4	363.7	84.5			427.2					Peak Found	Peak Found	High	Peak Found	Not Found	Not Found	Peak Found	Not Found	Not Found	Not Found	High	7.23e-06	2.493e-06	3.61	108.05	Used	Used	K.SDPMVVCSIEESGEHIIAGAGELHLEICLKDLQDDFMGGAEIIK.S	[514-557]
	FALSE	High	[K].SDPVVSFR.[E]		0.00243011	0.000222105	1	2	29	731362937	731362937 [558-565]		0	906.468	43	34.5	92.6	48.1	81.7	171.1	168.8	83.1	121.1	155.9		Peak Found	High	High	High	Peak Found	High	High	High	High	High	High	3.769e-05	0.0002476	1.76	13.51	Used	Used	K.SDPVVSFR.E	[558-565]
	FALSE	High	[K].SDPVVSFRETVLDR.[S]		0.000322305	0.000126394	1	2	16	731362937	731362937 [558-571]		1	1619.84	273.8	181.5	20.6	92.8	79.9	35	82.1	72.7	101	60.8		High	High	High	High	High	Peak Found	High	High	High	Peak Found	High	1.859e-05	3.613e-05	2.01	35.63	Used	Used	K.SDPVVSFRETVLDR.S	[558-571]
	FALSE	High	[R].SKILAEEYGWDKDLAK.[K]		7.19875e-09	5.33751e-05	1	2	93	731362937	731362937 [617-632]		2	1865.96	32.8	109.3	29.7	121.9	256.8	119	107.9	73.5	78.9	70.3		High	High	High	High	High	High	High	High	High	High	High	7.23e-06	1.056e-09	5.43	25.39	Used	Used	R.SKILAEEYGWDKDLAK.K	[617-632]
	FALSE	High	[R].SKILAEEYGWDKDLAK.[K]	1xGG [K/S]	7.34419e-06	5.33751e-05	1	2	5	731362937	731362937 [617-632]		2	1980.01		130.8	188.9	42.8	26.7	162.2	202.1	116.1	94.4	35.9		Not Found	High	High	Peak Found	Peak Found	Peak Found	Peak Found	Peak Found	High	Peak Found	High	7.23e-06	9.06e-07	3.32	17.95	Used	Used	R.SKILAEEYGWDKDLAK.K	[617-632]
	FALSE	High	[K].STGISLYYQMTDEALQSYK.[G]		1.11593e-06	5.33751e-05	1	2	7	731362937	731362937 [72-90]		0	2198.03		76.6	2.1	131.5	10.1	59.8	39.4	432.8	128.8	118.9		Not Found	Peak Found	Peak Found	High	Peak Found	High	Peak Found	High	High	Peak Found	High	7.23e-06	1.444e-07	3.58	68.64	Used	Used	K.STGISLYYQMTDEALQSYK.G	[72-90]
	FALSE	High	[K].STGISLYYQMTDEALQSYKGER.[K]		2.74133e-10	5.33751e-05	1	2	103	731362937	731362937 [72-93]		1	2540.2	80.6	86.7	83.9	139.6	144	78.1	82.1	151.4	81.3	72.2		High	High	High	High	High	High	High	High	High	High	High	7.23e-06	4.367e-11	5.78	60.25	Used	Used	K.STGISLYYQMTDEALQSYKGER.K	[72-93]
	FALSE	High	[K].STGISLYYQMTDEALQSYKGER.[K]	1xOxidation [M10]	7.86351e-09	5.33751e-05	1	2	16	731362937	731362937 [72-93]		1	2556.19	16.6	33.2	14.5	145.9	298	89.6	10	129.1	56.6	206.6		Peak Found	High	High	High	High	Peak Found	Peak Found	High	High	High	High	7.23e-06	1.15e-09	5.05	42.8	Used	Used	K.STGISLYYQMTDEALQSYKGER.K	[72-93]
	FALSE	High	[K].STGISLYYQMTDEALQSYKGERK.[G]		0.000481038	0.000126394	1	2	4	731362937	731362937 [72-94]		2	2668.29		44.1	66.1	327.3	243.8		82.4	116.1	88.2	31.9		Not Found	Peak Found	Peak Found	High	High	Not Found	Peak Found	High	High	Peak Found	High	1.859e-05	5.29e-05	2.61	48.33	Used	Used	K.STGISLYYQMTDEALQSYKGERK.G	[72-94]
	FALSE	High	[K].STLTDSLVAAAGIIAQEVAGDVR.[M]		4.8859e-11	5.33751e-05	1	2	132	731362937	731362937 [33-55]		0	2257.2	121.7	22.3	21	46.3	188	67.1	143.3	202.2	65.6	122.5		High	High	High	High	High	High	High	High	High	High	High	7.23e-06	8.123e-12	6.04	108.55	Used	Used	K.STLTDSLVAAAGIIAQEVAGDVR.M	[33-55]
	FALSE	High	[R].TVIWMGK.[K]		0.00374179	0.000400026	1	2	89	731362937	731362937 [432-438]		0	834.454	57.9	87.8	163.4	72.4	84.5	82.2	132.4	95.2	110.8	113.5		High	High	High	High	High	High	High	High	High	High	High	5.451e-05	0.0003772	1.08	18.25	Used	Used	R.TVIWMGK.K	[432-438]
	FALSE	High	[R].TVIWMGK.[K]	1xOxidation [M5]	0.0183945	0.001191	1	2	8	731362937	731362937 [432-438]		0	850.449	30	37.6	185.5	25.8	70.3	139.1	119.7	50.4	104.7	237		Peak Found	High	High	Peak Found	Peak Found	High	High	Peak Found	High	High	High	0.0001805	0.001893	1.04	13.34	Used	Used	R.TVIWMGK.K	[432-438]
	FALSE	High	[R].TVIWMGKK.[Q]		0.0120266	0.000882483	1	2	6	731362937	731362937 [432-439]		1	962.549	176.6	53.5	118.2	24.6	12.9	65.2	192.6	84.3	140.9	131.3		High	High	Peak Found	Peak Found	Peak Found	Peak Found	Peak Found	High	Peak Found	Peak Found	High	0.000128	0.001232	1.55	10.97	Used	Used	R.TVIWMGKK.Q	[432-439]
	FALSE	High	[R].TVIWMGKKQETVEDVPCGNTVALVGLDQYITK.[N]	1xCarbamidomethyl [C17]	4.70733e-06	5.33751e-05	1	2	4	731362937	731362937 [432-463]		2	3592.84	19.2	18.4		496.8			4	386.6		75		Peak Found	Peak Found	Not Found	High	Not Found	Not Found	Peak Found	High	Not Found	Peak Found	High	7.23e-06	5.859e-07	3.57	50.21	Used	Used	R.TVIWMGKKQETVEDVPCGNTVALVGLDQYITK.N	[432-463]
	FALSE	High	[R].VENLYEGPMDDVYATAIR.[N]		9.55467e-05	5.33751e-05	1	2	4	731362937	731362937 [351-368]		0	2055.97	178.8	224.8		58.3	121.4	56		250.7		110		Peak Found	High	Not Found	Peak Found	Peak Found	High	Not Found	High	Not Found	High	High	7.23e-06	1.126e-05	2.47	53.82	Used	Used	R.VENLYEGPMDDVYATAIR.N	[351-368]
	FALSE	High	[R].VFYASQLTAKPR.[L]		3.66427e-06	5.33751e-05	1	2	95	731362937	731362937 [713-724]		0	1380.76	223.9	118.5	109.8	55.4	101.7	44.3	80	100	72.4	93.9		High	High	High	High	High	High	High	High	High	High	High	7.23e-06	4.6e-07	2.79	10.2	Used	Used	R.VFYASQLTAKPR.L	[713-724]
	FALSE	High	[K].VIENANVIMATYEDPLLGDVQVYPEK.[G]		8.28308e-06	5.33751e-05	1	2	16	731362937	731362937 [181-206]		0	2920.46	5	121.6	51.5	75.6	44.3	72.2	88.1	297.2	124.7	119.8		Peak Found	Peak Found	High	High	Peak Found	High	High	High	High	High	High	7.23e-06	1.018e-06	3.33	74.71	Used	Used	K.VIENANVIMATYEDPLLGDVQVYPEK.G	[181-206]
	FALSE	High	[R].VMQTWLPASSALLEMMIHHLPSPATAQR.[Y]		1.84652e-10	5.33751e-05	1	2	250	731362937	731362937 [321-348]		0	3116.58	88.5	88.9	133.4	87.8	82	51.5	119.7	104.8	183.8	59.6		High	High	High	High	High	High	High	High	High	High	High	7.23e-06	2.977e-11	6.75	103.4	Used	Used	R.VMQTWLPASSALLEMMIHHLPSPATAQR.Y	[321-348]
	FALSE	High	[R].VMQTWLPASSALLEMMIHHLPSPATAQR.[Y]	1xOxidation [M]	4.4871e-10	5.33751e-05	1	2	59	731362937	731362937 [321-348]		0	3132.58	41.7	89.1	154.5	51.3	76.7	69.8	118.9	62.3	68.3	267.4		Peak Found	High	Peak Found	High	High	High	Peak Found	High	High	High	High	7.23e-06	7.059e-11	6.1	107.14	Used	Used	R.VMQTWLPASSALLEMMIHHLPSPATAQR.Y	[321-348]
	FALSE	High	[R].VMQTWLPASSALLEMMIHHLPSPATAQR.[Y]	2xOxidation [M15; M]	1.45032e-07	5.33751e-05	1	2	12	731362937	731362937 [321-348]		0	3148.57	28.1	24.6		42.7	173.6	149.2	45.4	16	29.1	491.2		Peak Found	Peak Found	Not Found	High	High	High	Peak Found	Peak Found	Peak Found	High	High	7.23e-06	1.969e-08	5.63	53.84	Used	Used	R.VMQTWLPASSALLEMMIHHLPSPATAQR.Y	[321-348]
	FALSE	High	[R].VMQTWLPASSALLEMMIHHLPSPATAQR.[Y]	3xOxidation [M2; M15; M16]	0.00442454	0.000431659	1	2	2	731362937	731362937 [321-348]		0	3164.57	61.3	93.4		94.3	336.6			21.5	132.1	260.8		Peak Found	Peak Found	Not Found	Peak Found	High	Not Found	Not Found	Peak Found	Peak Found	High	High	5.722e-05	0.0004458	1.58	90.94	Used	Used	R.VMQTWLPASSALLEMMIHHLPSPATAQR.Y	[321-348]
	FALSE	High	[R].VMQTWLPASSALLEMMIHHLPSPATAQR.[Y]	1xPhospho [S/T]	0.00405203	0.000400026	1	2	3	731362937	731362937 [321-348]	731362937 1xPhospho [S/T]	0	3196.55				43						957		Not Found	Not Found	Not Found	Peak Found	Not Found	Not Found	Not Found	Not Found	Not Found	High	High	5.451e-05	0.0004061	0.74	83.26	Used	Used	R.VMQTWLPASSALLEMMIHHLPSPATAQR.Y	[321-348]
	FALSE	High	[R].YRVENLYEGPMDDVYATAIR.[N]		1.41461e-09	5.33751e-05	1	2	166	731362937	731362937 [349-368]		1	2375.13	138.6	149.1	87.7	110.8	89.5	93.7	89.3	89.5	88.1	63.7		High	High	High	High	High	High	High	High	High	High	High	7.23e-06	2.168e-10	4.13	51.31	Used	Used	R.YRVENLYEGPMDDVYATAIR.N	[349-368]
	FALSE	High	[R].YRVENLYEGPMDDVYATAIR.[N]	1xOxidation [M11]	1.78051e-05	5.33751e-05	1	2	30	731362937	731362937 [349-368]		1	2391.13	14.6	30.5	42.3	144.5	322.6	45.3	23.1	30.1	26.2	320.9		High	High	High	High	High	High	High	High	High	High	High	7.23e-06	2.156e-06	2.91	37.16	Used	Used	R.YRVENLYEGPMDDVYATAIR.N	[349-368]
	FALSE	High	[R].YRVENLYEGPMDDVYATAIRNCDPEGPLMLYVSK.[M]	1xCarbamidomethyl [C22]	3.755e-09	5.33751e-05	1	2	8	731362937	731362937 [349-382]		2	3978.87	96.7	214.2		356.7	65.7		63.4	52.4	123	28		High	High	Not Found	High	High	Not Found	High	Peak Found	Peak Found	High	High	7.23e-06	5.607e-10	7.18	73.97	Used	Used	R.YRVENLYEGPMDDVYATAIRNCDPEGPLMLYVSK.M	[349-382]
FALSE		High	Master Protein	-6347917631231133902	683	1108923008	PREDICTED: 5-methyltetrahydropteroyltriglutamate--homocysteine methyltransferase [Beta vulgaris subsp. vulgaris]	MASGSSSSEMASHIVGYPRMGPKRELKFALESFWDGKSSADDLKKVSADLRSSIWKQMSDAGIKYIPSNTFAYYDQVLDTTAMLGAVPPRYGWTGGEIEFDVYFSMARGNATVPAMEMTKWFDTNYHYIVPELGPDVKFSYASHKAVNEYKEAKALGVDTVPVLVGPVSYLLLSKPAKGVEKSFNLLSLLPKILAIYKEVVTELKAAGASCIQFDEPLLVMDLDSHKLQAFTDAYAELESTLSGLNVIVETYFADVTPEAYKTLISLKGVTGFGFDLIRGTQSLELIKGGFPSDKYLFAGVVDGRNIWANDLAASLALLQSLQGLVGKDKLVVSTSCSLLHTAVDLVNETKLDDEIKSWLAFAAQKVVEVNALAKALSGQKDEAFFSANAAAQASRKSS…	>gi|1108923008|ref|XP_010677810.2| PREDICTED: 5-methyltetrahydropteroyltriglutamate--homocysteine methyltransferase [Beta vulgaris subsp. vulgaris]	0	1064.86	84	83	4186	70	70	774	85.5	6.47	10520.3	84	4186	83	16	92.9	88.7	111.6	107.1	98.6	121.6	92.7	99.9	95.6	91.2	2.95366e+09	5.7295e+09	4.45701e+09	3.51693e+09	1.24063e+09	6.46686e+09	2.5248e+09	3.83675e+09	4.50097e+09	4.13585e+09	6.00261e+09	5.7295e+09	7.20813e+09	6.9154e+09	6.36476e+09
	Checked	Confidence	Annotated Sequence	Modifications	Qvality PEP	Qvality q-value	# Protein Groups	# Proteins	# PSMs	Master Protein Accessions	Positions in Master Proteins	Modifications in Master Proteins	# Missed Cleavages	Theo. MH+ [Da]	Abundances (Scaled): F1: Control	Abundances (Scaled): F2: Control	Abundances (Scaled): F3: Control	Abundances (Scaled): F4: Control	Abundances (Scaled): F5: Control	Abundances (Scaled): F6: Sample	Abundances (Scaled): F7: Sample	Abundances (Scaled): F8: Sample	Abundances (Scaled): F9: Sample	Abundances (Scaled): F10: Sample	Quan Info	Found in Sample: [S1] F1: Control	Found in Sample: [S2] F2: Control	Found in Sample: [S3] F3: Control	Found in Sample: [S4] F4: Control	Found in Sample: [S5] F5: Control	Found in Sample: [S6] F6: Sample	Found in Sample: [S7] F7: Sample	Found in Sample: [S8] F8: Sample	Found in Sample: [S9] F9: Sample	Found in Sample: [S10] F10: Sample	Confidence (by Search Engine): Sequest HT	Percolator q-Value (by Search Engine): Sequest HT	Percolator PEP (by Search Engine): Sequest HT	XCorr (by Search Engine): Sequest HT	Top Apex RT [min]	Quan Usage	Quan Ratio Usage	Sequence in Protein	Positions in Proteins
	FALSE	High	[K].AAGASCIQFDEPLLVMDLDSHK.[L]	1xCarbamidomethyl [C6]	8.09804e-07	5.33751e-05	1	1	16	1108923008	1108923008 [206-227]		0	2417.15	16.2	78.7	273.7	99.7	48.6	65.1	91.1	86.5	117.4	123.2		Peak Found	High	High	High	High	High	Peak Found	High	High	High	High	7.23e-06	1.056e-07	4.35	103.49	Used	Used	K.AAGASCIQFDEPLLVMDLDSHK.L	[206-227]
	FALSE	High	[K].AAGASCIQFDEPLLVMDLDSHK.[L]	1xCarbamidomethyl [C6]; 1xOxidation [M16]	0.00237461	0.000222105	1	1	1	1108923008	1108923008 [206-227]		0	2433.14					44	399.3	48.1			508.6		Not Found	Not Found	Not Found	Not Found	Peak Found	Peak Found	Peak Found	Not Found	Not Found	High	High	3.769e-05	0.000241	1.58	48.34	Used	Used	K.AAGASCIQFDEPLLVMDLDSHK.L	[206-227]
	FALSE	High	[K].AGINVIQIDEAALR.[E]		3.98344e-06	5.33751e-05	1	1	86	1108923008	1108923008 [606-619]		0	1482.83	74.1	102.3	32.2	77.8	56.6	142.1	74.8	180.7	107.6	151.8		High	High	High	High	High	High	High	High	High	High	High	7.23e-06	4.987e-07	2.48	46.96	Used	Used	K.AGINVIQIDEAALR.E	[606-619]
	FALSE	High	[K].AGINVIQIDEAALREGLPLR.[K]		8.14201e-05	5.33751e-05	1	1	11	1108923008	1108923008 [606-625]		1	2148.21	98.2	120.7	9.6	175.8	29.8	110.3	46.7	164.8	131.9	112.1		High	High	Peak Found	High	Peak Found	Peak Found	Peak Found	High	High	High	High	7.23e-06	9.575e-06	3.5	63.8	Used	Used	K.AGINVIQIDEAALREGLPLR.K	[606-625]
	FALSE	High	[K].AGINVIQIDEAALREGLPLRK.[S]		0.000142935	9.51359e-05	1	1	11	1108923008	1108923008 [606-626]		2	2276.31		188.3	196.9	43	150	111	105.7	45.2	102.4	57.4		Not Found	High	Peak Found	High	High	High	Peak Found	High	High	High	High	1.364e-05	1.675e-05	4.37	107.23	Used	Used	K.AGINVIQIDEAALREGLPLRK.S	[606-626]
	FALSE	High	[K].ALGVDTVPVLVGPVSYLLLSKPAK.[G]		4.1982e-09	5.33751e-05	1	1	114	1108923008	1108923008 [155-178]		0	2436.45	98	138.1	210.8	102.7	40.4	95.9	60.4	78.1	126.3	49.4		High	High	High	High	High	High	High	High	High	High	High	7.23e-06	6.246e-10	5.67	109.43	Used	Used	K.ALGVDTVPVLVGPVSYLLLSKPAK.G	[155-178]
	FALSE	High	[K].ALGVDTVPVLVGPVSYLLLSKPAKGVEK.[S]		5.99622e-08	5.33751e-05	1	1	31	1108923008	1108923008 [155-182]		1	2849.68	255.4	212	147.6	97.5	22.2	79.1	31.9	42.4	93.2	18.7		High	High	High	High	High	High	High	High	High	High	High	7.23e-06	8.344e-09	5.78	109.87	Used	Used	K.ALGVDTVPVLVGPVSYLLLSKPAKGVEK.S	[155-182]
	FALSE	High	[K].AIKEEINKVVK.[L]		1.63926e-05	5.33751e-05	1	1	93	1108923008	1108923008 [475-485]		2	1270.77	119.4	86.2	205.6	119.8	125.5	60.7	56.7	61.7	69.5	94.9		High	High	High	High	High	High	High	High	High	High	High	7.23e-06	1.988e-06	2.06	9.67	Used	Used	K.AIKEEINKVVK.L	[475-485]
	FALSE	High	[K].ALSGQKDEAFFSANAAAQASR.[K]		4.26342e-10	5.33751e-05	1	1	113	1108923008	1108923008 [376-396]		1	2140.04	164.9	95.1	28.3	84.8	198.6	95.1	67	103.1	53.7	109.3		High	High	High	High	High	High	High	High	High	High	High	7.23e-06	6.711e-11	4.34	22.42	Used	Used	K.ALSGQKDEAFFSANAAAQASR.K	[376-396]
	FALSE	High	[K].ALSGQKDEAFFSANAAAQASRK.[S]		1.17803e-11	5.33751e-05	1	1	54	1108923008	1108923008 [376-397]		2	2268.14	322.7	67.8	67.2	89.3	182.6	50.8	49.9	73.3	42.1	54.3		High	High	High	High	High	High	High	High	High	High	High	7.23e-06	2.038e-12	6.52	16.23	Used	Used	K.ALSGQKDEAFFSANAAAQASRK.S	[376-397]
	FALSE	High	[R].ATNVSARLDAQQK.[K]		5.40973e-06	5.33751e-05	1	1	2	1108923008	1108923008 [422-434]		1	1401.74	827.2	23.8				9.1	14.7	51.3		73.9		High	Peak Found	Not Found	Not Found	Not Found	Peak Found	Peak Found	Peak Found	Not Found	Peak Found	High	7.23e-06	6.714e-07	3.05	9.58	Used	Used	R.ATNVSARLDAQQK.K	[422-434]
	FALSE	High	[R].CVKPPIIYGDVSRPNPMTVFWSSAAQSMTSRPMK.[G]	1xCarbamidomethyl [C1]	3.71934e-12	5.33751e-05	1	1	81	1108923008	1108923008 [531-564]		0	3838.89	9.1	113	222.3	74.9	23.8	97.2	94.4	129.7	153.7	81.9		High	High	High	High	High	High	High	High	High	High	High	7.23e-06	6.601e-13	8.53	110.12	Used	Used	R.CVKPPIIYGDVSRPNPMTVFWSSAAQSMTSRPMK.G	[531-564]
	FALSE	High	[R].CVKPPIIYGDVSRPNPMTVFWSSAAQSMTSRPMK.[G]	1xCarbamidomethyl [C1]; 1xOxidation [M33]	0.0001494	9.51359e-05	1	1	1	1108923008	1108923008 [531-564]		0	3854.88				159.9	361					479.1		Not Found	Not Found	Not Found	Peak Found	Peak Found	Not Found	Not Found	Not Found	Not Found	High	High	1.696e-05	1.748e-05	2.57	61.75	Used	Used	R.CVKPPIIYGDVSRPNPMTVFWSSAAQSMTSRPMK.G	[531-564]
	FALSE	High	[R].EGVKYGAGIGPGVYDIHSPR.[I]		1.06872e-08	5.33751e-05	2	2	58	1108923008; 731348458	1108923008 [694-713]; 731348458 [737-756]		1	2072.06	256	135.3	43.3	271.7	148.3	24.4	19.5	33.9	36	31.6	Shared	High	High	High	High	High	High	High	High	High	High	High	7.23e-06	1.555e-09	6.45	10.75	Used	Used	R.EGVKYGAGIGPGVYDIHSPR.I	[694-713]
	FALSE	High	[R].EGVKYGAGIGPGVYDIHSPR.[I]	1xGG [K4]	1.13406e-05	5.33751e-05	2	2	1	1108923008; 731348458	1108923008 [694-713]; 731348458 [737-756]		1	2186.1		124.2			31.2		115.6	36.2	197.8	495.1	Shared	Not Found	High	Not Found	Not Found	Peak Found	Not Found	Peak Found	Peak Found	Peak Found	Peak Found	High	7.23e-06	1.385e-06	3.48	17.67	Used	Used	R.EGVKYGAGIGPGVYDIHSPR.I	[694-713]
	FALSE	High	[R].ELKFALESFWDGK.[SI]		1.09295e-05	5.33751e-05	2	2	14	1108923008; 731348458	1108923008 [25-37]; 731348458 [68-80]		1	1569.79	315.2		59.6	82.2	137.1	169.5	10.9		61	164.6	Shared	High	Not Found	High	High	High	High	Peak Found	Not Found	Peak Found	High	High	7.23e-06	1.333e-06	3.18	61.13	Used	Used	R.ELKFALESFWDGK.S	[25-37]
	FALSE	High	[K].FALESFWDGK.[SI]		5.39028e-05	5.33751e-05	2	2	101	1108923008; 731348458	1108923008 [28-37]; 731348458 [71-80]		0	1199.57	35.4	71.9	73	105.6	86.1	244.6	137	86	86.7	73.8	Shared	High	High	High	High	High	High	High	High	High	High	High	7.23e-06	6.383e-06	2.36	59.33	Used	Used	K.FALESFWDGK.S	[28-37]
	FALSE	High	[K].FALESFWDGKSSADDLK.[K]		9.01159e-07	5.33751e-05	1	1	17	1108923008	1108923008 [28-44]		1	1915.91	125.8	278.1	10.5	68.4	84.6	192.1	90.2	47.3	46.9	56.1		High	High	Peak Found	High	High	High	High	High	High	High	High	7.23e-06	1.172e-07	4.75	52.12	Used	Used	K.FALESFWDGKSSADDLK.K	[28-44]
	FALSE	High	[K].FALESFWDGKSSADDLKK.[V]		3.01357e-08	5.33751e-05	1	1	190	1108923008	1108923008 [28-45]		2	2044	65.4	100	76	106.9	157.8	171.8	79.3	66.3	65.2	111.2		High	High	High	High	High	High	High	High	High	High	High	7.23e-06	4.272e-09	3.29	40.48	Used	Used	K.FALESFWDGKSSADDLKK.V	[28-45]
	FALSE	High	[K].FSYASHK.[A]		0.0197068	0.00124898	1	1	9	1108923008	1108923008 [139-145]		0	839.405	9.2	154.7	5.9	17.2	7.2	331.5	236	31.5	206.9			Peak Found	High	Peak Found	Peak Found	Peak Found	High	High	Peak Found	High	Not Found	High	0.0001913	0.00204	1.74	64.14	Used	Used	K.FSYASHK.A	[139-145]
	FALSE	High	[K].FSYASHKAVNEYKEAK.[A]		1.70845e-05	5.33751e-05	1	1	4	1108923008	1108923008 [139-154]		2	1871.93	141.9	20.4	168.1	423.7		44.1		38.1		163.8		High	Peak Found	Peak Found	High	Not Found	Peak Found	Not Found	Peak Found	Not Found	Peak Found	High	7.23e-06	2.065e-06	2.84	10.14	Used	Used	K.FSYASHKAVNEYKEAK.A	[139-154]
	FALSE	High	[K].GGFPSDKYLFAGVVDGR.[N]		5.3632e-08	5.33751e-05	1	1	104	1108923008	1108923008 [289-305]		1	1784.9	52.7	57.4	147.2	71.1	106.5	154.9	99.4	123.3	79.7	107.7		High	High	High	High	High	High	High	High	High	High	High	7.23e-06	7.471e-09	2.83	45.62	Used	Used	K.GGFPSDKYLFAGVVDGR.N	[289-305]
	FALSE	High	[K].GMLTGPVTILNWSFVR.[N]		1.15489e-07	5.33751e-05	2	2	235	1108923008; 731348458	1108923008 [565-580]; 731348458 [608-623]		0	1790.96	37.2	89.8	129.8	138.3	18.7	122.1	92.5	185.1	132.2	54.2	Shared	High	High	High	High	High	High	High	High	High	High	High	7.23e-06	1.577e-08	4.43	110.3	Used	Used	K.GMLTGPVTILNWSFVR.N	[565-580]
	FALSE	High	[K].GMLTGPVTILNWSFVR.[N]	1xOxidation [M2]	3.69754e-08	5.33751e-05	2	2	82	1108923008; 731348458	1108923008 [565-580]; 731348458 [608-623]		0	1806.96	12.9	32.1	97.7	110.5	114.4	129.4	58.3	112.6	79.2	253	Shared	Peak Found	High	High	High	High	High	High	High	High	High	High	7.23e-06	5.201e-09	3.58	77.7	Used	Used	K.GMLTGPVTILNWSFVR.N	[565-580]
	FALSE	High	[K].GMLTGPVTILNWSFVR.[N]	1xPhospho [T4]	0.0395375	0.00222396	2	2	1	1108923008; 731348458	1108923008 [565-580]; 731348458 [608-623]	1108923008 1xPhospho [T568]; 731348458 1xPhospho [T611]	0	1870.93				74				463.7	444.6	17.7	Shared	Not Found	Not Found	Not Found	Peak Found	Not Found	Not Found	Not Found	High	Peak Found	Peak Found	High	0.0003377	0.004074	2.06	89.51	Used	Used	K.GMLTGPVTILNWSFVR.N	[565-580]
	FALSE	High	[K].GMLTGPVTILNWSFVRNDQPR.[HF]		0.000169972	9.51359e-05	2	2	3	1108923008; 731348458	1108923008 [565-585]; 731348458 [608-628]		1	2401.24		350.9		129.9	109.4		116.9	74.2	188.4	30.4	Shared	Not Found	High	Not Found	Peak Found	Peak Found	Not Found	High	Peak Found	High	Peak Found	High	1.696e-05	1.977e-05	2.2	70.25	Used	Used	K.GMLTGPVTILNWSFVRNDQPR.H	[565-585]
	FALSE	High	[R].GNATVPAMEMTK.[W]		2.99623e-05	5.33751e-05	1	1	31	1108923008	1108923008 [109-120]		0	1249.59	70.6	68.5	39	41.6	64.6	119.1	204	84.9	173.3	134.4		High	High	High	High	High	High	High	High	High	High	High	7.23e-06	3.582e-06	3.03	13.49	Used	Used	R.GNATVPAMEMTK.W	[109-120]
	FALSE	High	[R].GNATVPAMEMTK.[W]	1xOxidation [M]	0.000227308	9.51359e-05	1	1	3	1108923008	1108923008 [109-120]		0	1265.59			0.3		6.7	209.5	154.1	16.1	71.3	542		Not Found	Not Found	Peak Found	Not Found	Peak Found	Peak Found	Peak Found	Peak Found	High	High	High	1.696e-05	2.602e-05	2.63	10.17	Used	Used	R.GNATVPAMEMTK.W	[109-120]
	FALSE	High	[R].GNATVPAMEMTKWFDTNYHYIVPELGPDVK.[F]		0.000140655	9.51359e-05	1	1	13	1108923008	1108923008 [109-138]		1	3423.64	114.7	252.1	22.7	161.5	161.5		90.9	106.5	70	20		High	High	High	High	High	Not Found	High	High	High	Peak Found	High	1.364e-05	1.648e-05	2.56	78.62	Used	Used	R.GNATVPAMEMTKWFDTNYHYIVPELGPDVK.F	[109-138]
	FALSE	High	[R].GTQSLELIK.[G]		0.00165598	0.000154279	1	1	29	1108923008	1108923008 [280-288]		0	988.567	25.4	44.6	14	51.4	74.4	189.1	159.1	104	166.6	171.4		High	High	High	Peak Found	High	High	High	High	High	High	High	2.424e-05	0.000171	1.57	15.96	Used	Used	R.GTQSLELIK.G	[280-288]
	FALSE	High	[R].GTQSLELIKGGFPSDKYLFAGVVDGR.[N]		0.000125154	9.51359e-05	1	1	3	1108923008	1108923008 [280-305]		2	2754.45	275.3	120.4	16.9	202	91.1	42.7	32.9		32.6	186		High	Peak Found	Peak Found	High	Peak Found	Peak Found	Peak Found	Not Found	Peak Found	Peak Found	High	1.364e-05	1.47e-05	3.07	55.64	Used	Used	R.GTQSLELIKGGFPSDKYLFAGVVDGR.N	[280-305]
	FALSE	High	[K].GVTGFGFDLIR.[G]		1.64681e-05	5.33751e-05	1	1	55	1108923008	1108923008 [269-279]		0	1181.63	16.7	18.8	42.3	119.5	103.3	194.2	109.9	176.6	102.1	116.6		High	High	High	High	High	High	High	High	High	High	High	7.23e-06	1.989e-06	2.36	55.67	Used	Used	K.GVTGFGFDLIR.G	[269-279]
	FALSE	High	[K].GVTGFGFDLIRGTQSLELIK.[G]		0.000216274	9.51359e-05	1	1	7	1108923008	1108923008 [269-288]		1	2151.18	235.4	45.9	15.8	131.7	155.8		71.9	87.4	156.7	99.4		High	Peak Found	Peak Found	High	Peak Found	Not Found	High	Peak Found	High	High	High	1.696e-05	2.475e-05	2.7	72.47	Used	Used	K.GVTGFGFDLIRGTQSLELIK.G	[269-288]
	FALSE	High	[R].HETCYQIALAIKDEVEDLEK.[A]	1xCarbamidomethyl [C4]	7.05233e-14	5.33751e-05	1	1	98	1108923008	1108923008 [586-605]		1	2404.17	1.9	27.1	318.2	87.8	49.4	166.7	155.8	52.6	65.7	74.8		Peak Found	High	High	High	High	High	High	High	High	High	High	7.23e-06	1.385e-14	6.9	109.65	Used	Used	R.HETCYQIALAIKDEVEDLEK.A	[586-605]
	FALSE	High	[R].HETCYQIALAIKDEVEDLEKAGINVIQIDEAALR.[E]	1xCarbamidomethyl [C4]	8.3106e-15	5.33751e-05	1	1	43	1108923008	1108923008 [586-619]		2	3867.98	27.7	52.1	187.4	83.2	132.1	139.2	78.7	106.9	102	90.6		Peak Found	High	High	High	High	High	High	High	High	High	High	7.23e-06	1.721e-15	5.18	109.49	Used	Used	R.HETCYQIALAIKDEVEDLEKAGINVIQIDEAALR.E	[586-619]
	FALSE	High	[K].KLNLPILPTTTIGSFPQTVELR.[R]		1.10407e-08	5.33751e-05	1	1	85	1108923008	1108923008 [435-456]		1	2438.4	181.4	103.6	81.1	124.5	29.3	79.2	74.9	147	87.9	91		High	High	High	High	High	High	High	High	High	High	High	7.23e-06	1.605e-09	5.39	64.81	Used	Used	K.KLNLPILPTTTIGSFPQTVELR.R	[435-456]
	FALSE	High	[K].KLNLPILPTTTIGSFPQTVELR.[R]	1xGG [K1]	0.00264617	0.000222105	1	1	2	1108923008	1108923008 [435-456]		1	2552.44		13.3		213.1		70			149.8	553.8		Not Found	Peak Found	Not Found	Peak Found	Not Found	Peak Found	Not Found	Not Found	High	High	High	3.769e-05	0.0002678	1.76	58.45	Used	Used	K.KLNLPILPTTTIGSFPQTVELR.R	[435-456]
	FALSE	High	[K].KLNLPILPTTTIGSFPQTVELRR.[V]		3.24776e-06	5.33751e-05	1	1	126	1108923008	1108923008 [435-457]		2	2594.5	226.8	86.2	102.5	157.8	103.2	53	58.2	93.1	70.4	48.9		High	High	High	High	High	High	High	High	High	High	High	7.23e-06	4.079e-07	5.68	107.41	Used	Used	K.KLNLPILPTTTIGSFPQTVELRR.V	[435-457]
	FALSE	High	[K].KLNLPILPTTTIGSFPQTVELRR.[V]	1xGG [K1]	0.0356061	0.00207425	1	1	1	1108923008	1108923008 [435-457]		2	2708.55						63.5		435.3	164.3	336.9		Not Found	Not Found	Not Found	Not Found	Not Found	Peak Found	Not Found	Peak Found	Peak Found	High	High	0.0003101	0.003672	2.63	49.53	Used	Used	K.KLNLPILPTTTIGSFPQTVELRR.V	[435-457]
	FALSE	High	[K].KISEEEYVK.[A]		6.14979e-05	5.33751e-05	1	1	44	1108923008	1108923008 [466-474]		1	1124.58	101.5	43	15.7	5.7	55.6	200.9	218.3	116.3	197.1	45.9		High	High	High	High	High	High	High	High	High	High	High	7.23e-06	7.263e-06	3	9.65	Used	Used	K.KISEEEYVK.A	[466-474]
	FALSE	High	[R].KMLAVLESNVLWVNPDCGLK.[T]	1xCarbamidomethyl [C17]	7.91177e-10	5.33751e-05	1	1	73	1108923008	1108923008 [726-745]		1	2286.2	62.8	157.7	118.7	149.6	39.9	91.1	98.3	109.1	102.8	69.9		High	High	High	High	High	High	High	High	High	High	High	7.23e-06	1.227e-10	5.35	60.93	Used	Used	R.KMLAVLESNVLWVNPDCGLK.T	[726-745]
	FALSE	High	[R].KMLAVLESNVLWVNPDCGLK.[T]	1xCarbamidomethyl [C17]; 1xOxidation [M2]	7.44816e-07	5.33751e-05	1	1	18	1108923008	1108923008 [726-745]		1	2302.19		26.6	9.5	252.5	167.3	59.3	17.7	134.9	113.2	218.9		Not Found	Peak Found	Peak Found	High	High	Peak Found	High	High	High	High	High	7.23e-06	9.707e-08	3.78	50.8	Used	Used	R.KMLAVLESNVLWVNPDCGLK.T	[726-745]
	FALSE	High	[R].KMLAVLESNVLWVNPDCGLKTR.[K]	1xCarbamidomethyl [C17]	2.60244e-05	5.33751e-05	1	1	3	1108923008	1108923008 [726-747]		2	2543.35				275.8			25.6	642.1	56.4			Not Found	Not Found	Not Found	High	Not Found	Not Found	Peak Found	High	Peak Found	Not Found	High	7.23e-06	3.119e-06	3.55	46.99	Used	Used	R.KMLAVLESNVLWVNPDCGLKTR.K	[726-747]
	FALSE	High	[R].KSEHGFYLK.[W]		0.000195957	9.51359e-05	1	1	16	1108923008	1108923008 [626-634]		1	1108.58	1.2	50.5	195.4		0.3	244.6	306.2	73.7	80.3	47.8		Peak Found	Peak Found	High	Not Found	Peak Found	High	High	High	High	High	High	1.696e-05	2.256e-05	2.74	95.39	Used	Used	R.KSEHGFYLK.W	[626-634]
	FALSE	High	[R].KYGEVQPALLNMVAAAK.[Q]		1.96155e-10	5.33751e-05	1	1	153	1108923008	1108923008 [748-764]		1	1802.98	115.4	98.6	94.5	122.3	223.7	50.9	79.2	85.7	70.7	58.9		High	High	High	High	High	High	High	High	High	High	High	7.23e-06	3.149e-11	4.62	40.68	Used	Used	R.KYGEVQPALLNMVAAAK.Q	[748-764]
	FALSE	High	[R].KYGEVQPALLNMVAAAK.[Q]	1xOxidation [M12]	4.88705e-08	5.33751e-05	1	1	30	1108923008	1108923008 [748-764]		1	1818.98	232.6	53.2	7.3	63	271.7	30	28.1	38.1	73.9	202		Peak Found	High	High	High	High	Peak Found	High	High	High	High	High	7.23e-06	6.841e-09	3.28	19.13	Used	Used	R.KYGEVQPALLNMVAAAK.Q	[748-764]
	FALSE	High	[K].LDDEIKSWLAFAAQK.[V]		3.70538e-05	5.33751e-05	1	1	4	1108923008	1108923008 [352-366]		1	1734.91		9.7	120.2	78.7	63.8	214.5	181	133	65.9	133.1		Not Found	Peak Found	Peak Found	High	Peak Found	High	Peak Found	High	Peak Found	High	High	7.23e-06	4.402e-06	3.09	64.7	Used	Used	K.LDDEIKSWLAFAAQK.V	[352-366]
	FALSE	High	[K].ILAIYKEVVTELK.[A]		5.40973e-06	5.33751e-05	1	1	41	1108923008	1108923008 [193-205]		1	1518.91		29.9	99	155.5	38.8	291.3	102	152	53	78.6		Not Found	High	High	High	High	High	High	High	High	High	High	7.23e-06	6.729e-07	2.22	49.14	Used	Used	K.ILAIYKEVVTELK.A	[193-205]
	FALSE	High	[KR].LLSVFR.[EK]		0.0230289	0.00150095	2	3	98	1108923008; 731348458	1108923008 [688-693]; 731348458 [731-736]		0	734.456	27.8	84.4	193.7	101.4	152.9	93.9	79.4	52.3	95.9	118.2	Shared	High	High	High	High	High	High	High	High	High	High	High	0.0002209	0.00237	1.11	17.33	Used	Used	K.LLSVFR.E	[688-693]
	FALSE	High	[K].LLSVFREGVK.[Y]		0.000109023	5.33751e-05	2	2	15	1108923008; 731348458	1108923008 [688-697]; 731348458 [731-740]		1	1147.68	361.2	226.8	0.4	21.6	240.9	18	19.9	32.3	40.8	38.1	Shared	High	High	Peak Found	Peak Found	High	Peak Found	High	High	High	High	High	7.23e-06	1.28e-05	1.92	23.27	Used	Used	K.LLSVFREGVK.Y	[688-697]
	FALSE	High	[K].LLSVFREGVKYGAGIGPGVYDIHSPR.[I]		0.000411589	0.000126394	2	2	1	1108923008; 731348458	1108923008 [688-713]; 731348458 [731-756]		2	2787.49	279	566.8			154.2						Shared	High	Peak Found	Not Found	Not Found	Peak Found	Not Found	Not Found	Not Found	Not Found	Not Found	High	1.859e-05	4.553e-05	2.9	44.71	Used	Used	K.LLSVFREGVKYGAGIGPGVYDIHSPR.I	[688-713]
	FALSE	High	[K].LNLPILPTTTIGSFPQTVELR.[R]		2.8387e-06	5.33751e-05	1	1	28	1108923008	1108923008 [436-456]		0	2310.31	225.5	215	9.4	72.7	37.1	25.7	41.2	204.6	76.2	92.8		High	High	Peak Found	High	High	Peak Found	High	High	High	High	High	7.23e-06	3.588e-07	2.21	78.44	Used	Used	K.LNLPILPTTTIGSFPQTVELR.R	[436-456]
	FALSE	High	[K].LNLPILPTTTIGSFPQTVELRR.[V]		2.70798e-08	5.33751e-05	1	1	53	1108923008	1108923008 [436-457]		1	2466.41	277.9	106	60.3	118.6	62	53.7	73	99.4	77.6	71.6		High	High	High	High	High	High	High	High	High	High	High	7.23e-06	3.849e-09	4.37	65.36	Used	Used	K.LNLPILPTTTIGSFPQTVELRR.V	[436-457]
	FALSE	High	[R].IPPTEEIADR.[I]		0.000488566	0.000126394	1	1	34	1108923008	1108923008 [714-723]		0	1140.59	32	48.4	49.9	32.5	61.8	209.8	146	73.9	115.7	229.9		High	High	Peak Found	High	High	High	High	High	High	High	High	1.859e-05	5.348e-05	1.44	11.74	Used	Used	R.IPPTEEIADR.I	[714-723]
	FALSE	High	[R].IPPTEEIADRIR.[K]		1.58736e-05	5.33751e-05	1	1	114	1108923008	1108923008 [714-725]		1	1409.77	113.8	118.5	114.5	113	145.2	85.7	56.2	60.6	64.3	128.1		High	High	High	High	High	High	High	High	High	High	High	7.23e-06	1.923e-06	2.77	22.1	Used	Used	R.IPPTEEIADRIR.K	[714-725]
	FALSE	High	[R].IPPTEEIADRIRK.[M]		0.00290604	0.000222105	1	1	3	1108923008	1108923008 [714-726]		2	1537.87	308.2	85.6	40.7	485.4	2.5		11.2	42.9	19.1	4.5		High	High	Peak Found	High	Peak Found	Not Found	Peak Found	Peak Found	Peak Found	Peak Found	High	3.769e-05	0.0002929	3.57	16.01	Used	Used	R.IPPTEEIADRIRK.M	[714-726]
	FALSE	High	[K].LQAFTDAYAELESTLSGLNVIVETYFADVTPEAYK.[T]		8.52279e-07	5.33751e-05	1	1	9	1108923008	1108923008 [228-262]		0	3868.91		100.9	99.3		701.2					98.5		Not Found	Peak Found	Peak Found	Not Found	High	High	Not Found	Not Found	Not Found	High	High	7.23e-06	1.11e-07	2.44	109.54	Used	Used	K.LQAFTDAYAELESTLSGLNVIVETYFADVTPEAYK.T	[228-262]
	FALSE	High	[K].ISEEEYVK.[A]		0.000289695	0.000126394	1	1	23	1108923008	1108923008 [467-474]		0	996.488	74.2	49.9	37.8	47.5	30.1	173.7	159.7	89.6	150.3	187.3		High	High	High	High	High	High	High	High	High	High	High	1.859e-05	3.266e-05	1.38	10.68	Used	Used	K.ISEEEYVK.A	[467-474]
	FALSE	High	[K].LVVSTSCSLLHTAVDLVNETKLDDEIK.[S]	1xCarbamidomethyl [C7]	0.000810959	0.000154279	1	1	1	1108923008	1108923008 [331-357]		1	2999.56	115.5	145.9	430			143.5	165.1					Peak Found	Peak Found	Peak Found	Not Found	Not Found	Peak Found	High	Not Found	Not Found	Not Found	High	2.424e-05	8.698e-05	3.05	109.97	Used	Used	K.LVVSTSCSLLHTAVDLVNETKLDDEIK.S	[331-357]
	FALSE	High	[K].LVVSTSCSLLHTAVDLVNETKLDDEIKSWLAFAAQK.[V]	1xCarbamidomethyl [C7]	3.15697e-08	5.33751e-05	1	1	28	1108923008	1108923008 [331-366]		2	4002.09	0.5	28.3	88	51.7	161	155.1	124	113.7	183.6	94		Peak Found	High	High	High	High	High	High	High	High	High	High	7.23e-06	4.462e-09	6.22	107.7	Used	Used	K.LVVSTSCSLLHTAVDLVNETKLDDEIKSWLAFAAQK.V	[331-366]
	FALSE	High	[-].MASGSSSSEMASHIVGYPR.[M]	1xMet-loss+Acetyl [N-Term]	2.41029e-11	5.33751e-05	1	1	172	1108923008	1108923008 [1-19]	1108923008 1xMet-loss+Acetyl [N-Term]	0	1864.85	188.7	139.9	26.1	45.1	78.3	60.8	95.3	151.3	98	116.5		High	High	High	High	High	High	High	High	High	High	High	7.23e-06	4.084e-12	5.4	27.33	Used	Used	-.MASGSSSSEMASHIVGYPR.M	[1-19]
	FALSE	High	[-].MASGSSSSEMASHIVGYPR.[M]	1xOxidation [M10]; 1xMet-loss+Acetyl [N-Term]	4.67946e-07	5.33751e-05	1	1	22	1108923008	1108923008 [1-19]	1108923008 1xMet-loss+Acetyl [N-Term]	0	1880.84	121.1	52.5		4.1	14.4	89	56.5	31.3	38.5	592.5		High	High	Not Found	Peak Found	Peak Found	High	High	High	High	High	High	7.23e-06	6.176e-08	3.65	14.46	Used	Used	-.MASGSSSSEMASHIVGYPR.M	[1-19]
	FALSE	High	[K].MLAVLESNVLWVNPDCGLK.[T]	1xCarbamidomethyl [C16]	1.36097e-08	5.33751e-05	1	1	63	1108923008	1108923008 [727-745]		0	2158.1	67	173.6	62.1	127.8	31.8	82.4	100.9	167	136.6	50.7		High	High	High	High	High	High	High	High	High	High	High	7.23e-06	1.967e-09	4.14	73.98	Used	Used	K.MLAVLESNVLWVNPDCGLK.T	[727-745]
	FALSE	High	[K].MLAVLESNVLWVNPDCGLK.[T]	1xCarbamidomethyl [C16]; 1xOxidation [M1]	0.000250313	9.51359e-05	1	1	6	1108923008	1108923008 [727-745]		0	2174.1				233.1	101.5	53.4		223.4	218.5	170.2		Not Found	Not Found	Not Found	High	Peak Found	Peak Found	Not Found	High	High	High	High	1.696e-05	2.845e-05	1.72	67.66	Used	Used	K.MLAVLESNVLWVNPDCGLK.T	[727-745]
	FALSE	High	[R].NDQPRHETCYQIALAIKDEVEDLEK.[A]	1xCarbamidomethyl [C9]	1.53094e-09	5.33751e-05	1	1	33	1108923008	1108923008 [581-605]		2	3014.45		51.1	270	94.1	86.3	179.6	88.2	18.3	183.4	29.1		Not Found	High	High	High	Peak Found	High	High	High	High	High	High	7.23e-06	2.335e-10	5.49	98.38	Used	Used	R.NDQPRHETCYQIALAIKDEVEDLEK.A	[581-605]
	FALSE	High	[R].NIWANDLAASLALLQSLQGLVGK.[D]		1.94878e-06	5.33751e-05	1	1	10	1108923008	1108923008 [306-328]		0	2395.33	9.1	4	57.1	9.3	295.4	64.3	90.8	361.8	18.6	89.7		Peak Found	Peak Found	Peak Found	Peak Found	High	High	High	High	High	High	High	7.23e-06	2.488e-07	4.95	112.08	Used	Used	R.NIWANDLAASLALLQSLQGLVGK.D	[306-328]
	FALSE	High	[R].NIWANDLAASLALLQSLQGLVGKDK.[L]		5.00936e-09	5.33751e-05	1	1	41	1108923008	1108923008 [306-330]		1	2638.46	20.4	13.7	59.9	49.4	132.4	92.3	105.8	267.4	178.2	80.5		High	High	High	High	High	High	High	High	High	High	High	7.23e-06	7.422e-10	4.38	108.94	Used	Used	R.NIWANDLAASLALLQSLQGLVGKDK.L	[306-330]
	FALSE	High	[K].QLRQELASAK.[-]		0.000401667	0.000126394	1	1	51	1108923008	1108923008 [765-774]		1	1143.65	161.7	46.5	3.6	3.9	21.1	111.9	241.8	138.6	258.9	12.1		High	High	High	Peak Found	High	High	High	High	High	High	High	1.859e-05	4.458e-05	3.4	9.43	Used	Used	K.QLRQELASAK.-	[765-774]
	FALSE	High	[K].QLRQELASAK.[-]	1xGG [K10]	0.0682826	0.00357702	1	1	4	1108923008	1108923008 [765-774]		1	1257.69	64.1	49.3	398.4			197.1	140.7	41.6	108.9			Peak Found	Peak Found	High	Not Found	Not Found	Peak Found	High	High	High	Not Found	High	0.0005199	0.007135	2.86	9.83	Used	Used	K.QLRQELASAK.-	[765-774]
	FALSE	High	[K].QMSDAGIKYIPSNTFAYYDQVLDTTAMLGAVPPR.[Y]		9.5284e-07	5.33751e-05	1	1	24	1108923008	1108923008 [57-90]		1	3733.82	374.2	292		101.8	47.5		23	86.9	74.6			High	High	Not Found	High	Peak Found	Not Found	High	High	High	Not Found	High	7.23e-06	1.236e-07	3.9	86.9	Used	Used	K.QMSDAGIKYIPSNTFAYYDQVLDTTAMLGAVPPR.Y	[57-90]
	FALSE	High	[R].RATNVSARLDAQQK.[K]		0.0976914	0.00497252	1	1	1	1108923008	1108923008 [421-434]		2	1557.85	771.8								177.4	50.8		High	Not Found	Not Found	Not Found	Not Found	Not Found	Not Found	Not Found	Peak Found	Peak Found	High	0.0007162	0.01061	2.6	9.45	Used	Used	R.RATNVSARLDAQQK.K	[421-434]
	FALSE	High	[R].SDEKLLSVFR.[E]		0.000159984	9.51359e-05	2	2	87	1108923008; 731348458	1108923008 [684-693]; 731348458 [727-736]		1	1193.65	79.2	127.9	47	151.5	162.2	121.7	69.4	77.4	85.8	77.9	Shared	High	High	High	High	High	High	High	High	High	High	High	1.696e-05	1.864e-05	2.46	29.58	Used	Used	R.SDEKLLSVFR.E	[684-693]
	FALSE	High	[R].SDEKLLSVFREGVK.[Y]		5.00197e-08	5.33751e-05	2	2	13	1108923008; 731348458	1108923008 [684-697]; 731348458 [727-740]		2	1606.88	271	224.8	4	264.4	41.9	23.8	13.3	24.7	100.7	31.3	Shared	High	High	Peak Found	High	High	Peak Found	Peak Found	Peak Found	High	High	High	7.23e-06	6.98e-09	5.16	28.77	Used	Used	R.SDEKLLSVFREGVK.Y	[684-697]
	FALSE	High	[K].SEHGFYLK.[W]		0.000736462	0.000154279	1	1	21	1108923008	1108923008 [627-634]		0	980.484		7.5	40.6	119.2	115.5	164.6	235.7	91.8	130.4	94.7		Not Found	High	High	High	High	High	High	High	High	High	High	2.258e-05	7.904e-05	1.83	11.01	Used	Used	K.SEHGFYLK.W	[627-634]
	FALSE	High	[K].SEHGFYLKWAVHSFR.[I]		0.000236993	9.51359e-05	1	1	3	1108923008	1108923008 [627-641]		1	1863.93						28.6	42.2	871	25.7	32.6		Not Found	Not Found	Not Found	Not Found	Not Found	Peak Found	Peak Found	High	Peak Found	Peak Found	High	1.696e-05	2.698e-05	1.74	26.66	Used	Used	K.SEHGFYLKWAVHSFR.I	[627-641]
	FALSE	High	[K].SFNLLSLLPK.[I]		0.000231126	9.51359e-05	1	1	52	1108923008	1108923008 [183-192]		0	1131.68	1.8	15.9	483	29	73.8	121.4	53.2	101.9	55.2	64.8		Peak Found	High	High	High	High	High	High	High	High	High	High	1.696e-05	2.639e-05	1.84	69.08	Used	Used	K.SFNLLSLLPK.I	[183-192]
	FALSE	High	[K].SFNLLSLLPKILAIYKEVVTELK.[A]		1.09732e-07	5.33751e-05	1	1	11	1108923008	1108923008 [183-205]		2	2631.57		10.9	127.5	258.3	253		157.4		192.9			Not Found	High	High	High	Peak Found	High	High	Not Found	High	High	High	7.23e-06	1.505e-08	4.02	112.07	Used	Used	K.SFNLLSLLPKILAIYKEVVTELK.A	[183-205]
	FALSE	High	[R].SSIWKQMSDAGIK.[Y]		5.15717e-05	5.33751e-05	1	1	1	1108923008	1108923008 [52-64]		1	1450.74	321	633.5	45.5									Peak Found	High	Peak Found	Not Found	Not Found	Not Found	Not Found	Not Found	Not Found	Not Found	High	7.23e-06	6.117e-06	2.52	27.64	Used	Used	R.SSIWKQMSDAGIK.Y	[52-64]
	FALSE	High	[R].SSIWKQMSDAGIKYIPSNTFAYYDQVLDTTAMLGAVPPR.[Y]		9.5595e-06	5.33751e-05	1	1	1	1108923008	1108923008 [52-90]		2	4335.15											No Quan Values	High	Not Found	Not Found	Not Found	Not Found	Not Found	Not Found	Not Found	Not Found	Not Found	High	7.23e-06	1.173e-06	3.67		Not Used	Not Used	R.SSIWKQMSDAGIKYIPSNTFAYYDQVLDTTAMLGAVPPR.Y	[52-90]
	FALSE	High	[K].SWLAFAAQK.[VI]		0.000332713	0.000126394	2	2	25	1108923008; 731348458	1108923008 [358-366]; 731348458 [401-409]		0	1021.55	19.5	52.9	87.1	134	73.1	118.3	101.2	161.9	155.2	96.7	Shared	Peak Found	High	High	High	High	High	High	High	High	High	High	1.859e-05	3.72e-05	1.39	32.88	Used	Used	K.SWLAFAAQK.V	[358-366]
	FALSE	High	[K].TLISLKGVTGFGFDLIR.[G]		1.9426e-05	5.33751e-05	1	1	3	1108923008	1108923008 [263-279]		1	1837.06			226.6	116.8					656.6			Not Found	Not Found	High	High	Not Found	Not Found	Not Found	Not Found	High	Not Found	High	7.23e-06	2.346e-06	3.35	71.26	Used	Used	K.TLISLKGVTGFGFDLIR.G	[263-279]
	FALSE	High	[K].TRKYGEVQPALLNMVAAAK.[Q]		0.000200008	9.51359e-05	1	1	5	1108923008	1108923008 [746-764]		2	2060.13	217.3	151.1		93.7	401.2	24	11.2	58.6		42.9		High	Peak Found	Not Found	High	High	Peak Found	Peak Found	Peak Found	Not Found	Peak Found	High	1.696e-05	2.302e-05	3.46	33.85	Used	Used	K.TRKYGEVQPALLNMVAAAK.Q	[746-764]
	FALSE	High	[R].VNNEAVQKAAAGLK.[G]		7.20975e-07	5.33751e-05	1	1	34	1108923008	1108923008 [402-415]		1	1412.79	89.9	15.8	12.4	154.4	48.8	49.7	157.4	157.2	170.3	144.1		High	Peak Found	Peak Found	High	High	Peak Found	High	High	High	High	High	7.23e-06	9.402e-08	2.81	10.92	Used	Used	R.VNNEAVQKAAAGLK.G	[402-415]
	FALSE	High	[R].VNNEAVQKAAAGLK.[G]	1xGG [K8]	8.28842e-07	5.33751e-05	1	1	12	1108923008	1108923008 [402-415]		1	1526.83	2.9	88.8	351.2	8.5	22.8	135.9	163.8	33.3	63.9	129		Peak Found	High	High	Peak Found	Peak Found	Peak Found	High	Peak Found	High	Peak Found	High	7.23e-06	1.077e-07	3.02	10.35	Used	Used	R.VNNEAVQKAAAGLK.G	[402-415]
	FALSE	High	[R].VNNEAVQKAAAGLKGSDHR.[R]		5.48547e-06	5.33751e-05	1	1	6	1108923008	1108923008 [402-420]		2	1965.03	182.1			237.6	348.2		40.7	135.2		56.3		High	Not Found	Not Found	High	Peak Found	Not Found	High	High	Not Found	Peak Found	High	7.23e-06	6.815e-07	3.4	8.82	Used	Used	R.VNNEAVQKAAAGLKGSDHR.R	[402-420]
	FALSE	High	[K].VSADLRSSIWK.[Q]		0.0138802	0.000935615	1	1	1	1108923008	1108923008 [46-56]		1	1261.69	853.2		2.3		106.5		9	9.9		19.1		High	Not Found	Peak Found	Not Found	Peak Found	Not Found	Peak Found	Peak Found	Not Found	Peak Found	High	0.0001355	0.001424	2.01	20.77	Used	Used	K.VSADLRSSIWK.Q	[46-56]
	FALSE	High	[K].VVEVNALAK.[A]		0.000306798	0.000126394	1	1	38	1108923008	1108923008 [367-375]		0	942.562	43.8	72	31.9	36.1	50.1	172.5	127.2	127.3	130.1	208.9		High	High	High	High	High	High	High	High	High	High	High	1.859e-05	3.446e-05	1.83	12	Used	Used	K.VVEVNALAK.A	[367-375]
	FALSE	High	[K].WAVHSFR.[I]		0.0116296	0.000882483	1	1	63	1108923008	1108923008 [635-641]		0	902.463	2.4	34.1	164.3	153.2	80.9	135.9	154.6	72	100.3	102.4		High	High	High	High	High	High	High	High	High	High	High	0.0001254	0.001196	2.2	12.22	Used	Used	K.WAVHSFR.I	[635-641]
	FALSE	High	[K].WFDTNYHYIVPELGPDVK.[F]		1.01394e-07	5.33751e-05	1	1	111	1108923008	1108923008 [121-138]		0	2193.07	63	60.4	99.4	114.4	81.5	220	102.1	79.1	73.6	106.5		High	High	High	High	High	High	High	High	High	High	High	7.23e-06	1.39e-08	5.24	57.52	Used	Used	K.WFDTNYHYIVPELGPDVK.F	[121-138]
	FALSE	High	[K].WFDTNYHYIVPELGPDVKFSYASHK.[A]		1.92581e-07	5.33751e-05	1	1	11	1108923008	1108923008 [121-145]		1	3013.45	651.4			49	29.2		27.5	49.6	169	24.3		High	Not Found	Not Found	High	Peak Found	Not Found	High	High	High	Peak Found	High	7.23e-06	2.605e-08	4.9	52.99	Used	Used	K.WFDTNYHYIVPELGPDVKFSYASHK.A	[121-145]
	FALSE	High	[K].YGAGIGPGVYDIHSPR.[I]		1.25172e-08	5.33751e-05	2	2	169	1108923008; 731348458	1108923008 [698-713]; 731348458 [741-756]		0	1658.83	93	104.4	92.2	101.7	135.1	101.8	89.7	60.7	85.8	135.7	Shared	High	High	High	High	High	High	High	High	High	High	High	7.23e-06	1.814e-09	5	23.73	Used	Used	K.YGAGIGPGVYDIHSPR.I	[698-713]
	FALSE	High	[K].YGAGIGPGVYDIHSPRIPPTEEIADR.[I]		4.25072e-06	5.33751e-05	1	1	2	1108923008	1108923008 [698-723]		1	2780.4	125.1	434.3			440.6							Peak Found	High	Not Found	Not Found	High	Not Found	Not Found	Not Found	Not Found	Not Found	High	7.23e-06	5.317e-07	3.67	34.1	Used	Used	K.YGAGIGPGVYDIHSPRIPPTEEIADR.I	[698-723]
	FALSE	High	[K].YGAGIGPGVYDIHSPRIPPTEEIADRIR.[K]		3.12297e-07	5.33751e-05	1	1	7	1108923008	1108923008 [698-725]		2	3049.59	141.1	95.9		28.4	642.3		17.6	33.2	29.3	12.2		High	High	Not Found	High	High	Not Found	Peak Found	Peak Found	Peak Found	Peak Found	High	7.23e-06	4.175e-08	4.1	39.3	Used	Used	K.YGAGIGPGVYDIHSPRIPPTEEIADRIR.K	[698-725]
	FALSE	High	[K].YGEVQPALLNMVAAAK.[Q]		7.87535e-07	5.33751e-05	1	1	61	1108923008	1108923008 [749-764]		0	1674.89	226.4	193	12.2	126	73.3	62.8	58.6	95.4	98.9	53.5		High	High	High	High	High	High	High	High	High	High	High	7.23e-06	1.027e-07	2.74	53.87	Used	Used	K.YGEVQPALLNMVAAAK.Q	[749-764]
	FALSE	High	[K].YGEVQPALLNMVAAAK.[Q]	1xOxidation [M11]	0.000343571	0.000126394	1	1	5	1108923008	1108923008 [749-764]		0	1690.88	67.4	97.4		56.1	21.9	203.5	163.6	59.6	100.2	230.4		High	High	Not Found	Peak Found	Peak Found	Peak Found	High	High	Peak Found	High	High	1.859e-05	3.835e-05	1.85	18.83	Used	Used	K.YGEVQPALLNMVAAAK.Q	[749-764]
	FALSE	High	[K].YGEVQPALLNMVAAAKQLRQELASAK.[-]		1.97613e-06	5.33751e-05	1	1	4	1108923008	1108923008 [749-774]		2	2799.52	231.1			257.7			158.8	38.4	246.1	68		High	Not Found	Not Found	High	Not Found	Not Found	High	Peak Found	Peak Found	Peak Found	High	7.23e-06	2.513e-07	4.04	77.29	Used	Used	K.YGEVQPALLNMVAAAKQLRQELASAK.-	[749-774]
	FALSE	High	[K].YLFAGVVDGR.[N]		4.91167e-05	5.33751e-05	2	2	85	1108923008; 731348458	1108923008 [296-305]; 731348458 [339-348]		0	1096.58	50.6	72.7	96.1	136.8	106.7	123.1	64.7	149.8	97.5	102	Shared	Peak Found	High	High	High	High	High	High	High	High	High	High	7.23e-06	5.809e-06	2.12	35.76	Used	Used	K.YLFAGVVDGR.N	[296-305]
	FALSE	High	[K].YIPSNTFAYYDQVLDTTAMLGAVPPR.[Y]		3.89153e-08	5.33751e-05	1	1	205	1108923008	1108923008 [65-90]		0	2903.43	50.1	157.7	126.9	63.9	56.3	79.4	92.6	156.4	121.4	95.3		High	High	High	High	High	High	High	High	High	High	High	7.23e-06	5.483e-09	4.31	90.91	Used	Used	K.YIPSNTFAYYDQVLDTTAMLGAVPPR.Y	[65-90]
	FALSE	High	[K].YIPSNTFAYYDQVLDTTAMLGAVPPR.[Y]	1xOxidation [M19]	0.000973248	0.000154279	1	1	5	1108923008	1108923008 [65-90]		0	2919.42		17.1	49.2		70	21.3		179.9	288.3	374.3		Not Found	Peak Found	Peak Found	Not Found	High	High	Not Found	Peak Found	Peak Found	High	High	2.424e-05	0.0001032	1.17	89.53	Used	Used	K.YIPSNTFAYYDQVLDTTAMLGAVPPR.Y	[65-90]
FALSE		High	Master Protein	-8098168038898184154	264	731345323	PREDICTED: fructose-bisphosphate aldolase, cytoplasmic isozyme [Beta vulgaris subsp. vulgaris]	MTAYRGKYADELIANAAYIATPGKGILAADESTGTIGKRFASINVENVEDNRRALRELLFTTPGALQYLSGVILFEETLYQKTAAGKLFVDVMKEGGVLPGIKVDKGTIELAGTNGETTTQGLDNLGKRCAEYYAAGARFAKWRAVLKIGPNEPSPLAILENANGLARYAIICQENGLVPIVEPEILVDGSHDIDRCAEVSERVLAACYKSLNDHHVLLEGTLLKPNMVTPGSDSKKVANDVIAEYTVRTLQRTVPPAVPGIMFLSGGQSEEEATLNLNAMNKLQAKKPWTLSFSYGRALQQSTLKAWSGKEENVSKAQEVFLARAKANSEATLGKYQGGAAGADASESLHVKDYKY	>gi|731345323|ref|XP_010683863.1| PREDICTED: fructose-bisphosphate aldolase, cytoplasmic isozyme [Beta vulgaris subsp. vulgaris]	0	1017.78	100	58	3661	55	55	357	38.5	6.58	10296.9	100	3661	58	4	124.5	113	85.6	103.6	91.1	86.8	84.1	131.2	86.1	94.1	6.58014e+09	1.21316e+10	5.6842e+09	5.65872e+09	1.90664e+09	7.67137e+09	3.81159e+09	8.37446e+09	6.74107e+09	7.09259e+09	1.33726e+10	1.21316e+10	9.19282e+09	1.11268e+10	9.78155e+09
	Checked	Confidence	Annotated Sequence	Modifications	Qvality PEP	Qvality q-value	# Protein Groups	# Proteins	# PSMs	Master Protein Accessions	Positions in Master Proteins	Modifications in Master Proteins	# Missed Cleavages	Theo. MH+ [Da]	Abundances (Scaled): F1: Control	Abundances (Scaled): F2: Control	Abundances (Scaled): F3: Control	Abundances (Scaled): F4: Control	Abundances (Scaled): F5: Control	Abundances (Scaled): F6: Sample	Abundances (Scaled): F7: Sample	Abundances (Scaled): F8: Sample	Abundances (Scaled): F9: Sample	Abundances (Scaled): F10: Sample	Quan Info	Found in Sample: [S1] F1: Control	Found in Sample: [S2] F2: Control	Found in Sample: [S3] F3: Control	Found in Sample: [S4] F4: Control	Found in Sample: [S5] F5: Control	Found in Sample: [S6] F6: Sample	Found in Sample: [S7] F7: Sample	Found in Sample: [S8] F8: Sample	Found in Sample: [S9] F9: Sample	Found in Sample: [S10] F10: Sample	Confidence (by Search Engine): Sequest HT	Percolator q-Value (by Search Engine): Sequest HT	Percolator PEP (by Search Engine): Sequest HT	XCorr (by Search Engine): Sequest HT	Top Apex RT [min]	Quan Usage	Quan Ratio Usage	Sequence in Protein	Positions in Proteins
	FALSE	High	[R].AKANSEATLGKYQGGAAGADASESLHVK.[D]		9.61528e-13	5.33751e-05	1	1	27	731345323	731345323 [326-353]		2	2731.36	247.2	105.8	226.8	120.2	127.5	24.3	48.5	25.1	19.1	55.4		High	High	High	High	High	Peak Found	High	High	High	High	High	7.23e-06	1.765e-13	7.29	8.81	Used	Used	R.AKANSEATLGKYQGGAAGADASESLHVK.D	[326-353]
	FALSE	High	[R].AKANSEATLGKYQGGAAGADASESLHVK.[D]	1xGG [K11]	1.08373e-08	5.33751e-05	1	1	6	731345323	731345323 [326-353]		2	2845.41		157.9	642.7	5.6		134.2	23.5		36			Not Found	High	High	Peak Found	Not Found	Peak Found	Peak Found	Not Found	Peak Found	Not Found	High	7.23e-06	1.571e-09	5.91	11.3	Used	Used	R.AKANSEATLGKYQGGAAGADASESLHVK.D	[326-353]
	FALSE	High	[R].ALQQSTLKAWSGKEENVSK.[A]		6.06119e-09	5.33751e-05	1	1	63	731345323	731345323 [299-317]		2	2104.1	243.4	107.9	36.9	150.3	229	7.8	59	54.6	53.9	57.2		High	High	High	High	High	High	High	High	High	High	High	7.23e-06	8.935e-10	6.6	11.87	Used	Used	R.ALQQSTLKAWSGKEENVSK.A	[299-317]
	FALSE	High	[R].ALQQSTLKAWSGKEENVSK.[A]	1xGG [K/S/T]	2.76745e-07	5.33751e-05	1	1	37	731345323	731345323 [299-317]		2	2218.15	4	84.8	426.6	13.4	8.7	132.8	135.3	24.3	83.2	86.9		High	High	High	High	High	High	High	High	High	High	High	7.23e-06	3.709e-08	5.08	12.02	Used	Used	R.ALQQSTLKAWSGKEENVSK.A	[299-317]
	FALSE	High	[R].ALRELLFTTPGALQYLSGVILFEETLYQK.[T]		3.20602e-09	5.33751e-05	1	1	62	731345323	731345323 [54-82]		1	3313.81	175.8	113.8	77.6	69.5	172.8	30.8	37.5	107.8	120.2	94.2		High	High	High	High	High	High	High	High	High	High	High	7.23e-06	4.798e-10	5.82	109.61	Used	Used	R.ALRELLFTTPGALQYLSGVILFEETLYQK.T	[54-82]
	FALSE	High	[R].ALRELLFTTPGALQYLSGVILFEETLYQKTAAGK.[L]		4.57196e-07	5.33751e-05	1	1	7	731345323	731345323 [54-87]		2	3742.05		169.9	104.9	161.1	197.1		64.1	130.2	13.7	159.1		Not Found	High	High	Peak Found	Peak Found	Not Found	Peak Found	High	High	High	High	7.23e-06	6.037e-08	5.8	112.15	Used	Used	R.ALRELLFTTPGALQYLSGVILFEETLYQKTAAGK.L	[54-87]
	FALSE	High	[K].ANSEATLGKYQGGAAGADASESLHVK.[D]		2.74536e-11	5.33751e-05	1	1	22	731345323	731345323 [328-353]		1	2532.23	336	128.7	124.5	65.9	102.7	35.9	34.6	66.5	36.7	68.5		High	High	High	High	High	High	Peak Found	High	High	High	High	7.23e-06	4.638e-12	5.17	9.6	Used	Used	K.ANSEATLGKYQGGAAGADASESLHVK.D	[328-353]
	FALSE	High	[K].ANSEATLGKYQGGAAGADASESLHVK.[D]	1xGG [K/T]	4.74516e-07	5.33751e-05	1	1	6	731345323	731345323 [328-353]		1	2646.28		89.7	697.6			58.6				154.2		Not Found	High	High	Not Found	Not Found	Peak Found	Not Found	Not Found	Not Found	Peak Found	High	7.23e-06	6.257e-08	3.19	12.59	Used	Used	K.ANSEATLGKYQGGAAGADASESLHVK.D	[328-353]
	FALSE	High	[K].ANSEATLGKYQGGAAGADASESLHVKDYK.[Y]		0.000666889	0.000126394	1	1	1	731345323	731345323 [328-356]		2	2938.42	99.6		392.8		429.6					77.9		Peak Found	Not Found	Peak Found	Not Found	High	Not Found	Not Found	Not Found	Not Found	Peak Found	High	1.859e-05	7.203e-05	2.29	10.05	Used	Used	K.ANSEATLGKYQGGAAGADASESLHVKDYK.Y	[328-356]
	FALSE	High	[K].AQEVFLAR.[AC]		0.000269114	9.51359e-05	2	2	66	731345323; 731330405	731345323 [318-325]; 731330405 [318-325]		0	933.515	83.2	59.7	92.7	45.7	72.4	116.8	149.3	72.8	142.8	164.7	Shared	High	High	High	High	High	High	High	High	High	High	High	1.696e-05	3.046e-05	1.51	13.41	Used	Used	K.AQEVFLAR.A	[318-325]
	FALSE	High	[R].AVLKIGPNEPSPLAILENANGLAR.[Y]		5.15105e-09	5.33751e-05	1	1	55	731345323	731345323 [145-168]		1	2457.38	245.8	118.5	107.9	114.5	42.9	47.3	88.3	76.7	75.8	82.2		High	High	Peak Found	High	High	High	High	High	High	High	High	7.23e-06	7.618e-10	5.5	104.59	Used	Used	R.AVLKIGPNEPSPLAILENANGLAR.Y	[145-168]
	FALSE	High	[K].AWSGKEENVSK.[A]		4.63571e-05	5.33751e-05	1	1	20	731345323	731345323 [307-317]		1	1234.61	28.1	1.5	7.5	0.5		432.8	481.9	30.1	12.4	5.2		Peak Found	Peak Found	Peak Found	Peak Found	Not Found	High	High	Peak Found	Peak Found	High	High	7.23e-06	5.495e-06	3.28	9.69	Used	Used	K.AWSGKEENVSK.A	[307-317]
	FALSE	High	[K].AWSGKEENVSKAQEVFLAR.[A]		2.93499e-09	5.33751e-05	1	1	122	731345323	731345323 [307-325]		2	2149.1	173.2	192.8	6	257.7	58.2	10.6	100.6	77.8	59.9	63.2		High	High	High	High	High	High	High	High	High	High	High	7.23e-06	4.409e-10	5.57	23.61	Used	Used	K.AWSGKEENVSKAQEVFLAR.A	[307-325]
	FALSE	High	[K].AWSGKEENVSKAQEVFLAR.[A]	1xGG [K/S]	0.000123647	9.51359e-05	1	1	10	731345323	731345323 [307-325]		2	2263.15		120.2	252.7	7.5	10.4	190.7	157.7	13.6	66.2	180.9		Not Found	High	High	Peak Found	Peak Found	Peak Found	Peak Found	Peak Found	Peak Found	High	High	1.364e-05	1.453e-05	2.63	18.41	Used	Used	K.AWSGKEENVSKAQEVFLAR.A	[307-325]
	FALSE	High	[R].CAEVSERVLAACYK.[S]	2xCarbamidomethyl [C1; C12]	6.75557e-07	5.33751e-05	1	1	4	731345323	731345323 [197-210]		1	1655.79				565.9		17.5	51.6	199.4	89.4	76.1		Not Found	Not Found	Not Found	High	Not Found	Peak Found	Peak Found	High	Peak Found	Peak Found	High	7.23e-06	8.844e-08	3.85	13.27	Used	Used	R.CAEVSERVLAACYK.S	[197-210]
	FALSE	High	[R].CAEYYAAGAR.[F]	1xCarbamidomethyl [C1]	5.86048e-05	5.33751e-05	1	1	41	731345323	731345323 [130-139]		0	1131.49	3.5	41.1	93.3	29.5	15.6	176	241.7	91	168.6	139.8		Peak Found	High	High	High	High	High	High	High	High	High	High	7.23e-06	6.933e-06	2.4	10.32	Used	Used	R.CAEYYAAGAR.F	[130-139]
	FALSE	High	[R].CAEYYAAGARFAKWR.[A]	1xCarbamidomethyl [C1]	0.00144398	0.000154279	1	1	2	731345323	731345323 [130-144]		2	1819.87	4.6	6.4	17.3	43.1	76.9	164.7	234.5	106.1	165.4	181		Peak Found	Peak Found	Peak Found	Peak Found	Peak Found	Peak Found	Peak Found	High	Peak Found	Peak Found	High	2.424e-05	0.00015	2.11	19.43	Used	Used	R.CAEYYAAGARFAKWR.A	[130-144]
	FALSE	High	[K].EGGVLPGIK.[V]		0.000736462	0.000154279	1	1	36	731345323	731345323 [95-103]		0	869.509		11.6	5.1	69.4	47.9	212.4	214.8	107.9	179.7	151.3		High	High	High	High	High	High	High	High	High	High	High	2.258e-05	7.905e-05	1.49	14.3	Used	Used	K.EGGVLPGIK.V	[95-103]
	FALSE	High	[K].EGGVLPGIKVDK.[G]		0.000781908	0.000154279	1	1	15	731345323	731345323 [95-106]		1	1211.7	84.4	72.7		15.8	61.9	190.7	155.4	141.5	133.2	144.5		High	High	Not Found	Peak Found	Peak Found	High	High	High	High	High	High	2.258e-05	8.362e-05	2.32	13.02	Used	Used	K.EGGVLPGIKVDK.G	[95-106]
	FALSE	High	[R].ELLFTTPGALQYLSGVILFEETLYQK.[T]		2.27662e-07	5.33751e-05	1	1	66	731345323	731345323 [57-82]		0	2973.59	30.8	32	54.9	122.3	116.8	37.3	85	362.7	96.5	61.7		High	High	High	High	High	High	High	High	High	High	High	7.23e-06	3.056e-08	5.46	108.59	Used	Used	R.ELLFTTPGALQYLSGVILFEETLYQK.T	[57-82]
	FALSE	High	[R].ELLFTTPGALQYLSGVILFEETLYQKTAAGK.[L]		3.65565e-05	5.33751e-05	1	1	1	731345323	731345323 [57-87]		1	3401.82											No Quan Values	Not Found	Not Found	Not Found	Not Found	Not Found	Not Found	Not Found	Not Found	High	Not Found	High	7.23e-06	4.347e-06	3.42		Not Used	Not Used	R.ELLFTTPGALQYLSGVILFEETLYQKTAAGK.L	[57-87]
	FALSE	High	[R].FASINVENVEDNR.[R]		5.2858e-06	5.33751e-05	1	1	21	731345323	731345323 [40-52]		0	1506.72	91.9	272.4	29.1	58.7	62.7	64.3	94.2	114.3	121.3	91.1		High	High	High	High	High	Peak Found	High	High	High	High	High	7.23e-06	6.558e-07	2.59	25.82	Used	Used	R.FASINVENVEDNR.R	[40-52]
	FALSE	High	[R].FASINVENVEDNRR.[A]		1.44758e-06	5.33751e-05	1	1	158	731345323	731345323 [40-53]		1	1662.82	185.2	108.5	91.3	104.9	130.4	62.9	57	75.8	76.9	107.2		High	High	High	High	High	High	High	High	High	High	High	7.23e-06	1.855e-07	3.91	18.7	Used	Used	R.FASINVENVEDNRR.A	[40-53]
	FALSE	High	[R].GKYADELIANAAYIATPGK.[G]		5.87575e-10	5.33751e-05	1	1	180	731345323	731345323 [6-24]		1	1966.03	127.6	104.1	64.6	105.5	152.7	129.5	71.4	84.1	68	92.5		High	High	High	High	High	High	High	High	High	High	High	7.23e-06	9.208e-11	6.67	46.86	Used	Used	R.GKYADELIANAAYIATPGK.G	[6-24]
	FALSE	High	[R].GKYADELIANAAYIATPGK.[G]	1xGG [K2]	4.14574e-05	5.33751e-05	1	1	9	731345323	731345323 [6-24]		1	2080.07		42.2	54.6	58	34.8	264.5	93	44.5	119.1	289.3		Not Found	High	Peak Found	High	Peak Found	High	High	Peak Found	High	High	High	7.23e-06	4.923e-06	1.73	38.76	Used	Used	R.GKYADELIANAAYIATPGK.G	[6-24]
	FALSE	High	[R].GKYADELIANAAYIATPGKGILAADESTGTIGK.[R]		1.28085e-11	5.33751e-05	1	1	8	731345323	731345323 [6-38]		2	3279.71	636	211.9		55.1	36.4	7.6	8.6		44.3			High	High	Not Found	High	High	Peak Found	Peak Found	Not Found	Peak Found	Not Found	High	7.23e-06	2.205e-12	6.89	59.9	Used	Used	R.GKYADELIANAAYIATPGKGILAADESTGTIGK.R	[6-38]
	FALSE	High	[K].GILAADESTGTIGK.[R]		1.69528e-06	5.33751e-05	2	2	34	731345323; 731330405	731345323 [25-38]; 731330405 [25-38]		0	1332.7	111	87	51.7	45.2	53.6	147.2	112.5	98.7	119.3	173.8	Shared	High	High	High	High	High	High	High	High	High	High	High	7.23e-06	2.17e-07	1.87	14.4	Used	Used	K.GILAADESTGTIGK.R	[25-38]
	FALSE	High	[K].GILAADESTGTIGKR.[F]		1.04262e-07	5.33751e-05	2	2	168	731345323; 731330405	731345323 [25-39]; 731330405 [25-39]		1	1488.8	89.4	132.3	103.5	83.7	101.4	96.6	98.8	67	92.7	134.6	Shared	High	High	High	High	High	High	High	High	High	High	High	7.23e-06	1.432e-08	4.45	13.46	Used	Used	K.GILAADESTGTIGKR.F	[25-39]
	FALSE	High	[K].GILAADESTGTIGKR.[F]	1xGG [K14]	1.71452e-07	5.33751e-05	2	2	17	731345323; 731330405	731345323 [25-39]; 731330405 [25-39]		1	1602.84	7.6	102.8	441.7	6.3	13.1	138.9	108.2	27.6	57.2	96.4	Shared	High	High	High	Peak Found	Peak Found	High	High	High	High	High	High	7.23e-06	2.318e-08	3.77	11.81	Used	Used	K.GILAADESTGTIGKR.F	[25-39]
	FALSE	High	[K].GTIELAGTNGETTTQGLDNLGKR.[C]		2.06144e-09	5.33751e-05	1	1	30	731345323	731345323 [107-129]		1	2346.19	22.4	123.8	45.7	99.2	122.7	115.2	58.9	124.6	114.2	173.2		Peak Found	High	High	High	High	High	High	High	High	High	High	7.23e-06	3.126e-10	5.24	26.03	Used	Used	K.GTIELAGTNGETTTQGLDNLGKR.C	[107-129]
	FALSE	High	[K].KPWTLSFSYGR.[A]		2.29276e-06	5.33751e-05	1	1	412	731345323	731345323 [288-298]		0	1341.69	71.4	124.5	34.8	86.8	37.5	118.3	84.2	264	98.4	80.3		High	High	High	High	High	High	High	High	High	High	High	7.23e-06	2.91e-07	3.54	27.47	Used	Used	K.KPWTLSFSYGR.A	[288-298]
	FALSE	High	[K].KPWTLSFSYGR.[A]	1xPhospho [K/S/T/Y]	0.0012464	0.000154279	1	1	2	731345323	731345323 [288-298]	731345323 1xPhospho [T/K]	0	1421.66		43.9	96.3	26.5	381.9					451.5		Not Found	Peak Found	Peak Found	Peak Found	Peak Found	Not Found	Not Found	Not Found	Not Found	High	High	2.424e-05	0.0001306	1.64	27.2	Used	Used	K.KPWTLSFSYGR.A	[288-298]
	FALSE	High	[K].KVANDVIAEYTVR.[T]		2.36288e-07	5.33751e-05	1	1	257	731345323	731345323 [237-249]		1	1477.8	227	116.3	155.4	125.8	132.8	32.3	51.6	57	41.3	60.7		High	High	High	High	High	High	High	High	High	High	High	7.23e-06	3.181e-08	3.94	20.89	Used	Used	K.KVANDVIAEYTVR.T	[237-249]
	FALSE	High	[K].LFVDVMK.[E]		0.000644416	0.000126394	1	1	88	731345323	731345323 [88-94]		0	851.47	36.7	92.5	202.6	96.7	83	68.5	79.7	142.1	103.9	94.3		High	High	High	High	High	High	High	High	High	High	High	1.859e-05	6.982e-05	2.52	20.83	Used	Used	K.LFVDVMK.E	[88-94]
	FALSE	High	[K].LFVDVMK.[E]	1xOxidation [M6]	0.0142375	0.000935615	1	1	8	731345323	731345323 [88-94]		0	867.464	47.8	52.4	24.6	149.5	10.8	31.1	20.8	67.2	80.1	515.7		Peak Found	Peak Found	Peak Found	Peak Found	Peak Found	High	Peak Found	Peak Found	Peak Found	High	High	0.0001355	0.001461	1.14	19.93	Used	Used	K.LFVDVMK.E	[88-94]
	FALSE	High	[K].LFVDVMKEGGVLPGIK.[V]		2.98568e-08	5.33751e-05	1	1	67	731345323	731345323 [88-103]		1	1701.96	57.6	161.7	81.7	169	142	89.8	79.1	70.7	92.1	56.3		High	High	High	High	High	High	High	High	High	High	High	7.23e-06	4.236e-09	3.93	52.44	Used	Used	K.LFVDVMKEGGVLPGIK.V	[88-103]
	FALSE	High	[K].LFVDVMKEGGVLPGIK.[V]	1xOxidation [M6]	5.78379e-05	5.33751e-05	1	1	6	731345323	731345323 [88-103]		1	1717.96	27.5	43.4	29.1	15.5	134		14.1	21.5	6.5	708.4		Peak Found	Peak Found	High	High	High	Not Found	Peak Found	Peak Found	Peak Found	High	High	7.23e-06	6.846e-06	3.51	32.75	Used	Used	K.LFVDVMKEGGVLPGIK.V	[88-103]
	FALSE	High	[K].LFVDVMKEGGVLPGIKVDK.[G]		2.02685e-07	5.33751e-05	1	1	9	731345323	731345323 [88-106]		2	2044.15		115.8	252.4	177.2	6.9	203.5	104.7	19.5	92.9	27.1		Not Found	High	Peak Found	High	Peak Found	High	High	Peak Found	High	Peak Found	High	7.23e-06	2.73e-08	4.38	105.82	Used	Used	K.LFVDVMKEGGVLPGIKVDK.G	[88-106]
	FALSE	High	[K].IGPNEPSPLAILENANGLAR.[Y]		7.10949e-10	5.33751e-05	1	1	113	731345323	731345323 [149-168]		0	2046.1	157.5	193.9	24	97.6	74.6	97.9	46.1	102.9	116	89.4		High	High	High	High	High	High	High	High	High	High	High	7.23e-06	1.108e-10	4.41	68.8	Used	Used	K.IGPNEPSPLAILENANGLAR.Y	[149-168]
	FALSE	High	[K].LQAKKPWTLSFSYGR.[A]		4.49401e-06	5.33751e-05	1	1	68	731345323	731345323 [284-298]		1	1781.97	7.4	120.3	17.5	83.2	17.6	11.2	22.2	405.8	167.7	147.1		High	High	High	High	High	High	High	High	High	High	High	7.23e-06	5.603e-07	3.44	21.28	Used	Used	K.LQAKKPWTLSFSYGR.A	[284-298]
	FALSE	High	[K].LQAKKPWTLSFSYGR.[A]	2xGG [K4; K5]	0.0122305	0.000882483	1	1	4	731345323	731345323 [284-298]		1	2010.06	891.7		108.3									High	Not Found	Peak Found	Not Found	Not Found	Not Found	Not Found	Not Found	Not Found	High	High	0.000128	0.001251	1.92	73.36	Used	Used	K.LQAKKPWTLSFSYGR.A	[284-298]
	FALSE	High	[K].LQAKKPWTLSFSYGRALQQSTLK.[A]		0.00652128	0.000491899	1	1	1	731345323	731345323 [284-306]		2	2651.47								665.4	130.1	204.5		Not Found	Not Found	Not Found	Not Found	Not Found	Not Found	Not Found	High	Peak Found	Peak Found	High	6.94e-05	0.0006611	2.6	27.35	Used	Used	K.LQAKKPWTLSFSYGRALQQSTLK.A	[284-306]
	FALSE	High	[-].MTAYRGKYADELIANAAYIATPGK.[G]	1xMet-loss+Acetyl [N-Term]	1.14748e-06	5.33751e-05	1	1	8	731345323	731345323 [1-24]	731345323 1xMet-loss+Acetyl [N-Term]	2	2499.29	144.9	22.2		161	152.5		24.7	306.4	83.6	104.7		High	Peak Found	Not Found	Peak Found	High	Not Found	High	High	Peak Found	High	High	7.23e-06	1.482e-07	3.34	47.89	Used	Used	-.MTAYRGKYADELIANAAYIATPGK.G	[1-24]
	FALSE	High	[K].RCAEYYAAGAR.[F]	1xCarbamidomethyl [C2]	1.96949e-05	5.33751e-05	1	1	1	731345323	731345323 [129-139]		1	1287.59	124.6					16.7	8.7	507.9	342.1			Peak Found	Not Found	Not Found	Not Found	Not Found	Peak Found	Peak Found	High	Peak Found	Not Found	High	7.23e-06	2.379e-06	3.66	9.19	Used	Used	K.RCAEYYAAGAR.F	[129-139]
	FALSE	High	[K].RFASINVENVEDNRR.[A]		1.15489e-07	5.33751e-05	1	1	16	731345323	731345323 [39-53]		2	1818.92	284.7	125.6	36.1	117.5	186	15.5	75.5	65.3	51.4	42.3		High	High	High	High	High	High	High	High	Peak Found	Peak Found	High	7.23e-06	1.58e-08	3.52	14.08	Used	Used	K.RFASINVENVEDNRR.A	[39-53]
	FALSE	High	[K].SLNDHHVLLEGTLLKPNMVTPGSDSK.[K]		1.55435e-13	5.33751e-05	1	1	134	731345323	731345323 [211-236]		0	2802.45	192.7	112.6	162.8	178.6	82.7	60.4	75.4	40	58.3	36.5		High	High	High	High	High	High	High	High	High	High	High	7.23e-06	2.993e-14	7.45	33.27	Used	Used	K.SLNDHHVLLEGTLLKPNMVTPGSDSK.K	[211-236]
	FALSE	High	[K].SLNDHHVLLEGTLLKPNMVTPGSDSK.[K]	1xOxidation [M18]	9.67664e-11	5.33751e-05	1	1	33	731345323	731345323 [211-236]		0	2818.44	25.4	57	87.6	152.2	261.8	35.5	27.8	39.8	50	262.8		High	High	High	High	High	High	High	High	High	High	High	7.23e-06	1.584e-11	5.63	18.43	Used	Used	K.SLNDHHVLLEGTLLKPNMVTPGSDSK.K	[211-236]
	FALSE	High	[K].SLNDHHVLLEGTLLKPNMVTPGSDSK.[K]	1xGG [K15]	0.0968698	0.00494563	1	1	1	731345323	731345323 [211-236]		0	2916.49		297.4	403.8	298.8								Not Found	High	Peak Found	Peak Found	Not Found	Not Found	Not Found	Not Found	Not Found	Not Found	High	0.0007137	0.01055	0.87	23.7	Used	Used	K.SLNDHHVLLEGTLLKPNMVTPGSDSK.K	[211-236]
	FALSE	High	[K].SLNDHHVLLEGTLLKPNMVTPGSDSKK.[V]		1.3068e-12	5.33751e-05	1	1	117	731345323	731345323 [211-237]		1	2930.54	110.2	69.1	130.5	114.3	261.9	79.7	68.6	42.4	68	55.1		High	High	High	High	High	High	High	High	High	High	High	7.23e-06	2.38e-13	8.95	107.85	Used	Used	K.SLNDHHVLLEGTLLKPNMVTPGSDSKK.V	[211-237]
	FALSE	High	[K].SLNDHHVLLEGTLLKPNMVTPGSDSKK.[V]	1xOxidation [M18]	5.83129e-08	5.33751e-05	1	1	17	731345323	731345323 [211-237]		1	2946.54	11.2	51.9	56.7	116.5	426.6	51.7	32.4	39.4	24.2	189.3		High	High	Peak Found	High	High	High	Peak Found	High	High	High	High	7.23e-06	8.132e-09	3.31	106.42	Used	Used	K.SLNDHHVLLEGTLLKPNMVTPGSDSKK.V	[211-237]
	FALSE	High	[K].SLNDHHVLLEGTLLKPNMVTPGSDSKK.[V]	1xGG [K/S]	1.21548e-07	5.33751e-05	1	1	22	731345323	731345323 [211-237]		1	3044.58		186.1	254.6	51	3.4	160.8	5.4	45	60.9	232.8		Not Found	High	High	High	Peak Found	High	Peak Found	Peak Found	High	Peak Found	High	7.23e-06	1.658e-08	5.01	18.43	Used	Used	K.SLNDHHVLLEGTLLKPNMVTPGSDSKK.V	[211-237]
	FALSE	High	[K].SLNDHHVLLEGTLLKPNMVTPGSDSKKVANDVIAEYTVR.[T]		1.89875e-10	5.33751e-05	1	1	24	731345323	731345323 [211-249]		2	4261.23	563	28.7		214.7	2.6	1.5	59.9	40.2	65.2	24.2		High	High	Not Found	High	Peak Found	Peak Found	High	High	High	High	High	7.23e-06	3.059e-11	9.91	47.42	Used	Used	K.SLNDHHVLLEGTLLKPNMVTPGSDSKKVANDVIAEYTVR.T	[211-249]
	FALSE	High	[K].SLNDHHVLLEGTLLKPNMVTPGSDSKKVANDVIAEYTVR.[T]	1xOxidation [M18]	9.47539e-05	5.33751e-05	1	1	1	731345323	731345323 [211-249]		2	4277.22	296.9			561.2	141.8							Peak Found	Not Found	Not Found	High	Peak Found	Not Found	Not Found	Not Found	Not Found	Not Found	High	7.23e-06	1.116e-05	3.51	47	Used	Used	K.SLNDHHVLLEGTLLKPNMVTPGSDSKKVANDVIAEYTVR.T	[211-249]
	FALSE	High	[K].TAAGKLFVDVMK.[E]		1.92181e-06	5.33751e-05	1	1	12	731345323	731345323 [83-94]		1	1279.71	331.1	207.5	46.1	198	22.2	22.3	27.2	39.8	71.3	34.5		High	High	Peak Found	High	Peak Found	Peak Found	Peak Found	Peak Found	High	High	High	7.23e-06	2.45e-07	3.47	30.85	Used	Used	K.TAAGKLFVDVMK.E	[83-94]
	FALSE	High	[K].TAAGKLFVDVMKEGGVLPGIK.[V]		2.50222e-08	5.33751e-05	1	1	16	731345323	731345323 [83-103]		2	2130.2	232	128.7	226	103.2	17.3	74.3	37	52.2	108.9	20.5		High	High	Peak Found	High	Peak Found	High	Peak Found	High	High	High	High	7.23e-06	3.557e-09	5.86	106.11	Used	Used	K.TAAGKLFVDVMKEGGVLPGIK.V	[83-103]
	FALSE	High	[R].TVPPAVPGIMFLSGGQSEEEATLNLNAMNK.[L]		1.60336e-06	5.33751e-05	1	1	114	731345323	731345323 [254-283]		0	3115.54	211.5	205.6	26.6	56.5	40.3	39.3	51.8	204.5	94.2	69.6		High	High	High	High	High	High	High	High	High	High	High	7.23e-06	2.054e-07	5.1	77.36	Used	Used	R.TVPPAVPGIMFLSGGQSEEEATLNLNAMNK.L	[254-283]
	FALSE	High	[R].TVPPAVPGIMFLSGGQSEEEATLNLNAMNK.[L]	1xOxidation [M10]	1.46797e-05	5.33751e-05	1	1	5	731345323	731345323 [254-283]		0	3131.54		100.4				28.8	227.2	53		590.5		Not Found	High	Not Found	High	Not Found	Peak Found	Peak Found	Peak Found	Not Found	High	High	7.23e-06	1.782e-06	3.93	76.32	Used	Used	R.TVPPAVPGIMFLSGGQSEEEATLNLNAMNK.L	[254-283]
	FALSE	High	[R].TVPPAVPGIMFLSGGQSEEEATLNLNAMNK.[L]	2xOxidation [M10; M28]	0.00431953	0.000400026	1	1	1	731345323	731345323 [254-283]		0	3147.53										1000		Not Found	Not Found	Not Found	Not Found	Not Found	Not Found	Not Found	Not Found	Not Found	High	High	5.451e-05	0.0004332	1.41	57.51	Used	Used	R.TVPPAVPGIMFLSGGQSEEEATLNLNAMNK.L	[254-283]
	FALSE	High	[R].TVPPAVPGIMFLSGGQSEEEATLNLNAMNKLQAK.[K]		1.23984e-11	5.33751e-05	1	1	45	731345323	731345323 [254-287]		1	3555.82	493.4	143.9	10.6	79.3	29		48.3	91	67.7	36.8		High	High	High	High	High	Not Found	High	High	High	High	High	7.23e-06	2.134e-12	5.28	72.73	Used	Used	R.TVPPAVPGIMFLSGGQSEEEATLNLNAMNKLQAK.K	[254-287]
	FALSE	High	[R].TVPPAVPGIMFLSGGQSEEEATLNLNAMNKLQAK.[K]	1xOxidation [M10]	7.20946e-06	5.33751e-05	1	1	2	731345323	731345323 [254-287]		1	3571.81				1000								Not Found	Not Found	Not Found	High	Not Found	Not Found	Not Found	Not Found	Not Found	Not Found	High	7.23e-06	8.888e-07	2.74	62.32	Used	Used	R.TVPPAVPGIMFLSGGQSEEEATLNLNAMNKLQAK.K	[254-287]
	FALSE	High	[R].TVPPAVPGIMFLSGGQSEEEATLNLNAMNKLQAKKPWTLSFSYGR.[A]		7.0445e-06	5.33751e-05	1	1	8	731345323	731345323 [254-298]		2	4878.5	74.3			206.7		30.9		468.9	165.2	54		High	Not Found	Not Found	High	Not Found	Peak Found	Not Found	High	High	Peak Found	High	7.23e-06	8.684e-07	5.71	70.32	Used	Used	R.TVPPAVPGIMFLSGGQSEEEATLNLNAMNKLQAKKPWTLSFSYGR.A	[254-298]
	FALSE	High	[K].VANDVIAEYTVR.[T]		2.08939e-06	5.33751e-05	1	1	149	731345323	731345323 [238-249]		0	1349.71	167.8	129.1	33.2	64.4	74.1	78.2	95.8	120.2	100.9	136.3		High	High	High	High	High	High	High	High	High	High	High	7.23e-06	2.657e-07	2.52	28.1	Used	Used	K.VANDVIAEYTVR.T	[238-249]
	FALSE	High	[K].VANDVIAEYTVRTLQR.[T]		0.000250313	9.51359e-05	1	1	2	731345323	731345323 [238-253]		1	1848					70.4		46.4	727.9	46.9	108.4		Not Found	Not Found	Not Found	Not Found	Peak Found	Not Found	Peak Found	High	Peak Found	Peak Found	High	1.696e-05	2.852e-05	2.76	31.85	Used	Used	K.VANDVIAEYTVRTLQR.T	[238-253]
	FALSE	High	[K].VDKGTIELAGTNGETTTQGLDNLGK.[R]		1.60336e-06	5.33751e-05	1	1	17	731345323	731345323 [104-128]		1	2532.28	39	47	85.4	67.2	72	164.3	111.8	148.9	121	143.4		High	High	High	High	High	High	High	High	High	High	High	7.23e-06	2.054e-07	4.09	20.06	Used	Used	K.VDKGTIELAGTNGETTTQGLDNLGK.R	[104-128]
	FALSE	High	[K].VDKGTIELAGTNGETTTQGLDNLGKR.[C]		2.35434e-14	5.33751e-05	1	1	59	731345323	731345323 [104-129]		2	2688.38	36.1	130.4	29.7	187.1	84.3	122.4	94.1	85.4	103.9	126.7		High	High	High	High	High	High	High	High	High	High	High	7.23e-06	4.757e-15	7.71	23.6	Used	Used	K.VDKGTIELAGTNGETTTQGLDNLGKR.C	[104-129]
	FALSE	High	[K].VDKGTIELAGTNGETTTQGLDNLGKR.[C]	1xGG [K25]	7.4108e-05	5.33751e-05	1	1	2	731345323	731345323 [104-129]		2	2802.42		84.3	694	43.8	43.5	64.3			70.1			Not Found	High	High	Peak Found	Peak Found	Peak Found	Not Found	Not Found	Peak Found	Not Found	High	7.23e-06	8.722e-06	2.48	17.77	Used	Used	K.VDKGTIELAGTNGETTTQGLDNLGKR.C	[104-129]
	FALSE	High	[R].VLAACYK.[S]	1xCarbamidomethyl [C5]	0.00156249	0.000154279	1	1	29	731345323	731345323 [204-210]		0	824.433	24.2	12.1	21.1	4.2	34.1	301.9	358.2	108.6	92.2	43.3		High	High	High	Peak Found	High	High	High	High	High	High	High	2.424e-05	0.0001613	1.59	9.5	Used	Used	R.VLAACYK.S	[204-210]
	FALSE	High	[K].WRAVLKIGPNEPSPLAILENANGLAR.[Y]		0.192992	0.00918805	1	1	1	731345323	731345323 [143-168]		2	2799.56				236.4				489.1		274.5		Not Found	Not Found	Not Found	Peak Found	Not Found	Not Found	Not Found	Peak Found	Not Found	High	High	0.00135	0.02397	2.72	103.28	Used	Used	K.WRAVLKIGPNEPSPLAILENANGLAR.Y	[143-168]
	FALSE	High	[K].YADELIANAAYIATPGK.[G]		1.21548e-07	5.33751e-05	1	1	76	731345323	731345323 [8-24]		0	1780.91	187.1	165.3	9.9	66	51	68.2	81.5	154.1	91.4	125.3		High	High	High	High	High	High	High	High	High	High	High	7.23e-06	1.662e-08	5.21	47.8	Used	Used	K.YADELIANAAYIATPGK.G	[8-24]
	FALSE	High	[K].YADELIANAAYIATPGKGILAADESTGTIGK.[R]		2.4221e-08	5.33751e-05	1	1	3	731345323	731345323 [8-38]		1	3094.59	599.1	206.4		194.5								High	High	Not Found	High	Not Found	Not Found	Not Found	Not Found	Not Found	Not Found	High	7.23e-06	3.452e-09	3.63	61.52	Used	Used	K.YADELIANAAYIATPGKGILAADESTGTIGK.R	[8-38]
	FALSE	High	[K].YADELIANAAYIATPGKGILAADESTGTIGKR.[F]		2.28286e-12	5.33751e-05	1	1	48	731345323	731345323 [8-39]		2	3250.7	232.6	191.5	37.5	84.4	181.9	3.2	49.9	105.3	69.4	44.2		High	High	Peak Found	High	High	High	High	High	High	High	High	7.23e-06	4.107e-13	7.35	53.18	Used	Used	K.YADELIANAAYIATPGKGILAADESTGTIGKR.F	[8-39]
	FALSE	High	[R].YAIICQENGLVPIVEPEILVDGSHDIDR.[C]	1xCarbamidomethyl [C5]	1.07187e-10	5.33751e-05	1	1	40	731345323	731345323 [169-196]		0	3164.59	11.6	162.7	193.1	146.2	19.6	83.3	94.4	123.2	98.5	67.3		High	High	High	High	High	High	High	High	High	High	High	7.23e-06	1.752e-11	6.22	71.72	Used	Used	R.YAIICQENGLVPIVEPEILVDGSHDIDR.C	[169-196]
	FALSE	High	[R].YAIICQENGLVPIVEPEILVDGSHDIDRCAEVSER.[V]	2xCarbamidomethyl [C5; C29]	1.1317e-09	5.33751e-05	1	1	49	731345323	731345323 [169-203]		1	3995.95	5.4	155.1	95.6	242.9	37.4	53.7	99	132.8	94.3	83.8		High	High	High	High	High	High	High	High	High	High	High	7.23e-06	1.742e-10	5.71	65.29	Used	Used	R.YAIICQENGLVPIVEPEILVDGSHDIDRCAEVSER.V	[169-203]
	FALSE	High	[R].YAIICQENGLVPIVEPEILVDGSHDIDRCAEVSERVLAACYK.[S]	3xCarbamidomethyl [C5; C29; C40]	9.93537e-07	5.33751e-05	1	1	11	731345323	731345323 [169-210]		2	4801.36		5.5		349.2	88		41.4	355.6	91.5	68.9		Not Found	Peak Found	Not Found	High	High	Not Found	Peak Found	High	High	High	High	7.23e-06	1.286e-07	4.23	78.23	Used	Used	R.YAIICQENGLVPIVEPEILVDGSHDIDRCAEVSERVLAACYK.S	[169-210]
	FALSE	High	[K].YQGGAAGADASESLHVK.[D]		3.27658e-08	5.33751e-05	1	1	60	731345323	731345323 [337-353]		0	1660.79	45	82.3	88.8	62.4	28.2	156.3	120	139.5	107.4	169.9		High	High	High	High	High	High	High	High	High	High	High	7.23e-06	4.629e-09	2.53	11.05	Used	Used	K.YQGGAAGADASESLHVK.D	[337-353]
	FALSE	High	[K].YQGGAAGADASESLHVKDYK.[Y]		4.23742e-09	5.33751e-05	1	1	4	731345323	731345323 [337-356]		1	2066.98	51.9	146.4	478.1	101.9	17.3			64.4	30.5	109.6		Peak Found	High	High	Peak Found	Peak Found	Not Found	Not Found	Peak Found	High	Peak Found	High	7.23e-06	6.291e-10	5.96	10.42	Used	Used	K.YQGGAAGADASESLHVKDYK.Y	[337-356]
	FALSE	High	[K].YQGGAAGADASESLHVKDYKY.[-]		3.37919e-10	5.33751e-05	1	1	189	731345323	731345323 [337-357]		2	2230.04	173.5	59	179.7	135.8	163.8	58.1	65.2	62.2	38.6	64.1		High	High	High	High	High	High	High	High	High	High	High	7.23e-06	5.359e-11	6.41	10.37	Used	Used	K.YQGGAAGADASESLHVKDYKY.-	[337-357]
	FALSE	High	[K].YQGGAAGADASESLHVKDYKY.[-]	1xGG [K]	2.41292e-06	5.33751e-05	1	1	16	731345323	731345323 [337-357]		2	2344.08	0.7	122.2	246.1	10.2	10.5	215.8	155.9	30.4	63.3	145		Peak Found	High	High	Peak Found	Peak Found	High	High	Peak Found	High	High	High	7.23e-06	3.056e-07	4.2	13.28	Used	Used	K.YQGGAAGADASESLHVKDYKY.-	[337-357]
FALSE		High	Master Protein	8771575436459987600	4618	731329677	PREDICTED: putative aconitate hydratase, cytoplasmic [Beta vulgaris subsp. vulgaris]	MIAGAAKSSLSSSSSSTSLSPLLRAARHRFVTTLSSPSISSSSSASSYSPSSRIFSAFRSHPVAGHRSLGFSSVIRSISSASSRWSHGVDWRSPVSLRSQIAASPPLVERFQRKIATMASEHPYKEIFTSLPKPGGGEFGKFYSLPALNDPRVEKLPYSIRILLESAIRNCDGFQVTKDDVEKIIDWENSAPKLVEIPFKPARVLLQDFTGVPAVVDLAAMRDAMKNLNSDPNKINPLVPVDLVIDHSVQVDVARSENAVQANMEFEFKRNGERFGFLKWGSTAFQNMLVVPPGSGIVHQVNLEYLGRVVFNNGGLLYPDSVVGTDSHTTMIDGLGVAGWGVGGIEAEATMLGQPMSMVLPGVVGFKMTGKLRDGVTATDLVLTATQMLRKHGVVGKFV…	>gi|731329677|ref|XP_010675721.1| PREDICTED: putative aconitate hydratase, cytoplasmic [Beta vulgaris subsp. vulgaris]	0	934.802	69	77	2474	77	77	1015	110.4	7.17	5201.34	69	2474	77	0	111.3	122	108.8	100	91.5	104.7	95.4	79.3	97.6	89.3	1.59058e+09	3.54327e+09	1.95234e+09	1.47654e+09	5.18041e+08	2.50261e+09	1.169e+09	1.36842e+09	2.06622e+09	1.81969e+09	3.23248e+09	3.54327e+09	3.15744e+09	2.90335e+09	2.65769e+09
	Checked	Confidence	Annotated Sequence	Modifications	Qvality PEP	Qvality q-value	# Protein Groups	# Proteins	# PSMs	Master Protein Accessions	Positions in Master Proteins	Modifications in Master Proteins	# Missed Cleavages	Theo. MH+ [Da]	Abundances (Scaled): F1: Control	Abundances (Scaled): F2: Control	Abundances (Scaled): F3: Control	Abundances (Scaled): F4: Control	Abundances (Scaled): F5: Control	Abundances (Scaled): F6: Sample	Abundances (Scaled): F7: Sample	Abundances (Scaled): F8: Sample	Abundances (Scaled): F9: Sample	Abundances (Scaled): F10: Sample	Quan Info	Found in Sample: [S1] F1: Control	Found in Sample: [S2] F2: Control	Found in Sample: [S3] F3: Control	Found in Sample: [S4] F4: Control	Found in Sample: [S5] F5: Control	Found in Sample: [S6] F6: Sample	Found in Sample: [S7] F7: Sample	Found in Sample: [S8] F8: Sample	Found in Sample: [S9] F9: Sample	Found in Sample: [S10] F10: Sample	Confidence (by Search Engine): Sequest HT	Percolator q-Value (by Search Engine): Sequest HT	Percolator PEP (by Search Engine): Sequest HT	XCorr (by Search Engine): Sequest HT	Top Apex RT [min]	Quan Usage	Quan Ratio Usage	Sequence in Protein	Positions in Proteins
	FALSE	High	[K].AGEDADTLGLTGHER.[Y]		1.10922e-08	5.33751e-05	1	1	41	731329677	731329677 [942-956]		0	1541.72	21.9	98.9	80.3	77.4	108.4	124.2	96.5	74.6	126.6	191.3		High	High	High	High	High	High	High	High	High	High	High	7.23e-06	1.612e-09	4.69	10.59	Used	Used	K.AGEDADTLGLTGHER.Y	[942-956]
	FALSE	High	[R].ANKMFVDYNEPQQER.[V]		0.000663072	0.000126394	1	1	2	731329677	731329677 [460-474]		1	1868.86	514.2	226.8		25.7	12.9		37.3	108.2	59.3	15.6		High	Peak Found	Not Found	Peak Found	Peak Found	Not Found	Peak Found	Peak Found	Peak Found	Peak Found	High	1.859e-05	7.151e-05	2.41	14.86	Used	Used	R.ANKMFVDYNEPQQER.V	[460-474]
	FALSE	High	[R].ANYLASPPLVVAYALAGTVDIDFEKEPIGTGK.[D]		0.0214859	0.00128042	1	1	1	731329677	731329677 [669-700]		1	3319.75								263.4	736.6			Not Found	Not Found	Not Found	Not Found	Not Found	Not Found	Not Found	Peak Found	High	Not Found	High	0.0001942	0.002221	1.87	90.86	Used	Used	R.ANYLASPPLVVAYALAGTVDIDFEKEPIGTGK.D	[669-700]
	FALSE	High	[R].ANYLASPPLVVAYALAGTVDIDFEKEPIGTGKDGK.[S]		2.14269e-10	5.33751e-05	1	1	26	731329677	731329677 [669-703]		2	3619.89	253.4	83.9	140.5	78.4	4.3	49.1	132.9	100.1	103.3	54.2		High	High	High	High	Peak Found	High	High	High	High	High	High	7.23e-06	3.44e-11	5.52	110.82	Used	Used	R.ANYLASPPLVVAYALAGTVDIDFEKEPIGTGKDGK.S	[669-703]
	FALSE	High	[K].ASELGLEVKPWVK.[T]		7.37826e-06	5.33751e-05	1	1	52	731329677	731329677 [577-589]		0	1455.82	122.1	110.7	267.4	107.2	113.1	56.7	61.2	52	58.5	51		High	High	High	High	High	High	High	High	High	High	High	7.23e-06	9.093e-07	3.49	20.81	Used	Used	K.ASELGLEVKPWVK.T	[577-589]
	FALSE	High	[R].ATIANMSPEYGATMGFFPVDHVTLEYLK.[L]		6.96827e-09	5.33751e-05	1	1	28	731329677	731329677 [415-442]		0	3102.5	111.4	117.2	160.8	98.1	45.4	98.9	114.8	100.9	110.5	42		High	High	High	High	Peak Found	High	High	High	High	High	High	7.23e-06	1.023e-09	6.53	76.88	Used	Used	R.ATIANMSPEYGATMGFFPVDHVTLEYLK.L	[415-442]
	FALSE	High	[R].ATIANMSPEYGATMGFFPVDHVTLEYLK.[L]	1xOxidation [M14]	8.60338e-05	5.33751e-05	1	1	1	731329677	731329677 [415-442]		0	3118.49				89.3	49.5	54.4			95.9	710.8		Not Found	Not Found	Not Found	Peak Found	Peak Found	Peak Found	Not Found	Not Found	Peak Found	High	High	7.23e-06	1.013e-05	2.3	68.18	Used	Used	R.ATIANMSPEYGATMGFFPVDHVTLEYLK.L	[415-442]
	FALSE	High	[R].ATIANMSPEYGATMGFFPVDHVTLEYLK.[L]	1xGG [T13]	4.39404e-05	5.33751e-05	1	1	1	731329677	731329677 [415-442]		0	3216.54				42.3	45.3	604.8		113.7	193.9			Not Found	Not Found	Not Found	Peak Found	Peak Found	High	Not Found	Peak Found	Peak Found	Not Found	High	7.23e-06	5.218e-06	3.23	41.97	Used	Used	R.ATIANMSPEYGATMGFFPVDHVTLEYLK.L	[415-442]
	FALSE	High	[R].DAMKNLNSDPNKINPLVPVDLVIDHSVQVDVAR.[S]		9.66217e-07	5.33751e-05	1	1	2	731329677	731329677 [223-255]		2	3625.9	986.6			13.4								High	Not Found	Not Found	Peak Found	Not Found	Not Found	Not Found	Not Found	Not Found	Not Found	High	7.23e-06	1.251e-07	4.96	64.74	Used	Used	R.DAMKNLNSDPNKINPLVPVDLVIDHSVQVDVAR.S	[223-255]
	FALSE	High	[K].DAYCLLNFGDSITTDHISPAGSIHK.[D]	1xCarbamidomethyl [C4]	3.73208e-08	5.33751e-05	1	1	21	731329677	731329677 [785-809]		0	2732.3	8.4	45.4	96	167.6	111.5	82.2	116.1	173	115.3	84.4		Peak Found	High	High	High	High	High	High	High	High	High	High	7.23e-06	5.246e-09	5.25	52.65	Used	Used	K.DAYCLLNFGDSITTDHISPAGSIHK.D	[785-809]
	FALSE	High	[K].DAYCLLNFGDSITTDHISPAGSIHKDSPAAK.[F]	1xCarbamidomethyl [C4]	7.5045e-12	5.33751e-05	1	1	62	731329677	731329677 [785-815]		1	3301.58	2.5	106.3	57.5	87.9	282.4	126.2	88.4	110.7	68.6	69.4		Peak Found	High	High	High	High	High	High	High	High	High	High	7.23e-06	1.311e-12	6.14	44.5	Used	Used	K.DAYCLLNFGDSITTDHISPAGSIHKDSPAAK.F	[785-815]
	FALSE	High	[K].DDVEKIIDWENSAPK.[L]		0.000154287	9.51359e-05	1	1	2	731329677	731329677 [179-193]		1	1758.85		362.8	273			95		125.4	143.8			Not Found	High	High	Not Found	Not Found	Peak Found	Not Found	Peak Found	Peak Found	Not Found	High	1.696e-05	1.8e-05	0.97	41.51	Used	Used	K.DDVEKIIDWENSAPK.L	[179-193]
	FALSE	High	[K].DFNSYGSR.[R]		0.0142375	0.000935615	1	1	10	731329677	731329677 [826-833]		0	945.406	25.6	4.7	23.5	6.8	5.3	248.9	306.7	73.9	159.8	144.7		Peak Found	Peak Found	Peak Found	Peak Found	Peak Found	High	High	Peak Found	High	High	High	0.0001355	0.001463	1.67	10.7	Used	Used	K.DFNSYGSR.R	[826-833]
	FALSE	High	[R].DGVTATDLVLTATQMLR.[K]		2.32628e-09	5.33751e-05	1	1	26	731329677	731329677 [374-390]		0	1804.95	72.2	187.2	164.2	122.1	37.9	67.7	93.5	103.5	80.9	70.8		Peak Found	High	High	High	Peak Found	High	High	High	High	High	High	7.23e-06	3.519e-10	4.3	94.41	Used	Used	R.DGVTATDLVLTATQMLR.K	[374-390]
	FALSE	High	[R].DGVTATDLVLTATQMLRK.[H]		1.01044e-05	5.33751e-05	1	1	5	731329677	731329677 [374-391]		1	1933.04		445	19.3	261.7				106.8	96.3	70.9		Not Found	High	Peak Found	High	Not Found	Not Found	Not Found	Peak Found	High	Peak Found	High	7.23e-06	1.237e-06	3.66	78.08	Used	Used	R.DGVTATDLVLTATQMLRK.H	[374-391]
	FALSE	High	[R].DIWPSNEEIAQVVQSSVLPDMFR.[S]		5.21568e-08	5.33751e-05	1	1	52	731329677	731329677 [709-731]		0	2660.3	91	185.2	60.3	90.5	166.4	138.2	75.1	58.9	101.4	32.9		High	High	High	High	High	High	High	High	High	High	High	7.23e-06	7.283e-09	3.98	101.97	Used	Used	R.DIWPSNEEIAQVVQSSVLPDMFR.S	[709-731]
	FALSE	High	[R].DIWPSNEEIAQVVQSSVLPDMFR.[S]	1xOxidation [M21]	0.0296422	0.00174065	1	1	1	731329677	731329677 [709-731]		0	2676.3						105.6		440.1		454.3		Not Found	Not Found	Not Found	Not Found	Not Found	Peak Found	Not Found	Peak Found	Not Found	High	High	0.0002594	0.003036	0.88	92	Used	Used	R.DIWPSNEEIAQVVQSSVLPDMFR.S	[709-731]
	FALSE	High	[K].DMSLNPPGPFGVK.[D]		0.000229208	9.51359e-05	1	1	23	731329677	731329677 [772-784]		0	1358.68	24.3	66.3		54.1	48.3	157	161	146.9	83.7	258.5		High	Peak Found	Not Found	High	Peak Found	High	High	High	High	High	High	1.696e-05	2.614e-05	1.68	40.86	Used	Used	K.DMSLNPPGPFGVK.D	[772-784]
	FALSE	High	[K].DMSLNPPGPFGVK.[D]	1xOxidation [M2]	0.029902	0.00174065	1	1	1	731329677	731329677 [772-784]		0	1374.67										1000		Not Found	Not Found	Not Found	Not Found	Not Found	Not Found	Not Found	Not Found	Not Found	High	High	0.0002594	0.003066	1.27	23.99	Used	Used	K.DMSLNPPGPFGVK.D	[772-784]
	FALSE	High	[K].DMSLNPPGPFGVKDAYCLLNFGDSITTDHISPAGSIHKDSPAAK.[F]	1xCarbamidomethyl [C17]	4.64229e-06	5.33751e-05	1	1	3	731329677	731329677 [772-815]		2	4641.24		235.7		251.4					210.1	302.8		Not Found	High	Not Found	High	Not Found	Not Found	Not Found	Not Found	Peak Found	High	High	7.23e-06	5.79e-07	5.41	68.1	Used	Used	K.DMSLNPPGPFGVKDAYCLLNFGDSITTDHISPAGSIHKDSPAAK.F	[772-815]
	FALSE	High	[K].EAGHQTIVLAGAEYGSGSSR.[D]		3.12775e-08	5.33751e-05	1	1	24	731329677	731329677 [883-902]		0	1989.96	45.4	101.8	72.8	48.7	78.3	109.2	102.8	189.3	114.4	137.3		Peak Found	High	Peak Found	High	High	High	High	High	High	High	High	7.23e-06	4.423e-09	5.31	13.17	Used	Used	K.EAGHQTIVLAGAEYGSGSSR.D	[883-902]
	FALSE	High	[K].EAGHQTIVLAGAEYGSGSSRDWAAK.[G]		0.00026006	9.51359e-05	1	1	4	731329677	731329677 [883-907]		1	2561.24		52.3		371.9	100.2	45.5		89	165	176		High	Peak Found	Not Found	High	High	Peak Found	Not Found	High	Peak Found	Peak Found	High	1.696e-05	2.95e-05	1.45	18.05	Used	Used	K.EAGHQTIVLAGAEYGSGSSRDWAAK.G	[883-907]
	FALSE	High	[K].EIFTSLPKPGGGEFGK.[F]		4.25072e-06	5.33751e-05	1	1	2	731329677	731329677 [126-141]		0	1663.87		3.3	826.8		17.3	99.3	2.3	3.2	2.1	45.7		Not Found	Peak Found	High	Not Found	Peak Found	High	Peak Found	Peak Found	Peak Found	Peak Found	High	7.23e-06	5.308e-07	3.67	23.11	Used	Used	K.EIFTSLPKPGGGEFGK.F	[126-141]
	FALSE	High	[R].FDTEVELAYFDHGGILPYVIR.[Q]		1.90479e-09	5.33751e-05	1	1	57	731329677	731329677 [990-1010]		0	2454.23	16.8	55.1	342.8	96.5	17.8	135.8	132.3	57.8	92.6	52.5		High	High	High	High	High	High	High	High	High	High	High	7.23e-06	2.894e-10	5.44	109.4	Used	Used	R.FDTEVELAYFDHGGILPYVIR.Q	[990-1010]
	FALSE	High	[R].FGFLKWGSTAFQNMLVVPPGSGIVHQVNLEYLGR.[V]		1.26341e-08	5.33751e-05	1	1	2	731329677	731329677 [275-308]		1	3761.96	36.3	455.3				327.7	41.3	82.3	57.2			Peak Found	High	Not Found	Not Found	Not Found	Peak Found	Peak Found	High	Peak Found	Not Found	High	7.23e-06	1.827e-09	6.39	110.41	Used	Used	R.FGFLKWGSTAFQNMLVVPPGSGIVHQVNLEYLGR.V	[275-308]
	FALSE	High	[K].FLMEHGVDR.[K]		0.000151823	9.51359e-05	1	1	31	731329677	731329677 [816-824]		0	1103.53	152.3	68.2	86.5	219	116.7	65.2	85.6	70	71.8	64.6		High	High	High	High	High	High	High	High	High	High	High	1.696e-05	1.774e-05	2.33	11.99	Used	Used	K.FLMEHGVDR.K	[816-824]
	FALSE	High	[K].FLMEHGVDRK.[D]		0.000102516	5.33751e-05	1	1	35	731329677	731329677 [816-825]		1	1231.63	128.8	103.1	103.8	179.2	128.2	37.8	71	67.8	122.1	58.1		High	High	High	High	High	High	High	High	High	High	High	7.23e-06	1.208e-05	2.42	9.64	Used	Used	K.FLMEHGVDRK.D	[816-825]
	FALSE	High	[K].FLMEHGVDRKDFNSYGSR.[R]		7.27708e-07	5.33751e-05	1	1	27	731329677	731329677 [816-833]		2	2158.01	364.8	101.3	1.4	198.1	215.4	6	23.9	20.6	32.1	36.4		High	High	Peak Found	High	High	High	High	High	Peak Found	High	High	7.23e-06	9.511e-08	3.71	19.35	Used	Used	K.FLMEHGVDRKDFNSYGSR.R	[816-833]
	FALSE	High	[K].FSFHGQPAELK.[H]		0.000373752	0.000126394	1	1	42	731329677	731329677 [536-546]		0	1260.64	38.9	80.7	255.5	79	126.7	94.2	91	75.2	53.5	105.3		High	High	High	High	High	High	High	High	High	High	High	1.859e-05	4.162e-05	2.96	10.64	Used	Used	K.FSFHGQPAELK.H	[536-546]
	FALSE	High	[K].FVEFHGQGVGQLSLADR.[A]		2.36994e-09	5.33751e-05	1	1	81	731329677	731329677 [398-414]		0	1859.94	107.5	147	141.3	98.1	111.2	104.7	59.1	94.4	64.6	72.1		High	High	High	High	High	High	High	High	High	High	High	7.23e-06	3.584e-10	3.52	32.85	Used	Used	K.FVEFHGQGVGQLSLADR.A	[398-414]
	FALSE	High	[K].FYSLPALNDPR.[V]		0.000174856	9.51359e-05	1	1	43	731329677	731329677 [142-152]		0	1292.66	37.6	118.2	141.8	91.9	102.1	100	87.8	88	110.1	122.4		High	High	High	High	High	High	High	High	High	High	High	1.696e-05	2.025e-05	2.13	33.39	Used	Used	K.FYSLPALNDPR.V	[142-152]
	FALSE	High	[K].FYSLPALNDPRVEK.[L]		0.000373752	0.000126394	1	1	6	731329677	731329677 [142-155]		1	1648.87	39	136.9	3.5	145.1	170.1	160.5	89.3	98.9	46.7	110.1		Peak Found	High	Peak Found	High	High	High	Peak Found	High	Peak Found	High	High	1.859e-05	4.167e-05	2.65	93.71	Used	Used	K.FYSLPALNDPRVEK.L	[142-155]
	FALSE	High	[K].FYSLPALNDPRVEKLPYSIR.[I]		7.25302e-05	5.33751e-05	1	1	31	731329677	731329677 [142-161]		2	2378.29	202.8	164.3	94.1	78.5	69.7	64.8	84	94.9	61.9	85		High	High	Peak Found	High	High	High	High	High	High	High	High	7.23e-06	8.547e-06	2.92	51.87	Used	Used	K.FYSLPALNDPRVEKLPYSIR.I	[142-161]
	FALSE	High	[K].GFAIPKEEQEK.[V]		0.000227308	9.51359e-05	1	1	37	731329677	731329677 [522-532]		1	1275.66	26.9	53.7	133.3	77.6	40	164.3	115.3	72.1	140.3	176.6		High	Peak Found	High	High	High	High	High	High	High	High	High	1.696e-05	2.594e-05	1.6	10.26	Used	Used	K.GFAIPKEEQEK.V	[522-532]
	FALSE	High	[K].GFAIPKEEQEKVAK.[F]		6.65173e-05	5.33751e-05	1	1	22	731329677	731329677 [522-535]		2	1573.86	68.4	92.5	207.8	199.7	26.4	58.1	54	85.5	92.5	115.1		High	High	High	High	Peak Found	Peak Found	High	Peak Found	High	High	High	7.23e-06	7.835e-06	3.3	9.96	Used	Used	K.GFAIPKEEQEKVAK.F	[522-535]
	FALSE	High	[K].GNPMWNSLEVPTGTLYQWDSK.[S]		6.36977e-08	5.33751e-05	1	1	70	731329677	731329677 [740-760]		0	2423.13	113	199.1	74.9	102	85.6	51.6	90	119.6	100.7	63.7		High	High	High	High	High	High	High	High	High	High	High	7.23e-06	8.848e-09	4.27	71.1	Used	Used	K.GNPMWNSLEVPTGTLYQWDSK.S	[740-760]
	FALSE	High	[K].GNPMWNSLEVPTGTLYQWDSK.[S]	1xOxidation [M4]	1.7887e-05	5.33751e-05	1	1	6	731329677	731329677 [740-760]		0	2439.13		65.2		327.9	279.2	90.7		30.7	53.8	152.5		Not Found	Peak Found	Not Found	High	High	High	Not Found	Peak Found	Peak Found	High	High	7.23e-06	2.161e-06	2.67	71.16	Used	Used	K.GNPMWNSLEVPTGTLYQWDSK.S	[740-760]
	FALSE	High	[K].GPMLQGVK.[A]		0.00827128	0.000556166	1	1	13	731329677	731329677 [908-915]		0	829.46	26.5	39.5	35.4	28.9	32.4	233.7	238.2	87.5	176	101.8		Peak Found	Peak Found	High	Peak Found	High	High	High	Peak Found	High	Peak Found	High	8.164e-05	0.0008427	1.83	10.99	Used	Used	K.GPMLQGVK.A	[908-915]
	FALSE	High	[R].GTFANIR.[I]		0.119405	0.00573977	1	1	33	731329677	731329677 [843-849]		0	778.421	59.5	63.1	118.8	23.4	102.5	130.2	127.9	79.9	165.2	129.4		High	High	High	High	High	High	High	High	High	High	High	0.0008287	0.01336	1.7	11.55	Used	Used	R.GTFANIR.I	[843-849]
	FALSE	High	[K].KASELGLEVKPWVK.[T]		2.04236e-09	5.33751e-05	1	1	71	731329677	731329677 [576-589]		1	1583.92	55.4	63.6	190.2	93.2	211.7	81	78.8	44	127.4	54.7		High	High	High	High	High	High	High	High	High	High	High	7.23e-06	3.101e-10	5.68	101.8	Used	Used	K.KASELGLEVKPWVK.T	[576-589]
	FALSE	High	[K].IIDWENSAPK.[L]		3.59035e-05	5.33751e-05	1	1	26	731329677	731329677 [184-193]		0	1172.59	63.7	115.9	62.4	101.1	127.3	116.9	93.1	90.8	113.3	115.3		High	High	High	High	Peak Found	High	High	High	High	High	High	7.23e-06	4.268e-06	1.8	18.07	Used	Used	K.IIDWENSAPK.L	[184-193]
	FALSE	High	[R].ILLESAIR.[N]		0.0012464	0.000154279	1	1	47	731329677	731329677 [162-169]		0	914.567	62.4	176.4	79.3	68.9	102.9	96	95.5	73.4	108	137.4		Peak Found	High	High	High	High	High	High	High	High	High	High	2.424e-05	0.0001301	1.95	25.36	Used	Used	R.ILLESAIR.N	[162-169]
	FALSE	High	[K].LLNGEVGPK.[T]		0.0228299	0.00144026	1	1	3	731329677	731329677 [854-862]		0	926.531			8	21.6	40.2	241.7	202.9	18.5	199.1	268		Not Found	Not Found	Peak Found	Peak Found	Peak Found	Peak Found	High	Peak Found	High	High	High	0.0002151	0.002361	2.26	11.52	Used	Used	K.LLNGEVGPK.T	[854-862]
	FALSE	High	[K].LRDGVTATDLVLTATQMLR.[K]		7.34465e-10	5.33751e-05	1	1	101	731329677	731329677 [372-390]		1	2074.13	87.4	151.7	63.8	77.2	23.5	266.8	120.9	64.9	71.9	71.9		High	High	High	High	High	High	High	High	High	High	High	7.23e-06	1.144e-10	4.44	73.86	Used	Used	K.LRDGVTATDLVLTATQMLR.K	[372-390]
	FALSE	High	[K].LRDGVTATDLVLTATQMLR.[K]	1xOxidation [M17]	1.45432e-06	5.33751e-05	1	1	22	731329677	731329677 [372-390]		1	2090.13		37		89.5	160.1	67.5	29.1	63	55.9	497.9		Not Found	High	Not Found	High	High	High	Peak Found	High	High	High	High	7.23e-06	1.863e-07	4.82	74.12	Used	Used	K.LRDGVTATDLVLTATQMLR.K	[372-390]
	FALSE	High	[K].LRDGVTATDLVLTATQMLRK.[H]		3.92788e-08	5.33751e-05	1	1	35	731329677	731329677 [372-391]		2	2202.23	244.1	72.8	62.7	107.3	72.3	98	125	54.2	84.3	79.4		High	High	High	High	High	High	High	High	High	High	High	7.23e-06	5.524e-09	6.15	61.52	Used	Used	K.LRDGVTATDLVLTATQMLRK.H	[372-391]
	FALSE	High	[K].LRDGVTATDLVLTATQMLRK.[H]	1xOxidation [M17]	5.13438e-05	5.33751e-05	1	1	4	731329677	731329677 [372-391]		2	2218.22	501.7	6.7		48.3	220.3		2		4.5	216.5		Peak Found	Peak Found	Not Found	High	High	Not Found	Peak Found	Not Found	Peak Found	High	High	7.23e-06	6.084e-06	3.16	49.13	Used	Used	K.LRDGVTATDLVLTATQMLRK.H	[372-391]
	FALSE	High	[K].LTGRSDDTVSMIEQYLR.[A]		1.24406e-07	5.33751e-05	1	1	27	731329677	731329677 [443-459]		1	1983.98	337.7	159	5.7	154.5	74.7	31.6	89.5	54.1	57.2	36		High	High	High	High	High	High	High	High	High	High	High	7.23e-06	1.702e-08	3.79	56.54	Used	Used	K.LTGRSDDTVSMIEQYLR.A	[443-459]
	FALSE	High	[K].LTGRSDDTVSMIEQYLR.[A]	1xOxidation [M11]	0.0023384	0.000222105	1	1	1	731329677	731329677 [443-459]		1	1999.98			147.8		852.2							Not Found	Not Found	Peak Found	Not Found	High	Not Found	Not Found	Not Found	Not Found	Not Found	High	3.769e-05	0.0002377	1.52	57.66	Used	Used	K.LTGRSDDTVSMIEQYLR.A	[443-459]
	FALSE	High	[K].LVEIPFKPAR.[V]		3.14393e-06	5.33751e-05	1	1	147	731329677	731329677 [194-203]		0	1169.7	154.6	116.3	86.4	108	116.3	91.8	82.1	75.1	78.7	90.8		High	High	High	High	High	High	High	High	High	High	High	7.23e-06	3.966e-07	2.62	22.92	Used	Used	K.LVEIPFKPAR.V	[194-203]
	FALSE	High	[K].LVEIPFKPAR.[V]	1xGG [K7]	0.000826018	0.000154279	1	1	3	731329677	731329677 [194-203]		0	1283.75		188	692.8	15.4	3.9			21.4	8.6	69.9		Not Found	High	High	Peak Found	Peak Found	Not Found	Not Found	Peak Found	Peak Found	Peak Found	High	2.424e-05	8.837e-05	2.61	18.01	Used	Used	K.LVEIPFKPAR.V	[194-203]
	FALSE	High	[R].IVNKLLNGEVGPK.[T]		1.22657e-05	5.33751e-05	1	1	20	731329677	731329677 [850-862]		1	1380.82	380	150.3	16.2	55.6	71.9	10.1	76.1	75.4	86.1	78.2		High	High	Peak Found	High	High	Peak Found	Peak Found	High	High	High	High	7.23e-06	1.496e-06	3.6	15.02	Used	Used	R.IVNKLLNGEVGPK.T	[850-862]
	FALSE	High	[K].LYVFDAAMK.[Y]		0.000185836	9.51359e-05	1	1	41	731329677	731329677 [872-880]		0	1057.54	24.8	123.4	122.3	85	131	99.7	93	123.1	106.1	91.5		High	High	High	High	High	High	High	High	High	High	High	1.696e-05	2.151e-05	1.45	35.03	Used	Used	K.LYVFDAAMK.Y	[872-880]
	FALSE	High	[K].LYVFDAAMK.[Y]	1xOxidation [M8]	0.0142375	0.000935615	1	1	4	731329677	731329677 [872-880]		0	1073.53	16	8.6	63.4	153	134.6	17.6	0.9	45.7	1.9	558.3		Peak Found	Peak Found	High	Peak Found	Peak Found	Peak Found	Peak Found	High	Peak Found	High	High	0.0001355	0.00146	1.27	18.36	Used	Used	K.LYVFDAAMK.Y	[872-880]
	FALSE	High	[K].LYVFDAAMKYK.[E]		0.0260093	0.0016239	1	1	1	731329677	731329677 [872-882]		1	1348.7			169.8	817.8				12.5				Not Found	Not Found	Peak Found	High	Not Found	Not Found	Not Found	Peak Found	Not Found	Not Found	High	0.0002403	0.002672	1.14	34.78	Used	Used	K.LYVFDAAMKYK.E	[872-882]
	FALSE	High	[K].MFVDYNEPQQER.[V]		7.72776e-06	5.33751e-05	1	1	45	731329677	731329677 [463-474]		0	1555.68	149.1	93.7	21.6	61	80.4	118.6	125.4	82	121.4	146.8		High	High	High	High	High	High	High	High	High	High	High	7.23e-06	9.533e-07	3.04	17.09	Used	Used	K.MFVDYNEPQQER.V	[463-474]
	FALSE	High	[K].MFVDYNEPQQER.[V]	1xOxidation [M1]	4.69807e-05	5.33751e-05	1	1	1	731329677	731329677 [463-474]		0	1571.68						75.7	56.1		19.8	848.4		Not Found	Not Found	Not Found	Not Found	Not Found	Peak Found	Peak Found	Not Found	Peak Found	High	High	7.23e-06	5.558e-06	2.3	12.19	Used	Used	K.MFVDYNEPQQER.V	[463-474]
	FALSE	High	[K].MTGKLRDGVTATDLVLTATQMLR.[K]		2.56712e-05	5.33751e-05	1	1	1	731329677	731329677 [368-390]		2	2491.34	880.6	119.4										High	Peak Found	Not Found	Not Found	Not Found	Not Found	Not Found	Not Found	Not Found	Not Found	High	7.23e-06	3.079e-06	3.82	70.09	Used	Used	K.MTGKLRDGVTATDLVLTATQMLR.K	[368-390]
	FALSE	High	[R].NCDGFQVTKDDVEK.[I]	1xCarbamidomethyl [C2]	2.51007e-07	5.33751e-05	1	1	16	731329677	731329677 [170-183]		1	1654.74	4.2	81.9	10	100.4	80.9	173.5	82.4	99.6	147.2	219.9		Peak Found	High	Peak Found	Peak Found	Peak Found	High	High	High	High	High	High	7.23e-06	3.366e-08	4.28	11.12	Used	Used	R.NCDGFQVTKDDVEK.I	[170-183]
	FALSE	High	[R].NCDGFQVTKDDVEKIIDWENSAPK.[L]	1xCarbamidomethyl [C2]	4.13396e-08	5.33751e-05	1	1	59	731329677	731329677 [170-193]		2	2808.31	31.3	147.9	93	120.5	47.4	214.5	110.3	69.3	74.5	91.2		High	High	High	High	High	High	High	High	High	High	High	7.23e-06	5.792e-09	6.2	63.34	Used	Used	R.NCDGFQVTKDDVEKIIDWENSAPK.L	[170-193]
	FALSE	High	[K].NLNSDPNKINPLVPVDLVIDHSVQVDVAR.[S]		6.02276e-11	5.33751e-05	1	1	22	731329677	731329677 [227-255]		1	3180.7	283.7	106.2	240.9	40.1	4.8	71.1	99.5	71.4	47.2	35.1		High	High	High	High	Peak Found	High	High	High	High	High	High	7.23e-06	9.964e-12	5.77	105.07	Used	Used	K.NLNSDPNKINPLVPVDLVIDHSVQVDVAR.S	[227-255]
	FALSE	High	[R].SDDTVSMIEQYLR.[A]		1.43419e-06	5.33751e-05	1	1	94	731329677	731329677 [447-459]		0	1556.73	101.9	175.5	85.8	95.8	57.7	127.1	110.5	102.5	98.3	44.9		High	High	High	High	High	High	High	High	High	High	High	7.23e-06	1.84e-07	2.62	69.56	Used	Used	R.SDDTVSMIEQYLR.A	[447-459]
	FALSE	High	[R].SDDTVSMIEQYLR.[A]	1xOxidation [M7]	3.89332e-05	5.33751e-05	1	1	20	731329677	731329677 [447-459]		0	1572.72	17.9	34.6	0.7	109.1	180.8	145.3	13.9	53	28.7	416		Peak Found	High	Peak Found	High	High	High	Peak Found	High	Peak Found	High	High	7.23e-06	4.625e-06	2.16	69.55	Used	Used	R.SDDTVSMIEQYLR.A	[447-459]
	FALSE	High	[R].SENAVQANMEFEFK.[R]		1.75617e-05	5.33751e-05	1	1	1	731329677	731329677 [256-269]		0	1643.74	307.8	474.7	17	74.1	14.1				30.8	81.4		Peak Found	High	Peak Found	Peak Found	Peak Found	Not Found	Not Found	Not Found	Peak Found	Peak Found	High	7.23e-06	2.121e-06	2.17	36.17	Used	Used	R.SENAVQANMEFEFK.R	[256-269]
	FALSE	High	[R].SENAVQANMEFEFKR.[N]		1.29483e-06	5.33751e-05	1	1	50	731329677	731329677 [256-270]		1	1799.84	104.6	117.4	170.6	126.6	109.4	100.9	59.9	79.9	72.8	57.9		High	High	High	High	High	High	High	High	High	High	High	7.23e-06	1.667e-07	3.42	26.44	Used	Used	R.SENAVQANMEFEFKR.N	[256-270]
	FALSE	High	[K].SFTCTLR.[F]	1xCarbamidomethyl [C4]	0.0173214	0.00113035	1	1	14	731329677	731329677 [983-989]		0	884.429		44	201.7	10.4	21.7	223.4	140	73.7	143	142.1		Not Found	High	High	Peak Found	Peak Found	High	High	High	High	High	High	0.0001691	0.001784	1.21	11.28	Used	Used	K.SFTCTLR.F	[983-989]
	FALSE	High	[K].SFTCTLRFDTEVELAYFDHGGILPYVIR.[Q]	1xCarbamidomethyl [C4]	4.09587e-06	5.33751e-05	1	1	2	731329677	731329677 [983-1010]		1	3319.65		132	98.6	325.8	54.8		122		192.7	74.2		Not Found	High	Peak Found	Peak Found	Peak Found	Not Found	High	Not Found	Peak Found	Peak Found	High	7.23e-06	5.115e-07	2.99	105.74	Used	Used	K.SFTCTLRFDTEVELAYFDHGGILPYVIR.Q	[983-1010]
	FALSE	High	[R].SNLVGMGVIPLCFK.[A]	1xCarbamidomethyl [C12]	2.57499e-06	5.33751e-05	1	1	62	731329677	731329677 [928-941]		0	1534.81	20.6	152.3	56.1	118.8	101.3	79.8	75	172.1	118	105.8		High	High	High	High	High	High	High	High	High	High	High	7.23e-06	3.261e-07	3.78	62.38	Used	Used	R.SNLVGMGVIPLCFK.A	[928-941]
	FALSE	High	[R].SNLVGMGVIPLCFK.[A]	1xCarbamidomethyl [C12]; 1xOxidation [M6]	0.00135496	0.000154279	1	1	3	731329677	731329677 [928-941]		0	1550.81	1.4	7.3	30.7	50.4		100.9	23.4			786		Peak Found	Peak Found	Peak Found	Peak Found	Not Found	Peak Found	Peak Found	Not Found	Not Found	High	High	2.424e-05	0.0001408	1.52	43.69	Used	Used	R.SNLVGMGVIPLCFK.A	[928-941]
	FALSE	High	[R].SNLVGMGVIPLCFKAGEDADTLGLTGHER.[Y]	1xCarbamidomethyl [C12]	3.50781e-07	5.33751e-05	1	1	5	731329677	731329677 [928-956]		1	3057.51	7.7	255.2		62.6	56.1		77.2	197.3	129.8	214.2		Peak Found	High	Not Found	High	Peak Found	Not Found	Peak Found	High	High	High	High	7.23e-06	4.676e-08	4.36	57.55	Used	Used	R.SNLVGMGVIPLCFKAGEDADTLGLTGHER.Y	[928-956]
	FALSE	High	[R].STYEAITK.[G]		0.00277281	0.000222105	1	1	15	731329677	731329677 [732-739]		0	912.467	69	34.5	134.3	34.9	55.8	190.8	279	60.9	99.4	41.3		High	High	High	Peak Found	Peak Found	High	High	High	High	Peak Found	High	3.769e-05	0.0002808	1.63	9.96	Used	Used	R.STYEAITK.G	[732-739]
	FALSE	High	[R].STYEAITKGNPMWNSLEVPTGTLYQWDSK.[S]		3.54603e-08	5.33751e-05	1	1	9	731329677	731329677 [732-760]		1	3316.58	498.4	129.7		147.5	48.2		31.1	68.4	50.9	25.9		High	High	Not Found	High	Peak Found	Not Found	High	High	High	Peak Found	High	7.23e-06	5.007e-09	4.88	68.61	Used	Used	R.STYEAITKGNPMWNSLEVPTGTLYQWDSK.S	[732-760]
	FALSE	High	[K].STYIHEPPYFK.[D]		9.78291e-06	5.33751e-05	1	1	39	731329677	731329677 [761-771]		0	1381.68	120.9	118.1	191.1	88.8	76.4	139	108.2	50.1	33.9	73.4		High	High	High	Peak Found	High	High	High	High	Peak Found	High	High	7.23e-06	1.198e-06	1.65	87.38	Used	Used	K.STYIHEPPYFK.D	[761-771]
	FALSE	High	[K].STYIHEPPYFKDMSLNPPGPFGVK.[D]		0.000131357	9.51359e-05	1	1	14	731329677	731329677 [761-784]		1	2721.34	113.1	78.2	30.1	406.3	12.5	35.5	41.8	120.3	85.1	77		High	High	High	High	High	High	High	Peak Found	High	Peak Found	High	1.364e-05	1.539e-05	3.34	52.86	Used	Used	K.STYIHEPPYFKDMSLNPPGPFGVK.D	[761-784]
	FALSE	High	[K].SVYFRDIWPSNEEIAQVVQSSVLPDMFR.[S]		3.22096e-09	5.33751e-05	1	1	31	731329677	731329677 [704-731]		1	3312.64	265.1	138.5	40.6	78	197	6.9	93.2	45.8	120.3	14.8		High	High	High	High	High	Peak Found	High	High	High	High	High	7.23e-06	4.816e-10	3.51	100.54	Used	Used	K.SVYFRDIWPSNEEIAQVVQSSVLPDMFR.S	[704-731]
	FALSE	High	[K].TSLAPGSGVVTK.[Y]		4.63571e-05	5.33751e-05	1	1	38	731329677	731329677 [590-601]		0	1116.63	47.5	85	159.5	23.4	37.3	144.9	150.1	61.9	122.7	167.6		High	High	High	High	High	High	High	High	High	High	High	7.23e-06	5.493e-06	2.51	10.7	Used	Used	K.TSLAPGSGVVTK.Y	[590-601]
	FALSE	High	[K].TSLAPGSGVVTKYLLK.[S]		4.02057e-06	5.33751e-05	1	1	3	731329677	731329677 [590-605]		1	1633.95	547.9	134.2			99			139	50.9	28.9		High	High	Not Found	Not Found	Peak Found	Not Found	Not Found	Peak Found	Peak Found	Peak Found	High	7.23e-06	5.023e-07	3.9	36.28	Used	Used	K.TSLAPGSGVVTKYLLK.S	[590-605]
	FALSE	High	[K].TVHVPTGEKLYVFDAAMK.[Y]		9.51496e-05	5.33751e-05	1	1	17	731329677	731329677 [863-880]		1	2006.04	258.8	163.1	28.2	212.8	67.8	32.3	40.9	48.1	84.7	63.4		High	High	Peak Found	High	Peak Found	Peak Found	Peak Found	High	High	High	High	7.23e-06	1.119e-05	2.67	33.52	Used	Used	K.TVHVPTGEKLYVFDAAMK.Y	[863-880]
	FALSE	High	[R].VEKLPYSIR.[I]		0.000895687	0.000154279	1	1	42	731329677	731329677 [153-161]		1	1104.64	73.5	114.2	216.6	78.2	98.8	78.9	78.5	79.6	64	117.8		High	High	High	High	High	High	High	High	High	High	High	2.424e-05	9.53e-05	2.02	9.83	Used	Used	R.VEKLPYSIR.I	[153-161]
	FALSE	High	[K].VGFKGFAIPKEEQEK.[V]		3.17805e-05	5.33751e-05	1	1	15	731329677	731329677 [518-532]		2	1706.91	231	51.5	91.2	192.5	200.3	41.6	54.9	47.2	43.9	45.8		High	High	Peak Found	High	High	High	High	Peak Found	High	High	High	7.23e-06	3.798e-06	2.82	12.94	Used	Used	K.VGFKGFAIPKEEQEK.V	[518-532]
	FALSE	High	[R].VLLQDFTGVPAVVDLAAMR.[D]		3.25105e-09	5.33751e-05	1	1	120	731329677	731329677 [204-222]		0	2015.1	174.7	183.7	122	81.5	24.6	73.2	92.9	74.2	133.9	39.4		High	High	High	High	High	High	High	High	High	High	High	7.23e-06	4.86e-10	3.66	85.29	Used	Used	R.VLLQDFTGVPAVVDLAAMR.D	[204-222]
	FALSE	High	[R].VLLQDFTGVPAVVDLAAMR.[D]	1xOxidation [M18]	0.000290966	0.000126394	1	1	13	731329677	731329677 [204-222]		0	2031.09	36.9	75.5	8.8	99.6	368.1	20.1	12.7	44.1	78.6	255.8		Peak Found	High	Peak Found	High	High	Peak Found	Peak Found	Peak Found	High	High	High	1.859e-05	3.284e-05	2.53	75.25	Used	Used	R.VLLQDFTGVPAVVDLAAMR.D	[204-222]
	FALSE	High	[R].VLLQDFTGVPAVVDLAAMRDAMK.[N]		2.96241e-09	5.33751e-05	1	1	31	731329677	731329677 [204-226]		1	2460.3	399.6	202.5	15.8	120.6	20.1	26.4	66.2	49.3	80.9	18.7		High	High	Peak Found	High	Peak Found	Peak Found	High	High	High	High	High	7.23e-06	4.456e-10	5.77	81.83	Used	Used	R.VLLQDFTGVPAVVDLAAMRDAMK.N	[204-226]
	FALSE	High	[R].VLLQDFTGVPAVVDLAAMRDAMK.[N]	1xOxidation [M]	0.106266	0.0051357	1	1	2	731329677	731329677 [204-226]		1	2476.29		288.7		381.9	329.5							Not Found	Peak Found	Not Found	High	Peak Found	Not Found	Not Found	Not Found	Not Found	Not Found	High	0.0007432	0.01169	1.3	81.97	Used	Used	R.VLLQDFTGVPAVVDLAAMRDAMK.N	[204-226]
	FALSE	High	[R].VPLKEMKDDWHSCLNSK.[V]	1xCarbamidomethyl [C13]	4.07691e-06	5.33751e-05	1	1	2	731329677	731329677 [501-517]		2	2087		10.8	24.5	475.1	482.2	2.8		4.6				Not Found	Peak Found	Peak Found	High	Peak Found	Peak Found	Not Found	Peak Found	Not Found	Not Found	High	7.23e-06	5.106e-07	3.71	11.81	Used	Used	R.VPLKEMKDDWHSCLNSK.V	[501-517]
	FALSE	High	[K].VSEIRPGQDITVTTDTGK.[S]		4.93998e-09	5.33751e-05	1	1	29	731329677	731329677 [965-982]		0	1916.99	21.9	76.3		45.5	66.3	181.9	151.5	114.5	123.8	218.4		High	High	Not Found	High	High	High	High	High	High	High	High	7.23e-06	7.308e-10	4.99	11.95	Used	Used	K.VSEIRPGQDITVTTDTGK.S	[965-982]
	FALSE	High	[R].VYSSYLELDLADVEPCISGPK.[R]	1xCarbamidomethyl [C16]	1.35466e-08	5.33751e-05	1	1	31	731329677	731329677 [475-495]		0	2355.14	35.8	323.6	148.1	82.5	21	66.2	78.4	108.8	84.4	51.3		High	High	High	High	Peak Found	High	High	High	High	High	High	7.23e-06	1.959e-09	4.14	70.17	Used	Used	R.VYSSYLELDLADVEPCISGPK.R	[475-495]
	FALSE	High	[K].WGSTAFQNMLVVPPGSGIVHQVNLEYLGR.[V]		9.57302e-10	5.33751e-05	1	1	63	731329677	731329677 [280-308]		0	3169.63	86	152.6	138.1	116	39.1	83.8	94	171.3	85.4	33.8		High	High	High	High	High	High	High	High	High	High	High	7.23e-06	1.48e-10	5.47	77.99	Used	Used	K.WGSTAFQNMLVVPPGSGIVHQVNLEYLGR.V	[280-308]
	FALSE	High	[K].WGSTAFQNMLVVPPGSGIVHQVNLEYLGR.[V]	1xOxidation [M9]	2.45816e-06	5.33751e-05	1	1	5	731329677	731329677 [280-308]		0	3185.62				142.5						857.5		Not Found	Not Found	Not Found	High	Not Found	High	Not Found	Not Found	Not Found	High	High	7.23e-06	3.116e-07	2.89	59.06	Used	Used	K.WGSTAFQNMLVVPPGSGIVHQVNLEYLGR.V	[280-308]
	FALSE	High	[K].YKEAGHQTIVLAGAEYGSGSSR.[D]		8.40464e-10	5.33751e-05	1	1	26	731329677	731329677 [881-902]		1	2281.12	52.3	44.6	246.9	83.9	127.5	82.6	97.2	105.6	80.5	78.8		High	High	High	High	High	High	High	High	High	Peak Found	High	7.23e-06	1.304e-10	7.41	9.32	Used	Used	K.YKEAGHQTIVLAGAEYGSGSSR.D	[881-902]
	FALSE	High	[K].YKEAGHQTIVLAGAEYGSGSSRDWAAK.[G]		1.46109e-06	5.33751e-05	1	1	8	731329677	731329677 [881-907]		2	2852.4	162.6	78.6	23.5	91.3	53	126	15.2	171.9	104.2	173.6		High	High	Peak Found	High	Peak Found	Peak Found	Peak Found	High	High	High	High	7.23e-06	1.873e-07	4.53	21.19	Used	Used	K.YKEAGHQTIVLAGAEYGSGSSRDWAAK.G	[881-907]
	FALSE	High	[R].YTIDLPSK.[V]		0.00038276	0.000126394	1	1	41	731329677	731329677 [957-964]		0	936.504	127.6	99.5	23	39.9	60	159.7	115	73.6	129.2	172.6		High	High	High	High	High	High	High	High	High	High	High	1.859e-05	4.253e-05	1.69	17.16	Used	Used	R.YTIDLPSK.V	[957-964]
	FALSE	High	[R].YTIDLPSKVSEIRPGQDITVTTDTGK.[S]		5.11169e-05	5.33751e-05	1	1	6	731329677	731329677 [957-982]		1	2834.48	344.6	160		112.9		42	67.3	133.7	45.3	94.1		High	High	Not Found	High	Not Found	Peak Found	High	High	Peak Found	Peak Found	High	7.23e-06	6.047e-06	3	95.26	Used	Used	R.YTIDLPSKVSEIRPGQDITVTTDTGK.S	[957-982]
FALSE		High	Master Protein	-1705944856186892885	1923	1108966238	PREDICTED: sucrose synthase isoform X2 [Beta vulgaris subsp. vulgaris]	MASRLTRVPSLKERLDETLTAQRNEIISFLKRIASHGKGILQPHEVLSEFEAVADKHKLADGPFGEVLRHTQETIVLPPWITLAVRPRPGVWEYIRVNVDALAVEELTPSQFLHVKEELVDGSTNGNFVLELDFEPFTASFPRPTLSKSIGNGVEFLNRHLSAKMFHDKESMRPLLDFLRMHHYKGKTIMLNDRIQNLDSLQAVLRKAEEFLTTIPADTPYSEFDHKFQEIGLERGWGDNAERVMDMIQLLLDLLEAPDSCTLEKFLGRIPMVFNVVILTPHGYFAQANVLGYPDTGGQVVYILDQVRALEHEMLLRIKQQGLDIVPRILIVSRLLPDAVGTTCGQRLEKVFGTEHSHILRVPFRTEKGIVRRWISRFEVWPYLETYTEDVANEIAGEL…	>gi|1108966238|ref|XP_019106894.1| PREDICTED: sucrose synthase isoform X2 [Beta vulgaris subsp. vulgaris]	0	906.347	72	77	4460	15	69	805	92.2	6.37	10551.8	72	4460	77	10	85.9	74	102.8	91.7	96	124.6	122.4	86.9	112	103.8	3.22307e+09	5.63842e+09	4.84697e+09	3.55349e+09	1.4257e+09	7.81752e+09	3.93767e+09	3.93688e+09	6.2221e+09	5.552e+09	6.55012e+09	5.63842e+09	7.83881e+09	6.98729e+09	7.31422e+09
	Checked	Confidence	Annotated Sequence	Modifications	Qvality PEP	Qvality q-value	# Protein Groups	# Proteins	# PSMs	Master Protein Accessions	Positions in Master Proteins	Modifications in Master Proteins	# Missed Cleavages	Theo. MH+ [Da]	Abundances (Scaled): F1: Control	Abundances (Scaled): F2: Control	Abundances (Scaled): F3: Control	Abundances (Scaled): F4: Control	Abundances (Scaled): F5: Control	Abundances (Scaled): F6: Sample	Abundances (Scaled): F7: Sample	Abundances (Scaled): F8: Sample	Abundances (Scaled): F9: Sample	Abundances (Scaled): F10: Sample	Quan Info	Found in Sample: [S1] F1: Control	Found in Sample: [S2] F2: Control	Found in Sample: [S3] F3: Control	Found in Sample: [S4] F4: Control	Found in Sample: [S5] F5: Control	Found in Sample: [S6] F6: Sample	Found in Sample: [S7] F7: Sample	Found in Sample: [S8] F8: Sample	Found in Sample: [S9] F9: Sample	Found in Sample: [S10] F10: Sample	Confidence (by Search Engine): Sequest HT	Percolator q-Value (by Search Engine): Sequest HT	Percolator PEP (by Search Engine): Sequest HT	XCorr (by Search Engine): Sequest HT	Top Apex RT [min]	Quan Usage	Quan Ratio Usage	Sequence in Protein	Positions in Proteins
	FALSE	High	[K].AADIIVDFFEK.[SC]		1.87266e-05	5.33751e-05	2	3	104	1108966238; 731348913	1108966238 [715-725]; 731348913 [705-715]		0	1267.66	28.6	80.4	138.7	101.8	48	197.2	124.9	104.9	81	94.5	Shared	High	High	High	High	High	High	High	High	High	High	High	7.23e-06	2.262e-06	2.08	71.97	Used	Used	K.AADLLVDFFEK.S	[715-725]
	FALSE	High	[K].AADLLVDFFEKSTADPSYWENISK.[G]		0.0882498	0.00441887	1	2	2	1108966238	1108966238 [715-738]		1	2746.32				55	101.2		350	33.8	366.6	93.4		Not Found	Not Found	Not Found	Peak Found	Peak Found	Not Found	Peak Found	Peak Found	High	High	High	0.0006307	0.009427	1.18	90.56	Used	Used	K.AADLLVDFFEKSTADPSYWENISK.G	[715-738]
	FALSE	High	[K].AEEFLTTIPADTPYSEFDHKFQEIGLER.[G]		4.44621e-07	5.33751e-05	1	2	6	1108966238	1108966238 [208-235]		1	3283.58	90.8	108.9		125.8	73.5	269.8	80.6	88.1	105.6	56.9		Peak Found	Peak Found	Not Found	High	Peak Found	High	Peak Found	High	High	High	High	7.23e-06	5.873e-08	4.55	64.95	Used	Used	K.AEEFLTTIPADTPYSEFDHKFQEIGLER.G	[208-235]
	FALSE	High	[R].ALEHEMLLR.[I]		9.24089e-05	5.33751e-05	1	2	128	1108966238	1108966238 [309-317]		0	1111.59	106	56.4	93	88.7	150.7	109.4	116.5	92.6	95.7	91		High	High	High	High	High	High	High	High	High	High	High	7.23e-06	1.085e-05	1.67	13.29	Used	Used	R.ALEHEMLLR.I	[309-317]
	FALSE	High	[R].ALEHEMLLR.[I]	1xOxidation [M6]	0.00101198	0.000154279	1	2	13	1108966238	1108966238 [309-317]		0	1127.59	20.8	29.6	115.3	59.6	12.8	95.2	96.9	15.5	58.5	495.7		Peak Found	High	Peak Found	High	High	High	High	Peak Found	High	High	High	2.424e-05	0.000107	2.09	9.62	Used	Used	R.ALEHEMLLR.I	[309-317]
	FALSE	High	[K].DTVGQYESHMAFTLPGLYR.[V]		0.000349989	0.000126394	1	2	2	1108966238	1108966238 [486-504]		0	2185.04	180	40.4		44.2	251.1	193.9	15.2	118	63.7	93.6		Peak Found	Peak Found	Not Found	Peak Found	High	High	Peak Found	Peak Found	Peak Found	Peak Found	High	1.859e-05	3.917e-05	2.13	59.58	Used	Used	K.DTVGQYESHMAFTLPGLYR.V	[486-504]
	FALSE	High	[R].ELVNLVVVAGDR.[RS]		2.25925e-05	5.33751e-05	2	3	60	1108966238; 731348913	1108966238 [597-608]; 731348913 [587-598]		0	1283.73	166.5	171	61.3	93.9	55.8	59.2	36.3	187.4	79.8	88.7	Shared	High	High	High	High	High	High	High	High	High	High	High	7.23e-06	2.716e-06	2.48	40.36	Used	Used	R.ELVNLVVVAGDR.R	[597-608]
	FALSE	High	[R].ELVNLVVVAGDRR.[K]		1.77236e-05	5.33751e-05	1	2	35	1108966238	1108966238 [597-609]		1	1439.83	136.5	63.8	143	210.1	132.6	32.9	19.6	133.8	56.2	71.5		High	High	High	High	High	High	High	High	High	High	High	7.23e-06	2.142e-06	3.59	29.45	Used	Used	R.ELVNLVVVAGDRR.K	[597-609]
	FALSE	High	[K].ERLDETLTAQR.[N]		6.57181e-06	5.33751e-05	1	1	28	1108966238	1108966238 [13-23]		1	1331.69	49	121.3	97	197.3	59.6	94.8	38.3	110.2	107.3	125.2		High	High	Peak Found	High	High	High	High	High	High	High	High	7.23e-06	8.136e-07	2.46	9.16	Used	Used	K.ERLDETLTAQR.N	[13-23]
	FALSE	High	[K].ESMRPLLDFLR.[M]		0.000236993	9.51359e-05	1	2	85	1108966238	1108966238 [170-180]		0	1376.74	19.8	28.9	196.9	65	75.9	222.8	162.7	56.4	103	68.6		High	High	High	High	High	High	High	High	High	High	High	1.696e-05	2.698e-05	2.46	109.4	Used	Used	K.ESMRPLLDFLR.M	[170-180]
	FALSE	High	[K].ESMRPLLDFLR.[M]	1xOxidation [M3]	0.00230279	0.000222105	1	2	5	1108966238	1108966238 [170-180]		0	1392.73			0.8		152.2	249.3	37.1	53.9	15	491.6		Not Found	Not Found	Peak Found	Not Found	High	High	Peak Found	Peak Found	Peak Found	High	High	3.769e-05	0.0002346	2.26	44.99	Used	Used	K.ESMRPLLDFLR.M	[170-180]
	FALSE	High	[K].FNIVSPGADLSIYFNYTEEK.[K]		3.31751e-07	5.33751e-05	1	2	54	1108966238	1108966238 [516-535]		0	2307.12	34.5	130.6	155.8	107.2	11.3	120.1	164.6	117.8	99.7	58.3		High	High	High	High	Peak Found	High	High	High	High	High	High	7.23e-06	4.419e-08	3.78	78.73	Used	Used	K.FNIVSPGADLSIYFNYTEEK.K	[516-535]
	FALSE	High	[K].FNIVSPGADLSIYFNYTEEKKR.[L]		2.91889e-06	5.33751e-05	1	2	19	1108966238	1108966238 [516-537]		2	2591.31	112.5	142.7	333.3	11.4	5.6	56.3	144.6	62.5	112.3	18.9		High	High	High	High	Peak Found	High	High	High	High	High	High	7.23e-06	3.688e-07	4.34	108.2	Used	Used	K.FNIVSPGADLSIYFNYTEEKKR.L	[516-537]
	FALSE	High	[K].FQEIGLER.[G]		0.000609139	0.000126394	1	2	21	1108966238	1108966238 [228-235]		0	991.521	14.2	57.7	1.6	45.8	99.1	210.3	177.2	102.1	132.1	160		Peak Found	High	Peak Found	High	High	High	High	High	High	High	High	1.859e-05	6.624e-05	1.48	16.54	Used	Used	K.FQEIGLER.G	[228-235]
	FALSE	High	[R].GAFVQPAYYEAFGLTVVEAMTCGLPTFATCHGGPAEIIVHGK.[S]	2xCarbamidomethyl [C22; C30]	1.28304e-09	5.33751e-05	1	2	64	1108966238	1108966238 [661-702]		0	4467.16	1.5	45.8	173.8	193.5	88.2	52.9	33.6	203.8	143.1	63.8		Peak Found	High	High	High	High	High	High	High	High	High	High	7.23e-06	1.968e-10	5.73	106.75	Used	Used	R.GAFVQPAYYEAFGLTVVEAMTCGLPTFATCHGGPAEIIVHGK.S	[661-702]
	FALSE	High	[R].GAFVQPAYYEAFGLTVVEAMTCGLPTFATCHGGPAEIIVHGK.[S]	2xCarbamidomethyl [C22; C30]; 1xOxidation [M20]	1.39549e-05	5.33751e-05	1	2	3	1108966238	1108966238 [661-702]		0	4483.16		73		680.6	8.2		86.5	24.5	49.2	78		Not Found	Peak Found	Not Found	High	Peak Found	Not Found	Peak Found	Peak Found	Peak Found	High	High	7.23e-06	1.694e-06	4.53	100.07	Used	Used	R.GAFVQPAYYEAFGLTVVEAMTCGLPTFATCHGGPAEIIVHGK.S	[661-702]
	FALSE	High	[K].GKTIMLNDRIQNLDSLQAVLR.[K]		0.000167246	9.51359e-05	1	2	3	1108966238	1108966238 [186-206]		2	2398.32	485.6	72.6		26.1	8.8	22.5	13.5	101.2	221.1	48.6		High	Peak Found	Not Found	Peak Found	Peak Found	Peak Found	Peak Found	Peak Found	Peak Found	Peak Found	High	1.696e-05	1.945e-05	3.03	96.79	Used	Used	K.GKTIMLNDRIQNLDSLQAVLR.K	[186-206]
	FALSE	High	[K].GILQPHEVLSEFEAVADK.[H]		6.63114e-07	5.33751e-05	1	1	28	1108966238	1108966238 [39-56]		0	1982.02	39.1	63.8	217.8	79.7	138.3	109.3	89.2	75.7	60.4	126.6		High	High	High	High	High	High	High	High	High	High	High	7.23e-06	8.664e-08	5.03	60.89	Used	Used	K.GILQPHEVLSEFEAVADK.H	[39-56]
	FALSE	High	[K].GILQPHEVLSEFEAVADKHK.[L]		8.28825e-10	5.33751e-05	1	1	215	1108966238	1108966238 [39-58]		1	2247.18	46.1	48.6	74.1	86.8	51.1	279.6	148.1	36.6	73.6	155.5		High	High	High	High	High	High	High	High	High	High	High	7.23e-06	1.287e-10	6.53	46.88	Used	Used	K.GILQPHEVLSEFEAVADKHK.L	[39-58]
	FALSE	High	[K].GILQPHEVLSEFEAVADKHKLADGPFGEVLR.[H]		5.09465e-11	5.33751e-05	1	1	54	1108966238	1108966238 [39-69]		2	3401.79	455.9	72.1	52.1	126.1	5	55.3	134.4	1.7	75.9	21.4		High	High	High	High	Peak Found	High	High	High	High	High	High	7.23e-06	8.458e-12	8.26	73.07	Used	Used	K.GILQPHEVLSEFEAVADKHKLADGPFGEVLR.H	[39-69]
	FALSE	High	[R].GWGDNAER.[V]		0.0526905	0.00297042	1	2	2	1108966238	1108966238 [236-243]		0	904.391						944.9	55.1					Not Found	Not Found	Not Found	Not Found	Not Found	High	High	Not Found	Not Found	Not Found	High	0.0004361	0.005445	0.94	10.02	Used	Used	R.GWGDNAER.V	[236-243]
	FALSE	High	[R].HTQETIVLPPWITLAVRPRPGVWEYIR.[V]		3.56171e-11	5.33751e-05	1	1	223	1108966238	1108966238 [70-96]		0	3227.78	53.8	92.8	124.9	111.9	24.9	84.2	208.2	100.1	158.5	40.7		High	High	High	High	High	High	High	High	High	High	High	7.23e-06	5.976e-12	5.41	103.49	Used	Used	R.HTQETIVLPPWITLAVRPRPGVWEYIR.V	[70-96]
	FALSE	High	[R].KAEEFLTTIPADTPYSEFDHK.[F]		8.52279e-07	5.33751e-05	1	2	61	1108966238	1108966238 [207-227]		1	2439.17	31.2	72.4	99.9	114.7	158.9	109.4	135.6	98	87.2	92.8		High	High	High	High	High	High	High	High	High	High	High	7.23e-06	1.107e-07	4.22	100.2	Used	Used	R.KAEEFLTTIPADTPYSEFDHK.F	[207-227]
	FALSE	High	[R].KAEEFLTTIPADTPYSEFDHKFQEIGLER.[G]		6.33875e-11	5.33751e-05	1	2	133	1108966238	1108966238 [207-235]		2	3411.67	130.1	59.7	124.6	116	49.8	175.6	76.6	65.9	84.6	117.1		High	High	High	High	High	High	High	High	High	High	High	7.23e-06	1.048e-11	7.9	58.33	Used	Used	R.KAEEFLTTIPADTPYSEFDHKFQEIGLER.G	[207-235]
	FALSE	High	[RK].KKPIIFSMAR.[L]		0.000219883	9.51359e-05	2	5	123	1108966238; 1108911770	1108966238 [566-575]; 1108911770 [573-582]		1	1190.71	70	30.3	73.3	64.6	120.1	135.9	136.1	65.8	195.7	108.4	Shared	High	High	High	High	High	High	High	High	High	High	High	1.696e-05	2.517e-05	2.22	11.92	Used	Used	R.KKPIIFSMAR.L	[566-575]
	FALSE	High	[RK].KKPIIFSMAR.[L]	1xOxidation [M8]	0.0081361	0.000556166	2	5	19	1108966238; 1108911770	1108966238 [566-575]; 1108911770 [573-582]		1	1206.7	59.5	0.6	23.2	56.2	15.7	260.9	130.9	97.3	237.4	118.3	Shared	High	Peak Found	Peak Found	High	Peak Found	High	High	High	Peak Found	High	High	8.164e-05	0.0008316	1.7	10.12	Used	Used	R.KKPIIFSMAR.L	[566-575]
	FALSE	High	[RK].KKPIIFSMAR.[L]	1xGG [K2]	0.000666889	0.000126394	2	5	6	1108966238; 1108911770	1108966238 [566-575]; 1108911770 [573-582]		1	1304.75	11.7	80.4	430.1	24.2		160	182.6	55	54.6	1.3	Shared	Peak Found	High	High	Peak Found	Not Found	Peak Found	High	High	Peak Found	Peak Found	High	1.859e-05	7.22e-05	2.96	12.58	Used	Used	R.KKPIIFSMAR.L	[566-575]
	FALSE	High	[K].KLAESVPLAIEDAN.[-]		2.95572e-05	5.33751e-05	1	2	46	1108966238	1108966238 [792-805]		1	1469.78	54.3	158.7	40.8	67.1	59.8	132.3	106.5	133.7	122.6	124.1		High	High	Peak Found	High	High	High	High	High	High	High	High	7.23e-06	3.536e-06	3.75	30.38	Used	Used	K.KLAESVPLAIEDAN.-	[792-805]
	FALSE	High	[K].KLRELVNLVVVAGDR.[R]		0.0682826	0.00357702	1	2	2	1108966238	1108966238 [594-608]		2	1681.01				1000								Not Found	Not Found	Not Found	High	Not Found	Not Found	Not Found	Not Found	Not Found	Not Found	High	0.0005179	0.00711	2.31	31.6	Used	Used	K.KLRELVNLVVVAGDR.R	[594-608]
	FALSE	High	[K].KMYGLIEEYNLNGQFR.[W]		8.26383e-08	5.33751e-05	1	2	29	1108966238	1108966238 [623-638]		1	1974.97	3.8	52.3	19.7	73.3	58.7	360.7	57.6	185.9	68.2	119.7		Peak Found	High	High	High	High	High	High	High	High	High	High	7.23e-06	1.14e-08	4.38	44.94	Used	Used	K.KMYGLIEEYNLNGQFR.W	[623-638]
	FALSE	High	[K].KPIIFSMAR.[L]		0.000298747	0.000126394	2	5	7	1108966238; 1108911770	1108966238 [567-575]; 1108911770 [574-582]		0	1062.61	53.7	4.4		358.9	267.5	71.2	74.5	41.6	70.9	57.2	Shared	High	Peak Found	Not Found	High	High	Peak Found	High	High	High	Peak Found	High	1.859e-05	3.363e-05	2.36	17.57	Used	Used	K.KPIIFSMAR.L	[567-575]
	FALSE	High	[K].LADGPFGEVLR.[H]		6.75697e-06	5.33751e-05	1	1	202	1108966238	1108966238 [59-69]		0	1173.63	104.5	137.5	121.9	64	128.2	102.2	86.6	64.1	84.6	106.3		High	High	High	High	High	High	High	High	High	High	High	7.23e-06	8.357e-07	2.54	39.21	Used	Used	K.LADGPFGEVLR.H	[59-69]
	FALSE	High	[K].LADGPFGEVLRHTQETIVLPPWITLAVRPRPGVWEYIR.[V]		0.00567975	0.00046303	1	1	1	1108966238	1108966238 [59-96]		1	4382.39		194.9	159.4	139.7			235.4		270.6			Not Found	Peak Found	Peak Found	Peak Found	Not Found	Not Found	Peak Found	Not Found	High	Not Found	High	6.693e-05	0.0005709	4.11	108.86	Used	Used	K.LADGPFGEVLRHTQETIVLPPWITLAVRPRPGVWEYIR.V	[59-96]
	FALSE	High	[K].LAESVPLAIEDAN.[-]		0.00026454	9.51359e-05	1	2	15	1108966238	1108966238 [793-805]		0	1341.69	1	228.1	0.5	28.9	80	143.8	116.2	105	167.3	129.1		Peak Found	High	Peak Found	High	Peak Found	High	High	High	High	High	High	1.696e-05	2.995e-05	2.03	42.35	Used	Used	K.LAESVPLAIEDAN.-	[793-805]
	FALSE	High	[R].IASHGKGILQPHEVLSEFEAVADKHK.[L]		1.55844e-05	5.33751e-05	1	1	2	1108966238	1108966238 [33-58]		2	2840.51	628.5			272.9			75.8			22.8		High	Not Found	Not Found	High	Not Found	Not Found	Peak Found	Not Found	Not Found	Peak Found	High	7.23e-06	1.889e-06	4.95	40.87	Used	Used	R.IASHGKGILQPHEVLSEFEAVADKHK.L	[33-58]
	FALSE	High	[R].LDETLTAQR.[N]		0.000110367	5.33751e-05	1	1	24	1108966238	1108966238 [15-23]		0	1046.55	19.6	75.8	32.9	85.7	43.5	172.7	154.3	91.3	120.1	204.1		Peak Found	High	High	High	High	High	High	High	High	High	High	7.23e-06	1.299e-05	1.49	10.57	Used	Used	R.LDETLTAQR.N	[15-23]
	FALSE	High	[R].IEEKYTWK.[I]		0.033204	0.00195327	1	2	4	1108966238	1108966238 [744-751]		1	1096.57	35.3	42.1	26.2	288.3	196.3	99.4	53	88.8	80.2	90.3		Peak Found	Peak Found	Peak Found	High	Peak Found	High	Peak Found	Peak Found	High	Peak Found	High	0.0002842	0.003416	2.29	9.21	Used	Used	R.IEEKYTWK.I	[744-751]
	FALSE	High	[R].LEKVFGTEHSHILR.[V]		1.05236e-07	5.33751e-05	1	2	16	1108966238	1108966238 [348-361]		1	1665.91	96.6	148.8	6.7	127.4	39	159.5	122.7	67.6	87.2	144.5		High	Peak Found	Peak Found	High	High	High	High	Peak Found	High	High	High	7.23e-06	1.446e-08	5.29	11.74	Used	Used	R.LEKVFGTEHSHILR.V	[348-361]
	FALSE	High	[K].LGVTQCTIAHALEK.[T]	1xCarbamidomethyl [C6]	9.28225e-08	5.33751e-05	1	2	73	1108966238	1108966238 [424-437]		0	1540.82	13.3	132.5	81.9	89.2	149.4	142.6	91.8	75.2	106.5	117.6		High	High	High	High	High	High	High	High	High	High	High	7.23e-06	1.277e-08	4.35	24.6	Used	Used	K.LGVTQCTIAHALEK.T	[424-437]
	FALSE	High	[R].IKQQGLDIVPR.[I]		2.12888e-05	5.33751e-05	1	2	142	1108966238	1108966238 [318-328]		1	1266.75	116.5	122.1	147.7	67.8	59	85.2	103.4	75.9	93.5	128.7		High	High	High	High	High	High	High	High	High	High	High	7.23e-06	2.563e-06	3.49	9.96	Used	Used	R.IKQQGLDIVPR.I	[318-328]
	FALSE	High	[R].IKQQGLDIVPR.[I]	1xGG [K2]	0.00913333	0.000621929	1	2	2	1108966238	1108966238 [318-328]		1	1380.8		73.8	926.2									Not Found	Peak Found	High	Not Found	Not Found	Not Found	Not Found	Not Found	Not Found	Not Found	High	9.099e-05	0.0009323	1.57	12.73	Used	Used	R.IKQQGLDIVPR.I	[318-328]
	FALSE	High	[R].ILIVSR.[L]		0.112667	0.00557496	2	3	35	1108966238; 731346220	1108966238 [329-334]; 731346220 [333-338]		0	700.472	29.1	48.6	92.4	76.5	69.7	122.2	130.8	76.9	151.5	202.4	Shared	High	High	High	High	High	High	High	High	High	High	High	0.0007985	0.01255	1.41	12.55	Used	Used	R.ILIVSR.L	[329-334]
	FALSE	High	[R].LLPDAVGTTCGQR.[L]	1xCarbamidomethyl [C10]	3.07886e-05	5.33751e-05	1	2	43	1108966238	1108966238 [335-347]		0	1387.7	12.2	72.3	43	29.8	70.9	164.8	178.3	83.1	135.7	209.9		High	High	High	High	High	High	High	High	High	High	High	7.23e-06	3.685e-06	1.67	12.67	Used	Used	R.LLPDAVGTTCGQR.L	[335-347]
	FALSE	High	[R].LLPDAVGTTCGQRLEK.[V]	1xCarbamidomethyl [C10]	1.32156e-07	5.33751e-05	1	2	59	1108966238	1108966238 [335-350]		1	1757.92	69.5	186.1	27.9	63.4	158.6	62.9	99.5	98	114.1	120		High	High	High	High	High	High	High	High	High	High	High	7.23e-06	1.801e-08	4.44	15.43	Used	Used	R.LLPDAVGTTCGQRLEK.V	[335-350]
	FALSE	High	[RK].LLTLAGVYGFWK.[Y]		2.29042e-05	5.33751e-05	2	3	35	1108966238; 731348913	1108966238 [757-768]; 731348913 [747-758]		0	1367.77	14.9	14.2	7	50.1	19.9	33.1	100.2	509.4	128.1	123.1	Shared	Peak Found	Peak Found	Peak Found	High	High	High	High	High	High	High	High	7.23e-06	2.749e-06	1.47	71.31	Used	Used	R.LLTLAGVYGFWK.Y	[757-768]
	FALSE	High	[R].IQNLDSLQAVLR.[K]		6.33276e-06	5.33751e-05	1	2	125	1108966238	1108966238 [195-206]		0	1369.78	74	139.3	122.7	71.1	96.4	131.9	22.5	114.3	109.9	117.9		High	High	High	High	High	High	High	High	High	High	High	7.23e-06	7.849e-07	3.07	44.23	Used	Used	R.IQNLDSLQAVLR.K	[195-206]
	FALSE	High	[R].IQNLDSLQAVLRK.[A]		6.94733e-06	5.33751e-05	1	2	7	1108966238	1108966238 [195-207]		1	1497.87	114.9	112.8	368.5	2.3	116.4	91.7	36.3	80.6	31.3	45.2		High	High	High	Peak Found	High	High	Peak Found	Peak Found	Peak Found	Peak Found	High	7.23e-06	8.568e-07	4.28	22.35	Used	Used	R.IQNLDSLQAVLRK.A	[195-207]
	FALSE	High	[KR].LRELVNLVVVAGDR.[RS]		1.88644e-06	5.33751e-05	2	3	57	1108966238; 731348913	1108966238 [595-608]; 731348913 [585-598]		1	1552.92	125.7	92.3	150.5	160.1	17.1	172.3	101.1	100.4	37.9	42.7	Shared	High	High	High	High	High	High	High	High	High	High	High	7.23e-06	2.407e-07	4.28	39.02	Used	Used	K.LRELVNLVVVAGDR.R	[595-608]
	FALSE	High	[K].LRELVNLVVVAGDRR.[K]		5.85846e-08	5.33751e-05	1	2	33	1108966238	1108966238 [595-609]		2	1709.02	90.4	100.8	165.6	252.8	2.8	74	92.1	78.2	52.3	90.9		High	High	High	High	Peak Found	High	High	High	High	High	High	7.23e-06	8.143e-09	4.74	107.62	Used	Used	K.LRELVNLVVVAGDRR.K	[595-609]
	FALSE	High	[R].LTALHPEIEELLFSETQNEEHICVLK.[D]	1xCarbamidomethyl [C23]	3.16627e-10	5.33751e-05	1	2	33	1108966238	1108966238 [538-563]		0	3092.56	7.3	43.3	308.9	115.6	4.3	112.9	103.8	145.7	80.6	77.7		High	High	High	High	Peak Found	High	High	High	High	High	High	7.23e-06	5.031e-11	7.75	108.57	Used	Used	R.LTALHPEIEELLFSETQNEEHICVLK.D	[538-563]
	FALSE	High	[R].LTALHPEIEELLFSETQNEEHICVLKDR.[K]	1xCarbamidomethyl [C23]	2.76288e-09	5.33751e-05	1	2	102	1108966238	1108966238 [538-565]		1	3363.69	26.6	76	191.7	127.3	90.7	93.6	68.9	150.9	106.8	67.5		High	High	High	High	High	High	High	High	High	High	High	7.23e-06	4.161e-10	8.03	58.25	Used	Used	R.LTALHPEIEELLFSETQNEEHICVLKDR.K	[538-565]
	FALSE	High	[R].LTRVPSLK.[E]		0.00309449	0.000222105	1	1	6	1108966238	1108966238 [5-12]		1	913.583	64.8	58.9	109.5	42.5	127	141.8	151	66.4	180.9	57.2		Peak Found	High	Peak Found	High	Peak Found	High	High	Peak Found	High	Peak Found	High	3.769e-05	0.0003115	2.46	9.55	Used	Used	R.LTRVPSLK.E	[5-12]
	FALSE	High	[R].LTRVPSLKER.[L]		3.80284e-06	5.33751e-05	1	1	31	1108966238	1108966238 [5-14]		2	1198.73	200.2	29.3	93.2	161.3	114.9	83.5	99.7	82.5	112.7	22.7		High	High	High	High	High	High	High	High	High	High	High	7.23e-06	4.764e-07	4.45	9.21	Used	Used	R.LTRVPSLKER.L	[5-14]
	FALSE	High	[K].IYSDRLLTLAGVYGFWK.[Y]		0.001632	0.000154279	1	2	3	1108966238	1108966238 [752-768]		1	2002.08				343.8	49.5			264.8	179.1	162.8		Not Found	Not Found	Not Found	High	Peak Found	Not Found	Not Found	Peak Found	High	High	High	2.424e-05	0.0001682	1.45	72.81	Used	Used	K.IYSDRLLTLAGVYGFWK.Y	[752-768]
	FALSE	High	[-K].MFHDKESMRPLLDFLR.[M]		8.75575e-06	5.33751e-05	1	2	221	1108966238	1108966238 [165-180]		1	2035.03	148.4	83.6	17.3	180.9	165.9	28	158.3	60.4	108.1	49		High	High	High	High	High	High	High	High	High	High	High	7.23e-06	1.075e-06	2.84	100.35	Used	Used	K.MFHDKESMRPLLDFLR.M	[165-180]
	FALSE	High	[-K].MFHDKESMRPLLDFLR.[M]	1xOxidation [M]	0.000156793	9.51359e-05	1	2	68	1108966238	1108966238 [165-180]		1	2051.02	14.9	30.2	176.7	113.5	209.6	93	132.7	4.7	60.1	164.8		High	High	High	High	High	High	High	Peak Found	High	High	High	1.696e-05	1.831e-05	2.42	98.95	Used	Used	K.MFHDKESMRPLLDFLR.M	[165-180]
	FALSE	High	[-K].MFHDKESMRPLLDFLR.[M]	2xOxidation [M1; M8]	0.00536699	0.00046303	1	2	17	1108966238	1108966238 [165-180]		1	2067.02		1.6	12.1	37.7	193.1	89.8	15.7			649.9		Not Found	Peak Found	Peak Found	High	High	High	Peak Found	Not Found	Not Found	High	High	6.022e-05	0.0005423	3.29	34.5	Used	Used	K.MFHDKESMRPLLDFLR.M	[165-180]
	FALSE	High	[K].MYGLIEEYNLNGQFR.[W]		7.20975e-07	5.33751e-05	1	2	80	1108966238	1108966238 [624-638]		0	1846.88	44.5	64.6	60.4	147.8	59.4	136.2	62.5	248.3	85.9	90.4		High	High	High	High	High	High	High	High	High	High	High	7.23e-06	9.432e-08	3.57	56.05	Used	Used	K.MYGLIEEYNLNGQFR.W	[624-638]
	FALSE	High	[K].MYGLIEEYNLNGQFR.[W]	1xOxidation [M1]	2.53937e-06	5.33751e-05	1	2	9	1108966238	1108966238 [624-638]		0	1862.87			20.5	80.1	126.2	18.6		123.3	61.9	569.4		Not Found	Not Found	High	Peak Found	High	High	Not Found	High	Peak Found	High	High	7.23e-06	3.212e-07	2.66	49.38	Used	Used	K.MYGLIEEYNLNGQFR.W	[624-638]
	FALSE	High	[K].NMTGLVEWYGK.[N]		2.53226e-05	5.33751e-05	1	2	149	1108966238	1108966238 [581-591]		0	1297.62	59.7	65.9	103	81.1	173.8	136.7	64.2	119.1	102.2	94.3		High	High	High	High	High	High	High	High	High	High	High	7.23e-06	3.031e-06	1.9	42.85	Used	Used	K.NMTGLVEWYGK.N	[581-591]
	FALSE	High	[K].NMTGLVEWYGK.[N]	1xOxidation [M2]	5.63319e-05	5.33751e-05	1	2	12	1108966238	1108966238 [581-591]		0	1313.62	4.2	10.7	26.5	24.3	355.8	98.1	63.2	100.6	45.2	271.5		Peak Found	High	Peak Found	Peak Found	High	High	High	High	High	High	High	7.23e-06	6.652e-06	2	23.85	Used	Used	K.NMTGLVEWYGK.N	[581-591]
	FALSE	High	[K].NMTGLVEWYGKNK.[K]		4.65641e-05	5.33751e-05	1	2	6	1108966238	1108966238 [581-593]		1	1539.76	153.5	194.3		318.2	34.8	75.6	35.8	69.5	44.8	73.6		High	High	Not Found	High	Peak Found	Peak Found	High	Peak Found	Peak Found	Peak Found	High	7.23e-06	5.527e-06	2.71	32.5	Used	Used	K.NMTGLVEWYGKNK.K	[581-593]
	FALSE	High	[K].NMTGLVEWYGKNKK.[L]		0.00304619	0.000222105	1	2	1	1108966238	1108966238 [581-594]		2	1667.86	292.7	300.4		24.9		100	53.2	112.4	44.6	71.9		High	Peak Found	Not Found	Peak Found	Not Found	Peak Found	Peak Found	Peak Found	Peak Found	Peak Found	High	3.769e-05	0.0003064	2.14	23.41	Used	Used	K.NMTGLVEWYGKNKK.L	[581-594]
	FALSE	High	[K].QQGLDIVPR.[I]		0.00138388	0.000154279	1	2	24	1108966238	1108966238 [320-328]		0	1025.57	133.7	68	10.4	60.7	49.8	167	155.2	79.6	153.7	121.9		Peak Found	High	Peak Found	High	High	High	High	High	High	High	High	2.424e-05	0.0001437	1.98	16.32	Used	Used	K.QQGLDIVPR.I	[320-328]
	FALSE	High	[R].RYLEMFYALK.[Y]		0.000121665	9.51359e-05	1	2	115	1108966238	1108966238 [780-789]		1	1333.7	24.4	36.2	148.9	60.3	38.3	124.5	170.5	174	106.1	116.9		High	High	High	High	High	High	High	High	High	High	High	1.364e-05	1.43e-05	2.74	108.63	Used	Used	R.RYLEMFYALK.Y	[780-789]
	FALSE	High	[R].RYLEMFYALK.[Y]	1xOxidation [M5]	0.0038628	0.000400026	1	2	16	1108966238	1108966238 [780-789]		1	1349.69			7.6		71.4	163.7	119.6	34	35.3	568.4		Not Found	Not Found	Peak Found	Not Found	High	High	High	High	High	High	High	5.451e-05	0.0003876	2.41	32.19	Used	Used	R.RYLEMFYALK.Y	[780-789]
	FALSE	High	[K].SGFHIDPYHGDK.[A]		3.10689e-05	5.33751e-05	1	2	34	1108966238	1108966238 [703-714]		0	1372.63	51.4	22.1	96.3	191	217	109.7	129.1	37	69.5	76.9		High	High	High	High	High	High	High	High	High	High	High	7.23e-06	3.716e-06	2.76	11.42	Used	Used	K.SGFHIDPYHGDK.A	[703-714]
	FALSE	High	[K].SGFHIDPYHGDKAADLLVDFFEK.[S]		1.16371e-09	5.33751e-05	1	2	255	1108966238	1108966238 [703-725]		1	2621.27	166	52.2	80.9	111.1	146.3	64.7	194.9	35.2	98.3	50.4		High	High	High	High	High	High	High	High	High	High	High	7.23e-06	1.791e-10	6.4	101.17	Used	Used	K.SGFHIDPYHGDKAADLLVDFFEK.S	[703-725]
	FALSE	High	[K].SGFHIDPYHGDKAADLLVDFFEKSTADPSYWENISK.[G]		9.76925e-08	5.33751e-05	1	2	27	1108966238	1108966238 [703-738]		2	4099.93	286.4	51.4	39.7	95.1	319.4	5.3	63.2	4.7	108.1	26.7		High	High	High	High	High	Peak Found	High	High	High	Peak Found	High	7.23e-06	1.345e-08	7.3	97.97	Used	Used	K.SGFHIDPYHGDKAADLLVDFFEKSTADPSYWENISK.G	[703-738]
	FALSE	High	[K].SIGNGVEFLNR.[H]		5.48625e-05	5.33751e-05	1	1	75	1108966238	1108966238 [149-159]		0	1205.63	102.6	64.7	65.4	62.5	85.3	83.6	153.8	104.6	117.8	159.7		High	High	High	High	High	High	High	High	High	High	High	7.23e-06	6.476e-06	2.16	21.25	Used	Used	K.SIGNGVEFLNR.H	[149-159]
	FALSE	High	[K].SIGNGVEFLNRHLSAK.[M]		0.000104218	5.33751e-05	1	1	5	1108966238	1108966238 [149-164]		1	1741.93	199.8	156.2	43.7	196.1	92.8	38.9	40.3	18.3	112.8	101		High	High	Peak Found	High	Peak Found	Peak Found	Peak Found	Peak Found	Peak Found	Peak Found	High	7.23e-06	1.226e-05	1.99	24.06	Used	Used	K.SIGNGVEFLNRHLSAK.M	[149-164]
	FALSE	High	[K].STADPSYWENISK.[G]		3.3863e-06	5.33751e-05	1	2	60	1108966238	1108966238 [726-738]		0	1497.69	36.2	64	165.5	79.5	47.8	129.7	124.1	131	102.6	119.8		High	High	High	High	High	High	High	High	High	High	High	7.23e-06	4.255e-07	2.23	20.35	Used	Used	K.STADPSYWENISK.G	[726-738]
	FALSE	High	[K].STADPSYWENISKGGLQR.[I]		1.20423e-07	5.33751e-05	1	2	27	1108966238	1108966238 [726-743]		1	2008.97	273.7	195.6	36.6	86.9	174	8	36.6	75	73.3	40.4		High	High	High	High	High	Peak Found	High	High	High	High	High	7.23e-06	1.649e-08	3.69	32.13	Used	Used	K.STADPSYWENISKGGLQR.I	[726-743]
	FALSE	High	[K].TKYPNSDIYWK.[S]		0.000172047	9.51359e-05	1	2	191	1108966238	1108966238 [438-448]		1	1414.7	56.4	82.5	188.1	119.8	101.6	123.5	97.5	56.9	104.2	69.4		High	High	High	High	High	High	High	High	High	High	High	1.696e-05	1.998e-05	1.72	14.87	Used	Used	K.TKYPNSDIYWK.S	[438-448]
	FALSE	High	[K].TIMLNDR.[I]		0.0159017	0.000968112	1	2	34	1108966238	1108966238 [188-194]		0	862.445	12.9	41	251.6	13	59	145.7	175.3	67.2	146.5	87.9		High	High	High	High	High	High	High	High	High	High	High	0.0001477	0.001634	1.65	11.17	Used	Used	K.TIMLNDR.I	[188-194]
	FALSE	High	[K].TIMLNDRIQNLDSLQAVLR.[K]		1.54067e-07	5.33751e-05	1	2	65	1108966238	1108966238 [188-206]		1	2213.21	493.4	89.6	56.2	76.9	34.4	29.7	47.6	76.2	57.6	38.3		High	High	High	High	High	High	High	High	High	High	High	7.23e-06	2.091e-08	3.97	59.39	Used	Used	K.TIMLNDRIQNLDSLQAVLR.K	[188-206]
	FALSE	High	[K].TIMLNDRIQNLDSLQAVLR.[K]	1xOxidation [M3]	0.000165232	9.51359e-05	1	2	6	1108966238	1108966238 [188-206]		1	2229.2		457.1		134.9	11.2					396.9		High	High	Not Found	High	Peak Found	Not Found	Not Found	Not Found	Not Found	High	High	1.696e-05	1.923e-05	3.3	53.66	Used	Used	K.TIMLNDRIQNLDSLQAVLR.K	[188-206]
	FALSE	High	[K].TIMLNDRIQNLDSLQAVLRK.[A]		8.31683e-05	5.33751e-05	1	2	2	1108966238	1108966238 [188-207]		2	2341.3	1000											High	Not Found	Not Found	Not Found	Not Found	Not Found	Not Found	Not Found	Not Found	Not Found	High	7.23e-06	9.772e-06	3.04	51.5	Used	Used	K.TIMLNDRIQNLDSLQAVLRK.A	[188-207]
	FALSE	High	[K].VFGTEHSHILR.[V]		5.33503e-06	5.33751e-05	1	2	86	1108966238	1108966238 [351-361]		0	1295.69	39	46.3	101.4	31.6	264.3	203.2	93	66.4	68.3	86.6		High	High	High	High	High	High	High	High	High	High	High	7.23e-06	6.617e-07	3.31	10.26	Used	Used	K.VFGTEHSHILR.V	[351-361]
	FALSE	High	[K].VFGTEHSHILRVPFRTEK.[G]		0.00106675	0.000154279	1	2	10	1108966238	1108966238 [351-368]		2	2153.16	584.6	201.1	2.1	8.9	26.2	4.9	7.2	29.8	31.8	103.3		High	High	Peak Found	Peak Found	Peak Found	Peak Found	Peak Found	Peak Found	Peak Found	High	High	2.424e-05	0.0001127	3.69	18.83	Used	Used	K.VFGTEHSHILRVPFRTEK.G	[351-368]
	FALSE	High	[R].VKNMTGLVEWYGK.[N]		1.01044e-05	5.33751e-05	1	2	46	1108966238	1108966238 [579-591]		1	1524.79	110.8	107.6	61.7	218.8	121.9	63.1	52.4	103.6	102.8	57.4		High	High	High	High	High	High	High	High	High	High	High	7.23e-06	1.236e-06	1.79	32.09	Used	Used	R.VKNMTGLVEWYGK.N	[579-591]
	FALSE	High	[R].VKNMTGLVEWYGK.[N]	1xGG [K/T]	0.0185534	0.001191	1	2	3	1108966238	1108966238 [579-591]		1	1638.83		60.1	275.2	32.5	31.8	202.1	82.4	88.2	145.5	82.1		Not Found	High	High	Peak Found	Peak Found	Peak Found	Peak Found	Peak Found	Peak Found	Peak Found	High	0.0001805	0.001918	1.07	25.75	Used	Used	R.VKNMTGLVEWYGK.N	[579-591]
	FALSE	High	[R].VMDMIQLLLDLLEAPDSCTLEK.[F]	1xCarbamidomethyl [C18]	3.54603e-08	5.33751e-05	1	2	28	1108966238	1108966238 [244-265]		0	2547.28		11.5	135.3	42.5	481.3	101.4	49.4	67.6	64.8	46.2		Not Found	High	High	High	High	High	High	High	High	High	High	7.23e-06	4.991e-09	4.12	111.27	Used	Used	R.VMDMIQLLLDLLEAPDSCTLEK.F	[244-265]
	FALSE	High	[R].VNVDALAVEELTPSQFLHVK.[E]		4.83421e-07	5.33751e-05	1	1	20	1108966238	1108966238 [97-116]		0	2209.19	38.4	72.9	175.8	81.1	41.6	144.9	111.9	173.8	91.7	68		High	High	High	High	High	High	High	High	High	High	High	7.23e-06	6.376e-08	4.45	63.94	Used	Used	R.VNVDALAVEELTPSQFLHVK.E	[97-116]
	FALSE	High	[R].VPSLKERLDETLTAQR.[N]	1xPhospho [S3]	0.000337309	0.000126394	1	1	5	1108966238	1108966238 [8-23]	1108966238 1xPhospho [S10]	2	1935.99	128.1	123.9	221.2	34	65.4	102.4	34	155.9	92.4	42.8		Peak Found	Peak Found	High	Peak Found	Peak Found	High	Peak Found	High	High	High	High	1.859e-05	3.781e-05	3.42	32.39	Used	Used	R.VPSLKERLDETLTAQR.N	[8-23]
	FALSE	High	[R].VVHGIDVFDPK.[F]		0.000104218	5.33751e-05	2	3	95	1108966238; 731346220	1108966238 [505-515]; 731346220 [509-519]		0	1225.66	57	74.5	127.3	108.8	15	138.3	117	114.2	106.5	141.5	Shared	High	High	High	High	High	High	High	High	High	High	High	7.23e-06	1.227e-05	2.81	23.13	Used	Used	R.VVHGIDVFDPK.F	[505-515]
	FALSE	High	[R].VVHGIDVFDPKFNIVSPGADLSIYFNYTEEK.[K]		2.90254e-05	5.33751e-05	1	2	4	1108966238	1108966238 [505-535]		1	3513.76	650.2	26.1	257.2	19.4		10.8			23.7	12.5		High	High	High	Peak Found	Not Found	Peak Found	Not Found	Not Found	Peak Found	Peak Found	High	7.23e-06	3.475e-06	4.62	83.2	Used	Used	R.VVHGIDVFDPKFNIVSPGADLSIYFNYTEEK.K	[505-535]
	FALSE	High	[R].WISAQMNR.[V]		0.000930443	0.000154279	1	2	41	1108966238	1108966238 [639-646]		0	1005.49	61.6	89.9	97.8	66.6	100.9	90.1	131.4	92.1	145.3	124.5		High	High	High	High	High	High	High	High	High	High	High	2.424e-05	9.883e-05	1.86	12.51	Used	Used	R.WISAQMNR.V	[639-646]
	FALSE	High	[R].WISAQMNR.[V]	1xOxidation [M6]	0.0187137	0.001191	1	2	2	1108966238	1108966238 [639-646]		0	1021.49	6.3				52.4	124	133.5	32.4	92.4	559.1		Peak Found	Not Found	Not Found	Not Found	Peak Found	Peak Found	Peak Found	Peak Found	Peak Found	High	High	0.0001805	0.001929	2.19	10.71	Used	Used	R.WISAQMNR.V	[639-646]
	FALSE	High	[R].YLEMFYALK.[Y]		0.000329694	0.000126394	1	2	35	1108966238	1108966238 [781-789]		0	1177.6	48.9	72.7	20.4	139.4	59.3	174	132.8	163.2	96.7	92.7		High	High	High	High	High	High	High	High	High	High	High	1.859e-05	3.697e-05	1.8	55.38	Used	Used	R.YLEMFYALK.Y	[781-789]
	FALSE	High	[R].YLEMFYALK.[Y]	1xOxidation [M4]	0.000622935	0.000126394	1	2	5	1108966238	1108966238 [781-789]		0	1193.59			47.7	56.6	250.9	227.4	10.6	238	94.2	74.6		Not Found	Not Found	High	Peak Found	Peak Found	High	Peak Found	High	High	High	High	1.859e-05	6.739e-05	2.12	50.18	Used	Used	R.YLEMFYALK.Y	[781-789]
	FALSE	High	[R].YLEMFYALKYK.[K]		0.0281309	0.00174065	1	2	3	1108966238	1108966238 [781-791]		1	1468.75		16.7	53.6	37.1	97.7	146.3	116.8	211.2	198.2	122.4		Not Found	Peak Found	Peak Found	Peak Found	Peak Found	Peak Found	Peak Found	High	Peak Found	Peak Found	High	0.0002513	0.002895	1.46	43.87	Used	Used	R.YLEMFYALKYK.K	[781-791]
FALSE		High	Master Protein	6432377164112063413	4052	731330156	PREDICTED: heat shock cognate protein 80 [Beta vulgaris subsp. vulgaris]	MAEAETFAFQAEINQLLSLIINTFYSNKEIFLRELISNSSDALDKIRFEGLTDKSKLEAQPELFIHIVPDKTNNSLTIIDSGIGMTKADLVNNLGTIARSGTKEFMEALAAGADVSMIGQFGVGFYSAYLVAEKVIVTTKHNDDEQYVWESQAGGSFTVTRDTTGEPLGRGTKMTLYLKEDQLEYLEERRLKDLIKKHSEFISYPISLWVEKTIEKEISDDEEEEEKKDEEGKVEDVDEEKEKEEKKKKKIKEVSNEWSLVNKQKPIWMRKPEEITKEEYAAFYKSLTNDWEEHLQVKHFSVEGQLEFKAVLFVPKRAPFDLFDTKKKPNNIKLYVRRVFIMDNCEELIPEYLSFVKGIVDSEDLPLNISRETLQQNKILKVIRKNLVKKCVELFFEIA…	>gi|731330156|ref|XP_010675973.1| PREDICTED: heat shock cognate protein 80 [Beta vulgaris subsp. vulgaris]	0	888.655	75	71	2605	59	60	698	80	5.06	6278.62	75	2605	71	13	143.6	114.1	78.6	103.2	105.6	94.5	91.9	85.3	92.4	90.7	1.97162e+09	3.18297e+09	1.35638e+09	1.46474e+09	5.74408e+08	2.16993e+09	1.08237e+09	1.41407e+09	1.87908e+09	1.77661e+09	4.00686e+09	3.18297e+09	2.19362e+09	2.88014e+09	2.94687e+09
	Checked	Confidence	Annotated Sequence	Modifications	Qvality PEP	Qvality q-value	# Protein Groups	# Proteins	# PSMs	Master Protein Accessions	Positions in Master Proteins	Modifications in Master Proteins	# Missed Cleavages	Theo. MH+ [Da]	Abundances (Scaled): F1: Control	Abundances (Scaled): F2: Control	Abundances (Scaled): F3: Control	Abundances (Scaled): F4: Control	Abundances (Scaled): F5: Control	Abundances (Scaled): F6: Sample	Abundances (Scaled): F7: Sample	Abundances (Scaled): F8: Sample	Abundances (Scaled): F9: Sample	Abundances (Scaled): F10: Sample	Quan Info	Found in Sample: [S1] F1: Control	Found in Sample: [S2] F2: Control	Found in Sample: [S3] F3: Control	Found in Sample: [S4] F4: Control	Found in Sample: [S5] F5: Control	Found in Sample: [S6] F6: Sample	Found in Sample: [S7] F7: Sample	Found in Sample: [S8] F8: Sample	Found in Sample: [S9] F9: Sample	Found in Sample: [S10] F10: Sample	Confidence (by Search Engine): Sequest HT	Percolator q-Value (by Search Engine): Sequest HT	Percolator PEP (by Search Engine): Sequest HT	XCorr (by Search Engine): Sequest HT	Top Apex RT [min]	Quan Usage	Quan Ratio Usage	Sequence in Protein	Positions in Proteins
	FALSE	High	[K].ADLVNNLGTIAR.[S]		6.75697e-06	5.33751e-05	2	2	84	731321951; 731330156	731321951 [93-104]; 731330156 [88-99]		0	1256.7	91.5	160.1	36.6	43.6	48.7	127.1	130.6	124.5	80.3	156.8	Shared	High	High	High	High	High	High	High	High	High	High	High	7.23e-06	8.335e-07	3.82	29.28	Used	Used	K.ADLVNNLGTIAR.S	[88-99]
	FALSE	High	[R].APFDLFDTK.[K]		8.97361e-05	5.33751e-05	1	1	11	731330156	731330156 [318-326]		0	1053.53	14	105	253.9	64.9	111.6	138.9	42.9	74.3	73.1	121.5		Peak Found	High	High	High	High	High	High	Peak Found	High	High	High	7.23e-06	1.056e-05	2.35	46.49	Used	Used	R.APFDLFDTK.K	[318-326]
	FALSE	High	[K].AQALRDSSMAGYMSSK.[K]		4.30387e-07	5.33751e-05	1	1	28	731330156	731330156 [587-602]		1	1702.79	190.9	128.6	46.3	120.4	152.3	24.4	116.4	90.6	70.3	59.6		High	High	Peak Found	High	High	Peak Found	High	High	High	High	High	7.23e-06	5.69e-08	4.44	13.1	Used	Used	K.AQALRDSSMAGYMSSK.K	[587-602]
	FALSE	High	[K].AQALRDSSMAGYMSSKK.[T]		4.07671e-08	5.33751e-05	1	1	19	731330156	731330156 [587-603]		2	1830.88	360.6	99.4	2.1	195.8	26.1	4.2	67.4	101.3	83.1	60		High	High	Peak Found	High	High	Peak Found	High	High	High	High	High	7.23e-06	5.723e-09	5.39	10.24	Used	Used	K.AQALRDSSMAGYMSSKK.T	[587-603]
	FALSE	High	[K].AVENSPFLER.[L]		0.000211855	9.51359e-05	2	2	32	731321951; 731330156	731321951 [477-486]; 731330156 [472-481]		0	1161.59	235.4	81.5	0.4	51	110.8	107.1	105.2	56.4	116.2	135.9	Shared	High	High	Peak Found	High	High	High	High	High	High	High	High	1.696e-05	2.428e-05	2.53	20.34	Used	Used	K.AVENSPFLER.L	[472-481]
	FALSE	High	[K].AVLFVPK.[R]		0.0108765	0.000853352	1	1	33	731330156	731330156 [310-316]		0	773.492	48.4	48.4	11	50.3	123.8	149.7	109.6	80.1	142.3	236.3		High	High	High	High	High	High	High	High	High	High	High	0.0001191	0.001116	1.62	17.53	Used	Used	K.AVLFVPK.R	[310-316]
	FALSE	High	[K].CVELFFEIAENKDDYNKFYEAFSK.[N]	1xCarbamidomethyl [C1]	5.20743e-07	5.33751e-05	1	1	8	731330156	731330156 [391-414]		2	3006.39		516.2	171.2	39.3		40.4	24.6	129.6	64.9	14		Not Found	High	High	Peak Found	Not Found	Peak Found	Peak Found	High	Peak Found	Peak Found	High	7.23e-06	6.849e-08	6.04	110.25	Used	Used	K.CVELFFEIAENKDDYNKFYEAFSK.N	[391-414]
	FALSE	High	[K].DLVLLLHETALLTSGFSLDDPNTFGNR.[I]		1.62115e-10	5.33751e-05	1	1	40	731330156	731330156 [632-658]		0	2958.52	130	52.9	81.6	91.6	77.7	39.9	89.4	248	134	54.7		High	High	High	High	High	High	High	High	High	High	High	7.23e-06	2.621e-11	3.97	104.41	Used	Used	K.DLVLLLHETALLTSGFSLDDPNTFGNR.I	[632-658]
	FALSE	High	[K].DLVLLLHETALLTSGFSLDDPNTFGNRIHR.[M]		8.82389e-05	5.33751e-05	1	1	2	731330156	731330156 [632-661]		1	3364.76	743.1	38.7		18	139.8		37.3	23.2				High	Peak Found	Not Found	Peak Found	Peak Found	Not Found	Peak Found	Peak Found	Not Found	Not Found	High	7.23e-06	1.039e-05	3.1	100.67	Used	Used	K.DLVLLLHETALLTSGFSLDDPNTFGNRIHR.M	[632-661]
	FALSE	High	[R].DSSMAGYMSSK.[K]		4.53352e-05	5.33751e-05	1	1	29	731330156	731330156 [592-602]		0	1163.47	138.7	156.8	22.9	29.6	42.4	98.1	176.1	87.8	145.1	102.4		High	High	High	High	High	High	High	High	High	High	High	7.23e-06	5.38e-06	1.82	13.96	Used	Used	R.DSSMAGYMSSK.K	[592-602]
	FALSE	High	[R].DSSMAGYMSSKK.[T]		6.42418e-05	5.33751e-05	1	1	18	731330156	731330156 [592-603]		1	1291.57	140.1	53.7	4.9	66.4	49.2	68.4	209.9	77.9	222.9	106.6		High	High	Peak Found	High	Peak Found	Peak Found	High	High	High	High	High	7.23e-06	7.572e-06	1.8	10.3	Used	Used	R.DSSMAGYMSSKK.T	[592-603]
	FALSE	High	[R].DSSMAGYMSSKK.[T]	1xGG [K11]	0.000111271	5.33751e-05	1	1	3	731330156	731330156 [592-603]		1	1405.61	2.6	110	600.7			27.4	173.2	17.5	38.3	30.4		Peak Found	High	High	Not Found	Not Found	Peak Found	Peak Found	Peak Found	Peak Found	Peak Found	High	7.23e-06	1.305e-05	2.45	10.37	Used	Used	R.DSSMAGYMSSKK.T	[592-603]
	FALSE	High	[R].DTTGEPLGR.[G]		0.00460552	0.000431659	1	1	2	731330156	731330156 [162-170]		0	945.464	291.5	98.4	73.6	51.8	48.2	43.1	103.1	108.9	71.3	110.1		High	Peak Found	Peak Found	Peak Found	Peak Found	Peak Found	High	Peak Found	Peak Found	Peak Found	High	5.722e-05	0.0004622	2.21	10.44	Used	Used	R.DTTGEPLGR.G	[162-170]
	FALSE	High	[K].EGQNDIFYITGETK.[K]		2.39741e-05	5.33751e-05	1	1	11	731330156	731330156 [457-470]		0	1614.76	229.7	214.8	1.1	42.5	35.6	88.6	83.1	134.3	93.6	76.7		High	High	Peak Found	Peak Found	Peak Found	High	High	High	High	High	High	7.23e-06	2.872e-06	2.35	35.15	Used	Used	K.EGQNDIFYITGETK.K	[457-470]
	FALSE	High	[R].ELISNSSDALDK.[I]		0.000202484	9.51359e-05	2	2	1	731321951; 731330156	731321951 [39-50]; 731330156 [34-45]		0	1291.64											Not Reliable	Not Found	Not Found	Not Found	Not Found	Not Found	High	Not Found	Not Found	Not Found	Not Found	High	1.696e-05	2.333e-05	2.05		Not Used	Not Used	R.ELISNSSDALDK.I	[34-45]
	FALSE	High	[R].ELISNSSDALDKIR.[F]		1.4885e-06	5.33751e-05	2	2	23	731321951; 731330156	731321951 [39-52]; 731330156 [34-47]		1	1560.82	37.9	82.5	64.5	16.5	115.9	127.7	74.1	109.4	115.8	255.6	Shared	Peak Found	High	High	Peak Found	High	High	High	High	High	High	High	7.23e-06	1.913e-07	4.4	23.32	Used	Used	R.ELISNSSDALDKIR.F	[34-47]
	FALSE	High	[R].ELISNSSDALDKIRFEGLTDK.[S]		6.04252e-07	5.33751e-05	1	1	13	731330156	731330156 [34-54]		2	2351.21	27.5	70.2	104.7	193.2	235	62.4	39.8	90.8	125.6	50.8		Peak Found	High	Peak Found	High	High	High	Peak Found	High	High	High	High	7.23e-06	7.92e-08	5.46	41.83	Used	Used	R.ELISNSSDALDKIRFEGLTDK.S	[34-54]
	FALSE	High	[K].EVSNEWSLVNK.[Q]		0.00011731	5.33751e-05	1	1	19	731330156	731330156 [253-263]		0	1304.65	97.2	152.6	25.8	59	25.9	145.4	106.8	91.7	126.9	168.7		High	High	Peak Found	High	Peak Found	High	Peak Found	High	High	High	High	7.23e-06	1.38e-05	2.38	26.09	Used	Used	K.EVSNEWSLVNK.Q	[253-263]
	FALSE	High	[K].EVSNEWSLVNKQKPIWMR.[K]		0.00392483	0.000400026	1	1	1	731330156	731330156 [253-270]		1	2244.16	911.6						88.4					High	Not Found	Not Found	Not Found	Not Found	Not Found	Peak Found	Not Found	Not Found	Not Found	High	5.451e-05	0.0003935	1.66	42	Used	Used	K.EVSNEWSLVNKQKPIWMR.K	[253-270]
	FALSE	High	[R].FEGLTDK.[S]		0.0391941	0.00222396	1	1	4	731330156	731330156 [48-54]		0	809.404	33.9	16.3		65.8		311.6	154.1	53.9	223.1	141.3		Peak Found	Peak Found	Not Found	Peak Found	Not Found	High	High	High	High	Peak Found	High	0.0003352	0.004032	1.8	10.92	Used	Used	R.FEGLTDK.S	[48-54]
	FALSE	High	[K].GIVDSEDLPLNISR.[E]		7.37925e-07	5.33751e-05	1	1	75	731330156	731330156 [358-371]		0	1527.8	161.9	231	6.1	43.3	52	129.5	38.8	83.5	153	101		High	High	High	High	High	High	High	High	High	High	High	7.23e-06	9.643e-08	3.46	42.73	Used	Used	K.GIVDSEDLPLNISR.E	[358-371]
	FALSE	High	[K].GIVDSEDLPLNISRETLQQNK.[I]		7.44688e-06	5.33751e-05	1	1	2	731330156	731330156 [358-378]		1	2369.23	353.5	479.9	54.1						112.5			High	High	Peak Found	Not Found	Not Found	Not Found	Not Found	Not Found	Peak Found	Not Found	High	7.23e-06	9.169e-07	3.27	43.59	Used	Used	K.GIVDSEDLPLNISRETLQQNK.I	[358-378]
	FALSE	High	[K].GYEVLYMVDAIDEYAVGQLK.[E]		0.000239991	9.51359e-05	2	2	4	731321951; 731330156	731321951 [491-510]; 731330156 [486-505]		0	2276.12			526.9	123.3	84.8		125.9		60.1	79	Shared	Not Found	Not Found	High	Peak Found	Peak Found	Not Found	Peak Found	High	Peak Found	High	High	1.696e-05	2.732e-05	1.88	103.59	Used	Used	K.GYEVLYMVDAIDEYAVGQLK.E	[486-505]
	FALSE	High	[K].GYEVLYMVDAIDEYAVGQLKEFEGK.[K]		7.266e-09	5.33751e-05	1	1	21	731330156	731330156 [486-510]		1	2866.39	301.4	85	67.7	17.7	199.4	24.1	39.5	144.2	52.1	68.9		High	High	High	High	High	Peak Found	High	High	High	High	High	7.23e-06	1.065e-09	4.31	109.41	Used	Used	K.GYEVLYMVDAIDEYAVGQLKEFEGK.K	[486-510]
	FALSE	High	[K].GYEVLYMVDAIDEYAVGQLKEFEGKK.[L]		1.66736e-07	5.33751e-05	1	1	8	731330156	731330156 [486-511]		2	2994.48	290.7	36.4	77.6	65.1	118.5	67.8	45.6	142.6	95.2	60.6		High	Peak Found	Peak Found	Peak Found	High	Peak Found	Peak Found	High	High	High	High	7.23e-06	2.256e-08	5.92	109.14	Used	Used	K.GYEVLYMVDAIDEYAVGQLKEFEGKK.L	[486-511]
	FALSE	High	[K].HFSVEGQLEFK.[A]		1.4885e-06	5.33751e-05	2	2	21	731321951; 731330156	731321951 [304-314]; 731330156 [299-309]		0	1320.66	66.4	133.7	21	127.4	28	210.7	129.7	112.5	94.7	75.9	Shared	High	High	High	High	Peak Found	High	High	High	High	Peak Found	High	7.23e-06	1.909e-07	3.87	25.69	Used	Used	K.HFSVEGQLEFK.A	[299-309]
	FALSE	High	[K].HNDDEQYVWESQAGGSFTVTR.[D]		2.19352e-07	5.33751e-05	1	1	6	731330156	731330156 [141-161]		0	2426.06	311.2	252.7	34.4	26.9	11.1	79.7	29.6	115.7	111	27.7		Peak Found	High	High	Peak Found	Peak Found	Peak Found	Peak Found	High	Peak Found	Peak Found	High	7.23e-06	2.953e-08	4.7	34.92	Used	Used	K.HNDDEQYVWESQAGGSFTVTR.D	[141-161]
	FALSE	High	[K].HSEFISYPISLWVEK.[T]		1.58662e-08	5.33751e-05	1	1	127	731330156	731330156 [198-212]		0	1834.94	114.8	82.5	147	70.4	44	234.9	97.3	51.6	79.8	77.6		High	High	High	High	High	High	High	High	High	High	High	7.23e-06	2.286e-09	3.57	59.93	Used	Used	K.HSEFISYPISLWVEK.T	[198-212]
	FALSE	High	[K].KAVENSPFLER.[L]		3.20285e-06	5.33751e-05	2	2	69	731321951; 731330156	731321951 [476-486]; 731330156 [471-481]		1	1289.68	82.5	131.6	139.6	98.8	91.5	77.6	95	55.7	101	126.5	Shared	High	High	Peak Found	High	High	High	High	High	High	High	High	7.23e-06	4.033e-07	3.77	12.02	Used	Used	K.KAVENSPFLER.L	[471-481]
	FALSE	High	[K].KAVENSPFLER.[L]	1xGG [K1]	0.00761808	0.000524579	2	2	2	731321951; 731330156	731321951 [476-486]; 731330156 [471-481]		1	1403.73		80.6	237	12.3		280.1		37.7	144.4	207.8	Shared	Not Found	Peak Found	High	Peak Found	Not Found	High	Not Found	Peak Found	Peak Found	Peak Found	High	7.887e-05	0.0007756	2.47	11.58	Used	Used	K.KAVENSPFLER.L	[471-481]
	FALSE	High	[K].KGYEVLYMVDAIDEYAVGQLK.[E]		2.94611e-06	5.33751e-05	2	2	3	731321951; 731330156	731321951 [490-510]; 731330156 [485-505]		1	2404.21	31.1	12.2	70.5	39.1	321.7	29.7	323.2	100.4	46.6	25.5	Shared	Peak Found	Peak Found	Peak Found	Peak Found	Peak Found	Peak Found	High	High	High	Peak Found	High	7.23e-06	3.711e-07	3.41	102.6	Used	Used	K.KGYEVLYMVDAIDEYAVGQLK.E	[485-505]
	FALSE	High	[K].KGYEVLYMVDAIDEYAVGQLKEFEGK.[K]		5.02409e-11	5.33751e-05	1	1	38	731330156	731330156 [485-510]		2	2994.48	111.6	52.9	113.1	97.8	134.9	54.5	58.8	122.1	181.2	73.2		Peak Found	High	High	High	High	High	High	High	High	High	High	7.23e-06	8.344e-12	8.84	109.14	Used	Used	K.KGYEVLYMVDAIDEYAVGQLKEFEGK.K	[485-510]
	FALSE	High	[K].KHSEFISYPISLWVEK.[T]		1.52348e-06	5.33751e-05	1	1	120	731330156	731330156 [197-212]		1	1963.03	107.8	108.2	140.2	61.2	30.5	206.7	106	37.3	64.9	137.3		High	High	High	High	High	High	High	High	High	High	High	7.23e-06	1.955e-07	3.5	48.76	Used	Used	K.KHSEFISYPISLWVEK.T	[197-212]
	FALSE	High	[RK].KKPNNIKLYVR.[R]		0.000452425	0.000126394	2	2	1	731321951; 731330156	731321951 [332-342]; 731330156 [327-337]		2	1372.84	551.1			53.9			294	101.1			Shared	High	Not Found	Not Found	Peak Found	Not Found	Not Found	Peak Found	Peak Found	Not Found	Not Found	High	1.859e-05	4.978e-05	2.88	9.2	Used	Used	K.KKPNNIKLYVR.R	[327-337]
	FALSE	High	[K].KIKEVSNEWSLVNK.[Q]		1.86416e-07	5.33751e-05	1	1	10	731330156	731330156 [250-263]		2	1673.92	404.9	100.6	8.3	43.5	142.6	39.6	32.4	97.9	39.7	90.5		High	High	Peak Found	High	High	Peak Found	High	Peak Found	High	High	High	7.23e-06	2.518e-08	3.35	97.82	Used	Used	K.KIKEVSNEWSLVNK.Q	[250-263]
	FALSE	High	[R].KPEEITKEEYAAFYK.[S]		1.12122e-09	5.33751e-05	1	1	158	731330156	731330156 [271-285]		1	1845.93	171.6	58.3	57.7	177.7	161.5	94.2	94.3	61.5	77.2	46		High	High	High	High	High	High	High	High	High	High	High	7.23e-06	1.729e-10	5.12	18.46	Used	Used	R.KPEEITKEEYAAFYK.S	[271-285]
	FALSE	High	[R].KPEEITKEEYAAFYK.[S]	1xGG [K7]	0.000719259	0.000154279	1	1	1	731330156	731330156 [271-285]		1	1959.97			392.7			315.1	292.2					Not Found	Not Found	High	Not Found	Not Found	Peak Found	Peak Found	Not Found	Not Found	Not Found	High	2.258e-05	7.763e-05	2.81	16.52	Used	Used	R.KPEEITKEEYAAFYK.S	[271-285]
	FALSE	High	[K].KTMEINPENPIMEELR.[K]		2.1364e-08	5.33751e-05	1	1	60	731330156	731330156 [603-618]		1	1943.96	140.4	188.1	133.9	76.2	108.3	68.8	49.6	79.9	108	46.6		High	High	High	High	High	High	High	High	High	High	High	7.23e-06	3.056e-09	4.06	43.08	Used	Used	K.KTMEINPENPIMEELR.K	[603-618]
	FALSE	High	[K].KTMEINPENPIMEELRK.[R]		5.47194e-09	5.33751e-05	1	1	76	731330156	731330156 [603-619]		2	2072.05	78.5	108.6	37.4	257.4	59.3	99.2	145	75.1	96.8	42.7		High	High	High	High	High	High	High	High	High	High	High	7.23e-06	8.076e-10	5.38	33.2	Used	Used	K.KTMEINPENPIMEELRK.R	[603-619]
	FALSE	High	[K].KTMEINPENPIMEELRK.[R]	1xOxidation [M3]	0.00446013	0.000431659	1	1	1	731330156	731330156 [603-619]		2	2088.05									250.5	749.5		Not Found	Not Found	Not Found	Not Found	Not Found	Not Found	Not Found	Not Found	Peak Found	High	High	5.722e-05	0.0004491	2.53	83.21	Used	Used	K.KTMEINPENPIMEELRK.R	[603-619]
	FALSE	High	[K].IAEILR.[SY]		0.076996	0.00386134	1	2	98	731330156	731330156 [430-435]		0	714.451	85.3	95.1	120.1	47.3	82.5	103.8	109.6	77.1	127.4	151.9		High	High	High	High	High	High	High	High	High	High	High	0.0005649	0.008156	1.65	13.69	Used	Used	K.LAELLR.Y	[430-435]
	FALSE	High	[K].LEAQPELFIHIVPDKTNNSLTIIDSGIGMTK.[A]		5.29588e-05	5.33751e-05	1	1	4	731330156	731330156 [57-87]		1	3394.79	166.5	217.1	402.1		56.3			119	19.6	19.3		Peak Found	High	Peak Found	Not Found	Peak Found	Not Found	Not Found	High	Peak Found	High	High	7.23e-06	6.273e-06	4.44	105.94	Used	Used	K.LEAQPELFIHIVPDKTNNSLTIIDSGIGMTK.A	[57-87]
	FALSE	High	[K].LGIHEDTQNR.[N]		2.12888e-05	5.33751e-05	1	1	12	731330156	731330156 [418-427]		0	1182.59	163.8	9.5	3.9		32.1	476.2	187.9	83.4	18.9	24.3		High	Peak Found	Peak Found	Not Found	Peak Found	High	High	High	High	High	High	7.23e-06	2.565e-06	2.91	8.66	Used	Used	K.LGIHEDTQNR.N	[418-427]
	FALSE	High	[K].LGIHEDTQNRNKLAELLR.[Y]		0.00139368	0.000154279	1	1	7	731330156	731330156 [418-435]		2	2120.16	600.3	299.9	58.9		4.5	12.2		9.6		14.6		High	High	Peak Found	High	Peak Found	Peak Found	Not Found	Peak Found	Not Found	Peak Found	High	2.424e-05	0.0001446	2.83	24.06	Used	Used	K.LGIHEDTQNRNKLAELLR.Y	[418-435]
	FALSE	High	[K].IKEVSNEWSLVNK.[Q]		4.1084e-07	5.33751e-05	1	1	82	731330156	731330156 [251-263]		1	1545.83	242.6	113.9	109.9	86.5	157.7	63.1	54.9	40.1	52.9	78.4		High	High	High	High	High	High	High	High	High	High	High	7.23e-06	5.435e-08	4.54	21.53	Used	Used	K.IKEVSNEWSLVNK.Q	[251-263]
	FALSE	High	[K].IKEVSNEWSLVNK.[Q]	1xGG [K2]	1.92488e-05	5.33751e-05	1	1	13	731330156	731330156 [251-263]		1	1659.87	3.9	68.9	364.6	19.5	15.4	178.5	78.2	37.1	91.7	142		Peak Found	Peak Found	High	High	Peak Found	High	High	High	High	Peak Found	High	7.23e-06	2.326e-06	2.08	17.66	Used	Used	K.IKEVSNEWSLVNK.Q	[251-263]
	FALSE	High	[K].IKEVSNEWSLVNKQKPIWMR.[K]		2.01318e-06	5.33751e-05	1	1	10	731330156	731330156 [251-270]		2	2485.34	666.2	80.7		51.6	24.6		89.2	20.4	53.2	14		High	High	Not Found	High	Peak Found	Not Found	High	Peak Found	High	Peak Found	High	7.23e-06	2.561e-07	3.79	36.96	Used	Used	K.IKEVSNEWSLVNKQKPIWMR.K	[251-270]
	FALSE	High	[K].IKEVSNEWSLVNKQKPIWMR.[K]	1xGG [K13]	0.000655525	0.000126394	1	1	2	731330156	731330156 [251-270]		2	2599.38		295.5						59	394.4	251.1		Not Found	High	Not Found	Not Found	Not Found	Not Found	Not Found	Peak Found	Peak Found	Peak Found	High	1.859e-05	7.088e-05	1.75	25.49	Used	Used	K.IKEVSNEWSLVNKQKPIWMR.K	[251-270]
	FALSE	High	[R].IMKAQALRDSSMAGYMSSK.[K]		5.58381e-05	5.33751e-05	1	1	9	731330156	731330156 [584-602]		2	2075.01	301.8	5.5	30.9	225.7	247	5.6	18.9	76.3	48.9	39.6		High	Peak Found	Peak Found	High	High	Peak Found	Peak Found	High	Peak Found	Peak Found	High	7.23e-06	6.61e-06	3.44	12.67	Used	Used	R.IMKAQALRDSSMAGYMSSK.K	[584-602]
	FALSE	High	[-].MAEAETFAFQAEINQLLSLIINTFYSNKEIFLR.[E]	1xMet-loss+Acetyl [N-Term]	5.88438e-11	5.33751e-05	1	1	30	731330156	731330156 [1-33]	731330156 1xMet-loss+Acetyl [N-Term]	1	3775.96	18.6	161.4	36.6	58.5	215.9	63.2	113.8	147.4	95.1	89.4		Peak Found	High	High	High	High	High	High	High	High	High	High	7.23e-06	9.763e-12	5	114.73	Used	Used	-.MAEAETFAFQAEINQLLSLIINTFYSNKEIFLR.E	[1-33]
	FALSE	High	[R].MKEGQNDIFYITGETK.[K]		5.92193e-09	5.33751e-05	1	1	113	731330156	731330156 [455-470]		1	1873.9	82.3	102.3	102.3	193	153.2	48.4	52.2	103.3	77.4	85.5		High	High	High	High	High	High	High	High	High	High	High	7.23e-06	8.732e-10	4.13	27.08	Used	Used	R.MKEGQNDIFYITGETK.K	[455-470]
	FALSE	High	[R].MKEGQNDIFYITGETK.[K]	1xOxidation [M1]	0.000326712	0.000126394	1	1	3	731330156	731330156 [455-470]		1	1889.89			207.3	47.7	544.5			30.1		170.4		Not Found	Not Found	Peak Found	Peak Found	High	Not Found	Not Found	High	Not Found	High	High	1.859e-05	3.655e-05	2.5	18.17	Used	Used	R.MKEGQNDIFYITGETK.K	[455-470]
	FALSE	High	[R].MKEGQNDIFYITGETKK.[A]		1.67513e-07	5.33751e-05	1	1	66	731330156	731330156 [455-471]		2	2001.99	309.3	75.5	61.8	168.4	141.8	42.2	44.4	49.7	49.7	57.1		High	High	High	High	High	High	High	High	High	High	High	7.23e-06	2.272e-08	2.7	19.6	Used	Used	R.MKEGQNDIFYITGETKK.A	[455-471]
	FALSE	High	[R].MKEGQNDIFYITGETKK.[A]	1xOxidation [M1]	2.28214e-06	5.33751e-05	1	1	2	731330156	731330156 [455-471]		2	2017.99	1	139.7	248.2		6.5	20	46.6			538		Peak Found	Peak Found	Peak Found	Not Found	Peak Found	Peak Found	Peak Found	Not Found	Not Found	High	High	7.23e-06	2.893e-07	3.46	12.75	Used	Used	R.MKEGQNDIFYITGETKK.A	[455-471]
	FALSE	High	[K].MTLYLK.[E]		0.114557	0.00560005	1	1	9	731330156	731330156 [174-179]		0	768.432	114.4	121.5	19.4	13.6	37.5	91.6	90.2	125.7	211.3	174.6		Peak Found	High	Peak Found	Peak Found	Peak Found	Peak Found	High	High	High	High	High	0.0008061	0.01277	1.31	16.72	Used	Used	K.MTLYLK.E	[174-179]
	FALSE	High	[K].MTLYLKEDQLEYLEER.[R]		4.1855e-07	5.33751e-05	1	1	71	731330156	731330156 [174-189]		1	2073.02	295.2	77.2	65	115.6	12.4	47	79.7	187.6	60.8	59.4		High	High	High	High	Peak Found	High	High	High	High	High	High	7.23e-06	5.551e-08	3.92	47.19	Used	Used	K.MTLYLKEDQLEYLEER.R	[174-189]
	FALSE	High	[K].MTLYLKEDQLEYLEER.[R]	1xOxidation [M1]	3.80284e-06	5.33751e-05	1	1	21	731330156	731330156 [174-189]		1	2089.02	46.3	107.6	27.7	71.4	102.3	93.8	26.8	119.1	126.2	278.7		Peak Found	High	High	High	High	High	Peak Found	High	High	High	High	7.23e-06	4.763e-07	2.3	33.41	Used	Used	K.MTLYLKEDQLEYLEER.R	[174-189]
	FALSE	High	[K].MTLYLKEDQLEYLEERR.[L]		2.17322e-07	5.33751e-05	1	1	47	731330156	731330156 [174-190]		2	2229.12	204.1	55.3	22.6	131.2	37.1	21.3	84.2	188.4	114.7	141		High	High	Peak Found	High	High	High	High	High	High	High	High	7.23e-06	2.922e-08	5.18	39.5	Used	Used	K.MTLYLKEDQLEYLEERR.L	[174-190]
	FALSE	High	[K].MTLYLKEDQLEYLEERR.[L]	1xOxidation [M1]	2.59061e-05	5.33751e-05	1	1	12	731330156	731330156 [174-190]		2	2245.12		47.7	6.9	227.5	140.6	40.9	11.8	162.8	135.8	226.2		Not Found	Peak Found	High	High	High	Peak Found	Peak Found	High	High	High	High	7.23e-06	3.109e-06	3.34	33.76	Used	Used	K.MTLYLKEDQLEYLEERR.L	[174-190]
	FALSE	High	[R].NKLAELLR.[Y]		0.0161755	0.0010002	1	1	14	731330156	731330156 [428-435]		1	956.589	76.4	104	23.2	261.5	287.4	64.9	79.5	54.2	37.8	11.1		High	Peak Found	High	High	High	High	High	High	High	Peak Found	High	0.0001506	0.001661	2.13	21.31	Used	Used	R.NKLAELLR.Y	[428-435]
	FALSE	High	[K].NLKLGIHEDTQNR.[N]		2.30344e-06	5.33751e-05	1	1	9	731330156	731330156 [415-427]		1	1537.81	344.2	178.7	63.4	84.7	140.6	8.9	15.8	58.7	54.1	50.7		High	High	High	Peak Found	Peak Found	Peak Found	High	High	High	Peak Found	High	7.23e-06	2.928e-07	4.04	9.6	Used	Used	K.NLKLGIHEDTQNR.N	[415-427]
	FALSE	High	[K].NLKLGIHEDTQNRNK.[L]		3.70538e-05	5.33751e-05	1	1	3	731330156	731330156 [415-429]		2	1779.95	725.2	157.1	7.9		24		20.8	14	51.1			High	High	Peak Found	Not Found	Peak Found	Not Found	Peak Found	Peak Found	Peak Found	Not Found	High	7.23e-06	4.407e-06	3.03	10.06	Used	Used	K.NLKLGIHEDTQNRNK.L	[415-429]
	FALSE	High	[K].QKPIWMR.[K]		0.0462515	0.00255017	1	1	66	731330156	731330156 [264-270]		0	958.529	88.9	93.8	70.1	106.1	78.4	136.3	222.8	51.3	91	61.3		High	High	High	High	High	High	High	High	High	High	High	0.0003783	0.004765	1.46	12.95	Used	Used	K.QKPIWMR.K	[264-270]
	FALSE	High	[K].QKPIWMR.[K]	1xGG [K2]	0.0852986	0.00421439	1	1	3	731330156	731330156 [264-270]		0	1072.57	33.2	131.3	449.9		14.1	97.5		53.8	91.1	129.2		Peak Found	High	High	Not Found	Peak Found	Peak Found	Not Found	Peak Found	Peak Found	Peak Found	High	0.0006095	0.009083	1.66	13.17	Used	Used	K.QKPIWMR.K	[264-270]
	FALSE	High	[K].RAPFDLFDTK.[K]		2.77362e-05	5.33751e-05	1	1	61	731330156	731330156 [317-326]		1	1209.63	53.2	81.5	82.5	122.6	84.2	91.1	197	101.6	88	98.2		High	High	High	High	High	High	High	High	High	High	High	7.23e-06	3.313e-06	2.49	100.6	Used	Used	K.RAPFDLFDTK.K	[317-326]
	FALSE	High	[R].RVFIMDNCEELIPEYLSFVK.[G]	1xCarbamidomethyl [C8]	7.76631e-07	5.33751e-05	2	2	58	731321951; 731330156	731321951 [343-362]; 731330156 [338-357]		1	2502.24	7.6	110.2	50.5	98.4	91.3	256.8	132.8	114.8	84.3	53.3	Shared	Peak Found	High	High	High	High	High	High	High	High	High	High	7.23e-06	1.015e-07	4.11	77	Used	Used	R.RVFIMDNCEELIPEYLSFVK.G	[338-357]
	FALSE	High	[R].RVFIMDNCEELIPEYLSFVK.[G]	1xCarbamidomethyl [C8]; 1xOxidation [M5]	0.00117193	0.000154279	2	2	1	731321951; 731330156	731321951 [343-362]; 731330156 [338-357]		1	2518.24				113.6	412.9		49.1		62.8	361.6	Shared	Not Found	Not Found	Not Found	Peak Found	Peak Found	Not Found	Peak Found	Not Found	Peak Found	High	High	2.424e-05	0.0001232	1.8	77.84	Used	Used	R.RVFIMDNCEELIPEYLSFVK.G	[338-357]
	FALSE	High	[K].SGEEMTSLKDYVTR.[M]		4.30387e-07	5.33751e-05	1	1	148	731330156	731330156 [441-454]		1	1615.76	83.6	150.1	58.5	110.8	170.9	73.1	94.9	72.6	89.9	95.6		High	High	High	High	High	High	High	High	High	High	High	7.23e-06	5.706e-08	5.2	24.8	Used	Used	K.SGEEMTSLKDYVTR.M	[441-454]
	FALSE	High	[K].SGEEMTSLKDYVTR.[M]	1xOxidation [M5]	3.30862e-06	5.33751e-05	1	1	13	731330156	731330156 [441-454]		1	1631.76	26.8	75.6	39.6	41.2	17.9	22.4	33.5	10.2	21.3	711.5		Peak Found	High	Peak Found	High	Peak Found	High	High	High	Peak Found	High	High	7.23e-06	4.168e-07	3.66	12.35	Used	Used	K.SGEEMTSLKDYVTR.M	[441-454]
	FALSE	High	[K].SGEEMTSLKDYVTR.[M]	1xGG [K9]	0.0398839	0.00228592	1	1	1	731330156	731330156 [441-454]		1	1729.81		96.6	180.4	74.9		135.9	133	179.2	101.5	98.6		Not Found	High	Peak Found	Peak Found	Not Found	Peak Found	Peak Found	Peak Found	Peak Found	Peak Found	High	0.0003377	0.004088	1.71	19.62	Used	Used	K.SGEEMTSLKDYVTR.M	[441-454]
	FALSE	High	[K].SKLEAQPELFIHIVPDKTNNSLTIIDSGIGMTK.[A]		1.41043e-07	5.33751e-05	1	1	12	731330156	731330156 [55-87]		2	3609.92	70.5	77.7	376.5			116.8	130.3	100.5	91.1	36.6		High	High	High	Not Found	Not Found	High	High	High	High	High	High	7.23e-06	1.917e-08	7.24	108.01	Used	Used	K.SKLEAQPELFIHIVPDKTNNSLTIIDSGIGMTK.A	[55-87]
	FALSE	High	[K].SLTNDWEEHLQVK.[H]		3.14393e-06	5.33751e-05	1	1	72	731330156	731330156 [286-298]		0	1598.78	26.6	91.8	187	55.7	130.2	112.3	117.5	104.5	90.9	83.5		High	High	High	High	High	High	High	High	High	High	High	7.23e-06	3.966e-07	3.87	30.17	Used	Used	K.SLTNDWEEHLQVK.H	[286-298]
	FALSE	High	[K].SLTNDWEEHLQVKHFSVEGQLEFK.[A]		0.000200008	9.51359e-05	1	1	1	731330156	731330156 [286-309]		1	2900.42	1000											High	Not Found	Not Found	Not Found	Not Found	Not Found	Not Found	Not Found	Not Found	Not Found	High	1.696e-05	2.303e-05	3.04	47.52	Used	Used	K.SLTNDWEEHLQVKHFSVEGQLEFK.A	[286-309]
	FALSE	High	[K].SVKDLVLLLHETALLTSGFSLDDPNTFGNR.[I]		2.33712e-09	5.33751e-05	1	1	40	731330156	731330156 [629-658]		1	3272.72	95	54.9	83.6	43.4	144.1	61.9	127.6	169.9	136.7	82.8		High	High	High	High	High	High	High	High	High	High	High	7.23e-06	3.527e-10	5.9	108.2	Used	Used	K.SVKDLVLLLHETALLTSGFSLDDPNTFGNR.I	[629-658]
	FALSE	High	[K].SVKDLVLLLHETALLTSGFSLDDPNTFGNRIHR.[M]		1.65439e-05	5.33751e-05	1	1	2	731330156	731330156 [629-661]		2	3678.96	320	141.6	8.7	113.1	70.5		293.5		20.2	32.4		High	High	Peak Found	Peak Found	Peak Found	Not Found	Peak Found	Not Found	Peak Found	Peak Found	High	7.23e-06	2.005e-06	3.53	108.74	Used	Used	K.SVKDLVLLLHETALLTSGFSLDDPNTFGNRIHR.M	[629-661]
	FALSE	High	[K].TMEINPENPIMEELR.[K]		1.43419e-06	5.33751e-05	1	1	42	731330156	731330156 [604-618]		0	1815.86	270.6	218.6	9.5	103.7	77.8	44.3	39.1	76.8	99.8	59.9		High	High	High	High	High	High	High	High	High	High	High	7.23e-06	1.843e-07	3.09	52.85	Used	Used	K.TMEINPENPIMEELR.K	[604-618]
	FALSE	High	[K].TMEINPENPIMEELRK.[R]		1.39738e-07	5.33751e-05	1	1	76	731330156	731330156 [604-619]		1	1943.96	335	136.1	32.8	87.3	43.6	81.1	71.5	58.9	100.5	53		High	High	High	High	High	High	High	High	High	High	High	7.23e-06	1.902e-08	4.87	43.08	Used	Used	K.TMEINPENPIMEELRK.R	[604-619]
	FALSE	High	[K].TMEINPENPIMEELRK.[R]	1xOxidation [M2]	0.000153668	9.51359e-05	1	1	2	731330156	731330156 [604-619]		1	1959.95		6.9			89.5	62.7	597.9		144.9	98.1		Not Found	Peak Found	Not Found	Not Found	Peak Found	Peak Found	High	Not Found	High	Peak Found	High	1.696e-05	1.795e-05	2.95	37.38	Used	Used	K.TMEINPENPIMEELRK.R	[604-619]
	FALSE	High	[K].TMEINPENPIMEELRK.[R]	2xOxidation [M2; M11]	1.09295e-05	5.33751e-05	1	1	1	731330156	731330156 [604-619]		1	1975.95						421.2			71.5	507.3		Not Found	Not Found	Not Found	Not Found	Not Found	Peak Found	Not Found	Not Found	Peak Found	High	High	7.23e-06	1.333e-06	4.68	18.27	Used	Used	K.TMEINPENPIMEELRK.R	[604-619]
	FALSE	High	[K].TMEINPENPIMEELRKR.[A]		2.40838e-05	5.33751e-05	1	1	8	731330156	731330156 [604-620]		2	2100.06	10.4	11.5		716.6		5.8	12.7	164.1	7.2	71.7		High	Peak Found	Not Found	High	Not Found	Peak Found	Peak Found	High	Peak Found	Peak Found	High	7.23e-06	2.887e-06	4.16	38.11	Used	Used	K.TMEINPENPIMEELRKR.A	[604-620]
	FALSE	High	[K].TNNSLTIIDSGIGMTK.[A]		2.07971e-06	5.33751e-05	1	1	11	731330156	731330156 [72-87]		0	1664.85		28.1	99.3	58.1	22.6	192.3	157.8	135.4	132	174.5		Not Found	Peak Found	High	Peak Found	Peak Found	High	High	High	High	High	High	7.23e-06	2.65e-07	3.33	33.82	Used	Used	K.TNNSLTIIDSGIGMTK.A	[72-87]
	FALSE	High	[R].VFIMDNCEELIPEYLSFVK.[G]	1xCarbamidomethyl [C7]	8.47686e-06	5.33751e-05	2	2	51	731321951; 731330156	731321951 [344-362]; 731330156 [339-357]		0	2346.14	5.7	177.8	209.5	106.2	72.6	101	95	101.6	84.7	45.9	Shared	Peak Found	High	High	High	High	High	High	High	High	High	High	7.23e-06	1.042e-06	2.91	92.4	Used	Used	R.VFIMDNCEELIPEYLSFVK.G	[339-357]
	FALSE	High	[R].VFIMDNCEELIPEYLSFVK.[G]	1xCarbamidomethyl [C7]; 1xOxidation [M4]	0.000403625	0.000126394	2	2	6	731321951; 731330156	731321951 [344-362]; 731330156 [339-357]		0	2362.13	90.2	114	328.9	22.3		75.9				368.6	Shared	Peak Found	Peak Found	Peak Found	High	Not Found	Peak Found	Not Found	Not Found	Not Found	High	High	1.859e-05	4.477e-05	2.06	83.17	Used	Used	R.VFIMDNCEELIPEYLSFVK.G	[339-357]
	FALSE	High	[K].VIVTTKHNDDEQYVWESQAGGSFTVTR.[D]		8.36582e-07	5.33751e-05	1	1	6	731330156	731330156 [135-161]		1	3067.48	445	256.2		65.8	9.3	44.4	19.1	97.8	37.9	24.4		High	High	Not Found	High	Peak Found	Peak Found	Peak Found	High	Peak Found	High	High	7.23e-06	1.088e-07	3.09	31.46	Used	Used	K.VIVTTKHNDDEQYVWESQAGGSFTVTR.D	[135-161]
	FALSE	High	[K].VMKDVLGDKVEK.[V]		1.31912e-06	5.33751e-05	1	1	62	731330156	731330156 [545-556]		2	1360.75	104.1	75	121.3	146.3	137.5	71	92.4	70.7	109.6	71.9		High	High	High	High	High	High	High	High	High	High	High	7.23e-06	1.701e-07	3.66	10.22	Used	Used	K.VMKDVLGDKVEK.V	[545-556]
	FALSE	High	[R].VVDSPCCLVTGEYGWSANMER.[I]	2xCarbamidomethyl [C6; C7]	3.42723e-07	5.33751e-05	1	1	27	731330156	731330156 [563-583]		0	2430.05	4.4	221		74.6	60.9	55.6	56.2	289.2	144.6	93.5		Peak Found	High	Not Found	High	High	High	Peak Found	High	High	High	High	7.23e-06	4.555e-08	3.44	50.94	Used	Used	R.VVDSPCCLVTGEYGWSANMER.I	[563-583]
	FALSE	High	[K].VVVSDRVVDSPCCLVTGEYGWSANMER.[I]	2xCarbamidomethyl [C12; C13]	2.068e-08	5.33751e-05	1	1	41	731330156	731330156 [557-583]		1	3085.42	7.5	220.5	23.3	148.7	179.6	49.3	74.1	149.3	81.3	66.4		Peak Found	High	High	High	High	High	High	High	High	High	High	7.23e-06	2.958e-09	4.45	50.38	Used	Used	K.VVVSDRVVDSPCCLVTGEYGWSANMER.I	[557-583]
	FALSE	High	[R].YHSTKSGEEMTSLKDYVTR.[M]		1.6215e-07	5.33751e-05	1	1	21	731330156	731330156 [436-454]		2	2232.06	441	12.9	4.5	77.8	281.1	18	34.6	15	75.1	39.8		High	Peak Found	Peak Found	High	High	Peak Found	High	High	High	High	High	7.23e-06	2.196e-08	3.42	18.2	Used	Used	R.YHSTKSGEEMTSLKDYVTR.M	[436-454]
	FALSE	High	[R].YHSTKSGEEMTSLKDYVTR.[M]	1xGG [K5]	1.07792e-05	5.33751e-05	1	1	1	731330156	731330156 [436-454]		2	2346.1											Not Reliable	Not Found	High	Not Found	Not Found	Not Found	Not Found	Not Found	Not Found	Not Found	Not Found	High	7.23e-06	1.315e-06	4.65		Not Used	Not Used	R.YHSTKSGEEMTSLKDYVTR.M	[436-454]
FALSE		High	Master Protein	2594060806488363212	2997	731333855	PREDICTED: glyceraldehyde-3-phosphate dehydrogenase [Beta vulgaris subsp. vulgaris]	MAKIKIGINGFGRIGRLVARVILQRDDVELVAVNDPFITTDYMTYMFKYDSVHGQWKHHELKVKDEKTLLFGEKPVSVFGCRNPEEIPWSQTGADFVVESTGVFTDKDKAAAHLKGGAKKVVISAPSKDAPMFVVGVNEHEYKSDLHIVSNASCTTNCLAPLAKVINDKFGIVEGLMTTVHSITATQKTVDGPSAKDWRGGRAASFNIIPSSTGAAKAVGKVLPALNGKLTGMAFRVPTVDVSVVDLTVRLEKAATYEDIKAAIKAESEGKMKGILGYTEDDVVSTDFIGDNRSSIFDAKAGIALNDHFAKLVSWYDNEWGYSSRVVDLIVHMSKTE	>gi|731333855|ref|XP_010677936.1| PREDICTED: glyceraldehyde-3-phosphate dehydrogenase [Beta vulgaris subsp. vulgaris]	0	878.913	97	53	3389	38	38	337	36.7	7.25	8595.77	97	3389	53	17	125.9	125.4	79	95.2	91.1	106.4	95.5	102.9	91.2	87.3	4.88067e+09	9.87645e+09	3.8487e+09	3.81432e+09	1.3993e+09	6.9044e+09	3.17438e+09	4.8189e+09	5.23877e+09	4.82964e+09	9.9188e+09	9.87645e+09	6.22435e+09	7.50016e+09	7.17879e+09
	Checked	Confidence	Annotated Sequence	Modifications	Qvality PEP	Qvality q-value	# Protein Groups	# Proteins	# PSMs	Master Protein Accessions	Positions in Master Proteins	Modifications in Master Proteins	# Missed Cleavages	Theo. MH+ [Da]	Abundances (Scaled): F1: Control	Abundances (Scaled): F2: Control	Abundances (Scaled): F3: Control	Abundances (Scaled): F4: Control	Abundances (Scaled): F5: Control	Abundances (Scaled): F6: Sample	Abundances (Scaled): F7: Sample	Abundances (Scaled): F8: Sample	Abundances (Scaled): F9: Sample	Abundances (Scaled): F10: Sample	Quan Info	Found in Sample: [S1] F1: Control	Found in Sample: [S2] F2: Control	Found in Sample: [S3] F3: Control	Found in Sample: [S4] F4: Control	Found in Sample: [S5] F5: Control	Found in Sample: [S6] F6: Sample	Found in Sample: [S7] F7: Sample	Found in Sample: [S8] F8: Sample	Found in Sample: [S9] F9: Sample	Found in Sample: [S10] F10: Sample	Confidence (by Search Engine): Sequest HT	Percolator q-Value (by Search Engine): Sequest HT	Percolator PEP (by Search Engine): Sequest HT	XCorr (by Search Engine): Sequest HT	Top Apex RT [min]	Quan Usage	Quan Ratio Usage	Sequence in Protein	Positions in Proteins
	FALSE	High	[R].AASFNIIPSSTGAAK.[A]		5.66185e-07	5.33751e-05	2	2	162	731333855; 731343396	731333855 [203-217]; 731343396 [205-219]		0	1434.76	184.4	119.5	15.8	47.2	52.3	101.1	118	110.6	109.3	141.6	Shared	High	High	High	High	High	High	High	High	High	High	High	7.23e-06	7.452e-08	3.75	27.2	Used	Used	R.AASFNIIPSSTGAAK.A	[203-217]
	FALSE	High	[R].AASFNIIPSSTGAAKAVGK.[V]		3.77864e-07	5.33751e-05	2	2	18	731333855; 731343396	731333855 [203-221]; 731343396 [205-223]		1	1789.98	255.6	26.5	27.7	15	95.3		82.9	205.8	90.1	201	Shared	High	Peak Found	Peak Found	High	High	Not Found	Peak Found	High	High	High	High	7.23e-06	5.014e-08	3.23	24.72	Used	Used	R.AASFNIIPSSTGAAKAVGK.V	[203-221]
	FALSE	High	[R].AASFNIIPSSTGAAKAVGK.[V]	1xGG [K/S/T]	1.28286e-06	5.33751e-05	2	2	16	731333855; 731343396	731333855 [203-221]; 731343396 [205-223]		1	1904.02	7.4	157.3	405.1	15.9	23.5	87.6	78.1	47.9	46.9	130.3	Shared	Peak Found	High	High	High	Peak Found	High	Peak Found	Peak Found	High	High	High	7.23e-06	1.654e-07	2.98	18.54	Used	Used	R.AASFNIIPSSTGAAKAVGK.V	[203-221]
	FALSE	High	[K].AATYEDIK.[A]		0.000388305	0.000126394	1	1	19	731333855	731333855 [254-261]		0	910.452	7.6		11.4	6.9	33.5	360.2	290.9	50.3	150.2	89.2		High	Not Found	High	High	High	High	High	High	High	High	High	1.859e-05	4.302e-05	1.94	10.2	Used	Used	K.AATYEDIK.A	[254-261]
	FALSE	High	[K].AATYEDIKAAIK.[A]		3.26287e-06	5.33751e-05	1	1	58	731333855	731333855 [254-265]		1	1293.7	92.8	152.6	145.8	92.4	92.6	83	78.5	83.3	87.1	91.8		High	High	High	High	High	High	High	High	High	High	High	7.23e-06	4.11e-07	3.54	12.83	Used	Used	K.AATYEDIKAAIK.A	[254-265]
	FALSE	High	[K].AATYEDIKAAIK.[A]	1xGG [K8]	0.000335768	0.000126394	1	1	2	731333855	731333855 [254-265]		1	1407.75		15.4	470.8	6.2		272.5	110.2	62.1	62.8			Not Found	Peak Found	High	Peak Found	Not Found	Peak Found	Peak Found	Peak Found	Peak Found	Not Found	High	1.859e-05	3.762e-05	1.92	16.71	Used	Used	K.AATYEDIKAAIK.A	[254-265]
	FALSE	High	[K].AATYEDIKAAIKAESEGK.[M]		4.69372e-09	5.33751e-05	1	1	188	731333855	731333855 [254-271]		2	1894.98	181.1	83.3	57.5	140.2	192.8	69.9	88.5	67.5	62	57.2		High	High	High	High	High	High	High	High	High	High	High	7.23e-06	6.966e-10	5.23	98.23	Used	Used	K.AATYEDIKAAIKAESEGK.M	[254-271]
	FALSE	High	[K].AATYEDIKAAIKAESEGK.[M]	1xGG [K8]	9.39666e-05	5.33751e-05	1	1	8	731333855	731333855 [254-271]		2	2009.02	2.9	58.1	215.1	16.5	32.2	142.4	64.9	25	167	275.9		Peak Found	High	High	Peak Found	Peak Found	High	Peak Found	Peak Found	Peak Found	High	High	7.23e-06	1.104e-05	2.19	25.92	Used	Used	K.AATYEDIKAAIKAESEGK.M	[254-271]
	FALSE	High	[K].AGIALNDHFAK.[L]		1.16053e-05	5.33751e-05	1	1	116	731333855	731333855 [301-311]		0	1156.61	168.4	170.2	92.8	71	67.9	66.6	95.2	72.2	89.9	105.8		High	High	High	High	High	High	High	High	High	High	High	7.23e-06	1.414e-06	2.73	12.2	Used	Used	K.AGIALNDHFAK.L	[301-311]
	FALSE	High	[K].AGIALNDHFAKLVSWYDNEWGYSSR.[V]		1.30106e-09	5.33751e-05	1	1	56	731333855	731333855 [301-325]		1	2899.38	374.5	50.5	20.4	81.7	75.4	4.3	43.1	113.6	211.9	24.6		High	High	Peak Found	High	High	Peak Found	High	High	High	High	High	7.23e-06	1.99e-10	5.23	72.46	Used	Used	K.AGIALNDHFAKLVSWYDNEWGYSSR.V	[301-325]
	FALSE	High	[K].AVGKVLPALNGK.[L]		0.000250313	9.51359e-05	1	1	8	731333855	731333855 [218-229]		1	1166.73	350	107.7		137.6	15		97.4	76.8	124.2	91.4		High	Peak Found	Not Found	High	Peak Found	Not Found	Peak Found	Peak Found	High	Peak Found	High	1.696e-05	2.847e-05	1.86	12.52	Used	Used	K.AVGKVLPALNGK.L	[218-229]
	FALSE	High	[K].DAPMFVVGVNEHEYK.[S]		1.30086e-06	5.33751e-05	1	1	55	731333855	731333855 [129-143]		0	1734.82	47	51.9	334.3	62.7	63.5	100.1	88.7	125.8	59.7	66.3		High	High	High	High	High	High	High	High	High	High	High	7.23e-06	1.677e-07	3.08	21.74	Used	Used	K.DAPMFVVGVNEHEYK.S	[129-143]
	FALSE	High	[K].DAPMFVVGVNEHEYK.[S]	1xOxidation [M4]	0.000488566	0.000126394	1	1	2	731333855	731333855 [129-143]		0	1750.81		21	47.3	514.4			7.2		8.1	401.9		Not Found	Peak Found	Peak Found	Peak Found	Not Found	Not Found	Peak Found	Not Found	Peak Found	High	High	1.859e-05	5.368e-05	2.14	18.68	Used	Used	K.DAPMFVVGVNEHEYK.S	[129-143]
	FALSE	High	[K].DAPMFVVGVNEHEYKSDLHIVSNASCTTNCLAPLAK.[V]	2xCarbamidomethyl [C26; C30]	3.77864e-07	5.33751e-05	1	1	20	731333855	731333855 [129-164]		1	3987.9		169.8	14.2	101.7	14.6	72.5	74.4	352	140.6	60.2		Not Found	High	Peak Found	High	High	High	High	High	High	High	High	7.23e-06	5.017e-08	7.11	48.38	Used	Used	K.DAPMFVVGVNEHEYKSDLHIVSNASCTTNCLAPLAK.V	[129-164]
	FALSE	High	[R].DDVELVAVNDPFITTDYMTYMFK.[Y]		7.76631e-07	5.33751e-05	1	1	25	731333855	731333855 [26-48]		0	2727.26	3.1	31.1	324.3	136.4	55.4	98	60.8	188.9	81.7	20.2		Peak Found	High	High	High	Peak Found	High	High	High	High	High	High	7.23e-06	1.013e-07	3.92	99.33	Used	Used	R.DDVELVAVNDPFITTDYMTYMFK.Y	[26-48]
	FALSE	High	[K].FGIVEGLMTTVHSITATQK.[T]		3.97042e-09	5.33751e-05	1	1	128	731333855	731333855 [170-188]		0	2033.07	37.6	51.4	28.1	106.8	39.2	277.4	150	143.2	73.5	92.9		High	High	High	High	High	High	High	High	High	High	High	7.23e-06	5.92e-10	4.79	70.88	Used	Used	K.FGIVEGLMTTVHSITATQK.T	[170-188]
	FALSE	High	[K].FGIVEGLMTTVHSITATQK.[T]	1xOxidation [M8]	1.15489e-07	5.33751e-05	1	1	38	731333855	731333855 [170-188]		0	2049.07	2.7	43.8	31.9	208.5	141.7	101.3	31.3	49.9	25.3	363.6		Peak Found	High	High	High	High	High	Peak Found	High	High	High	High	7.23e-06	1.582e-08	3.64	75.33	Used	Used	K.FGIVEGLMTTVHSITATQK.T	[170-188]
	FALSE	High	[R].GGRAASFNIIPSSTGAAK.[A]		2.19813e-05	5.33751e-05	2	2	6	731333855; 731343396	731333855 [200-217]; 731343396 [202-219]		1	1704.9	366.5			78.9	37.7	20	23.4	250.7	134.4	88.5	Shared	High	Not Found	Not Found	Peak Found	High	Peak Found	Peak Found	High	Peak Found	Peak Found	High	7.23e-06	2.643e-06	2.91	18.57	Used	Used	R.GGRAASFNIIPSSTGAAK.A	[200-217]
	FALSE	High	[R].GGRAASFNIIPSSTGAAKAVGK.[V]		5.93508e-06	5.33751e-05	2	2	3	731333855; 731343396	731333855 [200-221]; 731343396 [202-223]		2	2060.12	7		169.9	103.9	45.1	83.4	167.5	210.6	55	157.4	Shared	Peak Found	Not Found	Peak Found	Peak Found	Peak Found	Peak Found	Peak Found	High	Peak Found	Peak Found	High	7.23e-06	7.37e-07	4.19	13.45	Used	Used	R.GGRAASFNIIPSSTGAAKAVGK.V	[200-221]
	FALSE	High	[K].GILGYTEDDVVSTDFIGDNR.[S]		5.49744e-09	5.33751e-05	2	2	167	731333855; 731343396	731333855 [274-293]; 731343396 [276-295]		0	2186.02	186.7	210.8	30	107.3	66.7	44.2	39.1	145.3	105.5	64.4	Shared	High	High	High	High	High	High	High	High	High	High	High	7.23e-06	8.108e-10	4.55	61.64	Used	Used	K.GILGYTEDDVVSTDFIGDNR.S	[274-293]
	FALSE	High	[K].GILGYTEDDVVSTDFIGDNRSSIFDAK.[A]		3.86688e-10	5.33751e-05	2	2	19	731333855; 731343396	731333855 [274-300]; 731343396 [276-302]		1	2934.4	345.3	123.9	7.1	201.9	30.5	0.7	37.3	164.2	47.5	41.8	Shared	High	High	High	High	Peak Found	Peak Found	High	High	High	High	High	7.23e-06	6.113e-11	7.72	66.92	Used	Used	K.GILGYTEDDVVSTDFIGDNRSSIFDAK.A	[274-300]
	FALSE	High	[K].GILGYTEDDVVSTDFIGDNRSSIFDAKAGIALNDHFAK.[L]		0.140573	0.00676907	1	1	1	731333855	731333855 [274-311]		2	4071.99											No Quan Values	High	Not Found	Not Found	Not Found	Not Found	Not Found	Not Found	Not Found	Not Found	Not Found	High	0.0009936	0.01627	2.35		Not Used	Not Used	K.GILGYTEDDVVSTDFIGDNRSSIFDAKAGIALNDHFAK.L	[274-311]
	FALSE	High	[K].KVVISAPSK.[D]		0.000230165	9.51359e-05	2	2	4	731333855; 731343396	731333855 [120-128]; 731343396 [122-130]		1	928.583	65.2			15.8	16.9	846.1	3.6	13.5	14.1	24.7	Shared	High	Not Found	Not Found	Peak Found	Peak Found	High	Peak Found	Peak Found	Peak Found	High	High	1.696e-05	2.626e-05	2.63	9.98	Used	Used	K.KVVISAPSK.D	[120-128]
	FALSE	High	[K].KVVISAPSKDAPMFVVGVNEHEYK.[S]		1.62393e-08	5.33751e-05	1	1	79	731333855	731333855 [120-143]		2	2644.38	98.5	76.6	57.7	270.9	110.1	107.8	95.3	58.9	70.3	53.8		High	High	High	High	High	High	High	High	High	High	High	7.23e-06	2.335e-09	5.69	104.89	Used	Used	K.KVVISAPSKDAPMFVVGVNEHEYK.S	[120-143]
	FALSE	High	[K].KVVISAPSKDAPMFVVGVNEHEYK.[S]	1xOxidation [M13]	1.64868e-06	5.33751e-05	1	1	10	731333855	731333855 [120-143]		2	2660.38			193.9		301.2	18.9		23.4		462.6		Not Found	Not Found	High	Not Found	High	Peak Found	Not Found	Peak Found	Not Found	High	High	7.23e-06	2.112e-07	6.42	17.35	Used	Used	K.KVVISAPSKDAPMFVVGVNEHEYK.S	[120-143]
	FALSE	High	[K].IGINGFGR.[I]		0.000315132	0.000126394	3	3	19	731363395; 731333855; 731343396	731363395 [87-94]; 731333855 [6-13]; 731343396 [8-15]		0	833.463	52.6	39.2	56.3	101.1	83.3	164	109.7	89.9	142.7	161.3	Shared	High	High	High	High	High	High	High	High	High	High	High	1.859e-05	3.537e-05	1.96	17.33	Used	Used	K.IGINGFGR.I	[6-13]
	FALSE	High	[K].IKIGINGFGR.[I]		0.000520296	0.000126394	3	3	25	731363395; 731333855; 731343396	731363395 [85-94]; 731333855 [4-13]; 731343396 [6-15]		1	1074.64	154.3	96.6	81.8	180.7	136.8	56	76.1	67.8	82.5	67.3	Shared	High	High	High	High	High	High	High	High	High	High	High	1.859e-05	5.703e-05	2.45	24.07	Used	Used	K.IKIGINGFGR.I	[4-13]
	FALSE	High	[K].LTGMAFR.[V]		0.00252582	0.000222105	2	2	48	731363395; 731333855	731363395 [310-316]; 731333855 [230-236]		0	795.418	37.8	65.7	147.8	84.9	78.8	104.8	138	97	136.5	108.7	Shared	High	High	High	High	High	High	High	High	High	High	High	3.769e-05	0.0002567	2.02	11.68	Used	Used	K.LTGMAFR.V	[230-236]
	FALSE	High	[K].LTGMAFR.[V]	1xOxidation [M4]	0.0082034	0.000556166	2	2	4	731363395; 731333855	731363395 [310-316]; 731333855 [230-236]		0	811.413	2.2	4.3	297.9	6.1	14.3	148	158.5	45.2	107.2	216.3	Shared	Peak Found	Peak Found	Peak Found	High	Peak Found	High	High	Peak Found	Peak Found	High	High	8.164e-05	0.0008387	1.45	13.96	Used	Used	K.LTGMAFR.V	[230-236]
	FALSE	High	[K].LTGMAFRVPTVDVSVVDLTVR.[L]		3.65171e-09	5.33751e-05	1	1	19	731333855	731333855 [230-250]		1	2275.25	253.3	97.1	53.7	62.5	16.2	51.7	158	123.7	143.6	40.2		High	High	Peak Found	High	Peak Found	Peak Found	High	High	High	High	High	7.23e-06	5.454e-10	5.05	67.38	Used	Used	K.LTGMAFRVPTVDVSVVDLTVR.L	[230-250]
	FALSE	High	[K].LTGMAFRVPTVDVSVVDLTVR.[L]	1xOxidation [M4]	0.00101863	0.000154279	1	1	2	731333855	731333855 [230-250]		1	2291.24	756	128.3		115.8								Peak Found	High	Not Found	High	Not Found	Not Found	Not Found	Not Found	Not Found	Not Found	High	2.424e-05	0.000108	1.73	66.48	Used	Used	K.LTGMAFRVPTVDVSVVDLTVR.L	[230-250]
	FALSE	High	[K].LTGMAFRVPTVDVSVVDLTVRLEK.[A]		9.98204e-10	5.33751e-05	1	1	27	731333855	731333855 [230-253]		2	2645.47	690.2	110	23.2	45.6	10.8	1.1	8.4	59.1	40.1	11.6		High	High	Peak Found	High	High	Peak Found	Peak Found	High	High	High	High	7.23e-06	1.541e-10	6.05	72.63	Used	Used	K.LTGMAFRVPTVDVSVVDLTVRLEK.A	[230-253]
	FALSE	High	[K].LTGMAFRVPTVDVSVVDLTVRLEK.[A]	1xOxidation [M4]	2.54918e-08	5.33751e-05	1	1	1	731333855	731333855 [230-253]		2	2661.46	1000											High	Not Found	Not Found	Not Found	Not Found	Not Found	Not Found	Not Found	Not Found	Not Found	High	7.23e-06	3.623e-09	4.55	72.31	Used	Used	K.LTGMAFRVPTVDVSVVDLTVRLEK.A	[230-253]
	FALSE	High	[K].LVSWYDNEWGYSSR.[V]		9.5284e-07	5.33751e-05	2	2	290	731333855; 731343396	731333855 [312-325]; 731343396 [314-327]		0	1761.79	76.2	124.8	77.3	104.7	97	103	73.8	157.3	96.3	89.6	Shared	High	High	High	High	High	High	High	High	High	High	High	7.23e-06	1.236e-07	2.7	50.27	Used	Used	K.LVSWYDNEWGYSSR.V	[312-325]
	FALSE	High	[K].LVSWYDNEWGYSSRVVDLIVHMSKTE.[-]		2.34662e-06	5.33751e-05	1	1	13	731333855	731333855 [312-337]		2	3113.5	43	186	13.6	201.9	77.9		255.4	52.3	158.5	11.4		Peak Found	High	Peak Found	High	Peak Found	Not Found	High	High	Peak Found	High	High	7.23e-06	2.977e-07	2.94	105.11	Used	Used	K.LVSWYDNEWGYSSRVVDLIVHMSKTE.-	[312-337]
	FALSE	High	[-].MAKIKIGINGFGR.[I]	1xMet-loss [N-Term]	0.000486039	0.000126394	1	1	10	731333855	731333855 [1-13]	731333855 1xMet-loss [N-Term]	2	1273.77	187.3	71.4	20.9	49.1	37.4	44.4	69.7	212.9	176.9	130		High	Peak Found	Peak Found	High	High	Peak Found	Peak Found	High	High	Peak Found	High	1.859e-05	5.328e-05	2.13	13.16	Used	Used	-.MAKIKIGINGFGR.I	[1-13]
	FALSE	High	[-].MAKIKIGINGFGR.[I]	1xGG [K3]	0.0123337	0.000882483	1	1	1	731333855	731333855 [1-13]		2	1518.86											Not Reliable	High	Not Found	Not Found	Not Found	Not Found	Not Found	Not Found	Not Found	Not Found	Not Found	High	0.000128	0.001265	1.93		Not Used	Not Used	-.MAKIKIGINGFGR.I	[1-13]
	FALSE	High	[K].MKGILGYTEDDVVSTDFIGDNR.[S]		8.96983e-10	5.33751e-05	1	1	71	731333855	731333855 [272-293]		1	2445.16	197	209.4	32	155.3	54.1	42.7	36	160	63.6	49.9		High	High	High	High	High	High	High	High	High	High	High	7.23e-06	1.391e-10	4.85	54.12	Used	Used	K.MKGILGYTEDDVVSTDFIGDNR.S	[272-293]
	FALSE	High	[K].MKGILGYTEDDVVSTDFIGDNR.[S]	1xOxidation [M1]	1.11791e-07	5.33751e-05	1	1	22	731333855	731333855 [272-293]		1	2461.16	50.4	102.8	16.2	77.2	368.1	19.2	16.1	74.2	62.3	213.6		Peak Found	Peak Found	High	High	High	High	Peak Found	High	High	High	High	7.23e-06	1.53e-08	3.39	49.56	Used	Used	K.MKGILGYTEDDVVSTDFIGDNR.S	[272-293]
	FALSE	High	[K].MKGILGYTEDDVVSTDFIGDNRSSIFDAK.[A]		1.27491e-11	5.33751e-05	1	1	15	731333855	731333855 [272-300]		2	3193.54	595.1	149.9	2.5	70.9	50.8		20	62	19.3	29.7		High	High	Peak Found	High	Peak Found	Not Found	Peak Found	High	Peak Found	High	High	7.23e-06	2.195e-12	7.78	61.59	Used	Used	K.MKGILGYTEDDVVSTDFIGDNRSSIFDAK.A	[272-300]
	FALSE	High	[R].NPEEIPWSQTGADFVVESTGVFTDKDK.[A]		4.06976e-10	5.33751e-05	1	1	74	731333855	731333855 [83-109]		1	2996.42	40	91.9	161.2	116.8	60.6	97.7	95.1	153.6	102.3	80.8		High	High	High	High	High	High	High	High	High	High	High	7.23e-06	6.41e-11	6.4	70.78	Used	Used	R.NPEEIPWSQTGADFVVESTGVFTDKDK.A	[83-109]
	FALSE	High	[R].NPEEIPWSQTGADFVVESTGVFTDKDKAAAHLK.[G]		3.69123e-10	5.33751e-05	1	1	75	731333855	731333855 [83-115]		2	3587.77	139.4	98.4	116.4	168.5	56.7	98.6	62.3	85.7	108.5	65.6		High	High	High	High	High	High	High	High	High	High	High	7.23e-06	5.851e-11	7	58.6	Used	Used	R.NPEEIPWSQTGADFVVESTGVFTDKDKAAAHLK.G	[83-115]
	FALSE	High	[K].SDLHIVSNASCTTNCLAPLAK.[V]	2xCarbamidomethyl [C11; C15]	1.4369e-07	5.33751e-05	1	1	71	731333855	731333855 [144-164]		0	2272.11	3.7	70.5	105.1	101.2	116.6	141.1	98.1	143.3	83.3	137.3		Peak Found	High	High	High	High	High	High	High	High	High	High	7.23e-06	1.957e-08	5.86	22.55	Used	Used	K.SDLHIVSNASCTTNCLAPLAK.V	[144-164]
	FALSE	High	[R].SSIFDAK.[A]		0.00118799	0.000154279	3	3	66	731363395; 731333855; 731343396	731363395 [374-380]; 731333855 [294-300]; 731343396 [296-302]		0	767.393	63.6	65	92.7	18.8	84.7	161.1	184.1	70.9	148.8	110.3	Shared	High	High	High	High	High	High	High	High	High	High	High	2.424e-05	0.0001246	1.49	13.17	Used	Used	R.SSIFDAK.A	[294-300]
	FALSE	High	[R].SSIFDAKAGIALNDHFAK.[L]		4.53589e-06	5.33751e-05	1	1	2	731333855	731333855 [294-311]		1	1904.99	787.5	80.5		21.3	18	34.4	26.7			31.6		High	Peak Found	Not Found	Peak Found	Peak Found	Peak Found	Peak Found	Not Found	Not Found	Peak Found	High	7.23e-06	5.672e-07	4.13	33.16	Used	Used	R.SSIFDAKAGIALNDHFAK.L	[294-311]
	FALSE	High	[R].SSIFDAKAGIALNDHFAK.[L]	1xGG [K7]	0.00140357	0.000154279	1	1	1	731333855	731333855 [294-311]		1	2019.03		309.7	247.1	31.7	18.1				68.7	324.6		Not Found	High	Peak Found	Peak Found	Peak Found	Not Found	Not Found	Not Found	Peak Found	Peak Found	High	2.424e-05	0.0001459	1.95	26.52	Used	Used	R.SSIFDAKAGIALNDHFAK.L	[294-311]
	FALSE	High	[K].TLLFGEKPVSVFGCR.[N]	1xCarbamidomethyl [C14]	3.76112e-07	5.33751e-05	1	1	112	731333855	731333855 [68-82]		0	1709.9	6.7	79.3	97.4	115.4	257.6	156	83.6	54.1	66.5	83.1		High	High	High	High	High	High	High	High	High	High	High	7.23e-06	5e-08	4.63	43.31	Used	Used	K.TLLFGEKPVSVFGCR.N	[68-82]
	FALSE	High	[K].TLLFGEKPVSVFGCRNPEEIPWSQTGADFVVESTGVFTDKDK.[A]	1xCarbamidomethyl [C14]	3.03207e-09	5.33751e-05	1	1	34	731333855	731333855 [68-109]		2	4687.3	1.3	149.2	152.2	86.9	86.1	92	50.4	76.8	160	145.1		Peak Found	High	High	High	Peak Found	High	High	High	High	High	High	7.23e-06	4.554e-10	6.34	78.38	Used	Used	K.TLLFGEKPVSVFGCRNPEEIPWSQTGADFVVESTGVFTDKDK.A	[68-109]
	FALSE	High	[K].TVDGPSAKDWR.[G]		1.2494e-05	5.33751e-05	1	1	72	731333855	731333855 [189-199]		1	1231.61	135.6	123.6	108.1	105.9	74.7	37.3	135.3	79.2	129.5	70.8		High	High	High	High	High	High	High	High	High	High	High	7.23e-06	1.524e-06	3.38	9.64	Used	Used	K.TVDGPSAKDWR.G	[189-199]
	FALSE	High	[K].TVDGPSAKDWR.[G]	1xGG [K8]	0.000133489	9.51359e-05	1	1	5	731333855	731333855 [189-199]		1	1345.65	24	112.5	552	12			180.4	30.4	81.6	6.9		Peak Found	High	High	Peak Found	Not Found	Not Found	Peak Found	Peak Found	Peak Found	Peak Found	High	1.364e-05	1.562e-05	2.06	10.22	Used	Used	K.TVDGPSAKDWR.G	[189-199]
	FALSE	High	[K].TVDGPSAKDWRGGR.[A]		0.000147608	9.51359e-05	1	1	5	731333855	731333855 [189-202]		2	1501.75	437.9	29.4	19	9.4	0.9	24	131.3	196.4	117.7	34.1		High	Peak Found	Peak Found	Peak Found	Peak Found	Peak Found	High	High	High	Peak Found	High	1.696e-05	1.728e-05	2.44	9.41	Used	Used	K.TVDGPSAKDWRGGR.A	[189-202]
	FALSE	High	[K].VKDEKTLLFGEKPVSVFGCR.[N]	1xCarbamidomethyl [C19]	2.08939e-06	5.33751e-05	1	1	4	731333855	731333855 [63-82]		2	2309.23	184.6			504.1	293.2					18		Peak Found	Not Found	Not Found	High	High	Not Found	Not Found	Not Found	Not Found	High	High	7.23e-06	2.653e-07	3.76	27.84	Used	Used	K.VKDEKTLLFGEKPVSVFGCR.N	[63-82]
	FALSE	High	[R].VILQRDDVELVAVNDPFITTDYMTYMFK.[Y]		6.49892e-09	5.33751e-05	1	1	44	731333855	731333855 [21-48]		1	3336.65	38.3	80.8	292.4	127.5	15.5	3.6	114.8	80.5	216.6	29.9		High	High	High	High	Peak Found	Peak Found	High	High	High	High	High	7.23e-06	9.557e-10	6.62	91.25	Used	Used	R.VILQRDDVELVAVNDPFITTDYMTYMFK.Y	[21-48]
	FALSE	High	[R].VILQRDDVELVAVNDPFITTDYMTYMFK.[Y]	1xOxidation [M]	1.98533e-06	5.33751e-05	1	1	5	731333855	731333855 [21-48]		1	3352.65		384.5							143.1	472.4		Not Found	High	Not Found	Not Found	Not Found	Not Found	Not Found	Not Found	High	High	High	7.23e-06	2.525e-07	4.33	78.86	Used	Used	R.VILQRDDVELVAVNDPFITTDYMTYMFK.Y	[21-48]
	FALSE	High	[R].VILQRDDVELVAVNDPFITTDYMTYMFK.[Y]	2xOxidation [M23; M26]	1.42143e-05	5.33751e-05	1	1	1	731333855	731333855 [21-48]		1	3368.64	223.4									776.6		Peak Found	Not Found	Not Found	Not Found	Not Found	Not Found	Not Found	Not Found	Not Found	High	High	7.23e-06	1.726e-06	3.29	69.47	Used	Used	R.VILQRDDVELVAVNDPFITTDYMTYMFK.Y	[21-48]
	FALSE	High	[K].VINDKFGIVEGLMTTVHSITATQK.[T]		1.34574e-13	5.33751e-05	1	1	190	731333855	731333855 [165-188]		1	2602.39	180	178.3	51.4	70.5	71.5	157.1	108.6	81.2	51.9	49.6		High	High	High	High	High	High	High	High	High	High	High	7.23e-06	2.606e-14	8.29	110.68	Used	Used	K.VINDKFGIVEGLMTTVHSITATQK.T	[165-188]
	FALSE	High	[K].VINDKFGIVEGLMTTVHSITATQK.[T]	1xOxidation [M13]	1.97697e-09	5.33751e-05	1	1	59	731333855	731333855 [165-188]		1	2618.39	17.7	63.9	42.6	200.8	374.7	94.8	25.6	22.5	38.7	118.6		High	High	High	High	High	High	High	High	High	High	High	7.23e-06	2.994e-10	6.06	54.64	Used	Used	K.VINDKFGIVEGLMTTVHSITATQK.T	[165-188]
	FALSE	High	[K].VINDKFGIVEGLMTTVHSITATQK.[T]	1xPhospho [T14]; 1xOxidation [M13]; 1xGG [T15]	3.91085e-05	5.33751e-05	1	1	1	731333855	731333855 [165-188]	731333855 1xPhospho [T178]	1	2812.4	85.8	151.4		139.3	129.1	119	152.3	82	71.2	69.9		Peak Found	Peak Found	Not Found	Peak Found	Peak Found	Peak Found	Peak Found	Peak Found	High	Peak Found	High	7.23e-06	4.649e-06	4.64	70.78	Used	Used	K.VINDKFGIVEGLMTTVHSITATQK.T	[165-188]
	FALSE	High	[K].VINDKFGIVEGLMTTVHSITATQKTVDGPSAK.[D]		6.26014e-12	5.33751e-05	1	1	28	731333855	731333855 [165-196]		2	3357.77	468.2	71.3	61.1	29.4	10.9	13.8	70.7	147.9	67.8	59		High	High	Peak Found	High	Peak Found	Peak Found	High	High	High	High	High	7.23e-06	1.097e-12	7.82	110.92	Used	Used	K.VINDKFGIVEGLMTTVHSITATQKTVDGPSAK.D	[165-196]
	FALSE	High	[K].VINDKFGIVEGLMTTVHSITATQKTVDGPSAK.[D]	1xOxidation [M13]	0.0211172	0.00124898	1	1	1	731333855	731333855 [165-196]		2	3373.77				1000								Not Found	Not Found	Not Found	High	Not Found	Not Found	Not Found	Not Found	Not Found	Not Found	High	0.0001913	0.002175	1.76	58.11	Used	Used	K.VINDKFGIVEGLMTTVHSITATQKTVDGPSAK.D	[165-196]
	FALSE	High	[K].VLPALNGK.[L]		0.000468831	0.000126394	1	1	43	731333855	731333855 [222-229]		0	811.504	34.9	21.1	61.9	43.8	58.3	151.7	186.1	81.2	176.3	184.7		High	High	High	High	High	High	High	High	High	High	High	1.859e-05	5.144e-05	1.91	12.17	Used	Used	K.VLPALNGK.L	[222-229]
	FALSE	High	[K].VLPALNGKLTGMAFR.[V]		1.56562e-05	5.33751e-05	1	1	3	731333855	731333855 [222-236]		1	1587.9								269.3	509.7	220.9		High	Not Found	Not Found	Not Found	Not Found	Not Found	Not Found	High	High	Peak Found	High	7.23e-06	1.899e-06	2.76	33.63	Used	Used	K.VLPALNGKLTGMAFR.V	[222-236]
	FALSE	High	[R].VPTVDVSVVDLTVR.[L]		1.88157e-07	5.33751e-05	2	2	128	731333855; 731343396	731333855 [237-250]; 731343396 [239-252]		0	1498.85	47.1	145.2	142.8	78.7	34.1	82.3	106.6	168.3	100	94.9	Shared	High	High	High	High	High	High	High	High	High	High	High	7.23e-06	2.546e-08	3.44	48.38	Used	Used	R.VPTVDVSVVDLTVR.L	[237-250]
	FALSE	High	[R].VPTVDVSVVDLTVRLEK.[AE]		8.80458e-10	5.33751e-05	2	2	125	731333855; 731343396	731333855 [237-253]; 731343396 [239-255]		1	1869.07	188.9	176.7	138.3	68.9	38.2	120.3	58	96.2	89.3	25.3	Shared	High	High	High	High	High	High	High	High	High	High	High	7.23e-06	1.366e-10	4.12	53.62	Used	Used	R.VPTVDVSVVDLTVRLEK.A	[237-253]
	FALSE	High	[R].VVDLIVHMSK.[T]		2.17813e-05	5.33751e-05	1	1	117	731333855	731333855 [326-335]		0	1140.64	120.8	109.9	294.2	108.5	94.9	62.1	44.4	58.9	48	58.4		High	High	High	High	High	High	High	High	High	High	High	7.23e-06	2.625e-06	2.45	10.78	Used	Used	R.VVDLIVHMSK.T	[326-335]
	FALSE	High	[R].VVDLIVHMSK.[T]	1xOxidation [M8]	1.88991e-05	5.33751e-05	1	1	26	731333855	731333855 [326-335]		0	1156.64	112.8	67.1	37.7	58.8	78.8	106.2	106.5	136.8	124.6	170.8		Peak Found	High	High	High	High	High	High	High	High	High	High	7.23e-06	2.276e-06	2.16	18.1	Used	Used	R.VVDLIVHMSK.T	[326-335]
	FALSE	High	[R].VVDLIVHMSKTE.[-]		8.13577e-07	5.33751e-05	1	1	154	731333855	731333855 [326-337]		1	1370.73	168.1	182.9	33.1	101.7	108.6	52.3	65	112.4	86.1	89.7		High	High	High	High	High	High	High	High	High	High	High	7.23e-06	1.058e-07	4.35	24.14	Used	Used	R.VVDLIVHMSKTE.-	[326-337]
	FALSE	High	[R].VVDLIVHMSKTE.[-]	1xOxidation [M8]	2.43045e-05	5.33751e-05	1	1	20	731333855	731333855 [326-337]		1	1386.73	27.4	130.8	6.4	15.2	101.7	79.3	41.4	76.8	90.6	430.4		High	High	High	High	High	High	Peak Found	High	High	High	High	7.23e-06	2.914e-06	2.93	10.58	Used	Used	R.VVDLIVHMSKTE.-	[326-337]
	FALSE	High	[K].VVISAPSK.[D]		0.00239296	0.000222105	2	2	8	731333855; 731343396	731333855 [121-128]; 731343396 [123-130]		0	800.488	25.5	25.6	4.2	5.1	0.1	333.7	179.4	87.2	191	148.3	Shared	Peak Found	High	High	Peak Found	Peak Found	High	High	High	High	Peak Found	High	3.769e-05	0.0002436	1.7	9.71	Used	Used	K.VVISAPSK.D	[121-128]
	FALSE	High	[K].VVISAPSKDAPMFVVGVNEHEYK.[S]		1.95245e-10	5.33751e-05	1	1	58	731333855	731333855 [121-143]		1	2516.29	107.1	114.2	243.8	85.5	95.8	70.8	101.3	59.4	70.3	51.9		High	High	High	High	High	High	High	High	High	High	High	7.23e-06	3.141e-11	6.44	20.66	Used	Used	K.VVISAPSKDAPMFVVGVNEHEYK.S	[121-143]
	FALSE	High	[K].VVISAPSKDAPMFVVGVNEHEYKSDLHIVSNASCTTNCLAPLAK.[V]	2xCarbamidomethyl [C34; C38]	1.84313e-06	5.33751e-05	1	1	17	731333855	731333855 [121-164]		2	4769.37	7.6	160.2	135.3	281.7	0.7	8	101.3	127.2	120.6	57.4		Peak Found	High	Peak Found	High	Peak Found	Peak Found	High	High	High	High	High	7.23e-06	2.353e-07	6.85	107.08	Used	Used	K.VVISAPSKDAPMFVVGVNEHEYKSDLHIVSNASCTTNCLAPLAK.V	[121-164]
	FALSE	High	[K].YDSVHGQWK.[H]		0.000128738	9.51359e-05	1	1	63	731333855	731333855 [49-57]		0	1119.52	19.4	41	94.9	6.8	119.5	188.9	198.5	140.8	158	32.3		Peak Found	High	High	High	High	High	High	High	High	High	High	1.364e-05	1.511e-05	2.03	9.82	Used	Used	K.YDSVHGQWK.H	[49-57]
	FALSE	High	[K].YDSVHGQWKHHELK.[V]		0.000114953	5.33751e-05	1	1	2	731333855	731333855 [49-62]		1	1763.86					32.7	506.7				460.6		Not Found	Not Found	Not Found	Not Found	Peak Found	High	Not Found	Not Found	Not Found	High	High	7.23e-06	1.353e-05	2.74	10.66	Used	Used	K.YDSVHGQWKHHELK.V	[49-62]
FALSE		High	Master Protein	7544846374039703004	4336	731318762	PREDICTED: LOW QUALITY PROTEIN: uncharacterized protein LOC104887018 [Beta vulgaris subsp. vulgaris]	MAGKGEGPAIGIDLGTTYSCVGVWQHDRVEIIANDQGNRTTPSYVAFTDSERLIGDAAKNQVAMNPINTVFDAKRLIGRRFSDASVQADIKLWPFKVIPGPGEKPMIVVNYKGEEKQFAAEEISSMVLTKMKEIAEAYLGSTVKNAVVTVPAYFNDSQRQATKDAGVISGLNVMRIINEPTAAAIAYGLDKKATSVGEKNVLIFDLGGGTFDVSLLTIEEGIFEVKATAGDTHLGGEDFDNRMVNHFVQEFKRKHKKDISGNPRALRRLRTSCERAKRTLSSTAQTTIEIDSLFEGVDFYSPITRARFEELNMDLFRKCMEPVEKCLRDAKMDKSTVHEVVLVGGSTRIPKVQQLLQDFFNGKELCKSINPDEAVAYGAAVQAAILSGEGNEKVQDLLL…	>gi|731318762|ref|XP_010669896.1| PREDICTED: LOW QUALITY PROTEIN: uncharacterized protein LOC104887018 [Beta vulgaris subsp. vulgaris]	0	870.762	56	66	3161	39	41	1526	168.7	5.91	7545.97	56	3161	66	37	118.8	114.3	92.4	106.6	117.4	96	99.1	84.5	78.4	92.4	2.77251e+09	5.42385e+09	2.71121e+09	2.57258e+09	1.08539e+09	3.74981e+09	1.98301e+09	2.38116e+09	2.71229e+09	3.07563e+09	5.63447e+09	5.42385e+09	4.38473e+09	5.05851e+09	5.56834e+09
	Checked	Confidence	Annotated Sequence	Modifications	Qvality PEP	Qvality q-value	# Protein Groups	# Proteins	# PSMs	Master Protein Accessions	Positions in Master Proteins	Modifications in Master Proteins	# Missed Cleavages	Theo. MH+ [Da]	Abundances (Scaled): F1: Control	Abundances (Scaled): F2: Control	Abundances (Scaled): F3: Control	Abundances (Scaled): F4: Control	Abundances (Scaled): F5: Control	Abundances (Scaled): F6: Sample	Abundances (Scaled): F7: Sample	Abundances (Scaled): F8: Sample	Abundances (Scaled): F9: Sample	Abundances (Scaled): F10: Sample	Quan Info	Found in Sample: [S1] F1: Control	Found in Sample: [S2] F2: Control	Found in Sample: [S3] F3: Control	Found in Sample: [S4] F4: Control	Found in Sample: [S5] F5: Control	Found in Sample: [S6] F6: Sample	Found in Sample: [S7] F7: Sample	Found in Sample: [S8] F8: Sample	Found in Sample: [S9] F9: Sample	Found in Sample: [S10] F10: Sample	Confidence (by Search Engine): Sequest HT	Percolator q-Value (by Search Engine): Sequest HT	Percolator PEP (by Search Engine): Sequest HT	XCorr (by Search Engine): Sequest HT	Top Apex RT [min]	Quan Usage	Quan Ratio Usage	Sequence in Protein	Positions in Proteins
	FALSE	High	[R].ARFEELNMDLFR.[K]		1.36273e-06	5.33751e-05	3	3	141	731352584; 731349044; 731318762	731352584 [317-328]; 731349044 [306-317]; 731318762 [306-317]; [1181-1192]		1	1540.76	51.9	71.2	84	128.4	47.8	238.1	156.6	92.9	47.1	81.9	Shared	High	High	High	High	High	High	High	High	High	High	High	7.23e-06	1.749e-07	2.58	47.95	Used	Used	R.ARFEELNMDLFR.K; R.ARFEELNMDLFR.K	[306-317]; [1181-1192]
	FALSE	High	[R].ARFEELNMDLFR.[K]	1xOxidation [M8]	0.000202484	9.51359e-05	3	3	14	731352584; 731349044; 731318762	731352584 [317-328]; 731349044 [306-317]; 731318762 [306-317]; [1181-1192]		1	1556.75	2.3	41.8	31.1	70.1	143.7	267.6	29.2	18.6	20.1	375.7	Shared	Peak Found	Peak Found	High	High	High	High	Peak Found	High	High	High	High	1.696e-05	2.327e-05	2.13	33.67	Used	Used	R.ARFEELNMDLFR.K; R.ARFEELNMDLFR.K	[306-317]; [1181-1192]
	FALSE	High	[R].ARFEELNMDLFRK.[C]		3.44319e-07	5.33751e-05	3	3	258	731352584; 731349044; 731318762	731352584 [317-329]; 731349044 [306-318]; 731318762 [306-318]; [1181-1193]		2	1668.85	74.3	85.3	97.4	155.4	92.6	132.3	156.8	97.2	41.9	66.7	Shared	High	High	High	High	High	High	High	High	High	High	High	7.23e-06	4.591e-08	3.52	34.05	Used	Used	R.ARFEELNMDLFRK.C; R.ARFEELNMDLFRK.C	[306-318]; [1181-1193]
	FALSE	High	[R].ARFEELNMDLFRK.[C]	1xOxidation [M8]	7.66965e-05	5.33751e-05	3	3	39	731352584; 731349044; 731318762	731352584 [317-329]; 731349044 [306-318]; 731318762 [306-318]; [1181-1193]		2	1684.85	11.2	11.8	42	41	103.4	240.5	169.2	50	97.1	233.8	Shared	Peak Found	High	High	High	High	High	High	Peak Found	High	High	High	7.23e-06	9.034e-06	4.55	30.21	Used	Used	R.ARFEELNMDLFRK.C; R.ARFEELNMDLFRK.C	[306-318]; [1181-1193]
	FALSE	High	[K].ATAGDTHLGGEDFDNR.[ML]		6.74517e-09	5.33751e-05	3	3	65	731349044; 731318762; 731310842	731349044 [227-242]; 731318762 [227-242]; [1102-1117]; 731310842 [226-241]		0	1675.73	59.5	88.9	71.9	78.9	104.7	118	108.4	73	123.6	173.2	Shared	High	High	High	High	High	High	High	High	High	High	High	7.23e-06	9.934e-10	4.38	10.92	Used	Used	K.ATAGDTHLGGEDFDNR.M; K.ATAGDTHLGGEDFDNR.M	[227-242]; [1102-1117]
	FALSE	High	[K].ATAGDTHLGGEDFDNRMVNHFVQEFK.[R]		8.43775e-06	5.33751e-05	2	2	10	731349044; 731318762	731349044 [227-252]; 731318762 [227-252]; [1102-1127]		1	2935.34	344.4	228.2		223	60		104.4		1.3	38.6	Shared	High	High	Not Found	High	Peak Found	Not Found	High	Not Found	Peak Found	Peak Found	High	7.23e-06	1.035e-06	3.52	47.73	Used	Used	K.ATAGDTHLGGEDFDNRMVNHFVQEFK.R; K.ATAGDTHLGGEDFDNRMVNHFVQEFK.R	[227-252]; [1102-1127]
	FALSE	High	[K].ATAGDTHLGGEDFDNRMVNHFVQEFKR.[K]		8.69739e-08	5.33751e-05	2	2	12	731349044; 731318762	731349044 [227-253]; 731318762 [227-253]; [1102-1128]		2	3091.44	415.2			204.6	257.6		107.1			15.5	Shared	High	Not Found	Not Found	High	High	Not Found	High	Not Found	Not Found	Peak Found	High	7.23e-06	1.197e-08	4.73	46.1	Used	Used	K.ATAGDTHLGGEDFDNRMVNHFVQEFKR.K; K.ATAGDTHLGGEDFDNRMVNHFVQEFKR.K	[227-253]; [1102-1128]
	FALSE	High	[K].DAGVIAGLNVMR.[I]		1.24365e-05	5.33751e-05	1	1	63	731318762	731318762 [1039-1050]		0	1215.65	184.3	178.3	42.9	102.2	87.1	52.9	60.4	115.3	103.4	73.3		High	High	High	Peak Found	High	High	High	High	High	High	High	7.23e-06	1.514e-06	3.04	41.06	Used	Used	K.DAGVIAGLNVMR.I	[1039-1050]
	FALSE	High	[K].DAGVIAGLNVMR.[I]	1xOxidation [M11]	3.87586e-05	5.33751e-05	1	1	8	731318762	731318762 [1039-1050]		0	1231.65	1.3	24.6	5.3	46.5	64.3	176.7	161.4	16.3	229.2	274.4		Peak Found	High	Peak Found	Peak Found	High	High	High	Peak Found	Peak Found	High	High	7.23e-06	4.604e-06	2.29	31.66	Used	Used	K.DAGVIAGLNVMR.I	[1039-1050]
	FALSE	High	[K].DAGVISGLNVMR.[I]		1.37634e-05	5.33751e-05	2	3	42	731349044; 731318762	731349044 [164-175]; 731318762 [164-175]		0	1231.65	239	134.3	28	87.1	92.2	71.7	86.6	100.8	91.6	68.5	Shared	High	High	High	High	High	High	High	High	High	High	High	7.23e-06	1.672e-06	2.75	34.38	Used	Used	K.DAGVISGLNVMR.I	[164-175]
	FALSE	High	[K].DAGVISGLNVMR.[I]	1xOxidation [M11]	0.0236366	0.00150095	2	3	5	731349044; 731318762	731349044 [164-175]; 731318762 [164-175]		0	1247.64	6.6	260.3	13.1	69.1	127.5	59.2	57.8	215.7	83.6	107	Shared	Peak Found	Peak Found	Peak Found	High	High	Peak Found	Peak Found	High	Peak Found	High	High	0.0002233	0.00243	1.45	22.92	Used	Used	K.DAGVISGLNVMR.I	[164-175]
	FALSE	High	[R].DAKMDKSTVHDVVLVGGSTR.[I]		6.3917e-06	5.33751e-05	1	1	3	731318762	731318762 [1204-1223]		2	2115.09	232.7	55.7		503.2	100			108.4				High	Peak Found	Not Found	High	Peak Found	Not Found	Not Found	Peak Found	Not Found	Not Found	High	7.23e-06	7.926e-07	3.19	12.31	Used	Used	R.DAKMDKSTVHDVVLVGGSTR.I	[1204-1223]
	FALSE	High	[R].DAKMDKSTVHDVVLVGGSTR.[I]	1xGG [K3]	2.73604e-05	5.33751e-05	1	1	1	731318762	731318762 [1204-1223]		2	2229.13			819.2			180.8						Not Found	Not Found	High	Not Found	Not Found	Peak Found	Not Found	Not Found	Not Found	Not Found	High	7.23e-06	3.283e-06	2.97	11.59	Used	Used	R.DAKMDKSTVHDVVLVGGSTR.I	[1204-1223]
	FALSE	High	[R].DAKMDKSTVHEVVLVGGSTR.[I]		3.68873e-05	5.33751e-05	1	1	3	731318762	731318762 [329-348]		2	2129.1	708.2	47.2		45	173.8	3.2	2.2	5.5	5.5	9.4		High	Peak Found	Not Found	Peak Found	Peak Found	Peak Found	Peak Found	Peak Found	Peak Found	Peak Found	High	7.23e-06	4.4e-06	3.31	13.33	Used	Used	R.DAKMDKSTVHEVVLVGGSTR.I	[329-348]
	FALSE	High	[R].DAKMDKSTVHEVVLVGGSTR.[I]	1xGG [K3]	0.0001488	9.51359e-05	1	1	1	731318762	731318762 [329-348]		2	2243.14		60.3	252.7			185.9	65.9	63.8	51.5	319.9		Not Found	Peak Found	High	Not Found	Not Found	Peak Found	Peak Found	Peak Found	Peak Found	Peak Found	High	1.696e-05	1.735e-05	2.38	11.62	Used	Used	R.DAKMDKSTVHEVVLVGGSTR.I	[329-348]
	FALSE	High	[K].ELESICNPIIAK.[M]	1xCarbamidomethyl [C6]	0.000599057	0.000126394	1	1	3	731318762	731318762 [604-615]		0	1386.73	52.6	139.8	2.4	24.9	55.1	243	128.8	145.6	98.6	109.3		Peak Found	High	Peak Found	Peak Found	Peak Found	High	Peak Found	Peak Found	Peak Found	Peak Found	High	1.859e-05	6.506e-05	1.84	28.11	Used	Used	K.ELESICNPIIAK.M	[604-615]
	FALSE	High	[K].EQVFSTYSDNQPGVLIQVYEGER.[T]		3.02932e-06	5.33751e-05	1	1	101	731318762	731318762 [431-453]; [1306-1328]		0	2658.27	226	170.7	58.5	96.8	85.9	57.4	62.8	112.4	73.8	55.7		High	High	High	High	High	High	High	High	High	High	High	7.23e-06	3.814e-07	3.23	61.28	Used	Used	K.EQVFSTYSDNQPGVLIQVYEGER.T; K.EQVFSTYSDNQPGVLIQVYEGER.T	[431-453]; [1306-1328]
	FALSE	High	[K].EQVFSTYSDNQPGVLIQVYEGERTR.[T]		8.36582e-07	5.33751e-05	1	1	35	731318762	731318762 [431-455]; [1306-1330]		1	2915.42	460.6	216.3	5.8	95.6	87.6	12.4	11.5	45.9	37	27.3		High	High	High	High	High	Peak Found	High	High	High	High	High	7.23e-06	1.087e-07	3.47	51.95	Used	Used	K.EQVFSTYSDNQPGVLIQVYEGERTR.T; K.EQVFSTYSDNQPGVLIQVYEGERTR.T	[431-455]; [1306-1330]
	FALSE	High	[R].FEELNMDLFR.[K]		1.03405e-05	5.33751e-05	3	3	34	731352584; 731349044; 731318762	731352584 [319-328]; 731349044 [308-317]; 731318762 [308-317]; [1183-1192]		0	1313.62	59.9	155.5	94.6	151.3	44.1	105.1	103	116.8	77.5	92.3	Shared	High	High	High	High	High	High	High	High	High	High	High	7.23e-06	1.266e-06	2.13	57.86	Used	Used	R.FEELNMDLFR.K; R.FEELNMDLFR.K	[308-317]; [1183-1192]
	FALSE	High	[R].FEELNMDLFR.[K]	1xOxidation [M6]	0.00166812	0.000154279	3	3	1	731352584; 731349044; 731318762	731352584 [319-328]; 731349044 [308-317]; 731318762 [308-317]; [1183-1192]		0	1329.61	307.5	4.8		162	146.1		16.7		43.8	319.1	Shared	Peak Found	Peak Found	Not Found	Peak Found	Peak Found	Not Found	Peak Found	Not Found	Peak Found	High	High	2.424e-05	0.0001724	1.75	35.6	Used	Used	R.FEELNMDLFR.K; R.FEELNMDLFR.K	[308-317]; [1183-1192]
	FALSE	High	[R].FEELNMDLFRK.[C]		4.53352e-05	5.33751e-05	3	3	49	731352584; 731349044; 731318762	731352584 [319-329]; 731349044 [308-318]; 731318762 [308-318]; [1183-1193]		1	1441.71	53.9	105.4	50.8	93.1	234.9	143.6	78.1	97.5	74.5	68.2	Shared	High	High	High	High	High	High	High	High	High	High	High	7.23e-06	5.381e-06	2.57	41.8	Used	Used	R.FEELNMDLFRK.C; R.FEELNMDLFRK.C	[308-318]; [1183-1193]
	FALSE	High	[R].FSDASVQADIK.[L]		1.96949e-05	5.33751e-05	1	1	14	731318762	731318762 [81-91]		0	1180.58	11.4	119.3	4.8	25.9	35.8	137.3	127.8	190.3	144.9	202.4		Peak Found	High	Peak Found	High	High	High	High	High	High	High	High	7.23e-06	2.376e-06	2.76	15.78	Used	Used	R.FSDASVQADIK.L	[81-91]
	FALSE	High	[R].FSDASVQADIKLWPFK.[V]		2.48651e-05	5.33751e-05	1	1	13	731318762	731318762 [81-96]		1	1851.96	99.7	67.7	318.2	54.7	2.6	162.4	79.8	57.5	103	54.3		High	High	High	High	Peak Found	High	High	Peak Found	High	High	High	7.23e-06	2.985e-06	3.89	59.65	Used	Used	R.FSDASVQADIKLWPFK.V	[81-96]
	FALSE	High	[K].KEQVFSTYSDNQPGVLIQVYEGER.[T]		1.58008e-05	5.33751e-05	1	1	9	731318762	731318762 [430-453]; [1305-1328]		1	2786.36		287.5	104.9	58.3	7.4	179.9	212.3	85.2	24.8	39.7		Not Found	High	High	High	Peak Found	High	High	Peak Found	High	High	High	7.23e-06	1.911e-06	3.08	97.04	Used	Used	K.KEQVFSTYSDNQPGVLIQVYEGER.T; K.KEQVFSTYSDNQPGVLIQVYEGER.T	[430-453]; [1305-1328]
	FALSE	High	[K].IEEAIDNAIQWLDSNQLAEADEFDDKMKELEGICNPIIAK.[M]	1xCarbamidomethyl [C34]	0.000233063	9.51359e-05	1	1	1	731318762	731318762 [1451-1490]		2	4589.21		99.4	181.1					434.3		285.2		Not Found	Peak Found	High	Not Found	Not Found	Not Found	Not Found	Peak Found	Not Found	Peak Found	High	1.696e-05	2.662e-05	3.69	99.38	Used	Used	K.IEEAIDNAIQWLDSNQLAEADEFDDKMKELEGICNPIIAK.M	[1451-1490]
	FALSE	High	[R].LIGDAAKNQVAMNPINTVFDAK.[R]		5.08781e-07	5.33751e-05	1	1	19	731318762	731318762 [53-74]		1	2330.22	506.4	197.4		77.9	84.5	6.9	36.2	25	44.8	21.1		High	High	Not Found	High	High	Peak Found	High	High	High	Peak Found	High	7.23e-06	6.72e-08	4.6	45.82	Used	Used	R.LIGDAAKNQVAMNPINTVFDAK.R	[53-74]
	FALSE	High	[R].LIGDAAKNQVAMNPINTVFDAKR.[L]		5.27218e-09	5.33751e-05	1	1	20	731318762	731318762 [53-75]		2	2486.32	401.8	117.4	1.6	224.7	37.1	2.4	31.5	91.7	51.8	40		High	High	Peak Found	High	High	Peak Found	High	High	High	High	High	7.23e-06	7.785e-10	4.6	37.22	Used	Used	R.LIGDAAKNQVAMNPINTVFDAKR.L	[53-75]
	FALSE	High	[R].LIGDAAKNQVAMNPINTVFDAKR.[L]	1xOxidation [M12]	0.0513364	0.0029417	1	1	1	731318762	731318762 [53-75]		2	2502.31					1000							Not Found	Not Found	Not Found	Not Found	High	Not Found	Not Found	Not Found	Not Found	Not Found	High	0.0004282	0.005287	1.03	27.78	Used	Used	R.LIGDAAKNQVAMNPINTVFDAKR.L	[53-75]
	FALSE	High	[R].IINEPTAAAIAYGLDK.[KRM]		4.57196e-07	5.33751e-05	6	9	83	731352584; 731321538; 731313035; 731349044; 731318762; 731310842	731352584 [187-202]; 731321538 [204-219]; 731313035 [178-193]; 731349044 [176-191]; 731318762 [176-191]; [1051-1066]; 731310842 [174-189]		0	1659.9	150.6	203.4	21.6	49.5	103.5	99.6	64.1	113	95.2	99.5	Shared	High	High	High	High	High	High	High	High	High	High	High	7.23e-06	6.032e-08	4.07	43.91	Used	Used	R.IINEPTAAAIAYGLDK.K; R.IINEPTAAAIAYGLDK.K	[176-191]; [1051-1066]
	FALSE	High	[R].IINEPTAAAIAYGLDKK.[AGS]		1.15124e-08	5.33751e-05	5	7	269	731352584; 731313035; 731349044; 731318762; 731310842	731352584 [187-203]; 731313035 [178-194]; 731349044 [176-192]; 731318762 [176-192]; [1051-1067]; 731310842 [174-190]		1	1787.99	140.3	166.7	113.8	95.7	116.5	78.5	73.3	51.7	69.7	93.7	Shared	High	High	High	High	High	High	High	High	High	High	High	7.23e-06	1.667e-09	3.96	33.45	Used	Used	R.IINEPTAAAIAYGLDKK.A; R.IINEPTAAAIAYGLDKK.A	[176-192]; [1051-1067]
	FALSE	High	[R].IINEPTAAAIAYGLDKK.[AGS]	1xGG [K]	3.06544e-07	5.33751e-05	5	7	13	731352584; 731313035; 731349044; 731318762; 731310842	731352584 [187-203]; 731313035 [178-194]; 731349044 [176-192]; 731318762 [176-192]; [1051-1067]; 731310842 [174-190]		1	1902.03		72.8	190.4	30.8	22.5	225.7	90.6	52.1	118.4	196.6	Shared	Not Found	High	High	High	Peak Found	High	High	High	High	High	High	7.23e-06	4.096e-08	4.19	27.55	Used	Used	R.IINEPTAAAIAYGLDKK.A; R.IINEPTAAAIAYGLDKK.A	[176-192]; [1051-1067]
	FALSE	High	[R].IINEPTAAAIAYGLDKKATSVGEK.[N]		3.3863e-06	5.33751e-05	1	2	2	731318762	731318762 [176-199]; [1051-1074]		2	2460.33	284.6		73.3	565.3	76.8							High	Not Found	Peak Found	High	Peak Found	Not Found	Not Found	Not Found	Not Found	Not Found	High	7.23e-06	4.251e-07	4.12	39.18	Used	Used	R.IINEPTAAAIAYGLDKKATSVGEK.N; R.IINEPTAAAIAYGLDKKATSVGEK.N	[176-199]; [1051-1074]
	FALSE	High	[R].IINEPTAAAIAYGLDKKATSVGEK.[N]	1xGG [K/S/T]	0.00684858	0.000491899	1	2	4	731318762	731318762 [176-199]; [1051-1074]		2	2574.38											No Quan Values	Not Found	High	Not Found	Not Found	Not Found	Not Found	Not Found	Not Found	Not Found	Not Found	High	7.255e-05	0.0006965	1.31		Not Used	Not Used	R.IINEPTAAAIAYGLDKKATSVGEK.N; R.IINEPTAAAIAYGLDKKATSVGEK.N	[176-199]; [1051-1074]
	FALSE	High	[R].IPKVQQLLQDFFNGKELCK.[S]	1xCarbamidomethyl [C18]	5.34288e-05	5.33751e-05	3	3	7	731349044; 731318762; 731310842	731349044 [349-367]; 731318762 [349-367]; [1224-1242]; 731310842 [348-366]		2	2305.24	12	78.1		405.2	78.2	19.8	192.8	50.4	130	33.6	Shared	Peak Found	Peak Found	Not Found	High	Peak Found	Peak Found	High	Peak Found	High	High	High	7.23e-06	6.319e-06	2.68	110.72	Used	Used	R.IPKVQQLLQDFFNGKELCK.S; R.IPKVQQLLQDFFNGKELCK.S	[349-367]; [1224-1242]
	FALSE	High	[R].LSKDEIEKMVQEAEK.[Y]		2.26959e-05	5.33751e-05	1	1	2	731318762	731318762 [516-530]		2	1776.9	32.9	19.5		340.6	247.9	6.1	3.7	132.9	214.7	1.7		High	High	Not Found	Peak Found	Peak Found	Peak Found	Peak Found	Peak Found	Peak Found	Peak Found	High	7.23e-06	2.728e-06	3.13	40.51	Used	Used	R.LSKDEIEKMVQEAEK.Y	[516-530]
	FALSE	High	[R].LSKEEIEKMVQEAEK.[Y]		6.79766e-05	5.33751e-05	1	1	3	731318762	731318762 [1391-1405]		2	1790.92	652.6	33.9				291.5		22				High	Peak Found	Not Found	Not Found	Not Found	High	Not Found	Peak Found	Not Found	Not Found	High	7.23e-06	8.02e-06	2.92	39.84	Used	Used	R.LSKEEIEKMVQEAEK.Y	[1391-1405]
	FALSE	High	[K].ITITNDKGR.[L]	1xGG [K7]	0.000528654	0.000126394	5	5	3	731352584; 731321538; 731349044; 731318762; 731310842	731352584 [518-526]; 731321538 [532-540]; 731349044 [507-515]; 731318762 [507-515]; [1382-1390]; 731310842 [506-514]		1	1131.61	247.6		161.3				214.1	5		372	Shared	High	Not Found	Peak Found	Not Found	Not Found	Not Found	Peak Found	Peak Found	Not Found	Peak Found	High	1.859e-05	5.789e-05	1.44	10.21	Used	Used	K.ITITNDKGR.L; K.ITITNDKGR.L	[507-515]; [1382-1390]
	FALSE	High	[-].MAGKGEGPAIGIDLGTTYSCVGVWQHDRVEIIANDQGNR.[T]	1xCarbamidomethyl [C20]; 1xMet-loss+Acetyl [N-Term]	1.97406e-08	5.33751e-05	1	1	3	731318762	731318762 [1-39]	731318762 1xMet-loss+Acetyl [N-Term]	2	4095.99	106.9		323.6					363.6	206			Peak Found	Not Found	High	Not Found	Not Found	Not Found	Not Found	High	Peak Found	Not Found	High	7.23e-06	2.821e-09	5.68	100.74	Used	Used	-.MAGKGEGPAIGIDLGTTYSCVGVWQHDRVEIIANDQGNR.T	[1-39]
	FALSE	High	[K].MDKSTVHDVVLVGGSTR.[I]		6.6209e-09	5.33751e-05	1	1	71	731318762	731318762 [1207-1223]		1	1800.93	98	149.1	142.9	124.3	149.9	52.7	70.4	60.6	70.4	81.7		High	High	High	High	High	High	High	High	High	High	High	7.23e-06	9.761e-10	3.94	10.65	Used	Used	K.MDKSTVHDVVLVGGSTR.I	[1207-1223]
	FALSE	High	[K].MDKSTVHDVVLVGGSTR.[I]	1xOxidation [M1]	6.06961e-05	5.33751e-05	1	1	7	731318762	731318762 [1207-1223]		1	1816.92	83.6		26.5	10.8	32.1	59.3	77.7	26.6	28.2	655.1		High	High	Peak Found	Peak Found	Peak Found	Peak Found	High	High	Peak Found	High	High	7.23e-06	7.173e-06	3.33	9.66	Used	Used	K.MDKSTVHDVVLVGGSTR.I	[1207-1223]
	FALSE	High	[K].MDKSTVHDVVLVGGSTRIPK.[V]		3.53073e-06	5.33751e-05	1	1	3	731318762	731318762 [1207-1226]		2	2139.16	998.1				1.9							High	Not Found	Not Found	Not Found	Peak Found	Not Found	Not Found	Not Found	Not Found	Not Found	High	7.23e-06	4.436e-07	3.02	18.86	Used	Used	K.MDKSTVHDVVLVGGSTRIPK.V	[1207-1226]
	FALSE	High	[K].MDKSTVHEVVLVGGSTR.[I]		1.12312e-07	5.33751e-05	1	1	41	731318762	731318762 [332-348]		1	1814.94	218.6	70.6	142.7	88.8	147.2	30.6	57.3	70.8	83.1	90.3		High	High	High	High	Peak Found	High	High	High	High	High	High	7.23e-06	1.537e-08	4.98	9.44	Used	Used	K.MDKSTVHEVVLVGGSTR.I	[332-348]
	FALSE	High	[K].MDKSTVHEVVLVGGSTRIPK.[V]		0.00299868	0.000222105	1	1	3	731318762	731318762 [332-351]		2	2153.17	860.9		7.4	131.7								High	Not Found	Peak Found	Peak Found	Not Found	Not Found	Not Found	Not Found	Not Found	Not Found	High	3.769e-05	0.0003037	2.87	18.77	Used	Used	K.MDKSTVHEVVLVGGSTRIPK.V	[332-351]
	FALSE	High	[K].MKEIADAFLGITVK.[N]		1.35746e-05	5.33751e-05	1	1	11	731318762	731318762 [1006-1019]		1	1535.85	71.6	69.8	18.1	24.7	82.3	312.4	106.1	132.5	74.9	107.7		Peak Found	High	Peak Found	Peak Found	High	High	High	High	High	High	High	7.23e-06	1.647e-06	2.25	45.72	Used	Used	K.MKEIADAFLGITVK.N	[1006-1019]
	FALSE	High	[K].MKEIADAFLGITVK.[N]	1xOxidation [M1]	0.0108765	0.000853352	1	1	1	731318762	731318762 [1006-1019]		1	1551.85					18.4					981.6		Not Found	Not Found	Not Found	Not Found	Peak Found	Not Found	Not Found	Not Found	Not Found	High	High	0.0001163	0.001111	2.66	33.39	Used	Used	K.MKEIADAFLGITVK.N	[1006-1019]
	FALSE	High	[K].MKEIAEAYLGSTVK.[N]		2.89191e-06	5.33751e-05	1	1	28	731318762	731318762 [131-144]		1	1539.81	36	96.3	70.3	56.9	110.5	176.4	141.4	91.3	78.7	142.3		High	High	High	Peak Found	High	High	High	High	High	High	High	7.23e-06	3.651e-07	2.39	17.52	Used	Used	K.MKEIAEAYLGSTVK.N	[131-144]
	FALSE	High	[K].MKEIAEAYLGSTVK.[N]	1xOxidation [M1]	1.34501e-05	5.33751e-05	1	1	1	731318762	731318762 [131-144]		1	1555.8										1000		Not Found	Not Found	Not Found	Not Found	Not Found	Not Found	Not Found	Not Found	Not Found	High	High	7.23e-06	1.633e-06	2.79	13.95	Used	Used	K.MKEIAEAYLGSTVK.N	[131-144]
	FALSE	High	[R].MVNHFVQEFK.[R]		7.07719e-06	5.33751e-05	2	2	171	731349044; 731318762	731349044 [243-252]; 731318762 [243-252]; [1118-1127]		0	1278.63	146.6	56	166.4	150.3	176.3	59.6	63.4	65.6	64.9	50.8	Shared	High	High	High	High	High	High	High	High	High	High	High	7.23e-06	8.732e-07	2.51	11.48	Used	Used	R.MVNHFVQEFK.R; R.MVNHFVQEFK.R	[243-252]; [1118-1127]
	FALSE	High	[R].MVNHFVQEFK.[R]	1xOxidation [M1]	0.000100009	5.33751e-05	2	2	8	731349044; 731318762	731349044 [243-252]; 731318762 [243-252]; [1118-1127]		0	1294.62	36.7	29.1	186.7	51	165.2	18.4	1.9	18.6	5.5	487	Shared	High	Peak Found	Peak Found	High	High	Peak Found	Peak Found	High	Peak Found	High	High	7.23e-06	1.174e-05	1.83	10.1	Used	Used	R.MVNHFVQEFK.R; R.MVNHFVQEFK.R	[243-252]; [1118-1127]
	FALSE	High	[R].MVNHFVQEFKR.[K]		1.07792e-05	5.33751e-05	2	2	183	731349044; 731318762	731349044 [243-253]; 731318762 [243-253]; [1118-1128]		1	1434.73	63.7	69	53.2	124	286.3	88.3	103.8	66.8	82.5	62.3	Shared	High	High	High	High	High	High	High	High	High	High	High	7.23e-06	1.318e-06	3.07	13.47	Used	Used	R.MVNHFVQEFKR.K; R.MVNHFVQEFKR.K	[243-253]; [1118-1128]
	FALSE	High	[R].MVNHFVQEFKR.[K]	1xOxidation [M1]	3.85848e-05	5.33751e-05	2	2	9	731349044; 731318762	731349044 [243-253]; 731318762 [243-253]; [1118-1128]		1	1450.73	55.6	44.9	90.6	34.5	51.1	83.9	86.2	38.8	27.7	486.5	Shared	Peak Found	Peak Found	Peak Found	Peak Found	Peak Found	High	High	Peak Found	Peak Found	High	High	7.23e-06	4.592e-06	3.52	11.14	Used	Used	R.MVNHFVQEFKR.K; R.MVNHFVQEFKR.K	[243-253]; [1118-1128]
	FALSE	High	[R].MVNHFVQEFKR.[K]	1xGG [K10]	0.000116835	5.33751e-05	2	2	13	731349044; 731318762	731349044 [243-253]; 731318762 [243-253]; [1118-1128]		1	1548.77	14.1	90.9	456.4	22	18.2	94.2	112.5	32.9	88.9	70	Shared	High	High	High	High	Peak Found	Peak Found	Peak Found	High	Peak Found	Peak Found	High	7.23e-06	1.371e-05	3.19	11.06	Used	Used	R.MVNHFVQEFKR.K; R.MVNHFVQEFKR.K	[243-253]; [1118-1128]
	FALSE	High	[R].MVNHFVQEFKR.[K]	1xOxidation [M1]; 1xGG [K10]	0.0269314	0.001684	2	2	1	731349044; 731318762	731349044 [243-253]; 731318762 [243-253]; [1118-1128]		1	1564.77		2	15.6	45.8	50.9	208.5	273.7	55	150.6	197.8	Shared	Not Found	Peak Found	High	Peak Found	Peak Found	Peak Found	Peak Found	Peak Found	Peak Found	Peak Found	High	0.0002432	0.002763	1.99	11.8	Used	Used	R.MVNHFVQEFKR.K; R.MVNHFVQEFKR.K	[243-253]; [1118-1128]
	FALSE	High	[R].MVNHFVQEFKRK.[H]		5.60845e-05	5.33751e-05	2	2	6	731349044; 731318762	731349044 [243-254]; 731318762 [243-254]; [1118-1129]		2	1562.83	355.8			486.9	34.6	34.5	17.5	9.4	35.4	25.8	Shared	High	Not Found	Not Found	High	Peak Found	Peak Found	Peak Found	Peak Found	Peak Found	Peak Found	High	7.23e-06	6.642e-06	2.8	11.63	Used	Used	R.MVNHFVQEFKRK.H; R.MVNHFVQEFKRK.H	[243-254]; [1118-1129]
	FALSE	High	[K].MYQGAGGEGGVPMDDDVPSAGASSGAGAGPK.[I]		2.03629e-07	5.33751e-05	1	1	15	731318762	731318762 [1491-1521]		0	2793.21	112.9	177.6	16.7	21.7	43.2	56.5	172.5	108.6	175.1	115.2		High	High	Peak Found	High	High	High	High	High	High	High	High	7.23e-06	2.752e-08	2.96	24.7	Used	Used	K.MYQGAGGEGGVPMDDDVPSAGASSGAGAGPK.I	[1491-1521]
	FALSE	High	[K].MYQGAGGEGGVPMDDDVPSAGASSGAGAGPKIEEVD.[-]		2.17858e-06	5.33751e-05	1	1	15	731318762	731318762 [1491-1526]		1	3378.47	209.9	225		48.3	65.7	38.4	40.3	149.2	127.5	95.6		High	High	Not Found	High	High	High	Peak Found	High	High	High	High	7.23e-06	2.771e-07	3.33	34.19	Used	Used	K.MYQGAGGEGGVPMDDDVPSAGASSGAGAGPKIEEVD.-	[1491-1526]
	FALSE	High	[K].MYQGAGGEGGVPMDDDVPSAGASSGAGAGPKIEEVD.[-]	2xOxidation [M1; M13]	0.018237	0.001191	1	1	1	731318762	731318762 [1491-1526]		1	3410.46										1000		Not Found	Not Found	Not Found	Not Found	Not Found	Not Found	Not Found	Not Found	Not Found	High	High	0.0001779	0.00188	0.96	20.09	Used	Used	K.MYQGAGGEGGVPMDDDVPSAGASSGAGAGPKIEEVD.-	[1491-1526]
	FALSE	High	[K].NALENYAYNMR.[N]		1.27265e-05	5.33751e-05	2	2	187	731349044; 731318762	731349044 [546-556]; 731318762 [546-556]; [1421-1431]		0	1358.62	89.1	98.6	183.9	87.4	103.1	59.1	96.1	132	69	81.6	Shared	High	High	High	High	High	High	High	High	High	High	High	7.23e-06	1.547e-06	2.52	29.52	Used	Used	K.NALENYAYNMR.N; K.NALENYAYNMR.N	[546-556]; [1421-1431]
	FALSE	High	[K].NALENYAYNMR.[N]	1xOxidation [M10]	6.8866e-05	5.33751e-05	2	2	19	731349044; 731318762	731349044 [546-556]; 731318762 [546-556]; [1421-1431]		0	1374.61	106	51.9	46.6	54.2	64	56	75.3	44.2	67.3	434.5	Shared	High	High	Peak Found	High	High	High	High	High	High	High	High	7.23e-06	8.131e-06	2.22	16.51	Used	Used	K.NALENYAYNMR.N; K.NALENYAYNMR.N	[546-556]; [1421-1431]
	FALSE	High	[K].NAVVTVPAYFNDSQR.[Q]		2.89913e-07	5.33751e-05	3	7	81	731349044; 731318762; 731310842	731349044 [145-159]; 731318762 [145-159]; [1020-1034]; 731310842 [143-157]		0	1680.83	89	167.3	27	44.8	64	137	82	88.5	116.4	184	Shared	High	High	High	High	High	High	High	High	High	High	High	7.23e-06	3.868e-08	2.74	33.88	Used	Used	K.NAVVTVPAYFNDSQR.Q; K.NAVVTVPAYFNDSQR.Q	[145-159]; [1020-1034]
	FALSE	High	[K].NKITITNDKGR.[L]		0.000332713	0.000126394	4	4	1	731352584; 731349044; 731318762; 731310842	731352584 [516-526]; 731349044 [505-515]; 731318762 [505-515]; [1380-1390]; 731310842 [504-514]		2	1259.71	423				232.9		36	215.4	92.7		Shared	High	Not Found	Not Found	Not Found	Peak Found	Not Found	Peak Found	Peak Found	Peak Found	Not Found	High	1.859e-05	3.724e-05	1.59	8.38	Used	Used	K.NKITITNDKGR.L; K.NKITITNDKGR.L	[505-515]; [1380-1390]
	FALSE	High	[K].NQVAMNPINTVFDAK.[R]		9.22343e-07	5.33751e-05	1	1	75	731318762	731318762 [60-74]		0	1661.83	145.2	133	48.9	59.4	107.7	126.3	78.9	85.9	130.8	83.8		High	High	High	High	High	High	High	High	High	High	High	7.23e-06	1.195e-07	3.27	43.24	Used	Used	K.NQVAMNPINTVFDAK.R	[60-74]
	FALSE	High	[K].NQVAMNPINTVFDAK.[R]	1xOxidation [M5]	1.6094e-05	5.33751e-05	1	1	8	731318762	731318762 [60-74]		0	1677.83		8.1	12.9	461.6	99.8	26.9	32.7	6.7	11.6	339.7		Not Found	High	Peak Found	High	High	High	Peak Found	Peak Found	Peak Found	High	High	7.23e-06	1.945e-06	3.13	25.85	Used	Used	K.NQVAMNPINTVFDAK.R	[60-74]
	FALSE	High	[K].NQVAMNPINTVFDAKR.[L]		1.902e-08	5.33751e-05	1	1	107	731318762	731318762 [60-75]		1	1817.93	232.3	148.5	97.5	110.8	78.1	59.8	77.3	58.4	90	47.3		High	High	High	High	High	High	High	High	High	High	High	7.23e-06	2.728e-09	4.94	32.66	Used	Used	K.NQVAMNPINTVFDAKR.L	[60-75]
	FALSE	High	[K].NQVAMNPINTVFDAKR.[L]	1xOxidation [M5]	1.39476e-06	5.33751e-05	1	1	6	731318762	731318762 [60-75]		1	1833.93	12.7	38.8	25.4	49.9	175.5	51.7	11.9		110.2	524.1		High	High	Peak Found	Peak Found	Peak Found	Peak Found	High	Not Found	Peak Found	High	High	7.23e-06	1.796e-07	4.86	18.41	Used	Used	K.NQVAMNPINTVFDAKR.L	[60-75]
	FALSE	High	[R].NTTIPTKKEQVFSTYSDNQPGVLIQVYEGER.[T]		1.26097e-05	5.33751e-05	1	1	28	731318762	731318762 [423-453]; [1298-1328]		2	3541.78	307.9	84.3	3.5	162.7	300.3	6.2	40	42.5	32	20.5		High	High	Peak Found	High	High	Peak Found	High	High	High	High	High	7.23e-06	1.539e-06	4.22	44.5	Used	Used	R.NTTIPTKKEQVFSTYSDNQPGVLIQVYEGER.T; R.NTTIPTKKEQVFSTYSDNQPGVLIQVYEGER.T	[423-453]; [1298-1328]
	FALSE	High	[R].QATKDAGVIAGLNVMR.[I]		1.80081e-06	5.33751e-05	1	1	62	731318762	731318762 [1035-1050]		1	1643.89	299.2	119.1	23.8	107.2	147.9	22.8	58.1	80.7	76.1	65.3		High	High	High	High	High	High	High	High	High	High	High	7.23e-06	2.299e-07	3.7	25.44	Used	Used	R.QATKDAGVIAGLNVMR.I	[1035-1050]
	FALSE	High	[R].QATKDAGVIAGLNVMR.[I]	1xOxidation [M15]	0.000895687	0.000154279	1	1	5	731318762	731318762 [1035-1050]		1	1659.88	78	22.2		83.7	700.9	4.6	44.2	23.4	27.1	15.9		High	High	Not Found	High	Peak Found	Peak Found	Peak Found	High	High	Peak Found	High	2.424e-05	9.543e-05	1.99	16.85	Used	Used	R.QATKDAGVIAGLNVMR.I	[1035-1050]
	FALSE	High	[R].QATKDAGVIAGLNVMR.[I]	1xGG [K/T]	0.0654061	0.003524	1	1	3	731318762	731318762 [1035-1050]		1	1757.93		127.7	423.8	33		211	120		84.4			Not Found	High	High	Peak Found	Not Found	Peak Found	Peak Found	Not Found	Peak Found	Not Found	High	0.0005019	0.006816	1.11	19.02	Used	Used	R.QATKDAGVIAGLNVMR.I	[1035-1050]
	FALSE	High	[R].QATKDAGVISGLNVMR.[I]		1.92581e-07	5.33751e-05	2	3	40	731349044; 731318762	731349044 [160-175]; 731318762 [160-175]		1	1659.88	348.8	191.4	20.1	152	73.2	1.6	74.1	43.2	55.6	40	Shared	High	High	High	High	High	Peak Found	High	High	High	High	High	7.23e-06	2.604e-08	4.05	24.25	Used	Used	R.QATKDAGVISGLNVMR.I	[160-175]
	FALSE	High	[R].QATKDAGVISGLNVMR.[I]	1xGG [K4]	0.00157383	0.000154279	2	3	2	731349044; 731318762	731349044 [160-175]; 731318762 [160-175]		1	1773.93		151.2	689.1						39.5	120.1	Shared	Not Found	Peak Found	High	Not Found	Not Found	Not Found	Not Found	Not Found	Peak Found	Peak Found	High	2.424e-05	0.0001627	2.12	18.31	Used	Used	R.QATKDAGVISGLNVMR.I	[160-175]
	FALSE	High	[K].QFAAEEISSMVLIK.[M]		2.46394e-05	5.33751e-05	1	1	3	731318762	731318762 [992-1005]		0	1565.82				57		32.8	88.1	388.1	200.7	233.3		Not Found	Not Found	Not Found	Peak Found	Not Found	Peak Found	Peak Found	High	High	Peak Found	High	7.23e-06	2.955e-06	2.22	53.59	Used	Used	K.QFAAEEISSMVLIK.M	[992-1005]
	FALSE	High	[K].QFAAEEISSMVLTK.[M]		4.27049e-06	5.33751e-05	1	2	23	731318762	731318762 [117-130]		0	1553.79	14.8	119.4	4.1	54.1	50.5	80.3	69.3	326.2	160.2	121		Peak Found	High	Peak Found	High	High	High	High	High	High	High	High	7.23e-06	5.342e-07	3.21	51.88	Used	Used	K.QFAAEEISSMVLTK.M	[117-130]
	FALSE	High	[K].RTLSSTAQTTIEIDSLFEGVDFYSPITR.[A]		6.67287e-08	5.33751e-05	1	1	7	731318762	731318762 [278-305]		1	3147.58	538.5	147.7		117.3			30.5	42.4	94	29.7		High	High	Not Found	High	Not Found	Not Found	High	High	Peak Found	Peak Found	High	7.23e-06	9.272e-09	5.61	84.84	Used	Used	K.RTLSSTAQTTIEIDSLFEGVDFYSPITR.A	[278-305]
	FALSE	High	[K].SINPDEAVAYGAAVQAAILSGEGNEK.[V]		2.78458e-08	5.33751e-05	3	3	31	731352584; 731349044; 731318762	731352584 [379-404]; 731349044 [368-393]; 731318762 [368-393]; [1243-1268]		0	2574.27	20.6	175.7	51.5	70.3	70.6	95.7	84.6	185.3	140.7	105	Shared	High	High	High	High	Peak Found	High	High	High	High	High	High	7.23e-06	3.947e-09	5.41	76.2	Used	Used	K.SINPDEAVAYGAAVQAAILSGEGNEK.V; K.SINPDEAVAYGAAVQAAILSGEGNEK.V	[368-393]; [1243-1268]
	FALSE	High	[K].STVHDVVLVGGSTR.[I]		1.24759e-06	5.33751e-05	1	1	54	731318762	731318762 [1210-1223]		0	1426.76	117.9	161.9	43.3	79.4	45.5	123.4	111.6	86.9	115	115.1		High	High	High	High	High	High	High	High	High	High	High	7.23e-06	1.608e-07	3.75	13.1	Used	Used	K.STVHDVVLVGGSTR.I	[1210-1223]
	FALSE	High	[K].STVHEVVLVGGSTR.[I]		3.51438e-06	5.33751e-05	1	1	59	731318762	731318762 [335-348]		0	1440.78	107.8	144.6	74.3	68.2	70	99.1	86.9	111.5	102.6	135		High	High	High	High	High	High	High	High	High	High	High	7.23e-06	4.421e-07	4.14	11.38	Used	Used	K.STVHEVVLVGGSTR.I	[335-348]
	FALSE	High	[K].STVHEVVLVGGSTRIPK.[V]		0.000126678	9.51359e-05	1	1	1	731318762	731318762 [335-351]		1	1779.01	404.9				595.1							High	Not Found	Not Found	Not Found	Peak Found	Not Found	Not Found	Not Found	Not Found	Not Found	High	1.364e-05	1.488e-05	3.38	16.93	Used	Used	K.STVHEVVLVGGSTRIPK.V	[335-351]
	FALSE	High	[R].TLSSTAQTTIEIDSLFEGVDFYSPITR.[A]		8.45816e-08	5.33751e-05	1	1	24	731318762	731318762 [279-305]		0	2991.48	78	171.1	151.3	11.7	2	151.8	366.5	30.3	25.8	11.6		High	High	High	High	High	High	High	High	High	High	High	7.23e-06	1.166e-08	3.93	107.83	Used	Used	R.TLSSTAQTTIEIDSLFEGVDFYSPITR.A	[279-305]
	FALSE	High	[R].TLSSTAQTTIEIDSLYEGVDFYTTITR.[A]		1.12884e-05	5.33751e-05	2	2	18	731349044; 731318762	731349044 [279-305]; 731318762 [1154-1180]		0	3025.49	367.1	120.9	152.9			52.1	115.5	89.6	66.7	35.2	Shared	High	High	High	Not Found	Not Found	High	Peak Found	High	High	Peak Found	High	7.23e-06	1.376e-06	3.46	95.55	Used	Used	R.TLSSTAQTTIEIDSLYEGVDFYTTITR.A	[1154-1180]
	FALSE	High	[R].TTPSYVAFTDSER.[L]		7.37826e-06	5.33751e-05	1	1	74	731318762	731318762 [40-52]		0	1473.69	65.3	138.3	143.4	37.7	53.8	122.5	105	70.1	113.3	150.6		High	High	High	High	High	High	High	High	High	High	High	7.23e-06	9.1e-07	1.54	18.45	Used	Used	R.TTPSYVAFTDSER.L	[40-52]
	FALSE	High	[R].TTPSYVAFTDSERLIGDAAK.[N]		2.60913e-08	5.33751e-05	1	1	71	731318762	731318762 [40-59]		1	2142.07	294.2	147.6	15.2	130.6	123.8	6.3	95.5	69.6	76	41.3		High	High	High	High	High	Peak Found	High	High	High	High	High	7.23e-06	3.71e-09	3.98	47.19	Used	Used	R.TTPSYVAFTDSERLIGDAAK.N	[40-59]
	FALSE	High	[R].TTPSYVAFTDSERLIGDAAKNQVAMNPINTVFDAK.[R]		0.000201655	9.51359e-05	1	1	6	731318762	731318762 [40-74]		2	3784.89	571.2	15.2		220.7	125.6			6.5	57.4	3.4		High	Peak Found	Not Found	High	High	Not Found	Not Found	Peak Found	Peak Found	Peak Found	High	1.696e-05	2.318e-05	2.53	78.75	Used	Used	R.TTPSYVAFTDSERLIGDAAKNQVAMNPINTVFDAK.R	[40-74]
	FALSE	High	[KR].VEIIANDQGNR.[IT]		4.25863e-05	5.33751e-05	4	4	17	731321538; 731349044; 731313180; 731318762	731321538 [57-67]; 731349044 [29-39]; 731313180 [29-39]; 731318762 [29-39]		0	1228.63	40.7	62	32.2	23.6	22.1	200.4	185.5	91	138.5	204	Shared	Peak Found	High	Peak Found	Peak Found	High	High	High	High	High	High	High	7.23e-06	5.053e-06	2.72	10.97	Used	Used	R.VEIIANDQGNR.T	[29-39]
	FALSE	High	[K].VIPGPGDKPMIVVSYKGEDKQFAAEEISSMVLIK.[M]		0.0176211	0.00116067	1	1	1	731318762	731318762 [972-1005]		2	3675.94								1000				Not Found	Not Found	Not Found	Not Found	Not Found	Not Found	Not Found	High	Not Found	Not Found	High	0.0001749	0.001812	1.74	50.3	Used	Used	K.VIPGPGDKPMIVVSYKGEDKQFAAEEISSMVLIK.M	[972-1005]
	FALSE	High	[K].VIPGPGEKPMIVVNYKGEEK.[Q]		7.91204e-07	5.33751e-05	1	1	16	731318762	731318762 [97-116]		1	2184.17	63.5	42.7	477.1	96.3	5.8	87.8	80.2	72.7	41.3	32.7		Peak Found	High	High	High	Peak Found	High	High	High	Peak Found	High	High	7.23e-06	1.031e-07	4.99	9.98	Used	Used	K.VIPGPGEKPMIVVNYKGEEK.Q	[97-116]
	FALSE	High	[K].VIPGPGEKPMIVVNYKGEEKQFAAEEISSMVLTK.[M]		0.000109917	5.33751e-05	1	1	14	731318762	731318762 [97-130]		2	3718.94	38.3	188.7	136.4	19.7	4.4	103.2	105.9	214	155.2	34.3		Peak Found	High	Peak Found	High	Peak Found	High	High	High	High	High	High	7.23e-06	1.292e-05	3.02	51.02	Used	Used	K.VIPGPGEKPMIVVNYKGEEKQFAAEEISSMVLTK.M	[97-130]
	FALSE	High	[K].VQDLLLLDVTPLSLGLETAGGVMTVLIPR.[N]		1.73017e-10	5.33751e-05	2	2	67	731349044; 731318762	731349044 [394-422]; 731318762 [394-422]; [1269-1297]		0	3033.73	46.4	18.9	61	67.2	247.1	60.2	61.3	298.3	87.8	51.8	Shared	High	High	High	High	High	High	High	High	High	High	High	7.23e-06	2.79e-11	6.33	109.94	Used	Used	K.VQDLLLLDVTPLSLGLETAGGVMTVLIPR.N; K.VQDLLLLDVTPLSLGLETAGGVMTVLIPR.N	[394-422]; [1269-1297]
	FALSE	High	[K].VQDLLLLDVTPLSLGLETAGGVMTVLIPR.[N]	1xOxidation [M23]	2.74851e-05	5.33751e-05	2	2	3	731349044; 731318762	731349044 [394-422]; 731318762 [394-422]; [1269-1297]		0	3049.72					739.6			122.7		137.8	Shared	Not Found	Not Found	Not Found	Not Found	High	Not Found	Not Found	Peak Found	Not Found	High	High	7.23e-06	3.295e-06	3.57	103.35	Used	Used	K.VQDLLLLDVTPLSLGLETAGGVMTVLIPR.N; K.VQDLLLLDVTPLSLGLETAGGVMTVLIPR.N	[394-422]; [1269-1297]
	FALSE	High	[K].VQQLLQDFFNGK.[E]		2.52075e-05	5.33751e-05	3	3	45	731349044; 731318762; 731310842	731349044 [352-363]; 731318762 [352-363]; [1227-1238]; 731310842 [351-362]		0	1436.75	50.1	82.1	81.2	189.3	127.9	112	81	113.8	76.6	85.9	Shared	High	High	High	High	High	High	High	High	High	High	High	7.23e-06	3.029e-06	3.64	55.79	Used	Used	K.VQQLLQDFFNGK.E; K.VQQLLQDFFNGK.E	[352-363]; [1227-1238]
	FALSE	High	[K].VQQLLQDFFNGKELCK.[S]	1xCarbamidomethyl [C15]	2.00809e-07	5.33751e-05	3	3	61	731349044; 731318762; 731310842	731349044 [352-367]; 731318762 [352-367]; [1227-1242]; 731310842 [351-366]		1	1967.01	24	129.8	4.5	287.8	201.9	67.4	74.4	94.4	52.4	63.5	Shared	High	High	High	High	High	High	High	High	High	High	High	7.23e-06	2.707e-08	3.67	52.59	Used	Used	K.VQQLLQDFFNGKELCK.S; K.VQQLLQDFFNGKELCK.S	[352-367]; [1227-1242]
FALSE		High	Master Protein	8157161373445240598	4469	731313356	PREDICTED: alcohol dehydrogenase 3 [Beta vulgaris subsp. vulgaris]	MTSTAGQVIRCKAAVAWEAGKPLVMEEVEVAPPQKMEVRVKILFTSLCHTDVYFWEAKGQTPVFPRILGHEAGGIVESVGEGVTDLQPGDHVLPVFTGECKECAHCKSEESNMCDLLRINTDRGVMLNDGKSRFSINGKPIFHFVGTSTFSEYTVVHVGCLAKINPEAPLDKVCILSCGISTGFGATVNVARPKKGQTVAIFGLGAVGLAAAEGARVSGASKIIGVDLVSSRFEAAKKFGVTDFVNPKDHNKPVQEVIAEMTNGGVDRSVECTGNIQAMISAFECVHDGWGVAVLVGVPNKDDAFKTHPVNFLNERTLKGTFFGNYKPRTDIPGVVEKYMNKELELDKFITHEVAFKDINKAFDLMLKGESIRCIIRMDA	>gi|731313356|ref|XP_010679876.1| PREDICTED: alcohol dehydrogenase 3 [Beta vulgaris subsp. vulgaris]	0	854.129	98	48	2969	33	33	380	41.2	6.68	7203.8	98	2969	48	21	117.2	117.2	102	112.2	99.4	81.4	75.9	108.3	93.1	93.5	3.59542e+09	7.30671e+09	3.93184e+09	3.55973e+09	1.20888e+09	4.17794e+09	1.9974e+09	4.01411e+09	4.23177e+09	4.09257e+09	7.30683e+09	7.30671e+09	6.3588e+09	6.99955e+09	6.20186e+09
	Checked	Confidence	Annotated Sequence	Modifications	Qvality PEP	Qvality q-value	# Protein Groups	# Proteins	# PSMs	Master Protein Accessions	Positions in Master Proteins	Modifications in Master Proteins	# Missed Cleavages	Theo. MH+ [Da]	Abundances (Scaled): F1: Control	Abundances (Scaled): F2: Control	Abundances (Scaled): F3: Control	Abundances (Scaled): F4: Control	Abundances (Scaled): F5: Control	Abundances (Scaled): F6: Sample	Abundances (Scaled): F7: Sample	Abundances (Scaled): F8: Sample	Abundances (Scaled): F9: Sample	Abundances (Scaled): F10: Sample	Quan Info	Found in Sample: [S1] F1: Control	Found in Sample: [S2] F2: Control	Found in Sample: [S3] F3: Control	Found in Sample: [S4] F4: Control	Found in Sample: [S5] F5: Control	Found in Sample: [S6] F6: Sample	Found in Sample: [S7] F7: Sample	Found in Sample: [S8] F8: Sample	Found in Sample: [S9] F9: Sample	Found in Sample: [S10] F10: Sample	Confidence (by Search Engine): Sequest HT	Percolator q-Value (by Search Engine): Sequest HT	Percolator PEP (by Search Engine): Sequest HT	XCorr (by Search Engine): Sequest HT	Top Apex RT [min]	Quan Usage	Quan Ratio Usage	Sequence in Protein	Positions in Proteins
	FALSE	High	[K].AAVAWEAGKPLVMEEVEVAPPQK.[M]		1.02018e-08	5.33751e-05	1	1	57	731313356	731313356 [13-35]		0	2449.28	33.3	120.3	41.9	114.7	181.1	130.6	101.2	103.9	112.1	60.9		High	High	High	High	High	High	High	High	High	High	High	7.23e-06	1.482e-09	6.51	43.6	Used	Used	K.AAVAWEAGKPLVMEEVEVAPPQK.M	[13-35]
	FALSE	High	[K].AAVAWEAGKPLVMEEVEVAPPQK.[M]	1xOxidation [M13]	0.00027261	9.51359e-05	1	1	2	731313356	731313356 [13-35]		0	2465.27				105	328.9	153.3		276.2	50.6	85.9		Not Found	Not Found	Not Found	High	Peak Found	High	Not Found	Peak Found	Peak Found	Peak Found	High	1.696e-05	3.09e-05	2.33	37.6	Used	Used	K.AAVAWEAGKPLVMEEVEVAPPQK.M	[13-35]
	FALSE	High	[K].AAVAWEAGKPLVMEEVEVAPPQKMEVR.[V]		1.77086e-10	5.33751e-05	1	1	72	731313356	731313356 [13-39]		1	2964.53	171	166	52	165.4	218.3	39.7	46.6	48.4	64	28.5		High	High	High	High	High	High	High	High	High	High	High	7.23e-06	2.853e-11	6.9	44.02	Used	Used	K.AAVAWEAGKPLVMEEVEVAPPQKMEVR.V	[13-39]
	FALSE	High	[K].AAVAWEAGKPLVMEEVEVAPPQKMEVR.[V]	1xOxidation [M13]	8.32703e-07	5.33751e-05	1	1	1	731313356	731313356 [13-39]		1	2980.53				984.3			15.7					Not Found	Not Found	Not Found	High	Not Found	Not Found	Peak Found	Not Found	Not Found	Not Found	High	7.23e-06	1.085e-07	3.83	43.65	Used	Used	K.AAVAWEAGKPLVMEEVEVAPPQKMEVR.V	[13-39]
	FALSE	High	[K].AAVAWEAGKPLVMEEVEVAPPQKMEVR.[V]	2xOxidation [M13; M24]	0.0838582	0.00412561	1	1	1	731313356	731313356 [13-39]		1	2996.52						87.2				912.8		Not Found	Not Found	Not Found	Not Found	Not Found	Peak Found	Not Found	Not Found	Not Found	High	High	0.0006041	0.00898	2.24	20.11	Used	Used	K.AAVAWEAGKPLVMEEVEVAPPQKMEVR.V	[13-39]
	FALSE	High	[K].AFDLMLK.[G]		0.00180885	0.00019222	1	1	44	731313356	731313356 [362-368]		0	837.454	20.6	108.9	219.5	91.3	89.7	116.3	91.1	95.4	100.3	66.9		High	High	High	High	High	High	High	High	High	High	High	2.806e-05	0.0001853	1.16	35.45	Used	Used	K.AFDLMLK.G	[362-368]
	FALSE	High	[K].AFDLMLK.[G]	1xOxidation [M5]	0.00591477	0.000491899	1	1	3	731313356	731313356 [362-368]		0	853.449		144.9	103.7	402.6	58.7			16.1	5.4	268.5		Not Found	Peak Found	High	Peak Found	Peak Found	Not Found	Not Found	Peak Found	Peak Found	High	High	6.94e-05	0.0005984	1.07	26.5	Used	Used	K.AFDLMLK.G	[362-368]
	FALSE	High	[K].AFDLMLKGESIR.[C]		2.55119e-06	5.33751e-05	1	1	106	731313356	731313356 [362-373]		1	1379.74	81.6	132.1	52.3	163.5	98	138.5	63.9	113.7	85.2	71.3		High	High	High	High	High	High	High	High	High	High	High	7.23e-06	3.232e-07	2.83	33.09	Used	Used	K.AFDLMLKGESIR.C	[362-373]
	FALSE	High	[K].AFDLMLKGESIR.[C]	1xOxidation [M5]	0.000145252	9.51359e-05	1	1	11	731313356	731313356 [362-373]		1	1395.73	31.5	40.1	102.8	67.1	323.6	28.5	8.6	19.6	11.3	367		Peak Found	High	High	Peak Found	High	Peak Found	Peak Found	Peak Found	Peak Found	High	High	1.696e-05	1.699e-05	2.76	19.46	Used	Used	K.AFDLMLKGESIR.C	[362-373]
	FALSE	High	[K].AFDLMLKGESIR.[C]	1xGG [K7]	0.000985945	0.000154279	1	1	1	731313356	731313356 [362-373]		1	1493.78		265.9	476.8	60.3	66.2	66.2				64.6		Not Found	High	Peak Found	Peak Found	Peak Found	Peak Found	Not Found	Not Found	Not Found	Peak Found	High	2.424e-05	0.0001044	1.96	27.03	Used	Used	K.AFDLMLKGESIR.C	[362-373]
	FALSE	High	[R].CKAAVAWEAGKPLVMEEVEVAPPQK.[M]	1xCarbamidomethyl [C1]	2.4811e-06	5.33751e-05	1	1	6	731313356	731313356 [11-35]		1	2737.41		155.7	83.2	217.8	306.3	17.6	109.9	55.5	47.1	6.9		Not Found	High	High	High	Peak Found	Peak Found	Peak Found	High	Peak Found	Peak Found	High	7.23e-06	3.143e-07	4.13	34.92	Used	Used	R.CKAAVAWEAGKPLVMEEVEVAPPQK.M	[11-35]
	FALSE	High	[R].CKAAVAWEAGKPLVMEEVEVAPPQKMEVR.[V]	1xCarbamidomethyl [C1]	2.35895e-09	5.33751e-05	1	1	10	731313356	731313356 [11-39]		2	3252.66	52.8	28.9	53	380	162.1	37.2	74	116.5	29.1	66.6		High	Peak Found	Peak Found	High	High	Peak Found	High	High	Peak Found	Peak Found	High	7.23e-06	3.568e-10	6.47	37.57	Used	Used	R.CKAAVAWEAGKPLVMEEVEVAPPQKMEVR.V	[11-39]
	FALSE	High	[K].DHNKPVQEVIAEMTNGGVDR.[S]		2.43339e-08	5.33751e-05	1	1	89	731313356	731313356 [249-268]		0	2209.07	74.4	73.1	122.6	86.3	257	100.9	64.5	75.2	85.1	60.9		High	High	High	High	High	High	High	High	High	High	High	7.23e-06	3.466e-09	5.1	40.78	Used	Used	K.DHNKPVQEVIAEMTNGGVDR.S	[249-268]
	FALSE	High	[K].DHNKPVQEVIAEMTNGGVDR.[S]	1xOxidation [M13]	3.2933e-06	5.33751e-05	1	1	7	731313356	731313356 [249-268]		0	2225.06	39.7	20.2	4	197.2	71.1	101.3	92.6	36.4	80.7	356.9		Peak Found	High	Peak Found	High	High	High	Peak Found	Peak Found	Peak Found	High	High	7.23e-06	4.142e-07	3.94	14.25	Used	Used	K.DHNKPVQEVIAEMTNGGVDR.S	[249-268]
	FALSE	High	[K].DINKAFDLMLK.[G]		1.37002e-05	5.33751e-05	1	1	24	731313356	731313356 [358-368]		1	1307.7	4.4	86.4	9.4	205.6	227	157.2	76.4	93	79.6	61		Peak Found	High	Peak Found	High	High	High	High	High	High	High	High	7.23e-06	1.662e-06	2.31	44.71	Used	Used	K.DINKAFDLMLK.G	[358-368]
	FALSE	High	[K].DINKAFDLMLKGESIR.[C]		1.72763e-09	5.33751e-05	1	1	54	731313356	731313356 [358-373]		2	1849.98	98.3	154.5	83	125.6	72.1	99.6	69.8	64.1	104.9	128		High	High	High	High	High	High	High	High	High	High	High	7.23e-06	2.626e-10	4.64	47.16	Used	Used	K.DINKAFDLMLKGESIR.C	[358-373]
	FALSE	High	[K].DINKAFDLMLKGESIR.[C]	1xOxidation [M9]	0.000122157	9.51359e-05	1	1	3	731313356	731313356 [358-373]		2	1865.98	205.1	242.4	17.2	6.7	240.3	14	46.7	11.3	82.4	133.7		Peak Found	Peak Found	Peak Found	Peak Found	High	Peak Found	Peak Found	Peak Found	Peak Found	High	High	1.364e-05	1.434e-05	2.32	50.6	Used	Used	K.DINKAFDLMLKGESIR.C	[358-373]
	FALSE	High	[K].ECAHCKSEESNMCDLLR.[I]	3xCarbamidomethyl [C2; C5; C13]	8.48315e-10	5.33751e-05	2	2	56	731313358; 731313356	731313358 [108-124]; 731313356 [102-118]		1	2138.87	0.6	123.6	149.6	125.6	193.5	51.6	115.4	67.8	78.1	94.3	Shared	Peak Found	High	High	High	High	High	High	High	High	High	High	7.23e-06	1.316e-10	5.96	14.6	Used	Used	K.ECAHCKSEESNMCDLLR.I	[102-118]
	FALSE	High	[K].ELELDKFITHEVAFK.[D]		1.19094e-06	5.33751e-05	1	1	61	731313356	731313356 [343-357]		1	1818.96	39.6	49.1	196.2	118.2	53	148.7	113.5	111.6	79.4	90.7		High	High	High	High	High	High	High	High	High	High	High	7.23e-06	1.537e-07	4.38	107.71	Used	Used	K.ELELDKFITHEVAFK.D	[343-357]
	FALSE	High	[K].ELELDKFITHEVAFKDINK.[A]		1.48443e-07	5.33751e-05	1	1	28	731313356	731313356 [343-361]		2	2289.21	29.8	56.8	197.5	150.5	6.9	340.4	47.7	53.5	45.8	71		Peak Found	High	High	High	Peak Found	High	High	High	High	High	High	7.23e-06	2.018e-08	6.33	45.25	Used	Used	K.ELELDKFITHEVAFKDINK.A	[343-361]
	FALSE	High	[K].FGVTDFVNPK.[D]		3.32513e-05	5.33751e-05	3	3	91	731313358; 731347368; 731313356	731313358 [245-254]; 731347368 [242-251]; 731313356 [239-248]		0	1123.58	170.6	196.5	41.8	82.1	85.3	52.9	54.2	92	60.5	164	Shared	High	High	High	High	High	High	High	High	High	High	High	7.23e-06	3.964e-06	1.56	36.91	Used	Used	K.FGVTDFVNPK.D	[239-248]
	FALSE	High	[K].FGVTDFVNPKDHNKPVQEVIAEMTNGGVDR.[S]		4.99409e-07	5.33751e-05	1	1	38	731313356	731313356 [239-268]		1	3313.63	311	149.1	132.5	130.2	58.4	89.8	21	52.6	22.9	32.4		High	High	High	High	High	High	High	High	High	High	High	7.23e-06	6.596e-08	5.97	62.45	Used	Used	K.FGVTDFVNPKDHNKPVQEVIAEMTNGGVDR.S	[239-268]
	FALSE	High	[K].FGVTDFVNPKDHNKPVQEVIAEMTNGGVDR.[S]	1xOxidation [M23]	0.000224491	9.51359e-05	1	1	7	731313356	731313356 [239-268]		1	3329.62	23.7	43.6	30.1	43.9	558.4	100				200.3		Peak Found	Peak Found	Peak Found	Peak Found	High	Peak Found	Not Found	Not Found	Not Found	High	High	1.696e-05	2.572e-05	2.37	64.01	Used	Used	K.FGVTDFVNPKDHNKPVQEVIAEMTNGGVDR.S	[239-268]
	FALSE	High	[K].FITHEVAFK.[D]		0.0159017	0.000968112	1	1	2	731313356	731313356 [349-357]		0	1091.59			471.8		77.6	94.9	59.6	49.4	104	142.7		Not Found	Not Found	Peak Found	Not Found	High	High	Peak Found	Peak Found	Peak Found	Peak Found	High	0.0001477	0.001639	1.54	9.48	Used	Used	K.FITHEVAFK.D	[349-357]
	FALSE	High	[R].FSINGKPIFHFVGTSTFSEYTVVHVGCLAK.[I]	1xCarbamidomethyl [C27]	7.00074e-09	5.33751e-05	2	2	13	731313358; 731313356	731313358 [140-169]; 731313356 [134-163]		0	3342.7	9.1	7.3		29.4	8.1	12.8	22	798.5	41.3	71.7	Shared	Peak Found	Peak Found	Not Found	High	Peak Found	Peak Found	Peak Found	High	High	High	High	7.23e-06	1.029e-09	5.95	51.56	Used	Used	R.FSINGKPIFHFVGTSTFSEYTVVHVGCLAK.I	[134-163]
	FALSE	High	[K].GQTPVFPR.[I]		0.00288336	0.000222105	2	2	40	731313358; 731313356	731313358 [65-72]; 731313356 [59-66]		0	901.489	101.7	65.2	44.9	63.3	26	174.5	171.3	80.2	146.8	126.2	Shared	High	High	High	Peak Found	High	High	High	High	High	High	High	3.769e-05	0.0002904	1.48	11.77	Used	Used	K.GQTPVFPR.I	[59-66]
	FALSE	High	[K].GQTVAIFGLGAVGLAAAEGAR.[V]		2.214e-07	5.33751e-05	1	1	16	731313356	731313356 [196-216]		0	1929.06		82.4		233.5	84.2	20.3	6.7	327.6	173.3	72.1		High	High	Not Found	High	Peak Found	High	Peak Found	High	High	High	High	7.23e-06	2.978e-08	3.2	70.43	Used	Used	K.GQTVAIFGLGAVGLAAAEGAR.V	[196-216]
	FALSE	High	[K].GTFFGNYKPR.[T]		5.70803e-05	5.33751e-05	2	2	297	731313358; 731313356	731313358 [326-335]; 731313356 [320-329]		0	1186.6	158.5	90.9	121.8	85.4	128.5	96.5	78.6	55.7	90	94.3	Shared	High	High	High	High	High	High	High	High	High	High	High	7.23e-06	6.745e-06	1.77	14.48	Used	Used	K.GTFFGNYKPR.T	[320-329]
	FALSE	High	[K].KFGVTDFVNPK.[D]		1.51642e-06	5.33751e-05	3	3	126	731313358; 731347368; 731313356	731313358 [244-254]; 731347368 [241-251]; 731313356 [238-248]		1	1251.67	118.4	93.1	100.8	100.7	157.4	112.2	80.3	71.5	62.2	103.2	Shared	High	High	High	High	High	High	High	High	High	High	High	7.23e-06	1.947e-07	2.91	18.18	Used	Used	K.KFGVTDFVNPK.D	[238-248]
	FALSE	High	[K].KFGVTDFVNPK.[D]	1xGG [K/T]	0.000478563	0.000126394	3	3	2	731313358; 731347368; 731313356	731313358 [244-254]; 731347368 [241-251]; 731313356 [238-248]		1	1365.72		101.1	413.7	1.1	20.4	185.1	136.8	33.9	58	50	Shared	Not Found	High	High	Peak Found	Peak Found	Peak Found	Peak Found	Peak Found	Peak Found	Peak Found	High	1.859e-05	5.263e-05	3.03	18.45	Used	Used	K.KFGVTDFVNPK.D	[238-248]
	FALSE	High	[K].KFGVTDFVNPKDHNKPVQEVIAEMTNGGVDR.[S]		2.12649e-08	5.33751e-05	1	1	30	731313356	731313356 [238-268]		2	3441.72	204.7	310.5	23.1	79.6	54.3	140.1	39.4	16	82.3	50.1		High	High	Peak Found	High	High	High	High	High	High	High	High	7.23e-06	3.034e-09	3.58	50.85	Used	Used	K.KFGVTDFVNPKDHNKPVQEVIAEMTNGGVDR.S	[238-268]
	FALSE	High	[K].KFGVTDFVNPKDHNKPVQEVIAEMTNGGVDR.[S]	1xOxidation [M24]	0.000169972	9.51359e-05	1	1	2	731313356	731313356 [238-268]		2	3457.72		50.3	44.1		699.3	37.5		59.8		108.9		Not Found	Peak Found	Peak Found	Not Found	High	Peak Found	Not Found	Peak Found	Not Found	Peak Found	High	1.696e-05	1.976e-05	3.27	50.84	Used	Used	K.KFGVTDFVNPKDHNKPVQEVIAEMTNGGVDR.S	[238-268]
	FALSE	High	[K].KGQTVAIFGLGAVGLAAAEGAR.[V]		2.55231e-12	5.33751e-05	1	1	193	731313356	731313356 [195-216]		1	2057.15	62.1	97.6	31.6	116.2	56.6	58.9	56.8	289.5	124	106.7		High	High	High	High	High	High	High	High	High	High	High	7.23e-06	4.573e-13	5.4	51.8	Used	Used	K.KGQTVAIFGLGAVGLAAAEGAR.V	[195-216]
	FALSE	High	[K].KGQTVAIFGLGAVGLAAAEGAR.[V]	1xGG [K/T]	1.43024e-07	5.33751e-05	1	1	25	731313356	731313356 [195-216]		1	2171.19	0.6	131.4	20.1	92.3	28.9	193.1	127.3	83.4	115	207.8		Peak Found	High	High	High	High	High	High	High	High	High	High	7.23e-06	1.943e-08	3.8	49.86	Used	Used	K.KGQTVAIFGLGAVGLAAAEGAR.V	[195-216]
	FALSE	High	[K].KGQTVAIFGLGAVGLAAAEGARVSGASK.[I]		1.42958e-13	5.33751e-05	1	1	8	731313356	731313356 [195-222]		2	2586.44		32.3		139.6	6		8.3	564.4	181	68.3		Not Found	High	Not Found	High	Peak Found	Not Found	Peak Found	High	High	Peak Found	High	7.23e-06	2.762e-14	8.4	48.77	Used	Used	K.KGQTVAIFGLGAVGLAAAEGARVSGASK.I	[195-222]
	FALSE	High	[K].ILFTSLCHTDVYFWEAK.[G]	1xCarbamidomethyl [C7]	5.27218e-09	5.33751e-05	1	1	117	731313356	731313356 [42-58]		0	2130.04	5.1	34.1	46.4	120.9	39.2	12.7	70.5	488.7	123.9	58.4		High	High	High	High	High	High	High	High	High	High	High	7.23e-06	7.798e-10	3.91	58.72	Used	Used	K.ILFTSLCHTDVYFWEAK.G	[42-58]
	FALSE	High	[K].ILFTSLCHTDVYFWEAKGQTPVFPR.[I]	1xCarbamidomethyl [C7]	1.02946e-11	5.33751e-05	1	1	19	731313356	731313356 [42-66]		1	3012.51	3.2	1.7		174.4	36	10.2	6.7	631.3	85.9	50.6		Peak Found	High	Not Found	High	High	Peak Found	Peak Found	High	High	High	High	7.23e-06	1.786e-12	6.51	57.85	Used	Used	K.ILFTSLCHTDVYFWEAKGQTPVFPR.I	[42-66]
	FALSE	High	[R].ILGHEAGGIVESVGEGVTDLQPGDHVLPVFTGECK.[E]	1xCarbamidomethyl [C34]	1.52833e-11	5.33751e-05	1	1	55	731313356	731313356 [67-101]		0	3616.8	30.4	101.5	387.1	89.9	16.3	111	54.6	88.3	60.6	60.3		High	High	High	High	Peak Found	High	High	High	High	High	High	7.23e-06	2.616e-12	6.73	105.91	Used	Used	R.ILGHEAGGIVESVGEGVTDLQPGDHVLPVFTGECK.E	[67-101]
	FALSE	High	[R].ILGHEAGGIVESVGEGVTDLQPGDHVLPVFTGECKECAHCK.[S]	3xCarbamidomethyl [C34; C37; C40]	5.73935e-13	5.33751e-05	1	1	11	731313356	731313356 [67-107]		1	4402.09	0.6	114.2	457.2	358.2	9.8	11.1	34.4	1.4	13			Peak Found	High	High	High	Peak Found	Peak Found	High	Peak Found	High	Not Found	High	7.23e-06	1.071e-13	5.32	108.32	Used	Used	R.ILGHEAGGIVESVGEGVTDLQPGDHVLPVFTGECKECAHCK.S	[67-107]
	FALSE	High	[RK].IIGVDLVSSR.[F]		5.06659e-05	5.33751e-05	2	2	156	731313358; 731313356	731313358 [229-238]; 731313356 [223-232]		0	1058.62	78.3	165.8	112.8	70.7	85.4	92.1	72.4	102.4	89.3	130.7	Shared	High	High	High	High	High	High	High	High	High	High	High	7.23e-06	6.006e-06	1.48	29.88	Used	Used	K.IIGVDLVSSR.F	[223-232]
	FALSE	High	[RK].IIGVDLVSSRFEAAK.[K]		1.0771e-07	5.33751e-05	2	2	127	731313358; 731313356	731313358 [229-243]; 731313356 [223-237]		1	1604.9	183.6	138.3	60.5	143.4	170.2	31.8	40.8	83.4	75.7	72.3	Shared	High	High	High	High	High	High	High	High	High	High	High	7.23e-06	1.479e-08	2.62	39.76	Used	Used	K.IIGVDLVSSRFEAAK.K	[223-237]
	FALSE	High	[RK].IIGVDLVSSRFEAAKK.[F]		2.63547e-06	5.33751e-05	2	2	102	731313358; 731313356	731313358 [229-244]; 731313356 [223-238]		2	1733	289.9	333.4	17.6	107	77.3	22.6	32	35.4	57.3	27.6	Shared	High	High	High	High	High	High	High	High	High	High	High	7.23e-06	3.326e-07	3.48	34.29	Used	Used	K.IIGVDLVSSRFEAAKK.F	[223-238]
	FALSE	High	[K].INPEAPLDK.[V]		0.00479426	0.000431659	2	2	6	731313358; 731313356	731313358 [170-178]; 731313356 [164-172]		0	996.536		68.7		48.5	42.8	269.6	123.2	62.9	109	275.3	Shared	Not Found	Peak Found	Not Found	Peak Found	Peak Found	High	High	High	High	High	High	5.722e-05	0.0004811	1.89	11.61	Used	Used	K.INPEAPLDK.V	[164-172]
	FALSE	High	[K].INPEAPLDKVCILSCGISTGFGATVNVARPK.[K]	2xCarbamidomethyl [C11; C15]	2.2551e-10	5.33751e-05	1	1	25	731313356	731313356 [164-194]		1	3284.71	11.5	105.4	280.8	111.1	57.1	147.3	62.5	91.5	80.2	52.5		Peak Found	High	High	High	High	High	High	High	High	High	High	7.23e-06	3.621e-11	6.53	103.65	Used	Used	K.INPEAPLDKVCILSCGISTGFGATVNVARPK.K	[164-194]
	FALSE	High	[R].INTDRGVMLNDGK.[S]		7.98592e-07	5.33751e-05	2	2	60	731313358; 731313356	731313358 [125-137]; 731313356 [119-131]		1	1432.72	151.2	85.2	38.4	106.1	102	65.8	123.5	74.8	145.5	107.4	Shared	High	High	High	High	High	High	High	High	High	High	High	7.23e-06	1.042e-07	3.93	9.71	Used	Used	R.INTDRGVMLNDGK.S	[119-131]
	FALSE	High	[R].INTDRGVMLNDGK.[S]	1xOxidation [M8]	0.00854874	0.000588819	2	2	3	731313358; 731313356	731313358 [125-137]; 731313356 [119-131]		1	1448.72	44.8	93.4				118.8	159.3	63	108.6	412	Shared	Peak Found	Peak Found	Not Found	Not Found	Not Found	Peak Found	High	Peak Found	Peak Found	High	High	8.79e-05	0.0008693	2.22	9.56	Used	Used	R.INTDRGVMLNDGK.S	[119-131]
	FALSE	High	[R].INTDRGVMLNDGKSR.[F]		6.40892e-09	5.33751e-05	2	2	40	731313358; 731313356	731313358 [125-139]; 731313356 [119-133]		2	1675.85	335	46.8	0.5	229.8	60.5	39.6	58.9	105.5	95	28.5	Shared	High	High	Peak Found	High	High	Peak Found	High	High	High	High	High	7.23e-06	9.433e-10	4.73	9.89	Used	Used	R.INTDRGVMLNDGKSR.F	[119-133]
	FALSE	High	[R].INTDRGVMLNDGKSR.[F]	1xOxidation [M8]	0.0105193	0.000853352	2	2	2	731313358; 731313356	731313358 [125-139]; 731313356 [119-133]		2	1691.85		98.6	8.1					487.6	388.4	17.3	Shared	Not Found	High	Peak Found	Not Found	Not Found	Not Found	Not Found	Peak Found	High	Peak Found	High	0.0001133	0.001076	1.31	8.11	Used	Used	R.INTDRGVMLNDGKSR.F	[119-133]
	FALSE	High	[R].INTDRGVMLNDGKSR.[F]	1xGG [K13]	0.000309543	0.000126394	2	2	2	731313358; 731313356	731313358 [125-139]; 731313356 [119-133]		2	1789.9	34.6	69.2		15.7		132.2	9.8	186.7	57.3	494.3	Shared	Peak Found	High	Not Found	Peak Found	Not Found	Peak Found	Peak Found	Peak Found	Peak Found	Peak Found	High	1.859e-05	3.482e-05	3.95	10.94	Used	Used	R.INTDRGVMLNDGKSR.F	[119-133]
	FALSE	High	[-].MTSTAGQVIR.[C]	1xMet-loss+Acetyl [N-Term]	0.00011731	5.33751e-05	1	1	36	731313356	731313356 [1-10]	731313356 1xMet-loss+Acetyl [N-Term]	0	974.527	117.5	107.8	18.3	45	47.1	127.8	164.5	98.9	141.5	131.7		High	High	High	High	High	High	High	High	High	High	High	7.23e-06	1.378e-05	1.4	12.21	Used	Used	-.MTSTAGQVIR.C	[1-10]
	FALSE	High	[-].MTSTAGQVIRCK.[A]	1xCarbamidomethyl [C11]; 1xMet-loss+Acetyl [N-Term]	9.78291e-06	5.33751e-05	1	1	5	731313356	731313356 [1-12]	731313356 1xMet-loss+Acetyl [N-Term]	1	1262.65	28		4.4	31.3	55.2		70.7	547.6	125.9	136.9		Peak Found	Not Found	Peak Found	High	High	Not Found	Peak Found	High	High	High	High	7.23e-06	1.198e-06	2.54	12.4	Used	Used	-.MTSTAGQVIRCK.A	[1-12]
	FALSE	High	[K].SEESNMCDLLR.[I]	1xCarbamidomethyl [C7]	1.56562e-05	5.33751e-05	2	2	47	731313358; 731313356	731313358 [114-124]; 731313356 [108-118]		0	1353.58		110.6	97	66.1	77.4	89.6	161.4	155.7	110	132.2	Shared	Not Found	High	High	High	High	High	High	High	High	High	High	7.23e-06	1.899e-06	1.97	28.95	Used	Used	K.SEESNMCDLLR.I	[108-118]
	FALSE	High	[K].SEESNMCDLLR.[I]	1xCarbamidomethyl [C7]; 1xOxidation [M6]	0.000331199	0.000126394	2	2	2	731313358; 731313356	731313358 [114-124]; 731313356 [108-118]		0	1369.57						47.8	25.4	2.4	14.2	910.2	Shared	Not Found	Not Found	Not Found	Not Found	Not Found	Peak Found	Peak Found	Peak Found	Peak Found	High	High	1.859e-05	3.717e-05	2.67	11.65	Used	Used	K.SEESNMCDLLR.I	[108-118]
	FALSE	High	[R].SVECTGNIQAMISAFECVHDGWGVAVLVGVPNKDDAFK.[T]	2xCarbamidomethyl [C4; C17]	4.25716e-09	5.33751e-05	2	2	11	731313358; 731313356	731313358 [275-312]; 731313356 [269-306]		1	4120.96	29.1	257.8	221.7	62.4	6.2	26.8	53.4	193.3	136.5	12.7	Shared	Peak Found	High	High	High	Peak Found	Peak Found	Peak Found	High	High	High	High	7.23e-06	6.335e-10	6.33	109.93	Used	Used	R.SVECTGNIQAMISAFECVHDGWGVAVLVGVPNKDDAFK.T	[269-306]
	FALSE	High	[R].TDIPGVVEK.[Y]		0.000459361	0.000126394	1	1	53	731313356	731313356 [330-338]		0	957.525	91.2	96.8	119.4	86.9	42.6	127.7	120.8	62.3	109.7	142.7		High	High	High	High	High	High	High	High	High	High	High	1.859e-05	5.064e-05	1.8	12.05	Used	Used	R.TDIPGVVEK.Y	[330-338]
	FALSE	High	[R].TDIPGVVEKYMNK.[E]		3.65565e-05	5.33751e-05	1	1	20	731313356	731313356 [330-342]		1	1493.77	239.9	140.8	2.2	150.9	84.6	13.3	25	193.2	97.7	52.4		High	High	Peak Found	High	High	Peak Found	High	High	High	High	High	7.23e-06	4.344e-06	3.79	29.21	Used	Used	R.TDIPGVVEKYMNK.E	[330-342]
	FALSE	High	[K].THPVNFLNER.[T]		0.000411589	0.000126394	1	1	86	731313356	731313356 [307-316]		0	1226.63	50.5	102.6	312.2	54.7	80	76.1	89.5	53.9	72.8	107.8		High	High	High	High	High	High	High	High	High	High	High	1.859e-05	4.551e-05	1.96	12.08	Used	Used	K.THPVNFLNER.T	[307-316]
	FALSE	High	[KR].TLKGTFFGNYKPR.[T]		3.2312e-08	5.33751e-05	2	2	282	731313358; 731313356	731313358 [323-335]; 731313356 [317-329]		1	1528.83	161.8	148.2	81.8	147.6	159.4	43.1	43.2	56.7	84.6	73.6	Shared	High	High	High	High	High	High	High	High	High	High	High	7.23e-06	4.557e-09	2.76	13.19	Used	Used	R.TLKGTFFGNYKPR.T	[317-329]
	FALSE	High	[KR].TLKGTFFGNYKPR.[T]	1xGG [T5]	0.0011029	0.000154279	2	2	1	731313358; 731313356	731313358 [323-335]; 731313356 [317-329]		1	1642.87		651.4	63.1					68.5	217.1		Shared	Not Found	High	Peak Found	Not Found	Not Found	Not Found	Not Found	Peak Found	Peak Found	Not Found	High	2.424e-05	0.0001164	1.23	13.22	Used	Used	R.TLKGTFFGNYKPR.T	[317-329]
	FALSE	High	[R].TLKGTFFGNYKPRTDIPGVVEK.[Y]		7.63686e-05	5.33751e-05	1	1	13	731313356	731313356 [317-338]		2	2467.33	488.3	2.1	2.1	279.6	158		0.2	17.4	23.2	29		High	Peak Found	Peak Found	High	High	Not Found	Peak Found	Peak Found	High	High	High	7.23e-06	8.98e-06	3.07	32.59	Used	Used	R.TLKGTFFGNYKPRTDIPGVVEK.Y	[317-338]
	FALSE	High	[K].VCILSCGISTGFGATVNVARPK.[K]	2xCarbamidomethyl [C2; C6]	6.45118e-06	5.33751e-05	1	1	1	731313356	731313356 [173-194]		0	2307.19		508.5		81.9		223.3		107.6	78.6			Not Found	High	Not Found	Peak Found	Not Found	Peak Found	Not Found	Peak Found	Peak Found	Not Found	High	7.23e-06	7.983e-07	3.08	43.15	Used	Used	K.VCILSCGISTGFGATVNVARPK.K	[173-194]
	FALSE	High	[R].VKILFTSLCHTDVYFWEAK.[G]	1xCarbamidomethyl [C9]	6.18777e-06	5.33751e-05	1	1	7	731313356	731313356 [40-58]		1	2357.2		14.4		375.8	35.3			487.8	8.9	77.8		Not Found	Peak Found	Not Found	High	High	Not Found	Not Found	High	Peak Found	Peak Found	High	7.23e-06	7.655e-07	3.36	51.18	Used	Used	R.VKILFTSLCHTDVYFWEAK.G	[40-58]
	FALSE	High	[R].VKILFTSLCHTDVYFWEAKGQTPVFPR.[I]	1xCarbamidomethyl [C9]	1.42086e-12	5.33751e-05	1	1	24	731313356	731313356 [40-66]		2	3239.67				222	6.4		7.3	631.3	63.8	69.2		Not Found	Not Found	Not Found	High	High	Not Found	Peak Found	High	High	High	High	7.23e-06	2.588e-13	6.46	51.22	Used	Used	R.VKILFTSLCHTDVYFWEAKGQTPVFPR.I	[40-66]
	FALSE	High	[R].VSGASKIIGVDLVSSRFEAAK.[K]		1.83021e-05	5.33751e-05	1	1	5	731313356	731313356 [217-237]		2	2134.19	298.1	88.9		54.9	44.5			394.2	80.7	38.6		High	High	Not Found	Peak Found	Peak Found	Not Found	Not Found	High	Peak Found	Peak Found	High	7.23e-06	2.21e-06	3.42	37.64	Used	Used	R.VSGASKIIGVDLVSSRFEAAK.K	[217-237]
	FALSE	High	[K].YMNKELELDKFITHEVAFK.[D]		2.45193e-10	5.33751e-05	1	1	120	731313356	731313356 [339-357]		2	2355.21	73.4	61.2	131.6	80.9	52.7	252.4	119.2	39.6	89	100.1		High	High	High	High	High	High	High	High	High	High	High	7.23e-06	3.923e-11	8.38	95.87	Used	Used	K.YMNKELELDKFITHEVAFK.D	[339-357]
	FALSE	High	[K].YMNKELELDKFITHEVAFK.[D]	1xOxidation [M2]	6.509e-07	5.33751e-05	1	1	5	731313356	731313356 [339-357]		2	2371.2	17.7				96	10		55.5	13	807.7		Peak Found	Not Found	Not Found	Not Found	High	Peak Found	Not Found	Peak Found	Peak Found	High	High	7.23e-06	8.513e-08	6.68	33.29	Used	Used	K.YMNKELELDKFITHEVAFK.D	[339-357]
FALSE		High	Master Protein	-3719993087935976246	1412	731325197	PREDICTED: adenosylhomocysteinase [Beta vulgaris subsp. vulgaris]	MATSLSVEKTTSGREYKVKDMSQADFGRLEIELAEVEMPGLVSCRTEFGPSQPFKGAKITGSLHMTIQTAVLIETLTALGAEVRWCSCNIFSTQDHAAAAIARDSAAVFAWKGETLQEYWWCTERALDWGPGGGPDLIVDDGGDATLLIHEGVKAEEEFEKSGKIPDPTSTDNVEFQLVLGLIKESLKVDPKRYHKMKERLVGVSEETTTGVKRLYQMQANGTLLFPAINVNDSVTKSKFDNLYGCRHSLPDGLMRATDVMIAGKVGVVCGYGDVGKGCALALKAAGARVIVTEIDPICALQALMEGFQILTLEDVLAEGDIFVTTTGNKDIIMVDHMKKMKNNAIVCNIGHFDNEIDMHGLETYPGIKRITIKPQTDRFVFPETKSGVIILAEGRLMN…	>gi|731325197|ref|XP_010673385.1| PREDICTED: adenosylhomocysteinase [Beta vulgaris subsp. vulgaris]	0	828.009	90	61	2614	61	61	487	53.4	6.19	6738.96	90	2614	61	0	92.2	106	103.1	102.1	105.5	99.1	102.3	85.1	101.6	102.9	1.9907e+09	4.65296e+09	2.79749e+09	2.2787e+09	9.0198e+08	3.58063e+09	1.89477e+09	2.2191e+09	3.25112e+09	3.16827e+09	4.04563e+09	4.65296e+09	4.52427e+09	4.48065e+09	4.6274e+09
	Checked	Confidence	Annotated Sequence	Modifications	Qvality PEP	Qvality q-value	# Protein Groups	# Proteins	# PSMs	Master Protein Accessions	Positions in Master Proteins	Modifications in Master Proteins	# Missed Cleavages	Theo. MH+ [Da]	Abundances (Scaled): F1: Control	Abundances (Scaled): F2: Control	Abundances (Scaled): F3: Control	Abundances (Scaled): F4: Control	Abundances (Scaled): F5: Control	Abundances (Scaled): F6: Sample	Abundances (Scaled): F7: Sample	Abundances (Scaled): F8: Sample	Abundances (Scaled): F9: Sample	Abundances (Scaled): F10: Sample	Quan Info	Found in Sample: [S1] F1: Control	Found in Sample: [S2] F2: Control	Found in Sample: [S3] F3: Control	Found in Sample: [S4] F4: Control	Found in Sample: [S5] F5: Control	Found in Sample: [S6] F6: Sample	Found in Sample: [S7] F7: Sample	Found in Sample: [S8] F8: Sample	Found in Sample: [S9] F9: Sample	Found in Sample: [S10] F10: Sample	Confidence (by Search Engine): Sequest HT	Percolator q-Value (by Search Engine): Sequest HT	Percolator PEP (by Search Engine): Sequest HT	XCorr (by Search Engine): Sequest HT	Top Apex RT [min]	Quan Usage	Quan Ratio Usage	Sequence in Protein	Positions in Proteins
	FALSE	High	[R].ALDWGPGGGPDLIVDDGGDATLLIHEGVK.[A]		1.9438e-07	5.33751e-05	1	1	7	731325197	731325197 [126-154]		0	2887.45	78.6	210.6	248.8	36.2	30.7	117.1	52.5	90.1	101.6	33.8		High	Peak Found	High	High	High	High	High	Peak Found	High	Peak Found	High	7.23e-06	2.621e-08	3.9	68.35	Used	Used	R.ALDWGPGGGPDLIVDDGGDATLLIHEGVK.A	[126-154]
	FALSE	High	[R].ALDWGPGGGPDLIVDDGGDATLLIHEGVKAEEEFEK.[S]		1.42748e-12	5.33751e-05	1	1	150	731325197	731325197 [126-161]		1	3749.82	79.2	141.9	204.8	106.6	48.9	110.5	82.4	84.4	87.7	53.4		High	High	High	High	High	High	High	High	High	High	High	7.23e-06	2.604e-13	6.05	85.62	Used	Used	R.ALDWGPGGGPDLIVDDGGDATLLIHEGVKAEEEFEK.S	[126-161]
	FALSE	High	[R].ALDWGPGGGPDLIVDDGGDATLLIHEGVKAEEEFEKSGK.[I]		3.06039e-09	5.33751e-05	1	1	3	731325197	731325197 [126-164]		2	4021.97	153.1	260.6		90.5			29.4		286.9	179.5		Peak Found	High	Not Found	Peak Found	Not Found	Not Found	Peak Found	Not Found	High	High	High	7.23e-06	4.595e-10	7.77	82.97	Used	Used	R.ALDWGPGGGPDLIVDDGGDATLLIHEGVKAEEEFEKSGK.I	[126-164]
	FALSE	High	[R].ATDVMIAGK.[V]		0.00026006	9.51359e-05	1	1	8	731325197	731325197 [257-265]		0	905.476	34.4	59.5	23.2	10.9	69.8	197.9	248.2	128.1	135	92.8		Peak Found	Peak Found	High	Peak Found	High	High	High	Peak Found	High	Peak Found	High	1.696e-05	2.947e-05	1.64	10.72	Used	Used	R.ATDVMIAGK.V	[257-265]
	FALSE	High	[K].DIIMVDHMK.[K]		0.00515465	0.00046303	1	1	10	731325197	731325197 [331-339]		0	1101.54	38.1	45.1	168.9	71.4	192.6	70.1	95.9	69.7	95.7	152.5		Peak Found	High	High	Peak Found	Peak Found	Peak Found	High	High	High	High	High	6.022e-05	0.0005203	1.61	9.67	Used	Used	K.DIIMVDHMK.K	[331-339]
	FALSE	High	[K].DMSQADFGR.[L]		0.00258523	0.000222105	1	1	1	731325197	731325197 [20-28]		0	1026.43					41	365.9	350.4	47.2	195.4			Not Found	Not Found	Not Found	Not Found	Peak Found	Peak Found	High	Peak Found	Peak Found	Not Found	High	3.769e-05	0.0002619	1.72	11.69	Used	Used	K.DMSQADFGR.L	[20-28]
	FALSE	High	[K].DMSQADFGRLEIELAEVEMPGLVSCR.[T]	1xCarbamidomethyl [C25]	6.98877e-11	5.33751e-05	1	1	57	731325197	731325197 [20-45]		1	2952.39	43.8	188.3	266.1	118.8	33.9	46.7	97.4	79.5	77.4	48.1		High	High	High	High	High	High	High	High	High	High	High	7.23e-06	1.152e-11	5.21	91.01	Used	Used	K.DMSQADFGRLEIELAEVEMPGLVSCR.T	[20-45]
	FALSE	High	[K].DMSQADFGRLEIELAEVEMPGLVSCR.[T]	1xCarbamidomethyl [C25]; 1xOxidation [M]	8.67635e-05	5.33751e-05	1	1	4	731325197	731325197 [20-45]		1	2968.38			79.5	259.2	68.4		155	75.1		362.7		Not Found	High	Peak Found	High	Peak Found	Not Found	High	Peak Found	Not Found	High	High	7.23e-06	1.019e-05	2.96	76.76	Used	Used	K.DMSQADFGRLEIELAEVEMPGLVSCR.T	[20-45]
	FALSE	High	[K].DQSDYLSIPVEGPYKPAHYR.[Y]		9.9526e-08	5.33751e-05	1	1	75	731325197	731325197 [467-486]		0	2335.14	39.3	55.3	131.9	78.1	173.8	129.4	125.6	78	103.5	85.1		High	High	High	High	High	High	High	High	High	High	High	7.23e-06	1.364e-08	3.64	32.6	Used	Used	K.DQSDYLSIPVEGPYKPAHYR.Y	[467-486]
	FALSE	High	[K].DQSDYLSIPVEGPYKPAHYRY.[-]		1.87565e-08	5.33751e-05	1	1	177	731325197	731325197 [467-487]		1	2498.2	177.5	82.1	50.9	97.5	240.1	58.7	98.7	57.9	67.1	69.3		High	High	High	High	High	High	High	High	High	High	High	7.23e-06	2.687e-09	3.48	38.29	Used	Used	K.DQSDYLSIPVEGPYKPAHYRY.-	[467-487]
	FALSE	High	[R].DSAAVFAWK.[G]		6.28561e-05	5.33751e-05	1	1	85	731325197	731325197 [104-112]		0	994.499	43.5	96.6	77.7	70.3	70.1	124.9	83.7	163	137.9	132.3		High	High	High	High	High	High	High	High	High	High	High	7.23e-06	7.437e-06	3.2	34.9	Used	Used	R.DSAAVFAWK.G	[104-112]
	FALSE	High	[R].DSAAVFAWKGETLQEYWWCTER.[A]	1xCarbamidomethyl [C19]	0.000102939	5.33751e-05	1	1	11	731325197	731325197 [104-125]		1	2733.24	15.1	11.8	51.2	255.6	16.2			233.4	344.1	72.5		Peak Found	Peak Found	High	High	Peak Found	Not Found	Not Found	High	High	High	High	7.23e-06	1.212e-05	2.7	64.28	Used	Used	R.DSAAVFAWKGETLQEYWWCTER.A	[104-125]
	FALSE	High	[K].ERLVGVSEETTTGVKR.[L]		1.35013e-06	5.33751e-05	1	1	4	731325197	731325197 [199-214]		2	1760.95	383.5	108.2	153.6	189.1	41.4	12.5	3.9	48.6	12.3	46.9		High	Peak Found	Peak Found	Peak Found	Peak Found	Peak Found	Peak Found	Peak Found	Peak Found	Peak Found	High	7.23e-06	1.738e-07	6.12	9.7	Used	Used	K.ERLVGVSEETTTGVKR.L	[199-214]
	FALSE	High	[K].FDNLYGCR.[H]	1xCarbamidomethyl [C7]	0.0010597	0.000154279	1	1	23	731325197	731325197 [240-247]		0	1044.46	4.7	79.5	111.6	67.2	115.2	89.7	123.6	86.1	133.4	189		Peak Found	High	High	High	High	High	High	High	High	High	High	2.424e-05	0.0001118	2.05	13.32	Used	Used	K.FDNLYGCR.H	[240-247]
	FALSE	High	[R].FVFPETK.[S]		0.000450144	0.000126394	1	1	41	731325197	731325197 [380-386]		0	867.461	26.3	50.1	66	63.8	80.8	156.5	116.2	82.6	145.6	212		High	High	High	High	High	High	High	High	High	High	High	1.859e-05	4.961e-05	1.7	17.99	Used	Used	R.FVFPETK.S	[380-386]
	FALSE	High	[R].FVFPETKSGVIILAEGR.[L]	1xGG [K/S/T]	0.00146471	0.000154279	1	1	6	731325197	731325197 [380-396]		1	1977.08		137.4		58		493.4				311.1		Not Found	High	Not Found	Peak Found	Not Found	High	Not Found	Not Found	Not Found	Peak Found	High	2.424e-05	0.0001516	1.66	42.8	Used	Used	R.FVFPETKSGVIILAEGR.L	[380-396]
	FALSE	High	[K].GCALALK.[A]	1xCarbamidomethyl [C2]	0.0244726	0.0015326	1	1	12	731325197	731325197 [278-284]		0	732.407		17.7	72.7	5.9	44.1	280.3	236.3	44.1	122.1	176.8		Not Found	High	High	Peak Found	High	High	High	Peak Found	High	High	High	0.0002262	0.002524	2.22	10.74	Used	Used	K.GCALALK.A	[278-284]
	FALSE	High	[K].GETLQEYWWCTER.[A]	1xCarbamidomethyl [C10]	4.09587e-06	5.33751e-05	1	1	110	731325197	731325197 [113-125]		0	1757.76	6	77.8	61.6	128.1	123.7	202.1	112.2	94.4	87.8	106.3		High	High	High	High	High	High	High	High	High	High	High	7.23e-06	5.12e-07	3.88	50.07	Used	Used	K.GETLQEYWWCTER.A	[113-125]
	FALSE	High	[K].HLDEKVAALHLNK.[L]		4.88705e-08	5.33751e-05	1	1	45	731325197	731325197 [444-456]		1	1487.83	298.7	87	5.2	240.8	157.7	25.6	62.6	37.4	55.4	29.7		High	High	Peak Found	High	High	Peak Found	High	High	High	High	High	7.23e-06	6.841e-09	3.62	9.96	Used	Used	K.HLDEKVAALHLNK.L	[444-456]
	FALSE	High	[K].HLDEKVAALHLNK.[L]	1xGG [K5]	0.0051964	0.00046303	1	1	2	731325197	731325197 [444-456]		1	1601.88	17.5	70.8	250.9		11.3	290.5	145.7		172.1	41.2		Peak Found	Peak Found	High	Not Found	Peak Found	Peak Found	Peak Found	Not Found	Peak Found	Peak Found	High	6.022e-05	0.0005224	1.81	10.75	Used	Used	K.HLDEKVAALHLNK.L	[444-456]
	FALSE	High	[K].HLDEKVAALHLNKLGAK.[L]		2.90783e-09	5.33751e-05	1	1	13	731325197	731325197 [444-460]		2	1857.07	448.5		159.3	106	162.9	0.2	18.6	36.1	34.2	34.3		High	Not Found	Peak Found	High	High	Peak Found	Peak Found	High	Peak Found	Peak Found	High	7.23e-06	4.358e-10	4.7	15.93	Used	Used	K.HLDEKVAALHLNKLGAK.L	[444-460]
	FALSE	High	[R].HSLPDGLMR.[A]		9.39666e-05	5.33751e-05	1	1	53	731325197	731325197 [248-256]		0	1025.52	45.6	89.3	166.7	103.2	128.1	80.4	115.5	64.9	87.2	119.2		High	High	High	High	High	High	High	High	High	High	High	7.23e-06	1.106e-05	2.84	9.66	Used	Used	R.HSLPDGLMR.A	[248-256]
	FALSE	High	[R].HSLPDGLMR.[A]	1xOxidation [M8]	0.13392	0.0063944	1	1	2	731325197	731325197 [248-256]		0	1041.51	6.7	16.1	134.9	28.9	40	205	206.2	73.9	144.5	143.8		Peak Found	Peak Found	Peak Found	Peak Found	Peak Found	Peak Found	Peak Found	High	Peak Found	High	High	0.0009171	0.01524	1.13	10.11	Used	Used	R.HSLPDGLMR.A	[248-256]
	FALSE	High	[K].KVYVLPK.[H]		0.00944121	0.000655491	1	1	44	731325197	731325197 [437-443]		1	846.545	149	112.8	40.6	5.8	59.6	105.2	165.8	114.8	206.8	39.5		High	High	High	High	High	High	High	High	High	High	High	9.745e-05	0.0009642	2.73	9.37	Used	Used	K.KVYVLPK.H	[437-443]
	FALSE	High	[K].KVYVLPK.[H]	1xGG [K1]	0.018237	0.001191	1	1	3	731325197	731325197 [437-443]		1	960.588	18.6	75.7	491.3			144.3	166.9	34.4	68.8			Peak Found	High	High	Not Found	Not Found	Peak Found	Peak Found	Peak Found	Peak Found	Not Found	High	0.0001779	0.001873	2.08	10.36	Used	Used	K.KVYVLPK.H	[437-443]
	FALSE	High	[R].LEIELAEVEMPGLVSCR.[T]	1xCarbamidomethyl [C16]	7.48286e-07	5.33751e-05	1	1	6	731325197	731325197 [29-45]		0	1944.98		265.8	203.5	167.6	24.1	54.4	121.9	22.2	131.8	8.7		Not Found	High	High	High	Peak Found	Peak Found	Peak Found	Peak Found	High	Peak Found	High	7.23e-06	9.751e-08	2.84	67.87	Used	Used	R.LEIELAEVEMPGLVSCR.T	[29-45]
	FALSE	High	[R].LMNLGCATGHPSFVMSCSFTNQVIAQLELWNEK.[A]	2xCarbamidomethyl [C6; C17]	4.49401e-06	5.33751e-05	1	1	24	731325197	731325197 [397-429]		0	3782.78		164.7	78.7	92.8	54.7	145.2	133.3	100.2	140.1	90.4		Not Found	High	High	High	High	High	High	High	High	High	High	7.23e-06	5.6e-07	4.98	110.53	Used	Used	R.LMNLGCATGHPSFVMSCSFTNQVIAQLELWNEK.A	[397-429]
	FALSE	High	[R].LMNLGCATGHPSFVMSCSFTNQVIAQLELWNEKASGKYEK.[K]	2xCarbamidomethyl [C6; C17]	1.36097e-08	5.33751e-05	1	1	11	731325197	731325197 [397-436]		2	4546.17	145.7	121.3	99.5	106.9	27.4	23.2	118.8	68.9	236.2	52.1		Peak Found	High	High	High	Peak Found	High	High	High	High	High	High	7.23e-06	1.967e-09	4.54	84.22	Used	Used	R.LMNLGCATGHPSFVMSCSFTNQVIAQLELWNEKASGKYEK.K	[397-436]
	FALSE	High	[K].IPDPTSTDNVEFQLVLGLIK.[E]		1.04085e-09	5.33751e-05	1	1	27	731325197	731325197 [165-184]		0	2199.19	50.4	124.2	304.1	23.6	20.7	103.7	83.1	140.6	70.9	78.6		High	High	High	High	Peak Found	High	High	High	High	High	High	7.23e-06	1.604e-10	4.84	104.11	Used	Used	K.IPDPTSTDNVEFQLVLGLIK.E	[165-184]
	FALSE	High	[K].IPDPTSTDNVEFQLVLGLIKESLK.[V]		6.35894e-10	5.33751e-05	1	1	1	731325197	731325197 [165-188]		1	2656.44					621.8					378.2		Not Found	Not Found	Not Found	Not Found	Peak Found	Not Found	Not Found	Not Found	Not Found	High	High	7.23e-06	9.929e-11	4.57	100.82	Used	Used	K.IPDPTSTDNVEFQLVLGLIKESLK.V	[165-188]
	FALSE	High	[K].IPDPTSTDNVEFQLVLGLIKESLKVDPK.[R]		5.16741e-08	5.33751e-05	1	1	15	731325197	731325197 [165-192]		2	3095.69	177.4	96.3	295.7	87	44.8	37	41.7	72.6	84.9	62.7		High	High	High	High	Peak Found	Peak Found	High	High	High	High	High	7.23e-06	7.207e-09	5.07	104.67	Used	Used	K.IPDPTSTDNVEFQLVLGLIKESLKVDPK.R	[165-192]
	FALSE	High	[K].ITGSLHMTIQTAVLIETLTALGAEVR.[W]		2.33712e-09	5.33751e-05	1	1	23	731325197	731325197 [59-84]		0	2738.51	58.6	32.9	97.6	126.9	8	42	80.6	356.1	109	88.3		Peak Found	High	Peak Found	High	Peak Found	High	High	High	High	High	High	7.23e-06	3.526e-10	4.97	91.77	Used	Used	K.ITGSLHMTIQTAVLIETLTALGAEVR.W	[59-84]
	FALSE	High	[K].ITGSLHMTIQTAVLIETLTALGAEVR.[W]	1xOxidation [M7]	0.0197068	0.00124898	1	1	1	731325197	731325197 [59-84]		0	2754.51								1000				Not Found	Not Found	Not Found	Not Found	Not Found	Not Found	Not Found	High	Not Found	Not Found	High	0.0001893	0.002037	0.96	89.07	Used	Used	K.ITGSLHMTIQTAVLIETLTALGAEVR.W	[59-84]
	FALSE	High	[K].LTKDQSDYLSIPVEGPYKPAHYR.[Y]		1.70657e-07	5.33751e-05	1	1	33	731325197	731325197 [464-486]		1	2677.36	45.4	68.1	95.5	171	66.8	168.7	99	82	99.6	103.7		Peak Found	High	High	High	High	High	High	High	High	High	High	7.23e-06	2.309e-08	5.15	25.11	Used	Used	K.LTKDQSDYLSIPVEGPYKPAHYR.Y	[464-486]
	FALSE	High	[K].LTKDQSDYLSIPVEGPYKPAHYRY.[-]		3.48584e-09	5.33751e-05	1	1	95	731325197	731325197 [464-487]		2	2840.43	187.7	79.9	31	139.7	208.3	82.9	70	79.7	57.5	63.3		High	High	High	High	High	High	High	High	High	High	High	7.23e-06	5.2e-10	4.67	32	Used	Used	K.LTKDQSDYLSIPVEGPYKPAHYRY.-	[464-487]
	FALSE	High	[R].ITIKPQTDR.[F]		0.000315132	0.000126394	1	1	14	731325197	731325197 [371-379]		0	1071.62	44.3		3.2	1	10.6	380.8	244.9	124.7	154.5	36.1		High	Not Found	High	Peak Found	Peak Found	High	High	High	High	High	High	1.859e-05	3.544e-05	1.89	10.03	Used	Used	R.ITIKPQTDR.F	[371-379]
	FALSE	High	[R].ITIKPQTDRFVFPETK.[S]		7.20946e-06	5.33751e-05	1	1	132	731325197	731325197 [371-386]		1	1920.06	41.6	94	104.5	108.6	268.2	77.9	91.3	47.7	79.5	86.6		High	High	High	High	High	High	High	High	High	High	High	7.23e-06	8.912e-07	3	24.9	Used	Used	R.ITIKPQTDRFVFPETK.S	[371-386]
	FALSE	High	[R].ITIKPQTDRFVFPETKSGVIILAEGR.[L]		0.000246122	9.51359e-05	1	1	1	731325197	731325197 [371-396]		2	2915.64	1000											High	Not Found	Not Found	Not Found	Not Found	Not Found	Not Found	Not Found	Not Found	Not Found	High	1.696e-05	2.797e-05	4.45	46.48	Used	Used	R.ITIKPQTDRFVFPETKSGVIILAEGR.L	[371-396]
	FALSE	High	[R].LVGVSEETTTGVK.[R]		8.59529e-06	5.33751e-05	1	1	22	731325197	731325197 [201-213]		0	1319.71	206.9	140	6.7	56	66.3	63.2	98.4	104.5	88.3	169.6		High	High	High	Peak Found	High	High	High	High	High	High	High	7.23e-06	1.054e-06	2.4	13.44	Used	Used	R.LVGVSEETTTGVK.R	[201-213]
	FALSE	High	[R].LVGVSEETTTGVKR.[L]		5.04073e-07	5.33751e-05	1	1	100	731325197	731325197 [201-214]		1	1475.81	197.1	151.3	36.2	65.6	71.7	78.2	92.1	90.5	104.6	112.8		High	High	High	High	High	High	High	High	High	High	High	7.23e-06	6.634e-08	3.98	10.77	Used	Used	R.LVGVSEETTTGVKR.L	[201-214]
	FALSE	High	[R].LVGVSEETTTGVKR.[L]	1xGG [K/T]	3.76772e-06	5.33751e-05	1	1	12	731325197	731325197 [201-214]		1	1589.85	19.8	92.9	476.6	3.4	14.2	136.2	45.3	46.6	61.1	103.9		High	High	High	Peak Found	Peak Found	High	Peak Found	Peak Found	Peak Found	Peak Found	High	7.23e-06	4.716e-07	3.71	10.32	Used	Used	R.LVGVSEETTTGVKR.L	[201-214]
	FALSE	High	[R].LVGVSEETTTGVKRLYQMQANGTLLFPAINVNDSVTK.[S]		3.94614e-05	5.33751e-05	1	1	11	731325197	731325197 [201-237]		2	3994.1		0.8		415.2	15.7		5.9	382.2	19.8	160.4		Not Found	Peak Found	Not Found	High	Peak Found	Not Found	Peak Found	High	Peak Found	High	High	7.23e-06	4.689e-06	4.16	59.94	Used	Used	R.LVGVSEETTTGVKRLYQMQANGTLLFPAINVNDSVTK.S	[201-237]
	FALSE	High	[R].LVGVSEETTTGVKRLYQMQANGTLLFPAINVNDSVTK.[S]	1xOxidation [M18]	0.000405597	0.000126394	1	1	1	731325197	731325197 [201-237]		2	4010.09											No Quan Values	Not Found	Not Found	Not Found	High	Not Found	Not Found	Not Found	Not Found	Not Found	Not Found	High	1.859e-05	4.499e-05	3.92		Not Used	Not Used	R.LVGVSEETTTGVKRLYQMQANGTLLFPAINVNDSVTK.S	[201-237]
	FALSE	High	[R].LYQMQANGTLLFPAINVNDSVTK.[S]		1.17992e-06	5.33751e-05	1	1	42	731325197	731325197 [215-237]		0	2537.31	234.4	242.9	13.8	113.5	49.4	27.6	30.4	140.9	84.5	62.5		High	High	High	High	High	High	High	High	High	High	High	7.23e-06	1.52e-07	4.83	65.85	Used	Used	R.LYQMQANGTLLFPAINVNDSVTK.S	[215-237]
	FALSE	High	[R].LYQMQANGTLLFPAINVNDSVTK.[S]	1xOxidation [M4]	3.23611e-05	5.33751e-05	1	1	9	731325197	731325197 [215-237]		0	2553.3	42.7	15.5		146.1	199.8	15.4		92.9	186.8	300.8		Peak Found	Peak Found	Not Found	High	High	Peak Found	Not Found	High	High	High	High	7.23e-06	3.867e-06	3.27	50.64	Used	Used	R.LYQMQANGTLLFPAINVNDSVTK.S	[215-237]
	FALSE	High	[-].MATSLSVEK.[T]	1xMet-loss+Acetyl [N-Term]	0.000326712	0.000126394	1	1	40	731325197	731325197 [1-9]	731325197 1xMet-loss+Acetyl [N-Term]	0	876.467	68.7	113.1	12.4	24.8	33.9	125.6	191.2	86.5	170.4	173.3		High	High	High	High	High	High	High	High	High	High	High	1.859e-05	3.658e-05	1.98	12.47	Used	Used	-.MATSLSVEK.T	[1-9]
	FALSE	High	[-].MATSLSVEKTTSGR.[E]	1xMet-loss+Acetyl [N-Term]	2.39062e-06	5.33751e-05	1	1	22	731325197	731325197 [1-14]	731325197 1xMet-loss+Acetyl [N-Term]	1	1378.72	211.9	80.1		59.5	65.7		170.7	135.3	138.9	137.9		High	High	Not Found	High	High	Not Found	High	High	High	High	High	7.23e-06	3.025e-07	4.04	11.86	Used	Used	-.MATSLSVEKTTSGR.E	[1-14]
	FALSE	High	[-].MATSLSVEKTTSGR.[E]	1xGG [K/S/T]; 1xMet-loss+Acetyl [N-Term]	3.85615e-06	5.33751e-05	1	1	24	731325197	731325197 [1-14]	731325197 1xMet-loss+Acetyl [N-Term]	1	1492.76	2.4	23.9	208.6	0.8	2.9	250.4	137.1	49.7	96.5	227.9		High	High	High	Peak Found	High	High	High	High	High	High	High	7.23e-06	4.821e-07	2.58	11.69	Used	Used	-.MATSLSVEKTTSGR.E	[1-14]
	FALSE	High	[-].MATSLSVEKTTSGREYK.[V]	1xMet-loss+Acetyl [N-Term]	1.34637e-07	5.33751e-05	1	1	27	731325197	731325197 [1-17]	731325197 1xMet-loss+Acetyl [N-Term]	2	1798.92	245.3	47.4		136.4	72.7	17.7	96.4	177.4	108.2	98.4		High	High	Not Found	High	High	Peak Found	High	High	High	High	High	7.23e-06	1.838e-08	5.31	12.33	Used	Used	-.MATSLSVEKTTSGREYK.V	[1-17]
	FALSE	High	[-].MATSLSVEKTTSGREYK.[V]	1xGG [K9]; 1xMet-loss+Acetyl [N-Term]	2.10889e-06	5.33751e-05	1	1	9	731325197	731325197 [1-17]	731325197 1xMet-loss+Acetyl [N-Term]	2	1912.96	19.4	246.7	128.2			74.7	103.8	64	124.7	238.4		High	High	High	Not Found	Not Found	Peak Found	High	High	High	High	High	7.23e-06	2.678e-07	4.7	11.3	Used	Used	-.MATSLSVEKTTSGREYK.V	[1-17]
	FALSE	High	[K].MKNNAIVCNIGHFDNEIDMHGLETYPGIK.[R]	1xCarbamidomethyl [C8]	6.04252e-07	5.33751e-05	1	1	8	731325197	731325197 [341-369]		1	3330.57	27.7	54.6	226.6	308.4	12.1	99.4	118.1	68	24.8	60.4		Peak Found	Peak Found	High	High	Peak Found	High	High	Peak Found	High	High	High	7.23e-06	7.94e-08	3.13	106.82	Used	Used	K.MKNNAIVCNIGHFDNEIDMHGLETYPGIK.R	[341-369]
	FALSE	High	[K].MKNNAIVCNIGHFDNEIDMHGLETYPGIKR.[I]	1xCarbamidomethyl [C8]	1.69042e-10	5.33751e-05	1	1	45	731325197	731325197 [341-370]		2	3486.67	16.8	45.6	103.2	178.4	155.5	142.7	83	117.6	100.9	56.2		High	High	High	High	High	High	High	High	High	High	High	7.23e-06	2.727e-11	4.43	41.5	Used	Used	K.MKNNAIVCNIGHFDNEIDMHGLETYPGIKR.I	[341-370]
	FALSE	High	[K].NNAIVCNIGHFDNEIDMHGLETYPGIK.[R]	1xCarbamidomethyl [C6]	4.84182e-08	5.33751e-05	1	1	31	731325197	731325197 [343-369]		0	3071.43	42.4	93.2	126.3	97.9	176.1	92.1	87.8	125.9	104.4	54		High	High	High	High	High	High	High	High	High	High	High	7.23e-06	6.771e-09	4.41	53.26	Used	Used	K.NNAIVCNIGHFDNEIDMHGLETYPGIK.R	[343-369]
	FALSE	High	[K].NNAIVCNIGHFDNEIDMHGLETYPGIKR.[I]	1xCarbamidomethyl [C6]	8.2498e-10	5.33751e-05	1	1	84	731325197	731325197 [343-370]		1	3227.54	22.4	100.9	129	258.6	26.2	127	100.6	60.4	88.1	86.7		High	High	High	High	High	High	High	High	High	High	High	7.23e-06	1.277e-10	4.8	106.25	Used	Used	K.NNAIVCNIGHFDNEIDMHGLETYPGIKR.I	[343-370]
	FALSE	High	[K].NNAIVCNIGHFDNEIDMHGLETYPGIKR.[I]	1xCarbamidomethyl [C6]; 1xOxidation [M17]	0.00036161	0.000126394	1	1	4	731325197	731325197 [343-370]		1	3243.53										1000		Not Found	Not Found	Not Found	Not Found	Not Found	Not Found	Not Found	Not Found	Not Found	High	High	1.859e-05	4.027e-05	2.73	39.25	Used	Used	K.NNAIVCNIGHFDNEIDMHGLETYPGIKR.I	[343-370]
	FALSE	High	[K].RITIKPQTDRFVFPETK.[S]		1.11332e-05	5.33751e-05	1	1	26	731325197	731325197 [370-386]		2	2076.16	34.8	105.3	69.8	245.7	204.6	98.7	59.8	28.6	59.6	93		High	High	Peak Found	High	High	High	High	High	High	High	High	7.23e-06	1.36e-06	5.61	106.89	Used	Used	K.RITIKPQTDRFVFPETK.S	[370-386]
	FALSE	High	[K].RLYQMQANGTLLFPAINVNDSVTK.[S]		7.68285e-09	5.33751e-05	1	1	23	731325197	731325197 [214-237]		1	2693.41	122	197.3	101.7	221.2	17	22.1	44.1	132.7	78.7	63.2		High	High	High	High	High	Peak Found	Peak Found	High	High	High	High	7.23e-06	1.128e-09	5.82	53.35	Used	Used	K.RLYQMQANGTLLFPAINVNDSVTK.S	[214-237]
	FALSE	High	[K].SGKIPDPTSTDNVEFQLVLGLIK.[E]		5.80424e-08	5.33751e-05	1	1	74	731325197	731325197 [162-184]		1	2471.34	77.1	116.7	269.5	58.5	29.3	103.8	103.5	105.8	95.5	40.2		High	High	High	High	High	High	High	High	High	High	High	7.23e-06	8.073e-09	4.66	104.43	Used	Used	K.SGKIPDPTSTDNVEFQLVLGLIK.E	[162-184]
	FALSE	High	[K].SGKIPDPTSTDNVEFQLVLGLIKESLK.[V]		3.19115e-09	5.33751e-05	1	1	24	731325197	731325197 [162-188]		2	2928.59	185.7	122.9	218.7	82.9	51.3	81.5	160.5	31.8	30.7	34		High	High	High	High	Peak Found	High	Peak Found	High	High	Peak Found	High	7.23e-06	4.782e-10	6.35	103.38	Used	Used	K.SGKIPDPTSTDNVEFQLVLGLIKESLK.V	[162-188]
	FALSE	High	[K].SGVIILAEGR.[L]		5.41412e-05	5.33751e-05	1	1	120	731325197	731325197 [387-396]		0	1014.59	97.2	122.2	51.8	63.2	88.9	87.5	74.3	139.4	130.1	145.5		High	High	High	High	High	High	High	High	High	High	High	7.23e-06	6.405e-06	3.14	23.17	Used	Used	K.SGVIILAEGR.L	[387-396]
	FALSE	High	[K].SKFDNLYGCR.[H]	1xCarbamidomethyl [C9]	9.87748e-05	5.33751e-05	1	1	134	731325197	731325197 [238-247]		1	1259.58	29.5	94.7	155.9	150.6	106.5	85.9	108.3	65.6	86.8	116.4		High	High	High	High	High	High	High	High	High	High	High	7.23e-06	1.161e-05	2.39	11.67	Used	Used	K.SKFDNLYGCR.H	[238-247]
	FALSE	High	[R].TEFGPSQPFK.[G]		0.000323765	0.000126394	1	1	24	731325197	731325197 [46-55]		0	1137.56	1.5	56.9	227.2	21.1	21.7	91.5	79.1	52.6	177.2	271.2		Peak Found	Peak Found	High	High	Peak Found	High	High	High	High	High	High	1.859e-05	3.639e-05	2.74	16.09	Used	Used	R.TEFGPSQPFK.G	[46-55]
	FALSE	High	[R].TEFGPSQPFKGAK.[I]		2.00591e-05	5.33751e-05	1	1	59	731325197	731325197 [46-58]		1	1393.71	44.4	103.6	158.1	88.5	107.6	100.3	106.5	53	99.8	138.1		High	High	High	High	High	High	High	High	High	High	High	7.23e-06	2.422e-06	2.8	11.49	Used	Used	R.TEFGPSQPFKGAK.I	[46-58]
	FALSE	High	[R].TEFGPSQPFKGAK.[I]	1xGG [K10]	0.000323765	0.000126394	1	1	7	731325197	731325197 [46-58]		1	1507.75	2	84.1	271.3	11.2	5	219.7	176.3	22.4	78	129.9		Peak Found	High	High	Peak Found	Peak Found	High	Peak Found	High	Peak Found	Peak Found	High	1.859e-05	3.633e-05	1.5	11.96	Used	Used	R.TEFGPSQPFKGAK.I	[46-58]
	FALSE	High	[K].VAALHLNK.[L]		0.000334236	0.000126394	1	1	10	731325197	731325197 [449-456]		0	865.525	1.2		0.5	5.2	81.7	835.5	74.4		1.5			Peak Found	Not Found	Peak Found	Peak Found	Peak Found	High	High	Not Found	Peak Found	Not Found	High	1.859e-05	3.748e-05	1.75	10.41	Used	Used	K.VAALHLNK.L	[449-456]
	FALSE	High	[K].VAALHLNKLGAK.[L]		9.47539e-05	5.33751e-05	1	1	12	731325197	731325197 [449-460]		1	1234.76	360.6	2.4	0	182.6	155.6	22.8	50	73.7	96.8	55.4		High	Peak Found	Peak Found	High	Peak Found	Peak Found	Peak Found	High	High	High	High	7.23e-06	1.114e-05	2.53	10.97	Used	Used	K.VAALHLNKLGAK.L	[449-460]
	FALSE	High	[K].VAALHLNKLGAK.[L]	1xGG [K8]	0.000609139	0.000126394	1	1	1	731325197	731325197 [449-460]		1	1348.81			1000									Not Found	Not Found	High	Not Found	Not Found	Not Found	Not Found	Not Found	Not Found	Not Found	High	1.859e-05	6.612e-05	1.52	10.55	Used	Used	K.VAALHLNKLGAK.L	[449-460]
	FALSE	High	[K].VGVVCGYGDVGK.[G]	1xCarbamidomethyl [C5]	4.68555e-06	5.33751e-05	1	1	25	731325197	731325197 [266-277]		0	1209.59	5.6	100.5	0.9	47.9	80.9	178.9	134	96.5	143.1	211.8		Peak Found	High	Peak Found	High	High	High	High	High	High	High	High	7.23e-06	5.855e-07	3.06	13.15	Used	Used	K.VGVVCGYGDVGK.G	[266-277]
	FALSE	High	[K].VGVVCGYGDVGKGCALALK.[A]	2xCarbamidomethyl [C5; C14]	5.29675e-09	5.33751e-05	1	1	62	731325197	731325197 [266-284]		1	1922.98	38.7	113.5	62.9	109	158.1	90.4	81.6	111.3	122.3	112.2		Peak Found	High	High	High	High	High	High	High	High	High	High	7.23e-06	7.85e-10	6.85	26.94	Used	Used	K.VGVVCGYGDVGKGCALALK.A	[266-284]
	FALSE	High	[K].VGVVCGYGDVGKGCALALKAAGAR.[V]	2xCarbamidomethyl [C5; C14]	8.67515e-06	5.33751e-05	1	1	1	731325197	731325197 [266-289]		2	2349.22			130.9	869.1								Not Found	Not Found	Peak Found	High	Not Found	Not Found	Not Found	Not Found	Not Found	Not Found	High	7.23e-06	1.067e-06	2.51	26.23	Used	Used	K.VGVVCGYGDVGKGCALALKAAGAR.V	[266-289]
	FALSE	High	[K].VKDMSQADFGR.[L]		0.00180885	0.00019222	1	1	2	731325197	731325197 [18-28]		1	1253.59	55.3	57	231.1	138.1	114.1	3		102.4	175.4	123.6		Peak Found	High	High	Peak Found	Peak Found	Peak Found	Not Found	Peak Found	Peak Found	Peak Found	High	2.806e-05	0.000186	2.21	10.26	Used	Used	K.VKDMSQADFGR.L	[18-28]
	FALSE	High	[K].VKDMSQADFGRLEIELAEVEMPGLVSCR.[T]	1xCarbamidomethyl [C27]	7.77742e-11	5.33751e-05	1	1	76	731325197	731325197 [18-45]		2	3179.55	58.9	176.4	220	181.3	22.4	47.7	75.4	73.3	121.8	22.7		High	High	High	High	High	High	High	High	High	High	High	7.23e-06	1.282e-11	7.43	108.46	Used	Used	K.VKDMSQADFGRLEIELAEVEMPGLVSCR.T	[18-45]
	FALSE	High	[K].VKDMSQADFGRLEIELAEVEMPGLVSCR.[T]	1xCarbamidomethyl [C27]; 1xOxidation [M21]	0.000395866	0.000126394	1	1	5	731325197	731325197 [18-45]		2	3195.55		43.8	19.3	69.2	89.5	232.5	10.2	44.1	39.8	451.6		Not Found	Peak Found	Peak Found	High	Peak Found	High	Peak Found	High	Peak Found	High	High	1.859e-05	4.393e-05	3.34	62.67	Used	Used	K.VKDMSQADFGRLEIELAEVEMPGLVSCR.T	[18-45]
	FALSE	High	[K].VKDMSQADFGRLEIELAEVEMPGLVSCR.[T]	1xCarbamidomethyl [C27]; 2xOxidation [M4; M21]	0.00673761	0.000491899	1	1	1	731325197	731325197 [18-45]		2	3211.54				454.4	344.8					200.8		Not Found	Not Found	Not Found	Peak Found	Peak Found	Not Found	Not Found	Not Found	Not Found	High	High	6.94e-05	0.000681	2.79	74.69	Used	Used	K.VKDMSQADFGRLEIELAEVEMPGLVSCR.T	[18-45]
	FALSE	High	[K].VYVLPK.[H]		0.118421	0.00568118	1	1	43	731325197	731325197 [438-443]		0	718.45	39.2	41.5	94.2	80.3	57.1	126.4	174.6	62.6	154.3	169.8		High	High	High	High	High	High	High	High	High	High	High	0.0008214	0.01322	1.64	12.52	Used	Used	K.VYVLPK.H	[438-443]
	FALSE	High	[R].WCSCNIFSTQDHAAAAIAR.[D]	2xCarbamidomethyl [C2; C4]	3.755e-09	5.33751e-05	1	1	65	731325197	731325197 [85-103]		0	2178.98		131.7	199.8	104.7	154.2	119.5	78	69.8	76.7	65.6		Not Found	High	High	High	High	High	High	High	High	High	High	7.23e-06	5.606e-10	5.21	32.77	Used	Used	R.WCSCNIFSTQDHAAAAIAR.D	[85-103]
FALSE		High	Master Protein	3438500406466120006	3218	731341013	PREDICTED: ATP synthase subunit beta, mitochondrial [Beta vulgaris subsp. vulgaris]	MASRRLIPSFARALRRSSRPSSLSTPKPSAHHRPSARGYLLNRVADYATSSAAAAQPSSSPAKSGSEGAGKITDEFTGKGSVGKVCQVIGAVVDVRFDEGLPPILTALEVLDNETRLVLEVAQHLGENMVRTIAMDGTEGLVRGQRVLNTGSPITIPVGRVTLGRIMNVIGEPIDHRGELKTDHYLPIHREAPAFVEQATEQQILVTGIKVVDLLAPYQRGGKIGLFGGAGVGKTVLIMELINNVAKAHGGFSVFAGVGERTREGNDLYREMIESGVIKLGDQQADSKCALVYGQMNEPPGARARVGLTGLTVAEHFRDAEGQDVLLFIDNIFRFTQANSEVSALLGRIPSAVGYQPTLATDLGGLQERITTTKKGSITSVQAIYVPADDLTDPAPATT…	>gi|731341013|ref|XP_010681700.1| PREDICTED: ATP synthase subunit beta, mitochondrial [Beta vulgaris subsp. vulgaris]	0	801.169	85	52	2665	52	52	552	59.4	6.43	6644.08	85	2665	52	0	116.3	112.4	87.4	110.1	117.1	83.5	88.2	101.5	96.7	86.7	2.30036e+09	4.51969e+09	2.17364e+09	2.25171e+09	9.17579e+08	2.76302e+09	1.49535e+09	2.42615e+09	2.83346e+09	2.44645e+09	4.67493e+09	4.51969e+09	3.51534e+09	4.42757e+09	4.70742e+09
	Checked	Confidence	Annotated Sequence	Modifications	Qvality PEP	Qvality q-value	# Protein Groups	# Proteins	# PSMs	Master Protein Accessions	Positions in Master Proteins	Modifications in Master Proteins	# Missed Cleavages	Theo. MH+ [Da]	Abundances (Scaled): F1: Control	Abundances (Scaled): F2: Control	Abundances (Scaled): F3: Control	Abundances (Scaled): F4: Control	Abundances (Scaled): F5: Control	Abundances (Scaled): F6: Sample	Abundances (Scaled): F7: Sample	Abundances (Scaled): F8: Sample	Abundances (Scaled): F9: Sample	Abundances (Scaled): F10: Sample	Quan Info	Found in Sample: [S1] F1: Control	Found in Sample: [S2] F2: Control	Found in Sample: [S3] F3: Control	Found in Sample: [S4] F4: Control	Found in Sample: [S5] F5: Control	Found in Sample: [S6] F6: Sample	Found in Sample: [S7] F7: Sample	Found in Sample: [S8] F8: Sample	Found in Sample: [S9] F9: Sample	Found in Sample: [S10] F10: Sample	Confidence (by Search Engine): Sequest HT	Percolator q-Value (by Search Engine): Sequest HT	Percolator PEP (by Search Engine): Sequest HT	XCorr (by Search Engine): Sequest HT	Top Apex RT [min]	Quan Usage	Quan Ratio Usage	Sequence in Protein	Positions in Proteins
	FALSE	High	[K].AHGGFSVFAGVGER.[T]		2.52761e-06	5.33751e-05	1	1	136	731341013	731341013 [248-261]		0	1390.69	126.5	119.4	72.9	90.1	98.3	122.1	84.9	114.2	79	92.6		High	High	High	High	High	High	High	High	High	High	High	7.23e-06	3.194e-07	2.61	26.17	Used	Used	K.AHGGFSVFAGVGER.T	[248-261]
	FALSE	High	[R].ARVGLTGLTVAEHFRDAEGQDVLLFIDNIFR.[F]		1.55739e-08	5.33751e-05	1	1	17	731341013	731341013 [304-334]		2	3472.83	8.1	71.7	57.1	176.3	294.7	13.4	127.6	104.8	102.1	44.2		High	High	High	High	High	Peak Found	High	High	High	High	High	7.23e-06	2.239e-09	2.51	110.13	Used	Used	R.ARVGLTGLTVAEHFRDAEGQDVLLFIDNIFR.F	[304-334]
	FALSE	High	[K].CALVYGQMNEPPGAR.[A]	1xCarbamidomethyl [C1]	9.75239e-07	5.33751e-05	1	1	70	731341013	731341013 [289-303]		0	1662.77	46.5	137.9	23.9	52.6	62.2	102.5	155.9	138.1	146.3	133.9		High	High	High	High	High	High	High	High	High	High	High	7.23e-06	1.263e-07	2.96	22.75	Used	Used	K.CALVYGQMNEPPGAR.A	[289-303]
	FALSE	High	[K].CALVYGQMNEPPGAR.[A]	1xCarbamidomethyl [C1]; 1xOxidation [M8]	1.57283e-05	5.33751e-05	1	1	2	731341013	731341013 [289-303]		0	1678.77			82			48.2				869.8		Not Found	Not Found	Peak Found	Not Found	Not Found	Peak Found	Not Found	Not Found	Not Found	High	High	7.23e-06	1.906e-06	2.51	12.7	Used	Used	K.CALVYGQMNEPPGAR.A	[289-303]
	FALSE	High	[R].DAEGQDVLLFIDNIFR.[F]		7.20975e-07	5.33751e-05	1	1	36	731341013	731341013 [319-334]		0	1864.94	20.5	26	297.3	53.5	147.2	41.3	161.7	96	87.1	69.4		High	High	High	High	High	High	High	High	High	High	High	7.23e-06	9.423e-08	2.35	105.05	Used	Used	R.DAEGQDVLLFIDNIFR.F	[319-334]
	FALSE	High	[R].EAPAFVEQATEQQILVTGIK.[V]		2.25896e-08	5.33751e-05	1	1	94	731341013	731341013 [191-210]		0	2172.15	90.3	153.2	7.8	91.7	51	73.8	33.4	278.9	124	95.9		High	High	High	High	High	High	High	High	High	High	High	7.23e-06	3.22e-09	3.98	55.21	Used	Used	R.EAPAFVEQATEQQILVTGIK.V	[191-210]
	FALSE	High	[R].EAPAFVEQATEQQILVTGIKVVDLLAPYQR.[G]		2.00809e-07	5.33751e-05	1	1	21	731341013	731341013 [191-220]		1	3326.8	189.4	121.9	16.4	67.6	195.2	1.1	93.2	174.4	110.1	30.8		High	High	Peak Found	High	High	Peak Found	High	High	High	High	High	7.23e-06	2.708e-08	3.06	101.98	Used	Used	R.EAPAFVEQATEQQILVTGIKVVDLLAPYQR.G	[191-220]
	FALSE	High	[R].EGNDLYREMIESGVIK.[L]		2.99623e-05	5.33751e-05	1	1	36	731341013	731341013 [264-279]		1	1852.91	127.9	155.1	68.8	34.3	44	109.4	104.5	145.4	113	97.8		High	High	High	High	High	High	High	High	High	High	High	7.23e-06	3.587e-06	2.57	48.42	Used	Used	R.EGNDLYREMIESGVIK.L	[264-279]
	FALSE	High	[R].EGNDLYREMIESGVIKLGDQQADSK.[C]		1.39549e-05	5.33751e-05	1	1	10	731341013	731341013 [264-288]		2	2795.35	234	141.3	8.1	180.5	152.8	2.8	31.4	152.6	41.1	55.3		High	High	Peak Found	High	High	Peak Found	Peak Found	High	High	High	High	7.23e-06	1.696e-06	4.74	52.81	Used	Used	R.EGNDLYREMIESGVIKLGDQQADSK.C	[264-288]
	FALSE	High	[R].EMIESGVIK.[L]		0.0262368	0.0016239	1	1	4	731341013	731341013 [271-279]		0	1005.53	15.5	4	15.8	11.5	23.5	294.3	445.8	9		180.6		Peak Found	Peak Found	Peak Found	High	High	Peak Found	Peak Found	Peak Found	Not Found	High	High	0.0002403	0.002695	1.65	13.07	Used	Used	R.EMIESGVIK.L	[271-279]
	FALSE	High	[R].EMIESGVIKLGDQQADSK.[C]		4.86262e-06	5.33751e-05	1	1	4	731341013	731341013 [271-288]		1	1947.97	238.1	340.6	14.4	54.2	108.2	13.8	77.8	19.9	132.9			Peak Found	High	Peak Found	Peak Found	Peak Found	Peak Found	Peak Found	Peak Found	High	Not Found	High	7.23e-06	6.063e-07	4.11	25.2	Used	Used	R.EMIESGVIKLGDQQADSK.C	[271-288]
	FALSE	High	[K].ESITSFQGVLDGK.[Y]		8.63513e-06	5.33751e-05	1	1	2	731341013	731341013 [510-522]		0	1380.7		145.5	3.3	38.8	23.3	43.7	89.4	246.3	207.4	202.2		Not Found	Peak Found	Peak Found	Peak Found	Peak Found	High	Peak Found	High	Peak Found	Peak Found	High	7.23e-06	1.062e-06	2.55	39	Used	Used	K.ESITSFQGVLDGK.Y	[510-522]
	FALSE	High	[K].ESITSFQGVLDGKYDDLSEQSFYMVGGIEEVIAK.[A]		4.57414e-05	5.33751e-05	1	1	5	731341013	731341013 [510-543]		1	3754.8	239.5			288.7	219		30.2	22.8	154.1	45.7		High	Not Found	Not Found	High	Peak Found	Not Found	High	Peak Found	Peak Found	Peak Found	High	7.23e-06	5.437e-06	3.5	97.56	Used	Used	K.ESITSFQGVLDGKYDDLSEQSFYMVGGIEEVIAK.A	[510-543]
	FALSE	High	[K].ESITSFQGVLDGKYDDLSEQSFYMVGGIEEVIAKAEK.[I]		1.6215e-07	5.33751e-05	1	1	18	731341013	731341013 [510-546]		2	4082.98	457.2	42.2	130	87.8	55.1	32.8	94.5	41.2	34.7	24.7		High	High	Peak Found	High	High	High	High	High	High	High	High	7.23e-06	2.203e-08	7.35	104.1	Used	Used	K.ESITSFQGVLDGKYDDLSEQSFYMVGGIEEVIAKAEK.I	[510-546]
	FALSE	High	[R].FDEGLPPILTALEVLDNETR.[L]		1.83834e-07	5.33751e-05	1	1	91	731341013	731341013 [97-116]		0	2242.16	14.3	125.1	112.9	86	145.4	133.6	124.1	77	98.1	83.5		High	High	High	High	High	High	High	High	High	High	High	7.23e-06	2.491e-08	2.32	103.05	Used	Used	R.FDEGLPPILTALEVLDNETR.L	[97-116]
	FALSE	High	[R].FDEGLPPILTALEVLDNETRLVLEVAQHLGENMVR.[T]		1.6164e-08	5.33751e-05	1	1	13	731341013	731341013 [97-131]		1	3931.06		40.3	383.9	82.9	154.1	17.8	109	47.7	72	92.3		Not Found	Peak Found	Peak Found	High	High	High	High	High	High	High	High	7.23e-06	2.322e-09	6.85	112.84	Used	Used	R.FDEGLPPILTALEVLDNETRLVLEVAQHLGENMVR.T	[97-131]
	FALSE	High	[R].FLSQPFHVAEVFTGAPGK.[Y]		3.03727e-05	5.33751e-05	1	1	5	731341013	731341013 [487-504]		0	1932	68.9		26.7	48.3	242.6	104.5	68.9	223.7	77	139.3		Peak Found	Not Found	Peak Found	Peak Found	High	High	Peak Found	High	High	High	High	7.23e-06	3.628e-06	2.28	47.59	Used	Used	R.FLSQPFHVAEVFTGAPGK.Y	[487-504]
	FALSE	High	[R].FTQANSEVSALLGR.[I]		4.50865e-07	5.33751e-05	1	1	112	731341013	731341013 [335-348]		0	1492.78	119.2	172.1	58.2	98	67.2	104.9	78.8	81.8	115.2	104.5		High	High	High	High	High	High	High	High	High	High	High	7.23e-06	5.953e-08	3.24	38.34	Used	Used	R.FTQANSEVSALLGR.I	[335-348]
	FALSE	High	[R].FTQANSEVSALLGRIPSAVGYQPTLATDLGGLQER.[I]		3.3275e-09	5.33751e-05	1	1	19	731341013	731341013 [335-369]		1	3659.9	248.1	377.2		86.5	37.8		13.4	152.5	64.5	20		High	High	Not Found	High	High	Not Found	Peak Found	High	High	High	High	7.23e-06	4.989e-10	5.41	79.35	Used	Used	R.FTQANSEVSALLGRIPSAVGYQPTLATDLGGLQER.I	[335-369]
	FALSE	High	[R].GELKTDHYLPIHR.[E]		3.17326e-06	5.33751e-05	1	1	26	731341013	731341013 [178-190]		1	1578.84	9.9	69.4	81.1	239.2	92	176.6	116.5	42.9	77.5	94.8		Peak Found	Peak Found	High	High	High	High	High	High	High	High	High	7.23e-06	3.99e-07	4.26	11.64	Used	Used	R.GELKTDHYLPIHR.E	[178-190]
	FALSE	High	[R].GGKIGLFGGAGVGK.[T]		1.83021e-05	5.33751e-05	1	1	14	731341013	731341013 [221-234]		1	1217.7	432.5	190.7	7.3	35.4	60.9	10	25.3	94.5	90.3	53.2		High	High	Peak Found	High	High	Peak Found	High	High	High	High	High	7.23e-06	2.208e-06	3.36	17.97	Used	Used	R.GGKIGLFGGAGVGK.T	[221-234]
	FALSE	High	[R].GGKIGLFGGAGVGKTVLIMELINNVAK.[A]		9.64825e-06	5.33751e-05	1	1	3	731341013	731341013 [221-247]		2	2656.52	815.5							46.1	138.4			High	Not Found	Not Found	Not Found	Not Found	Not Found	Not Found	Peak Found	High	Not Found	High	7.23e-06	1.182e-06	3.72	89.33	Used	Used	R.GGKIGLFGGAGVGKTVLIMELINNVAK.A	[221-247]
	FALSE	High	[K].GSITSVQAIYVPADDLTDPAPATTFAHLDATTVLSR.[Q]		8.88682e-10	5.33751e-05	1	1	7	731341013	731341013 [376-411]		0	3714.89	511.1	221.3		56.9				149.9	52.9	7.9		High	High	Not Found	Peak Found	Not Found	Not Found	Not Found	Peak Found	High	Peak Found	High	7.23e-06	1.374e-10	4.44	71.95	Used	Used	K.GSITSVQAIYVPADDLTDPAPATTFAHLDATTVLSR.Q	[376-411]
	FALSE	High	[K].KGSITSVQAIYVPADDLTDPAPATTFAHLDATTVLSR.[Q]		5.51227e-14	5.33751e-05	1	1	49	731341013	731341013 [375-411]		1	3842.98	210.4	198.3	83.6	113.9	18.3	54.3	65.8	100.2	83.6	71.5		High	High	High	High	High	High	High	High	High	High	High	7.23e-06	1.091e-14	5.94	61.98	Used	Used	K.KGSITSVQAIYVPADDLTDPAPATTFAHLDATTVLSR.Q	[375-411]
	FALSE	High	[K].LGDQQADSKCALVYGQMNEPPGAR.[A]	1xCarbamidomethyl [C10]	1.23031e-06	5.33751e-05	1	1	6	731341013	731341013 [280-303]		1	2605.21	216.2	382.9		130.9	77.6		16.8	92.7	55.9	26.9		High	High	Not Found	High	Peak Found	Not Found	Peak Found	High	High	Peak Found	High	7.23e-06	1.584e-07	4.77	22.57	Used	Used	K.LGDQQADSKCALVYGQMNEPPGAR.A	[280-303]
	FALSE	High	[K].IGLFGGAGVGK.[T]		2.76072e-06	5.33751e-05	1	1	101	731341013	731341013 [224-234]		0	975.562	53.3	98.5	66.2	54.7	87.1	121.1	94.4	139.6	106.5	178.5		High	High	High	High	High	High	High	High	High	High	High	7.23e-06	3.486e-07	2.6	29.31	Used	Used	K.IGLFGGAGVGK.T	[224-234]
	FALSE	High	[K].IGLFGGAGVGKTVLIMELINNVAK.[A]		0.00179549	0.00019222	1	1	1	731341013	731341013 [224-247]		1	2414.38								848.9		151.1		Not Found	Not Found	Not Found	Not Found	Not Found	Not Found	Not Found	High	Not Found	Peak Found	High	2.806e-05	0.0001846	2.13	89.78	Used	Used	K.IGLFGGAGVGKTVLIMELINNVAK.A	[224-247]
	FALSE	High	[K].IGLFGGAGVGKTVLIMELINNVAKAHGGFSVFAGVGER.[T]		1.44575e-08	5.33751e-05	1	1	5	731341013	731341013 [224-261]		2	3786.05		66	221.8	61.9	392.7	31.6		103.9	122.2			Not Found	High	High	Peak Found	High	Peak Found	Not Found	High	High	Not Found	High	7.23e-06	2.089e-09	7.08	108.91	Used	Used	K.IGLFGGAGVGKTVLIMELINNVAKAHGGFSVFAGVGER.T	[224-261]
	FALSE	High	[K].IGLFGGAGVGKTVLIMELINNVAKAHGGFSVFAGVGER.[T]	1xOxidation [M16]; 2xGG [K11; K24]	0.000222635	9.51359e-05	1	1	2	731341013	731341013 [224-261]		2	4030.13											Not Reliable	Not Found	High	Not Found	Not Found	Not Found	Not Found	Not Found	Not Found	Not Found	Not Found	High	1.696e-05	2.552e-05	3.48		Not Used	Not Used	K.IGLFGGAGVGKTVLIMELINNVAKAHGGFSVFAGVGER.T	[224-261]
	FALSE	High	[R].IMNVIGEPIDHR.[G]		0.000135655	9.51359e-05	1	1	39	731341013	731341013 [166-177]		0	1393.73	116.1	58.4	148.7	89.6	157.4	103.1	92.3	50	69.5	114.9		High	High	High	High	High	High	High	High	High	High	High	1.364e-05	1.587e-05	2.53	9.95	Used	Used	R.IMNVIGEPIDHR.G	[166-177]
	FALSE	High	[R].IMNVIGEPIDHRGELK.[T]		2.53937e-06	5.33751e-05	1	1	40	731341013	731341013 [166-181]		1	1820.97	119.7	57	263.8	92.8	186.4	72.5	64.5	32.9	43.8	66.8		High	High	High	High	High	High	High	High	High	High	High	7.23e-06	3.219e-07	3.78	12.59	Used	Used	R.IMNVIGEPIDHRGELK.T	[166-181]
	FALSE	High	[R].IMNVIGEPIDHRGELK.[T]	1xOxidation [M2]	0.000545913	0.000126394	1	1	1	731341013	731341013 [166-181]		1	1836.96	2						38.6	18.5	33.1	907.9		Peak Found	Not Found	Not Found	Not Found	Not Found	Not Found	Peak Found	Peak Found	Peak Found	High	High	1.859e-05	5.969e-05	3.63	11.92	Used	Used	R.IMNVIGEPIDHRGELK.T	[166-181]
	FALSE	High	[R].IMNVIGEPIDHRGELKTDHYLPIHR.[E]		7.87535e-07	5.33751e-05	1	1	85	731341013	731341013 [166-190]		2	2953.55	224.8	97.5	24.6	206.6	80.3	143.3	28.2	37.5	81.6	75.6		High	High	High	High	High	High	High	High	High	High	High	7.23e-06	1.025e-07	4.23	109.48	Used	Used	R.IMNVIGEPIDHRGELKTDHYLPIHR.E	[166-190]
	FALSE	High	[R].IMNVIGEPIDHRGELKTDHYLPIHR.[E]	1xOxidation [M2]	0.000112639	5.33751e-05	1	1	8	731341013	731341013 [166-190]		2	2969.54	37	44.2		49.9		118.9	50.4	40	79.7	579.9		Peak Found	Peak Found	Not Found	High	Not Found	High	Peak Found	Peak Found	High	High	High	7.23e-06	1.325e-05	3.42	25.86	Used	Used	R.IMNVIGEPIDHRGELKTDHYLPIHR.E	[166-190]
	FALSE	High	[R].IPSAVGYQPTLATDLGGLQER.[I]		2.45974e-09	5.33751e-05	1	1	82	731341013	731341013 [349-369]		0	2186.15	146.4	220.3	6.3	59.8	89.6	82.4	78.4	76	118.5	122.3		High	High	High	High	High	High	High	High	High	High	High	7.23e-06	3.708e-10	4.44	49.87	Used	Used	R.IPSAVGYQPTLATDLGGLQER.I	[349-369]
	FALSE	High	[K].ITDEFTGK.[G]		0.000203316	9.51359e-05	1	1	5	731341013	731341013 [72-79]		0	910.452		22.9	25.9	13.1	162.5	9.3	189.3	136.6	220.1	220.3		Not Found	Peak Found	High	Peak Found	Peak Found	High	Peak Found	High	High	High	High	1.696e-05	2.34e-05	1.53	9.52	Used	Used	K.ITDEFTGK.G	[72-79]
	FALSE	High	[K].ITDEFTGKGSVGK.[V]		1.79247e-06	5.33751e-05	1	1	27	731341013	731341013 [72-84]		1	1338.69	135	214.7	59.2	65	54.8	91.2	87.2	111.9	114.2	66.7		High	High	High	High	High	High	High	High	High	High	High	7.23e-06	2.288e-07	3.73	10.75	Used	Used	K.ITDEFTGKGSVGK.V	[72-84]
	FALSE	High	[R].ITTTKKGSITSVQAIYVPADDLTDPAPATTFAHLDATTVLSR.[Q]		2.07763e-08	5.33751e-05	1	1	5	731341013	731341013 [370-411]		2	4387.3			2.2	314.4	19.3			455.9	200.3	7.8		Not Found	Not Found	Peak Found	High	Peak Found	Not Found	Not Found	High	High	Peak Found	High	7.23e-06	2.964e-09	6.73	49.26	Used	Used	R.ITTTKKGSITSVQAIYVPADDLTDPAPATTFAHLDATTVLSR.Q	[370-411]
	FALSE	High	[R].LVLEVAQHLGENMVR.[T]		4.27069e-08	5.33751e-05	1	1	130	731341013	731341013 [117-131]		0	1707.92	116.5	139.5	43.6	127.6	203.9	132.4	56.4	85.2	53.2	41.8		High	High	High	High	High	High	High	High	High	High	High	7.23e-06	6e-09	4.96	43.28	Used	Used	R.LVLEVAQHLGENMVR.T	[117-131]
	FALSE	High	[R].LVLEVAQHLGENMVR.[T]	1xOxidation [M13]	3.02932e-06	5.33751e-05	1	1	23	731341013	731341013 [117-131]		0	1723.92	110.5	119.7	13.7	239.1	223.8	47.4	29.5	43.6	67.3	105.4		Peak Found	High	High	High	High	High	Peak Found	High	High	High	High	7.23e-06	3.819e-07	2.24	47.3	Used	Used	R.LVLEVAQHLGENMVR.T	[117-131]
	FALSE	High	[R].MLSPHILGEEHYNTAR.[G]		7.29985e-09	5.33751e-05	1	1	174	731341013	731341013 [431-446]		0	1867.91	174.9	30.5	37.9	198.9	257	55.3	64.7	54.6	68.3	57.9		High	High	High	High	High	High	High	High	High	High	High	7.23e-06	1.07e-09	5.14	13.54	Used	Used	R.MLSPHILGEEHYNTAR.G	[431-446]
	FALSE	High	[R].MLSPHILGEEHYNTAR.[G]	1xOxidation [M1]	1.01545e-08	5.33751e-05	1	1	12	731341013	731341013 [431-446]		0	1883.91			110.9	42.2	224.4	23.6	40.6	17.2	19.5	521.6		Not Found	Not Found	High	Peak Found	Peak Found	High	High	High	Peak Found	High	High	7.23e-06	1.479e-09	5.57	9.33	Used	Used	R.MLSPHILGEEHYNTAR.G	[431-446]
	FALSE	High	[K].NLQDIIAILGMDELSEDDKLTVAR.[A]		2.12598e-11	5.33751e-05	1	1	111	731341013	731341013 [457-480]		1	2672.38	135.9	80.9	117.9	64.6	70.1	69.7	220.6	113.7	63.5	62.8		High	High	High	High	High	High	High	High	High	High	High	7.23e-06	3.621e-12	5.43	100.54	Used	Used	K.NLQDIIAILGMDELSEDDKLTVAR.A	[457-480]
	FALSE	High	[K].NLQDIIAILGMDELSEDDKLTVAR.[A]	1xOxidation [M11]	2.90355e-08	5.33751e-05	1	1	4	731341013	731341013 [457-480]		1	2688.38		51.9		197.7	22.2	57.5	164.1	13.2	51.2	442.2		Not Found	Peak Found	Not Found	High	Peak Found	Peak Found	Peak Found	Peak Found	Peak Found	High	High	7.23e-06	4.107e-09	6.62	89.09	Used	Used	K.NLQDIIAILGMDELSEDDKLTVAR.A	[457-480]
	FALSE	High	[R].QISELGIYPAVDPLDSTSR.[M]		4.55788e-08	5.33751e-05	1	1	86	731341013	731341013 [412-430]		0	2061.05	173.4	191.6	6.4	90.4	72.6	62.1	46.9	145.5	123.7	87.3		High	High	High	High	High	High	High	High	High	High	High	7.23e-06	6.389e-09	4.28	55.06	Used	Used	R.QISELGIYPAVDPLDSTSR.M	[412-430]
	FALSE	High	[K].SGSEGAGKITDEFTGK.[G]		1.68546e-08	5.33751e-05	1	1	39	731341013	731341013 [64-79]		1	1583.75	91.3	114.4	73	55.9	106	80	109.9	84.3	103.9	181.2		High	High	High	High	High	High	High	High	High	High	High	7.23e-06	2.423e-09	2.97	14.93	Used	Used	K.SGSEGAGKITDEFTGK.G	[64-79]
	FALSE	High	[K].SGSEGAGKITDEFTGKGSVGK.[V]		1.34607e-10	5.33751e-05	1	1	45	731341013	731341013 [64-84]		2	2011.99	89	211.8	79.2	154.3	217.4	25.3	39.9	82	45.9	55.2		High	High	High	High	High	High	High	High	High	High	High	7.23e-06	2.184e-11	6.35	11.11	Used	Used	K.SGSEGAGKITDEFTGKGSVGK.V	[64-84]
	FALSE	High	[K].TDHYLPIHR.[E]		0.000862611	0.000154279	1	1	55	731341013	731341013 [182-190]		0	1151.6	9.2	85	280.5	10.1	124	153.6	156	46.5	61.2	74.1		High	High	High	High	High	High	High	High	High	High	High	2.424e-05	9.188e-05	2.41	10.26	Used	Used	K.TDHYLPIHR.E	[182-190]
	FALSE	High	[R].TIAMDGTEGLVR.[G]		2.74851e-05	5.33751e-05	1	1	63	731341013	731341013 [132-143]		0	1262.64	156.5	149.1	85.2	46.4	60	70.7	120.4	82.7	120	109		High	High	High	High	High	High	High	High	High	High	High	7.23e-06	3.293e-06	2.33	24.08	Used	Used	R.TIAMDGTEGLVR.G	[132-143]
	FALSE	High	[R].TIAMDGTEGLVR.[G]	1xOxidation [M4]	0.000100009	5.33751e-05	1	1	17	731341013	731341013 [132-143]		0	1278.64	9.1	58.2	72.7	22.9	19.6	78	104.2	35.8	74.8	524.6		High	High	High	High	Peak Found	High	High	Peak Found	Peak Found	High	High	7.23e-06	1.176e-05	1.73	13.51	Used	Used	R.TIAMDGTEGLVR.G	[132-143]
	FALSE	High	[R].TIAMDGTEGLVRGQR.[V]		4.71902e-05	5.33751e-05	1	1	24	731341013	731341013 [132-146]		1	1603.82	308.7	7.9	0.3	107.8	144.4	3.3	83.6	134.9	108.7	100.5		High	Peak Found	Peak Found	High	High	Peak Found	High	High	High	High	High	7.23e-06	5.597e-06	2.49	16.71	Used	Used	R.TIAMDGTEGLVRGQR.V	[132-146]
	FALSE	High	[R].TREGNDLYREMIESGVIK.[L]		6.18777e-06	5.33751e-05	1	1	80	731341013	731341013 [262-279]		2	2110.06	78.4	121.3	69.4	135.6	44.5	178.2	88	117.2	89.1	78.2		High	High	High	High	High	High	High	High	High	High	High	7.23e-06	7.651e-07	4.54	37.93	Used	Used	R.TREGNDLYREMIESGVIK.L	[262-279]
	FALSE	High	[R].TREGNDLYREMIESGVIK.[L]	1xOxidation [M11]	0.000322305	0.000126394	1	1	2	731341013	731341013 [262-279]		2	2126.05		76.1			28	98.7		29		768.2		Not Found	Peak Found	Not Found	Not Found	Peak Found	High	Not Found	Peak Found	Not Found	High	High	1.859e-05	3.619e-05	3.48	18.63	Used	Used	R.TREGNDLYREMIESGVIK.L	[262-279]
	FALSE	High	[K].TVLIMELINNVAK.[A]		6.33276e-06	5.33751e-05	1	1	121	731341013	731341013 [235-247]		0	1457.84	86.3	145.1	123	113.2	22.5	176.8	108.7	91.3	84.7	48.5		High	High	High	High	High	High	High	High	High	High	High	7.23e-06	7.838e-07	3.22	109.89	Used	Used	K.TVLIMELINNVAK.A	[235-247]
	FALSE	High	[K].TVLIMELINNVAK.[A]	1xOxidation [M5]	1.08792e-05	5.33751e-05	1	1	41	731341013	731341013 [235-247]		0	1473.83	4.9	35.3	42.3	157.9	328.3	66.9	22.4	39.8	49.6	252.6		High	Peak Found	Peak Found	High	High	High	Peak Found	High	High	High	High	7.23e-06	1.327e-06	3.11	81.69	Used	Used	K.TVLIMELINNVAK.A	[235-247]
	FALSE	High	[K].VCQVIGAVVDVR.[F]	1xCarbamidomethyl [C2]	7.11003e-06	5.33751e-05	1	1	68	731341013	731341013 [85-96]		0	1314.72	20.2	114	91.5	80.9	57	120.2	100	219.6	75.4	121.1		High	High	High	High	High	High	High	High	High	High	High	7.23e-06	8.773e-07	2.19	29	Used	Used	K.VCQVIGAVVDVR.F	[85-96]
	FALSE	High	[R].VGLTGLTVAEHFR.[D]		3.9954e-07	5.33751e-05	1	1	60	731341013	731341013 [306-318]		0	1399.77	49.8	78.9	45.3	70.7	132.4	163.1	134.3	110.1	72.6	142.7		High	High	High	High	High	High	High	High	High	High	High	7.23e-06	5.295e-08	2.75	32.82	Used	Used	R.VGLTGLTVAEHFR.D	[306-318]
	FALSE	High	[R].VGLTGLTVAEHFRDAEGQDVLLFIDNIFR.[F]		5.11839e-11	5.33751e-05	1	1	90	731341013	731341013 [306-334]		1	3245.7	6.8	28.8	242.7	202.1	183.7	12.7	39.9	135.1	121	27.3		High	High	High	High	High	High	High	High	High	High	High	7.23e-06	8.525e-12	5.4	113.78	Used	Used	R.VGLTGLTVAEHFRDAEGQDVLLFIDNIFR.F	[306-334]
	FALSE	High	[R].VLNTGSPITIPVGR.[V]		5.84909e-07	5.33751e-05	1	1	89	731341013	731341013 [147-160]		0	1423.83	190.4	163.9	17.8	38.8	56.6	73.6	114.7	92.6	134.3	117.3		High	High	High	High	High	High	High	High	High	High	High	7.23e-06	7.677e-08	3.78	32.4	Used	Used	R.VLNTGSPITIPVGR.V	[147-160]
	FALSE	High	[R].VLNTGSPITIPVGRVTLGR.[I]		7.379e-05	5.33751e-05	1	1	6	731341013	731341013 [147-165]		1	1950.15	219.5			66.6	88.5		52.8	295.4	121.2	156		High	Not Found	Not Found	High	Peak Found	Not Found	High	High	Peak Found	Peak Found	High	7.23e-06	8.71e-06	2.98	39.77	Used	Used	R.VLNTGSPITIPVGRVTLGR.I	[147-165]
	FALSE	High	[K].VLQNYKNLQDIIAILGMDELSEDDKLTVAR.[A]		5.14099e-14	5.33751e-05	1	1	51	731341013	731341013 [451-480]		2	3417.79	338.2	89.4	43.8	79	67.2	18.9	146.4	40.1	144.1	32.6		High	High	High	High	High	Peak Found	High	High	High	High	High	7.23e-06	1.018e-14	9.3	110.83	Used	Used	K.VLQNYKNLQDIIAILGMDELSEDDKLTVAR.A	[451-480]
	FALSE	High	[K].VLQNYKNLQDIIAILGMDELSEDDKLTVAR.[A]	1xOxidation [M17]	2.82451e-05	5.33751e-05	1	1	2	731341013	731341013 [451-480]		2	3433.79		258.7			38		126.4	64.6	53.4	458.9		Not Found	High	Not Found	Not Found	Peak Found	Not Found	Peak Found	Peak Found	Peak Found	High	High	7.23e-06	3.381e-06	4.18	84.39	Used	Used	K.VLQNYKNLQDIIAILGMDELSEDDKLTVAR.A	[451-480]
	FALSE	High	[K].VVDLLAPYQR.[G]		8.63979e-05	5.33751e-05	1	1	71	731341013	731341013 [211-220]		0	1173.66	109.7	166.8	45.8	69.4	92.8	116.3	107.2	74.1	120.5	97.4		High	High	High	High	High	High	High	High	High	High	High	7.23e-06	1.017e-05	2.59	35.37	Used	Used	K.VVDLLAPYQR.G	[211-220]
FALSE		High	Master Protein	7634629388489850378	4358	731345370	PREDICTED: enolase [Beta vulgaris subsp. vulgaris]	MVAIKGIKARQIYDSRGNPTVEADVHLDDGTYARAAVPSGASTGVYEALELRDGGKDYMGKGVSKAVQNVNEIIGPALVGKDPTEQTAIDNFMVQQLDGTVNEWGWCKQKLGANAILAVSLAVCKAGAQVKKIPLYQHIAEIAGNPKMVLPVPAFNVINGGSHAGNKLAMQEFMILPTGASSFKEAMKMGSEVYHNLKSVIKKKYGQDATNVGDEGGFAPNIQENKEGLELLKTAIEKAGYTGKVVIGMDVAASEFYKEDKSYDLNFKEENNDGSQRISGDALKDLYKSFASEYPIVSIEDPFDQDDWEHYAKMTAECGDKVQVVGDDLLVTNPKRVEKAINEKSCNALLLKVNQIGSVTESIEAVKMSKRAGWGVMASHRSGETEDTFIADLSVGLST…	>gi|731345370|ref|XP_010683886.1| PREDICTED: enolase [Beta vulgaris subsp. vulgaris]	0	799.24	97	59	3362	57	57	444	48	5.49	8009.19	97	3362	59	2	153.9	133.2	82.6	111.8	124.9	68.2	79.4	80.8	87.4	77.9	4.64216e+09	8.1651e+09	3.12921e+09	3.48493e+09	1.49212e+09	3.44361e+09	2.05249e+09	2.9425e+09	3.90404e+09	3.352e+09	9.4341e+09	8.1651e+09	5.06074e+09	6.85248e+09	7.65497e+09
	Checked	Confidence	Annotated Sequence	Modifications	Qvality PEP	Qvality q-value	# Protein Groups	# Proteins	# PSMs	Master Protein Accessions	Positions in Master Proteins	Modifications in Master Proteins	# Missed Cleavages	Theo. MH+ [Da]	Abundances (Scaled): F1: Control	Abundances (Scaled): F2: Control	Abundances (Scaled): F3: Control	Abundances (Scaled): F4: Control	Abundances (Scaled): F5: Control	Abundances (Scaled): F6: Sample	Abundances (Scaled): F7: Sample	Abundances (Scaled): F8: Sample	Abundances (Scaled): F9: Sample	Abundances (Scaled): F10: Sample	Quan Info	Found in Sample: [S1] F1: Control	Found in Sample: [S2] F2: Control	Found in Sample: [S3] F3: Control	Found in Sample: [S4] F4: Control	Found in Sample: [S5] F5: Control	Found in Sample: [S6] F6: Sample	Found in Sample: [S7] F7: Sample	Found in Sample: [S8] F8: Sample	Found in Sample: [S9] F9: Sample	Found in Sample: [S10] F10: Sample	Confidence (by Search Engine): Sequest HT	Percolator q-Value (by Search Engine): Sequest HT	Percolator PEP (by Search Engine): Sequest HT	XCorr (by Search Engine): Sequest HT	Top Apex RT [min]	Quan Usage	Quan Ratio Usage	Sequence in Protein	Positions in Proteins
	FALSE	High	[R].AAVPSGASTGVYEALELR.[D]		4.41195e-08	5.33751e-05	1	1	229	731345370	731345370 [35-52]		0	1790.93	210.7	187.4	36.9	90	86.5	86.4	37.1	95.3	73.2	96.5		High	High	High	High	High	High	High	High	High	High	High	7.23e-06	6.185e-09	2.86	44.8	Used	Used	R.AAVPSGASTGVYEALELR.D	[35-52]
	FALSE	High	[R].AAVPSGASTGVYEALELRDGGK.[D]		1.60336e-06	5.33751e-05	1	1	4	731345370	731345370 [35-56]		1	2148.09	213.8	74.6	205.1	55.5	264.2		41	73.7	27.5	44.5		High	High	High	Peak Found	High	Not Found	Peak Found	Peak Found	Peak Found	Peak Found	High	7.23e-06	2.055e-07	2.63	33.79	Used	Used	R.AAVPSGASTGVYEALELRDGGK.D	[35-56]
	FALSE	High	[R].AAVPSGASTGVYEALELRDGGKDYMGK.[G]		4.57804e-11	5.33751e-05	1	1	92	731345370	731345370 [35-61]		2	2742.34	261.5	176.5	12.3	211.3	112.4	15	58	47.4	68.5	37.1		High	High	High	High	High	High	High	High	High	High	High	7.23e-06	7.631e-12	5.91	35.24	Used	Used	R.AAVPSGASTGVYEALELRDGGKDYMGK.G	[35-61]
	FALSE	High	[R].AAVPSGASTGVYEALELRDGGKDYMGK.[G]	1xOxidation [M25]	1.63926e-05	5.33751e-05	1	1	3	731345370	731345370 [35-61]		2	2758.34				212.7	379.1	26			90	292.2		Not Found	Not Found	Not Found	High	High	Peak Found	Not Found	Not Found	Peak Found	High	High	7.23e-06	1.984e-06	2.84	23.96	Used	Used	R.AAVPSGASTGVYEALELRDGGKDYMGK.G	[35-61]
	FALSE	High	[R].AGWGVMASHR.[S]		5.96264e-06	5.33751e-05	1	1	297	731345370	731345370 [372-381]		0	1071.52	153.4	55.9	71.5	157.2	222.3	40.3	84.1	70.2	77.9	67.3		High	High	High	High	High	High	High	High	High	High	High	7.23e-06	7.405e-07	2.93	11.97	Used	Used	R.AGWGVMASHR.S	[372-381]
	FALSE	High	[R].AGWGVMASHR.[S]	1xOxidation [M6]	3.59035e-05	5.33751e-05	1	1	13	731345370	731345370 [372-381]		0	1087.51	56.5	39.5	242.6	69.3	82	32.3	116.5	179.2	139	43		High	High	Peak Found	High	Peak Found	Peak Found	High	High	High	Peak Found	High	7.23e-06	4.28e-06	2.96	8.82	Used	Used	R.AGWGVMASHR.S	[372-381]
	FALSE	High	[K].AGYTGKVVIGMDVAASEFYKEDK.[S]		4.93073e-06	5.33751e-05	1	1	2	731345370	731345370 [239-261]		2	2478.22	680.6	213.4	7		6.2	92.7						High	High	Peak Found	Not Found	Peak Found	Peak Found	Not Found	Not Found	Not Found	Not Found	High	7.23e-06	6.146e-07	4.45	47.54	Used	Used	K.AGYTGKVVIGMDVAASEFYKEDK.S	[239-261]
	FALSE	High	[K].AINEKSCNALLLK.[V]	1xCarbamidomethyl [C7]	0.000121665	9.51359e-05	1	1	10	731345370	731345370 [340-352]		1	1473.81	109.3	122.5	2.1	251.8	100.9	32.5	57.6	151.2	83.6	88.5		High	High	Peak Found	Peak Found	High	Peak Found	Peak Found	High	High	High	High	1.364e-05	1.428e-05	1.92	14.47	Used	Used	K.AINEKSCNALLLK.V	[340-352]
	FALSE	High	[K].AINEKSCNALLLKVNQIGSVTESIEAVK.[M]	1xCarbamidomethyl [C7]	7.17632e-07	5.33751e-05	1	1	1	731345370	731345370 [340-367]		2	3028.63				1000								Not Found	Not Found	Not Found	High	Not Found	Not Found	Not Found	Not Found	Not Found	Not Found	High	7.23e-06	9.384e-08	4.74	54.13	Used	Used	K.AINEKSCNALLLKVNQIGSVTESIEAVK.M	[340-367]
	FALSE	High	[K].ARQIYDSRGNPTVEADVHLDDGTYAR.[A]		6.35948e-07	5.33751e-05	1	1	7	731345370	731345370 [9-34]		2	2919.4	545.4	4.2		317.1	45.4		2.4	39.7	17	28.8		High	Peak Found	Not Found	High	High	Not Found	Peak Found	Peak Found	High	Peak Found	High	7.23e-06	8.351e-08	4.84	18.97	Used	Used	K.ARQIYDSRGNPTVEADVHLDDGTYAR.A	[9-34]
	FALSE	High	[K].AVQNVNEIIGPALVGKDPTEQTAIDNFMVQQLDGTVNEWGWCK.[Q]	1xCarbamidomethyl [C42]	1.0582e-05	5.33751e-05	1	1	55	731345370	731345370 [66-108]		1	4785.33	33.4	259.6	125	137.9	98.9	38.2	123.3	71.1	76.2	36.4		High	High	High	High	High	High	High	High	High	High	High	7.23e-06	1.295e-06	4.59	97.95	Used	Used	K.AVQNVNEIIGPALVGKDPTEQTAIDNFMVQQLDGTVNEWGWCK.Q	[66-108]
	FALSE	High	[K].AVQNVNEIIGPALVGKDPTEQTAIDNFMVQQLDGTVNEWGWCK.[Q]	1xCarbamidomethyl [C42]; 1xOxidation [M28]	2.26959e-05	5.33751e-05	1	1	4	731345370	731345370 [66-108]		1	4801.32		121		470.9					341.4	66.7		Not Found	High	Not Found	High	Not Found	Not Found	Not Found	Not Found	High	High	High	7.23e-06	2.727e-06	2.71	98.28	Used	Used	K.AVQNVNEIIGPALVGKDPTEQTAIDNFMVQQLDGTVNEWGWCK.Q	[66-108]
	FALSE	High	[R].DGGKDYMGKGVSK.[A]		0.095246	0.00479732	1	1	2	731345370	731345370 [53-65]		2	1341.65											Not Reliable	High	Not Found	Not Found	Not Found	Not Found	Not Found	Not Found	Not Found	Not Found	Not Found	High	0.0006951	0.01027	1.53		Not Used	Not Used	R.DGGKDYMGKGVSK.A	[53-65]
	FALSE	High	[K].EAMKMGSEVYHNLK.[S]		7.24291e-06	5.33751e-05	1	1	4	731345370	731345370 [185-198]		1	1636.78	824.5	28.6	2	92.3	4.6			5.5	33.8	8.8		High	Peak Found	Peak Found	Peak Found	Peak Found	Not Found	Not Found	Peak Found	Peak Found	Peak Found	High	7.23e-06	8.944e-07	3.75	14.63	Used	Used	K.EAMKMGSEVYHNLK.S	[185-198]
	FALSE	High	[K].EDKSYDLNFKEENNDGSQR.[I]		0.0555038	0.00314749	1	1	2	731345370	731345370 [259-277]		2	2288.01			406.6	196.6	151.8			31.1	68.5	145.3		Not Found	High	Peak Found	High	Peak Found	Not Found	Not Found	Peak Found	Peak Found	Peak Found	High	0.0004545	0.005755	2.11	10.05	Used	Used	K.EDKSYDLNFKEENNDGSQR.I	[259-277]
	FALSE	High	[K].EGLELLK.[T]		0.0197068	0.00124898	1	1	10	731345370	731345370 [227-233]		0	801.472	69.9	84.4	147.9	61.4	91.1	104.8	116.6	45.3	127.9	150.8		Peak Found	High	High	Peak Found	Peak Found	High	High	High	High	Peak Found	High	0.0001893	0.002027	2.05	18.51	Used	Used	K.EGLELLK.T	[227-233]
	FALSE	High	[R].GNPTVEADVHLDDGTYAR.[A]		1.49577e-09	5.33751e-05	1	1	176	731345370	731345370 [17-34]		0	1929.89	405.2	111.5	54.6	76.9	98.3	42.6	38	54.3	44.5	74.1		High	High	High	High	High	High	High	High	High	High	High	7.23e-06	2.282e-10	4.48	20.19	Used	Used	R.GNPTVEADVHLDDGTYAR.A	[17-34]
	FALSE	High	[K].KIPLYQHIAEIAGNPK.[M]		8.24999e-07	5.33751e-05	1	1	285	731345370	731345370 [132-147]		1	1792.01	114.4	79.8	118.1	123.9	173.4	115.6	52.9	52.5	73.3	96.2		High	High	High	High	High	High	High	High	High	High	High	7.23e-06	1.073e-07	2.55	104.65	Used	Used	K.KIPLYQHIAEIAGNPK.M	[132-147]
	FALSE	High	[K].KYGQDATNVGDEGGFAPNIQENK.[E]		4.00196e-06	5.33751e-05	1	1	2	731345370	731345370 [204-226]		1	2452.14						325.7	232.7	50.1	133.9	257.6		Not Found	Not Found	Not Found	Not Found	Not Found	High	Peak Found	Peak Found	Peak Found	High	High	7.23e-06	5.006e-07	3.31	14.08	Used	Used	K.KYGQDATNVGDEGGFAPNIQENK.E	[204-226]
	FALSE	High	[K].KYGQDATNVGDEGGFAPNIQENKEGLELLK.[T]		6.01392e-10	5.33751e-05	1	1	53	731345370	731345370 [204-233]		2	3234.59	88.2	126.9	43.1	184.1	261.3	80.4	53.7	52	61.4	48.8		High	High	High	High	High	High	High	High	High	High	High	7.23e-06	9.385e-11	8.03	37.98	Used	Used	K.KYGQDATNVGDEGGFAPNIQENKEGLELLK.T	[204-233]
	FALSE	High	[R].LAKYNQLLR.[I]		0.000443393	0.000126394	2	2	43	731334788; 731345370	731334788 [454-462]; 731345370 [413-421]		1	1118.67	274.3	31.2	16.1	133.8	273.1	6.6	77.7	78.1	55.4	53.6	Shared	High	High	Peak Found	High	High	Peak Found	High	High	High	High	High	1.859e-05	4.891e-05	1.65	14.49	Used	Used	R.LAKYNQLLR.I	[413-421]
	FALSE	High	[R].LAKYNQLLRIEEELGAAAVYAGANFR.[V]		0.000160631	9.51359e-05	1	1	3	731345370	731345370 [413-438]		2	2880.54	93.6	73.4	17.1	263.4	4.3	81.1	423.6		43.5			High	Peak Found	Peak Found	High	Peak Found	Peak Found	High	Not Found	Peak Found	Not Found	High	1.696e-05	1.868e-05	3.57	104.75	Used	Used	R.LAKYNQLLRIEEELGAAAVYAGANFR.V	[413-438]
	FALSE	High	[K].LAMQEFMILPTGASSFK.[E]		4.1855e-07	5.33751e-05	1	1	70	731345370	731345370 [168-184]		0	1870.94	27.6	155.3	84	130.5	84	59.6	91.1	173.3	115.3	79.3		High	High	High	High	High	High	High	High	High	High	High	7.23e-06	5.535e-08	3.83	69.69	Used	Used	K.LAMQEFMILPTGASSFK.E	[168-184]
	FALSE	High	[K].LAMQEFMILPTGASSFK.[E]	1xOxidation [M]	1.46387e-07	5.33751e-05	1	1	33	731345370	731345370 [168-184]		0	1886.94	29	1.2	3	136.5	214.5	159.4	52.7	118.1	80.6	205		Peak Found	High	Peak Found	High	High	High	High	High	High	High	High	7.23e-06	1.993e-08	3.41	49.25	Used	Used	K.LAMQEFMILPTGASSFK.E	[168-184]
	FALSE	High	[K].LAMQEFMILPTGASSFK.[E]	2xOxidation [M3; M7]	2.14844e-06	5.33751e-05	1	1	6	731345370	731345370 [168-184]		0	1902.93				106.3	160.7	35.6		15.1	21.4	660.9		Not Found	Not Found	Not Found	High	High	High	Not Found	Peak Found	Peak Found	High	High	7.23e-06	2.732e-07	3.35	40.78	Used	Used	K.LAMQEFMILPTGASSFK.E	[168-184]
	FALSE	High	[K].LAMQEFMILPTGASSFKEAMK.[M]		2.45974e-09	5.33751e-05	1	1	55	731345370	731345370 [168-188]		1	2330.16	179.8	168.1	110.7	153.1	56.8	29.5	72.1	106.9	80.5	42.5		High	High	High	High	High	High	High	High	High	High	High	7.23e-06	3.708e-10	4.9	62.93	Used	Used	K.LAMQEFMILPTGASSFKEAMK.M	[168-188]
	FALSE	High	[K].LAMQEFMILPTGASSFKEAMK.[M]	1xOxidation [M20]	9.35751e-05	5.33751e-05	1	1	1	731345370	731345370 [168-188]		1	2346.15		403.7			233.8			185.8		176.7		Not Found	High	Not Found	Not Found	Peak Found	Not Found	Not Found	Peak Found	Not Found	Peak Found	High	7.23e-06	1.102e-05	2.72	54.95	Used	Used	K.LAMQEFMILPTGASSFKEAMK.M	[168-188]
	FALSE	High	[K].LAMQEFMILPTGASSFKEAMK.[M]	2xOxidation [M3; M7]	3.4165e-05	5.33751e-05	1	1	1	731345370	731345370 [168-188]		1	2362.15				1000								Not Found	Not Found	Not Found	High	Not Found	Not Found	Not Found	Not Found	Not Found	Not Found	High	7.23e-06	4.076e-06	3.09	63.4	Used	Used	K.LAMQEFMILPTGASSFKEAMK.M	[168-188]
	FALSE	High	[K].LAMQEFMILPTGASSFKEAMKMGSEVYHNLK.[S]		0.000136751	9.51359e-05	1	1	4	731345370	731345370 [168-198]		2	3488.71	532.9	181.5		92.2	193.4							High	Peak Found	Not Found	Peak Found	Peak Found	Not Found	Not Found	Not Found	Not Found	Not Found	High	1.364e-05	1.604e-05	3.58	87.59	Used	Used	K.LAMQEFMILPTGASSFKEAMKMGSEVYHNLK.S	[168-198]
	FALSE	High	[R].IEEELGAAAVYAGANFR.[V]		4.25089e-08	5.33751e-05	1	1	117	731345370	731345370 [422-438]		0	1780.89	100.7	96.9	69.1	64.4	61.2	78.6	88.1	214.9	106.2	119.9		High	High	High	High	High	High	High	High	High	High	High	7.23e-06	5.971e-09	4.06	41.5	Used	Used	R.IEEELGAAAVYAGANFR.V	[422-438]
	FALSE	High	[R].IEEELGAAAVYAGANFRVPVEPY.[-]		2.99008e-09	5.33751e-05	1	1	89	731345370	731345370 [422-444]		1	2465.23	157.3	225.6	49.9	117.5	40.5	29.1	58.2	148.6	126.7	46.6		High	High	High	High	High	High	High	High	High	High	High	7.23e-06	4.496e-10	7.23	69.47	Used	Used	R.IEEELGAAAVYAGANFRVPVEPY.-	[422-444]
	FALSE	High	[K].LGANAILAVSLAVCK.[A]	1xCarbamidomethyl [C14]	4.15327e-06	5.33751e-05	1	1	45	731345370	731345370 [111-125]		0	1499.86	49.5	261.9	146.3	91.3	12.5	99.4	66.7	144.3	68	60.1		High	High	High	High	Peak Found	High	High	High	High	High	High	7.23e-06	5.189e-07	4.06	100.16	Used	Used	K.LGANAILAVSLAVCK.A	[111-125]
	FALSE	High	[K].LGANAILAVSLAVCKAGAQVK.[K]	1xCarbamidomethyl [C14]	2.38856e-08	5.33751e-05	1	1	9	731345370	731345370 [111-131]		1	2054.18	26	161.3	3.7	130.6	11.4	14.2	12.5	443.7	90.1	106.4		Peak Found	High	Peak Found	High	High	Peak Found	Peak Found	High	Peak Found	High	High	7.23e-06	3.408e-09	4.71	58.81	Used	Used	K.LGANAILAVSLAVCKAGAQVK.K	[111-131]
	FALSE	High	[K].IPLYQHIAEIAGNPK.[M]		3.42723e-07	5.33751e-05	1	1	53	731345370	731345370 [133-147]		0	1663.92	90.9	119	299.9	49.8	105.1	91.3	79.7	43.6	69.5	51.2		High	High	High	High	High	High	High	High	High	High	High	7.23e-06	4.552e-08	3.39	23.31	Used	Used	K.IPLYQHIAEIAGNPK.M	[133-147]
	FALSE	High	[R].ISGDALKDLYK.[S]		2.25057e-06	5.33751e-05	1	1	324	731345370	731345370 [278-288]		1	1222.67	140.2	123.3	61	143.1	208.3	51.3	47	70.9	67.6	87.2		High	High	High	High	High	High	High	High	High	High	High	7.23e-06	2.856e-07	3.45	22.67	Used	Used	R.ISGDALKDLYK.S	[278-288]
	FALSE	High	[R].ISGDALKDLYKSFASEYPIVSIEDPFDQDDWEHYAK.[M]		8.43775e-06	5.33751e-05	1	1	6	731345370	731345370 [278-313]		2	4191.97	226.9	13.2		200.4	326.3		172.6	19.2	24	17.3		High	Peak Found	Not Found	High	Peak Found	Not Found	Peak Found	Peak Found	Peak Found	High	High	7.23e-06	1.036e-06	3.61	97.22	Used	Used	R.ISGDALKDLYKSFASEYPIVSIEDPFDQDDWEHYAK.M	[278-313]
	FALSE	High	[K].MGSEVYHNLK.[S]		5.27252e-05	5.33751e-05	1	1	82	731345370	731345370 [189-198]		0	1177.57	91.1	81.8	128.5	116.4	105.6	91.5	115.4	62.1	134.5	73.1		High	High	High	High	High	High	High	High	High	High	High	7.23e-06	6.242e-06	3.02	9.32	Used	Used	K.MGSEVYHNLK.S	[189-198]
	FALSE	High	[K].MGSEVYHNLK.[S]	1xOxidation [M1]	0.00780817	0.000556166	1	1	1	731345370	731345370 [189-198]		0	1193.56	53.7	107.4	118.4		242.3	273.9		81.9	36.8	85.6		Peak Found	Peak Found	Peak Found	Not Found	Peak Found	High	Not Found	Peak Found	Peak Found	Peak Found	High	8.164e-05	0.0007932	1.8	10.04	Used	Used	K.MGSEVYHNLK.S	[189-198]
	FALSE	High	[K].MGSEVYHNLKSVIK.[K]		5.41412e-05	5.33751e-05	1	1	7	731345370	731345370 [189-202]		1	1604.85	714.9	67	31.8	8.1	149.3	3		11.9		13.9		High	High	Peak Found	Peak Found	High	Peak Found	Not Found	Peak Found	Not Found	Peak Found	High	7.23e-06	6.418e-06	3.11	18.36	Used	Used	K.MGSEVYHNLKSVIK.K	[189-202]
	FALSE	High	[K].MGSEVYHNLKSVIKK.[K]		0.0867623	0.00430082	1	1	1	731345370	731345370 [189-203]		2	1732.94	1000											High	Not Found	Not Found	Not Found	Not Found	Not Found	Not Found	Not Found	Not Found	Not Found	High	0.0006283	0.009276	2.38	16.66	Used	Used	K.MGSEVYHNLKSVIKK.K	[189-203]
	FALSE	High	[K].MTAECGDKVQVVGDDLLVTNPK.[R]	1xCarbamidomethyl [C5]	1.27709e-09	5.33751e-05	1	1	75	731345370	731345370 [314-335]		1	2389.17	55.9	242.8	88.6	120.7	94.6	62.8	98	109.3	73.3	53.9		High	High	High	High	High	High	High	High	High	High	High	7.23e-06	1.957e-10	5.23	30.27	Used	Used	K.MTAECGDKVQVVGDDLLVTNPK.R	[314-335]
	FALSE	High	[K].MTAECGDKVQVVGDDLLVTNPK.[R]	1xCarbamidomethyl [C5]; 1xOxidation [M1]	3.44319e-07	5.33751e-05	1	1	18	731345370	731345370 [314-335]		1	2405.17	11.3	76.6	25.4	49.4	235.6	51	49.6	64.9	62.4	373.6		Peak Found	High	High	High	High	High	Peak Found	High	High	High	High	7.23e-06	4.593e-08	4.85	18.87	Used	Used	K.MTAECGDKVQVVGDDLLVTNPK.R	[314-335]
	FALSE	High	[K].MTAECGDKVQVVGDDLLVTNPK.[R]	1xCarbamidomethyl [C5]; 1xPhospho [D/K]	0.0104319	0.000824164	1	1	2	731345370	731345370 [314-335]	731345370 1xPhospho [D/K]	1	2469.14	1000											High	Not Found	Not Found	Not Found	Not Found	Not Found	Not Found	Not Found	Not Found	Not Found	High	0.0001133	0.001072	2.03	50.64	Used	Used	K.MTAECGDKVQVVGDDLLVTNPK.R	[314-335]
	FALSE	High	[K].MTAECGDKVQVVGDDLLVTNPK.[R]	1xCarbamidomethyl [C5]; 1xGG [K8]	0.0011029	0.000154279	1	1	1	731345370	731345370 [314-335]		1	2503.22						565.4				434.6		Not Found	Not Found	Not Found	Not Found	Not Found	High	Not Found	Not Found	Not Found	Peak Found	High	2.424e-05	0.0001163	1.97	26.74	Used	Used	K.MTAECGDKVQVVGDDLLVTNPK.R	[314-335]
	FALSE	High	[K].MVLPVPAFNVINGGSHAGNK.[L]		7.16537e-09	5.33751e-05	1	1	71	731345370	731345370 [148-167]		0	2022.06	256.7	115.5	54.6	97.8	112	92.9	58.8	51.6	87.3	72.7		High	High	High	High	High	High	High	High	High	High	High	7.23e-06	1.053e-09	4.76	102.09	Used	Used	K.MVLPVPAFNVINGGSHAGNK.L	[148-167]
	FALSE	High	[K].MVLPVPAFNVINGGSHAGNK.[L]	1xOxidation [M1]	1.46109e-06	5.33751e-05	1	1	3	731345370	731345370 [148-167]		0	2038.05					29.1	212.1	71.3		55.3	632.2		Not Found	Not Found	Not Found	Not Found	Peak Found	High	Peak Found	Not Found	Peak Found	High	High	7.23e-06	1.872e-07	3.5	32.22	Used	Used	K.MVLPVPAFNVINGGSHAGNK.L	[148-167]
	FALSE	High	[K].MVLPVPAFNVINGGSHAGNKLAMQEFMILPTGASSFK.[E]		0.000231126	9.51359e-05	1	1	2	731345370	731345370 [148-184]		1	3873.99	728			227.1				44.9				High	Not Found	Not Found	High	Not Found	Not Found	Not Found	Peak Found	Not Found	Not Found	High	1.696e-05	2.637e-05	3.49	85.33	Used	Used	K.MVLPVPAFNVINGGSHAGNKLAMQEFMILPTGASSFK.E	[148-184]
	FALSE	High	[K].MVLPVPAFNVINGGSHAGNKLAMQEFMILPTGASSFKEAMK.[M]		0.000140655	9.51359e-05	1	1	1	731345370	731345370 [148-188]		2	4333.2											No Quan Values	Not Found	High	Not Found	Not Found	Not Found	Not Found	Not Found	Not Found	Not Found	Not Found	High	1.364e-05	1.644e-05	5.96		Not Used	Not Used	K.MVLPVPAFNVINGGSHAGNKLAMQEFMILPTGASSFKEAMK.M	[148-188]
	FALSE	High	[K].QKLGANAILAVSLAVCK.[A]	1xCarbamidomethyl [C16]	1.4149e-05	5.33751e-05	1	1	15	731345370	731345370 [109-125]		1	1756.01		202.5	179.3	92.2	9.4	169.7	131.8	93.6	93.2	28.3		Not Found	High	High	High	Peak Found	High	High	High	High	Peak Found	High	7.23e-06	1.72e-06	3.58	103.9	Used	Used	K.QKLGANAILAVSLAVCK.A	[109-125]
	FALSE	High	[K].QKLGANAILAVSLAVCKAGAQVK.[K]	1xCarbamidomethyl [C16]	0.00615998	0.000491899	1	1	1	731345370	731345370 [109-131]		2	2310.33			100		28.4	161.8	97.1	612.7				Not Found	Not Found	Peak Found	Not Found	Peak Found	Peak Found	Peak Found	High	Not Found	Not Found	High	6.94e-05	0.0006206	2.25	40.74	Used	Used	K.QKLGANAILAVSLAVCKAGAQVK.K	[109-131]
	FALSE	High	[R].QIYDSRGNPTVEADVHLDDGTYAR.[A]		3.60643e-10	5.33751e-05	1	1	43	731345370	731345370 [11-34]		1	2692.26	229	64.8	0.2	237.7	238.9	17.7	54.2	64	62.2	31.2		High	High	Peak Found	High	High	Peak Found	High	High	High	High	High	7.23e-06	5.718e-11	6.24	24.08	Used	Used	R.QIYDSRGNPTVEADVHLDDGTYAR.A	[11-34]
	FALSE	High	[K].RAGWGVMASHR.[S]		3.20285e-06	5.33751e-05	1	1	110	731345370	731345370 [371-381]		1	1227.62	141.1	51.4	59.6	83.2	76	97.1	133.2	129.8	176.9	51.6		High	High	High	High	High	High	High	High	High	High	High	7.23e-06	4.031e-07	3.96	9.86	Used	Used	K.RAGWGVMASHR.S	[371-381]
	FALSE	High	[K].RAGWGVMASHR.[S]	1xOxidation [M7]	0.0010597	0.000154279	1	1	5	731345370	731345370 [371-381]		1	1243.61	168.3	12.8	20.7	20.5	6.9	257.7	322	34.6	124.6	31.9		High	Peak Found	Peak Found	Peak Found	Peak Found	High	High	High	Peak Found	Peak Found	High	2.424e-05	0.0001117	2.37	87.06	Used	Used	K.RAGWGVMASHR.S	[371-381]
	FALSE	High	[K].SCNALLLK.[V]	1xCarbamidomethyl [C2]	0.000537191	0.000126394	1	1	59	731345370	731345370 [345-352]		0	918.508	12.1	66.4	145.3	44	89.6	108.2	163.1	73.6	148.5	149.3		High	High	High	High	High	High	High	High	High	High	High	1.859e-05	5.862e-05	2.54	13.2	Used	Used	K.SCNALLLK.V	[345-352]
	FALSE	High	[K].SCNALLLKVNQIGSVTESIEAVK.[M]	1xCarbamidomethyl [C2]	7.57644e-09	5.33751e-05	1	1	12	731345370	731345370 [345-367]		1	2473.33	184	56.3		142.2	23.3	15.2	54.8	309.4	124.9	90		High	High	Not Found	High	High	Peak Found	Peak Found	High	High	High	High	7.23e-06	1.112e-09	5.59	54.05	Used	Used	K.SCNALLLKVNQIGSVTESIEAVK.M	[345-367]
	FALSE	High	[K].SCNALLLKVNQIGSVTESIEAVKMSK.[R]	1xCarbamidomethyl [C2]	3.07181e-06	5.33751e-05	1	1	6	731345370	731345370 [345-370]		2	2819.5				416.5	110			345.3	49.2	79		Not Found	Not Found	Not Found	High	High	Not Found	High	High	Peak Found	Peak Found	High	7.23e-06	3.876e-07	4.46	55.19	Used	Used	K.SCNALLLKVNQIGSVTESIEAVKMSK.R	[345-370]
	FALSE	High	[K].SCNALLLKVNQIGSVTESIEAVKMSK.[R]	1xCarbamidomethyl [C2]; 1xOxidation [M24]	0.00847848	0.000588819	1	1	1	731345370	731345370 [345-370]		2	2835.5				1000								Not Found	Not Found	Not Found	High	Not Found	Not Found	Not Found	Not Found	Not Found	Not Found	High	8.79e-05	0.0008642	1.4	55.13	Used	Used	K.SCNALLLKVNQIGSVTESIEAVKMSK.R	[345-370]
	FALSE	High	[K].SFASEYPIVSIEDPFDQDDWEHYAK.[M]		4.55012e-10	5.33751e-05	1	1	121	731345370	731345370 [289-313]		0	2988.32	99.3	193	106.2	119.6	100.1	79.2	90.4	69.1	71.6	71.8		High	High	High	High	High	High	High	High	High	High	High	7.23e-06	7.151e-11	5.18	76.72	Used	Used	K.SFASEYPIVSIEDPFDQDDWEHYAK.M	[289-313]
	FALSE	High	[R].SGETEDTFIADLSVGLSTGQIK.[T]		1.19107e-09	5.33751e-05	1	1	93	731345370	731345370 [382-403]		0	2268.12	399.6	167.5	115.5	64.7	10.6	56.2	62	63.8	41.5	18.4		High	High	High	High	High	High	High	High	High	High	High	7.23e-06	1.828e-10	5.05	74.23	Used	Used	R.SGETEDTFIADLSVGLSTGQIK.T	[382-403]
	FALSE	High	[R].SGETEDTFIADLSVGLSTGQIKTGAPCR.[S]	1xCarbamidomethyl [C27]	0.00684858	0.000491899	1	1	1	731345370	731345370 [382-409]		1	2910.41				1000								Not Found	Not Found	Not Found	High	Not Found	Not Found	Not Found	Not Found	Not Found	Not Found	High	7.255e-05	0.0006967	1.21	63.03	Used	Used	R.SGETEDTFIADLSVGLSTGQIKTGAPCR.S	[382-409]
	FALSE	High	[R].SGETEDTFIADLSVGLSTGQIKTGAPCRSER.[L]	1xCarbamidomethyl [C27]	1.3359e-08	5.33751e-05	1	1	3	731345370	731345370 [382-412]		2	3282.59	190.9	93.5		218.4	134.4	46		113.4	111.3	92.1		Peak Found	Peak Found	Not Found	High	Peak Found	Peak Found	Not Found	High	Peak Found	Peak Found	High	7.23e-06	1.927e-09	5.34	52.85	Used	Used	R.SGETEDTFIADLSVGLSTGQIKTGAPCRSER.L	[382-412]
	FALSE	High	[K].SYDLNFKEENNDGSQR.[I]		2.4524e-07	5.33751e-05	1	1	75	731345370	731345370 [262-277]		1	1915.84	81.4	89	193.2	48.6	109.4	83.2	101.5	98.8	74.1	120.8		High	High	High	High	High	High	High	High	High	High	High	7.23e-06	3.294e-08	3.1	10.91	Used	Used	K.SYDLNFKEENNDGSQR.I	[262-277]
	FALSE	High	[K].VNQIGSVTESIEAVK.[M]		7.51772e-07	5.33751e-05	1	1	85	731345370	731345370 [353-367]		0	1573.84	172	219	46.3	51.6	71.5	71.5	68.8	83.5	103.6	112.3		High	High	High	High	High	High	High	High	High	High	High	7.23e-06	9.798e-08	3.57	32.28	Used	Used	K.VNQIGSVTESIEAVK.M	[353-367]
	FALSE	High	[K].VNQIGSVTESIEAVKMSK.[R]		2.14951e-09	5.33751e-05	1	1	32	731345370	731345370 [353-370]		1	1920.01	405.3	112.8	0.4	127	97.9	0.7	45.3	106.3	59.9	44.4		High	High	Peak Found	High	High	Peak Found	Peak Found	High	High	High	High	7.23e-06	3.257e-10	4.81	35.04	Used	Used	K.VNQIGSVTESIEAVKMSK.R	[353-370]
[truncated: 45,647 more rows]
[truncated: 87 more columns]
