# Supplementary material for: Comparative Ubiquitination Proteomics Revealed the Salt Tolerance Mechanism in Sugar Beet Monomeric Additional Line M14
Source: Int J Mol Sci. 2022 Dec 17;23(24):16088. doi: 10.3390/ijms232416088 (PMC9782053; doi:10.3390/ijms232416088)
Supplement: Supplementary file 1 [file ijms-23-16088-s001.zip › Table S2-Ubiquitinated protein in sugar beet treated with 400mMNaCl..xlsx]

## Sheet: Proteins
Checked	Tags	Protein FDR Confidence: Combined	Master	Unique Sequence ID	Protein Group IDs	Accession	Description	Sequence	FASTA Title Lines	Exp. q-value: Combined	Sum PEP Score	Coverage [%]	# Peptides	# PSMs	# Protein Unique Peptides	# Unique Peptides	# AAs	MW [kDa]	calc. pI	Score Sequest HT: Sequest HT	Coverage [%] (by Search Engine): Sequest HT	# PSMs (by Search Engine): Sequest HT	# Peptides (by Search Engine): Sequest HT	# Razor Peptides	Abundances (Scaled): F1: Control	Abundances (Scaled): F2: Control	Abundances (Scaled): F3: Control	Abundances (Scaled): F4: Control	Abundances (Scaled): F5: Control	Abundances (Scaled): F6: Sample	Abundances (Scaled): F7: Sample	Abundances (Scaled): F8: Sample	Abundances (Scaled): F9: Sample	Abundances (Scaled): F10: Sample	Abundance: F1: Control	Abundance: F2: Control	Abundance: F3: Control	Abundance: F4: Control	Abundance: F5: Control	Abundance: F6: Sample	Abundance: F7: Sample	Abundance: F8: Sample	Abundance: F9: Sample	Abundance: F10: Sample	Abundances (Normalized): F1: Control	Abundances (Normalized): F2: Control	Abundances (Normalized): F3: Control	Abundances (Normalized): F4: Control	Abundances (Normalized): F5: Control
FALSE		High	Master Protein	-2809488159963032852	1261	731362937	PREDICTED: elongation factor 2 [Beta vulgaris subsp. vulgaris]	MVKFTADELRAIMDCKHNIRNMSVIAHVDHGKSTLTDSLVAAAGIIAQEVAGDVRMTDTRADEAERGITIKSTGISLYYQMTDEALQSYKGERKGNDYLINLIDSPGHVDFSSEVTAALRITDGALVVVDCIEGVCVQTETVLRQALGERIRPVLTVNKMDRCFLELQVDGEEAYTTFQKVIENANVIMATYEDPLLGDVQVYPEKGTVAFSAGLHGWAFTLSNFAKMYASKFGVDESKMMERLWGENFFDPATKKWTTKNSGNASCKRGFVQFCYEPIKQIIATCMNDQKDKLWPMLTKLGIQMKTEEKDLMGKALMKRVMQTWLPASSALLEMMIHHLPSPATAQRYRVENLYEGPMDDVYATAIRNCDPEGPLMLYVSKMIPASDKGRFFAFGRVF…	>gi|731362937|ref|XP_010693156.1| PREDICTED: elongation factor 2 [Beta vulgaris subsp. vulgaris]	0	1375.35	86	85	3334	4	85	843	93.8	6.25	7957.48	86	3334	85	0	123.1	136.7	94.7	111.8	94.7	107.2	98.3	78.9	83.7	71	2.85789e+09	2.6112e+09	1.29762e+09	1.97284e+09	2.89549e+09	1.102e+09	2.24306e+09	1.97386e+09	2.45133e+09	3.55947e+09	6.16869e+09	6.85235e+09	4.74856e+09	5.60553e+09	4.74756e+09
	Checked	Confidence	Annotated Sequence	Modifications	Qvality PEP	Qvality q-value	# Protein Groups	# Proteins	# PSMs	Master Protein Accessions	Positions in Master Proteins	Modifications in Master Proteins	# Missed Cleavages	Theo. MH+ [Da]	Abundances (Scaled): F1: Control	Abundances (Scaled): F2: Control	Abundances (Scaled): F3: Control	Abundances (Scaled): F4: Control	Abundances (Scaled): F5: Control	Abundances (Scaled): F6: Sample	Abundances (Scaled): F7: Sample	Abundances (Scaled): F8: Sample	Abundances (Scaled): F9: Sample	Abundances (Scaled): F10: Sample	Quan Info	Found in Sample: [S1] F1: Control	Found in Sample: [S2] F2: Control	Found in Sample: [S3] F3: Control	Found in Sample: [S4] F4: Control	Found in Sample: [S5] F5: Control	Found in Sample: [S6] F6: Sample	Found in Sample: [S7] F7: Sample	Found in Sample: [S8] F8: Sample	Found in Sample: [S9] F9: Sample	Found in Sample: [S10] F10: Sample	Confidence (by Search Engine): Sequest HT	Percolator q-Value (by Search Engine): Sequest HT	Percolator PEP (by Search Engine): Sequest HT	XCorr (by Search Engine): Sequest HT	Top Apex RT [min]	Quan Usage	Quan Ratio Usage	Sequence in Protein	Positions in Proteins
	FALSE	High	[R].ADEAERGITIK.[S]		0.10038	0.00284151	1	2	1	731362937	731362937 [61-71]		1	1202.64						435.7	260.3	78.1	225.9			Not Found	Not Found	Not Found	Not Found	Not Found	Peak Found	High	Peak Found	Peak Found	Not Found	High	0.0004074	0.006585	1.86	8.47	Used	Used	R.ADEAERGITIK.S	[61-71]
	FALSE	High	[R].AIMDCKHNIR.[N]	1xCarbamidomethyl [C5]	6.7247e-05	5.15092e-05	1	2	4	731362937	731362937 [11-20]		1	1257.62	4.3		10.4	46.7	1.3	232.6	409.6	120.4	62	112.7		Peak Found	Not Found	Peak Found	Peak Found	Peak Found	High	High	High	Peak Found	High	High	7.602e-06	8.346e-07	2.26	10.34	Used	Used	R.AIMDCKHNIR.N	[11-20]
	FALSE	High	[R].AMKFSVSPVVR.[V]		0.000203237	5.15092e-05	1	2	8	731362937	731362937 [480-490]		1	1220.68						150.6	205.9	279.8	117.5	246.3		Not Found	Not Found	Not Found	Not Found	Not Found	High	High	High	Peak Found	High	High	7.602e-06	3.164e-06	3.56	23.07	Used	Used	R.AMKFSVSPVVR.V	[480-490]
	FALSE	High	[R].ASTSGQAFPQCVFDHWEMMPSDPLEAGSQASTLVSVIR.[K]	1xCarbamidomethyl [C11]	4.16281e-09	5.15092e-05	1	2	61	731362937	731362937 [787-824]		0	4136.92	3.3	0.9	7.2	43.9		227.3	211.8	189.5	178.3	137.8		Peak Found	Peak Found	Peak Found	High	Not Found	High	High	High	High	High	High	7.602e-06	7.445e-12	4.18	88.41	Used	Used	R.ASTSGQAFPQCVFDHWEMMPSDPLEAGSQASTLVSVIR.K	[787-824]
	FALSE	High	[R].ASTSGQAFPQCVFDHWEMMPSDPLEAGSQASTLVSVIR.[K]	1xCarbamidomethyl [C11]; 1xOxidation [M]	3.2495e-05	5.15092e-05	1	2	6	731362937	731362937 [787-824]		0	4152.91						564.5				435.5		Not Found	Not Found	Not Found	Not Found	Not Found	High	Not Found	High	Not Found	High	High	7.602e-06	3.501e-07	2.24	93.54	Used	Used	R.ASTSGQAFPQCVFDHWEMMPSDPLEAGSQASTLVSVIR.K	[787-824]
	FALSE	High	[K].AYLPVVESFGFSSTLR.[A]		5.30489e-09	5.15092e-05	1	2	164	731362937	731362937 [771-786]		0	1772.92	114.2	130.1	50.5	95.8	107.7	118.5	99.6	127.6	63.7	92.4		High	High	High	High	High	High	High	High	High	High	High	7.602e-06	1.002e-11	3.55	109.78	Used	Used	K.AYLPVVESFGFSSTLR.A	[771-786]
	FALSE	High	[R].CFLELQVDGEEAYTTFQK.[V]	1xCarbamidomethyl [C1]	7.34785e-09	5.15092e-05	1	2	7	731362937	731362937 [163-180]		0	2178.01	325.5	142				40.2	93.3	161.9	117.4	119.7		High	High	Not Found	Not Found	Not Found	Peak Found	High	High	High	High	High	7.602e-06	1.474e-11	3.29	97.93	Used	Used	R.CFLELQVDGEEAYTTFQK.V	[163-180]
	FALSE	High	[K].DLQDDFMGGAEIIK.[S]		1.15901e-06	5.15092e-05	1	2	11	731362937	731362937 [544-557]		0	1551.74	21.3	111.2	101.3	288.6	267.9	35.8	38.8	49.6	56.1	29.5		Peak Found	High	High	High	High	High	Peak Found	High	Peak Found	Peak Found	High	7.602e-06	6.416e-09	2.86	92.53	Used	Used	K.DLQDDFMGGAEIIK.S	[544-557]
	FALSE	High	[K].DLQDDFMGGAEIIK.[S]	1xOxidation [M7]	0.00909297	0.000194547	1	2	1	731362937	731362937 [544-557]		0	1567.73	173.1			41.4	395.9	180.6		160.6		48.4		Peak Found	Not Found	Not Found	Peak Found	High	Peak Found	Not Found	Peak Found	Not Found	Peak Found	High	4.426e-05	0.0002797	1.37	76.77	Used	Used	K.DLQDDFMGGAEIIK.S	[544-557]
	FALSE	High	[K].DLQDDFMGGAEIIKSDPVVSFR.[E]		2.48537e-10	5.15092e-05	1	2	11	731362937	731362937 [544-565]		1	2439.19	57.4	148.7	76.4	138.6	212	70.8	48	65	138	45		High	High	High	High	High	Peak Found	High	Peak Found	High	High	High	7.602e-06	2.539e-13	3.53	70.58	Used	Used	K.DLQDDFMGGAEIIKSDPVVSFR.E	[544-565]
	FALSE	High	[K].DLQDDFMGGAEIIKSDPVVSFRETVLDR.[S]		0.00144418	5.15092e-05	1	2	2	731362937	731362937 [544-571]		2	3152.56	34	22.3	120.3	13.8		41.1	268.7	202.6	149.5	147.6		Peak Found	Peak Found	Peak Found	Peak Found	Not Found	Peak Found	High	Peak Found	Peak Found	High	High	7.602e-06	3.275e-05	1.74	77.89	Used	Used	K.DLQDDFMGGAEIIKSDPVVSFRETVLDR.S	[544-571]
	FALSE	High	[K].EGALAEENMR.[G]		6.28148e-05	5.15092e-05	1	2	18	731362937	731362937 [674-683]		0	1119.51	105	12.1	208.3	147.1	17.6	84.2	113.5	115.3	113.2	83.7		High	High	High	High	Peak Found	Peak Found	High	Peak Found	High	High	High	7.602e-06	7.737e-07	3.06	12.68	Used	Used	K.EGALAEENMR.G	[674-683]
	FALSE	High	[K].EGALAEENMR.[G]	1xOxidation [M9]	0.055348	0.0012537	1	2	2	731362937	731362937 [674-683]		0	1135.5	573.1	40.4	225	161.5								High	Peak Found	Peak Found	High	Not Found	Not Found	Not Found	Not Found	Not Found	Not Found	High	0.0001966	0.002597	1.71	9.38	Used	Used	K.EGALAEENMR.G	[674-683]
	FALSE	High	[K].EQMTPLSEFEDKL.[-]		1.31909e-05	5.15092e-05	1	2	25	731362937	731362937 [831-843]		1	1566.74	139.1	130.2	44.1	156.3	368.4	26.7	27.6	32	40.2	35.5		High	High	High	High	High	Peak Found	Peak Found	High	High	High	High	7.602e-06	1.184e-07	1.7	102.1	Used	Used	K.EQMTPLSEFEDKL.-	[831-843]
	FALSE	High	[K].EQMTPLSEFEDKL.[-]	1xOxidation [M3]	0.000523781	5.15092e-05	1	2	5	731362937	731362937 [831-843]		1	1582.73	17.2	188.3	33.4	105.6	308.1	185.4	7.7	80.5	14.5	59.3		High	High	Peak Found	Peak Found	High	High	Peak Found	Peak Found	Peak Found	Peak Found	High	7.602e-06	9.801e-06	2.63	99.18	Used	Used	K.EQMTPLSEFEDKL.-	[831-843]
	FALSE	High	[R].ETVLDR.[LS]		0.03886	0.000930212	1	4	4	731362937	731362937 [566-571]		0	732.389	512.2			93.1	166.8	1.9	129.7	2.5		93.7		High	Not Found	Not Found	Peak Found	High	Peak Found	Peak Found	Peak Found	Not Found	Peak Found	High	0.000156	0.001587	1.5	53.44	Used	Used	R.ETVLDR.S	[566-571]
	FALSE	High	[R].FFAFGR.[V]		0.096346	0.00268019	1	2	140	731362937	731362937 [392-397]		0	744.383	164.4	193.4	104.7	199.7	65.1	103.2	36.4	44.1	50.8	38.2		High	High	High	High	High	High	High	High	High	High	High	0.0003844	0.006137	1.27	94.08	Used	Used	R.FFAFGR.V	[392-397]
	FALSE	High	[K].FGVDESK.[M]		0.0620382	0.00133321	1	2	8	731362937	731362937 [233-239]		0	781.373	489	79.5	18.4	7.3	171.7	3.7	81.5	26.1	71	51.9		High	Peak Found	Peak Found	Peak Found	High	Peak Found	Peak Found	Peak Found	Peak Found	Peak Found	High	0.0002104	0.003067	1.54	10.88	Used	Used	K.FGVDESK.M	[233-239]
	FALSE	High	[K].FGVDESKMMER.[L]		1.71662e-08	5.15092e-05	1	2	9	731362937	731362937 [233-243]		1	1328.6		2.1		14.6	3.3	90.6	192.5	250.1	158.9	287.8		Not Found	Peak Found	Not Found	Peak Found	Peak Found	High	High	High	High	High	High	7.602e-06	4.079e-11	3.67	18.77	Used	Used	K.FGVDESKMMER.L	[233-243]
	FALSE	High	[K].FSVSPVVR.[V]		0.00788461	0.000145442	1	2	56	731362937	731362937 [483-490]		0	890.509	61.7	24.5	58.9	101.4	12.9	129	208	115	140.4	148.3		High	High	High	High	High	High	High	High	High	High	High	3.817e-05	0.0002362	1.78	19.52	Used	Used	K.FSVSPVVR.V	[483-490]
	FALSE	High	[K].FTADELR.[A]		0.00243317	0.000100671	1	2	32	731362937	731362937 [4-10]		0	851.426	75.6	49.2	242.1	206.1	63.9	65.7	64.1	62.6	84.9	85.8		High	High	High	High	High	High	High	High	High	High	High	1.369e-05	6.111e-05	1.11	15.66	Used	Used	K.FTADELR.A	[4-10]
	FALSE	High	[R].GFVQFCYEPIK.[Q]	1xCarbamidomethyl [C6]	8.63467e-05	5.15092e-05	1	2	21	731362937	731362937 [270-280]		0	1387.67	246.8	247	22.4	270.7	73.7	30.2	18.3	9.5	26.4	54.9		High	High	High	High	High	High	Peak Found	Peak Found	High	High	High	7.602e-06	1.126e-06	1.75	95.05	Used	Used	R.GFVQFCYEPIK.Q	[270-280]
	FALSE	High	[R].GGGQIIPTAR.[R]		0.000150111	5.15092e-05	1	2	77	731362937	731362937 [702-711]		0	969.548	76.4	17.3	130.5	54.7	28.5	72.7	268	122.6	139.5	90		High	High	High	High	High	High	High	High	High	High	High	7.602e-06	2.196e-06	2.22	12.6	Used	Used	R.GGGQIIPTAR.R	[702-711]
	FALSE	High	[R].GGGQIIPTARR.[V]		0.000116908	5.15092e-05	1	2	14	731362937	731362937 [702-712]		1	1125.65						99.6	491	168.9	117.5	123		Not Found	Not Found	Not Found	Not Found	Not Found	High	High	High	High	High	High	7.602e-06	1.63e-06	3.23	10.85	Used	Used	R.GGGQIIPTARR.V	[702-712]
	FALSE	High	[R].GHVFEEMQRPGTPLYNIK.[A]		5.22819e-08	5.15092e-05	1	2	92	731362937	731362937 [753-770]		0	2116.06	134.9	173.6	46.4	112.7	36.7	104.8	85.1	118.9	64.3	122.4		High	High	High	High	High	High	High	High	High	High	High	7.602e-06	1.562e-10	3.71	28.47	Used	Used	R.GHVFEEMQRPGTPLYNIK.A	[753-770]
	FALSE	High	[R].GHVFEEMQRPGTPLYNIK.[A]	1xOxidation [M7]	0.00179834	5.15092e-05	1	2	7	731362937	731362937 [753-770]		0	2132.06	181	101.3	97.5	171.5	349.6	6.6	43.4	6.4	29.2	13.4		High	Peak Found	Peak Found	High	High	Peak Found	High	Peak Found	Peak Found	High	High	7.602e-06	4.259e-05	3.4	110.45	Used	Used	R.GHVFEEMQRPGTPLYNIK.A	[753-770]
	FALSE	High	[K].GLKEQMTPLSEFEDKL.[-]		3.85908e-09	5.15092e-05	1	2	27	731362937	731362937 [828-843]		2	1864.94	36.6	114.3	73.6	71.2	102	275.6	75.9	123.1	53	74.7		Peak Found	High	High	High	High	Peak Found	High	High	High	High	High	7.602e-06	6.84e-12	3.07	92.53	Used	Used	K.GLKEQMTPLSEFEDKL.-	[828-843]
	FALSE	High	[K].GLKEQMTPLSEFEDKL.[-]	1xOxidation [M6]	5.1195e-05	5.15092e-05	1	2	3	731362937	731362937 [828-843]		2	1880.93				178.8		813.1			8.2			Not Found	Not Found	Not Found	High	Not Found	High	Not Found	Not Found	Peak Found	Not Found	High	7.602e-06	6.013e-07	2.89	53.74	Used	Used	K.GLKEQMTPLSEFEDKL.-	[828-843]
	FALSE	High	[K].GNDYLINLIDSPGHVDFSSEVTAALR.[I]		2.91056e-12	5.15092e-05	1	2	3	731362937	731362937 [95-120]		0	2803.39	554.3	164.9	228.4	15.9		28.5				8		High	High	High	Peak Found	Not Found	Peak Found	Not Found	Not Found	Not Found	Peak Found	High	7.602e-06	1.601e-15	6.77	103.57	Used	Used	K.GNDYLINLIDSPGHVDFSSEVTAALR.I	[95-120]
	FALSE	High	[K].GVQYLNEIK.[D]		0.226794	0.0094074	1	2	1	731362937	731362937 [653-661]		0	1063.58	187.1	254.4	342.4	54.5		97.7				63.9		High	Peak Found	Peak Found	Peak Found	Not Found	Peak Found	Not Found	Not Found	Not Found	Peak Found	High	0.001455	0.02844	0.87	82.99	Used	Used	K.GVQYLNEIK.D	[653-661]
	FALSE	High	[K].GVQYLNEIKDSVVAGFQWASK.[E]		4.68826e-13	5.15092e-05	1	2	172	731362937	731362937 [653-673]		1	2339.2	230.4	180	64.4	47.7	112.7	179.8	53.8	33.1	53.7	44.3		High	High	High	High	High	High	High	High	High	High	High	7.602e-06	2.098e-16	6.69	113.06	Used	Used	K.GVQYLNEIKDSVVAGFQWASK.E	[653-673]
	FALSE	High	[K].GVQYLNEIKDSVVAGFQWASKEGALAEENMR.[G]		3.25894e-13	5.15092e-05	1	2	20	731362937	731362937 [653-683]		2	3439.7	6.8	252.3	61.6	11.6	16.7	145.8	214.6	88.9	167.4	34.2		Peak Found	Peak Found	Peak Found	Peak Found	Peak Found	High	High	High	High	High	High	7.602e-06	1.397e-16	5.68	107.56	Used	Used	K.GVQYLNEIKDSVVAGFQWASKEGALAEENMR.G	[653-683]
	FALSE	High	[R].KGNDYLINLIDSPGHVDFSSEVTAALR.[I]		5.99876e-19	5.15092e-05	1	2	44	731362937	731362937 [94-120]		1	2931.48	137.1	184.8	33.3	305.6	169	65.7	25.8	32	24.7	22.1		High	High	High	High	High	High	High	High	High	High	High	7.602e-06	5.645e-23	10.55	113.37	Used	Used	R.KGNDYLINLIDSPGHVDFSSEVTAALR.I	[94-120]
	FALSE	High	[K].KIWCFGPETTGPNMVVDMCK.[G]	2xCarbamidomethyl [C4; C19]	6.76031e-09	5.15092e-05	1	2	19	731362937	731362937 [633-652]		1	2370.07	97.4	255.3	25.7	113.1	45.3	29	127.1	79.3	117.2	110.5		High	High	High	High	Peak Found	High	High	Peak Found	High	High	High	7.602e-06	1.333e-11	5.48	47.74	Used	Used	K.KIWCFGPETTGPNMVVDMCK.G	[633-652]
	FALSE	High	[K].KIWCFGPETTGPNMVVDMCK.[G]	2xCarbamidomethyl [C4; C19]; 1xOxidation [M]	8.90033e-05	5.15092e-05	1	2	5	731362937	731362937 [633-652]		1	2386.07	176.9	570.7		135.1		38.9	22.6			55.7		High	High	Not Found	High	Not Found	Peak Found	Peak Found	Not Found	Not Found	High	High	7.602e-06	1.172e-06	4.18	98.73	Used	Used	K.KIWCFGPETTGPNMVVDMCK.G	[633-652]
	FALSE	High	[K].KQETVEDVPCGNTVALVGLDQYITK.[N]	1xCarbamidomethyl [C10]	1.81012e-08	5.15092e-05	1	2	37	731362937	731362937 [439-463]		1	2777.4		33.3	37.4	149	264.2	63.5	139	124.7	104.5	84.4		Not Found	High	High	High	High	High	High	High	High	High	High	7.602e-06	4.347e-11	6.45	48.96	Used	Used	K.KQETVEDVPCGNTVALVGLDQYITK.N	[439-463]
	FALSE	High	[K].LGIQMKTEEKDLMGK.[A]		6.09068e-06	5.15092e-05	1	1	2	731362937	731362937 [301-315]		2	1720.9							340	419.4	240.6			Not Found	Not Found	Not Found	Not Found	Not Found	Not Found	High	High	Peak Found	Not Found	High	7.602e-06	4.686e-08	2.37	21.03	Used	Used	K.LGIQMKTEEKDLMGK.A	[301-315]
	FALSE	High	[R].IGPRDDPKNR.[S]		0.111132	0.00332293	1	2	2	731362937	731362937 [607-616]		2	1167.62						95		889	16			Not Found	Not Found	Not Found	Not Found	Not Found	Peak Found	Not Found	High	Peak Found	Not Found	High	0.0004762	0.007847	1.71	59.74	Used	Used	R.IGPRDDPKNR.S	[607-616]
	FALSE	High	[K].ILAEEYGWDKDLAK.[K]		4.92072e-08	5.15092e-05	1	2	73	731362937	731362937 [619-632]		1	1650.84	129.7	146.6	43.4	128.4	238.8	58	60.6	48.2	76.8	69.5		High	High	High	High	High	High	High	High	High	High	High	7.602e-06	1.442e-10	3.45	30.84	Used	Used	K.ILAEEYGWDKDLAK.K	[619-632]
	FALSE	High	[K].ILAEEYGWDKDLAKK.[I]		1.89653e-06	5.15092e-05	1	2	10	731362937	731362937 [619-633]		2	1778.93	118.2	105.9	15.5	86.3	83.5	137.8	87.7	77.3	111.9	175.7		High	High	Peak Found	High	High	Peak Found	High	High	Peak Found	High	High	7.602e-06	1.161e-08	3.87	25.09	Used	Used	K.ILAEEYGWDKDLAKK.I	[619-633]
	FALSE	High	[R].LLEPVYLVEIQAPENALGGIYSVLNQK.[R]		2.59942e-11	5.15092e-05	1	2	65	731362937	731362937 [725-751]		0	2970.62	153.7	92	39.6	69.2	111.4	125.4	77.2	152.1	86.1	93.2		High	High	High	High	High	High	High	High	High	High	High	7.602e-06	1.846e-14	4.17	101.94	Used	Used	R.LLEPVYLVEIQAPENALGGIYSVLNQK.R	[725-751]
	FALSE	High	[R].LLEPVYLVEIQAPENALGGIYSVLNQKR.[G]		5.96398e-16	5.15092e-05	1	2	41	731362937	731362937 [725-752]		1	3126.72	18	9.4	6.8	0.8	1.5	203.3	230.4	191.9	205.6	132.2		High	High	High	Peak Found	Peak Found	High	High	High	High	High	High	7.602e-06	1.236e-19	4.68	94.98	Used	Used	R.LLEPVYLVEIQAPENALGGIYSVLNQKR.G	[725-752]
	FALSE	High	[R].IMGPNYVPGEK.[K]		8.25098e-05	5.15092e-05	1	2	9	731362937	731362937 [411-421]		0	1204.6	92.8	1.5	312.6	304.1	4.8	30.8	37.1	63.5	69.5	83.3		High	Peak Found	Peak Found	High	Peak Found	Peak Found	Peak Found	High	High	High	High	7.602e-06	1.069e-06	2.45	16.41	Used	Used	R.IMGPNYVPGEK.K	[411-421]
	FALSE	High	[R].IMGPNYVPGEKK.[D]		0.00374175	0.000100671	1	2	5	731362937	731362937 [411-422]		1	1332.7	375.4	9.7	38.2	189.1		50.1	68.4	141.1	118.7	9.3		High	Peak Found	Peak Found	High	Not Found	Peak Found	Peak Found	Peak Found	High	Peak Found	High	1.369e-05	0.0001004	2.36	12.5	Used	Used	R.IMGPNYVPGEKK.D	[411-422]
	FALSE	High	[R].IMGPNYVPGEKKDLYVK.[N]		4.74059e-07	5.15092e-05	1	2	14	731362937	731362937 [411-427]		2	1951.04				10.6		238	157.2	137.2	121.4	335.5		Not Found	Not Found	Not Found	Peak Found	Not Found	High	High	High	High	High	High	7.602e-06	2.187e-09	3.28	19.82	Used	Used	R.IMGPNYVPGEKKDLYVK.N	[411-427]
	FALSE	High	[R].IRPVLTVNK.[M]		0.00812501	0.000145442	1	2	19	731362937	731362937 [151-159]		0	1039.66	133.5	5.4	63.5	109.2	299.2	112.4	69	46.4	104.7	56.6		High	Peak Found	High	High	High	High	Peak Found	High	High	High	High	3.817e-05	0.0002456	3.13	106.84	Used	Used	R.IRPVLTVNK.M	[151-159]
	FALSE	High	[R].IRPVLTVNKMDR.[C]		1.41136e-06	5.15092e-05	1	2	24	731362937	731362937 [151-162]		1	1441.83	0.1	19.1	12	33.4	0.5	149.4	308.6	130.6	214.8	131.6		Peak Found	High	Peak Found	Peak Found	Peak Found	High	High	High	High	High	High	7.602e-06	8.097e-09	4.73	8.78	Used	Used	R.IRPVLTVNKMDR.C	[151-162]
	FALSE	High	[R].ITDGALVVVDCIEGVCVQTETVLR.[Q]	2xCarbamidomethyl [C11; C16]	1.3885e-08	5.15092e-05	1	2	8	731362937	731362937 [121-144]		0	2646.35	165	51.8	115.1	14.2	16.3	83.2	125.9	126.5	150	152		High	Peak Found	Peak Found	Peak Found	Peak Found	Peak Found	High	High	High	High	High	7.602e-06	3.178e-11	3.58	89.69	Used	Used	R.ITDGALVVVDCIEGVCVQTETVLR.Q	[121-144]
	FALSE	High	[R].ITDGALVVVDCIEGVCVQTETVLRQALGER.[I]	2xCarbamidomethyl [C11; C16]	6.61616e-07	5.15092e-05	1	2	2	731362937	731362937 [121-150]		1	3300.69											Not Reliable	Not Found	Not Found	Not Found	Not Found	Not Found	Not Found	High	Not Found	Not Found	Not Found	High	7.602e-06	3.259e-09	4.7		Not Used	Not Used	R.ITDGALVVVDCIEGVCVQTETVLRQALGER.I	[121-150]
	FALSE	High	[K].IWCFGPETTGPNMVVDMCK.[G]	2xCarbamidomethyl [C3; C18]	1.46413e-08	5.15092e-05	1	2	19	731362937	731362937 [634-652]		0	2241.98	120.7	161.4		80	173.3	21.3	90.5	147	97.9	107.8		High	High	Not Found	High	High	Peak Found	High	High	High	High	High	7.602e-06	3.384e-11	2.96	62.31	Used	Used	K.IWCFGPETTGPNMVVDMCK.G	[634-652]
	FALSE	High	[K].IWCFGPETTGPNMVVDMCK.[G]	2xCarbamidomethyl [C3; C18]; 1xOxidation [M13]	0.00583673	0.000145442	1	2	3	731362937	731362937 [634-652]		0	2257.97	20.9	159.1	20.3			51.7	219.3	214.8	245.4	68.6		Peak Found	High	Peak Found	Not Found	Not Found	Peak Found	High	Peak Found	Peak Found	High	High	2.667e-05	0.0001675	1.24	64.41	Used	Used	K.IWCFGPETTGPNMVVDMCK.G	[634-652]
	FALSE	High	[R].LWGENFFDPATK.[K]		9.37476e-07	5.15092e-05	1	2	79	731362937	731362937 [244-255]		0	1424.68	150.1	166.4	114.8	184.3	191.8	51.6	34.3	19.5	44.1	43		High	High	High	High	High	High	High	High	High	High	High	7.602e-06	4.959e-09	1.84	104.4	Used	Used	R.LWGENFFDPATK.K	[244-255]
	FALSE	High	[R].LWGENFFDPATKK.[W]		2.41401e-08	5.15092e-05	1	2	166	731362937	731362937 [244-256]		1	1552.78	159	178.6	149.2	180.5	159.7	41.4	19.4	37.6	32.2	42.4		High	High	High	High	High	High	High	High	High	High	High	7.602e-06	6.139e-11	2.31	44.63	Used	Used	R.LWGENFFDPATKK.W	[244-256]
	FALSE	High	[R].LWGENFFDPATKKWTTK.[N]		4.13867e-06	5.15092e-05	1	2	5	731362937	731362937 [244-260]		2	2069.05		64.4	40.1			358.7	295.5	49.3	147.5	44.6		Not Found	Peak Found	Peak Found	Not Found	Not Found	High	High	Peak Found	High	High	High	7.602e-06	2.956e-08	3.27	41.31	Used	Used	R.LWGENFFDPATKKWTTK.N	[244-260]
	FALSE	High	[K].LWPMLTK.[L]		0.0651971	0.0014991	1	1	7	731362937	731362937 [294-300]		0	888.501	228.4	271.4	16.6	135.7	331.8	6.3	0.3		0.7	8.7		High	High	Peak Found	High	High	Peak Found	Peak Found	Not Found	Peak Found	Peak Found	High	0.0002297	0.003299	0.88	109.34	Used	Used	K.LWPMLTK.L	[294-300]
	FALSE	High	[R].LYMEARPMEEGLAEAIDEGR.[I]		1.1198e-13	5.15092e-05	1	2	111	731362937	731362937 [587-606]		0	2280.06	111.5	118	143.5	161.1	56.3	42.7	88	90.9	97.9	90.3		High	High	High	High	High	High	High	High	High	High	High	7.602e-06	4.238e-17	5.14	49.1	Used	Used	R.LYMEARPMEEGLAEAIDEGR.I	[587-606]
	FALSE	High	[R].LYMEARPMEEGLAEAIDEGR.[I]	1xOxidation [M]	2.46806e-09	5.15092e-05	1	2	44	731362937	731362937 [587-606]		0	2296.06	68.9	85.1	15.7	158.7	229.1	105.9	125.6	71.5	79.8	59.5		High	High	High	High	High	High	High	High	High	High	High	7.602e-06	3.977e-12	2.78	52.11	Used	Used	R.LYMEARPMEEGLAEAIDEGR.I	[587-606]
	FALSE	High	[R].LYMEARPMEEGLAEAIDEGR.[I]	2xOxidation [M3; M8]	1.74488e-06	5.15092e-05	1	2	9	731362937	731362937 [587-606]		0	2312.05	83	30.4	8.7	66.1		630.3	43.4	37.4	35.1	65.6		High	Peak Found	Peak Found	High	Not Found	High	High	High	Peak Found	High	High	7.602e-06	1.05e-08	2.43	52.06	Used	Used	R.LYMEARPMEEGLAEAIDEGR.I	[587-606]
	FALSE	High	[R].LYMEARPMEEGLAEAIDEGRIGPR.[D]		2.56485e-08	5.15092e-05	1	2	10	731362937	731362937 [587-610]		1	2703.32		36.8	6.7	8.5		214.2	211.1	143	187.1	192.6		Not Found	Peak Found	Peak Found	Peak Found	Not Found	High	High	High	High	High	High	7.602e-06	6.63e-11	3.53	52.06	Used	Used	R.LYMEARPMEEGLAEAIDEGRIGPR.D	[587-610]
	FALSE	High	[R].LYMEARPMEEGLAEAIDEGRIGPR.[D]	1xOxidation [M3]	0.00155765	5.15092e-05	1	2	5	731362937	731362937 [587-610]		1	2719.32						420.8		393.1		186.1		Not Found	Not Found	Not Found	Not Found	Not Found	High	Not Found	Peak Found	Not Found	High	High	7.602e-06	3.589e-05	1.99	56.52	Used	Used	R.LYMEARPMEEGLAEAIDEGRIGPR.D	[587-610]
	FALSE	High	[K].MDRCFLELQVDGEEAYTTFQK.[V]	1xCarbamidomethyl [C4]	0.000759045	5.15092e-05	1	2	2	731362937	731362937 [160-180]		1	2580.17											Not Reliable	Not Found	Not Found	Not Found	Not Found	Not Found	Not Found	High	Not Found	High	Not Found	High	7.602e-06	1.533e-05	2.71		Not Used	Not Used	K.MDRCFLELQVDGEEAYTTFQK.V	[160-180]
	FALSE	High	[R].MTDTRADEAER.[G]		0.0214359	0.000413429	1	2	1	731362937	731362937 [56-66]		1	1294.57	248			752								High	Not Found	Not Found	Peak Found	Not Found	Not Found	Not Found	Not Found	Not Found	Not Found	High	7.97e-05	0.0007516	1.69	7.99	Used	Used	R.MTDTRADEAER.G	[56-66]
	FALSE	High	[R].MTDTRADEAERGITIK.[S]		3.31843e-08	5.15092e-05	1	2	15	731362937	731362937 [56-71]		2	1806.9						193	232	165.4	171.1	238.6		Not Found	Not Found	Not Found	Not Found	Not Found	High	High	High	High	High	High	7.602e-06	9.042e-11	3.84	12.86	Used	Used	R.MTDTRADEAERGITIK.S	[56-71]
	FALSE	High	[-].MVKFTADELR.[A]	1xMet-loss [N-Term]	0.000225973	5.15092e-05	1	2	65	731362937	731362937 [1-10]	731362937 1xMet-loss [N-Term]	1	1078.59	33.2	62.1	44.7	49.2	72.1	222.7	145.6	110.1	135.2	125.2		High	High	High	High	High	High	High	High	High	High	High	7.602e-06	3.585e-06	1.68	9.85	Used	Used	-.MVKFTADELR.A	[1-10]
	FALSE	High	[-].MVKFTADELRAIMDCK.[H]	1xCarbamidomethyl [C15]; 1xMet-loss [N-Term]	0.0109661	0.000239412	1	2	1	731362937	731362937 [1-16]	731362937 1xMet-loss [N-Term]	2	1796.9							467	246.8	286.1			Not Found	Not Found	Not Found	Not Found	Not Found	Not Found	High	Peak Found	Peak Found	Not Found	High	5.511e-05	0.0003441	1.63	36.87	Used	Used	-.MVKFTADELRAIMDCK.H	[1-16]
	FALSE	High	[K].NATLTNEKESDAHPIR.[A]		9.85637e-12	5.15092e-05	1	2	58	731362937	731362937 [464-479]		1	1795.89	74.7	101	78.5	95.7	171	240	76.4	58	68.6	36.1		High	High	High	High	High	High	High	High	High	High	High	7.602e-06	6.259e-15	4.34	7.79	Used	Used	K.NATLTNEKESDAHPIR.A	[464-479]
	FALSE	High	[K].NATLTNEKESDAHPIRAMK.[F]		5.95034e-07	5.15092e-05	1	2	4	731362937	731362937 [464-482]		2	2126.07		1.6		96.5		171.3	137.9	425.9	76	90.8		Not Found	Peak Found	Not Found	Peak Found	Not Found	High	Peak Found	High	Peak Found	High	High	7.602e-06	2.872e-09	4.64	10.92	Used	Used	K.NATLTNEKESDAHPIRAMK.F	[464-482]
	FALSE	High	[R].NCDPEGPLMLYVSK.[M]	1xCarbamidomethyl [C2]	1.82603e-06	5.15092e-05	1	2	37	731362937	731362937 [369-382]		0	1622.76	107.7	56.7	40.6	165	78.5	66.9	76.7	136.1	96.7	175.2		High	High	High	High	High	High	High	High	High	High	High	7.602e-06	1.108e-08	2.34	44.81	Used	Used	R.NCDPEGPLMLYVSK.M	[369-382]
	FALSE	High	[R].NCDPEGPLMLYVSK.[M]	1xCarbamidomethyl [C2]; 1xOxidation [M9]	0.0755931	0.00157116	1	2	5	731362937	731362937 [369-382]		0	1638.75	83.5		113.1	51.6	333	262		156.9				Peak Found	Not Found	High	Peak Found	High	High	Not Found	Peak Found	Not Found	Not Found	High	0.0002371	0.004139	1.3	43.72	Used	Used	R.NCDPEGPLMLYVSK.M	[369-382]
	FALSE	High	[R].NMSVIAHVDHGK.[S]		2.96369e-07	5.15092e-05	1	2	38	731362937	731362937 [21-32]		0	1307.65	71.4	90.6	36.4	84.2	241.4	250.2	78.3	41.6	79.8	26.1		High	High	High	High	High	High	High	High	High	High	High	7.602e-06	1.246e-09	3.95	7.93	Used	Used	R.NMSVIAHVDHGK.S	[21-32]
	FALSE	High	[R].NMSVIAHVDHGK.[S]	1xOxidation [M2]	1.14225e-05	5.15092e-05	1	2	8	731362937	731362937 [21-32]		0	1323.65	143.9	199.5	69.8	157.6	424.2				2.6	2.4		High	High	High	High	High	Not Found	Not Found	Not Found	Peak Found	Peak Found	High	7.602e-06	1e-07	3.07	106.12	Used	Used	R.NMSVIAHVDHGK.S	[21-32]
	FALSE	High	[R].NMSVIAHVDHGKSTLTDSLVAAAGIIAQEVAGDVR.[M]		1.28568e-10	5.15092e-05	1	2	33	731362937	731362937 [21-55]		1	3545.84	0.3		19.3	17.1	0.6	177.2	277	219	194.4	95.1		Peak Found	Not Found	Peak Found	Peak Found	Peak Found	High	High	High	High	High	High	7.602e-06	1.151e-13	5.41	108.52	Used	Used	R.NMSVIAHVDHGKSTLTDSLVAAAGIIAQEVAGDVR.M	[21-55]
	FALSE	High	[K].QETVEDVPCGNTVALVGLDQYITK.[N]	1xCarbamidomethyl [C9]	0.00100437	5.15092e-05	1	2	1	731362937	731362937 [440-463]		0	2649.31				111.8		51	292.9	268	182.2	94		Not Found	Not Found	Not Found	Peak Found	Not Found	Peak Found	High	Peak Found	Peak Found	Peak Found	High	7.602e-06	2.134e-05	1.25	59.19	Used	Used	K.QETVEDVPCGNTVALVGLDQYITK.N	[440-463]
	FALSE	High	[K].QIIATCMNDQKDKLWPMLTK.[L]	1xCarbamidomethyl [C6]	0.000770625	5.15092e-05	1	1	7	731362937	731362937 [281-300]		2	2434.23	536.8	3.5	36.6	78.7	273.3	37.6	3.4	14.4	10.6	5		High	Peak Found	Peak Found	High	High	Peak Found	Peak Found	Peak Found	Peak Found	High	High	7.602e-06	1.55e-05	2.61	109.54	Used	Used	K.QIIATCMNDQKDKLWPMLTK.L	[281-300]
	FALSE	High	[K].RGFVQFCYEPIK.[Q]	1xCarbamidomethyl [C7]	0.0214359	0.000413429	1	2	2	731362937	731362937 [269-280]		1	1543.77	309.3	280.8	33.3		119		32.8	89.1	135.7			High	High	Peak Found	Not Found	Peak Found	Not Found	Peak Found	Peak Found	Peak Found	Not Found	High	7.97e-05	0.0007525	2.6	106.32	Used	Used	K.RGFVQFCYEPIK.Q	[269-280]
	FALSE	High	[K].RGHVFEEMQRPGTPLYNIK.[A]		7.68506e-10	5.15092e-05	1	2	60	731362937	731362937 [752-770]		1	2272.17	191.9	162.2	44.4	30	14.3	179.1	128.1	85.9	86.6	77.5		High	High	High	High	Peak Found	High	High	High	High	High	High	7.602e-06	9.817e-13	6.68	24.87	Used	Used	K.RGHVFEEMQRPGTPLYNIK.A	[752-770]
	FALSE	High	[K].RGHVFEEMQRPGTPLYNIK.[A]	1xOxidation [M8]	0.0203528	0.000413429	1	2	6	731362937	731362937 [752-770]		1	2288.16			38.3			692.2	56.1		213.4			Not Found	High	Peak Found	Not Found	Not Found	High	High	Not Found	High	Not Found	High	7.97e-05	0.0007075	2.95	90.91	Used	Used	K.RGHVFEEMQRPGTPLYNIK.A	[752-770]
	FALSE	High	[K].RGHVFEEMQRPGTPLYNIKAYLPVVESFGFSSTLR.[A]		0.020965	0.000413429	1	2	2	731362937	731362937 [752-786]		2	4026.07	526.9							473.1				Peak Found	Not Found	Not Found	Not Found	Not Found	Not Found	Not Found	High	Not Found	Not Found	High	7.97e-05	0.0007285	1.99	94.75	Used	Used	K.RGHVFEEMQRPGTPLYNIKAYLPVVESFGFSSTLR.A	[752-786]
	FALSE	High	[R].RVFYASQLTAKPR.[L]		2.48537e-10	5.15092e-05	1	2	316	731362937	731362937 [712-724]		1	1536.86	47.9	63.8	16.3	40.9	56.2	125	277	133.2	147.6	92.2		High	High	High	High	High	High	High	High	High	High	High	7.602e-06	2.547e-13	5.28	12.59	Used	Used	R.RVFYASQLTAKPR.L	[712-724]
	FALSE	High	[K].RVMQTWLPASSALLEMMIHHLPSPATAQR.[Y]		4.22141e-11	5.15092e-05	1	2	11	731362937	731362937 [320-348]		1	3272.69	211.2	106.1	163.2	177.5	58.2	70.6	11.9	98.9	46.1	56.3		Peak Found	High	High	High	Peak Found	High	Peak Found	Peak Found	High	High	High	7.602e-06	3.171e-14	7.28	109.19	Used	Used	K.RVMQTWLPASSALLEMMIHHLPSPATAQR.Y	[320-348]
	FALSE	High	[K].RVMQTWLPASSALLEMMIHHLPSPATAQR.[Y]	1xOxidation [M3]	0.112639	0.00340044	1	2	1	731362937	731362937 [320-348]		1	3288.68		398	214.1	212.2		175.7						Not Found	Peak Found	Peak Found	High	Not Found	Peak Found	Not Found	Not Found	Not Found	Not Found	High	0.0004807	0.008015	2.04	107.83	Used	Used	K.RVMQTWLPASSALLEMMIHHLPSPATAQR.Y	[320-348]
	FALSE	High	[K].SDPMVVCSIEESGEHIIAGAGELHLEICLK.[D]	2xCarbamidomethyl [C7; C28]	1.27673e-09	5.15092e-05	1	2	1	731362937	731362937 [514-543]		0	3293.59	225.1	222.6	47.9	22.1				482.3				High	Peak Found	Peak Found	Peak Found	Not Found	Not Found	Not Found	Peak Found	Not Found	Not Found	High	7.602e-06	1.815e-12	4.64	114.21	Used	Used	K.SDPMVVCSIEESGEHIIAGAGELHLEICLK.D	[514-543]
	FALSE	High	[K].SDPVVSFR.[E]		0.00715097	0.000145442	1	2	31	731362937	731362937 [558-565]		0	906.468	53	34.6	121.5	150.5	30.6	108.8	125.2	149.5	106.4	119.9		High	High	High	High	High	High	Peak Found	High	High	High	High	3.22e-05	0.0002118	1.75	15.56	Used	Used	K.SDPVVSFR.E	[558-565]
	FALSE	High	[K].SDPVVSFRETVLDR.[S]		5.86747e-05	5.15092e-05	1	2	8	731362937	731362937 [558-571]		1	1619.84			20.2	5.6		122	228.9	203.6	146.8	272.9		Not Found	Not Found	Peak Found	Peak Found	Not Found	Peak Found	High	High	High	High	High	7.602e-06	7.099e-07	1.93	35.28	Used	Used	K.SDPVVSFRETVLDR.S	[558-571]
	FALSE	High	[R].SKILAEEYGWDKDLAK.[K]		1.04784e-10	5.15092e-05	1	2	49	731362937	731362937 [617-632]		2	1865.96	6.3	43.4	20.1	17.9	2	232.6	152.6	173.5	106.5	245		High	High	Peak Found	Peak Found	Peak Found	High	High	High	High	High	High	7.602e-06	8.982e-14	5.29	28.08	Used	Used	R.SKILAEEYGWDKDLAK.K	[617-632]
	FALSE	High	[K].STGISLYYQMTDEALQSYK.[G]		1.07319e-08	5.15092e-05	1	2	5	731362937	731362937 [72-90]		0	2198.03	106.4	243.1	70.3	68.4	153.6	67.6	193.9	17.4	40.5	38.6		High	High	High	High	High	Peak Found	Peak Found	Peak Found	Peak Found	Peak Found	High	7.602e-06	2.328e-11	3.51	82.82	Used	Used	K.STGISLYYQMTDEALQSYK.G	[72-90]
	FALSE	High	[K].STGISLYYQMTDEALQSYKGER.[K]		2.11606e-13	5.15092e-05	1	2	101	731362937	731362937 [72-93]		1	2540.2	124.1	125	87.4	101.6	204.5	72.8	71.3	55.5	72.4	85.3		High	High	High	High	High	High	High	High	High	High	High	7.602e-06	8.597e-17	5.42	109.13	Used	Used	K.STGISLYYQMTDEALQSYKGER.K	[72-93]
	FALSE	High	[K].STGISLYYQMTDEALQSYKGER.[K]	1xOxidation [M10]	8.74143e-10	5.15092e-05	1	2	8	731362937	731362937 [72-93]		1	2556.19	9.1	49.5	20.3		238.6	442.2	64.4	53.5	60.6	61.8		Peak Found	High	Peak Found	Not Found	High	High	Peak Found	High	High	High	High	7.602e-06	1.152e-12	4.13	60.78	Used	Used	K.STGISLYYQMTDEALQSYKGER.K	[72-93]
	FALSE	High	[K].STGISLYYQMTDEALQSYKGERK.[G]		9.80499e-08	5.15092e-05	1	2	5	731362937	731362937 [72-94]		2	2668.29	10.3			30	3.1	92.5	88.5		500.4	275.1		Peak Found	Not Found	Not Found	Peak Found	Peak Found	Peak Found	High	Not Found	High	High	High	7.602e-06	3.306e-10	4	53.2	Used	Used	K.STGISLYYQMTDEALQSYKGERK.G	[72-94]
	FALSE	High	[K].STLTDSLVAAAGIIAQEVAGDVR.[M]		4.64741e-15	5.15092e-05	1	2	87	731362937	731362937 [33-55]		0	2257.2	190.2	268.1	236.3	163.2	34.8	28.2	12.9	24.5	28.1	13.7		High	High	High	High	High	High	High	High	High	High	High	7.602e-06	1.223e-18	6.25	109.92	Used	Used	K.STLTDSLVAAAGIIAQEVAGDVR.M	[33-55]
	FALSE	High	[K].TEEKDLMGK.[A]		0.00013916	5.15092e-05	1	1	11	731362937	731362937 [307-315]		1	1050.51	502.1	29.5	302.2	94.6	30.1	15.9	19.3			6.3		High	High	High	High	Peak Found	High	Peak Found	Not Found	Not Found	Peak Found	High	7.602e-06	2.002e-06	2.56	88.14	Used	Used	K.TEEKDLMGK.A	[307-315]
	FALSE	High	[R].TVIWMGK.[K]		0.00800392	0.000145442	1	2	71	731362937	731362937 [432-438]		0	834.454	76.1	84.8	96.1	65.3	24.2	97.4	149.6	105.9	191.1	109.4		High	High	High	High	High	High	High	High	High	High	High	3.817e-05	0.0002415	2.02	22.71	Used	Used	R.TVIWMGK.K	[432-438]
	FALSE	High	[R].TVIWMGK.[K]	1xOxidation [M5]	0.127035	0.0037884	1	2	5	731362937	731362937 [432-438]		0	850.449	199.3	4	232.2	42.3	56.1	44.3	151	35.8	163.1	72		Peak Found	Peak Found	Peak Found	Peak Found	Peak Found	Peak Found	High	Peak Found	High	Peak Found	High	0.0005523	0.009936	1.11	14.47	Used	Used	R.TVIWMGK.K	[432-438]
	FALSE	High	[R].TVIWMGKK.[Q]		0.0116425	0.000239412	1	2	4	731362937	731362937 [432-439]		1	962.549						381.4	369	42.3	161	46.4		Not Found	Not Found	Not Found	Not Found	Not Found	High	High	High	Peak Found	High	High	5.511e-05	0.0003693	1.72	13.89	Used	Used	R.TVIWMGKK.Q	[432-439]
	FALSE	High	[R].TVIWMGKKQETVEDVPCGNTVALVGLDQYITK.[N]	1xCarbamidomethyl [C17]	8.0047e-05	5.15092e-05	1	2	2	731362937	731362937 [432-463]		2	3592.84							484.4	126.5	125.6	263.5		Not Found	Not Found	Not Found	Not Found	Not Found	Not Found	High	Peak Found	Peak Found	High	High	7.602e-06	1.035e-06	3.61	56.15	Used	Used	R.TVIWMGKKQETVEDVPCGNTVALVGLDQYITK.N	[432-463]
	FALSE	High	[K].VASDLPK.[L]		0.0199052	0.000413429	1	2	3	731362937	731362937 [497-503]		0	729.414	342.2	259.3	91.5	54.5		122.3	44.3	35.1	26.5	24.3		High	Peak Found	Peak Found	Peak Found	High	Peak Found	Peak Found	Peak Found	Peak Found	Peak Found	High	7.97e-05	0.0006873	1.72	15.78	Used	Used	K.VASDLPK.L	[497-503]
	FALSE	High	[R].VENLYEGPMDDVYATAIR.[N]		1.70665e-05	5.15092e-05	1	2	4	731362937	731362937 [351-368]		0	2055.97		6.8		146.9	227.6	99.3	114.6	187.9	174.3	42.6		Not Found	Peak Found	Not Found	Peak Found	High	Peak Found	Peak Found	Peak Found	High	High	High	7.602e-06	1.616e-07	2.42	94.41	Used	Used	R.VENLYEGPMDDVYATAIR.N	[351-368]
	FALSE	High	[R].VFYASQLTAKPR.[L]		4.70481e-07	5.15092e-05	1	2	78	731362937	731362937 [713-724]		0	1380.76	54.3	52.6	4	52.3	120	230.3	165	75.3	115.1	131.1		High	High	High	High	High	High	High	High	High	High	High	7.602e-06	2.169e-09	3.42	10.63	Used	Used	R.VFYASQLTAKPR.L	[713-724]
	FALSE	High	[K].VIENANVIMATYEDPLLGDVQVYPEK.[G]		1.46413e-08	5.15092e-05	1	2	19	731362937	731362937 [181-206]		0	2920.46	104.5	135	91.6	144.2	261.7	96.1	28.1	52.5	46.7	39.7		High	High	High	High	High	Peak Found	High	Peak Found	Peak Found	High	High	7.602e-06	3.379e-11	2.93	103.38	Used	Used	K.VIENANVIMATYEDPLLGDVQVYPEK.G	[181-206]
	FALSE	High	[K].VIENANVIMATYEDPLLGDVQVYPEK.[G]	1xOxidation [M9]	7.64495e-06	5.15092e-05	1	2	3	731362937	731362937 [181-206]		0	2936.46	213.8	159.2	14.9	25	87.4	108.2	200.7	65.5	101.9	23.4		Peak Found	Peak Found	Peak Found	High	High	High	Peak Found	Peak Found	Peak Found	Peak Found	High	7.602e-06	6.178e-08	0.98	79.51	Used	Used	K.VIENANVIMATYEDPLLGDVQVYPEK.G	[181-206]
	FALSE	High	[R].VMQTWLPASSALLEMMIHHLPSPATAQR.[Y]		9.77624e-13	5.15092e-05	1	2	78	731362937	731362937 [321-348]		0	3116.58	124.4	155.7	158.9	121.2	21.9	108.9	75.6	50.9	132.1	50.4		High	High	High	High	High	High	High	High	High	High	High	7.602e-06	4.754e-16	5.29	109.22	Used	Used	R.VMQTWLPASSALLEMMIHHLPSPATAQR.Y	[321-348]
	FALSE	High	[R].VMQTWLPASSALLEMMIHHLPSPATAQR.[Y]	1xOxidation [M]	2.85017e-09	5.15092e-05	1	2	15	731362937	731362937 [321-348]		0	3132.58	151.7	372	161.9	145.1	24.8	63.2	34	11.8	10.8	24.6		High	High	High	High	Peak Found	High	High	Peak Found	Peak Found	High	High	7.602e-06	4.743e-12	7.61	108.6	Used	Used	R.VMQTWLPASSALLEMMIHHLPSPATAQR.Y	[321-348]
	FALSE	High	[R].VMQTWLPASSALLEMMIHHLPSPATAQR.[Y]	2xOxidation [M2; M15]	1.82282e-09	5.15092e-05	1	2	1	731362937	731362937 [321-348]		0	3148.57		181.1			562.7	132.6	79.1			44.5		Not Found	Peak Found	Not Found	Not Found	Peak Found	Peak Found	Peak Found	Not Found	Not Found	High	High	7.602e-06	2.763e-12	3.99	106.23	Used	Used	R.VMQTWLPASSALLEMMIHHLPSPATAQR.Y	[321-348]
	FALSE	High	[R].YRVENLYEGPMDDVYATAIR.[N]		8.59986e-12	5.15092e-05	1	2	171	731362937	731362937 [349-368]		1	2375.13	95.7	89.3	93.5	126.3	106.4	76	133.8	67.8	136	75.3		High	High	High	High	High	High	High	High	High	High	High	7.602e-06	5.355e-15	4.48	50.33	Used	Used	R.YRVENLYEGPMDDVYATAIR.N	[349-368]
	FALSE	High	[R].YRVENLYEGPMDDVYATAIR.[N]	1xOxidation [M11]	2.17235e-07	5.15092e-05	1	2	39	731362937	731362937 [349-368]		1	2391.13	71.9	77.5	10.2	197.1	276.5	146.5	90.2	18.1	57.2	55		High	High	Peak Found	High	High	High	High	High	High	High	High	7.602e-06	8.605e-10	2.78	98.73	Used	Used	R.YRVENLYEGPMDDVYATAIR.N	[349-368]
	FALSE	High	[R].YRVENLYEGPMDDVYATAIRNCDPEGPLMLYVSK.[M]	1xCarbamidomethyl [C22]	3.47072e-09	5.15092e-05	1	2	11	731362937	731362937 [349-382]		2	3978.87					1.6		423.4	170.2	126.5	278.3		Not Found	Not Found	Not Found	Not Found	Peak Found	Not Found	High	High	High	High	High	7.602e-06	5.984e-12	5.82	76.68	Used	Used	R.YRVENLYEGPMDDVYATAIRNCDPEGPLMLYVSK.M	[349-382]
	FALSE	High	[R].YRVENLYEGPMDDVYATAIRNCDPEGPLMLYVSK.[M]	1xCarbamidomethyl [C22]; 1xOxidation [M11]	0.00102744	5.15092e-05	1	2	2	731362937	731362937 [349-382]		2	3994.87				403.6						596.4		Not Found	Not Found	Not Found	Peak Found	Not Found	Not Found	Not Found	Not Found	Not Found	High	High	7.602e-06	2.196e-05	3.75	78.22	Used	Used	R.YRVENLYEGPMDDVYATAIRNCDPEGPLMLYVSK.M	[349-382]
FALSE		High	Master Protein	-6347917631231133902	519	1108923008	PREDICTED: 5-methyltetrahydropteroyltriglutamate--homocysteine methyltransferase [Beta vulgaris subsp. vulgaris]	MASGSSSSEMASHIVGYPRMGPKRELKFALESFWDGKSSADDLKKVSADLRSSIWKQMSDAGIKYIPSNTFAYYDQVLDTTAMLGAVPPRYGWTGGEIEFDVYFSMARGNATVPAMEMTKWFDTNYHYIVPELGPDVKFSYASHKAVNEYKEAKALGVDTVPVLVGPVSYLLLSKPAKGVEKSFNLLSLLPKILAIYKEVVTELKAAGASCIQFDEPLLVMDLDSHKLQAFTDAYAELESTLSGLNVIVETYFADVTPEAYKTLISLKGVTGFGFDLIRGTQSLELIKGGFPSDKYLFAGVVDGRNIWANDLAASLALLQSLQGLVGKDKLVVSTSCSLLHTAVDLVNETKLDDEIKSWLAFAAQKVVEVNALAKALSGQKDEAFFSANAAAQASRKSS…	>gi|1108923008|ref|XP_010677810.2| PREDICTED: 5-methyltetrahydropteroyltriglutamate--homocysteine methyltransferase [Beta vulgaris subsp. vulgaris]	0	1331.46	88	82	2980	68	68	774	85.5	6.47	6884.09	88	2980	82	15	177.2	130.8	112.8	120.1	124.4	96.5	60.3	54.2	57.9	65.7	4.09189e+09	2.48533e+09	1.53695e+09	2.1076e+09	3.78286e+09	9.86318e+08	1.36811e+09	1.34973e+09	1.68645e+09	3.27603e+09	8.83224e+09	6.52204e+09	5.62439e+09	5.98843e+09	6.20254e+09
	Checked	Confidence	Annotated Sequence	Modifications	Qvality PEP	Qvality q-value	# Protein Groups	# Proteins	# PSMs	Master Protein Accessions	Positions in Master Proteins	Modifications in Master Proteins	# Missed Cleavages	Theo. MH+ [Da]	Abundances (Scaled): F1: Control	Abundances (Scaled): F2: Control	Abundances (Scaled): F3: Control	Abundances (Scaled): F4: Control	Abundances (Scaled): F5: Control	Abundances (Scaled): F6: Sample	Abundances (Scaled): F7: Sample	Abundances (Scaled): F8: Sample	Abundances (Scaled): F9: Sample	Abundances (Scaled): F10: Sample	Quan Info	Found in Sample: [S1] F1: Control	Found in Sample: [S2] F2: Control	Found in Sample: [S3] F3: Control	Found in Sample: [S4] F4: Control	Found in Sample: [S5] F5: Control	Found in Sample: [S6] F6: Sample	Found in Sample: [S7] F7: Sample	Found in Sample: [S8] F8: Sample	Found in Sample: [S9] F9: Sample	Found in Sample: [S10] F10: Sample	Confidence (by Search Engine): Sequest HT	Percolator q-Value (by Search Engine): Sequest HT	Percolator PEP (by Search Engine): Sequest HT	XCorr (by Search Engine): Sequest HT	Top Apex RT [min]	Quan Usage	Quan Ratio Usage	Sequence in Protein	Positions in Proteins
	FALSE	High	[K].AAAGLKGSDHRR.[A]		0.14206	0.00450068	1	1	1	1108923008	1108923008 [410-421]		2	1238.67		79.8		54.7				800.9		64.5		Not Found	Peak Found	Not Found	Peak Found	Not Found	Not Found	Not Found	High	Not Found	Peak Found	High	0.0006609	0.01205	1.29	72.9	Used	Used	K.AAAGLKGSDHRR.A	[410-421]
	FALSE	High	[K].AAGASCIQFDEPLLVMDLDSHK.[L]	1xCarbamidomethyl [C6]	4.03381e-11	5.15092e-05	1	1	14	1108923008	1108923008 [206-227]		0	2417.15	302.4	167.2	70.5	113.2	294.4	11.2	1.8	16.2	8.5	14.5		High	High	High	High	High	Peak Found	Peak Found	Peak Found	High	High	High	7.602e-06	2.992e-14	4.89	109.66	Used	Used	K.AAGASCIQFDEPLLVMDLDSHK.L	[206-227]
	FALSE	High	[K].AGINVIQIDEAALR.[E]		7.69861e-07	5.15092e-05	1	1	55	1108923008	1108923008 [606-619]		0	1482.83	116.4	99.8	68	182.4	215	35.4	54.1	65.3	70	93.6		High	High	High	High	High	High	High	High	High	High	High	7.602e-06	3.913e-09	3.34	47.46	Used	Used	K.AGINVIQIDEAALR.E	[606-619]
	FALSE	High	[K].AGINVIQIDEAALREGLPLR.[K]		7.30522e-06	5.15092e-05	1	1	2	1108923008	1108923008 [606-625]		1	2148.21				32.7			472.5	304.3	178	12.5		Not Found	Not Found	Not Found	Peak Found	Not Found	Not Found	High	Peak Found	High	Peak Found	High	7.602e-06	5.812e-08	3.68	62.43	Used	Used	K.AGINVIQIDEAALREGLPLR.K	[606-625]
	FALSE	High	[K].ALGVDTVPVLVGPVSYLLLSKPAK.[G]		3.94085e-12	5.15092e-05	1	1	113	1108923008	1108923008 [155-178]		0	2436.45	291.5	105.4	53.4	159	110.9	74.8	49.5	64.7	64.8	26		High	High	High	High	High	High	High	High	High	High	High	7.602e-06	2.241e-15	4.13	114.64	Used	Used	K.ALGVDTVPVLVGPVSYLLLSKPAK.G	[155-178]
	FALSE	High	[K].ALGVDTVPVLVGPVSYLLLSKPAKGVEK.[S]		1.05643e-09	5.15092e-05	1	1	7	1108923008	1108923008 [155-182]		1	2849.68						231.7	162.2	314.1	164.1	127.9		Not Found	Not Found	Not Found	Not Found	Not Found	High	High	High	High	High	High	7.602e-06	1.442e-12	4.46	70.45	Used	Used	K.ALGVDTVPVLVGPVSYLLLSKPAKGVEK.S	[155-182]
	FALSE	High	[K].AIKEEINK.[V]		0.00371363	0.000100671	1	1	2	1108923008	1108923008 [475-482]		1	944.541	924.4		15	13.1		25.9		6.8	5.2	9.5		High	Not Found	Peak Found	Peak Found	Not Found	Peak Found	Not Found	Peak Found	Peak Found	Peak Found	High	1.369e-05	9.985e-05	2.36	88.76	Used	Used	K.AIKEEINK.V	[475-482]
	FALSE	High	[K].AIKEEINKVVK.[L]		7.76168e-06	5.15092e-05	1	1	61	1108923008	1108923008 [475-485]		2	1270.77	32.1	47.2	11.4	43.5	135.4	205.6	148.2	102.8	146.9	126.8		High	High	High	High	High	High	High	High	High	High	High	7.602e-06	6.263e-08	2.13	8.42	Used	Used	K.AIKEEINKVVK.L	[475-485]
	FALSE	High	[K].ALSGQKDEAFFSANAAAQASR.[K]		6.44473e-13	5.15092e-05	1	1	66	1108923008	1108923008 [376-396]		1	2140.04	108.5	86.6	51.5	132	61.5	80.3	139.5	114.4	86.8	138.8		High	High	High	High	High	High	High	High	High	High	High	7.602e-06	2.99e-16	4.07	22.25	Used	Used	K.ALSGQKDEAFFSANAAAQASR.K	[376-396]
	FALSE	High	[K].ALSGQKDEAFFSANAAAQASRK.[S]		2.23e-14	5.15092e-05	1	1	19	1108923008	1108923008 [376-397]		2	2268.14	71.1		29.5	18.4		230.4	90.7	88.5	71.1	400.2		High	Not Found	Peak Found	Peak Found	Not Found	High	High	High	High	High	High	7.602e-06	6.991e-18	5.41	10.4	Used	Used	K.ALSGQKDEAFFSANAAAQASRK.S	[376-397]
	FALSE	High	[R].ATNVSARLDAQQK.[K]		1.25974e-06	5.15092e-05	1	1	8	1108923008	1108923008 [422-434]		1	1401.74	64.2		279.7	163.8		109.7	94.4	219.5	11.5	57.1		Peak Found	Not Found	Peak Found	Peak Found	Not Found	High	High	High	High	High	High	7.602e-06	7.08e-09	4.02	10.49	Used	Used	R.ATNVSARLDAQQK.K	[422-434]
	FALSE	High	[R].CVKPPIIYGDVSRPNPMTVFWSSAAQSMTSRPMK.[G]	1xCarbamidomethyl [C1]	1.17395e-10	5.15092e-05	1	1	12	1108923008	1108923008 [531-564]		0	3838.89	305.3	217.7	64.4	102.5		10.3	42.7	84.1	101.4	71.6		High	High	High	High	Not Found	Peak Found	High	High	High	High	High	7.602e-06	1.034e-13	5.56	115.71	Used	Used	R.CVKPPIIYGDVSRPNPMTVFWSSAAQSMTSRPMK.G	[531-564]
	FALSE	High	[R].CVKPPIIYGDVSRPNPMTVFWSSAAQSMTSRPMK.[G]	1xCarbamidomethyl [C1]; 1xOxidation [M33]	1.32836e-06	5.15092e-05	1	1	2	1108923008	1108923008 [531-564]		0	3854.88		1000										Not Found	High	Not Found	Not Found	Not Found	Not Found	Not Found	Not Found	Not Found	Not Found	High	7.602e-06	7.518e-09	6.29	106.67	Used	Used	R.CVKPPIIYGDVSRPNPMTVFWSSAAQSMTSRPMK.G	[531-564]
	FALSE	High	[K].DEAFFSANAAAQASR.[K]		0.000110871	5.15092e-05	1	1	4	1108923008	1108923008 [382-396]		0	1555.71	39.3	17	43	262.3	65.6	57	169.2	154.3	156.8	35.4		High	Peak Found	Peak Found	High	High	Peak Found	Peak Found	Peak Found	Peak Found	Peak Found	High	7.602e-06	1.53e-06	1.15	63.75	Used	Used	K.DEAFFSANAAAQASR.K	[382-396]
	FALSE	High	[R].EGLPLRK.[S]		0.073502	0.00157116	2	2	6	1108923008; 731348458	1108923008 [620-626]; 731348458 [663-669]		1	812.499	124.1	165.1	82.3	41.1	214	195.7	1.2	103.1	4	69.5	Shared	High	High	High	High	High	Peak Found	Peak Found	Peak Found	Peak Found	Peak Found	High	0.0002371	0.00399	1.4	8.62	Used	Used	R.EGLPLRK.S	[620-626]
	FALSE	High	[R].EGVKYGAGIGPGVYDIHSPR.[I]		3.60471e-09	5.15092e-05	2	2	24	1108923008; 731348458	1108923008 [694-713]; 731348458 [737-756]		1	2072.06	0.8	9.3	57.1	36.6	8.1	238.4	217.8	185.4	109.9	136.6	Shared	Peak Found	Peak Found	Peak Found	Peak Found	Peak Found	High	High	High	High	High	High	7.602e-06	6.295e-12	4.06	21.75	Used	Used	R.EGVKYGAGIGPGVYDIHSPR.I	[694-713]
	FALSE	High	[R].ELKFALESFWDGK.[SI]		0.00287305	0.000100671	2	2	2	1108923008; 731348458	1108923008 [25-37]; 731348458 [68-80]		1	1569.79	35		41.8	58.7		317.7	546.9				Shared	Peak Found	Not Found	Peak Found	Peak Found	Not Found	High	High	Not Found	Not Found	Not Found	High	1.369e-05	7.414e-05	2.55	58.71	Used	Used	R.ELKFALESFWDGK.S	[25-37]
	FALSE	High	[K].EVVTELK.[A]		0.164741	0.00550965	1	1	2	1108923008	1108923008 [199-205]		0	817.467	270.1	4.2	451.6	274.2								High	Peak Found	High	Peak Found	Not Found	Not Found	Not Found	Not Found	Not Found	Not Found	High	0.0008213	0.01573	1.74	9.73	Used	Used	K.EVVTELK.A	[199-205]
	FALSE	High	[K].FALESFWDGK.[SI]		8.24665e-06	5.15092e-05	2	2	159	1108923008; 731348458	1108923008 [28-37]; 731348458 [71-80]		0	1199.57	204.3	125.6	148.1	132.2	256.7	39.5	23.8	15.4	26.3	28	Shared	High	High	High	High	High	High	High	High	High	High	High	7.602e-06	6.774e-08	2.34	105.05	Used	Used	K.FALESFWDGK.S	[28-37]
	FALSE	High	[K].FALESFWDGKSSADDLK.[K]		4.22885e-08	5.15092e-05	1	1	4	1108923008	1108923008 [28-44]		1	1915.91	1.7	3.2	4.9	68	2.2	95.1	198.7	179.2	248.5	198.6		Peak Found	Peak Found	Peak Found	Peak Found	Peak Found	Peak Found	High	Peak Found	Peak Found	High	High	7.602e-06	1.205e-10	3.74	50.11	Used	Used	K.FALESFWDGKSSADDLK.K	[28-44]
	FALSE	High	[K].FALESFWDGKSSADDLKK.[V]		3.57541e-10	5.15092e-05	1	1	158	1108923008	1108923008 [28-45]		2	2044	74	94.7	66.9	32.2	30.2	234.4	128.6	77.3	138.2	123.4		High	High	High	High	High	High	High	High	High	High	High	7.602e-06	3.94e-13	4.24	38.86	Used	Used	K.FALESFWDGKSSADDLKK.V	[28-45]
	FALSE	High	[K].FSYASHK.[A]		0.00597001	0.000145442	1	1	16	1108923008	1108923008 [139-145]		0	839.405	278.8	162.6	396	109.8	32.3	10.5	0.3	5.4	2	2.2		High	High	High	High	High	Peak Found	Peak Found	Peak Found	Peak Found	Peak Found	High	3.22e-05	0.0001722	1.79	89.2	Used	Used	K.FSYASHK.A	[139-145]
	FALSE	High	[K].FSYASHKAVNEYKEAK.[A]		2.56636e-07	5.15092e-05	1	1	2	1108923008	1108923008 [139-154]		2	1871.93	33		241.8	165		165.7		252.3	51.6	90.7		Peak Found	Not Found	Peak Found	Peak Found	Not Found	Peak Found	Not Found	High	Peak Found	High	High	7.602e-06	1.045e-09	3.84	11.48	Used	Used	K.FSYASHKAVNEYKEAK.A	[139-154]
	FALSE	High	[K].GGFPSDKYLFAGVVDGR.[N]		2.20293e-09	5.15092e-05	1	1	90	1108923008	1108923008 [289-305]		1	1784.9	231.4	69.5	89.8	192.8	165.7	62.7	13.3	58.1	32.1	84.5		High	High	High	High	High	High	High	High	High	High	High	7.602e-06	3.463e-12	2.7	107.44	Used	Used	K.GGFPSDKYLFAGVVDGR.N	[289-305]
	FALSE	High	[K].GMLTGPVTILNWSFVR.[N]		6.70929e-09	5.15092e-05	2	2	98	1108923008; 731348458	1108923008 [565-580]; 731348458 [608-623]		0	1790.96	236.8	184.3	57.9	136.7	42.6	157.9	35.8	43.3	47.6	57.1	Shared	High	High	High	High	High	High	High	High	High	High	High	7.602e-06	1.323e-11	3.6	115.25	Used	Used	K.GMLTGPVTILNWSFVR.N	[565-580]
	FALSE	High	[K].GMLTGPVTILNWSFVR.[N]	1xOxidation [M2]	1.83776e-08	5.15092e-05	2	2	31	1108923008; 731348458	1108923008 [565-580]; 731348458 [608-623]		0	1806.96	182.1	234	81.7	123.7	256.3	60.7	22.6	9.2	17.3	12.4	Shared	High	High	High	High	High	High	High	High	High	High	High	7.602e-06	4.418e-11	4.32	112.46	Used	Used	K.GMLTGPVTILNWSFVR.N	[565-580]
	FALSE	High	[R].GNATVPAMEMTK.[W]		2.47241e-06	5.15092e-05	1	1	27	1108923008	1108923008 [109-120]		0	1249.59	67	6.3	84.6	75	64.2	92.8	154.6	130.9	173.1	151.5		High	High	High	High	High	Peak Found	High	High	High	High	High	7.602e-06	1.596e-08	2.35	14.65	Used	Used	R.GNATVPAMEMTK.W	[109-120]
	FALSE	High	[R].GNATVPAMEMTKWFDTNYHYIVPELGPDVK.[F]		0.00223911	0.000100671	1	1	4	1108923008	1108923008 [109-138]		1	3423.64						256		204.5	58.6	480.9		Not Found	Not Found	Not Found	Not Found	Not Found	Peak Found	Not Found	High	Peak Found	High	High	1.369e-05	5.523e-05	2.94	81.98	Used	Used	R.GNATVPAMEMTKWFDTNYHYIVPELGPDVK.F	[109-138]
	FALSE	High	[R].GTQSLELIK.[G]		0.0039745	0.000100671	1	1	29	1108923008	1108923008 [280-288]		0	988.567	88.9	79.3	210.7	299.5	33.8	78.1	48	48.4	96.8	16.5		High	High	High	High	High	Peak Found	High	Peak Found	High	High	High	1.369e-05	0.0001077	2.02	18.27	Used	Used	R.GTQSLELIK.G	[280-288]
	FALSE	High	[K].GVTGFGFDLIR.[G]		6.8756e-06	5.15092e-05	1	1	96	1108923008	1108923008 [269-279]		0	1181.63	220.5	200.8	164.4	159.8	139.1	43.5	10.6	12.2	25.9	23.2		High	High	High	High	High	High	High	High	High	High	High	7.602e-06	5.432e-08	2.75	104.65	Used	Used	K.GVTGFGFDLIR.G	[269-279]
	FALSE	High	[R].HETCYQIALAIKDEVEDLEK.[A]	1xCarbamidomethyl [C4]	2.45649e-17	5.15092e-05	1	1	88	1108923008	1108923008 [586-605]		1	2404.17	402.7	142.5	181.7	94.2	79.8	65.5	9.2	4.2	13.6	6.7		High	High	High	High	High	High	High	High	High	High	High	7.602e-06	3.523e-21	7.07	104.39	Used	Used	R.HETCYQIALAIKDEVEDLEK.A	[586-605]
	FALSE	High	[R].HETCYQIALAIKDEVEDLEKAGINVIQIDEAALR.[E]	1xCarbamidomethyl [C4]	1.64217e-19	5.15092e-05	1	1	23	1108923008	1108923008 [586-619]		2	3867.98	71.6	192.5	176.9	169.3	17	128.8	59.1	48	105.5	31.2		High	High	High	High	High	High	High	High	High	High	High	7.602e-06	1.334e-23	8.4	109.14	Used	Used	R.HETCYQIALAIKDEVEDLEKAGINVIQIDEAALR.E	[586-619]
	FALSE	High	[K].KLNLPILPTTTIGSFPQTVELR.[R]		9.41836e-12	5.15092e-05	1	1	51	1108923008	1108923008 [435-456]		1	2438.4	152.3	29.5	32.9	121.1	197.6	185.8	67	60.2	29.5	124.3		High	High	High	High	High	High	High	High	High	High	High	7.602e-06	5.943e-15	5.27	111.84	Used	Used	K.KLNLPILPTTTIGSFPQTVELR.R	[435-456]
	FALSE	High	[K].KLNLPILPTTTIGSFPQTVELRR.[V]		2.98448e-08	5.15092e-05	1	1	95	1108923008	1108923008 [435-457]		2	2594.5	47.2	86	93.2	70.8	10.7	280	155.2	86.7	55.8	114.4		High	High	High	High	High	High	High	High	High	High	High	7.602e-06	7.91e-11	3.91	54.75	Used	Used	K.KLNLPILPTTTIGSFPQTVELRR.V	[435-457]
	FALSE	High	[K].KISEEEYVK.[A]		1.16851e-05	5.15092e-05	1	1	37	1108923008	1108923008 [466-474]		1	1124.58	111	75.9	71.4	96.1	8	290.6	117.6	105.8	97.1	26.4		High	High	High	High	High	High	High	High	High	High	High	7.602e-06	1.023e-07	2.86	7.99	Used	Used	K.KISEEEYVK.A	[466-474]
	FALSE	High	[R].KMLAVLESNVLWVNPDCGLK.[T]	1xCarbamidomethyl [C17]	3.79213e-13	5.15092e-05	1	1	24	1108923008	1108923008 [726-745]		1	2286.2	300.6	76.1	53.1	98	58.3	132.9	76.7	61.5	59	83.9		High	High	High	High	Peak Found	High	High	High	High	High	High	7.602e-06	1.646e-16	5.75	112.65	Used	Used	R.KMLAVLESNVLWVNPDCGLK.T	[726-745]
	FALSE	High	[R].KMLAVLESNVLWVNPDCGLK.[T]	1xCarbamidomethyl [C17]; 1xOxidation [M2]	9.97141e-05	5.15092e-05	1	1	3	1108923008	1108923008 [726-745]		1	2302.19			57			710.1	28.5	10.8	8.4	185.3		Not Found	Not Found	Peak Found	Not Found	Not Found	High	Peak Found	Peak Found	Peak Found	High	High	7.602e-06	1.339e-06	2.67	66.3	Used	Used	R.KMLAVLESNVLWVNPDCGLK.T	[726-745]
	FALSE	High	[R].KMLAVLESNVLWVNPDCGLKTR.[K]	1xCarbamidomethyl [C17]	2.41543e-07	5.15092e-05	1	1	3	1108923008	1108923008 [726-747]		2	2543.35				82.7		133.7	133.2	290.9	112.1	247.5		Not Found	Not Found	Not Found	Peak Found	Not Found	Peak Found	Peak Found	High	Peak Found	High	High	7.602e-06	9.758e-10	5.52	57.96	Used	Used	R.KMLAVLESNVLWVNPDCGLKTR.K	[726-747]
	FALSE	High	[R].KSEHGFYLK.[W]		0.000198671	5.15092e-05	1	1	7	1108923008	1108923008 [626-634]		1	1108.58	187.1	359.2	5.4	208.6	218.7			11.6	4.1	5.3		High	High	Peak Found	High	High	Not Found	Not Found	Peak Found	Peak Found	High	High	7.602e-06	3.068e-06	2.49	105.83	Used	Used	R.KSEHGFYLK.W	[626-634]
	FALSE	High	[R].KYGEVQPALLNMVAAAK.[Q]		3.96848e-13	5.15092e-05	1	1	128	1108923008	1108923008 [748-764]		1	1802.98	94.2	137.2	41.3	66.4	171.1	82.1	107.5	77	77.6	145.6		High	High	High	High	High	High	High	High	High	High	High	7.602e-06	1.732e-16	5.48	38.89	Used	Used	R.KYGEVQPALLNMVAAAK.Q	[748-764]
	FALSE	High	[R].KYGEVQPALLNMVAAAK.[Q]	1xOxidation [M12]	3.00894e-07	5.15092e-05	1	1	35	1108923008	1108923008 [748-764]		1	1818.98	29.3	69.2	78.1	76	13	402.9	112.8	54	52.8	111.9		High	High	High	High	High	High	High	High	High	High	High	7.602e-06	1.272e-09	2.88	95.59	Used	Used	R.KYGEVQPALLNMVAAAK.Q	[748-764]
	FALSE	High	[R].LDAQQKKLNLPILPTTTIGSFPQTVELR.[R]		2.12353e-07	5.15092e-05	1	1	4	1108923008	1108923008 [429-456]		2	3121.76						74.3	891.2	34.4				Not Found	Not Found	Not Found	Not Found	Not Found	Peak Found	High	High	Not Found	High	High	7.602e-06	8.35e-10	5.46	55.87	Used	Used	R.LDAQQKKLNLPILPTTTIGSFPQTVELR.R	[429-456]
	FALSE	High	[K].LDDEIKSWLAFAAQK.[V]		6.41866e-07	5.15092e-05	1	1	9	1108923008	1108923008 [352-366]		1	1734.91	173.4	277.2	176.1	67	183	40.6	34.7	24	8.6	15.5		High	High	High	High	High	Peak Found	Peak Found	Peak Found	Peak Found	Peak Found	High	7.602e-06	3.141e-09	3.44	99.56	Used	Used	K.LDDEIKSWLAFAAQK.V	[352-366]
	FALSE	High	[K].ILAIYKEVVTELK.[A]		1.66734e-06	5.15092e-05	1	1	21	1108923008	1108923008 [193-205]		1	1518.91	339.9	337.7	107.6	100.9	21.3	36	14.1	3	24.1	15.2		High	High	High	High	High	High	Peak Found	Peak Found	High	High	High	7.602e-06	9.866e-09	3.33	112.25	Used	Used	K.ILAIYKEVVTELK.A	[193-205]
	FALSE	High	[KR].LLSVFR.[EK]		0.0680234	0.00157116	2	3	72	1108923008; 731348458	1108923008 [688-693]; 731348458 [731-736]		0	734.456	227.3	213.6	89.5	71.3		111	57.5	49.6	79.1	101.1	Shared	High	High	High	High	Not Found	High	High	High	High	High	High	0.0002371	0.003521	1.36	90.81	Used	Used	K.LLSVFR.E	[688-693]
	FALSE	High	[K].LLSVFREGVK.[Y]		0.000389842	5.15092e-05	2	2	2	1108923008; 731348458	1108923008 [688-697]; 731348458 [731-740]		1	1147.68	61.8	24.3	5.3	23.4	62.1	27.4	28.8	272.1	237.3	257.5	Shared	Peak Found	Peak Found	Peak Found	Peak Found	Peak Found	Peak Found	Peak Found	High	Peak Found	High	High	7.602e-06	6.88e-06	2.7	22	Used	Used	K.LLSVFREGVK.Y	[688-697]
	FALSE	High	[K].LNLPILPTTTIGSFPQTVELR.[R]		1.1323e-07	5.15092e-05	1	1	26	1108923008	1108923008 [436-456]		0	2310.31	116.7	55.3	105.3	98	216.9	17.2	113.3	143	49.2	85.2		High	High	High	High	High	High	High	High	High	High	High	7.602e-06	3.939e-10	3.44	77.68	Used	Used	K.LNLPILPTTTIGSFPQTVELR.R	[436-456]
	FALSE	High	[K].LNLPILPTTTIGSFPQTVELRR.[V]		5.68257e-08	5.15092e-05	1	1	16	1108923008	1108923008 [436-457]		1	2466.41	71.1	8	7.2	75	102.5	276.4	170.2	130	75	84.4		Peak Found	Peak Found	Peak Found	High	High	High	High	High	High	High	High	7.602e-06	1.711e-10	3.93	63.42	Used	Used	K.LNLPILPTTTIGSFPQTVELRR.V	[436-457]
	FALSE	High	[R].IPPTEEIADR.[I]		0.000420511	5.15092e-05	1	1	40	1108923008	1108923008 [714-723]		0	1140.59	161.5	58.1	186.7	219.7	79.7	15.6	58.2	76.9	60.9	82.7		High	High	High	High	High	High	High	High	Peak Found	High	High	7.602e-06	7.544e-06	0.9	13.98	Used	Used	R.IPPTEEIADR.I	[714-723]
	FALSE	High	[R].IPPTEEIADRIR.[K]		4.36408e-06	5.15092e-05	1	1	68	1108923008	1108923008 [714-725]		1	1409.77	0.4	4.9	60.7	94.8	147.4	118.6	124.5	171.6	96.4	180.7		High	High	High	High	High	High	High	High	High	High	High	7.602e-06	3.152e-08	3.38	21.94	Used	Used	R.IPPTEEIADRIR.K	[714-725]
	FALSE	High	[R].IPPTEEIADRIRK.[M]		0.0208103	0.000413429	1	1	1	1108923008	1108923008 [714-726]		2	1537.87	79.7		232.3	245		34.6				408.4		Peak Found	Not Found	Peak Found	Peak Found	Not Found	Peak Found	Not Found	Not Found	Not Found	High	High	7.97e-05	0.0007262	2.65	20.27	Used	Used	R.IPPTEEIADRIRK.M	[714-726]
	FALSE	High	[K].LQAFTDAYAELESTLSGLNVIVETYFADVTPEAYK.[T]		1.00127e-10	5.15092e-05	1	1	18	1108923008	1108923008 [228-262]		0	3868.91	113.4	270.8	365.1	177.9	56	5	0.7	1.7	6.6	2.9		High	High	High	High	High	Peak Found	Peak Found	Peak Found	Peak Found	Peak Found	High	7.602e-06	8.517e-14	5.05	109.82	Used	Used	K.LQAFTDAYAELESTLSGLNVIVETYFADVTPEAYK.T	[228-262]
	FALSE	High	[K].ISEEEYVK.[A]		0.00104311	5.15092e-05	1	1	26	1108923008	1108923008 [467-474]		0	996.488	95.8	14.4	195	125.3	25.1	96.5	95.5	127.9	128.1	96.4		High	High	High	High	High	High	High	High	High	High	High	7.602e-06	2.231e-05	1.54	13.18	Used	Used	K.ISEEEYVK.A	[467-474]
	FALSE	High	[R].ITNVGVQDTCQIHTHMCYSNFNDIIHSIIDMDADVITIENSR.[S]	2xCarbamidomethyl [C10; C17]	0.0011082	5.15092e-05	1	1	4	1108923008	1108923008 [642-683]		0	4890.26	140.4	137.8	223.7	497.8						0.4		Peak Found	High	High	Peak Found	Not Found	Not Found	Not Found	Not Found	Not Found	Peak Found	High	7.602e-06	2.407e-05	3.67	108.74	Used	Used	R.ITNVGVQDTCQIHTHMCYSNFNDIIHSIIDMDADVITIENSR.S	[642-683]
	FALSE	High	[K].LVVSTSCSLLHTAVDLVNETK.[L]	1xCarbamidomethyl [C7]	8.82344e-07	5.15092e-05	2	2	8	1108923008; 731348458	1108923008 [331-351]; 731348458 [374-394]		0	2286.2	423.3	66.4	52.4	232.3	170.3	15.8	8.5	3	8.7	19.2	Shared	High	High	High	High	High	Peak Found	Peak Found	Peak Found	Peak Found	Peak Found	High	7.602e-06	4.607e-09	4.86	112.65	Used	Used	K.LVVSTSCSLLHTAVDLVNETK.L	[331-351]
	FALSE	High	[K].LVVSTSCSLLHTAVDLVNETKLDDEIK.[S]	1xCarbamidomethyl [C7]	4.61504e-14	5.15092e-05	1	1	4	1108923008	1108923008 [331-357]		1	2999.56	545.6	154.5	62.6	53.7	25.6	34.9	58.4	32.2	25.3	7.2		High	High	High	Peak Found	Peak Found	Peak Found	Peak Found	Peak Found	Peak Found	Peak Found	High	7.602e-06	1.576e-17	6.77	108.3	Used	Used	K.LVVSTSCSLLHTAVDLVNETKLDDEIK.S	[331-357]
	FALSE	High	[K].LVVSTSCSLLHTAVDLVNETKLDDEIKSWLAFAAQK.[V]	1xCarbamidomethyl [C7]	4.28586e-11	5.15092e-05	1	1	39	1108923008	1108923008 [331-366]		2	4002.09	220.3	186.6	281.2	170.8	26.2	32.7	17.9	12.9	36.1	15.3		High	High	High	High	High	High	High	High	High	High	High	7.602e-06	3.201e-14	6.38	108.92	Used	Used	K.LVVSTSCSLLHTAVDLVNETKLDDEIKSWLAFAAQK.V	[331-366]
	FALSE	High	[-].MASGSSSSEMASHIVGYPR.[M]	1xMet-loss+Acetyl [N-Term]	1.81534e-16	5.15092e-05	1	1	87	1108923008	1108923008 [1-19]	1108923008 1xMet-loss+Acetyl [N-Term]	0	1864.85	52.5	9.6	101.4	68.4	24.8	48.7	110.6	285.6	104.3	194.3		High	High	High	High	High	High	High	High	High	High	High	7.602e-06	3.276e-20	5.08	29.01	Used	Used	-.MASGSSSSEMASHIVGYPR.M	[1-19]
	FALSE	High	[-].MASGSSSSEMASHIVGYPR.[M]	1xOxidation [M10]; 1xMet-loss+Acetyl [N-Term]	5.07807e-06	5.15092e-05	1	1	19	1108923008	1108923008 [1-19]	1108923008 1xMet-loss+Acetyl [N-Term]	0	1880.84	25.8	2.4	64	62.8	62.4	36.9	141.1	415.7	52.7	136.2		High	Peak Found	High	High	High	High	High	High	High	High	High	7.602e-06	3.766e-08	2.38	28.09	Used	Used	-.MASGSSSSEMASHIVGYPR.M	[1-19]
	FALSE	High	[K].MLAVLESNVLWVNPDCGLK.[T]	1xCarbamidomethyl [C16]	6.50519e-10	5.15092e-05	1	1	14	1108923008	1108923008 [727-745]		0	2158.1	168.3	164.2	3	33	46.1	153.2	130.8	124.2	88.9	88.3		High	High	Peak Found	Peak Found	Peak Found	High	High	High	High	High	High	7.602e-06	8.068e-13	3.89	109.78	Used	Used	K.MLAVLESNVLWVNPDCGLK.T	[727-745]
	FALSE	High	[K].MLAVLESNVLWVNPDCGLKTR.[K]	1xCarbamidomethyl [C16]	9.07891e-10	5.15092e-05	1	1	1	1108923008	1108923008 [727-747]		1	2415.25	99.1			141.7			65.5	693.7				Peak Found	Not Found	Not Found	Peak Found	Not Found	Not Found	Peak Found	High	Not Found	Not Found	High	7.602e-06	1.204e-12	3.84	61.22	Used	Used	K.MLAVLESNVLWVNPDCGLKTR.K	[727-747]
	FALSE	High	[R].NDQPRHETCYQIALAIKDEVEDLEK.[A]	1xCarbamidomethyl [C9]	1.86801e-06	5.15092e-05	1	1	5	1108923008	1108923008 [581-605]		2	3014.45						829.1		19.9		151		Not Found	Not Found	Not Found	Not Found	Not Found	High	Not Found	Peak Found	Not Found	High	High	7.602e-06	1.138e-08	3.11	92.16	Used	Used	R.NDQPRHETCYQIALAIKDEVEDLEK.A	[581-605]
	FALSE	High	[R].NIWANDLAASLALLQSLQGLVGK.[D]		6.95197e-13	5.15092e-05	1	1	17	1108923008	1108923008 [306-328]		0	2395.33	273.2	311	133.9	181.9	72.6	5.6	4.9		10.4	6.6		High	High	High	High	High	Peak Found	High	Not Found	High	Peak Found	High	7.602e-06	3.239e-16	5.77	109.69	Used	Used	R.NIWANDLAASLALLQSLQGLVGK.D	[306-328]
	FALSE	High	[R].NIWANDLAASLALLQSLQGLVGKDK.[L]		1.00711e-13	5.15092e-05	1	1	35	1108923008	1108923008 [306-330]		1	2638.46	264.6	186.7	276	172.2	48.2	4.5	5.7	7	27.1	7.8		High	High	High	High	High	High	High	High	High	High	High	7.602e-06	3.77e-17	6.12	110.09	Used	Used	R.NIWANDLAASLALLQSLQGLVGKDK.L	[306-330]
	FALSE	High	[K].QLRQELASAK.[-]		0.000614052	5.15092e-05	1	1	48	1108923008	1108923008 [765-774]		1	1143.65	39.8	63.2	63.6	101.9	4.5	282.7	129.5	194.9	81.6	38.4		High	High	High	High	High	High	High	High	High	High	High	7.602e-06	1.183e-05	3.75	10.33	Used	Used	K.QLRQELASAK.-	[765-774]
	FALSE	High	[K].QLRQELASAK.[-]	1xGG [K10]	0.027754	0.000679979	1	1	3	1108923008	1108923008 [765-774]		1	1257.69							256.2	229.6	331.6	182.5		Not Found	Not Found	Not Found	Not Found	Not Found	Not Found	Peak Found	High	High	High	High	0.0001224	0.001032	1.97	10.81	Used	Used	K.QLRQELASAK.-	[765-774]
	FALSE	High	[K].QMSDAGIK.[Y]		0.168974	0.00570726	2	2	1	1108923008; 731348458	1108923008 [57-64]; 731348458 [100-107]		0	849.413				241.9	444.7	125.6	128.6		58.9	0.3	Shared	Not Found	Not Found	Not Found	Peak Found	High	Peak Found	Peak Found	Not Found	Peak Found	Peak Found	High	0.0008709	0.01652	1.24	10.44	Used	Used	K.QMSDAGIK.Y	[57-64]
	FALSE	High	[K].QMSDAGIKYIPSNTFAYYDQVLDTTAMLGAVPPR.[Y]		3.14703e-08	5.15092e-05	1	1	11	1108923008	1108923008 [57-90]		1	3733.82							255.3	267.5	301	176.2		Not Found	Not Found	Not Found	Not Found	Not Found	Not Found	High	High	High	High	High	7.602e-06	8.423e-11	2.37	86.48	Used	Used	K.QMSDAGIKYIPSNTFAYYDQVLDTTAMLGAVPPR.Y	[57-90]
	FALSE	High	[R].RATNVSARLDAQQK.[K]		0.0131212	0.000333165	1	1	2	1108923008	1108923008 [421-434]		2	1557.85						176.8	201.4	508	8.2	105.6		Not Found	Not Found	Not Found	Not Found	Not Found	Peak Found	Peak Found	High	Peak Found	High	High	6.62e-05	0.0004248	3.11	10.45	Used	Used	R.RATNVSARLDAQQK.K	[421-434]
	FALSE	High	[R].SDEKLLSVFR.[E]		0.000266948	5.15092e-05	2	2	23	1108923008; 731348458	1108923008 [684-693]; 731348458 [727-736]		1	1193.65	5.9	39.7	33.9	10.4	14.6	112.4	144.1	148.6	109.3	381.1	Shared	High	High	Peak Found	High	High	Peak Found	High	High	High	High	High	7.602e-06	4.361e-06	1.67	27.79	Used	Used	R.SDEKLLSVFR.E	[684-693]
	FALSE	High	[R].SDEKLLSVFREGVK.[Y]		4.77384e-08	5.15092e-05	2	2	5	1108923008; 731348458	1108923008 [684-697]; 731348458 [727-740]		2	1606.88				22.1	39.5	40.4	239.3	251.3	200.8	206.7	Shared	Not Found	Not Found	Not Found	Peak Found	Peak Found	Peak Found	High	Peak Found	High	High	High	7.602e-06	1.397e-10	3.2	28.83	Used	Used	R.SDEKLLSVFREGVK.Y	[684-697]
	FALSE	High	[K].SEHGFYLK.[W]		0.0015934	5.15092e-05	1	1	7	1108923008	1108923008 [627-634]		0	980.484	19	216.7	1.5	162	600		0.8					High	High	Peak Found	High	High	Not Found	Peak Found	Not Found	Not Found	Not Found	High	7.602e-06	3.699e-05	1.96	106.98	Used	Used	K.SEHGFYLK.W	[627-634]
	FALSE	High	[K].SFNLLSLLPK.[I]		0.000186989	5.15092e-05	1	1	44	1108923008	1108923008 [183-192]		0	1131.68	387.4	142.4	106	165.3	97.3	79.3	3.5	2.1	7.4	9.2		High	High	High	High	High	High	High	High	High	High	High	7.602e-06	2.841e-06	1.66	113.86	Used	Used	K.SFNLLSLLPK.I	[183-192]
	FALSE	High	[K].SFNLLSLLPKILAIYKEVVTELK.[A]		4.38954e-09	5.15092e-05	1	1	6	1108923008	1108923008 [183-205]		2	2631.57						183.5			711.5	105		High	High	High	Not Found	Not Found	Peak Found	High	Not Found	High	Peak Found	High	7.602e-06	7.937e-12	3.69	114.2	Used	Used	K.SFNLLSLLPKILAIYKEVVTELK.A	[183-205]
	FALSE	High	[R].SSIWKQMSDAGIK.[Y]		0.00588082	0.000145442	1	1	2	1108923008	1108923008 [52-64]		1	1450.74											No Quan Values	Not Found	Not Found	Not Found	Not Found	Not Found	Not Found	Not Found	High	High	Not Found	High	3.22e-05	0.0001698	1.72		Not Used	Not Used	R.SSIWKQMSDAGIK.Y	[52-64]
	FALSE	High	[K].SWLAFAAQK.[VI]		0.000148978	5.15092e-05	2	2	15	1108923008; 731348458	1108923008 [358-366]; 731348458 [401-409]		0	1021.55	290	194.1	48.3	156.1	267.6	10.3	1.4	2.4	8	21.7	Shared	High	High	High	High	High	Peak Found	Peak Found	Peak Found	High	High	High	7.602e-06	2.176e-06	3.09	107.46	Used	Used	K.SWLAFAAQK.V	[358-366]
	FALSE	High	[K].TRKYGEVQPALLNMVAAAK.[Q]		4.1677e-07	5.15092e-05	1	1	5	1108923008	1108923008 [746-764]		2	2060.13		4.3			22.4	70.6	284.9	220.6	182.3	214.9		Not Found	Peak Found	Not Found	Not Found	Peak Found	High	High	High	High	High	High	7.602e-06	1.884e-09	4.46	31.92	Used	Used	K.TRKYGEVQPALLNMVAAAK.Q	[746-764]
	FALSE	High	[R].VNNEAVQKAAAGLK.[G]		9.14796e-10	5.15092e-05	1	1	11	1108923008	1108923008 [402-415]		1	1412.79	4.6	14.6	24.3	5.2	3.5	191	212.6	314.8	79.5	149.8		Peak Found	Peak Found	Peak Found	Peak Found	Peak Found	High	High	High	High	High	High	7.602e-06	1.216e-12	4.31	13.12	Used	Used	R.VNNEAVQKAAAGLK.G	[402-415]
	FALSE	High	[R].VNNEAVQKAAAGLK.[G]	1xGG [K8]	1.15901e-06	5.15092e-05	1	1	7	1108923008	1108923008 [402-415]		1	1526.83	36.8			74.9		28.1	274.5	150.9	269.1	165.7		Peak Found	Not Found	Not Found	High	Not Found	Peak Found	High	High	High	High	High	7.602e-06	6.413e-09	3.23	12.33	Used	Used	R.VNNEAVQKAAAGLK.G	[402-415]
	FALSE	High	[R].VNNEAVQKAAAGLKGSDHR.[R]		8.67036e-11	5.15092e-05	1	1	8	1108923008	1108923008 [402-420]		2	1965.03						103.9	237.9	511.3	35	111.9		Not Found	Not Found	Not Found	Not Found	Not Found	High	High	High	Peak Found	High	High	7.602e-06	7.142e-14	5.42	11.88	Used	Used	R.VNNEAVQKAAAGLKGSDHR.R	[402-420]
	FALSE	High	[K].VVEVNALAK.[A]		0.000364155	5.15092e-05	1	1	35	1108923008	1108923008 [367-375]		0	942.562	105.6	13.8	335.3	212.5	37.7	43.9	43	58.9	74	75.3		High	High	High	High	High	High	High	Peak Found	High	High	High	7.602e-06	6.357e-06	1.32	11.64	Used	Used	K.VVEVNALAK.A	[367-375]
	FALSE	High	[K].WAVHSFR.[I]		0.0064365	0.000145442	1	1	78	1108923008	1108923008 [635-641]		0	902.463	58.8	255	93.4	165.1	267.6	44	32.2	26.9	35.9	21.1		High	High	High	High	High	High	High	High	High	High	High	3.22e-05	0.0001872	2.08	96.11	Used	Used	K.WAVHSFR.I	[635-641]
	FALSE	High	[K].WFDTNYHYIVPELGPDVK.[F]		7.92617e-09	5.15092e-05	1	1	131	1108923008	1108923008 [121-138]		0	2193.07	166.1	174.8	124.5	116.8	183	53.4	52.2	19.9	66.6	42.6		High	High	High	High	High	High	High	High	High	High	High	7.602e-06	1.612e-11	3.72	110.97	Used	Used	K.WFDTNYHYIVPELGPDVK.F	[121-138]
	FALSE	High	[K].WFDTNYHYIVPELGPDVKFSYASHK.[A]		0.000141284	5.15092e-05	1	1	1	1108923008	1108923008 [121-145]		1	3013.45							1000					Not Found	Not Found	Not Found	Not Found	Not Found	Not Found	High	Not Found	Not Found	Not Found	High	7.602e-06	2.034e-06	2.35	52.12	Used	Used	K.WFDTNYHYIVPELGPDVKFSYASHK.A	[121-145]
	FALSE	High	[K].YGAGIGPGVYDIHSPR.[I]		1.4287e-11	5.15092e-05	2	2	150	1108923008; 731348458	1108923008 [698-713]; 731348458 [741-756]		0	1658.83	84.4	96.4	75.6	76.5	346	74.4	50.3	27.9	66.3	102.2	Shared	High	High	High	High	High	High	High	High	High	High	High	7.602e-06	9.46e-15	4.82	105.89	Used	Used	K.YGAGIGPGVYDIHSPR.I	[698-713]
	FALSE	High	[K].YGAGIGPGVYDIHSPRIPPTEEIADRIR.[K]		1.92548e-06	5.15092e-05	1	1	4	1108923008	1108923008 [698-725]		2	3049.59						39.6	590	25.1	265.8	79.5		Not Found	Not Found	Not Found	Not Found	Not Found	Peak Found	High	Peak Found	High	Peak Found	High	7.602e-06	1.182e-08	2.17	37.14	Used	Used	K.YGAGIGPGVYDIHSPRIPPTEEIADRIR.K	[698-725]
	FALSE	High	[K].YGEVQPALLNMVAAAK.[Q]		1.31756e-07	5.15092e-05	1	1	31	1108923008	1108923008 [749-764]		0	1674.89	59.6	75.5	14.6	47.4	73.7	38.4	212.8	191.4	140.8	145.9		High	High	High	High	High	High	High	High	High	High	High	7.602e-06	4.72e-10	4.52	52.38	Used	Used	K.YGEVQPALLNMVAAAK.Q	[749-764]
	FALSE	High	[K].YLFAGVVDGR.[N]		2.07822e-05	5.15092e-05	2	2	76	1108923008; 731348458	1108923008 [296-305]; 731348458 [339-348]		0	1096.58	209.6	157.5	135.4	174.7	93.3	85	22.2	35.3	44	43.1	Shared	High	High	High	High	High	High	High	High	High	High	High	7.602e-06	2.05e-07	1.82	34.96	Used	Used	K.YLFAGVVDGR.N	[296-305]
	FALSE	High	[K].YIPSNTFAYYDQVLDTTAMLGAVPPR.[Y]		1.27673e-09	5.15092e-05	1	1	127	1108923008	1108923008 [65-90]		0	2903.43	137.7	122.9	140.7	137.1	89	123	65.3	45.9	63.8	74.4		High	High	High	High	High	High	High	High	High	High	High	7.602e-06	1.814e-12	2.61	100	Used	Used	K.YIPSNTFAYYDQVLDTTAMLGAVPPR.Y	[65-90]
	FALSE	High	[K].YIPSNTFAYYDQVLDTTAMLGAVPPR.[Y]	1xOxidation [M19]	0.00132887	5.15092e-05	1	1	5	1108923008	1108923008 [65-90]		0	2919.42	234.1	164.9	204.9	199.1		124.4	35.1	30.2	7.3			Peak Found	High	High	High	High	Peak Found	Peak Found	Peak Found	Peak Found	Not Found	High	7.602e-06	2.968e-05	1.43	96.87	Used	Used	K.YIPSNTFAYYDQVLDTTAMLGAVPPR.Y	[65-90]
FALSE		High	Master Protein	-8098168038898184154	211	731345323	PREDICTED: fructose-bisphosphate aldolase, cytoplasmic isozyme [Beta vulgaris subsp. vulgaris]	MTAYRGKYADELIANAAYIATPGKGILAADESTGTIGKRFASINVENVEDNRRALRELLFTTPGALQYLSGVILFEETLYQKTAAGKLFVDVMKEGGVLPGIKVDKGTIELAGTNGETTTQGLDNLGKRCAEYYAAGARFAKWRAVLKIGPNEPSPLAILENANGLARYAIICQENGLVPIVEPEILVDGSHDIDRCAEVSERVLAACYKSLNDHHVLLEGTLLKPNMVTPGSDSKKVANDVIAEYTVRTLQRTVPPAVPGIMFLSGGQSEEEATLNLNAMNKLQAKKPWTLSFSYGRALQQSTLKAWSGKEENVSKAQEVFLARAKANSEATLGKYQGGAAGADASESLHVKDYKY	>gi|731345323|ref|XP_010683863.1| PREDICTED: fructose-bisphosphate aldolase, cytoplasmic isozyme [Beta vulgaris subsp. vulgaris]	0	1315.73	97	58	3670	54	54	357	38.5	6.58	9341.34	97	3670	58	5	72	72.8	98	125.5	79	121.7	88.3	117.9	108.7	116.2	2.18631e+09	1.81794e+09	1.75519e+09	2.89519e+09	3.15743e+09	1.63678e+09	2.6349e+09	3.85909e+09	4.16374e+09	7.61727e+09	4.7191e+09	4.77067e+09	6.42302e+09	8.22627e+09	5.17705e+09
	Checked	Confidence	Annotated Sequence	Modifications	Qvality PEP	Qvality q-value	# Protein Groups	# Proteins	# PSMs	Master Protein Accessions	Positions in Master Proteins	Modifications in Master Proteins	# Missed Cleavages	Theo. MH+ [Da]	Abundances (Scaled): F1: Control	Abundances (Scaled): F2: Control	Abundances (Scaled): F3: Control	Abundances (Scaled): F4: Control	Abundances (Scaled): F5: Control	Abundances (Scaled): F6: Sample	Abundances (Scaled): F7: Sample	Abundances (Scaled): F8: Sample	Abundances (Scaled): F9: Sample	Abundances (Scaled): F10: Sample	Quan Info	Found in Sample: [S1] F1: Control	Found in Sample: [S2] F2: Control	Found in Sample: [S3] F3: Control	Found in Sample: [S4] F4: Control	Found in Sample: [S5] F5: Control	Found in Sample: [S6] F6: Sample	Found in Sample: [S7] F7: Sample	Found in Sample: [S8] F8: Sample	Found in Sample: [S9] F9: Sample	Found in Sample: [S10] F10: Sample	Confidence (by Search Engine): Sequest HT	Percolator q-Value (by Search Engine): Sequest HT	Percolator PEP (by Search Engine): Sequest HT	XCorr (by Search Engine): Sequest HT	Top Apex RT [min]	Quan Usage	Quan Ratio Usage	Sequence in Protein	Positions in Proteins
	FALSE	High	[R].AKANSEATLGKYQGGAAGADASESLHVK.[D]		1.92877e-16	5.15092e-05	1	1	12	731345323	731345323 [326-353]		2	2731.36	0.1					244.3	139.4	173.9	119	323.2		Peak Found	Not Found	Not Found	Not Found	Not Found	High	High	High	High	High	High	7.602e-06	3.53e-20	5.97	9.07	Used	Used	R.AKANSEATLGKYQGGAAGADASESLHVK.D	[326-353]
	FALSE	High	[R].AKANSEATLGKYQGGAAGADASESLHVK.[D]	1xGG [K11]	4.07405e-07	5.15092e-05	1	1	2	731345323	731345323 [326-353]		2	2845.41								287.6	433.7	278.7		Not Found	Not Found	Not Found	Not Found	Not Found	Not Found	Not Found	Peak Found	High	High	High	7.602e-06	1.82e-09	3.29	9.59	Used	Used	R.AKANSEATLGKYQGGAAGADASESLHVK.D	[326-353]
	FALSE	High	[R].ALQQSTLK.[AT]		0.0114696	0.000239412	2	2	26	731345323; 731330405	731345323 [299-306]; 731330405 [299-306]		0	888.515	186.2	118.5	104.7	132.7	298.7	75.2	18	19.1	12.8	34.1	Shared	High	High	Peak Found	High	High	High	Peak Found	Peak Found	Peak Found	High	High	5.511e-05	0.0003614	1.71	10.26	Used	Used	R.ALQQSTLK.A	[299-306]
	FALSE	High	[R].ALQQSTLKAWSGKEENVSK.[A]		2.58132e-10	5.15092e-05	1	1	32	731345323	731345323 [299-317]		2	2104.1	11.2	14.7	6.4	10.2	63.9	186.5	199.9	153.2	146	208		Peak Found	High	Peak Found	Peak Found	High	High	High	High	High	High	High	7.602e-06	2.658e-13	5.82	9.84	Used	Used	R.ALQQSTLKAWSGKEENVSK.A	[299-317]
	FALSE	High	[R].ALQQSTLKAWSGKEENVSK.[A]	1xGG [K/S/T]	1.68982e-09	5.15092e-05	1	1	23	731345323	731345323 [299-317]		2	2218.15	6.8	1.7	16.6	2	3	10.1	240.8	128.1	432.1	158.9		Peak Found	Peak Found	High	Peak Found	High	Peak Found	High	High	High	High	High	7.602e-06	2.528e-12	5.98	9.57	Used	Used	R.ALQQSTLKAWSGKEENVSK.A	[299-317]
	FALSE	High	[R].ALRELLFTTPGALQYLSGVILFEETLYQK.[T]		2.42666e-12	5.15092e-05	1	1	73	731345323	731345323 [54-82]		1	3313.81	62.2	63.9	24	48.9	2.5	158.4	150.3	221.2	179.8	88.7		Peak Found	High	High	High	Peak Found	High	High	High	High	High	High	7.602e-06	1.306e-15	4.42	108.2	Used	Used	R.ALRELLFTTPGALQYLSGVILFEETLYQK.T	[54-82]
	FALSE	High	[R].ALRELLFTTPGALQYLSGVILFEETLYQKTAAGK.[L]		1.20936e-11	5.15092e-05	1	1	7	731345323	731345323 [54-87]		2	3742.05		15.4		48.1		196.6	189.8	313.4	144.1	92.6		Not Found	Peak Found	Not Found	Peak Found	Not Found	Peak Found	High	High	Peak Found	High	High	7.602e-06	7.826e-15	7.61	108.62	Used	Used	R.ALRELLFTTPGALQYLSGVILFEETLYQKTAAGK.L	[54-87]
	FALSE	High	[K].ANSEATLGKYQGGAAGADASESLHVK.[D]		3.46868e-10	5.15092e-05	1	1	13	731345323	731345323 [328-353]		1	2532.23	2.5	8.8	78.3	8.4		301.8	145.3	131.8	174.4	148.8		Peak Found	Peak Found	Peak Found	High	Not Found	High	High	High	High	High	High	7.602e-06	3.802e-13	3.55	9.77	Used	Used	K.ANSEATLGKYQGGAAGADASESLHVK.D	[328-353]
	FALSE	High	[K].ANSEATLGKYQGGAAGADASESLHVK.[D]	1xGG [K/S/T]	1.75712e-07	5.15092e-05	1	1	6	731345323	731345323 [328-353]		1	2646.28	86.6	6	94.7	35.4	132.2	100	6.3	45.3	293.5	200		Peak Found	Peak Found	Peak Found	Peak Found	High	Peak Found	Peak Found	Peak Found	High	High	High	7.602e-06	6.654e-10	2.79	10.77	Used	Used	K.ANSEATLGKYQGGAAGADASESLHVK.D	[328-353]
	FALSE	High	[K].AQEVFLAR.[AC]		0.0013801	5.15092e-05	2	2	111	731345323; 731330405	731345323 [318-325]; 731330405 [318-325]		0	933.515	38	27.8	102.6	144.9	24.2	147.6	113	119.2	157.4	125.4	Shared	High	High	High	High	High	High	High	High	High	High	High	7.602e-06	3.101e-05	2.1	18.24	Used	Used	K.AQEVFLAR.A	[318-325]
	FALSE	High	[R].AVLKIGPNEPSPLAILENANGLAR.[Y]		1.86144e-12	5.15092e-05	1	1	26	731345323	731345323 [145-168]		1	2457.38	32.7	104.2	68.8		68.9	183.8	128.3	155.6	98	159.5		Peak Found	Peak Found	High	Not Found	High	High	High	High	High	High	High	7.602e-06	9.709e-16	6.51	68.25	Used	Used	R.AVLKIGPNEPSPLAILENANGLAR.Y	[145-168]
	FALSE	High	[K].AWSGKEENVSK.[A]		1.98473e-06	5.15092e-05	1	1	49	731345323	731345323 [307-317]		1	1234.61	158.9	251	170.5	296.1		56.2	11.7	19.5	25	11.1		High	High	High	High	Not Found	Peak Found	Peak Found	Peak Found	Peak Found	High	High	7.602e-06	1.216e-08	2.73	87.56	Used	Used	K.AWSGKEENVSK.A	[307-317]
	FALSE	High	[K].AWSGKEENVSK.[A]	1xGG [K/S]	0.00177134	5.15092e-05	1	1	2	731345323	731345323 [307-317]		1	1348.65			321.7	223.7		167.2	98.2		90.2	99		Not Found	Not Found	High	High	Not Found	Peak Found	Peak Found	Not Found	Peak Found	Peak Found	High	7.602e-06	4.194e-05	2.3	9.9	Used	Used	K.AWSGKEENVSK.A	[307-317]
	FALSE	High	[K].AWSGKEENVSKAQEVFLAR.[A]		7.05396e-14	5.15092e-05	1	1	105	731345323	731345323 [307-325]		2	2149.1		3.9	7	1.2		219.1	202.4	229.8	192.2	144.4		Not Found	Peak Found	Peak Found	Peak Found	Not Found	High	High	High	High	High	High	7.602e-06	2.528e-17	5.54	24.25	Used	Used	K.AWSGKEENVSKAQEVFLAR.A	[307-325]
	FALSE	High	[K].AWSGKEENVSKAQEVFLAR.[A]	1xGG [K/S]	9.16942e-06	5.15092e-05	1	1	18	731345323	731345323 [307-325]		2	2263.15							173.1	29.6	653.1	144.3		Not Found	Not Found	Not Found	Not Found	Not Found	Not Found	High	High	High	High	High	7.602e-06	7.676e-08	2.77	21.58	Used	Used	K.AWSGKEENVSKAQEVFLAR.A	[307-325]
	FALSE	High	[R].CAEVSERVLAACYK.[S]	2xCarbamidomethyl [C1; C12]	3.5319e-05	5.15092e-05	1	1	2	731345323	731345323 [197-210]		1	1655.79						70.3	271.3	263.7	90.3	304.3		Not Found	Not Found	Not Found	Not Found	Not Found	Peak Found	Peak Found	High	Peak Found	High	High	7.602e-06	3.857e-07	3.79	18.74	Used	Used	R.CAEVSERVLAACYK.S	[197-210]
	FALSE	High	[R].CAEYYAAGAR.[F]	1xCarbamidomethyl [C1]	7.94011e-06	5.15092e-05	1	1	57	731345323	731345323 [130-139]		0	1131.49	107.2	50.8	237.7	136.5	32.3	108.9	74.9	104.1	101.5	46		High	High	High	High	High	High	High	High	High	High	High	7.602e-06	6.474e-08	2.59	10.33	Used	Used	R.CAEYYAAGAR.F	[130-139]
	FALSE	High	[K].EENVSKAQEVFLAR.[A]		0.156535	0.00520856	1	1	1	731345323	731345323 [312-325]		1	1619.84							417.1			582.9		Not Found	Not Found	Not Found	Not Found	Not Found	Not Found	High	Not Found	Not Found	Peak Found	High	0.000759	0.01438	0.98	11.65	Used	Used	K.EENVSKAQEVFLAR.A	[312-325]
	FALSE	High	[K].EGGVLPGIK.[V]		0.000143441	5.15092e-05	1	1	53	731345323	731345323 [95-103]		0	869.509	92.7	46.4	357.5	229	48.2	28.9	14.9	31.4	60.2	90.8		High	High	High	High	High	Peak Found	Peak Found	High	High	High	High	7.602e-06	2.075e-06	1.9	16.82	Used	Used	K.EGGVLPGIK.V	[95-103]
	FALSE	High	[K].EGGVLPGIKVDK.[G]		0.00121354	5.15092e-05	1	1	16	731345323	731345323 [95-106]		1	1211.7	132.5	153.1	49.4	212.8	241.6	22.8	28.9	42.1	70	46.7		High	High	High	High	High	Peak Found	Peak Found	High	High	High	High	7.602e-06	2.679e-05	2.47	104.31	Used	Used	K.EGGVLPGIKVDK.G	[95-106]
	FALSE	High	[R].ELLFTTPGALQYLSGVILFEETLYQK.[T]		1.62605e-10	5.15092e-05	1	1	62	731345323	731345323 [57-82]		0	2973.59	114.4	128	298.7	213.6	50.4	7.6	26.8	43.1	97.3	20		High	High	High	High	High	High	High	High	High	High	High	7.602e-06	1.528e-13	4.57	109.35	Used	Used	R.ELLFTTPGALQYLSGVILFEETLYQK.T	[57-82]
	FALSE	High	[R].ELLFTTPGALQYLSGVILFEETLYQKTAAGK.[L]		6.14033e-05	5.15092e-05	1	1	1	731345323	731345323 [57-87]		1	3401.82											No Quan Values	Not Found	High	Not Found	Not Found	Not Found	Not Found	Not Found	Not Found	Not Found	Not Found	High	7.602e-06	7.483e-07	3.38		Not Used	Not Used	R.ELLFTTPGALQYLSGVILFEETLYQKTAAGK.L	[57-87]
	FALSE	High	[R].ELLFTTPGALQYLSGVILFEETLYQKTAAGKLFVDVMK.[E]		4.42552e-08	5.15092e-05	1	1	2	731345323	731345323 [57-94]		2	4234.28											No Quan Values	Not Found	Not Found	High	High	Not Found	Not Found	Not Found	Not Found	Not Found	Not Found	High	7.602e-06	1.272e-10	6.34		Not Used	Not Used	R.ELLFTTPGALQYLSGVILFEETLYQKTAAGKLFVDVMK.E	[57-94]
	FALSE	High	[R].FASINVENVEDNR.[R]		6.71717e-07	5.15092e-05	1	1	13	731345323	731345323 [40-52]		0	1506.72	2.3	9.7	77.5	104.5	14.3	77	144.7	127.1	151.3	291.6		Peak Found	High	High	High	High	High	Peak Found	High	High	High	High	7.602e-06	3.326e-09	2.61	27.98	Used	Used	R.FASINVENVEDNR.R	[40-52]
	FALSE	High	[R].FASINVENVEDNRR.[A]		2.12229e-08	5.15092e-05	1	1	173	731345323	731345323 [40-53]		1	1662.82	42.4	55.4	62.5	121.8	97	127	80.6	142.5	114.8	155.9		High	High	High	High	High	High	High	High	High	High	High	7.602e-06	5.251e-11	3.88	19.97	Used	Used	R.FASINVENVEDNRR.A	[40-53]
	FALSE	High	[R].FASINVENVEDNRRALR.[E]		5.04252e-05	5.15092e-05	1	1	3	731345323	731345323 [40-56]		2	2003.04						13.6	236.9	510.9	40.5	198.1		Not Found	Not Found	Not Found	Not Found	Not Found	Peak Found	High	High	Peak Found	High	High	7.602e-06	5.94e-07	3.09	20.66	Used	Used	R.FASINVENVEDNRRALR.E	[40-56]
	FALSE	High	[R].GKYADELIANAAYIATPGK.[G]		1.37398e-13	5.15092e-05	1	1	238	731345323	731345323 [6-24]		1	1966.03	83.2	83.5	110.8	179.4	111.7	114.2	59.4	71.4	94.7	91.6		High	High	High	High	High	High	High	High	High	High	High	7.602e-06	5.308e-17	4.93	44.47	Used	Used	R.GKYADELIANAAYIATPGK.G	[6-24]
	FALSE	High	[R].GKYADELIANAAYIATPGKGILAADESTGTIGK.[R]		7.79323e-12	5.15092e-05	1	1	8	731345323	731345323 [6-38]		2	3279.71						48.8	207.2	410.5	154.8	178.7		Not Found	Not Found	Not Found	Not Found	Not Found	Peak Found	High	High	High	High	High	7.602e-06	4.824e-15	5.65	59.8	Used	Used	R.GKYADELIANAAYIATPGKGILAADESTGTIGK.R	[6-38]
	FALSE	High	[K].GILAADESTGTIGK.[R]		2.72511e-08	5.15092e-05	2	2	55	731345323; 731330405	731345323 [25-38]; 731330405 [25-38]		0	1332.7	55	17	257.5	303.1	77.3	44.4	35.8	58.8	80.2	71	Shared	High	High	High	High	High	High	High	High	High	High	High	7.602e-06	7.129e-11	2.54	20.06	Used	Used	K.GILAADESTGTIGK.R	[25-38]
	FALSE	High	[K].GILAADESTGTIGKR.[F]		5.38273e-10	5.15092e-05	2	2	183	731345323; 731330405	731345323 [25-39]; 731330405 [25-39]		1	1488.8	42.6	42.4	80.7	85.6	102.1	160.2	102.6	104.5	143.9	135.3	Shared	High	High	High	High	High	High	High	High	High	High	High	7.602e-06	6.427e-13	3.68	14.51	Used	Used	K.GILAADESTGTIGKR.F	[25-39]
	FALSE	High	[K].GILAADESTGTIGKR.[F]	1xGG [K14]	5.76594e-09	5.15092e-05	2	2	19	731345323; 731330405	731345323 [25-39]; 731330405 [25-39]		1	1602.84	9.1	0.6	14.6	3		3.1	258.8	138.7	408	164	Shared	High	Peak Found	High	Peak Found	Not Found	Peak Found	High	High	High	High	High	7.602e-06	1.1e-11	2.72	10.29	Used	Used	K.GILAADESTGTIGKR.F	[25-39]
	FALSE	High	[K].GTIELAGTNGETTTQGLDNLGK.[R]		0.000632933	5.15092e-05	1	1	2	731345323	731345323 [107-128]		0	2190.09			22	805.8		46.8		41.8	20.3	63.4		Not Found	Not Found	Peak Found	High	Not Found	Peak Found	Not Found	Peak Found	Peak Found	Peak Found	High	7.602e-06	1.229e-05	1.55	30.48	Used	Used	K.GTIELAGTNGETTTQGLDNLGK.R	[107-128]
	FALSE	High	[K].GTIELAGTNGETTTQGLDNLGKR.[C]		1.89097e-11	5.15092e-05	1	1	15	731345323	731345323 [107-129]		1	2346.19	95.9	86.6	65.6	175.3	58.9	55.7	74.8	139	74.6	173.7		High	High	High	High	High	High	High	High	High	High	High	7.602e-06	1.286e-14	4.5	25.65	Used	Used	K.GTIELAGTNGETTTQGLDNLGKR.C	[107-129]
	FALSE	High	[K].KPWTLSFSYGR.[A]		1.1323e-07	5.15092e-05	1	1	510	731345323	731345323 [288-298]		0	1341.69	99	75.1	78.4	141.6	83.8	127.2	75.5	87.4	128.2	103.8		High	High	High	High	High	High	High	High	High	High	High	7.602e-06	3.924e-10	3.3	106.81	Used	Used	K.KPWTLSFSYGR.A	[288-298]
	FALSE	High	[K].KPWTLSFSYGR.[A]	1xPhospho [R/S/T/Y]	0.0970081	0.00268019	1	1	5	731345323	731345323 [288-298]	731345323 1xPhospho [S/T]	0	1421.66				32.6	16.2	19.3	497.3	221.3	145.1	68.2		Not Found	Not Found	Not Found	Peak Found	Peak Found	Peak Found	High	High	High	Peak Found	High	0.0003889	0.006204	1.58	33	Used	Used	K.KPWTLSFSYGR.A	[288-298]
	FALSE	High	[K].KVANDVIAEYTVR.[T]		2.98272e-09	5.15092e-05	1	1	241	731345323	731345323 [237-249]		1	1477.8	48.4	61.9	36.6	76.1	78.5	114.3	103	186.1	91.2	203.9		High	High	High	High	High	High	High	High	High	High	High	7.602e-06	4.985e-12	3.42	22.12	Used	Used	K.KVANDVIAEYTVR.T	[237-249]
	FALSE	High	[K].KVANDVIAEYTVR.[T]	1xGG [K1]	0.163696	0.00539459	1	1	1	731345323	731345323 [237-249]		1	1591.84	71.7						44.1	17.3	98.5	768.4		Peak Found	Not Found	Not Found	Not Found	Not Found	Not Found	Peak Found	Peak Found	Peak Found	High	High	0.0008076	0.0155	1.97	23.6	Used	Used	K.KVANDVIAEYTVR.T	[237-249]
	FALSE	High	[K].LFVDVMK.[E]		7.94429e-05	5.15092e-05	1	1	70	731345323	731345323 [88-94]		0	851.47	152.8	121.7	195.9	192.3	67.5	30.8	24.6	44.8	73.3	96.2		High	High	High	High	High	High	High	High	High	High	High	7.602e-06	1.022e-06	2.57	29.79	Used	Used	K.LFVDVMK.E	[88-94]
	FALSE	High	[K].LFVDVMK.[E]	1xOxidation [M6]	0.0150068	0.000377453	1	1	17	731345323	731345323 [88-94]		0	867.464	120.8	121.3	233.4	396.2	28.4	49.4	16.5		22.4	11.6		High	High	High	High	High	High	Peak Found	Not Found	Peak Found	High	High	7.112e-05	0.0004947	0.94	17.21	Used	Used	K.LFVDVMK.E	[88-94]
	FALSE	High	[K].LFVDVMKEGGVLPGIK.[V]		5.76256e-10	5.15092e-05	1	1	28	731345323	731345323 [88-103]		1	1701.96	141.8	203.8	32.9	130.1	49.6	36.4	59.2	120	127.1	99.2		High	High	High	High	High	High	High	High	High	High	High	7.602e-06	6.99e-13	4.11	50.27	Used	Used	K.LFVDVMKEGGVLPGIK.V	[88-103]
	FALSE	High	[K].LFVDVMKEGGVLPGIK.[V]	1xOxidation [M6]	0.00334133	0.000100671	1	1	2	731345323	731345323 [88-103]		1	1717.96	96.1	10.1	293.8	16.6	17.1	235.8		228.2	29.8	72.6		Peak Found	Peak Found	Peak Found	Peak Found	Peak Found	Peak Found	Not Found	High	Peak Found	High	High	1.369e-05	8.831e-05	2	93.85	Used	Used	K.LFVDVMKEGGVLPGIK.V	[88-103]
	FALSE	High	[K].LFVDVMKEGGVLPGIKVDK.[G]		0.00017204	5.15092e-05	1	1	4	731345323	731345323 [88-106]		2	2044.15	52.4		139.2				129.7	89.9	102.5	486.3		Peak Found	Not Found	Peak Found	Not Found	Not Found	Not Found	High	High	Peak Found	High	High	7.602e-06	2.575e-06	2.85	47.91	Used	Used	K.LFVDVMKEGGVLPGIKVDK.G	[88-106]
	FALSE	High	[K].IGPNEPSPLAILENANGLAR.[Y]		1.57566e-12	5.15092e-05	1	1	87	731345323	731345323 [149-168]		0	2046.1	93.2	20.4	180.8	204.4	102.8	64.7	64.7	93.6	72.1	103.2		High	High	High	High	High	High	High	High	High	High	High	7.602e-06	8.059e-16	4.54	108.15	Used	Used	K.IGPNEPSPLAILENANGLAR.Y	[149-168]
	FALSE	High	[K].LQAKKPWTLSFSYGR.[A]		1.11658e-05	5.15092e-05	1	1	18	731345323	731345323 [284-298]		1	1781.97	19.6	145.2	6.5	26.7		28.3	390.6	134.8	123.8	124.5		Peak Found	High	Peak Found	Peak Found	Not Found	High	High	High	High	High	High	7.602e-06	9.663e-08	3.49	19.31	Used	Used	K.LQAKKPWTLSFSYGR.A	[284-298]
	FALSE	High	[-].MTAYRGKYADELIANAAYIATPGK.[G]	1xMet-loss+Acetyl [N-Term]	4.32607e-08	5.15092e-05	1	1	4	731345323	731345323 [1-24]	731345323 1xMet-loss+Acetyl [N-Term]	2	2499.29						144.5	11.7	552.4		291.4		Not Found	Not Found	Not Found	Not Found	Not Found	High	Peak Found	High	Not Found	High	High	7.602e-06	1.241e-10	5.27	53.27	Used	Used	-.MTAYRGKYADELIANAAYIATPGK.G	[1-24]
	FALSE	High	[K].RCAEYYAAGAR.[F]	1xCarbamidomethyl [C2]	0.099019	0.00275956	1	1	3	731345323	731345323 [129-139]		1	1287.59		629.3		362						8.7		Not Found	High	Not Found	High	Not Found	Not Found	Not Found	Not Found	Not Found	Peak Found	High	0.0004027	0.006483	2.23	78.09	Used	Used	K.RCAEYYAAGAR.F	[129-139]
	FALSE	High	[K].RFASINVENVEDNRR.[A]		6.18007e-07	5.15092e-05	1	1	9	731345323	731345323 [39-53]		2	1818.92	153.5		21	110.1		31.8	176.9	223.6	160.6	122.5		High	Not Found	Peak Found	High	Not Found	Peak Found	High	High	Peak Found	High	High	7.602e-06	3.001e-09	3.27	15.92	Used	Used	K.RFASINVENVEDNRR.A	[39-53]
	FALSE	High	[K].SLNDHHVLLEGTLLKPNMVTPGSDSK.[K]		4.50868e-15	5.15092e-05	1	1	181	731345323	731345323 [211-236]		0	2802.45	125.8	164	94.1	63.5	87.6	170.3	66.5	65.3	90.4	72.5		High	High	High	High	High	High	High	High	High	High	High	7.602e-06	1.181e-18	7.25	103.53	Used	Used	K.SLNDHHVLLEGTLLKPNMVTPGSDSK.K	[211-236]
	FALSE	High	[K].SLNDHHVLLEGTLLKPNMVTPGSDSK.[K]	1xOxidation [M18]	5.03089e-09	5.15092e-05	1	1	26	731345323	731345323 [211-236]		0	2818.44	88.7	11.3	94.7	53.6	5.1	489.9	22.1	60.3	112.3	62.1		Peak Found	High	High	High	Peak Found	High	High	High	High	High	High	7.602e-06	9.361e-12	4.12	89.09	Used	Used	K.SLNDHHVLLEGTLLKPNMVTPGSDSK.K	[211-236]
	FALSE	High	[K].SLNDHHVLLEGTLLKPNMVTPGSDSK.[K]	1xGG [K15]	0.0011082	5.15092e-05	1	1	1	731345323	731345323 [211-236]		0	2916.49									1000			Not Found	Not Found	Not Found	Not Found	Not Found	Not Found	Not Found	Not Found	High	Not Found	High	7.602e-06	2.406e-05	2.13	29.26	Used	Used	K.SLNDHHVLLEGTLLKPNMVTPGSDSK.K	[211-236]
	FALSE	High	[K].SLNDHHVLLEGTLLKPNMVTPGSDSKK.[V]		1.88432e-17	5.15092e-05	1	1	111	731345323	731345323 [211-237]		1	2930.54	146.7	189.8	45.3	38.4	5.6	224.8	106.5	96.8	74	72.1		High	High	High	High	Peak Found	High	High	High	High	High	High	7.602e-06	2.635e-21	7.48	104.19	Used	Used	K.SLNDHHVLLEGTLLKPNMVTPGSDSKK.V	[211-237]
	FALSE	High	[K].SLNDHHVLLEGTLLKPNMVTPGSDSKK.[V]	1xOxidation [M18]	2.76834e-07	5.15092e-05	1	1	10	731345323	731345323 [211-237]		1	2946.54	161.4	291.4	42.7	58.6		209.7	24.1	18	109.3	84.8		High	High	Peak Found	High	Not Found	High	High	Peak Found	High	High	High	7.602e-06	1.145e-09	4.03	103.75	Used	Used	K.SLNDHHVLLEGTLLKPNMVTPGSDSKK.V	[211-237]
	FALSE	High	[K].SLNDHHVLLEGTLLKPNMVTPGSDSKK.[V]	1xGG [K/S]	2.98798e-06	5.15092e-05	1	1	8	731345323	731345323 [211-237]		1	3044.58							213.6	25.4	535.7	225.3		Not Found	Not Found	Not Found	Not Found	Not Found	Not Found	High	Peak Found	High	High	High	7.602e-06	1.992e-08	2.9	18.49	Used	Used	K.SLNDHHVLLEGTLLKPNMVTPGSDSKK.V	[211-237]
	FALSE	High	[K].SLNDHHVLLEGTLLKPNMVTPGSDSKKVANDVIAEYTVR.[T]		2.21708e-11	5.15092e-05	1	1	14	731345323	731345323 [211-249]		2	4261.23	4.7	9.7	42.8	2.5		255	315.1	268.9	58.9	42.3		Peak Found	Peak Found	Peak Found	Peak Found	Not Found	High	High	High	High	High	High	7.602e-06	1.546e-14	4.8	47.43	Used	Used	K.SLNDHHVLLEGTLLKPNMVTPGSDSKKVANDVIAEYTVR.T	[211-249]
	FALSE	High	[K].SLNDHHVLLEGTLLKPNMVTPGSDSKKVANDVIAEYTVR.[T]	1xOxidation [M18]	2.27471e-06	5.15092e-05	1	1	2	731345323	731345323 [211-249]		2	4277.22						456	266.3	131.2		146.6		Not Found	Not Found	Not Found	Not Found	Not Found	High	Peak Found	High	Not Found	Peak Found	High	7.602e-06	1.44e-08	3.8	52.02	Used	Used	K.SLNDHHVLLEGTLLKPNMVTPGSDSKKVANDVIAEYTVR.T	[211-249]
	FALSE	High	[K].TAAGKLFVDVMK.[E]		0.000150111	5.15092e-05	1	1	3	731345323	731345323 [83-94]		1	1279.71	24.7			29.6		266.8	222.7	212.9	177.1	66.2		Peak Found	Not Found	Not Found	Peak Found	Not Found	Peak Found	High	Peak Found	High	High	High	7.602e-06	2.195e-06	2.08	28.4	Used	Used	K.TAAGKLFVDVMK.E	[83-94]
	FALSE	High	[K].TAAGKLFVDVMKEGGVLPGIK.[V]		1.00069e-11	5.15092e-05	1	1	9	731345323	731345323 [83-103]		2	2130.2	49.3	5.9	171.4	66.2			237.3	149.9	163	156.9		Peak Found	Peak Found	Peak Found	Peak Found	Not Found	High	High	High	High	High	High	7.602e-06	6.365e-15	4.37	55.52	Used	Used	K.TAAGKLFVDVMKEGGVLPGIK.V	[83-103]
	FALSE	High	[R].TVPPAVPGIMFLSGGQSEEEATLNLNAMNK.[L]		7.57838e-08	5.15092e-05	1	1	47	731345323	731345323 [254-283]		0	3115.54	64.4	52.5	61.4	92.8	155.1	36	117.3	163.3	138.6	118.4		High	High	High	High	High	Peak Found	High	High	High	High	High	7.602e-06	2.432e-10	3.88	76.83	Used	Used	R.TVPPAVPGIMFLSGGQSEEEATLNLNAMNK.L	[254-283]
	FALSE	High	[R].TVPPAVPGIMFLSGGQSEEEATLNLNAMNK.[L]	1xOxidation [M10]	1.05829e-06	5.15092e-05	1	1	4	731345323	731345323 [254-283]		0	3131.54				27.1		362.4	126.3	102.4	117	264.8		Not Found	Not Found	Not Found	Peak Found	Not Found	Peak Found	High	High	Peak Found	High	High	7.602e-06	5.726e-09	3.4	80.32	Used	Used	R.TVPPAVPGIMFLSGGQSEEEATLNLNAMNK.L	[254-283]
	FALSE	High	[R].TVPPAVPGIMFLSGGQSEEEATLNLNAMNKLQAK.[K]		2.35561e-11	5.15092e-05	1	1	29	731345323	731345323 [254-287]		1	3555.82						159.8	196.9	402.7	124.4	116.2		Not Found	Not Found	Not Found	Not Found	Not Found	High	High	High	High	High	High	7.602e-06	1.65e-14	5.06	70.21	Used	Used	R.TVPPAVPGIMFLSGGQSEEEATLNLNAMNKLQAK.K	[254-287]
	FALSE	High	[R].TVPPAVPGIMFLSGGQSEEEATLNLNAMNKLQAK.[K]	1xOxidation [M10]	7.51235e-10	5.15092e-05	1	1	2	731345323	731345323 [254-287]		1	3571.81							537.4	373.9		88.7		Not Found	Not Found	Not Found	Not Found	Not Found	Not Found	High	High	Not Found	Peak Found	High	7.602e-06	9.561e-13	4.61	69.16	Used	Used	R.TVPPAVPGIMFLSGGQSEEEATLNLNAMNKLQAK.K	[254-287]
	FALSE	High	[R].TVPPAVPGIMFLSGGQSEEEATLNLNAMNKLQAKKPWTLSFSYGR.[A]		0.00673359	0.000145442	1	1	1	731345323	731345323 [254-298]		2	4878.5		315.4				116.6	17.5	290.2	114.2	146		Not Found	Peak Found	Not Found	Not Found	Not Found	Peak Found	Peak Found	High	Peak Found	Peak Found	High	3.22e-05	0.0001975	3.02	100.59	Used	Used	R.TVPPAVPGIMFLSGGQSEEEATLNLNAMNKLQAKKPWTLSFSYGR.A	[254-298]
	FALSE	High	[K].VANDVIAEYTVR.[T]		3.0763e-08	5.15092e-05	1	1	135	731345323	731345323 [238-249]		0	1349.71	31.5	18.5	69	129.1	49	92.3	98.9	245.7	102.1	163.9		High	High	High	High	High	High	High	High	High	High	High	7.602e-06	8.243e-11	2.37	28.17	Used	Used	K.VANDVIAEYTVR.T	[238-249]
	FALSE	High	[K].VDKGTIELAGTNGETTTQGLDNLGK.[R]		2.20422e-08	5.15092e-05	1	1	11	731345323	731345323 [104-128]		1	2532.28	62.9	125.5	66.3	402.2		47.6	29.9	101.1	73.5	91		High	Peak Found	High	High	Not Found	High	High	High	Peak Found	High	High	7.602e-06	5.535e-11	3.41	27.78	Used	Used	K.VDKGTIELAGTNGETTTQGLDNLGK.R	[104-128]
	FALSE	High	[K].VDKGTIELAGTNGETTTQGLDNLGKR.[C]		1.7735e-17	5.15092e-05	1	1	35	731345323	731345323 [104-129]		2	2688.38	112.9	139.1	133.1	134.3	112	32.5	50.6	78.8	60.7	146		High	High	High	High	High	High	High	High	High	High	High	7.602e-06	2.457e-21	7.56	24.43	Used	Used	K.VDKGTIELAGTNGETTTQGLDNLGKR.C	[104-129]
	FALSE	High	[K].VDKGTIELAGTNGETTTQGLDNLGKR.[C]	1xGG [K25]	0.00218891	0.000100671	1	1	1	731345323	731345323 [104-129]		2	2802.42									1000			Not Found	Not Found	Not Found	Not Found	Not Found	Not Found	Not Found	Not Found	High	Not Found	High	1.369e-05	5.376e-05	1.85	16.45	Used	Used	K.VDKGTIELAGTNGETTTQGLDNLGKR.C	[104-129]
	FALSE	High	[R].VLAACYK.[S]	1xCarbamidomethyl [C5]	0.00151123	5.15092e-05	1	1	72	731345323	731345323 [204-210]		0	824.433	75.6	107.1	270	92.8	37.7	75.5	100.4	130.7	70.9	39.3		High	High	High	High	High	High	High	High	High	High	High	7.602e-06	3.457e-05	2.26	10.17	Used	Used	R.VLAACYK.S	[204-210]
	FALSE	High	[K].YADELIANAAYIATPGK.[G]		1.18357e-09	5.15092e-05	1	1	58	731345323	731345323 [8-24]		0	1780.91	51.5	38	57.8	209.5	213.7	36.1	60.7	117.6	87.8	127.3		High	High	High	High	High	High	High	High	High	High	High	7.602e-06	1.656e-12	4.93	45.49	Used	Used	K.YADELIANAAYIATPGK.G	[8-24]
	FALSE	High	[K].YADELIANAAYIATPGKGILAADESTGTIGK.[R]		1.94013e-06	5.15092e-05	1	1	3	731345323	731345323 [8-38]		1	3094.59							246.6	500.1	118	135.3		Not Found	Not Found	Not Found	Not Found	Not Found	Not Found	High	High	Peak Found	High	High	7.602e-06	1.188e-08	3.18	59.52	Used	Used	K.YADELIANAAYIATPGKGILAADESTGTIGK.R	[8-38]
	FALSE	High	[K].YADELIANAAYIATPGKGILAADESTGTIGKR.[F]		1.22566e-14	5.15092e-05	1	1	55	731345323	731345323 [8-39]		2	3250.7	5.1	4.3		6.5		143	272.7	227.1	130.9	210.5		Peak Found	Peak Found	Not Found	Peak Found	Not Found	High	High	High	High	High	High	7.602e-06	3.606e-18	7.84	55.28	Used	Used	K.YADELIANAAYIATPGKGILAADESTGTIGKR.F	[8-39]
	FALSE	High	[R].YAIICQENGLVPIVEPEILVDGSHDIDR.[C]	1xCarbamidomethyl [C5]	1.23644e-12	5.15092e-05	1	1	44	731345323	731345323 [169-196]		0	3164.59	160	150	144	194.9	152.3	51.3	20.1	71.3	24.3	31.9		High	High	High	High	High	High	High	High	High	High	High	7.602e-06	6.171e-16	5.26	109.5	Used	Used	R.YAIICQENGLVPIVEPEILVDGSHDIDR.C	[169-196]
	FALSE	High	[R].YAIICQENGLVPIVEPEILVDGSHDIDRCAEVSER.[V]	2xCarbamidomethyl [C5; C29]	1.54025e-12	5.15092e-05	1	1	41	731345323	731345323 [169-203]		1	3995.95	40.9	46	29.6	32.6	39.7	290.7	218.6	179.3	95.2	27.5		High	High	High	High	High	High	High	High	High	High	High	7.602e-06	7.908e-16	6.11	63.98	Used	Used	R.YAIICQENGLVPIVEPEILVDGSHDIDRCAEVSER.V	[169-203]
	FALSE	High	[R].YAIICQENGLVPIVEPEILVDGSHDIDRCAEVSERVLAACYK.[S]	3xCarbamidomethyl [C5; C29; C40]	2.23525e-10	5.15092e-05	1	1	5	731345323	731345323 [169-210]		2	4801.36							397.1	152.1	66.8	384		Not Found	Not Found	Not Found	Not Found	Not Found	Not Found	High	High	High	High	High	7.602e-06	2.226e-13	7.1	81.6	Used	Used	R.YAIICQENGLVPIVEPEILVDGSHDIDRCAEVSERVLAACYK.S	[169-210]
	FALSE	High	[K].YQGGAAGADASESLHVK.[D]		2.44799e-10	5.15092e-05	1	1	106	731345323	731345323 [337-353]		0	1660.79	124.8	56.2	257.5	267.5	38.3	79.3	24.7	34.1	61	56.6		High	High	High	High	High	High	High	High	High	High	High	7.602e-06	2.494e-13	2.72	10.01	Used	Used	K.YQGGAAGADASESLHVK.D	[337-353]
	FALSE	High	[K].YQGGAAGADASESLHVKDYK.[Y]		3.89071e-08	5.15092e-05	1	1	10	731345323	731345323 [337-356]		1	2066.98	115.4	124.4	82.1	188.6	142.2	203.4	20.3	4.5	50.8	68.5		High	High	High	High	High	Peak Found	Peak Found	Peak Found	High	Peak Found	High	7.602e-06	1.091e-10	3.37	105.37	Used	Used	K.YQGGAAGADASESLHVKDYK.Y	[337-356]
	FALSE	High	[K].YQGGAAGADASESLHVKDYKY.[-]		4.38439e-11	5.15092e-05	1	1	232	731345323	731345323 [337-357]		2	2230.04	42.2	92.9	53.2	106.6	161.2	141.8	84.8	72.2	86.7	158.4		High	High	High	High	High	High	High	High	High	High	High	7.602e-06	3.282e-14	5.14	106.65	Used	Used	K.YQGGAAGADASESLHVKDYKY.-	[337-357]
	FALSE	High	[K].YQGGAAGADASESLHVKDYKY.[-]	1xGG [K]	4.2042e-05	5.15092e-05	1	1	7	731345323	731345323 [337-357]		2	2344.08	1.4	39	5.4	1.2	2.5		161.8	254	222.2	312.4		Peak Found	Peak Found	Peak Found	Peak Found	Peak Found	Not Found	High	High	High	High	High	7.602e-06	4.771e-07	3.41	16.86	Used	Used	K.YQGGAAGADASESLHVKDYKY.-	[337-357]
FALSE		High	Master Protein	7634629388489850378	3347	731345370	PREDICTED: enolase [Beta vulgaris subsp. vulgaris]	MVAIKGIKARQIYDSRGNPTVEADVHLDDGTYARAAVPSGASTGVYEALELRDGGKDYMGKGVSKAVQNVNEIIGPALVGKDPTEQTAIDNFMVQQLDGTVNEWGWCKQKLGANAILAVSLAVCKAGAQVKKIPLYQHIAEIAGNPKMVLPVPAFNVINGGSHAGNKLAMQEFMILPTGASSFKEAMKMGSEVYHNLKSVIKKKYGQDATNVGDEGGFAPNIQENKEGLELLKTAIEKAGYTGKVVIGMDVAASEFYKEDKSYDLNFKEENNDGSQRISGDALKDLYKSFASEYPIVSIEDPFDQDDWEHYAKMTAECGDKVQVVGDDLLVTNPKRVEKAINEKSCNALLLKVNQIGSVTESIEAVKMSKRAGWGVMASHRSGETEDTFIADLSVGLST…	>gi|731345370|ref|XP_010683886.1| PREDICTED: enolase [Beta vulgaris subsp. vulgaris]	0	1118.57	97	57	2909	55	55	444	48	5.49	6359.37	97	2909	57	2	70.3	69.1	63.4	83.9	90.4	120.5	118	137.6	114.6	132.2	1.49368e+09	1.20663e+09	7.93745e+08	1.35411e+09	2.52771e+09	1.13291e+09	2.46145e+09	3.14965e+09	3.06899e+09	6.0599e+09	3.22407e+09	3.16645e+09	2.90466e+09	3.8475e+09	4.14455e+09
	Checked	Confidence	Annotated Sequence	Modifications	Qvality PEP	Qvality q-value	# Protein Groups	# Proteins	# PSMs	Master Protein Accessions	Positions in Master Proteins	Modifications in Master Proteins	# Missed Cleavages	Theo. MH+ [Da]	Abundances (Scaled): F1: Control	Abundances (Scaled): F2: Control	Abundances (Scaled): F3: Control	Abundances (Scaled): F4: Control	Abundances (Scaled): F5: Control	Abundances (Scaled): F6: Sample	Abundances (Scaled): F7: Sample	Abundances (Scaled): F8: Sample	Abundances (Scaled): F9: Sample	Abundances (Scaled): F10: Sample	Quan Info	Found in Sample: [S1] F1: Control	Found in Sample: [S2] F2: Control	Found in Sample: [S3] F3: Control	Found in Sample: [S4] F4: Control	Found in Sample: [S5] F5: Control	Found in Sample: [S6] F6: Sample	Found in Sample: [S7] F7: Sample	Found in Sample: [S8] F8: Sample	Found in Sample: [S9] F9: Sample	Found in Sample: [S10] F10: Sample	Confidence (by Search Engine): Sequest HT	Percolator q-Value (by Search Engine): Sequest HT	Percolator PEP (by Search Engine): Sequest HT	XCorr (by Search Engine): Sequest HT	Top Apex RT [min]	Quan Usage	Quan Ratio Usage	Sequence in Protein	Positions in Proteins
	FALSE	High	[R].AAVPSGASTGVYEALELR.[D]		1.29546e-10	5.15092e-05	1	1	135	731345370	731345370 [35-52]		0	1790.93	63.5	37.7	44.7	131	61	74	68.5	243.9	125.4	150.2		High	High	High	High	High	High	High	High	High	High	High	7.602e-06	1.162e-13	2.62	43.52	Used	Used	R.AAVPSGASTGVYEALELR.D	[35-52]
	FALSE	High	[R].AAVPSGASTGVYEALELRDGGK.[D]		5.1047e-10	5.15092e-05	1	1	2	731345370	731345370 [35-56]		1	2148.09				2		16.5	381.1	332	240.1	28.1		Not Found	Not Found	Not Found	Peak Found	Not Found	Peak Found	Peak Found	Peak Found	High	High	High	7.602e-06	5.992e-13	3.19	35.99	Used	Used	R.AAVPSGASTGVYEALELRDGGK.D	[35-56]
	FALSE	High	[R].AAVPSGASTGVYEALELRDGGKDYMGK.[G]		4.27831e-14	5.15092e-05	1	1	49	731345370	731345370 [35-61]		2	2742.34	2.2	5.6	34.6	2.9	0.7	154.8	208.6	228.4	173.3	188.9		Peak Found	Peak Found	Peak Found	Peak Found	Peak Found	High	High	High	High	High	High	7.602e-06	1.454e-17	5.51	35.73	Used	Used	R.AAVPSGASTGVYEALELRDGGKDYMGK.G	[35-61]
	FALSE	High	[R].AAVPSGASTGVYEALELRDGGKDYMGK.[G]	1xOxidation [M25]	8.63467e-05	5.15092e-05	1	1	2	731345370	731345370 [35-61]		2	2758.34	119.4			27	20.2	17				816.4		Peak Found	Not Found	Not Found	Peak Found	Peak Found	Peak Found	Not Found	Not Found	Not Found	High	High	7.602e-06	1.13e-06	3.77	33.06	Used	Used	R.AAVPSGASTGVYEALELRDGGKDYMGK.G	[35-61]
	FALSE	High	[R].AGWGVMASHR.[S]		2.10874e-06	5.15092e-05	1	1	267	731345370	731345370 [372-381]		0	1071.52	54.2	87.2	43.9	48.4	79.2	170.6	171.1	120	149.9	75.5		High	High	High	High	High	High	High	High	High	High	High	7.602e-06	1.317e-08	3.09	9.76	Used	Used	R.AGWGVMASHR.S	[372-381]
	FALSE	High	[R].AGWGVMASHR.[S]	1xOxidation [M6]	8.25098e-05	5.15092e-05	1	1	14	731345370	731345370 [372-381]		0	1087.51	80.3	149.4	161.1	247	34	99.8	83.8	57.7	67.4	19.5		High	High	High	High	High	High	High	High	High	High	High	7.602e-06	1.072e-06	2.78	11.11	Used	Used	R.AGWGVMASHR.S	[372-381]
	FALSE	High	[K].AINEKSCNALLLK.[V]	1xCarbamidomethyl [C7]	1.37964e-06	5.15092e-05	1	1	11	731345370	731345370 [340-352]		1	1473.81						109.2	259.8	355.5	120.4	155.2		Not Found	Not Found	Not Found	Not Found	Not Found	High	High	High	High	High	High	7.602e-06	7.924e-09	2.95	16.47	Used	Used	K.AINEKSCNALLLK.V	[340-352]
	FALSE	High	[K].AINEKSCNALLLKVNQIGSVTESIEAVK.[M]	1xCarbamidomethyl [C7]	4.92072e-08	5.15092e-05	1	1	4	731345370	731345370 [340-367]		2	3028.63							525.8	201.8	158.7	113.7		Not Found	Not Found	Not Found	Not Found	Not Found	Not Found	High	High	Peak Found	High	High	7.602e-06	1.441e-10	4.44	52.82	Used	Used	K.AINEKSCNALLLKVNQIGSVTESIEAVK.M	[340-367]
	FALSE	High	[K].ARQIYDSRGNPTVEADVHLDDGTYAR.[A]		1.01067e-07	5.15092e-05	1	1	10	731345370	731345370 [9-34]		2	2919.4						41.8	235.8	484.5	49.1	188.8		Not Found	Not Found	Not Found	Not Found	Not Found	High	High	High	High	High	High	7.602e-06	3.428e-10	7.24	21.62	Used	Used	K.ARQIYDSRGNPTVEADVHLDDGTYAR.A	[9-34]
	FALSE	High	[K].AVQNVNEIIGPALVGK.[D]		0.000325049	5.15092e-05	1	1	2	731345370	731345370 [66-81]		0	1621.93				370.3				65.6	343.9	220.2		Not Found	Not Found	Not Found	High	Not Found	Not Found	Not Found	Peak Found	High	Peak Found	High	7.602e-06	5.525e-06	2.22	41.62	Used	Used	K.AVQNVNEIIGPALVGK.D	[66-81]
	FALSE	High	[K].AVQNVNEIIGPALVGKDPTEQTAIDNFMVQQLDGTVNEWGWCK.[Q]	1xCarbamidomethyl [C42]	6.22706e-07	5.15092e-05	1	1	48	731345370	731345370 [66-108]		1	4785.33	56.1	89.7	24.1	78	189.4	89.3	87.7	100.2	110.6	174.8		High	High	High	High	High	High	High	High	High	High	High	7.602e-06	3.027e-09	5.09	99.37	Used	Used	K.AVQNVNEIIGPALVGKDPTEQTAIDNFMVQQLDGTVNEWGWCK.Q	[66-108]
	FALSE	High	[K].AVQNVNEIIGPALVGKDPTEQTAIDNFMVQQLDGTVNEWGWCK.[Q]	1xCarbamidomethyl [C42]; 1xOxidation [M28]	4.17247e-05	5.15092e-05	1	1	6	731345370	731345370 [66-108]		1	4801.32			8.2		10.9	525.9	246.9	33.4	22.1	152.7		Not Found	Not Found	Peak Found	High	Peak Found	High	High	Peak Found	High	Peak Found	High	7.602e-06	4.734e-07	3.37	81.03	Used	Used	K.AVQNVNEIIGPALVGKDPTEQTAIDNFMVQQLDGTVNEWGWCK.Q	[66-108]
	FALSE	High	[K].DLYKSFASEYPIVSIEDPFDQDDWEHYAK.[M]	1xPhospho [E/K/S/Y]	1.85391e-06	5.15092e-05	1	1	4	731345370	731345370 [285-313]	731345370 1xPhospho [K/S]	1	3587.56								452.6		547.4		Not Found	Not Found	Not Found	Not Found	Not Found	Not Found	Not Found	Peak Found	Not Found	High	High	7.602e-06	1.123e-08	4.19	77.89	Used	Used	K.DLYKSFASEYPIVSIEDPFDQDDWEHYAK.M	[285-313]
	FALSE	High	[K].DPTEQTAIDNFMVQQLDGTVNEWGWCK.[Q]	1xCarbamidomethyl [C26]	1.2495e-07	5.15092e-05	1	1	2	731345370	731345370 [82-108]		0	3182.42	376.7		158	328.7	27.5				109.1			High	Not Found	Peak Found	Peak Found	Peak Found	Not Found	Not Found	Not Found	High	Not Found	High	7.602e-06	4.416e-10	6.03	99.21	Used	Used	K.DPTEQTAIDNFMVQQLDGTVNEWGWCK.Q	[82-108]
	FALSE	High	[K].EDKSYDLNFKEENNDGSQR.[I]		2.54699e-07	5.15092e-05	1	1	4	731345370	731345370 [259-277]		2	2288.01		171.7	28.8	448.8	92.8	137.2		11.7	43.9	65.2		Not Found	High	Peak Found	High	Peak Found	Peak Found	Not Found	Peak Found	Peak Found	High	High	7.602e-06	1.037e-09	3.12	10.47	Used	Used	K.EDKSYDLNFKEENNDGSQR.I	[259-277]
	FALSE	High	[K].EGLELLK.[T]		0.0140329	0.000377453	1	1	11	731345370	731345370 [227-233]		0	801.472	14.4	130.3	126.8	268.2	11.5	133.2	66.1	7.4	111.3	130.7		Peak Found	High	High	High	Peak Found	High	High	Peak Found	High	High	High	7.112e-05	0.0004564	1.73	17.64	Used	Used	K.EGLELLK.T	[227-233]
	FALSE	High	[R].GNPTVEADVHLDDGTYAR.[A]		1.44882e-13	5.15092e-05	1	1	144	731345370	731345370 [17-34]		0	1929.89	42.1	22.6	58	89.9	24	104.5	136.5	157.7	140	224.6		High	High	High	High	High	High	High	High	High	High	High	7.602e-06	5.665e-17	4.18	21.28	Used	Used	R.GNPTVEADVHLDDGTYAR.A	[17-34]
	FALSE	High	[K].KIPLYQHIAEIAGNPK.[M]		3.0763e-08	5.15092e-05	1	1	397	731345370	731345370 [132-147]		1	1792.01	164.9	159.7	148	98.5	58.9	93.8	64.8	56.7	69.6	85		High	High	High	High	High	High	High	High	High	High	High	7.602e-06	8.219e-11	2.54	108.83	Used	Used	K.KIPLYQHIAEIAGNPK.M	[132-147]
	FALSE	High	[K].KYGQDATNVGDEGGFAPNIQENK.[E]		0.000224268	5.15092e-05	1	1	3	731345370	731345370 [204-226]		1	2452.14	204.3	216.1		579.6								High	High	Not Found	High	Not Found	Not Found	Not Found	Not Found	Not Found	Not Found	High	7.602e-06	3.55e-06	1.66	17.7	Used	Used	K.KYGQDATNVGDEGGFAPNIQENK.E	[204-226]
	FALSE	High	[K].KYGQDATNVGDEGGFAPNIQENKEGLELLK.[T]		3.69821e-17	5.15092e-05	1	1	43	731345370	731345370 [204-233]		2	3234.59	155.6	170.4	46.3	13.8	140.8	113.8	79.4	108.2	58.5	113.3		High	High	High	High	High	High	High	High	High	High	High	7.602e-06	5.575e-21	7.76	36.79	Used	Used	K.KYGQDATNVGDEGGFAPNIQENKEGLELLK.T	[204-233]
	FALSE	High	[R].LAKYNQLLR.[I]		0.000268978	5.15092e-05	2	2	29	731334788; 731345370	731334788 [454-462]; 731345370 [413-421]		1	1118.67				3.8		117.4	300.5	230.4	178.5	169.4	Shared	Not Found	Not Found	Not Found	Peak Found	Not Found	High	High	High	High	High	High	7.602e-06	4.419e-06	3.04	9.49	Used	Used	R.LAKYNQLLR.I	[413-421]
	FALSE	High	[R].LAKYNQLLRIEEELGAAAVYAGANFR.[V]		7.08715e-06	5.15092e-05	1	1	8	731345370	731345370 [413-438]		2	2880.54	24				25.4	54.4	109.6	679.6	76.1	30.9		Peak Found	Not Found	Not Found	Not Found	Peak Found	Peak Found	High	High	Peak Found	High	High	7.602e-06	5.625e-08	3.01	94.72	Used	Used	R.LAKYNQLLRIEEELGAAAVYAGANFR.V	[413-438]
	FALSE	High	[K].LAMQEFMILPTGASSFK.[E]		2.41259e-09	5.15092e-05	1	1	66	731345370	731345370 [168-184]		0	1870.94	157.4	149	84.8	160.9	164.4	48.6	76	28.1	82	48.7		High	High	High	High	High	High	High	High	High	High	High	7.602e-06	3.866e-12	4.45	109.16	Used	Used	K.LAMQEFMILPTGASSFK.E	[168-184]
	FALSE	High	[K].LAMQEFMILPTGASSFK.[E]	1xOxidation [M]	2.89369e-09	5.15092e-05	1	1	34	731345370	731345370 [168-184]		0	1886.94	98.8	159.5	29.1	128.7	281	115	49.9	43.6	57.3	37.2		High	High	Peak Found	High	High	High	High	High	Peak Found	High	High	7.602e-06	4.846e-12	2.54	99.8	Used	Used	K.LAMQEFMILPTGASSFK.E	[168-184]
	FALSE	High	[K].LAMQEFMILPTGASSFK.[E]	2xOxidation [M3; M7]	1.73271e-05	5.15092e-05	1	1	3	731345370	731345370 [168-184]		0	1902.93	323.5			367.3	94.5	146.8		23.4		44.6		Peak Found	Not Found	Not Found	High	Peak Found	High	Not Found	Peak Found	Not Found	Peak Found	High	7.602e-06	1.644e-07	1.92	109.63	Used	Used	K.LAMQEFMILPTGASSFK.E	[168-184]
	FALSE	High	[K].LAMQEFMILPTGASSFKEAMK.[M]		1.14689e-11	5.15092e-05	1	1	28	731345370	731345370 [168-188]		1	2330.16	46	94.3	16.6	15.5	3.5	189.4	112.4	187.4	104.4	230.5		Peak Found	Peak Found	Peak Found	Peak Found	Peak Found	High	High	High	High	High	High	7.602e-06	7.369e-15	5.44	61.03	Used	Used	K.LAMQEFMILPTGASSFKEAMK.M	[168-188]
	FALSE	High	[K].LAMQEFMILPTGASSFKEAMK.[M]	1xOxidation [M3]	1.01895e-06	5.15092e-05	1	1	4	731345370	731345370 [168-188]		1	2346.15			6.7	21.2		198.8	57.5	500.9	50	164.9		Not Found	Not Found	Peak Found	Peak Found	Not Found	High	Peak Found	High	High	Peak Found	High	7.602e-06	5.479e-09	3.88	65.3	Used	Used	K.LAMQEFMILPTGASSFKEAMK.M	[168-188]
	FALSE	High	[K].LAMQEFMILPTGASSFKEAMK.[M]	3xOxidation [M3; M7; M20]	0.00658338	0.000145442	1	1	1	731345370	731345370 [168-188]		1	2378.14	34.6					793.2	109.2		63			Peak Found	Not Found	Not Found	Not Found	Not Found	High	Peak Found	Not Found	Peak Found	Not Found	High	3.22e-05	0.0001924	2.29	65.35	Used	Used	K.LAMQEFMILPTGASSFKEAMK.M	[168-188]
	FALSE	High	[R].IEEELGAAAVYAGANFR.[V]		1.08008e-10	5.15092e-05	1	1	61	731345370	731345370 [422-438]		0	1780.89	74.7	52.5	47.6	221.7	52.3	46.1	92.3	118	175	119.9		High	High	High	High	High	High	High	High	High	High	High	7.602e-06	9.36e-14	4.39	45.11	Used	Used	R.IEEELGAAAVYAGANFR.V	[422-438]
	FALSE	High	[R].IEEELGAAAVYAGANFRVPVEPY.[-]		2.14963e-12	5.15092e-05	1	1	42	731345370	731345370 [422-444]		1	2465.23	3.9	20.8	16.6	9.7	0.2	156.9	181.4	234.2	104.2	272.2		Peak Found	High	High	Peak Found	Peak Found	High	High	High	High	High	High	7.602e-06	1.146e-15	5.61	68.81	Used	Used	R.IEEELGAAAVYAGANFRVPVEPY.-	[422-444]
	FALSE	High	[K].LGANAILAVSLAVCK.[A]	1xCarbamidomethyl [C14]	2.72511e-08	5.15092e-05	1	1	22	731345370	731345370 [111-125]		0	1499.86	320.7	139.9	33.4	38.5	194.8	32.8	66.1	42.3	63.1	68.4		High	High	Peak Found	Peak Found	High	High	High	High	High	High	High	7.602e-06	7.12e-11	4.52	106.87	Used	Used	K.LGANAILAVSLAVCK.A	[111-125]
	FALSE	High	[K].LGANAILAVSLAVCKAGAQVK.[K]	1xCarbamidomethyl [C14]	8.22252e-11	5.15092e-05	1	1	3	731345370	731345370 [111-131]		1	2054.18	401.4		4.7			38.5		222.8	111.2	221.3		Peak Found	Not Found	Peak Found	Not Found	Not Found	Peak Found	Not Found	High	High	High	High	7.602e-06	6.703e-14	4.04	62.82	Used	Used	K.LGANAILAVSLAVCKAGAQVK.K	[111-131]
	FALSE	High	[K].IPLYQHIAEIAGNPK.[M]		6.81973e-07	5.15092e-05	1	1	28	731345370	731345370 [133-147]		0	1663.92	53	199.2	71.1	133.4	295.8	52.2	20.4	59.2	45.6	70.1		Peak Found	High	High	High	High	Peak Found	High	High	High	High	High	7.602e-06	3.387e-09	3.57	110.04	Used	Used	K.IPLYQHIAEIAGNPK.M	[133-147]
	FALSE	High	[R].ISGDALKDLYK.[S]		6.56237e-08	5.15092e-05	1	1	260	731345370	731345370 [278-288]		1	1222.67	35.9	60.6	47.9	91.6	220	88.1	93.7	110.4	103.9	147.9		High	High	High	High	High	High	High	High	High	High	High	7.602e-06	2.043e-10	3.81	23.92	Used	Used	R.ISGDALKDLYK.S	[278-288]
	FALSE	High	[R].ISGDALKDLYKSFASEYPIVSIEDPFDQDDWEHYAK.[M]		1.99396e-11	5.15092e-05	1	1	22	731345370	731345370 [278-313]		2	4191.97		5.6	4.8	4.7		416.9	113.9	176.3	154.4	123.4		Not Found	Peak Found	Peak Found	Peak Found	Not Found	High	High	High	High	High	High	7.602e-06	1.368e-14	4.24	99.07	Used	Used	R.ISGDALKDLYKSFASEYPIVSIEDPFDQDDWEHYAK.M	[278-313]
	FALSE	High	[K].MGSEVYHNLK.[S]		1.21362e-05	5.15092e-05	1	1	56	731345370	731345370 [189-198]		0	1177.57	41.4	59.5	76.5	66.3	137.2	203.3	71.8	126.5	132.5	85		High	High	High	High	High	High	High	High	High	High	High	7.602e-06	1.071e-07	1.84	8.33	Used	Used	K.MGSEVYHNLK.S	[189-198]
	FALSE	High	[K].MGSEVYHNLK.[S]	1xOxidation [M1]	7.53398e-05	5.15092e-05	1	1	5	731345370	731345370 [189-198]		0	1193.56	394.2	71.3	309.6	198.3		17.8		6.6		2.2		High	Peak Found	High	High	Not Found	Peak Found	Not Found	Peak Found	Not Found	Peak Found	High	7.602e-06	9.554e-07	2.13	75.29	Used	Used	K.MGSEVYHNLK.S	[189-198]
	FALSE	High	[K].MGSEVYHNLKSVIK.[K]		0.0475971	0.00113645	1	1	1	731345370	731345370 [189-202]		1	1604.85							288.8	490.2	221			Not Found	Not Found	Not Found	Not Found	Not Found	Not Found	High	Peak Found	Peak Found	Not Found	High	0.0001841	0.002089	1.93	21.03	Used	Used	K.MGSEVYHNLKSVIK.K	[189-202]
	FALSE	High	[K].MTAECGDKVQVVGDDLLVTNPK.[R]	1xCarbamidomethyl [C5]	5.88811e-12	5.15092e-05	1	1	58	731345370	731345370 [314-335]		1	2389.17	40.3	41	50	64.6	25.2	81.7	175.1	243.9	77.5	200.7		High	High	High	High	High	High	High	High	High	High	High	7.602e-06	3.505e-15	5.21	29.32	Used	Used	K.MTAECGDKVQVVGDDLLVTNPK.R	[314-335]
	FALSE	High	[K].MTAECGDKVQVVGDDLLVTNPK.[R]	1xCarbamidomethyl [C5]; 1xOxidation [M1]	2.07216e-10	5.15092e-05	1	1	16	731345370	731345370 [314-335]		1	2405.17	84.3	6.4	88.6	101.7	72.5	237.5	80.8	173	65.5	89.7		High	Peak Found	High	High	High	High	High	High	High	High	High	7.602e-06	2.042e-13	5.46	29.33	Used	Used	K.MTAECGDKVQVVGDDLLVTNPK.R	[314-335]
	FALSE	High	[-].MVAIKGIK.[A]	1xMet-loss [N-Term]	0.0133186	0.000333165	1	1	5	731345370	731345370 [1-8]	731345370 1xMet-loss [N-Term]	1	728.503	2.5		21.5			730.6		91.1	15.6	138.6		Peak Found	Not Found	Peak Found	Not Found	Not Found	High	Not Found	High	Peak Found	High	High	6.62e-05	0.0004288	1.77	10.78	Used	Used	-.MVAIKGIK.A	[1-8]
	FALSE	High	[-].MVAIKGIKAR.[Q]	1xGG [K8]; 1xMet-loss [N-Term]	0.0232527	0.000458975	1	1	6	731345370	731345370 [1-10]	731345370 1xMet-loss [N-Term]	2	1069.68						420.4	268.7	153.4		157.5		Not Found	Not Found	Not Found	Not Found	Not Found	High	High	High	Not Found	High	High	8.517e-05	0.0008279	3.02	10.09	Used	Used	-.MVAIKGIKAR.Q	[1-10]
	FALSE	High	[K].MVLPVPAFNVINGGSHAGNK.[L]		6.85145e-12	5.15092e-05	1	1	32	731345370	731345370 [148-167]		0	2022.06	124.2	67.7	134.2	187.7	171.5	45	52.1	96.1	56.9	64.6		High	High	High	High	Peak Found	High	High	High	High	High	High	7.602e-06	4.17e-15	4.47	107.78	Used	Used	K.MVLPVPAFNVINGGSHAGNK.L	[148-167]
	FALSE	High	[K].MVLPVPAFNVINGGSHAGNK.[L]	1xOxidation [M1]	0.00169277	5.15092e-05	1	1	2	731345370	731345370 [148-167]		0	2038.05		436.6	64.8			89.9	8.2	7.4	15.3	377.8		Not Found	High	Peak Found	Not Found	Not Found	Peak Found	Peak Found	Peak Found	Peak Found	High	High	7.602e-06	3.979e-05	1.2	36.63	Used	Used	K.MVLPVPAFNVINGGSHAGNK.L	[148-167]
	FALSE	High	[K].QKLGANAILAVSLAVCK.[A]	1xCarbamidomethyl [C16]	2.70772e-06	5.15092e-05	1	1	7	731345370	731345370 [109-125]		1	1756.01	542.6		24.1	96.7	108.2	50.5	61.3	5.5	60.3	50.7		High	Not Found	Peak Found	Peak Found	Peak Found	High	High	Peak Found	High	High	High	7.602e-06	1.767e-08	3.42	110	Used	Used	K.QKLGANAILAVSLAVCK.A	[109-125]
	FALSE	High	[R].QIYDSRGNPTVEADVHLDDGTYAR.[A]		6.79973e-12	5.15092e-05	1	1	32	731345370	731345370 [11-34]		1	2692.26	2.4	0.5	16	16.3		36.9	249.6	357.9	96.9	223.6		Peak Found	Peak Found	Peak Found	Peak Found	Not Found	High	High	High	High	High	High	7.602e-06	4.133e-15	4.52	24.68	Used	Used	R.QIYDSRGNPTVEADVHLDDGTYAR.A	[11-34]
	FALSE	High	[K].RAGWGVMASHR.[S]		1.74386e-07	5.15092e-05	1	1	139	731345370	731345370 [371-381]		1	1227.62	45.3	57	43.7	42.3	24.1	102.2	221.4	163	203.4	97.5		High	High	High	High	High	High	High	High	High	High	High	7.602e-06	6.574e-10	4.07	11.82	Used	Used	K.RAGWGVMASHR.S	[371-381]
	FALSE	High	[K].RAGWGVMASHR.[S]	1xOxidation [M7]	0.00232533	0.000100671	1	1	11	731345370	731345370 [371-381]		1	1243.61	59.1	347.3	9.2	143.5	306	2.9	38.1	54.4	4.7	34.9		High	High	Peak Found	High	High	Peak Found	Peak Found	Peak Found	Peak Found	High	High	1.369e-05	5.752e-05	2.41	94.96	Used	Used	K.RAGWGVMASHR.S	[371-381]
	FALSE	High	[K].SCNALLLK.[V]	1xCarbamidomethyl [C2]	0.0003869	5.15092e-05	1	1	109	731345370	731345370 [345-352]		0	918.508	52.7	24.2	74.1	74.8	25.3	118	178.7	149.9	180.5	121.8		High	High	High	High	High	High	High	High	High	High	High	7.602e-06	6.799e-06	3.3	18	Used	Used	K.SCNALLLK.V	[345-352]
	FALSE	High	[K].SCNALLLKVNQIGSVTESIEAVK.[M]	1xCarbamidomethyl [C2]	1.19257e-09	5.15092e-05	1	1	5	731345370	731345370 [345-367]		1	2473.33						52.4	417.8	235.4	156.5	137.9		Not Found	Not Found	Not Found	Not Found	Not Found	Peak Found	High	High	High	High	High	7.602e-06	1.663e-12	3.98	58.05	Used	Used	K.SCNALLLKVNQIGSVTESIEAVK.M	[345-367]
	FALSE	High	[K].SCNALLLKVNQIGSVTESIEAVKMSK.[R]	1xCarbamidomethyl [C2]	3.82995e-09	5.15092e-05	1	1	3	731345370	731345370 [345-370]		2	2819.5						28.9	384.1	252.1	25.5	309.3		Not Found	Not Found	Not Found	Not Found	Not Found	Peak Found	High	High	Peak Found	High	High	7.602e-06	6.737e-12	5.17	57.82	Used	Used	K.SCNALLLKVNQIGSVTESIEAVKMSK.R	[345-370]
	FALSE	High	[K].SFASEYPIVSIEDPFDQDDWEHYAK.[M]		4.44349e-14	5.15092e-05	1	1	146	731345370	731345370 [289-313]		0	2988.32	74.4	65.3	55.8	83.9	98.4	215.4	94.1	119.3	76.8	116.5		High	High	High	High	High	High	High	High	High	High	High	7.602e-06	1.515e-17	6.12	78.81	Used	Used	K.SFASEYPIVSIEDPFDQDDWEHYAK.M	[289-313]
	FALSE	High	[R].SGETEDTFIADLSVGLSTGQIK.[T]		2.16725e-11	5.15092e-05	1	1	33	731345370	731345370 [382-403]		0	2268.12	149.8	75.4	6.5	84.6	126.5	52.3	114.7	85.5	122.6	182.1		High	High	High	High	High	High	High	High	High	High	High	7.602e-06	1.503e-14	4.75	77.03	Used	Used	R.SGETEDTFIADLSVGLSTGQIK.T	[382-403]
	FALSE	High	[R].SGETEDTFIADLSVGLSTGQIKTGAPCRSER.[L]	1xCarbamidomethyl [C27]	3.79658e-11	5.15092e-05	1	1	4	731345370	731345370 [382-412]		2	3282.59					6.9	36.6	529.5	323.3	16.4	87.3		Not Found	Not Found	Not Found	Not Found	Peak Found	High	High	Peak Found	Peak Found	High	High	7.602e-06	2.815e-14	5.77	52.02	Used	Used	R.SGETEDTFIADLSVGLSTGQIKTGAPCRSER.L	[382-412]
	FALSE	High	[K].SYDLNFKEENNDGSQR.[I]		8.94764e-09	5.15092e-05	1	1	73	731345370	731345370 [262-277]		1	1915.84	78.8	64.8	141.5	141.1	26.5	218	72.5	41.9	107.7	107.2		High	High	High	High	High	High	High	High	High	High	High	7.602e-06	1.869e-11	2.71	10.61	Used	Used	K.SYDLNFKEENNDGSQR.I	[262-277]
	FALSE	High	[K].VNQIGSVTESIEAVK.[M]		4.84672e-08	5.15092e-05	1	1	69	731345370	731345370 [353-367]		0	1573.84	41.6	44	91.5	85	20.8	52.3	99.1	175.3	192.6	197.8		High	High	High	High	High	High	High	High	High	High	High	7.602e-06	1.422e-10	1.98	31.02	Used	Used	K.VNQIGSVTESIEAVK.M	[353-367]
	FALSE	High	[K].VNQIGSVTESIEAVKMSK.[R]		4.69928e-09	5.15092e-05	1	1	11	731345370	731345370 [353-370]		1	1920.01	0.6					8.1	225.8	297.7	98.3	369.4		Peak Found	Not Found	Not Found	Not Found	Not Found	Peak Found	High	High	High	High	High	7.602e-06	8.656e-12	5.42	34.34	Used	Used	K.VNQIGSVTESIEAVKMSK.R	[353-370]
	FALSE	High	[K].VNQIGSVTESIEAVKMSK.[R]	1xOxidation [M16]	0.031444	0.000805946	1	1	1	731345370	731345370 [353-370]		1	1936.01				63.9			257.3	308.5	214.6	155.7		Not Found	Not Found	Not Found	Peak Found	Not Found	Not Found	Peak Found	High	Peak Found	Peak Found	High	0.0001365	0.001204	2.11	30.53	Used	Used	K.VNQIGSVTESIEAVKMSK.R	[353-370]
	FALSE	High	[K].VNQIGSVTESIEAVKMSKR.[A]		6.07641e-10	5.15092e-05	1	1	3	731345370	731345370 [353-371]		2	2076.11			9.3			100.6	44.1	414.7	48.9	382.4		Not Found	Not Found	Peak Found	Not Found	Not Found	Peak Found	Peak Found	High	Peak Found	High	High	7.602e-06	7.449e-13	4.76	26.9	Used	Used	K.VNQIGSVTESIEAVKMSKR.A	[353-371]
	FALSE	High	[R].VPVEPY.[-]		0.145806	0.00465818	1	1	14	731345370	731345370 [439-444]		0	703.366	70.4	75.7	71.2	63	261.9	34.2	86.3	80.7	134.5	122.1		High	High	High	High	High	Peak Found	High	Peak Found	High	Peak Found	High	0.0006831	0.01257	1.52	20	Used	Used	R.VPVEPY.-	[439-444]
	FALSE	High	[K].VQVVGDDLLVTNPK.[R]		1.54568e-06	5.15092e-05	1	1	13	731345370	731345370 [322-335]		0	1496.83	93.9	25.7	159.7	224.6	59	48.6	50.9	122.2	137.5	77.9		High	High	High	High	High	High	Peak Found	Peak Found	High	High	High	7.602e-06	9.068e-09	2.67	29.03	Used	Used	K.VQVVGDDLLVTNPK.R	[322-335]
	FALSE	High	[K].VVIGMDVAASEFYK.[E]		7.24585e-07	5.15092e-05	1	1	2	731345370	731345370 [245-258]		0	1528.77	259.5	453.4	148.6	45.6				41		52		High	High	Peak Found	Peak Found	Not Found	Not Found	Not Found	Peak Found	Not Found	Peak Found	High	7.602e-06	3.648e-09	2.55	95.07	Used	Used	K.VVIGMDVAASEFYK.E	[245-258]
	FALSE	High	[K].VVIGMDVAASEFYKEDK.[S]		3.77236e-09	5.15092e-05	1	1	54	731345370	731345370 [245-261]		1	1900.94	178.2	38.6	56	102.5	336.8	82	54.1	33	68	50.7		High	High	High	High	High	High	High	High	High	High	High	7.602e-06	6.613e-12	3.52	107.76	Used	Used	K.VVIGMDVAASEFYKEDK.S	[245-261]
	FALSE	High	[K].VVIGMDVAASEFYKEDK.[S]	1xOxidation [M5]	1.48561e-09	5.15092e-05	1	1	11	731345370	731345370 [245-261]		1	1916.93	70	87.5	33	204.7	409.9	70.7	49.3	29.6	7.3	38		High	High	High	High	High	High	Peak Found	Peak Found	Peak Found	High	High	7.602e-06	2.176e-12	4.64	104.87	Used	Used	K.VVIGMDVAASEFYKEDK.S	[245-261]
	FALSE	High	[K].YGQDATNVGDEGGFAPNIQENK.[E]		0.000564981	5.15092e-05	1	1	3	731345370	731345370 [205-226]		0	2324.04	57.5	4.2	142.1	282	270.5	96.9		53.4	25	68.4		Peak Found	Peak Found	Peak Found	High	High	Peak Found	Not Found	Peak Found	Peak Found	High	High	7.602e-06	1.076e-05	2.33	43.15	Used	Used	K.YGQDATNVGDEGGFAPNIQENK.E	[205-226]
	FALSE	High	[K].YGQDATNVGDEGGFAPNIQENKEGLELLK.[T]		1.03932e-11	5.15092e-05	1	1	27	731345370	731345370 [205-233]		1	3106.5	97.7	124.6	45.5	58.2	121.1	52.3	85.7	172.9	115.5	126.3		High	High	High	High	High	High	High	High	High	High	High	7.602e-06	6.643e-15	6.31	44.5	Used	Used	K.YGQDATNVGDEGGFAPNIQENKEGLELLK.T	[205-233]
	FALSE	High	[K].YGQDATNVGDEGGFAPNIQENKEGLELLKTAIEK.[A]		6.11544e-12	5.15092e-05	1	1	7	731345370	731345370 [205-238]		2	3648.8				2		33.8	324.4	270.9	229.3	139.5		Not Found	Not Found	Not Found	Peak Found	Not Found	Peak Found	High	High	High	High	High	7.602e-06	3.665e-15	5.86	58.27	Used	Used	K.YGQDATNVGDEGGFAPNIQENKEGLELLKTAIEK.A	[205-238]
	FALSE	High	[K].YNQLLR.[I]		0.0983446	0.00271996	3	3	79	731348742; 731334788; 731345370	731348742 [450-455]; 731334788 [457-462]; 731345370 [416-421]		0	806.452	81.2	101.4	232.2	247.2	19	31.3	80.6	74.4	91.2	41.3	Shared	High	High	High	High	High	High	High	High	High	High	High	0.0003982	0.006371	1.51	13.15	Used	Used	K.YNQLLR.I	[416-421]
	FALSE	High	[K].YNQLLRIEEELGAAAVYAGANFR.[V]		2.65918e-11	5.15092e-05	1	1	40	731345370	731345370 [416-438]		1	2568.32	25.1	19.5	37.6	19.4	48.1	225.7	147.3	157.1	242.3	78.1		Peak Found	Peak Found	Peak Found	High	Peak Found	High	High	High	High	High	High	7.602e-06	1.886e-14	3.72	98.62	Used	Used	K.YNQLLRIEEELGAAAVYAGANFR.V	[416-438]
	FALSE	High	[K].YNQLLRIEEELGAAAVYAGANFRVPVEPY.[-]		9.98924e-15	5.15092e-05	1	1	63	731345370	731345370 [416-444]		2	3252.67	7.5	5	6.3	2.3		214.4	275.2	191.8	148.7	148.7		Peak Found	Peak Found	Peak Found	Peak Found	Not Found	High	High	High	High	High	High	7.602e-06	2.856e-18	7.05	104.94	Used	Used	K.YNQLLRIEEELGAAAVYAGANFRVPVEPY.-	[416-444]
FALSE		High	Master Protein	7544846374039703004	3328	731318762	PREDICTED: LOW QUALITY PROTEIN: uncharacterized protein LOC104887018 [Beta vulgaris subsp. vulgaris]	MAGKGEGPAIGIDLGTTYSCVGVWQHDRVEIIANDQGNRTTPSYVAFTDSERLIGDAAKNQVAMNPINTVFDAKRLIGRRFSDASVQADIKLWPFKVIPGPGEKPMIVVNYKGEEKQFAAEEISSMVLTKMKEIAEAYLGSTVKNAVVTVPAYFNDSQRQATKDAGVISGLNVMRIINEPTAAAIAYGLDKKATSVGEKNVLIFDLGGGTFDVSLLTIEEGIFEVKATAGDTHLGGEDFDNRMVNHFVQEFKRKHKKDISGNPRALRRLRTSCERAKRTLSSTAQTTIEIDSLFEGVDFYSPITRARFEELNMDLFRKCMEPVEKCLRDAKMDKSTVHEVVLVGGSTRIPKVQQLLQDFFNGKELCKSINPDEAVAYGAAVQAAILSGEGNEKVQDLLL…	>gi|731318762|ref|XP_010669896.1| PREDICTED: LOW QUALITY PROTEIN: uncharacterized protein LOC104887018 [Beta vulgaris subsp. vulgaris]	0	1090.1	62	78	2612	43	45	1526	168.7	5.91	5494.63	62	2612	78	44	73.4	82.4	105.2	93.9	114.3	96.8	108.2	100.4	101.3	124.2	1.1378e+09	1.0508e+09	9.62272e+08	1.10573e+09	2.33227e+09	6.64843e+08	1.64857e+09	1.67754e+09	1.98119e+09	4.15678e+09	2.45591e+09	2.75752e+09	3.52138e+09	3.14177e+09	3.82408e+09
	Checked	Confidence	Annotated Sequence	Modifications	Qvality PEP	Qvality q-value	# Protein Groups	# Proteins	# PSMs	Master Protein Accessions	Positions in Master Proteins	Modifications in Master Proteins	# Missed Cleavages	Theo. MH+ [Da]	Abundances (Scaled): F1: Control	Abundances (Scaled): F2: Control	Abundances (Scaled): F3: Control	Abundances (Scaled): F4: Control	Abundances (Scaled): F5: Control	Abundances (Scaled): F6: Sample	Abundances (Scaled): F7: Sample	Abundances (Scaled): F8: Sample	Abundances (Scaled): F9: Sample	Abundances (Scaled): F10: Sample	Quan Info	Found in Sample: [S1] F1: Control	Found in Sample: [S2] F2: Control	Found in Sample: [S3] F3: Control	Found in Sample: [S4] F4: Control	Found in Sample: [S5] F5: Control	Found in Sample: [S6] F6: Sample	Found in Sample: [S7] F7: Sample	Found in Sample: [S8] F8: Sample	Found in Sample: [S9] F9: Sample	Found in Sample: [S10] F10: Sample	Confidence (by Search Engine): Sequest HT	Percolator q-Value (by Search Engine): Sequest HT	Percolator PEP (by Search Engine): Sequest HT	XCorr (by Search Engine): Sequest HT	Top Apex RT [min]	Quan Usage	Quan Ratio Usage	Sequence in Protein	Positions in Proteins
	FALSE	High	[R].ARFEELNMDLFR.[K]		3.8322e-08	5.15092e-05	3	3	155	731352584; 731349044; 731318762	731352584 [317-328]; 731349044 [306-317]; 731318762 [306-317]; [1181-1192]		1	1540.76	143.7	149.4	132.9	113	108.8	109.7	54	68.6	56.8	63.1	Shared	High	High	High	High	High	High	High	High	High	High	High	7.602e-06	1.07e-10	3.82	49.29	Used	Used	R.ARFEELNMDLFR.K; R.ARFEELNMDLFR.K	[306-317]; [1181-1192]
	FALSE	High	[R].ARFEELNMDLFR.[K]	1xOxidation [M8]	0.00193957	5.15092e-05	3	3	34	731352584; 731349044; 731318762	731352584 [317-328]; 731349044 [306-317]; 731318762 [306-317]; [1181-1192]		1	1556.75	161.4	27.4	35.5	66.6	135.2	440.1	22.8	30.8	31.3	48.9	Shared	High	High	High	High	High	High	High	High	Peak Found	High	High	7.602e-06	4.658e-05	2.25	104.65	Used	Used	R.ARFEELNMDLFR.K; R.ARFEELNMDLFR.K	[306-317]; [1181-1192]
	FALSE	High	[R].ARFEELNMDLFRK.[C]		1.85391e-06	5.15092e-05	3	3	191	731352584; 731349044; 731318762	731352584 [317-329]; 731349044 [306-318]; 731318762 [306-318]; [1181-1193]		2	1668.85	71.7	96.5	115.5	46.5	0.2	136.6	184.3	98.1	131	119.4	Shared	High	High	High	High	Peak Found	High	High	High	High	High	High	7.602e-06	1.129e-08	4.98	34.91	Used	Used	R.ARFEELNMDLFRK.C; R.ARFEELNMDLFRK.C	[306-318]; [1181-1193]
	FALSE	High	[R].ARFEELNMDLFRK.[C]	1xOxidation [M8]	1.74488e-06	5.15092e-05	3	3	29	731352584; 731349044; 731318762	731352584 [317-329]; 731349044 [306-318]; 731318762 [306-318]; [1181-1193]		2	1684.85	50	33.7	50.8	37.2	164.6	405.9	65.5	34.6	38.1	119.5	Shared	Peak Found	Peak Found	High	High	High	High	High	High	High	High	High	7.602e-06	1.045e-08	4.11	111.39	Used	Used	R.ARFEELNMDLFRK.C; R.ARFEELNMDLFRK.C	[306-318]; [1181-1193]
	FALSE	High	[K].ATAGDTHLGGEDFDNR.[ML]		2.42666e-12	5.15092e-05	3	3	66	731349044; 731318762; 731310842	731349044 [227-242]; 731318762 [227-242]; [1102-1117]; 731310842 [226-241]		0	1675.73	72.4	27	130.4	111	25	166.5	95.2	98.3	130.9	143.2	Shared	High	High	High	High	High	High	High	High	High	High	High	7.602e-06	1.313e-15	4.89	13.21	Used	Used	K.ATAGDTHLGGEDFDNR.M; K.ATAGDTHLGGEDFDNR.M	[227-242]; [1102-1117]
	FALSE	High	[K].ATAGDTHLGGEDFDNRMVNHFVQEFK.[R]		4.26351e-07	5.15092e-05	2	2	8	731349044; 731318762	731349044 [227-252]; 731318762 [227-252]; [1102-1127]		1	2935.34						121.6	346.9	93.2	220.3	218.1	Shared	Not Found	Not Found	Not Found	Not Found	Not Found	High	High	High	High	High	High	7.602e-06	1.929e-09	3.65	45.35	Used	Used	K.ATAGDTHLGGEDFDNRMVNHFVQEFK.R; K.ATAGDTHLGGEDFDNRMVNHFVQEFK.R	[227-252]; [1102-1127]
	FALSE	High	[K].ATAGDTHLGGEDFDNRMVNHFVQEFKR.[K]		1.12376e-07	5.15092e-05	2	2	4	731349044; 731318762	731349044 [227-253]; 731318762 [227-253]; [1102-1128]		2	3091.44						133.3	704.9	8.5	10.5	142.8	Shared	Not Found	Not Found	Not Found	Not Found	Not Found	Peak Found	High	Peak Found	Peak Found	High	High	7.602e-06	3.885e-10	4.88	39.45	Used	Used	K.ATAGDTHLGGEDFDNRMVNHFVQEFKR.K; K.ATAGDTHLGGEDFDNRMVNHFVQEFKR.K	[227-253]; [1102-1128]
	FALSE	High	[K].CMEPVEK.[SC]	1xCarbamidomethyl [C1]	0.0340802	0.000849464	3	3	1	731352584; 731349044; 731318762	731352584 [330-336]; 731349044 [319-325]; 731318762 [319-325]; [1194-1200]		0	892.39	7.1	6.2		194.6	762.2					29.9	Shared	Peak Found	Peak Found	Not Found	Peak Found	High	Not Found	Not Found	Not Found	Not Found	Peak Found	High	0.0001418	0.001334	2.13	10.57	Used	Used	K.CMEPVEK.C; K.CMEPVEK.C	[319-325]; [1194-1200]
	FALSE	High	[K].CMEPVEKCLR.[D]	2xCarbamidomethyl [C1; C8]	2.45515e-05	5.15092e-05	2	2	1	731349044; 731318762	731349044 [319-328]; 731318762 [319-328]; [1194-1203]		1	1321.61					1.7	101.8	245.2	460.5	76.1	114.7	Shared	Not Found	Not Found	Not Found	Not Found	Peak Found	Peak Found	Peak Found	High	Peak Found	Peak Found	High	7.602e-06	2.496e-07	3.15	12.84	Used	Used	K.CMEPVEKCLR.D; K.CMEPVEKCLR.D	[319-328]; [1194-1203]
	FALSE	High	[K].CMEPVEKCLRDAK.[M]	2xCarbamidomethyl [C1; C8]	0.0003988	5.15092e-05	2	2	3	731349044; 731318762	731349044 [319-331]; 731318762 [319-331]; [1194-1206]		2	1635.77	1		7.4	6.4		69.3	274.7	565.3	25.6	50.3	Shared	Peak Found	Not Found	Peak Found	Peak Found	Not Found	Peak Found	High	High	Peak Found	Peak Found	High	7.602e-06	7.06e-06	2.5	13.16	Used	Used	K.CMEPVEKCLRDAK.M; K.CMEPVEKCLRDAK.M	[319-331]; [1194-1206]
	FALSE	High	[K].DAGVIAGLNVMR.[I]		4.26601e-06	5.15092e-05	1	1	33	731318762	731318762 [1039-1050]		0	1215.65	38.1	22.9	92.1	91.3	57.9	12.9	206.5	239.4	177.7	61.2		High	High	High	High	High	High	High	High	High	High	High	7.602e-06	3.062e-08	3.31	38.65	Used	Used	K.DAGVIAGLNVMR.I	[1039-1050]
	FALSE	High	[K].DAGVIAGLNVMR.[I]	1xOxidation [M11]	0.0117299	0.000239412	1	1	8	731318762	731318762 [1039-1050]		0	1231.65	3	169	275.7	112.5	17.1	56.3	68.6	35.9	29.5	232.5		Peak Found	Peak Found	Peak Found	High	High	High	High	Peak Found	Peak Found	High	High	5.511e-05	0.0003734	0.87	29.98	Used	Used	K.DAGVIAGLNVMR.I	[1039-1050]
	FALSE	High	[K].DAGVISGLNVMR.[I]		3.17468e-06	5.15092e-05	2	3	30	731349044; 731318762	731349044 [164-175]; 731318762 [164-175]		0	1231.65	57	43	184.5	157.8	44.7	68	68.9	172.6	158	45.4	Shared	High	High	High	High	High	High	High	High	High	High	High	7.602e-06	2.151e-08	2.82	35.37	Used	Used	K.DAGVISGLNVMR.I	[164-175]
	FALSE	High	[K].DAGVISGLNVMR.[I]	1xOxidation [M11]	0.0011082	5.15092e-05	2	3	29	731349044; 731318762	731349044 [164-175]; 731318762 [164-175]		0	1247.64	32.2	344.7	274.1	76.6	17.7	31.6	30.2	68.7	64.1	60.1	Shared	High	High	High	High	High	High	Peak Found	High	High	High	High	7.602e-06	2.4e-05	1.2	101.37	Used	Used	K.DAGVISGLNVMR.I	[164-175]
	FALSE	High	[R].DAKMDKSTVHDVVLVGGSTR.[I]		2.3805e-06	5.15092e-05	1	1	4	731318762	731318762 [1204-1223]		2	2115.09						71.2	226.8	255.9	150	296.1		Not Found	Not Found	Not Found	Not Found	Not Found	Peak Found	Peak Found	High	High	High	High	7.602e-06	1.524e-08	3.16	14.75	Used	Used	R.DAKMDKSTVHDVVLVGGSTR.I	[1204-1223]
	FALSE	High	[R].DAKMDKSTVHEVVLVGGSTR.[I]		0.00225609	0.000100671	1	1	1	731318762	731318762 [329-348]		2	2129.1	13.4		155.3	120.2		81.2	256.1		198	175.9		Peak Found	Not Found	Peak Found	Peak Found	Not Found	Peak Found	Peak Found	Not Found	High	Peak Found	High	1.369e-05	5.581e-05	1.1	14.94	Used	Used	R.DAKMDKSTVHEVVLVGGSTR.I	[329-348]
	FALSE	High	[KR].DNNLLGK.[F]		0.0452516	0.00109551	3	3	2	731352584; 731349044; 731318762	731352584 [469-475]; 731349044 [458-464]; 731318762 [458-464]; [1333-1339]		0	773.415	55.6	289.8	514	26.5	43.5	41.9	12	4.7		12	Shared	High	Peak Found	Peak Found	Peak Found	High	Peak Found	Peak Found	Peak Found	Not Found	Peak Found	High	0.0001795	0.001944	1.56	19.28	Used	Used	R.DNNLLGK.F; R.DNNLLGK.F	[458-464]; [1333-1339]
	FALSE	High	[K].EIAEAYLGSTVK.[N]		0.0188981	0.000413429	1	1	1	731318762	731318762 [133-144]		0	1280.67			77.9	922.1								Not Found	Not Found	Peak Found	High	Not Found	Not Found	Not Found	Not Found	Not Found	Not Found	High	7.552e-05	0.0006436	1.32	22.61	Used	Used	K.EIAEAYLGSTVK.N	[133-144]
	FALSE	High	[K].ELEGICNPIIAK.[M]	1xCarbamidomethyl [C6]	0.000195684	5.15092e-05	2	2	1	731349044; 731318762	731349044 [604-615]; 731318762 [1479-1490]		0	1356.72											Not Reliable	Not Found	Not Found	Not Found	High	Not Found	Not Found	Not Found	Not Found	Not Found	Not Found	High	7.602e-06	3.015e-06	1.54		Not Used	Not Used	K.ELEGICNPIIAK.M	[1479-1490]
	FALSE	High	[K].ELESICNPIIAK.[M]	1xCarbamidomethyl [C6]	0.0015934	5.15092e-05	1	1	3	731318762	731318762 [604-615]		0	1386.73	72.2	51.8	178	294.9		32.4	58.4	73.9	79.9	158.6		High	Peak Found	Peak Found	High	Not Found	Peak Found	Peak Found	Peak Found	High	Peak Found	High	7.602e-06	3.708e-05	2.13	27.72	Used	Used	K.ELESICNPIIAK.M	[604-615]
	FALSE	High	[K].EQVFSTYSDNQPGVLIQVYEGER.[T]		7.4688e-07	5.15092e-05	1	1	43	731318762	731318762 [431-453]; [1306-1328]		0	2658.27	91	86.4	86.6	113.7	51.2	68.2	107.9	177.9	110.2	106.8		High	High	High	High	High	High	High	High	High	High	High	7.602e-06	3.786e-09	3.83	59.09	Used	Used	K.EQVFSTYSDNQPGVLIQVYEGER.T; K.EQVFSTYSDNQPGVLIQVYEGER.T	[431-453]; [1306-1328]
	FALSE	High	[K].EQVFSTYSDNQPGVLIQVYEGERTR.[T]		5.0751e-07	5.15092e-05	1	1	10	731318762	731318762 [431-455]; [1306-1330]		1	2915.42						35.5	154.3	177.6	383.2	249.4		Not Found	Not Found	Not Found	Not Found	Not Found	High	High	High	High	High	High	7.602e-06	2.371e-09	2.87	50.12	Used	Used	K.EQVFSTYSDNQPGVLIQVYEGERTR.T; K.EQVFSTYSDNQPGVLIQVYEGERTR.T	[431-455]; [1306-1330]
	FALSE	High	[R].FEELNMDLFR.[K]		9.38504e-05	5.15092e-05	3	3	12	731352584; 731349044; 731318762	731352584 [319-328]; 731349044 [308-317]; 731318762 [308-317]; [1183-1192]		0	1313.62	37.3	39	43.7	14.9	464.9	76.5	82	68.5	98.5	74.6	Shared	High	Peak Found	High	Peak Found	High	Peak Found	High	High	High	High	High	7.602e-06	1.252e-06	2.25	102.37	Used	Used	R.FEELNMDLFR.K; R.FEELNMDLFR.K	[308-317]; [1183-1192]
	FALSE	High	[R].FEELNMDLFR.[K]	1xOxidation [M6]	0.000105144	5.15092e-05	3	3	9	731352584; 731349044; 731318762	731352584 [319-328]; 731349044 [308-317]; 731318762 [308-317]; [1183-1192]		0	1329.61	126.4	33.7	17.3	229.5	224.2	269.1	5.8	32.4	14	47.8	Shared	High	High	Peak Found	High	High	High	Peak Found	Peak Found	Peak Found	High	High	7.602e-06	1.433e-06	1.88	91.94	Used	Used	R.FEELNMDLFR.K; R.FEELNMDLFR.K	[308-317]; [1183-1192]
	FALSE	High	[R].FEELNMDLFRK.[C]		0.00013811	5.15092e-05	3	3	16	731352584; 731349044; 731318762	731352584 [319-329]; 731349044 [308-318]; 731318762 [308-318]; [1183-1193]		1	1441.71	1.7	4.1	9.7	33.7	744.3	40.4	16	66.3	30.8	53	Shared	Peak Found	High	High	High	High	High	High	High	High	High	High	7.602e-06	1.977e-06	3.25	107.44	Used	Used	R.FEELNMDLFRK.C; R.FEELNMDLFRK.C	[308-318]; [1183-1193]
	FALSE	High	[R].FSDASVQADIK.[L]		2.87691e-06	5.15092e-05	1	1	10	731318762	731318762 [81-91]		0	1180.58	65.9	4.1	230.9	346	0.8	25.8	56.5	96.7	77	96.2		High	Peak Found	High	High	High	High	Peak Found	High	High	High	High	7.602e-06	1.906e-08	2.2	14.96	Used	Used	R.FSDASVQADIK.L	[81-91]
	FALSE	High	[R].FSDASVQADIKLWPFK.[V]		5.99559e-07	5.15092e-05	1	1	10	731318762	731318762 [81-96]		1	1851.96	94.6	85.7	88.7	56.8	146.5	203.6	107.6	103	91.2	22.1		High	High	Peak Found	High	High	Peak Found	High	High	High	High	High	7.602e-06	2.904e-09	3.53	58.93	Used	Used	R.FSDASVQADIKLWPFK.V	[81-96]
	FALSE	High	[K].KEQVFSTYSDNQPGVLIQVYEGER.[T]		0.00693917	0.000145442	1	1	3	731318762	731318762 [430-453]; [1305-1328]		1	2786.36	156.4	115.8	26.5	139.2	327	143	10.1	16.9	43.2	21.9		High	Peak Found	Peak Found	High	High	Peak Found	Peak Found	Peak Found	Peak Found	Peak Found	High	3.22e-05	0.0002047	1.97	105.25	Used	Used	K.KEQVFSTYSDNQPGVLIQVYEGER.T; K.KEQVFSTYSDNQPGVLIQVYEGER.T	[430-453]; [1305-1328]
	FALSE	High	[K].KIEDAIDSTIQWLDGNQLAEADEFEDKMK.[E]		2.85519e-06	5.15092e-05	1	1	3	731318762	731318762 [575-603]		2	3352.59	261.2	159.3	308.7	100.8	37.3	24	44.3	11.5	43.8	9.2		High	High	High	Peak Found	Peak Found	Peak Found	Peak Found	Peak Found	Peak Found	Peak Found	High	7.602e-06	1.887e-08	5.82	105.36	Used	Used	K.KIEDAIDSTIQWLDGNQLAEADEFEDKMK.E	[575-603]
	FALSE	High	[K].KIEEAIDNAIQWLDSNQLAEADEFDDKMK.[E]		2.81061e-07	5.15092e-05	1	1	1	731318762	731318762 [1450-1478]		2	3379.6		192.5	477.4	286.8				17.5		25.8		Not Found	Peak Found	High	Peak Found	Not Found	Not Found	Not Found	Peak Found	Not Found	Peak Found	High	7.602e-06	1.168e-09	3.87	105.4	Used	Used	K.KIEEAIDNAIQWLDSNQLAEADEFDDKMK.E	[1450-1478]
	FALSE	High	[K].IEEAIDNAIQWLDSNQLAEADEFDDKMKELEGICNPIIAK.[M]	1xCarbamidomethyl [C34]	0.0179409	0.000413429	1	1	1	731318762	731318762 [1451-1490]		2	4589.21										1000		Not Found	Not Found	Not Found	Not Found	Not Found	Not Found	Not Found	Not Found	Not Found	High	High	7.552e-05	0.0006099	1.87	105.22	Used	Used	K.IEEAIDNAIQWLDSNQLAEADEFDDKMKELEGICNPIIAK.M	[1451-1490]
	FALSE	High	[R].LIGDAAKNQVAMNPINTVFDAK.[R]		2.08914e-09	5.15092e-05	1	1	6	731318762	731318762 [53-74]		1	2330.22	4.1		12.4	6.1	5.1	36	159.3	315.4	168	293.5		Peak Found	Not Found	Peak Found	Peak Found	Peak Found	High	High	High	Peak Found	Peak Found	High	7.602e-06	3.262e-12	3.79	43.44	Used	Used	R.LIGDAAKNQVAMNPINTVFDAK.R	[53-74]
	FALSE	High	[R].LIGDAAKNQVAMNPINTVFDAKR.[L]		1.04907e-08	5.15092e-05	1	1	6	731318762	731318762 [53-75]		2	2486.32			7	7.9	2.4	58.1	346.9	78.5	213.9	285.3		Not Found	Not Found	Peak Found	Peak Found	Peak Found	Peak Found	High	Peak Found	High	High	High	7.602e-06	2.259e-11	5.23	35.88	Used	Used	R.LIGDAAKNQVAMNPINTVFDAKR.L	[53-75]
	FALSE	High	[R].IINEPTAAAIAYGLDK.[KRM]		1.49779e-08	5.15092e-05	6	9	50	731352584; 731321538; 731313035; 731349044; 731318762; 731310842	731352584 [187-202]; 731321538 [204-219]; 731313035 [178-193]; 731349044 [176-191]; 731318762 [176-191]; [1051-1066]; 731310842 [174-189]		0	1659.9	58.1	32.4	30.6	96.8	63.8	69.9	110.8	210.4	118.8	208.3	Shared	High	High	High	High	High	High	High	High	High	High	High	7.602e-06	3.46e-11	3.49	43.64	Used	Used	R.IINEPTAAAIAYGLDK.K; R.IINEPTAAAIAYGLDK.K	[176-191]; [1051-1066]
	FALSE	High	[R].IINEPTAAAIAYGLDKK.[AGS]		3.79658e-11	5.15092e-05	5	7	269	731352584; 731313035; 731349044; 731318762; 731310842	731352584 [187-203]; 731313035 [178-194]; 731349044 [176-192]; 731318762 [176-192]; [1051-1067]; 731310842 [174-190]		1	1787.99	54.3	78.2	43.8	38.6	190.9	86.2	171.6	74	88.1	174.3	Shared	High	High	High	High	High	High	High	High	High	High	High	7.602e-06	2.815e-14	4.69	34.15	Used	Used	R.IINEPTAAAIAYGLDKK.A; R.IINEPTAAAIAYGLDKK.A	[176-192]; [1051-1067]
	FALSE	High	[R].IINEPTAAAIAYGLDKK.[AGS]	1xGG [K]	0.000164396	5.15092e-05	5	7	5	731352584; 731313035; 731349044; 731318762; 731310842	731352584 [187-203]; 731313035 [178-194]; 731349044 [176-192]; 731318762 [176-192]; [1051-1067]; 731310842 [174-190]		1	1902.03			144.3				170.1	22.3	560.2	103.2	Shared	Not Found	Not Found	High	Not Found	Not Found	Not Found	Peak Found	Peak Found	High	High	High	7.602e-06	2.435e-06	2.17	30.44	Used	Used	R.IINEPTAAAIAYGLDKK.A; R.IINEPTAAAIAYGLDKK.A	[176-192]; [1051-1067]
	FALSE	High	[R].IINEPTAAAIAYGLDKKATSVGEK.[N]		6.60063e-11	5.15092e-05	1	2	1	731318762	731318762 [176-199]; [1051-1074]		2	2460.33			115	102.6			99.5	438.3	137.7	106.8		Not Found	Not Found	Peak Found	Peak Found	Not Found	Not Found	Peak Found	High	Peak Found	Peak Found	High	7.602e-06	5.206e-14	3.72	35.51	Used	Used	R.IINEPTAAAIAYGLDKKATSVGEK.N; R.IINEPTAAAIAYGLDKKATSVGEK.N	[176-199]; [1051-1074]
	FALSE	High	[R].IPKVQQLLQDFFNGKELCK.[S]	1xCarbamidomethyl [C18]	2.91912e-07	5.15092e-05	3	3	4	731349044; 731318762; 731310842	731349044 [349-367]; 731318762 [349-367]; [1224-1242]; 731310842 [348-366]		2	2305.24	127.8	17.8	10	58.3		270.2	31.4	219.2	135.7	129.5	Shared	Peak Found	Peak Found	Peak Found	Peak Found	Not Found	Peak Found	Peak Found	High	High	High	High	7.602e-06	1.229e-09	3.85	106.29	Used	Used	R.IPKVQQLLQDFFNGKELCK.S; R.IPKVQQLLQDFFNGKELCK.S	[349-367]; [1224-1242]
	FALSE	High	[R].LSKDEIEK.[M]		0.00601511	0.000145442	1	1	3	731318762	731318762 [516-523]		1	961.52	686.6	31.9	132.8	99.7		18.7	8.9		21.4			High	Peak Found	Peak Found	Peak Found	Not Found	Peak Found	Peak Found	Not Found	Peak Found	Not Found	High	3.22e-05	0.0001746	1.68	89.34	Used	Used	R.LSKDEIEK.M	[516-523]
	FALSE	High	[K].ISSKLAEADKK.[K]	1xGG [K4]	0.0084993	0.000145442	1	1	1	731318762	731318762 [1439-1449]		2	1303.72			131.3	236.8		367.9		147		117.1		Not Found	Not Found	Peak Found	Peak Found	Not Found	High	Not Found	Peak Found	Not Found	Peak Found	High	3.817e-05	0.000257	1.49	9.89	Used	Used	K.ISSKLAEADKK.K	[1439-1449]
	FALSE	High	[K].ITITNDK.[G]		0.00252684	0.000100671	5	5	3	731352584; 731321538; 731349044; 731318762; 731310842	731352584 [518-524]; 731321538 [532-538]; 731349044 [507-513]; 731318762 [507-513]; [1382-1388]; 731310842 [506-512]		0	804.446	147.2	108.4	273.9	130.5	137.3	74.7		62.1	65.9		Shared	High	Peak Found	Peak Found	High	High	Peak Found	Not Found	Peak Found	Peak Found	Not Found	High	1.369e-05	6.345e-05	1.6	8.56	Used	Used	K.ITITNDK.G; K.ITITNDK.G	[507-513]; [1382-1388]
	FALSE	High	[K].ITITNDKGR.[L]		0.00776707	0.000145442	5	5	3	731352584; 731321538; 731349044; 731318762; 731310842	731352584 [518-526]; 731321538 [532-540]; 731349044 [507-515]; 731318762 [507-515]; [1382-1390]; 731310842 [506-514]		1	1017.57	811.4		52.3		26.8	45.9	11.3	46		6.2	Shared	High	Not Found	High	Not Found	Peak Found	Peak Found	Peak Found	Peak Found	Not Found	Peak Found	High	3.22e-05	0.000232	1.47	86.46	Used	Used	K.ITITNDKGR.L; K.ITITNDKGR.L	[507-515]; [1382-1390]
	FALSE	High	[K].ITITNDKGR.[L]	1xGG [K7]	0.000184178	5.15092e-05	5	5	45	731352584; 731321538; 731349044; 731318762; 731310842	731352584 [518-526]; 731321538 [532-540]; 731349044 [507-515]; 731318762 [507-515]; [1382-1390]; 731310842 [506-514]		1	1131.61	63.2	67.2	505.8	150.7	47.6	51.9	44.9	21.9	23.3	23.6	Shared	High	High	High	High	High	High	Peak Found	Peak Found	Peak Found	Peak Found	High	7.602e-06	2.798e-06	2.36	9.64	Used	Used	K.ITITNDKGR.L; K.ITITNDKGR.L	[507-515]; [1382-1390]
	FALSE	High	[-].MAGKGEGPAIGIDLGTTYSCVGVWQHDRVEIIANDQGNR.[T]	1xCarbamidomethyl [C20]; 1xMet-loss+Acetyl [N-Term]	1.38769e-09	5.15092e-05	1	1	1	731318762	731318762 [1-39]	731318762 1xMet-loss+Acetyl [N-Term]	2	4095.99	187.6	498.9			313.5							High	Peak Found	Not Found	Not Found	Peak Found	Not Found	Not Found	Not Found	Not Found	Not Found	High	7.602e-06	1.992e-12	5.7	109.53	Used	Used	-.MAGKGEGPAIGIDLGTTYSCVGVWQHDRVEIIANDQGNR.T	[1-39]
	FALSE	High	[K].MDKSTVHDVVLVGGSTR.[I]		3.9111e-12	5.15092e-05	1	1	38	731318762	731318762 [1207-1223]		1	1800.93	30.7	29.2	23.6	21.2	6	249.1	170.3	106.8	162	201.1		High	High	Peak Found	High	High	High	High	High	High	High	High	7.602e-06	2.224e-15	4.24	9.8	Used	Used	K.MDKSTVHDVVLVGGSTR.I	[1207-1223]
	FALSE	High	[K].MDKSTVHDVVLVGGSTRIPK.[V]		9.8911e-06	5.15092e-05	1	1	2	731318762	731318762 [1207-1226]		2	2139.16						76.9	379	446.2	97.9			Not Found	Not Found	Not Found	Not Found	Not Found	Peak Found	High	High	Peak Found	Not Found	High	7.602e-06	8.412e-08	2.89	19.78	Used	Used	K.MDKSTVHDVVLVGGSTRIPK.V	[1207-1226]
	FALSE	High	[K].MDKSTVHEVVLVGGSTR.[I]		5.1047e-10	5.15092e-05	1	1	15	731318762	731318762 [332-348]		1	1814.94	43.8	46.8	4.6	27.9	40.3	337.2	136.1	10.2	152.4	200.7		Peak Found	High	Peak Found	High	High	High	High	High	Peak Found	High	High	7.602e-06	6.032e-13	5.29	9.82	Used	Used	K.MDKSTVHEVVLVGGSTR.I	[332-348]
	FALSE	High	[K].MDKSTVHEVVLVGGSTRIPK.[V]		0.00192496	5.15092e-05	1	1	1	731318762	731318762 [332-351]		2	2153.17						91.5	411.7	406.5	90.3			Not Found	Not Found	Not Found	Not Found	Not Found	Peak Found	High	Peak Found	Peak Found	Not Found	High	7.602e-06	4.612e-05	2.78	20.12	Used	Used	K.MDKSTVHEVVLVGGSTRIPK.V	[332-351]
	FALSE	High	[K].MKEIADAFLGITVK.[N]		4.39971e-05	5.15092e-05	1	1	7	731318762	731318762 [1006-1019]		1	1535.85	383.4	207.3		122.9	68.8	9.8	53.6	46.9	59.9	47.3		High	High	Not Found	Peak Found	High	Peak Found	High	High	High	High	High	7.602e-06	5.045e-07	2.73	110.06	Used	Used	K.MKEIADAFLGITVK.N	[1006-1019]
	FALSE	High	[K].MKEIAEAYLGSTVK.[N]		6.86756e-08	5.15092e-05	1	1	15	731318762	731318762 [131-144]		1	1539.81	173.6	145.2	74.8	146.6	277.5	53.6	14.8	25	56.7	32.3		High	High	High	High	High	High	Peak Found	High	Peak Found	Peak Found	High	7.602e-06	2.158e-10	3.1	105.03	Used	Used	K.MKEIAEAYLGSTVK.N	[131-144]
	FALSE	High	[K].MKEIAEAYLGSTVK.[N]	1xOxidation [M1]	4.04792e-05	5.15092e-05	1	1	1	731318762	731318762 [131-144]		1	1555.8		540.7			278.4	74.5	48.1	31.1	27.3			Not Found	Peak Found	Not Found	Not Found	High	Peak Found	Peak Found	Peak Found	Peak Found	Not Found	High	7.602e-06	4.564e-07	2.46	104.48	Used	Used	K.MKEIAEAYLGSTVK.N	[131-144]
	FALSE	High	[R].MVNHFVQEFK.[R]		1.26932e-06	5.15092e-05	2	2	171	731349044; 731318762	731349044 [243-252]; 731318762 [243-252]; [1118-1127]		0	1278.63	67.5	117.3	56.8	101.1	253.5	115.4	48.9	67.8	85.5	86.1	Shared	High	High	High	High	High	High	High	High	High	High	High	7.602e-06	7.112e-09	3.35	107.92	Used	Used	R.MVNHFVQEFK.R; R.MVNHFVQEFK.R	[243-252]; [1118-1127]
	FALSE	High	[R].MVNHFVQEFK.[R]	1xOxidation [M1]	2.47241e-06	5.15092e-05	2	2	16	731349044; 731318762	731349044 [243-252]; 731318762 [243-252]; [1118-1127]		0	1294.62	103.8	98.8	20	92.2	532.1	49.4	22	8	41.1	32.5	Shared	High	High	Peak Found	High	High	Peak Found	Peak Found	Peak Found	High	High	High	7.602e-06	1.585e-08	2.78	106.38	Used	Used	R.MVNHFVQEFK.R; R.MVNHFVQEFK.R	[243-252]; [1118-1127]
	FALSE	High	[R].MVNHFVQEFKR.[K]		1.12442e-06	5.15092e-05	2	2	218	731349044; 731318762	731349044 [243-253]; 731318762 [243-253]; [1118-1128]		1	1434.73	60.5	114.1	45.4	118.7	82.8	118.4	112.5	88.6	141.2	117.7	Shared	High	High	High	High	High	High	High	High	High	High	High	7.602e-06	6.194e-09	4.17	15.09	Used	Used	R.MVNHFVQEFKR.K; R.MVNHFVQEFKR.K	[243-253]; [1118-1128]
	FALSE	High	[R].MVNHFVQEFKR.[K]	1xOxidation [M1]	4.13867e-06	5.15092e-05	2	2	7	731349044; 731318762	731349044 [243-253]; 731318762 [243-253]; [1118-1128]		1	1450.73	180	509.5		277.2	0.2	7.3	3.7	4.6	10	7.5	Shared	Peak Found	High	Not Found	High	Peak Found	High	Peak Found	Peak Found	Peak Found	Peak Found	High	7.602e-06	2.937e-08	3.46	97.85	Used	Used	R.MVNHFVQEFKR.K; R.MVNHFVQEFKR.K	[243-253]; [1118-1128]
	FALSE	High	[R].MVNHFVQEFKR.[K]	1xGG [K10]	0.000392805	5.15092e-05	2	2	6	731349044; 731318762	731349044 [243-253]; 731318762 [243-253]; [1118-1128]		1	1548.77				8.6		8.4	265.7	152	448	117.3	Shared	Not Found	Not Found	Not Found	Peak Found	Not Found	Peak Found	High	Peak Found	High	High	High	7.602e-06	6.925e-06	3.28	10.6	Used	Used	R.MVNHFVQEFKR.K; R.MVNHFVQEFKR.K	[243-253]; [1118-1128]
	FALSE	High	[R].MVNHFVQEFKRK.[H]		0.0214359	0.000413429	2	2	1	731349044; 731318762	731349044 [243-254]; 731318762 [243-254]; [1118-1129]		2	1562.83							699.3	249.4	14.6	36.6	Shared	Not Found	Not Found	Not Found	Not Found	Not Found	Not Found	High	Peak Found	Peak Found	Peak Found	High	7.97e-05	0.0007499	1.79	10.38	Used	Used	R.MVNHFVQEFKRK.H; R.MVNHFVQEFKRK.H	[243-254]; [1118-1129]
	FALSE	High	[K].MYQGAGGEGGVPMDDDVPSAGASSGAGAGPK.[I]		1.2495e-07	5.15092e-05	1	1	8	731318762	731318762 [1491-1521]		0	2793.21	5.1		215.9	285.8	137.4	21.1	44.7	35.3	137.3	117.3		Peak Found	Not Found	High	High	High	Peak Found	Peak Found	High	High	High	High	7.602e-06	4.408e-10	2.89	24.99	Used	Used	K.MYQGAGGEGGVPMDDDVPSAGASSGAGAGPK.I	[1491-1521]
	FALSE	High	[K].MYQGAGGEGGVPMDDDVPSAGASSGAGAGPKIEEVD.[-]		7.5256e-07	5.15092e-05	1	1	5	731318762	731318762 [1491-1526]		1	3378.47			23.8	13.5		44.2	230.1	292.1	89.4	307		Not Found	Not Found	Peak Found	Peak Found	Not Found	Peak Found	High	High	High	High	High	7.602e-06	3.806e-09	2.37	35.67	Used	Used	K.MYQGAGGEGGVPMDDDVPSAGASSGAGAGPKIEEVD.-	[1491-1526]
	FALSE	High	[K].NALENYAYNMR.[N]		1.00363e-06	5.15092e-05	2	2	165	731349044; 731318762	731349044 [546-556]; 731318762 [546-556]; [1421-1431]		0	1358.62	62.6	34.2	84.7	137.3	48.7	100.1	64.8	166.3	117.8	183.4	Shared	High	High	High	High	High	High	High	High	High	High	High	7.602e-06	5.365e-09	2.74	28.99	Used	Used	K.NALENYAYNMR.N; K.NALENYAYNMR.N	[546-556]; [1421-1431]
	FALSE	High	[K].NALENYAYNMR.[N]	1xOxidation [M10]	2.85682e-05	5.15092e-05	2	2	22	731349044; 731318762	731349044 [546-556]; 731318762 [546-556]; [1421-1431]		0	1374.61	8.7	25.8	91.5	219.7	69.9	223.9	58.1	116.1	104.3	82	Shared	Peak Found	High	Peak Found	High	High	High	High	High	High	High	High	7.602e-06	2.992e-07	2.58	19.94	Used	Used	K.NALENYAYNMR.N; K.NALENYAYNMR.N	[546-556]; [1421-1431]
	FALSE	High	[K].NAVVTVPAYFNDSQR.[Q]		2.20422e-08	5.15092e-05	3	7	61	731349044; 731318762; 731310842	731349044 [145-159]; 731318762 [145-159]; [1020-1034]; 731310842 [143-157]		0	1680.83	107.8	36.6	211.1	110.1	114.1	27.4	86.3	94.5	103.3	108.8	Shared	High	High	High	High	High	High	High	High	High	High	High	7.602e-06	5.503e-11	3.6	33.65	Used	Used	K.NAVVTVPAYFNDSQR.Q; K.NAVVTVPAYFNDSQR.Q	[145-159]; [1020-1034]
	FALSE	High	[K].NKITITNDKGR.[L]		1.19468e-06	5.15092e-05	4	4	2	731352584; 731349044; 731318762; 731310842	731352584 [516-526]; 731349044 [505-515]; 731318762 [505-515]; [1380-1390]; 731310842 [504-514]		2	1259.71			22.4	24.2		933.1				20.4	Shared	Not Found	Not Found	Peak Found	Peak Found	Not Found	High	Not Found	Not Found	High	Peak Found	High	7.602e-06	6.629e-09	3.39	9.41	Used	Used	K.NKITITNDKGR.L; K.NKITITNDKGR.L	[505-515]; [1380-1390]
	FALSE	High	[K].NKITITNDKGR.[L]	1xGG [K9]	0.0040349	0.000100671	4	4	3	731352584; 731349044; 731318762; 731310842	731352584 [516-526]; 731349044 [505-515]; 731318762 [505-515]; [1380-1390]; 731310842 [504-514]		2	1373.75			14.7	228.4		639.2	44.8			72.8	Shared	Not Found	Not Found	Peak Found	High	Not Found	High	Peak Found	Not Found	Not Found	High	High	1.369e-05	0.0001095	2.86	9.71	Used	Used	K.NKITITNDKGR.L; K.NKITITNDKGR.L	[505-515]; [1380-1390]
	FALSE	High	[K].NQVAMNPINTVFDAK.[R]		5.06915e-09	5.15092e-05	1	1	44	731318762	731318762 [60-74]		0	1661.83	79.1	36.3	53.7	126	80.4	61.7	114.8	170.1	134.2	143.8		High	High	High	High	High	High	High	High	High	High	High	7.602e-06	9.436e-12	3.72	39.93	Used	Used	K.NQVAMNPINTVFDAK.R	[60-74]
	FALSE	High	[K].NQVAMNPINTVFDAK.[R]	1xOxidation [M5]	1.58213e-05	5.15092e-05	1	1	9	731318762	731318762 [60-74]		0	1677.83	37.7	19.1	84	85	77.4	129.1	78.6	171.9	33	284.2		High	Peak Found	High	High	High	High	High	High	Peak Found	Peak Found	High	7.602e-06	1.478e-07	2.2	33.52	Used	Used	K.NQVAMNPINTVFDAK.R	[60-74]
	FALSE	High	[K].NQVAMNPINTVFDAKR.[L]		3.82546e-11	5.15092e-05	1	1	72	731318762	731318762 [60-75]		1	1817.93	60.3	69	31.3	58.2	84.1	58.9	155.2	133.5	84.3	265.3		High	High	High	High	High	High	High	High	High	High	High	7.602e-06	2.835e-14	4.85	33.05	Used	Used	K.NQVAMNPINTVFDAKR.L	[60-75]
	FALSE	High	[K].NQVAMNPINTVFDAKR.[L]	1xOxidation [M5]	0.00029681	5.15092e-05	1	1	5	731318762	731318762 [60-75]		1	1833.93			116.4	92.5	20.7	248.2	77.2	45.4	193.4	206.1		Not Found	Not Found	Peak Found	Peak Found	High	High	High	Peak Found	High	High	High	7.602e-06	4.976e-06	2.26	33.61	Used	Used	K.NQVAMNPINTVFDAKR.L	[60-75]
	FALSE	High	[R].NTTIPTKKEQVFSTYSDNQPGVLIQVYEGER.[T]		2.17235e-07	5.15092e-05	1	1	15	731318762	731318762 [423-453]; [1298-1328]		2	3541.78						53.9	234.3	305.6	96.3	310		Not Found	Not Found	Not Found	Not Found	Not Found	High	High	High	High	High	High	7.602e-06	8.612e-10	4.19	43.17	Used	Used	R.NTTIPTKKEQVFSTYSDNQPGVLIQVYEGER.T; R.NTTIPTKKEQVFSTYSDNQPGVLIQVYEGER.T	[423-453]; [1298-1328]
	FALSE	High	[R].NTVKDEKIGAK.[L]	1xGG [K]	0.000207908	5.15092e-05	1	1	11	731318762	731318762 [557-567]		2	1316.72	105.5	208.2	434	67.4	80.9	70.4		11.4	19.8	2.3		High	High	High	High	High	Peak Found	Not Found	Peak Found	Peak Found	Peak Found	High	7.602e-06	3.249e-06	2.49	45.86	Used	Used	R.NTVKDEKIGAK.L	[557-567]
	FALSE	High	[R].NTVKDEKISSK.[L]	1xGG [K]	0.0675446	0.00154085	1	1	5	731318762	731318762 [1432-1442]		2	1362.72	227.3	264.7		88.7	191.1	228.2						High	High	Not Found	Peak Found	High	Peak Found	Not Found	Not Found	Not Found	Not Found	High	0.0002345	0.003479	1.88	44.49	Used	Used	R.NTVKDEKISSK.L	[1432-1442]
	FALSE	High	[K].NVLIFDLGGGTFDVSILTIEEGIFEVK.[SA]		2.75062e-05	5.15092e-05	4	4	4	731352584; 731349044; 731318762; 731310842	731352584 [211-237]; 731349044 [200-226]; 731318762 [200-226]; [1075-1101]; 731310842 [199-225]		0	2925.55		176.4	689.6	64.5						69.5	Shared	Not Found	Peak Found	High	Peak Found	Not Found	Not Found	Not Found	Not Found	Not Found	High	High	7.602e-06	2.863e-07	2.01	109.04	Used	Used	K.NVLIFDLGGGTFDVSLLTIEEGIFEVK.A; K.NVLIFDLGGGTFDVSLLTIEEGIFEVK.A	[200-226]; [1075-1101]
	FALSE	High	[R].QATKDAGVIAGLNVMR.[I]		4.32353e-09	5.15092e-05	1	1	30	731318762	731318762 [1035-1050]		1	1643.89			3.6			101.9	183	288	100.1	323.4		Not Found	Not Found	Peak Found	Not Found	Not Found	High	High	High	High	High	High	7.602e-06	7.82e-12	4.02	27.53	Used	Used	R.QATKDAGVIAGLNVMR.I	[1035-1050]
	FALSE	High	[R].QATKDAGVISGLNVMR.[I]		1.60442e-07	5.15092e-05	2	3	23	731349044; 731318762	731349044 [160-175]; 731318762 [160-175]		1	1659.88						86.1	160.7	242.5	199.9	310.8	Shared	Not Found	Not Found	Not Found	Not Found	Not Found	High	High	High	High	High	High	7.602e-06	5.945e-10	3.84	25.99	Used	Used	R.QATKDAGVISGLNVMR.I	[160-175]
	FALSE	High	[K].QFAAEEISSMVLTK.[M]		2.12478e-06	5.15092e-05	1	2	7	731318762	731318762 [117-130]		0	1553.79	358.4	1.7	20.1	107.6	24	28.6	80.6	108.9	232.7	37.3		High	Peak Found	Peak Found	High	High	Peak Found	Peak Found	High	High	High	High	7.602e-06	1.321e-08	3.59	98.55	Used	Used	K.QFAAEEISSMVLTK.M	[117-130]
	FALSE	High	[K].RTLSSTAQTTIEIDSLFEGVDFYSPITR.[A]		3.74828e-07	5.15092e-05	1	1	2	731318762	731318762 [278-305]		1	3147.58							142.7	116.9	185.6	554.7		Not Found	Not Found	Not Found	Not Found	Not Found	Not Found	Peak Found	High	Peak Found	High	High	7.602e-06	1.657e-09	5.07	88.1	Used	Used	K.RTLSSTAQTTIEIDSLFEGVDFYSPITR.A	[278-305]
	FALSE	High	[K].SINPDEAVAYGAAVQAAILSGEGNEK.[V]		1.42703e-13	5.15092e-05	3	3	38	731352584; 731349044; 731318762	731352584 [379-404]; 731349044 [368-393]; 731318762 [368-393]; [1243-1268]		0	2574.27	108.7	85.5	123.4	101.7	259.3	82.4	83.5	53.5	57.1	44.9	Shared	High	High	High	High	High	High	High	High	High	High	High	7.602e-06	5.556e-17	4.68	105.94	Used	Used	K.SINPDEAVAYGAAVQAAILSGEGNEK.V; K.SINPDEAVAYGAAVQAAILSGEGNEK.V	[368-393]; [1243-1268]
	FALSE	High	[K].STVHDVVLVGGSTR.[I]		3.98015e-08	5.15092e-05	1	1	44	731318762	731318762 [1210-1223]		0	1426.76	67.7	88.8	78.1	45.1	29.1	168.3	147.6	114.2	116.8	144.2		High	High	High	High	High	High	High	High	High	High	High	7.602e-06	1.122e-10	3.41	14.71	Used	Used	K.STVHDVVLVGGSTR.I	[1210-1223]
	FALSE	High	[K].STVHDVVLVGGSTRIPK.[V]		2.09403e-05	5.15092e-05	1	1	1	731318762	731318762 [1210-1226]		1	1765				357.3		144.1	77.1	48.3		373.2		Not Found	Not Found	Not Found	Peak Found	Not Found	Peak Found	Peak Found	Peak Found	Not Found	High	High	7.602e-06	2.056e-07	3.69	21.13	Used	Used	K.STVHDVVLVGGSTRIPK.V	[1210-1226]
	FALSE	High	[K].STVHEVVLVGGSTR.[I]		2.0916e-07	5.15092e-05	1	1	32	731318762	731318762 [335-348]		0	1440.78	7.7	61.3	25	149.7	1.7	232.1	156.1	112.6	129.6	124.3		High	Peak Found	High	High	High	High	High	High	High	High	High	7.602e-06	8.223e-10	3.06	13.46	Used	Used	K.STVHEVVLVGGSTR.I	[335-348]
	FALSE	High	[K].STVHEVVLVGGSTRIPK.[V]		0.00289483	0.000100671	1	1	1	731318762	731318762 [335-351]		1	1779.01							618.3	381.7				Not Found	Not Found	Not Found	Not Found	Not Found	Not Found	High	Peak Found	Not Found	Not Found	High	1.369e-05	7.43e-05	2.41	16.83	Used	Used	K.STVHEVVLVGGSTRIPK.V	[335-351]
	FALSE	High	[R].TLSSTAQTTIEIDSLFEGVDFYSPITR.[A]		7.97707e-11	5.15092e-05	1	1	17	731318762	731318762 [279-305]		0	2991.48	14.8	151.7	474	259.5	1	10.6	8.3	17	15.7	47.4		High	High	Peak Found	High	Peak Found	High	High	High	High	High	High	7.602e-06	6.491e-14	3.61	98.66	Used	Used	R.TLSSTAQTTIEIDSLFEGVDFYSPITR.A	[279-305]
	FALSE	High	[R].TLSSTAQTTIEIDSLYEGVDFYTTITR.[A]		1.89762e-05	5.15092e-05	2	2	2	731349044; 731318762	731349044 [279-305]; 731318762 [1154-1180]		0	3025.49							704.9	295.1			Shared	Not Found	Not Found	Not Found	Not Found	Not Found	Not Found	High	Peak Found	Not Found	High	High	7.602e-06	1.836e-07	1.62	95.25	Used	Used	R.TLSSTAQTTIEIDSLYEGVDFYTTITR.A	[1154-1180]
	FALSE	High	[R].TRDNNLLGK.[F]		0.115709	0.00347713	2	2	3	731349044; 731318762	731349044 [456-464]; 731318762 [456-464]; [1331-1339]		1	1030.56	435.1	22.1	162.7	41.2	2.1	275.8	27	21.9		12.1	Shared	High	High	Peak Found	Peak Found	Peak Found	High	Peak Found	Peak Found	Not Found	Peak Found	High	0.0004934	0.008397	2	90.05	Used	Used	R.TRDNNLLGK.F; R.TRDNNLLGK.F	[456-464]; [1331-1339]
	FALSE	High	[R].TTPSYVAFTDSER.[L]		1.31833e-06	5.15092e-05	1	1	139	731318762	731318762 [40-52]		0	1473.69	75.1	56.9	99.4	84.4	75	60.9	117.4	101.9	177.5	151.5		High	High	High	High	High	High	High	High	High	High	High	7.602e-06	7.491e-09	1.69	25.4	Used	Used	R.TTPSYVAFTDSER.L	[40-52]
	FALSE	High	[R].TTPSYVAFTDSERLIGDAAK.[N]		5.85054e-10	5.15092e-05	1	1	50	731318762	731318762 [40-59]		1	2142.07	1.1	1	14.6	2		95.2	246	198.4	202.2	239.4		Peak Found	Peak Found	Peak Found	Peak Found	Not Found	High	High	High	High	High	High	7.602e-06	7.087e-13	4.95	43.7	Used	Used	R.TTPSYVAFTDSERLIGDAAK.N	[40-59]
	FALSE	High	[R].TTPSYVAFTDSERLIGDAAKNQVAMNPINTVFDAK.[R]		0.000453592	5.15092e-05	1	1	3	731318762	731318762 [40-74]		2	3784.89						452.6	189.7	54	303.7			Not Found	Not Found	Not Found	Not Found	Not Found	High	High	High	Peak Found	Not Found	High	7.602e-06	8.253e-06	3.03	75.09	Used	Used	R.TTPSYVAFTDSERLIGDAAKNQVAMNPINTVFDAK.R	[40-74]
	FALSE	High	[KR].VEIIANDQGNR.[IT]		7.82483e-05	5.15092e-05	4	4	15	731321538; 731349044; 731313180; 731318762	731321538 [57-67]; 731349044 [29-39]; 731313180 [29-39]; 731318762 [29-39]		0	1228.63	86.4	11.3	530.4	132.1	31.5	35.1	29.5	48.7	49.4	45.7	Shared	High	High	High	High	High	Peak Found	High	Peak Found	High	High	High	7.602e-06	1e-06	2.48	10.06	Used	Used	R.VEIIANDQGNR.T	[29-39]
	FALSE	High	[K].VIPGPGEKPMIVVNYKGEEK.[Q]		3.03182e-07	5.15092e-05	1	1	12	731318762	731318762 [97-116]		1	2184.17	346.2	74.2	146.4	219.9	112.8	13.6	1.2	4.6	4.9	76.2		High	Peak Found	High	High	High	Peak Found	Peak Found	Peak Found	Peak Found	High	High	7.602e-06	1.276e-09	3.73	98.94	Used	Used	K.VIPGPGEKPMIVVNYKGEEK.Q	[97-116]
	FALSE	High	[K].VIPGPGEKPMIVVNYKGEEKQFAAEEISSMVLTK.[M]		0.0241275	0.000547401	1	1	1	731318762	731318762 [97-130]		2	3718.94											No Quan Values	Not Found	Not Found	Not Found	Not Found	Not Found	Not Found	High	Not Found	Not Found	Not Found	High	9.626e-05	0.0008621	1.71		Not Used	Not Used	K.VIPGPGEKPMIVVNYKGEEKQFAAEEISSMVLTK.M	[97-130]
	FALSE	High	[K].VQDLLLLDVTPLSLGLETAGGVMTVLIPR.[N]		8.65001e-15	5.15092e-05	2	2	60	731349044; 731318762	731349044 [394-422]; 731318762 [394-422]; [1269-1297]		0	3033.73	114.5	195	72.2	91.8	48.1	32.9	147.1	136.5	130.8	31.1	Shared	High	High	High	High	High	High	High	High	High	High	High	7.602e-06	2.433e-18	4.82	109.26	Used	Used	K.VQDLLLLDVTPLSLGLETAGGVMTVLIPR.N; K.VQDLLLLDVTPLSLGLETAGGVMTVLIPR.N	[394-422]; [1269-1297]
	FALSE	High	[K].VQDLLLLDVTPLSLGLETAGGVMTVLIPR.[N]	1xOxidation [M23]	1.22285e-05	5.15092e-05	2	2	6	731349044; 731318762	731349044 [394-422]; 731318762 [394-422]; [1269-1297]		0	3049.72		411.1			114.1	308.8	54.5		81	30.5	Shared	Not Found	High	Not Found	Not Found	Peak Found	High	Peak Found	Not Found	Peak Found	Peak Found	High	7.602e-06	1.078e-07	4.2	109.97	Used	Used	K.VQDLLLLDVTPLSLGLETAGGVMTVLIPR.N; K.VQDLLLLDVTPLSLGLETAGGVMTVLIPR.N	[394-422]; [1269-1297]
	FALSE	High	[K].VQQLLQDFFNGK.[E]		2.22359e-06	5.15092e-05	3	3	42	731349044; 731318762; 731310842	731349044 [352-363]; 731318762 [352-363]; [1227-1238]; 731310842 [351-362]		0	1436.75	153.5	194.7	52.1	129.7	324.5	42.1	18.4	21.7	31	32.3	Shared	High	High	High	High	High	High	High	High	High	High	High	7.602e-06	1.405e-08	2.33	106.4	Used	Used	K.VQQLLQDFFNGK.E; K.VQQLLQDFFNGK.E	[352-363]; [1227-1238]
	FALSE	High	[K].VQQLLQDFFNGKELCK.[S]	1xCarbamidomethyl [C15]	6.07998e-09	5.15092e-05	3	3	38	731349044; 731318762; 731310842	731349044 [352-367]; 731318762 [352-367]; [1227-1242]; 731310842 [351-366]		1	1967.01	78.3	21.2	35.2	64.1	93.3	99	162.5	131.2	128.4	186.7	Shared	High	High	High	Peak Found	High	High	High	High	High	High	High	7.602e-06	1.172e-11	4.9	49.75	Used	Used	K.VQQLLQDFFNGKELCK.S; K.VQQLLQDFFNGKELCK.S	[352-367]; [1227-1242]
FALSE		High	Master Protein	2594060806488363212	2302	731333855	PREDICTED: glyceraldehyde-3-phosphate dehydrogenase [Beta vulgaris subsp. vulgaris]	MAKIKIGINGFGRIGRLVARVILQRDDVELVAVNDPFITTDYMTYMFKYDSVHGQWKHHELKVKDEKTLLFGEKPVSVFGCRNPEEIPWSQTGADFVVESTGVFTDKDKAAAHLKGGAKKVVISAPSKDAPMFVVGVNEHEYKSDLHIVSNASCTTNCLAPLAKVINDKFGIVEGLMTTVHSITATQKTVDGPSAKDWRGGRAASFNIIPSSTGAAKAVGKVLPALNGKLTGMAFRVPTVDVSVVDLTVRLEKAATYEDIKAAIKAESEGKMKGILGYTEDDVVSTDFIGDNRSSIFDAKAGIALNDHFAKLVSWYDNEWGYSSRVVDLIVHMSKTE	>gi|731333855|ref|XP_010677936.1| PREDICTED: glyceraldehyde-3-phosphate dehydrogenase [Beta vulgaris subsp. vulgaris]	0	1070.22	95	52	2989	37	37	337	36.7	7.25	7034.2	95	2989	52	17	101.9	102.4	86.4	99.7	95.9	133	93.5	95.1	88.6	103.6	2.84607e+09	2.3513e+09	1.4236e+09	2.11414e+09	3.52326e+09	1.64352e+09	2.56603e+09	2.86101e+09	3.1181e+09	6.24037e+09	6.14317e+09	6.17031e+09	5.20959e+09	6.00702e+09	5.77688e+09
	Checked	Confidence	Annotated Sequence	Modifications	Qvality PEP	Qvality q-value	# Protein Groups	# Proteins	# PSMs	Master Protein Accessions	Positions in Master Proteins	Modifications in Master Proteins	# Missed Cleavages	Theo. MH+ [Da]	Abundances (Scaled): F1: Control	Abundances (Scaled): F2: Control	Abundances (Scaled): F3: Control	Abundances (Scaled): F4: Control	Abundances (Scaled): F5: Control	Abundances (Scaled): F6: Sample	Abundances (Scaled): F7: Sample	Abundances (Scaled): F8: Sample	Abundances (Scaled): F9: Sample	Abundances (Scaled): F10: Sample	Quan Info	Found in Sample: [S1] F1: Control	Found in Sample: [S2] F2: Control	Found in Sample: [S3] F3: Control	Found in Sample: [S4] F4: Control	Found in Sample: [S5] F5: Control	Found in Sample: [S6] F6: Sample	Found in Sample: [S7] F7: Sample	Found in Sample: [S8] F8: Sample	Found in Sample: [S9] F9: Sample	Found in Sample: [S10] F10: Sample	Confidence (by Search Engine): Sequest HT	Percolator q-Value (by Search Engine): Sequest HT	Percolator PEP (by Search Engine): Sequest HT	XCorr (by Search Engine): Sequest HT	Top Apex RT [min]	Quan Usage	Quan Ratio Usage	Sequence in Protein	Positions in Proteins
	FALSE	High	[R].AASFNIIPSSTGAAK.[A]		7.80697e-09	5.15092e-05	2	2	176	731333855; 731343396	731333855 [203-217]; 731343396 [205-219]		0	1434.76	42.6	17.7	76.6	102.4	50.3	78.3	136.5	223.9	121.2	150.6	Shared	High	High	High	High	High	High	High	High	High	High	High	7.602e-06	1.585e-11	3.76	26.53	Used	Used	R.AASFNIIPSSTGAAK.A	[203-217]
	FALSE	High	[R].AASFNIIPSSTGAAKAVGK.[V]		1.51976e-09	5.15092e-05	2	2	30	731333855; 731343396	731333855 [203-221]; 731343396 [205-223]		1	1789.98			2.7	2.3		75.6	463.2	388.9	11.4	56	Shared	Not Found	Not Found	Peak Found	Peak Found	Not Found	High	High	High	Peak Found	High	High	7.602e-06	2.228e-12	4.82	25.93	Used	Used	R.AASFNIIPSSTGAAKAVGK.V	[203-221]
	FALSE	High	[R].AASFNIIPSSTGAAKAVGK.[V]	1xGG [K15]	3.39472e-08	5.15092e-05	2	2	6	731333855; 731343396	731333855 [203-221]; 731343396 [205-223]		1	1904.02	15.6	9	29	12.2	5.3	22.4	211.8	148.8	360.4	185.6	Shared	Peak Found	Peak Found	Peak Found	Peak Found	Peak Found	Peak Found	High	High	High	High	High	7.602e-06	9.289e-11	4.76	18.47	Used	Used	R.AASFNIIPSSTGAAKAVGK.V	[203-221]
	FALSE	High	[K].AATYEDIK.[A]		0.00077648	5.15092e-05	1	1	38	731333855	731333855 [254-261]		0	910.452	83.2	70.7	413	230	31.2	24.2	32.4	54.2	52.2	8.9		High	High	High	High	High	High	High	High	High	High	High	7.602e-06	1.566e-05	1.94	9.44	Used	Used	K.AATYEDIK.A	[254-261]
	FALSE	High	[K].AATYEDIKAAIK.[A]		1.60536e-06	5.15092e-05	1	1	32	731333855	731333855 [254-265]		1	1293.7	51.2	99.1	48	106	13.8	254.7	109.8	51.2	109.9	156.2		High	High	High	High	High	High	High	High	High	High	High	7.602e-06	9.445e-09	3.34	19.26	Used	Used	K.AATYEDIKAAIK.A	[254-265]
	FALSE	High	[K].AATYEDIKAAIK.[A]	1xGG [K8]	0.0433294	0.00101231	1	1	1	731333855	731333855 [254-265]		1	1407.75							232.8	103.4	552.8	111		Not Found	Not Found	Not Found	Not Found	Not Found	Not Found	Peak Found	Peak Found	High	Peak Found	High	0.00017	0.001826	1.46	20.49	Used	Used	K.AATYEDIKAAIK.A	[254-265]
	FALSE	High	[K].AATYEDIKAAIKAESEGK.[M]		4.34874e-12	5.15092e-05	1	1	176	731333855	731333855 [254-271]		2	1894.98	31.6	40.6	18.9	33.6	47.7	222.9	135.5	179.1	129.5	160.6		High	High	High	High	High	High	High	High	High	High	High	7.602e-06	2.509e-15	4.92	28.27	Used	Used	K.AATYEDIKAAIKAESEGK.M	[254-271]
	FALSE	High	[K].AESEGKMKGILGYTEDDVVSTDFIGDNR.[S]		0.00139058	5.15092e-05	1	1	1	731333855	731333855 [266-293]		2	3046.43			27.3	49.6	8.1	130.9		178.6	124.9	480.5		Not Found	Not Found	Peak Found	Peak Found	Peak Found	Peak Found	Not Found	Peak Found	Peak Found	High	High	7.602e-06	3.134e-05	3.27	48.96	Used	Used	K.AESEGKMKGILGYTEDDVVSTDFIGDNR.S	[266-293]
	FALSE	High	[K].AGIALNDHFAK.[L]		2.32701e-06	5.15092e-05	1	1	115	731333855	731333855 [301-311]		0	1156.61	55	51.5	58	75.9	148.3	156.4	119.1	101.6	132.5	101.8		High	High	High	High	High	High	High	High	High	High	High	7.602e-06	1.474e-08	2.63	10.19	Used	Used	K.AGIALNDHFAK.L	[301-311]
	FALSE	High	[K].AGIALNDHFAKLVSWYDNEWGYSSR.[V]		2.84683e-11	5.15092e-05	1	1	102	731333855	731333855 [301-325]		1	2899.38	2.1	3.3	14.1	1.5	1.5	403.1	264.1	130	65.1	115.1		Peak Found	Peak Found	Peak Found	Peak Found	Peak Found	High	High	High	High	High	High	7.602e-06	2.038e-14	4.32	78.3	Used	Used	K.AGIALNDHFAKLVSWYDNEWGYSSR.V	[301-325]
	FALSE	High	[K].AVGKVLPALNGK.[L]		5.48074e-05	5.15092e-05	1	1	16	731333855	731333855 [218-229]		1	1166.73	1.7					24.5	353.7	276.4	246.1	97.5		Peak Found	Not Found	Not Found	Not Found	Not Found	Peak Found	High	High	High	High	High	7.602e-06	6.566e-07	3.38	15.08	Used	Used	K.AVGKVLPALNGK.L	[218-229]
	FALSE	High	[K].DAPMFVVGVNEHEYK.[S]		2.76672e-08	5.15092e-05	1	1	38	731333855	731333855 [129-143]		0	1734.82	153.4	195.3	43.2	134.7	328.4	21.2	3.2	25.9	37.8	56.9		High	High	High	High	High	Peak Found	Peak Found	High	High	High	High	7.602e-06	7.254e-11	4.1	106.16	Used	Used	K.DAPMFVVGVNEHEYK.S	[129-143]
	FALSE	High	[K].DAPMFVVGVNEHEYK.[S]	1xOxidation [M4]	0.0044841	0.000100671	1	1	2	731333855	731333855 [129-143]		0	1750.81	493.6	219.5	37.1	178.4	18.2		9.4	12.1	31.7			High	Peak Found	Peak Found	High	Peak Found	Not Found	Peak Found	Peak Found	Peak Found	Not Found	High	1.369e-05	0.0001243	1.89	93.35	Used	Used	K.DAPMFVVGVNEHEYK.S	[129-143]
	FALSE	High	[K].DAPMFVVGVNEHEYKSDLHIVSNASCTTNCLAPLAK.[V]	2xCarbamidomethyl [C26; C30]	1.89762e-05	5.15092e-05	1	1	4	731333855	731333855 [129-164]		1	3987.9	332.4	238		43.9	28.6	82.3	134.4	25.6	9	105.8		High	High	Not Found	Peak Found	Peak Found	Peak Found	Peak Found	Peak Found	Peak Found	High	High	7.602e-06	1.835e-07	2.81	110.41	Used	Used	K.DAPMFVVGVNEHEYKSDLHIVSNASCTTNCLAPLAK.V	[129-164]
	FALSE	High	[R].DDVELVAVNDPFITTDYMTYMFK.[Y]		1.4744e-09	5.15092e-05	1	1	22	731333855	731333855 [26-48]		0	2727.26	339.8	172.4	58.2	268.9	90	9.2	8.2	4.3	36.6	12.6		High	High	High	High	High	Peak Found	Peak Found	Peak Found	High	High	High	7.602e-06	2.142e-12	4.66	100.84	Used	Used	R.DDVELVAVNDPFITTDYMTYMFK.Y	[26-48]
	FALSE	High	[R].DDVELVAVNDPFITTDYMTYMFK.[Y]	1xOxidation [M]	9.59585e-06	5.15092e-05	1	1	3	731333855	731333855 [26-48]		0	2743.25	135.6				691.2		121.2	19.7	32.2			Peak Found	Not Found	Not Found	High	High	Not Found	Peak Found	Peak Found	Peak Found	Not Found	High	7.602e-06	8.103e-08	3.48	105.12	Used	Used	R.DDVELVAVNDPFITTDYMTYMFK.Y	[26-48]
	FALSE	High	[K].FGIVEGLMTTVHSITATQK.[T]		8.08936e-13	5.15092e-05	1	1	165	731333855	731333855 [170-188]		0	2033.07	169.4	278.9	102.5	69	45.7	110.5	45.1	51.8	35.8	91.3		High	High	High	High	High	High	High	High	High	High	High	7.602e-06	3.839e-16	5.8	116.34	Used	Used	K.FGIVEGLMTTVHSITATQK.T	[170-188]
	FALSE	High	[K].FGIVEGLMTTVHSITATQK.[T]	1xOxidation [M8]	1.72866e-09	5.15092e-05	1	1	42	731333855	731333855 [170-188]		0	2049.07	95.8	157.2	85	90.7	165.6	260.7	43.4	31.8	48.4	21.4		High	High	High	High	High	High	High	High	High	High	High	7.602e-06	2.607e-12	4.08	110.38	Used	Used	K.FGIVEGLMTTVHSITATQK.T	[170-188]
	FALSE	High	[K].FGIVEGLMTTVHSITATQKTVDGPSAK.[D]		7.45565e-10	5.15092e-05	1	1	3	731333855	731333855 [170-196]		1	2788.45											No Quan Values	Not Found	Not Found	Not Found	Not Found	Not Found	High	Not Found	High	Not Found	High	High	7.602e-06	9.449e-13	4.82		Not Used	Not Used	K.FGIVEGLMTTVHSITATQKTVDGPSAK.D	[170-196]
	FALSE	High	[R].GGRAASFNIIPSSTGAAK.[A]		2.3805e-06	5.15092e-05	2	2	2	731333855; 731343396	731333855 [200-217]; 731343396 [202-219]		1	1704.9						115.9	340.4	135.4		408.3	Shared	Not Found	Not Found	Not Found	Not Found	Not Found	Peak Found	High	Peak Found	Not Found	High	High	7.602e-06	1.517e-08	3.22	22.3	Used	Used	R.GGRAASFNIIPSSTGAAK.A	[200-217]
	FALSE	High	[R].GGRAASFNIIPSSTGAAKAVGK.[V]		0.0937379	0.00251666	2	2	1	731333855; 731343396	731333855 [200-221]; 731343396 [202-223]		2	2060.12											No Quan Values	Not Found	Not Found	Not Found	Not Found	Not Found	Not Found	Not Found	High	Not Found	Not Found	High	0.0003605	0.005921	1.76		Not Used	Not Used	R.GGRAASFNIIPSSTGAAKAVGK.V	[200-221]
	FALSE	High	[K].GILGYTEDDVVSTDFIGDNR.[S]		1.68684e-12	5.15092e-05	2	2	140	731333855; 731343396	731333855 [274-293]; 731343396 [276-295]		0	2186.02	88.3	60.6	74.5	109	149.6	57.5	96.1	118.9	84.2	161.3	Shared	High	High	High	High	High	High	High	High	High	High	High	7.602e-06	8.721e-16	3.48	59.87	Used	Used	K.GILGYTEDDVVSTDFIGDNR.S	[274-293]
	FALSE	High	[K].GILGYTEDDVVSTDFIGDNRSSIFDAK.[A]		4.37667e-14	5.15092e-05	2	2	12	731333855; 731343396	731333855 [274-300]; 731343396 [276-302]		1	2934.4	0.1	0.2		0.5		208.8	323.6	296.8	138.1	31.9	Shared	Peak Found	Peak Found	Not Found	Peak Found	Not Found	High	High	High	High	High	High	7.602e-06	1.492e-17	8.05	65.04	Used	Used	K.GILGYTEDDVVSTDFIGDNRSSIFDAK.A	[274-300]
	FALSE	High	[K].KVVISAPSK.[D]		4.63933e-05	5.15092e-05	2	2	39	731333855; 731343396	731333855 [120-128]; 731343396 [122-130]		1	928.583	184.1	121.5	340.4	191.6	45.9	74.1	14.8	4.6	4.8	18.1	Shared	High	High	High	High	High	Peak Found	Peak Found	Peak Found	Peak Found	Peak Found	High	7.602e-06	5.339e-07	2.57	88.65	Used	Used	K.KVVISAPSK.D	[120-128]
	FALSE	High	[K].KVVISAPSKDAPMFVVGVNEHEYK.[S]		2.58132e-10	5.15092e-05	1	1	50	731333855	731333855 [120-143]		2	2644.38	171.5	186.3	53.6	71.7	110.9	138.1	41.7	49.7	48.9	127.5		High	High	High	High	High	High	High	High	High	High	High	7.602e-06	2.655e-13	5.46	101.9	Used	Used	K.KVVISAPSKDAPMFVVGVNEHEYK.S	[120-143]
	FALSE	High	[K].KVVISAPSKDAPMFVVGVNEHEYK.[S]	1xOxidation [M13]	0.00122276	5.15092e-05	1	1	3	731333855	731333855 [120-143]		2	2660.38	178.6	58.9		174.7	407.1	165.3	15.4					Peak Found	Peak Found	Not Found	High	Peak Found	High	Peak Found	Not Found	Not Found	Not Found	High	7.602e-06	2.689e-05	2.06	107.91	Used	Used	K.KVVISAPSKDAPMFVVGVNEHEYK.S	[120-143]
	FALSE	High	[R].LEKAATYEDIK.[A]	1xGG [K3]	0.0285824	0.000768303	1	1	1	731333855	731333855 [251-261]		1	1394.72				1000								Not Found	Not Found	Not Found	High	Not Found	Not Found	Not Found	Not Found	Not Found	Not Found	High	0.0001279	0.001068	1.83	11.81	Used	Used	R.LEKAATYEDIK.A	[251-261]
	FALSE	High	[K].IGINGFGR.[I]		0.00215608	0.000100671	3	3	26	731363395; 731333855; 731343396	731363395 [87-94]; 731333855 [6-13]; 731343396 [8-15]		0	833.463	71.7	46.5	150.7	177.3	15.1	101.1	65.1	116.1	120.9	135.5	Shared	High	High	High	High	High	High	High	High	High	High	High	1.369e-05	5.298e-05	1.29	21.82	Used	Used	K.IGINGFGR.I	[6-13]
	FALSE	High	[K].IKIGINGFGR.[I]		0.000600262	5.15092e-05	3	3	19	731363395; 731333855; 731343396	731363395 [85-94]; 731333855 [4-13]; 731343396 [6-15]		1	1074.64		94.1	19.1	30.7	379.6	18.1	67.4	63.4	156.1	171.5	Shared	Not Found	High	Peak Found	High	High	Peak Found	High	High	High	High	High	7.602e-06	1.159e-05	2.74	108.53	Used	Used	K.IKIGINGFGR.I	[4-13]
	FALSE	High	[K].LTGMAFR.[V]		0.00336664	0.000100671	2	2	68	731363395; 731333855	731363395 [310-316]; 731333855 [230-236]		0	795.418	90.9	59.1	153.2	165.6	27.6	166.4	61.8	98.3	108.9	68.2	Shared	High	High	High	High	High	High	High	High	High	High	High	1.369e-05	8.898e-05	1.95	10.47	Used	Used	K.LTGMAFR.V	[230-236]
	FALSE	High	[K].LTGMAFR.[V]	1xOxidation [M4]	0.0129267	0.000333165	2	2	14	731363395; 731333855	731363395 [310-316]; 731333855 [230-236]		0	811.413	23.6	155.9	315.9	165.2	39.1	28.4	72	66.2	121.8	12.1	Shared	Peak Found	Peak Found	High	High	High	Peak Found	Peak Found	Peak Found	High	Peak Found	High	6.62e-05	0.0004164	1.77	9.92	Used	Used	K.LTGMAFR.V	[230-236]
	FALSE	High	[K].LTGMAFRVPTVDVSVVDLTVR.[L]		4.81297e-07	5.15092e-05	1	1	3	731333855	731333855 [230-250]		1	2275.25						444.3	165	113.1	172.4	105.2		Not Found	Not Found	Not Found	Not Found	Not Found	High	High	Peak Found	Peak Found	High	High	7.602e-06	2.241e-09	3.88	65.23	Used	Used	K.LTGMAFRVPTVDVSVVDLTVR.L	[230-250]
	FALSE	High	[K].LTGMAFRVPTVDVSVVDLTVRLEK.[A]		5.79276e-14	5.15092e-05	1	1	6	731333855	731333855 [230-253]		2	2645.47	35.3					185.9	110.3	220.9	411.5	36		Peak Found	Not Found	Not Found	Not Found	Not Found	Peak Found	High	High	High	High	High	7.602e-06	2.035e-17	4.56	67.28	Used	Used	K.LTGMAFRVPTVDVSVVDLTVRLEK.A	[230-253]
	FALSE	High	[K].LVSWYDNEWGYSSR.[V]		3.39272e-09	5.15092e-05	2	2	301	731333855; 731343396	731333855 [312-325]; 731343396 [314-327]		0	1761.79	96.5	86.1	84.4	139.4	221.6	90.6	75.2	58.7	79.4	68.1	Shared	High	High	High	High	High	High	High	High	High	High	High	7.602e-06	5.823e-12	2.64	47.69	Used	Used	K.LVSWYDNEWGYSSR.V	[312-325]
	FALSE	High	[K].LVSWYDNEWGYSSR.[V]	1xPhospho [D/E/S/Y]	0.0511497	0.00117455	2	2	8	731333855; 731343396	731333855 [312-325]; 731343396 [314-327]	731333855 1xPhospho [E/D/S/Y]; 731343396 1xPhospho [E/D/S/Y]	0	1841.75						591.2	67.3	113	76.2	152.3	Shared	Not Found	Not Found	Not Found	Not Found	Not Found	High	Peak Found	Peak Found	Peak Found	High	High	0.0001881	0.002313	1.48	49.23	Used	Used	K.LVSWYDNEWGYSSR.V	[312-325]
	FALSE	High	[-].MAKIKIGINGFGR.[I]	1xMet-loss [N-Term]	0.000800351	5.15092e-05	1	1	8	731333855	731333855 [1-13]	731333855 1xMet-loss [N-Term]	2	1273.77	31.1	18.8	76.6	41.5	57.3	55	215.9	214.9	135.7	153.3		Peak Found	Peak Found	Peak Found	Peak Found	Peak Found	Peak Found	High	High	High	High	High	7.602e-06	1.625e-05	2.75	11.29	Used	Used	-.MAKIKIGINGFGR.I	[1-13]
	FALSE	High	[K].MKGILGYTEDDVVSTDFIGDNR.[S]		4.44349e-14	5.15092e-05	1	1	40	731333855	731333855 [272-293]		1	2445.16	5.7	36.5	22.3	6.2	12.8	86.7	190.3	268.2	144.8	226.5		Peak Found	High	Peak Found	High	High	High	High	High	High	High	High	7.602e-06	1.51e-17	4.44	56.56	Used	Used	K.MKGILGYTEDDVVSTDFIGDNR.S	[272-293]
	FALSE	High	[K].MKGILGYTEDDVVSTDFIGDNR.[S]	1xOxidation [M1]	6.81172e-09	5.15092e-05	1	1	19	731333855	731333855 [272-293]		1	2461.16	22.9	15.3		49	56.9	282.6	120	114	153.9	185.4		Peak Found	Peak Found	Not Found	High	Peak Found	High	High	High	High	High	High	7.602e-06	1.345e-11	4.52	47.73	Used	Used	K.MKGILGYTEDDVVSTDFIGDNR.S	[272-293]
	FALSE	High	[K].MKGILGYTEDDVVSTDFIGDNRSSIFDAK.[A]		6.48231e-16	5.15092e-05	1	1	18	731333855	731333855 [272-300]		2	3193.54						1.7	388.2	401.1	124	85.1		Not Found	Not Found	Not Found	Not Found	Not Found	Peak Found	High	High	High	High	High	7.602e-06	1.362e-19	6.86	59.65	Used	Used	K.MKGILGYTEDDVVSTDFIGDNRSSIFDAK.A	[272-300]
	FALSE	High	[K].MKGILGYTEDDVVSTDFIGDNRSSIFDAK.[A]	1xOxidation [M1]	1.18496e-07	5.15092e-05	1	1	4	731333855	731333855 [272-300]		2	3209.53						175.5	173.3	334.3	31.5	285.5		Not Found	Not Found	Not Found	Not Found	Not Found	Peak Found	High	High	High	High	High	7.602e-06	4.134e-10	4.68	58.58	Used	Used	K.MKGILGYTEDDVVSTDFIGDNRSSIFDAK.A	[272-300]
	FALSE	High	[R].NPEEIPWSQTGADFVVESTGVFTDKDK.[A]		6.15471e-14	5.15092e-05	1	1	79	731333855	731333855 [83-109]		1	2996.42	186.7	163.8	63.9	185.4	219.8	81.8	21.7	24.9	24	27.9		High	High	High	High	High	High	High	High	High	High	High	7.602e-06	2.179e-17	5.75	109.1	Used	Used	R.NPEEIPWSQTGADFVVESTGVFTDKDK.A	[83-109]
	FALSE	High	[R].NPEEIPWSQTGADFVVESTGVFTDKDKAAAHLK.[G]		2.82368e-12	5.15092e-05	1	1	30	731333855	731333855 [83-115]		2	3587.77	74.4	120.3	7.4	23.1	11.5	342.2	59.7	134.5	84	143		High	High	Peak Found	High	Peak Found	High	High	High	High	High	High	7.602e-06	1.546e-15	8.3	59.38	Used	Used	R.NPEEIPWSQTGADFVVESTGVFTDKDKAAAHLK.G	[83-115]
	FALSE	High	[K].SDLHIVSNASCTTNCLAPLAK.[V]	2xCarbamidomethyl [C11; C15]	9.36376e-09	5.15092e-05	1	1	47	731333855	731333855 [144-164]		0	2272.11	171.6	103.2	84.2	155.3	69.3	37.3	98.7	90	62.8	127.6		High	High	High	High	High	High	High	High	High	High	High	7.602e-06	1.983e-11	5.25	28.29	Used	Used	K.SDLHIVSNASCTTNCLAPLAK.V	[144-164]
	FALSE	High	[R].SSIFDAK.[A]		0.00274577	0.000100671	3	3	139	731363395; 731333855; 731343396	731363395 [374-380]; 731333855 [294-300]; 731343396 [296-302]		0	767.393	34.6	28.8	300.4	87.4	20.4	110.6	115.1	117.3	140.6	44.7	Shared	High	High	High	High	High	High	High	High	High	High	High	1.369e-05	7.043e-05	2.08	10.66	Used	Used	R.SSIFDAK.A	[294-300]
	FALSE	High	[R].SSIFDAKAGIALNDHFAK.[L]		9.73099e-08	5.15092e-05	1	1	6	731333855	731333855 [294-311]		1	1904.99						72.4	263.3	185	120.3	359		Not Found	Not Found	Not Found	Not Found	Not Found	Peak Found	Peak Found	High	High	High	High	7.602e-06	3.289e-10	2.93	34.93	Used	Used	R.SSIFDAKAGIALNDHFAK.L	[294-311]
	FALSE	High	[K].TLLFGEKPVSVFGCR.[N]	1xCarbamidomethyl [C14]	8.55001e-09	5.15092e-05	1	1	298	731333855	731333855 [68-82]		0	1709.9	228.2	230.1	82.7	175.6	39.6	70.5	31.2	35.8	54.9	51.5		High	High	High	High	High	High	High	High	High	High	High	7.602e-06	1.777e-11	3.45	109.19	Used	Used	K.TLLFGEKPVSVFGCR.N	[68-82]
	FALSE	High	[K].TLLFGEKPVSVFGCRNPEEIPWSQTGADFVVESTGVFTDKDK.[A]	1xCarbamidomethyl [C14]	2.80896e-08	5.15092e-05	1	1	20	731333855	731333855 [68-109]		2	4687.3	6.5	61.7	95.1	28.1		207.5	193	79.6	196.2	132.3		Peak Found	High	High	High	Not Found	High	High	High	High	High	High	7.602e-06	7.383e-11	6.82	107.92	Used	Used	K.TLLFGEKPVSVFGCRNPEEIPWSQTGADFVVESTGVFTDKDK.A	[68-109]
	FALSE	High	[K].TVDGPSAKDWR.[G]		1.88221e-06	5.15092e-05	1	1	39	731333855	731333855 [189-199]		1	1231.61	0.5	0.8	0.7	0.9	0	245.2	255.5	150.1	199.7	146.5		Peak Found	Peak Found	Peak Found	Peak Found	Peak Found	High	High	High	High	High	High	7.602e-06	1.149e-08	3.11	8.56	Used	Used	K.TVDGPSAKDWR.G	[189-199]
	FALSE	High	[K].TVDGPSAKDWR.[G]	1xGG [K8]	0.0063404	0.000145442	1	1	1	731333855	731333855 [189-199]		1	1345.65	32			220.1		61.6	220.6		320.9	144.8		Peak Found	Not Found	Not Found	Peak Found	Not Found	Peak Found	Peak Found	Not Found	Peak Found	High	High	3.22e-05	0.0001853	1.92	11.63	Used	Used	K.TVDGPSAKDWR.G	[189-199]
	FALSE	High	[K].TVDGPSAKDWRGGR.[A]		3.20063e-05	5.15092e-05	1	1	6	731333855	731333855 [189-202]		2	1501.75	5.3	8.1	4.1	2.8	2	118.6	238.8	489.7	46.7	83.9		Peak Found	Peak Found	Peak Found	Peak Found	Peak Found	High	High	High	High	High	High	7.602e-06	3.445e-07	2.96	11.11	Used	Used	K.TVDGPSAKDWRGGR.A	[189-202]
	FALSE	High	[K].VKDEKTLLFGEKPVSVFGCR.[N]	1xCarbamidomethyl [C19]; 1xGG [K/T]	0.119649	0.00355074	1	1	3	731333855	731333855 [63-82]		2	2423.28									1000			Not Found	Not Found	Not Found	Not Found	Not Found	Not Found	Not Found	Not Found	High	Not Found	High	0.0005013	0.008947	1.07	28.64	Used	Used	K.VKDEKTLLFGEKPVSVFGCR.N	[63-82]
	FALSE	High	[R].VILQRDDVELVAVNDPFITTDYMTYMFK.[Y]		8.87489e-10	5.15092e-05	1	1	23	731333855	731333855 [21-48]		1	3336.65	172.6	260.6	17.4	47.9	45.7	184.3	72.6	47.8	111.2	40.1		High	High	Peak Found	High	Peak Found	High	High	High	High	High	High	7.602e-06	1.172e-12	5.91	114.55	Used	Used	R.VILQRDDVELVAVNDPFITTDYMTYMFK.Y	[21-48]
	FALSE	High	[K].VINDKFGIVEGLMTTVHSITATQK.[T]		9.4455e-20	5.15092e-05	1	1	113	731333855	731333855 [165-188]		1	2602.39	105.4	43.3	92.5	76.3	10.6	247.1	77.2	78	98.3	171.3		High	High	High	High	High	High	High	High	High	High	High	7.602e-06	7.161e-24	6.21	103.78	Used	Used	K.VINDKFGIVEGLMTTVHSITATQK.T	[165-188]
	FALSE	High	[K].VINDKFGIVEGLMTTVHSITATQK.[T]	1xOxidation [M13]	4.31085e-14	5.15092e-05	1	1	34	731333855	731333855 [165-188]		1	2618.39	26	77	40.1	29	128.5	529.3	56.6	34	15	64.5		High	High	High	High	High	High	High	High	High	High	High	7.602e-06	1.461e-17	8.25	75.81	Used	Used	K.VINDKFGIVEGLMTTVHSITATQK.T	[165-188]
	FALSE	High	[K].VINDKFGIVEGLMTTVHSITATQKTVDGPSAK.[D]		1.27523e-11	5.15092e-05	1	1	13	731333855	731333855 [165-196]		2	3357.77	118.9	32.7	105.4	18.2	149.1	99.9	249.6	72.2	77.9	76.1		Peak Found	Peak Found	High	Peak Found	Peak Found	High	High	High	High	High	High	7.602e-06	8.322e-15	4.79	102.99	Used	Used	K.VINDKFGIVEGLMTTVHSITATQKTVDGPSAK.D	[165-196]
	FALSE	High	[K].VINDKFGIVEGLMTTVHSITATQKTVDGPSAK.[D]	1xOxidation [M13]	4.39971e-05	5.15092e-05	1	1	2	731333855	731333855 [165-196]		2	3373.77				25.2			776	198.8				Not Found	Not Found	Not Found	Peak Found	Not Found	Not Found	High	High	Not Found	Not Found	High	7.602e-06	5.024e-07	3.1	64.35	Used	Used	K.VINDKFGIVEGLMTTVHSITATQKTVDGPSAK.D	[165-196]
	FALSE	High	[K].VLPALNGK.[L]		0.0108843	0.000239412	1	1	38	731333855	731333855 [222-229]		0	811.504	54.5	18.9	192.4	126.4	6.4	82.6	142.9	124.5	167	84.4		High	High	High	High	Peak Found	High	High	High	High	High	High	5.511e-05	0.0003404	1.24	9.81	Used	Used	K.VLPALNGK.L	[222-229]
	FALSE	High	[K].VLPALNGKLTGMAFR.[V]		2.43662e-05	5.15092e-05	1	1	1	731333855	731333855 [222-236]		1	1587.9				40.1		348.5	60.5			551		Not Found	Not Found	Not Found	Peak Found	Not Found	Peak Found	Peak Found	Not Found	Not Found	High	High	7.602e-06	2.473e-07	2.91	44.85	Used	Used	K.VLPALNGKLTGMAFR.V	[222-236]
	FALSE	High	[R].VPTVDVSVVDLTVR.[L]		2.58284e-09	5.15092e-05	2	2	91	731333855; 731343396	731333855 [237-250]; 731343396 [239-252]		0	1498.85	168.7	75.8	161.5	182.4	287.1	22	20.9	16.9	26.6	38.1	Shared	High	High	High	High	High	High	High	High	High	High	High	7.602e-06	4.218e-12	3.46	93.67	Used	Used	R.VPTVDVSVVDLTVR.L	[237-250]
	FALSE	High	[R].VPTVDVSVVDLTVRLEK.[AE]		1.18149e-12	5.15092e-05	2	2	19	731333855; 731343396	731333855 [237-253]; 731343396 [239-255]		1	1869.07	212.3	122	20.2	49.4	372.6	34.6	20.5	47.8	60.8	59.8	Shared	High	High	High	Peak Found	High	High	High	Peak Found	High	High	High	7.602e-06	5.855e-16	6.59	110.96	Used	Used	R.VPTVDVSVVDLTVRLEK.A	[237-253]
	FALSE	High	[R].VVDLIVHMSK.[T]		4.39727e-06	5.15092e-05	1	1	51	731333855	731333855 [326-335]		0	1140.64	195	322	3.1	100.2	192.5	17.3	23.5	31.2	33.8	81.5		High	High	High	High	High	High	High	High	High	High	High	7.602e-06	3.184e-08	2.96	96.2	Used	Used	R.VVDLIVHMSK.T	[326-335]
	FALSE	High	[R].VVDLIVHMSK.[T]	1xOxidation [M8]	6.67036e-06	5.15092e-05	1	1	30	731333855	731333855 [326-335]		0	1156.64	73.6	109.4	121.3	145.3	290.8	168.8	2.8	11.2	33.7	43		High	High	High	High	High	High	Peak Found	Peak Found	High	High	High	7.602e-06	5.232e-08	2.05	105.22	Used	Used	R.VVDLIVHMSK.T	[326-335]
	FALSE	High	[R].VVDLIVHMSKTE.[-]		3.89071e-08	5.15092e-05	1	1	63	731333855	731333855 [326-337]		1	1370.73	33.8	44.2	1.9	8.6	32.5	46.8	188.2	202.1	189.4	252.5		High	High	Peak Found	High	High	High	High	High	High	High	High	7.602e-06	1.093e-10	3.67	23.91	Used	Used	R.VVDLIVHMSKTE.-	[326-337]
	FALSE	High	[R].VVDLIVHMSKTE.[-]	1xOxidation [M8]	3.3242e-05	5.15092e-05	1	1	16	731333855	731333855 [326-337]		1	1386.73	254.2		40.4	56		265.8	35.7	102.6	99	146.2		High	Not Found	Peak Found	Peak Found	Not Found	High	High	High	High	High	High	7.602e-06	3.606e-07	1.87	92.8	Used	Used	R.VVDLIVHMSKTE.-	[326-337]
	FALSE	High	[K].VVISAPSK.[D]		0.00368572	0.000100671	2	2	18	731333855; 731343396	731333855 [121-128]; 731343396 [123-130]		0	800.488	88.6	19.2	456.8	274.9	66	16	10.3	27	28.1	13	Shared	High	High	High	High	High	Peak Found	Peak Found	Peak Found	High	High	High	1.369e-05	9.925e-05	1.6	9.26	Used	Used	K.VVISAPSK.D	[121-128]
	FALSE	High	[K].VVISAPSKDAPMFVVGVNEHEYK.[S]		2.70296e-09	5.15092e-05	1	1	12	731333855	731333855 [121-143]		1	2516.29	89.2	250	45.4	120.2	279.4	15.3	40.4	26.5	4.6	129.1		High	High	Peak Found	High	High	High	Peak Found	High	Peak Found	High	High	7.602e-06	4.466e-12	4.27	109.57	Used	Used	K.VVISAPSKDAPMFVVGVNEHEYK.S	[121-143]
	FALSE	High	[K].YDSVHGQWK.[H]		1.6683e-05	5.15092e-05	1	1	43	731333855	731333855 [49-57]		0	1119.52	137.4	133.1	273.9	203.3	27.2	117.5	18.7	24.7	53.2	11		High	High	High	High	High	High	High	High	High	High	High	7.602e-06	1.575e-07	1.73	8.1	Used	Used	K.YDSVHGQWK.H	[49-57]
FALSE		High	Master Protein	8771575436459987600	3534	731329677	PREDICTED: putative aconitate hydratase, cytoplasmic [Beta vulgaris subsp. vulgaris]	MIAGAAKSSLSSSSSSTSLSPLLRAARHRFVTTLSSPSISSSSSASSYSPSSRIFSAFRSHPVAGHRSLGFSSVIRSISSASSRWSHGVDWRSPVSLRSQIAASPPLVERFQRKIATMASEHPYKEIFTSLPKPGGGEFGKFYSLPALNDPRVEKLPYSIRILLESAIRNCDGFQVTKDDVEKIIDWENSAPKLVEIPFKPARVLLQDFTGVPAVVDLAAMRDAMKNLNSDPNKINPLVPVDLVIDHSVQVDVARSENAVQANMEFEFKRNGERFGFLKWGSTAFQNMLVVPPGSGIVHQVNLEYLGRVVFNNGGLLYPDSVVGTDSHTTMIDGLGVAGWGVGGIEAEATMLGQPMSMVLPGVVGFKMTGKLRDGVTATDLVLTATQMLRKHGVVGKFV…	>gi|731329677|ref|XP_010675721.1| PREDICTED: putative aconitate hydratase, cytoplasmic [Beta vulgaris subsp. vulgaris]	0	1063.44	69	76	1616	76	76	1015	110.4	7.17	3096.39	69	1616	76	0	105.8	101.8	79.8	100	117.4	92.7	94.4	98.2	107.3	102.6	8.38312e+08	6.63751e+08	3.73062e+08	6.02183e+08	1.22527e+09	3.25455e+08	7.35039e+08	8.393e+08	1.07236e+09	1.75528e+09	1.80948e+09	1.74183e+09	1.3652e+09	1.71101e+09	2.009e+09
	Checked	Confidence	Annotated Sequence	Modifications	Qvality PEP	Qvality q-value	# Protein Groups	# Proteins	# PSMs	Master Protein Accessions	Positions in Master Proteins	Modifications in Master Proteins	# Missed Cleavages	Theo. MH+ [Da]	Abundances (Scaled): F1: Control	Abundances (Scaled): F2: Control	Abundances (Scaled): F3: Control	Abundances (Scaled): F4: Control	Abundances (Scaled): F5: Control	Abundances (Scaled): F6: Sample	Abundances (Scaled): F7: Sample	Abundances (Scaled): F8: Sample	Abundances (Scaled): F9: Sample	Abundances (Scaled): F10: Sample	Quan Info	Found in Sample: [S1] F1: Control	Found in Sample: [S2] F2: Control	Found in Sample: [S3] F3: Control	Found in Sample: [S4] F4: Control	Found in Sample: [S5] F5: Control	Found in Sample: [S6] F6: Sample	Found in Sample: [S7] F7: Sample	Found in Sample: [S8] F8: Sample	Found in Sample: [S9] F9: Sample	Found in Sample: [S10] F10: Sample	Confidence (by Search Engine): Sequest HT	Percolator q-Value (by Search Engine): Sequest HT	Percolator PEP (by Search Engine): Sequest HT	XCorr (by Search Engine): Sequest HT	Top Apex RT [min]	Quan Usage	Quan Ratio Usage	Sequence in Protein	Positions in Proteins
	FALSE	High	[K].AGEDADTLGLTGHER.[Y]		3.31064e-12	5.15092e-05	1	1	35	731329677	731329677 [942-956]		0	1541.72	43.1	52.3	81.4	129.1	14.9	157.4	107.4	93.3	164	157.2		High	High	High	High	High	High	High	High	High	High	High	7.602e-06	1.847e-15	4.92	13.96	Used	Used	K.AGEDADTLGLTGHER.Y	[942-956]
	FALSE	High	[R].ANKMFVDYNEPQQER.[V]		0.000759045	5.15092e-05	1	1	4	731329677	731329677 [460-474]		1	1868.86						26.7	225.5	283.7	298.9	165.2		Not Found	Not Found	Not Found	Not Found	Not Found	Peak Found	High	High	High	High	High	7.602e-06	1.53e-05	3.08	16.5	Used	Used	R.ANKMFVDYNEPQQER.V	[460-474]
	FALSE	High	[R].ANYLASPPLVVAYALAGTVDIDFEKEPIGTGKDGK.[S]		9.06826e-12	5.15092e-05	1	1	9	731329677	731329677 [669-703]		2	3619.89				32.5		449.2	62.2	277.7	77.1	101.3		Not Found	Not Found	Not Found	High	Not Found	High	High	High	High	High	High	7.602e-06	5.706e-15	5.38	101.99	Used	Used	R.ANYLASPPLVVAYALAGTVDIDFEKEPIGTGKDGK.S	[669-703]
	FALSE	High	[K].ASELGLEVKPWVK.[T]		3.9249e-06	5.15092e-05	1	1	16	731329677	731329677 [577-589]		0	1455.82	91.6	189.1	19.8	68.6	232.9	32.4	96.1	56.8	95.7	117.1		High	High	Peak Found	High	High	Peak Found	High	High	High	High	High	7.602e-06	2.766e-08	4.07	107.74	Used	Used	K.ASELGLEVKPWVK.T	[577-589]
	FALSE	High	[R].ATIANMSPEYGATMGFFPVDHVTLEYLK.[L]		5.74903e-14	5.15092e-05	1	1	14	731329677	731329677 [415-442]		0	3102.5	171.3	155.7	62.6	113.6	7	47.4	120.7	72.2	111	138.5		High	High	High	High	High	Peak Found	High	High	High	High	High	7.602e-06	2.018e-17	6.14	76.78	Used	Used	R.ATIANMSPEYGATMGFFPVDHVTLEYLK.L	[415-442]
	FALSE	High	[R].ATIANMSPEYGATMGFFPVDHVTLEYLK.[L]	1xOxidation [M]	1.65475e-06	5.15092e-05	1	1	7	731329677	731329677 [415-442]		0	3118.49	66.8	24.3	63.1	60.5	223	101.4	129.9	99.4	172.7	58.8		High	High	Peak Found	High	High	High	Peak Found	Peak Found	Peak Found	Peak Found	High	7.602e-06	9.799e-09	3.58	108.65	Used	Used	R.ATIANMSPEYGATMGFFPVDHVTLEYLK.L	[415-442]
	FALSE	High	[K].DAYCLLNFGDSITTDHISPAGSIHK.[D]	1xCarbamidomethyl [C4]	1.45222e-09	5.15092e-05	1	1	7	731329677	731329677 [785-809]		0	2732.3	170.1	282.1	5.3	179.6	341.1	5.4	2.5	2.9	5.7	5.2		High	High	Peak Found	High	High	Peak Found	Peak Found	Peak Found	Peak Found	High	High	7.602e-06	2.103e-12	5.68	109.12	Used	Used	K.DAYCLLNFGDSITTDHISPAGSIHK.D	[785-809]
	FALSE	High	[K].DAYCLLNFGDSITTDHISPAGSIHKDSPAAK.[F]	1xCarbamidomethyl [C4]	5.84024e-13	5.15092e-05	1	1	17	731329677	731329677 [785-815]		1	3301.58	157.8	214.2	21.4	70.4	134.5	74.7	24.9	102.2	57.1	142.8		High	High	Peak Found	High	High	High	High	High	High	High	High	7.602e-06	2.675e-16	6.58	43.31	Used	Used	K.DAYCLLNFGDSITTDHISPAGSIHKDSPAAK.F	[785-815]
	FALSE	High	[K].DDVEKIIDWENSAPK.[L]		0.0136202	0.000333165	1	1	1	731329677	731329677 [179-193]		1	1758.85										1000		Not Found	Not Found	Not Found	Not Found	Not Found	Not Found	Not Found	Not Found	Not Found	High	High	6.62e-05	0.0004424	1.49	33.77	Used	Used	K.DDVEKIIDWENSAPK.L	[179-193]
	FALSE	High	[K].DFNSYGSR.[R]		0.00944034	0.000239412	1	1	17	731329677	731329677 [826-833]		0	945.406	71.4	24.7	297.2	94.7	18.5	125.6	82.9	115.7	108.6	60.7		High	High	High	High	High	Peak Found	Peak Found	High	Peak Found	High	High	4.984e-05	0.0002914	1.08	9.37	Used	Used	K.DFNSYGSR.R	[826-833]
	FALSE	High	[R].DGVTATDLVLTATQMLR.[K]		2.32155e-10	5.15092e-05	1	1	14	731329677	731329677 [374-390]		0	1804.95	92.6	40.1	70.9	264.1	169.9	113.5	73.3	99.5	54.1	22		High	Peak Found	High	High	Peak Found	High	High	High	High	High	High	7.602e-06	2.332e-13	4.4	100.76	Used	Used	R.DGVTATDLVLTATQMLR.K	[374-390]
	FALSE	High	[R].DGVTATDLVLTATQMLRK.[H]		1.57936e-08	5.15092e-05	1	1	1	731329677	731329677 [374-391]		1	1933.04							726.3		273.7			Not Found	Not Found	Not Found	Not Found	Not Found	Not Found	High	Not Found	Peak Found	Not Found	High	7.602e-06	3.693e-11	3.22	76.04	Used	Used	R.DGVTATDLVLTATQMLRK.H	[374-391]
	FALSE	High	[R].DIWPSNEEIAQVVQSSVLPDMFR.[S]		2.78612e-09	5.15092e-05	1	1	46	731329677	731329677 [709-731]		0	2660.3	181.4	134.4	110.4	107.3	66	76.8	53.8	77.7	106.1	86.1		High	High	High	High	High	High	High	High	High	High	High	7.602e-06	4.597e-12	1.41	103.76	Used	Used	R.DIWPSNEEIAQVVQSSVLPDMFR.S	[709-731]
	FALSE	High	[R].DIWPSNEEIAQVVQSSVLPDMFR.[S]	1xOxidation [M21]	2.39997e-05	5.15092e-05	1	1	6	731329677	731329677 [709-731]		0	2676.3	52.3	183.9	240.1	78.5	221.4	85.5	11	35.1	83.2	9		Peak Found	Peak Found	High	Peak Found	High	High	Peak Found	High	High	Peak Found	High	7.602e-06	2.424e-07	2.19	106.83	Used	Used	R.DIWPSNEEIAQVVQSSVLPDMFR.S	[709-731]
	FALSE	High	[K].DMSLNPPGPFGVK.[D]		9.03621e-05	5.15092e-05	1	1	20	731329677	731329677 [772-784]		0	1358.68	76	36.4	151.5	248.8	155.9	25.7	31.5	65.8	107	101.5		High	High	High	High	High	Peak Found	Peak Found	High	Peak Found	High	High	7.602e-06	1.191e-06	2.49	40.87	Used	Used	K.DMSLNPPGPFGVK.D	[772-784]
	FALSE	High	[K].DMSLNPPGPFGVKDAYCLLNFGDSITTDHISPAGSIHKDSPAAK.[F]	1xCarbamidomethyl [C17]	0.00155765	5.15092e-05	1	1	1	731329677	731329677 [772-815]		2	4641.24						650.3	57.4	236.4	56			Not Found	Not Found	Not Found	Not Found	Not Found	Peak Found	Peak Found	High	Peak Found	Not Found	High	7.602e-06	3.582e-05	2.74	100.28	Used	Used	K.DMSLNPPGPFGVKDAYCLLNFGDSITTDHISPAGSIHKDSPAAK.F	[772-815]
	FALSE	High	[K].EAGHQTIVLAGAEYGSGSSR.[D]		1.55561e-08	5.15092e-05	1	1	10	731329677	731329677 [883-902]		0	1989.96	110.7	40.8	125.7	270.5	52.7	22.9	117	67.2	112.5	80.1		High	Peak Found	High	High	High	High	High	Peak Found	Peak Found	Peak Found	High	7.602e-06	3.619e-11	3.19	18.27	Used	Used	K.EAGHQTIVLAGAEYGSGSSR.D	[883-902]
	FALSE	High	[K].EIFTSLPKPGGGEFGK.[F]		2.29201e-06	5.15092e-05	1	1	3	731329677	731329677 [126-141]		0	1663.87	163.2	287.7		403.2	78.9		6.6	25.7		34.8		Peak Found	High	Not Found	High	High	Not Found	Peak Found	Peak Found	Not Found	Peak Found	High	7.602e-06	1.454e-08	2.43	95.42	Used	Used	K.EIFTSLPKPGGGEFGK.F	[126-141]
	FALSE	High	[R].FDTEVELAYFDHGGILPYVIR.[Q]		2.93442e-11	5.15092e-05	1	1	36	731329677	731329677 [990-1010]		0	2454.23	445.4	129.5	62.3	118.8	76.3	41.2	45.7	11.9	45.8	22.9		High	High	High	High	High	High	High	Peak Found	High	High	High	7.602e-06	2.098e-14	2.94	103.68	Used	Used	R.FDTEVELAYFDHGGILPYVIR.Q	[990-1010]
	FALSE	High	[R].FGFLKWGSTAFQNMLVVPPGSGIVHQVNLEYLGR.[V]		8.76194e-06	5.15092e-05	1	1	2	731329677	731329677 [275-308]		1	3761.96							1000					Not Found	Not Found	Not Found	Not Found	Not Found	Not Found	High	Not Found	Not Found	Not Found	High	7.602e-06	7.253e-08	2.9	104.12	Used	Used	R.FGFLKWGSTAFQNMLVVPPGSGIVHQVNLEYLGR.V	[275-308]
	FALSE	High	[K].FLMEHGVDR.[K]		0.00030134	5.15092e-05	1	1	14	731329677	731329677 [816-824]		0	1103.53	74.8	79.3	15.9	137	6	304.2	65	50	147.5	120.3		High	High	Peak Found	High	Peak Found	High	High	High	High	High	High	7.602e-06	5.053e-06	2.53	9.5	Used	Used	K.FLMEHGVDR.K	[816-824]
	FALSE	High	[K].FLMEHGVDRK.[D]		0.000366924	5.15092e-05	1	1	25	731329677	731329677 [816-825]		1	1231.63	2.6	438.4	15.4	30.4	4.5	104.5	92.1	123	114.3	74.6		Peak Found	High	High	High	Peak Found	High	High	High	High	High	High	7.602e-06	6.417e-06	2.15	12.5	Used	Used	K.FLMEHGVDRK.D	[816-825]
	FALSE	High	[K].FLMEHGVDRK.[D]	1xOxidation [M3]	0.0016055	5.15092e-05	1	1	1	731329677	731329677 [816-825]		1	1247.62				1000								Not Found	Not Found	Not Found	High	Not Found	Not Found	Not Found	Not Found	Not Found	Not Found	High	7.602e-06	3.732e-05	2.56	8.6	Used	Used	K.FLMEHGVDRK.D	[816-825]
	FALSE	High	[K].FLMEHGVDRKDFNSYGSR.[R]		2.15722e-06	5.15092e-05	1	1	10	731329677	731329677 [816-833]		2	2158.01		6.8		13.1	4.9	82.8	216	319.5	117.3	239.6		Not Found	Peak Found	Not Found	Peak Found	Peak Found	Peak Found	High	High	High	High	High	7.602e-06	1.35e-08	3.87	19.25	Used	Used	K.FLMEHGVDRKDFNSYGSR.R	[816-833]
	FALSE	High	[K].FSFHGQPAELK.[H]		0.000500517	5.15092e-05	1	1	38	731329677	731329677 [536-546]		0	1260.64	97.3	119.9	73	77.9	371.4	95.8	41	23.6	43.4	56.8		High	High	High	High	High	High	High	High	High	High	High	7.602e-06	9.261e-06	2.67	105.2	Used	Used	K.FSFHGQPAELK.H	[536-546]
	FALSE	High	[K].FVEFHGQGVGQLSLADR.[A]		8.22252e-11	5.15092e-05	1	1	30	731329677	731329677 [398-414]		0	1859.94	136.4	154.9	53.7	42.8	223.3	44.3	72.8	75.1	67	129.7		High	High	High	High	High	High	High	High	High	High	High	7.602e-06	6.741e-14	3.92	33.38	Used	Used	K.FVEFHGQGVGQLSLADR.A	[398-414]
	FALSE	High	[K].FYSLPALNDPR.[V]		1.40152e-05	5.15092e-05	1	1	33	731329677	731329677 [142-152]		0	1292.66	177.9	106	142.7	166	107.6	41.8	36.4	48.6	63.2	109.8		High	High	High	High	High	High	Peak Found	Peak Found	High	High	High	7.602e-06	1.275e-07	1.85	37.2	Used	Used	K.FYSLPALNDPR.V	[142-152]
	FALSE	High	[K].FYSLPALNDPRVEK.[L]		0.0160472	0.000413429	1	1	2	731329677	731329677 [142-155]		1	1648.87		9.7		35.4		102.6	198	168.8	222.6	262.8		Not Found	Peak Found	Not Found	Peak Found	Not Found	Peak Found	Peak Found	Peak Found	Peak Found	High	High	7.552e-05	0.0005338	2.12	35.28	Used	Used	K.FYSLPALNDPRVEK.L	[142-155]
	FALSE	High	[K].FYSLPALNDPRVEKLPYSIR.[I]		9.60078e-05	5.15092e-05	1	1	9	731329677	731329677 [142-161]		2	2378.29	16.8	14.1	2.5	23.7	2.1	36.7	305.9	198.6	270.1	129.6		Peak Found	Peak Found	Peak Found	Peak Found	Peak Found	Peak Found	High	High	High	High	High	7.602e-06	1.283e-06	3.46	49.59	Used	Used	K.FYSLPALNDPRVEKLPYSIR.I	[142-161]
	FALSE	High	[K].GFAIPKEEQEK.[V]		0.000292347	5.15092e-05	1	1	28	731329677	731329677 [522-532]		1	1275.66	65	95.6	80.8	131.1	47.3	248.5	56.6	83	116.8	75.3		High	High	High	High	High	High	High	High	High	High	High	7.602e-06	4.856e-06	2.18	9.04	Used	Used	K.GFAIPKEEQEK.V	[522-532]
	FALSE	High	[K].GFAIPKEEQEKVAK.[F]		1.20446e-05	5.15092e-05	1	1	10	731329677	731329677 [522-535]		2	1573.86	7.5	1.8	95.3	8.1	6.4	280	167.2	86.1	180.6	167		Peak Found	Peak Found	Peak Found	Peak Found	Peak Found	High	High	High	High	High	High	7.602e-06	1.064e-07	3.65	8.8	Used	Used	K.GFAIPKEEQEKVAK.F	[522-535]
	FALSE	High	[K].GNPMWNSLEVPTGTLYQWDSK.[S]		2.28798e-09	5.15092e-05	1	1	35	731329677	731329677 [740-760]		0	2423.13	62.8	79.5	62.6	141.6	233.1	75.3	84.9	102.8	71.5	85.9		High	High	High	High	High	High	High	High	High	High	High	7.602e-06	3.627e-12	3.54	69.79	Used	Used	K.GNPMWNSLEVPTGTLYQWDSK.S	[740-760]
	FALSE	High	[K].GNPMWNSLEVPTGTLYQWDSK.[S]	1xOxidation [M4]	3.29911e-05	5.15092e-05	1	1	6	731329677	731329677 [740-760]		0	2439.13	8	141.7	37.5	78.3	250.8	198.7	172.9		42.9	69.3		Peak Found	High	Peak Found	High	High	High	High	Not Found	Peak Found	High	High	7.602e-06	3.559e-07	2.62	98.48	Used	Used	K.GNPMWNSLEVPTGTLYQWDSK.S	[740-760]
	FALSE	High	[K].GPMLQGVK.[A]		0.0147848	0.000377453	1	1	12	731329677	731329677 [908-915]		0	829.46	66.9	29.1	398.9	101.7	11.9	96.5	47.4	118.6	90	39.1		High	High	High	High	High	Peak Found	High	High	Peak Found	High	High	7.112e-05	0.0004841	2.13	12.46	Used	Used	K.GPMLQGVK.A	[908-915]
	FALSE	High	[R].GTFANIR.[I]		0.191467	0.00686234	1	1	26	731329677	731329677 [843-849]		0	778.421	45.2	24.8	30.2	63.2	2.4	228.4	176.1	197.6	165.9	66.1		High	High	High	High	High	High	High	High	High	High	High	0.001046	0.02078	1.08	9.45	Used	Used	R.GTFANIR.I	[843-849]
	FALSE	High	[K].KASELGLEVKPWVK.[T]		7.12433e-10	5.15092e-05	1	1	23	731329677	731329677 [576-589]		1	1583.92	159.4	188	97.2	141	59.9	25.5	89.6	61.2	86.4	91.9		High	High	High	High	High	High	High	High	High	High	High	7.602e-06	9.007e-13	4.74	107.62	Used	Used	K.KASELGLEVKPWVK.T	[576-589]
	FALSE	High	[K].IIDWENSAPK.[L]		2.22487e-05	5.15092e-05	1	1	35	731329677	731329677 [184-193]		0	1172.59	35.7	30	150.3	207.4	34	76	148.5	43.8	135.7	138.5		High	High	High	High	High	High	High	High	High	High	High	7.602e-06	2.229e-07	1.9	23.32	Used	Used	K.IIDWENSAPK.L	[184-193]
	FALSE	High	[R].ILLESAIR.[N]		0.00418994	0.000100671	1	1	38	731329677	731329677 [162-169]		0	914.567	42.6	78.8	45	76.5	92.9	94.6	115.1	109.3	165.7	179.5		High	High	High	High	High	High	High	High	High	High	High	1.369e-05	0.0001151	1.82	25.26	Used	Used	R.ILLESAIR.N	[162-169]
	FALSE	High	[K].LLNGEVGPK.[T]		0.0345819	0.000849464	1	1	4	731329677	731329677 [854-862]		0	926.531	179.1		518.1	227.7			50.4	24.7				High	Not Found	High	Peak Found	Not Found	Not Found	Peak Found	Peak Found	Not Found	Not Found	High	0.000147	0.001355	1.72	11	Used	Used	K.LLNGEVGPK.T	[854-862]
	FALSE	High	[K].INPLVPVDLVIDHSVQVDVAR.[S]		9.01039e-10	5.15092e-05	1	1	2	731329677	731329677 [235-255]		0	2298.28				1000								High	Not Found	Not Found	High	Not Found	Not Found	Not Found	Not Found	Not Found	Not Found	High	7.602e-06	1.191e-12	3.95	112.61	Used	Used	K.INPLVPVDLVIDHSVQVDVAR.S	[235-255]
	FALSE	High	[K].LPYSIR.[I]		0.212373	0.00833692	1	1	4	731329677	731329677 [156-161]		0	748.435	1.6		86.8			215.8	48.5	60.2	478.7	108.5		Peak Found	Not Found	High	Not Found	Not Found	High	Peak Found	Peak Found	High	High	High	0.001267	0.02505	1.16	9.24	Used	Used	K.LPYSIR.I	[156-161]
	FALSE	High	[K].LRDGVTATDLVLTATQMLR.[K]		2.73939e-12	5.15092e-05	1	1	63	731329677	731329677 [372-390]		1	2074.13	200.9	193.9	103.4	70.4	47.1	71.7	118.3	47.1	76.9	70.2		High	High	High	High	High	High	High	High	High	High	High	7.602e-06	1.501e-15	3.99	105.15	Used	Used	K.LRDGVTATDLVLTATQMLR.K	[372-390]
	FALSE	High	[K].LRDGVTATDLVLTATQMLR.[K]	1xOxidation [M17]	3.55468e-07	5.15092e-05	1	1	11	731329677	731329677 [372-390]		1	2090.13	32.3	53.8	55	26.9	14.9	539.6	65.8	31.4	74	106.4		High	Peak Found	High	Peak Found	Peak Found	High	High	High	High	High	High	7.602e-06	1.557e-09	4.78	78.35	Used	Used	K.LRDGVTATDLVLTATQMLR.K	[372-390]
	FALSE	High	[K].LRDGVTATDLVLTATQMLRK.[H]		5.7157e-11	5.15092e-05	1	1	10	731329677	731329677 [372-391]		2	2202.23		24.8	11.6	48.7	32.5	101.1	344.9	140.7	121.2	174.6		Not Found	Peak Found	Peak Found	Peak Found	Peak Found	High	High	High	High	High	High	7.602e-06	4.412e-14	5.55	104.24	Used	Used	K.LRDGVTATDLVLTATQMLRK.H	[372-391]
	FALSE	High	[K].LRDGVTATDLVLTATQMLRK.[H]	1xOxidation [M17]	0.000277251	5.15092e-05	1	1	3	731329677	731329677 [372-391]		2	2218.22		15.2			8.4	610.8	179.5	56.3	27.2	102.5		Not Found	Peak Found	Not Found	Not Found	Peak Found	High	High	Peak Found	Peak Found	Peak Found	High	7.602e-06	4.59e-06	2.44	66.82	Used	Used	K.LRDGVTATDLVLTATQMLRK.H	[372-391]
	FALSE	High	[K].LTGRSDDTVSMIEQYLR.[A]		1.58029e-07	5.15092e-05	1	1	15	731329677	731329677 [443-459]		1	1983.98				2.3		107.1	255	106.4	252.5	276.8		Not Found	Not Found	Not Found	Peak Found	Not Found	Peak Found	High	High	High	High	High	7.602e-06	5.882e-10	3.21	55.82	Used	Used	K.LTGRSDDTVSMIEQYLR.A	[443-459]
	FALSE	High	[K].LTGRSDDTVSMIEQYLR.[A]	1xOxidation [M11]	3.0584e-05	5.15092e-05	1	1	3	731329677	731329677 [443-459]		1	1999.98	3.6		5.3	13.3	3.5	572.3	112.8	53.9	196.1	39.2		Peak Found	Not Found	Peak Found	Peak Found	Peak Found	High	Peak Found	Peak Found	High	High	High	7.602e-06	3.263e-07	3.2	56.8	Used	Used	K.LTGRSDDTVSMIEQYLR.A	[443-459]
	FALSE	High	[K].LVEIPFKPAR.[V]		5.55813e-07	5.15092e-05	1	1	121	731329677	731329677 [194-203]		0	1169.7	80.1	74	78.1	75.5	131.9	77.8	90.3	105.4	102.4	184.3		High	High	High	High	High	High	High	High	High	High	High	7.602e-06	2.652e-09	2.72	15.37	Used	Used	K.LVEIPFKPAR.V	[194-203]
	FALSE	High	[K].LVEIPFKPAR.[V]	1xGG [K7]	0.00498302	0.000145442	1	1	3	731329677	731329677 [194-203]		0	1283.75							289.3	118.1	477.1	115.5		Not Found	Not Found	Not Found	Not Found	Not Found	Not Found	High	Peak Found	High	Peak Found	High	2.019e-05	0.0001403	2.26	22.16	Used	Used	K.LVEIPFKPAR.V	[194-203]
	FALSE	High	[R].IVNKLLNGEVGPK.[T]		2.62689e-06	5.15092e-05	1	1	15	731329677	731329677 [850-862]		1	1380.82						203.1	252.6	133.1	244.5	166.7		Not Found	Not Found	Not Found	Not Found	Not Found	High	High	High	High	High	High	7.602e-06	1.705e-08	2.54	10.28	Used	Used	R.IVNKLLNGEVGPK.T	[850-862]
	FALSE	High	[K].LYVFDAAMK.[Y]		0.00059124	5.15092e-05	1	1	22	731329677	731329677 [872-880]		0	1057.54	41.5	126.6	25.9	286.3	118.2	51.4	49.8	65.1	60.4	174.7		High	High	High	High	High	High	High	High	High	High	High	7.602e-06	1.138e-05	1.57	34.79	Used	Used	K.LYVFDAAMK.Y	[872-880]
	FALSE	High	[K].LYVFDAAMK.[Y]	1xOxidation [M8]	0.00451802	0.000100671	1	1	5	731329677	731329677 [872-880]		0	1073.53	133.4	111.1	133.3	138.3	85.1	120.6	87.8	33.7	102.8	54		High	High	High	Peak Found	High	Peak Found	Peak Found	Peak Found	High	Peak Found	High	1.369e-05	0.0001253	1.91	40.25	Used	Used	K.LYVFDAAMK.Y	[872-880]
	FALSE	High	[K].MFVDYNEPQQER.[V]		1.74386e-07	5.15092e-05	1	1	49	731329677	731329677 [463-474]		0	1555.68	47.5	33.8	102.3	118.5	59.7	64	94	192.3	114.5	173.4		High	High	High	High	High	High	High	High	High	High	High	7.602e-06	6.61e-10	2.64	20.89	Used	Used	K.MFVDYNEPQQER.V	[463-474]
	FALSE	High	[R].NCDGFQVTK.[D]	1xCarbamidomethyl [C2]	0.0821985	0.00211343	1	1	1	731329677	731329677 [170-178]		0	1068.48	99.7	10.7	287.6		565.1					36.8		High	Peak Found	Peak Found	Not Found	Peak Found	Not Found	Not Found	Not Found	Not Found	Peak Found	High	0.0003049	0.00474	0.94	10.21	Used	Used	R.NCDGFQVTK.D	[170-178]
	FALSE	High	[R].NCDGFQVTKDDVEK.[I]	1xCarbamidomethyl [C2]	5.23126e-07	5.15092e-05	1	1	15	731329677	731329677 [170-183]		1	1654.74	107.1	52.3	128.5	152.8	25.8	163.1	31.3	85.7	129.6	123.9		High	Peak Found	High	High	High	Peak Found	Peak Found	High	High	High	High	7.602e-06	2.46e-09	4.21	13.53	Used	Used	R.NCDGFQVTKDDVEK.I	[170-183]
	FALSE	High	[R].NCDGFQVTKDDVEKIIDWENSAPK.[L]	1xCarbamidomethyl [C2]	1.47353e-10	5.15092e-05	1	1	32	731329677	731329677 [170-193]		2	2808.31	41.8	52	32.3	19.2	104.2	135.8	189.3	157	115.8	152.6		High	High	High	Peak Found	High	High	High	High	High	High	High	7.602e-06	1.355e-13	3.45	65.96	Used	Used	R.NCDGFQVTKDDVEKIIDWENSAPK.L	[170-193]
	FALSE	High	[R].NFEGRVHPLTR.[A]		0.000952548	5.15092e-05	1	1	1	731329677	731329677 [658-668]		1	1325.71			9.2	18.3		127.5	207	431.5	138.1	68.4		Not Found	Not Found	Peak Found	Peak Found	Not Found	Peak Found	High	Peak Found	Peak Found	Peak Found	High	7.602e-06	2.001e-05	2.58	12.43	Used	Used	R.NFEGRVHPLTR.A	[658-668]
	FALSE	High	[K].NLNSDPNKINPLVPVDLVIDHSVQVDVAR.[S]		2.11855e-11	5.15092e-05	1	1	10	731329677	731329677 [227-255]		1	3180.7	275.3	148.6	37	141.8		24	10.5	75	183.7	104.1		High	High	Peak Found	High	Not Found	High	Peak Found	High	Peak Found	High	High	7.602e-06	1.467e-14	4.93	111.87	Used	Used	K.NLNSDPNKINPLVPVDLVIDHSVQVDVAR.S	[227-255]
	FALSE	High	[R].RGNDEVMAR.[G]		0.184484	0.00648033	1	1	1	731329677	731329677 [834-842]		1	1047.5	747.3			201.4					13.2	38.1		High	Not Found	Not Found	Peak Found	Not Found	Not Found	Not Found	Not Found	Peak Found	Peak Found	High	0.0009852	0.01939	1.76	88.63	Used	Used	R.RGNDEVMAR.G	[834-842]
	FALSE	High	[R].SDDTVSMIEQYLR.[A]		1.44296e-07	5.15092e-05	1	1	59	731329677	731329677 [447-459]		0	1556.73	72.9	34.9	82.3	84	365.6	30.8	70.3	62.4	90.6	106.3		High	High	High	High	High	High	High	High	High	High	High	7.602e-06	5.247e-10	3.5	68.5	Used	Used	R.SDDTVSMIEQYLR.A	[447-459]
	FALSE	High	[R].SDDTVSMIEQYLR.[A]	1xOxidation [M7]	6.37394e-06	5.15092e-05	1	1	26	731329677	731329677 [447-459]		0	1572.72	25.8	20.1	43.8	239.5	211.6	183.7	59.3	57.6	84.7	73.8		High	High	High	High	High	High	High	High	High	High	High	7.602e-06	4.959e-08	2.63	67.15	Used	Used	R.SDDTVSMIEQYLR.A	[447-459]
	FALSE	High	[R].SENAVQANMEFEFKR.[N]		2.62227e-09	5.15092e-05	1	1	24	731329677	731329677 [256-270]		1	1799.84	0.6	107.9	18.1	107.3	319.3	93.1	47.3	77.2	79.4	149.7		Peak Found	High	Peak Found	High	High	High	High	High	High	High	High	7.602e-06	4.306e-12	4.65	105.28	Used	Used	R.SENAVQANMEFEFKR.N	[256-270]
	FALSE	High	[K].SFTCTLR.[F]	1xCarbamidomethyl [C4]	0.0607286	0.00133321	1	1	26	731329677	731329677 [983-989]		0	884.429	119.5	67.2	385.9	124.7	33	59.1	24.7	46	82.1	57.8		High	High	High	High	High	High	Peak Found	Peak Found	High	High	High	0.0002104	0.00297	1.1	12.04	Used	Used	K.SFTCTLR.F	[983-989]
	FALSE	High	[K].SFTCTLRFDTEVELAYFDHGGILPYVIR.[Q]	1xCarbamidomethyl [C4]	0.000204782	5.15092e-05	1	1	1	731329677	731329677 [983-1010]		1	3319.65								625.3	374.7			Not Found	Not Found	Not Found	Not Found	Not Found	Not Found	Not Found	Peak Found	High	Not Found	High	7.602e-06	3.171e-06	2.57	107.06	Used	Used	K.SFTCTLRFDTEVELAYFDHGGILPYVIR.Q	[983-1010]
	FALSE	High	[R].SNLVGMGVIPLCFK.[A]	1xCarbamidomethyl [C12]	3.69192e-07	5.15092e-05	1	1	25	731329677	731329677 [928-941]		0	1534.81	189.9	211.1	57.9	91.5	222.8	35.9	36.8	60.4	44	49.6		High	High	High	High	High	High	High	High	High	High	High	7.602e-06	1.62e-09	2.46	107.72	Used	Used	R.SNLVGMGVIPLCFK.A	[928-941]
	FALSE	High	[R].SNLVGMGVIPLCFK.[A]	1xCarbamidomethyl [C12]; 1xOxidation [M6]	0.000260951	5.15092e-05	1	1	3	731329677	731329677 [928-941]		0	1550.81				174.8		449.2		100.1	41.3	234.6		Not Found	Not Found	High	Peak Found	Not Found	High	Not Found	Peak Found	Peak Found	High	High	7.602e-06	4.248e-06	1.42	65.44	Used	Used	R.SNLVGMGVIPLCFK.A	[928-941]
	FALSE	High	[R].SNLVGMGVIPLCFKAGEDADTLGLTGHER.[Y]	1xCarbamidomethyl [C12]	1.72765e-10	5.15092e-05	1	1	2	731329677	731329677 [928-956]		1	3057.51						228	462.9	197.3	111.8			Not Found	Not Found	Not Found	Not Found	Not Found	Peak Found	High	High	Peak Found	Not Found	High	7.602e-06	1.645e-13	4.51	55.62	Used	Used	R.SNLVGMGVIPLCFKAGEDADTLGLTGHER.Y	[928-956]
	FALSE	High	[R].STYEAITK.[G]		0.00882421	0.000194547	1	1	22	731329677	731329677 [732-739]		0	912.467	60.2	60.8	339.6	112.2	80.1	64.1	89	81.4	73.3	39.5		Peak Found	High	High	High	High	High	High	High	High	High	High	4.426e-05	0.0002697	1.84	10.97	Used	Used	R.STYEAITK.G	[732-739]
	FALSE	High	[R].STYEAITKGNPMWNSLEVPTGTLYQWDSK.[S]		1.09021e-07	5.15092e-05	1	1	10	731329677	731329677 [732-760]		1	3316.58				6.5		66.5	219.3	272.8	247.6	187.4		Not Found	Not Found	Not Found	Peak Found	Not Found	High	High	High	High	High	High	7.602e-06	3.76e-10	2.58	67.1	Used	Used	R.STYEAITKGNPMWNSLEVPTGTLYQWDSK.S	[732-760]
	FALSE	High	[K].STYIHEPPYFK.[D]		9.59585e-06	5.15092e-05	1	1	15	731329677	731329677 [761-771]		0	1381.68	167.4	171.9	34.1	142.6	407.2	35.3	6.1	7	13.5	14.9		High	High	Peak Found	High	High	High	Peak Found	Peak Found	High	High	High	7.602e-06	8.121e-08	2.28	105.34	Used	Used	K.STYIHEPPYFK.D	[761-771]
	FALSE	High	[K].STYIHEPPYFKDMSLNPPGPFGVK.[D]		0.000938238	5.15092e-05	1	1	4	731329677	731329677 [761-784]		1	2721.34						331.7	88.7	525	50.1	4.5		Not Found	Not Found	Not Found	Not Found	Not Found	High	Peak Found	High	High	Peak Found	High	7.602e-06	1.973e-05	3.49	50.97	Used	Used	K.STYIHEPPYFKDMSLNPPGPFGVK.D	[761-784]
	FALSE	High	[K].SVYFRDIWPSNEEIAQVVQSSVLPDMFR.[S]		6.35527e-11	5.15092e-05	1	1	17	731329677	731329677 [704-731]		1	3312.64	8.3	17.6	4.5		10.4	217.6	229.1	218.5	208.1	85.8		Peak Found	Peak Found	Peak Found	Not Found	Peak Found	High	High	High	High	High	High	7.602e-06	4.967e-14	2.99	100.53	Used	Used	K.SVYFRDIWPSNEEIAQVVQSSVLPDMFR.S	[704-731]
	FALSE	High	[K].TSLAPGSGVVTK.[Y]		1.97088e-05	5.15092e-05	1	1	48	731329677	731329677 [590-601]		0	1116.63	111	25.7	215.3	86.5	30.9	55.7	149.3	108.5	137.2	80.1		High	High	High	High	High	High	High	High	High	High	High	7.602e-06	1.918e-07	2.65	12.1	Used	Used	K.TSLAPGSGVVTK.Y	[590-601]
	FALSE	High	[K].TSLAPGSGVVTKYLLK.[S]		6.13342e-07	5.15092e-05	1	1	8	731329677	731329677 [590-605]		1	1633.95		3.8	69.7	121.2	27.8	94.2	116.3	248.1	78.7	240.2		Not Found	Peak Found	Peak Found	Peak Found	Peak Found	High	High	High	High	High	High	7.602e-06	2.982e-09	3.14	35.75	Used	Used	K.TSLAPGSGVVTKYLLK.S	[590-605]
	FALSE	High	[K].TVHVPTGEK.[L]		0.00245163	0.000100671	1	1	6	731329677	731329677 [863-871]		0	967.521	188.2	50.3	328.8	94.1	56.2	80.8	32.1	52.4	114.8	2.4		High	High	High	High	High	Peak Found	Peak Found	Peak Found	Peak Found	Peak Found	High	1.369e-05	6.131e-05	1.81	10.01	Used	Used	K.TVHVPTGEK.L	[863-871]
	FALSE	High	[K].TVHVPTGEKLYVFDAAMK.[Y]		5.77924e-05	5.15092e-05	1	1	6	731329677	731329677 [863-880]		1	2006.04	51.4		54.1	15.3	66.7	131.2	3.9	167	185.2	325.1		Peak Found	Not Found	Peak Found	Peak Found	Peak Found	Peak Found	High	High	High	High	High	7.602e-06	6.983e-07	2.48	35.53	Used	Used	K.TVHVPTGEKLYVFDAAMK.Y	[863-880]
	FALSE	High	[R].VEKLPYSIR.[I]		0.000604824	5.15092e-05	1	1	29	731329677	731329677 [153-161]		1	1104.64	48.4	88.7		74.2	167.3	179.4	126.9	63.3	164	87.9		High	High	Not Found	High	High	High	High	High	High	High	High	7.602e-06	1.16e-05	1.91	10.32	Used	Used	R.VEKLPYSIR.I	[153-161]
	FALSE	High	[K].VGFKGFAIPKEEQEK.[V]		0.000730851	5.15092e-05	1	1	6	731329677	731329677 [518-532]		2	1706.91						133.1	175.2	301.3	116	274.5		Not Found	Not Found	Not Found	Not Found	Not Found	Peak Found	High	High	High	High	High	7.602e-06	1.454e-05	3.33	21.1	Used	Used	K.VGFKGFAIPKEEQEK.V	[518-532]
	FALSE	High	[R].VLLQDFTGVPAVVDLAAMR.[D]		1.90535e-11	5.15092e-05	1	1	108	731329677	731329677 [204-222]		0	2015.1	126	103.5	74.2	138.1	163.3	107.8	58.9	100.4	73.1	54.9		High	High	High	High	High	High	High	High	High	High	High	7.602e-06	1.296e-14	3.92	112.72	Used	Used	R.VLLQDFTGVPAVVDLAAMR.D	[204-222]
	FALSE	High	[R].VLLQDFTGVPAVVDLAAMR.[D]	1xOxidation [M18]	5.31423e-06	5.15092e-05	1	1	8	731329677	731329677 [204-222]		0	2031.09		86.1	48.1	82.6	390.7	204.2	50.4	30.2	94.7	12.9		Not Found	Peak Found	Peak Found	High	High	High	High	High	High	High	High	7.602e-06	3.999e-08	2.01	105.43	Used	Used	R.VLLQDFTGVPAVVDLAAMR.D	[204-222]
	FALSE	High	[R].VLLQDFTGVPAVVDLAAMRDAMK.[N]		9.20671e-12	5.15092e-05	1	1	22	731329677	731329677 [204-226]		1	2460.3						73.8	214.5	337.9	184	189.8		Not Found	Not Found	Not Found	Not Found	Not Found	High	High	High	High	High	High	7.602e-06	5.776e-15	6.08	83.23	Used	Used	R.VLLQDFTGVPAVVDLAAMRDAMK.N	[204-226]
	FALSE	High	[R].VLLQDFTGVPAVVDLAAMRDAMK.[N]	1xOxidation [M18]	7.59127e-05	5.15092e-05	1	1	2	731329677	731329677 [204-226]		1	2476.29							794.9	46	56.3	102.8		Not Found	Not Found	Not Found	Not Found	Not Found	Not Found	High	Peak Found	Peak Found	High	High	7.602e-06	9.675e-07	2.93	81.04	Used	Used	R.VLLQDFTGVPAVVDLAAMRDAMK.N	[204-226]
	FALSE	High	[K].VSEIRPGQDITVTTDTGK.[S]		9.86796e-10	5.15092e-05	1	1	27	731329677	731329677 [965-982]		0	1916.99	131.5	38.7	98.4	171.4	27.3	108.5	61.1	112.7	135.2	115.3		High	High	High	High	High	High	High	High	High	Peak Found	High	7.602e-06	1.321e-12	4.83	15.42	Used	Used	K.VSEIRPGQDITVTTDTGK.S	[965-982]
	FALSE	High	[R].VYSSYLELDLADVEPCISGPK.[R]	1xCarbamidomethyl [C16]	8.04246e-10	5.15092e-05	1	1	17	731329677	731329677 [475-495]		0	2355.14	128.2	104.2	39.2	56	190.6	8.7	51.8	107.3	216.5	97.4		High	High	High	High	High	Peak Found	High	High	Peak Found	High	High	7.602e-06	1.035e-12	2.9	68.74	Used	Used	R.VYSSYLELDLADVEPCISGPK.R	[475-495]
	FALSE	High	[K].WGSTAFQNMLVVPPGSGIVHQVNLEYLGR.[V]		2.52035e-12	5.15092e-05	1	1	28	731329677	731329677 [280-308]		0	3169.63	242.9	163.1	36.9	161.2	8.9	49.5	54.4	91.1	103.3	88.5		High	High	High	High	High	High	High	High	High	High	High	7.602e-06	1.367e-15	5.22	112.82	Used	Used	K.WGSTAFQNMLVVPPGSGIVHQVNLEYLGR.V	[280-308]
	FALSE	High	[K].WGSTAFQNMLVVPPGSGIVHQVNLEYLGR.[V]	1xOxidation [M9]	2.2405e-06	5.15092e-05	1	1	2	731329677	731329677 [280-308]		0	3185.62	129.6	39.2		193.4	271.3	115.7	129.8	113		8.1		Peak Found	Peak Found	Not Found	High	High	Peak Found	Peak Found	Peak Found	Not Found	Peak Found	High	7.602e-06	1.416e-08	2.85	107.72	Used	Used	K.WGSTAFQNMLVVPPGSGIVHQVNLEYLGR.V	[280-308]
	FALSE	High	[K].YKEAGHQTIVLAGAEYGSGSSR.[D]		5.54835e-10	5.15092e-05	1	1	7	731329677	731329677 [881-902]		1	2281.12	110.7	207.5	10.4	209.3		163.6	19.3	23.6	80.7	175		High	High	Peak Found	High	Not Found	Peak Found	Peak Found	Peak Found	High	High	High	7.602e-06	6.623e-13	3.94	9.91	Used	Used	K.YKEAGHQTIVLAGAEYGSGSSR.D	[881-902]
	FALSE	High	[K].YKEAGHQTIVLAGAEYGSGSSRDWAAK.[G]		5.27412e-06	5.15092e-05	1	1	1	731329677	731329677 [881-907]		2	2852.4	164.6		94.4				594.6			146.3		Peak Found	Not Found	Peak Found	Not Found	Not Found	Not Found	High	Not Found	Not Found	Peak Found	High	7.602e-06	3.959e-08	2.2	20.75	Used	Used	K.YKEAGHQTIVLAGAEYGSGSSRDWAAK.G	[881-907]
	FALSE	High	[R].YTIDLPSK.[V]		0.000586781	5.15092e-05	1	1	24	731329677	731329677 [957-964]		0	936.504	23.3	10.8	155	154.1	4.2	67.1	92.2	171.9	166.9	154.5		High	High	High	High	High	High	High	Peak Found	High	High	High	7.602e-06	1.128e-05	1.22	21.76	Used	Used	R.YTIDLPSK.V	[957-964]
	FALSE	High	[R].YTIDLPSKVSEIRPGQDITVTTDTGK.[S]		7.09094e-05	5.15092e-05	1	1	2	731329677	731329677 [957-982]		1	2834.48			96.7				747		88	68.3		Not Found	Not Found	Peak Found	Not Found	Not Found	Not Found	High	Not Found	Peak Found	High	High	7.602e-06	8.903e-07	3.97	36.64	Used	Used	R.YTIDLPSKVSEIRPGQDITVTTDTGK.S	[957-982]
FALSE		High	Master Protein	3438500406466120006	2489	731341013	PREDICTED: ATP synthase subunit beta, mitochondrial [Beta vulgaris subsp. vulgaris]	MASRRLIPSFARALRRSSRPSSLSTPKPSAHHRPSARGYLLNRVADYATSSAAAAQPSSSPAKSGSEGAGKITDEFTGKGSVGKVCQVIGAVVDVRFDEGLPPILTALEVLDNETRLVLEVAQHLGENMVRTIAMDGTEGLVRGQRVLNTGSPITIPVGRVTLGRIMNVIGEPIDHRGELKTDHYLPIHREAPAFVEQATEQQILVTGIKVVDLLAPYQRGGKIGLFGGAGVGKTVLIMELINNVAKAHGGFSVFAGVGERTREGNDLYREMIESGVIKLGDQQADSKCALVYGQMNEPPGARARVGLTGLTVAEHFRDAEGQDVLLFIDNIFRFTQANSEVSALLGRIPSAVGYQPTLATDLGGLQERITTTKKGSITSVQAIYVPADDLTDPAPATT…	>gi|731341013|ref|XP_010681700.1| PREDICTED: ATP synthase subunit beta, mitochondrial [Beta vulgaris subsp. vulgaris]	0	1040.35	86	56	1895	56	56	552	59.4	6.43	4322.54	86	1895	56	0	76.2	85.2	68.4	90	92.5	89	112.2	145.6	123.4	117.6	9.80061e+08	9.01215e+08	5.18773e+08	8.79538e+08	1.56618e+09	5.07029e+08	1.41897e+09	2.01941e+09	2.00224e+09	3.26499e+09	2.11544e+09	2.36498e+09	1.89842e+09	2.49908e+09	2.56798e+09
	Checked	Confidence	Annotated Sequence	Modifications	Qvality PEP	Qvality q-value	# Protein Groups	# Proteins	# PSMs	Master Protein Accessions	Positions in Master Proteins	Modifications in Master Proteins	# Missed Cleavages	Theo. MH+ [Da]	Abundances (Scaled): F1: Control	Abundances (Scaled): F2: Control	Abundances (Scaled): F3: Control	Abundances (Scaled): F4: Control	Abundances (Scaled): F5: Control	Abundances (Scaled): F6: Sample	Abundances (Scaled): F7: Sample	Abundances (Scaled): F8: Sample	Abundances (Scaled): F9: Sample	Abundances (Scaled): F10: Sample	Quan Info	Found in Sample: [S1] F1: Control	Found in Sample: [S2] F2: Control	Found in Sample: [S3] F3: Control	Found in Sample: [S4] F4: Control	Found in Sample: [S5] F5: Control	Found in Sample: [S6] F6: Sample	Found in Sample: [S7] F7: Sample	Found in Sample: [S8] F8: Sample	Found in Sample: [S9] F9: Sample	Found in Sample: [S10] F10: Sample	Confidence (by Search Engine): Sequest HT	Percolator q-Value (by Search Engine): Sequest HT	Percolator PEP (by Search Engine): Sequest HT	XCorr (by Search Engine): Sequest HT	Top Apex RT [min]	Quan Usage	Quan Ratio Usage	Sequence in Protein	Positions in Proteins
	FALSE	High	[K].AHGGFSVFAGVGER.[T]		3.0745e-09	5.15092e-05	1	1	62	731341013	731341013 [248-261]		0	1390.69	130.5	222.1	30.2	87.9	256.2	56.7	40.4	70.4	43.3	62.3		High	High	High	High	High	High	High	High	High	High	High	7.602e-06	5.203e-12	3.26	108.81	Used	Used	K.AHGGFSVFAGVGER.T	[248-261]
	FALSE	High	[R].ARVGLTGLTVAEHFRDAEGQDVLLFIDNIFR.[F]		5.58398e-12	5.15092e-05	1	1	20	731341013	731341013 [304-334]		2	3472.83	18.6	12.6		12.3	169.3	116.3	242.6	195.8	154.9	77.6		Peak Found	Peak Found	Not Found	Peak Found	Peak Found	High	High	High	High	High	High	7.602e-06	3.326e-15	5.81	109.03	Used	Used	R.ARVGLTGLTVAEHFRDAEGQDVLLFIDNIFR.F	[304-334]
	FALSE	High	[K].CALVYGQMNEPPGAR.[A]	1xCarbamidomethyl [C1]	1.20306e-07	5.15092e-05	1	1	37	731341013	731341013 [289-303]		0	1662.77	32.4	5.3	49.1	57.6	13.8	54	111.9	402.7	119.5	153.6		High	High	High	High	High	High	High	High	High	High	High	7.602e-06	4.24e-10	3.11	22.23	Used	Used	K.CALVYGQMNEPPGAR.A	[289-303]
	FALSE	High	[R].DAEGQDVLLFIDNIFR.[F]		8.61503e-09	5.15092e-05	1	1	26	731341013	731341013 [319-334]		0	1864.94	196.8	156.7	125	224.6	104.5	56.8	30.9	16.1	25.1	63.5		High	Peak Found	High	High	High	High	High	High	High	High	High	7.602e-06	1.784e-11	3.33	110.24	Used	Used	R.DAEGQDVLLFIDNIFR.F	[319-334]
	FALSE	High	[R].EAPAFVEQATEQQILVTGIK.[V]		4.0978e-10	5.15092e-05	1	1	61	731341013	731341013 [191-210]		0	2172.15	32.4	25.4	38.9	85.5	77	39.3	128.4	199.7	204.3	169.1		High	High	High	High	High	High	High	High	High	High	High	7.602e-06	4.605e-13	3.51	56.35	Used	Used	R.EAPAFVEQATEQQILVTGIK.V	[191-210]
	FALSE	High	[R].EAPAFVEQATEQQILVTGIKVVDLLAPYQR.[G]		2.88859e-12	5.15092e-05	1	1	20	731341013	731341013 [191-220]		1	3326.8	64.8	22.4	15.5	29.7	270.3	97.5	139.9	149.8	120.5	89.6		Peak Found	Peak Found	Peak Found	Peak Found	Peak Found	High	High	High	High	High	High	7.602e-06	1.585e-15	6.01	106.89	Used	Used	R.EAPAFVEQATEQQILVTGIKVVDLLAPYQR.G	[191-220]
	FALSE	High	[R].EGNDLYR.[E]		0.175487	0.00609551	1	1	1	731341013	731341013 [264-270]		0	866.4	937.1						32.1			30.9		High	Not Found	Not Found	Not Found	Not Found	Not Found	Peak Found	Not Found	Not Found	Peak Found	High	0.0009336	0.01762	0.98	52.28	Used	Used	R.EGNDLYR.E	[264-270]
	FALSE	High	[R].EGNDLYREMIESGVIK.[L]		0.000337595	5.15092e-05	1	1	14	731341013	731341013 [264-279]		1	1852.91	13.5	8.3	31.3	70.2	126.1	54.7	127.8	245.9	201.1	121.1		Peak Found	Peak Found	Peak Found	High	High	Peak Found	High	High	High	High	High	7.602e-06	5.816e-06	2.61	47.18	Used	Used	R.EGNDLYREMIESGVIK.L	[264-279]
	FALSE	High	[R].EGNDLYREMIESGVIKLGDQQADSK.[C]		3.73949e-11	5.15092e-05	1	1	6	731341013	731341013 [264-288]		2	2795.35	15					7.3	525.1	80.1	161	211.4		Peak Found	Not Found	Not Found	Not Found	Not Found	Peak Found	High	Peak Found	High	High	High	7.602e-06	2.769e-14	5.04	51.88	Used	Used	R.EGNDLYREMIESGVIKLGDQQADSK.C	[264-288]
	FALSE	High	[R].EMIESGVIK.[L]		0.00215608	0.000100671	1	1	7	731341013	731341013 [271-279]		0	1005.53	29.3	17.2	359.9	239.2	56.8	96.7	0.5	20.3	53.3	126.6		High	Peak Found	High	Peak Found	High	Peak Found	Peak Found	High	Peak Found	High	High	1.369e-05	5.262e-05	2.05	11.9	Used	Used	R.EMIESGVIK.L	[271-279]
	FALSE	High	[R].EMIESGVIK.[L]	1xOxidation [M2]	0.011215	0.000239412	1	1	3	731341013	731341013 [271-279]		0	1021.52	93		326.2	298.5	230.6			9	19.3	23.4		High	Not Found	Peak Found	Peak Found	High	Not Found	Not Found	Peak Found	Peak Found	Peak Found	High	5.511e-05	0.0003529	1.19	10.74	Used	Used	R.EMIESGVIK.L	[271-279]
	FALSE	High	[R].EMIESGVIKLGDQQADSK.[C]		9.7367e-07	5.15092e-05	1	1	4	731341013	731341013 [271-288]		1	1947.97						95.8	197.3	210.1	177.7	319.1		Not Found	Not Found	Not Found	Not Found	Not Found	Peak Found	Peak Found	High	Peak Found	High	High	7.602e-06	5.191e-09	3.37	17.51	Used	Used	R.EMIESGVIKLGDQQADSK.C	[271-288]
	FALSE	High	[K].ESITSFQGVLDGK.[Y]		0.00549559	0.000145442	1	1	1	731341013	731341013 [510-522]		0	1380.7	7.5			450.7			330.7		211.1			Peak Found	Not Found	Not Found	High	Not Found	Not Found	Peak Found	Not Found	Peak Found	Not Found	High	2.667e-05	0.0001569	1.59	38.04	Used	Used	K.ESITSFQGVLDGK.Y	[510-522]
	FALSE	High	[K].ESITSFQGVLDGKYDDLSEQSFYMVGGIEEVIAKAEK.[I]		2.56636e-07	5.15092e-05	1	1	4	731341013	731341013 [510-546]		2	4082.98	85.1	59.4	16.6	57.6	119.7	85.6	98.6	69	230.4	177.9		Peak Found	Peak Found	Peak Found	Peak Found	Peak Found	Peak Found	High	Peak Found	High	High	High	7.602e-06	1.046e-09	4.22	104.48	Used	Used	K.ESITSFQGVLDGKYDDLSEQSFYMVGGIEEVIAKAEK.I	[510-546]
	FALSE	High	[R].FDEGLPPILTALEVLDNETR.[L]		1.00889e-10	5.15092e-05	1	1	53	731341013	731341013 [97-116]		0	2242.16	66.6	88.1	205.3	119.4	249.9	69.6	32.2	36	105.6	27.5		High	High	High	High	High	High	High	High	High	High	High	7.602e-06	8.593e-14	4.07	112.22	Used	Used	R.FDEGLPPILTALEVLDNETR.L	[97-116]
	FALSE	High	[R].FDEGLPPILTALEVLDNETRLVLEVAQHLGENMVR.[T]		2.98097e-10	5.15092e-05	1	1	5	731341013	731341013 [97-131]		1	3931.06		17	36.3	291.3	127.2	75.3	154.9	82.4	205.5	10		Not Found	Peak Found	Peak Found	Peak Found	Peak Found	High	High	High	High	Peak Found	High	7.602e-06	3.154e-13	5.09	112.4	Used	Used	R.FDEGLPPILTALEVLDNETRLVLEVAQHLGENMVR.T	[97-131]
	FALSE	High	[R].FLSQPFHVAEVFTGAPGK.[Y]		1.54568e-06	5.15092e-05	1	1	5	731341013	731341013 [487-504]		0	1932	146		6	197.4	188	57	88.9	140.7	72.8	103.2		Peak Found	Not Found	Peak Found	High	Peak Found	Peak Found	High	High	Peak Found	High	High	7.602e-06	9.087e-09	2.16	109.43	Used	Used	R.FLSQPFHVAEVFTGAPGK.Y	[487-504]
	FALSE	High	[R].FTQANSEVSALLGR.[I]		1.86582e-08	5.15092e-05	1	1	48	731341013	731341013 [335-348]		0	1492.78	30.6	73.8	58.8	127.6	127.2	50.1	104.6	164	125	138.3		High	High	High	High	High	High	High	High	High	High	High	7.602e-06	4.502e-11	3.64	37.56	Used	Used	R.FTQANSEVSALLGR.I	[335-348]
	FALSE	High	[R].FTQANSEVSALLGRIPSAVGYQPTLATDLGGLQER.[I]		3.36712e-09	5.15092e-05	1	1	16	731341013	731341013 [335-369]		1	3659.9						88.3	245.7	210	227.4	228.6		Not Found	Not Found	Not Found	Not Found	Not Found	High	High	High	High	High	High	7.602e-06	5.809e-12	3.73	77.86	Used	Used	R.FTQANSEVSALLGRIPSAVGYQPTLATDLGGLQER.I	[335-369]
	FALSE	High	[R].FTQANSEVSALLGRIPSAVGYQPTLATDLGGLQERITTTK.[K]		0.00153427	5.15092e-05	1	1	1	731341013	731341013 [335-374]		2	4204.22				191.2		80.1	109.8	478.8	67.8	72.3		Not Found	Not Found	Not Found	Peak Found	Not Found	Peak Found	Peak Found	High	Peak Found	Peak Found	High	7.602e-06	3.535e-05	2.76	78.1	Used	Used	R.FTQANSEVSALLGRIPSAVGYQPTLATDLGGLQERITTTK.K	[335-374]
	FALSE	High	[R].GELKTDHYLPIHR.[E]		1.86908e-05	5.15092e-05	1	1	22	731341013	731341013 [178-190]		1	1578.84	181.9	163.6	125.8	292.2	69.2	31.8	21.1	37.9	39.5	37.1		High	High	High	High	High	Peak Found	High	High	High	High	High	7.602e-06	1.8e-07	3.63	13.47	Used	Used	R.GELKTDHYLPIHR.E	[178-190]
	FALSE	High	[R].GGKIGLFGGAGVGK.[T]		5.27104e-07	5.15092e-05	1	1	25	731341013	731341013 [221-234]		1	1217.7		10.6	12.7	8.4	1.2	164.5	301.9	165.3	195.6	139.9		Not Found	Peak Found	Peak Found	Peak Found	Peak Found	High	High	High	High	High	High	7.602e-06	2.485e-09	2.43	11.25	Used	Used	R.GGKIGLFGGAGVGK.T	[221-234]
	FALSE	High	[K].GSITSVQAIYVPADDLTDPAPATTFAHLDATTVLSR.[Q]		4.55366e-11	5.15092e-05	1	1	5	731341013	731341013 [376-411]		0	3714.89						80.8	299.2	364.3	171.1	84.5		Not Found	Not Found	Not Found	Not Found	Not Found	Peak Found	High	High	High	High	High	7.602e-06	3.442e-14	4.84	70.4	Used	Used	K.GSITSVQAIYVPADDLTDPAPATTFAHLDATTVLSR.Q	[376-411]
	FALSE	High	[K].KGSITSVQAIYVPADDLTDPAPATTFAHLDATTVLSR.[Q]		4.47465e-15	5.15092e-05	1	1	31	731341013	731341013 [375-411]		1	3842.98	89.3	82.5	80.3	79.5	71.6	155.5	80.6	210	60.7	90.1		High	High	High	High	Peak Found	High	High	High	High	High	High	7.602e-06	1.166e-18	6.44	109.43	Used	Used	K.KGSITSVQAIYVPADDLTDPAPATTFAHLDATTVLSR.Q	[375-411]
	FALSE	High	[K].LGDQQADSKCALVYGQMNEPPGAR.[A]	1xCarbamidomethyl [C10]	1.28719e-08	5.15092e-05	1	1	4	731341013	731341013 [280-303]		1	2605.21				10.7		21.3	245.7	299.4	190.1	232.9		Not Found	Not Found	Not Found	Peak Found	Not Found	Peak Found	High	High	Peak Found	High	High	7.602e-06	2.887e-11	3.53	22.96	Used	Used	K.LGDQQADSKCALVYGQMNEPPGAR.A	[280-303]
	FALSE	High	[K].IGLFGGAGVGK.[T]		3.83445e-07	5.15092e-05	1	1	67	731341013	731341013 [224-234]		0	975.562	80.8	91.2	85	102.8	173.7	68.5	66.7	116.2	85.9	129.3		High	High	High	High	High	High	High	High	High	High	High	7.602e-06	1.695e-09	2.42	29.44	Used	Used	K.IGLFGGAGVGK.T	[224-234]
	FALSE	High	[K].IGLFGGAGVGKTVLIMELINNVAK.[A]		1.66734e-06	5.15092e-05	1	1	3	731341013	731341013 [224-247]		1	2414.38		17.8			227.1		102	514.1	138.9			Not Found	Peak Found	Not Found	Not Found	Peak Found	Not Found	High	High	High	Not Found	High	7.602e-06	9.896e-09	4.83	108.68	Used	Used	K.IGLFGGAGVGKTVLIMELINNVAK.A	[224-247]
	FALSE	High	[K].IGLFGGAGVGKTVLIMELINNVAKAHGGFSVFAGVGER.[T]		9.70245e-13	5.15092e-05	1	1	7	731341013	731341013 [224-261]		2	3786.05			12.3		40.2	164.7	234.3	285.5	204.7	58.3		Not Found	Not Found	Peak Found	Not Found	Peak Found	High	Peak Found	High	High	High	High	7.602e-06	4.695e-16	6.27	108.86	Used	Used	K.IGLFGGAGVGKTVLIMELINNVAKAHGGFSVFAGVGER.T	[224-261]
	FALSE	High	[R].IMNVIGEPIDHR.[G]		4.30085e-05	5.15092e-05	1	1	35	731341013	731341013 [166-177]		0	1393.73	145.2	131.3	179.6	77	154.6	41.4	36.9	65.9	61	107.2		High	High	High	High	High	High	High	Peak Found	High	High	High	7.602e-06	4.904e-07	3.44	105.75	Used	Used	R.IMNVIGEPIDHR.G	[166-177]
	FALSE	High	[R].IMNVIGEPIDHRGELK.[T]		2.7894e-07	5.15092e-05	1	1	17	731341013	731341013 [166-181]		1	1820.97	228.1		16.6	149.5	179.2	20.5	71.3	91.1	54.1	189.7		High	Not Found	High	High	High	Peak Found	Peak Found	High	High	High	High	7.602e-06	1.157e-09	3.79	111.07	Used	Used	R.IMNVIGEPIDHRGELK.T	[166-181]
	FALSE	High	[R].IMNVIGEPIDHRGELKTDHYLPIHR.[E]		4.26351e-07	5.15092e-05	1	1	31	731341013	731341013 [166-190]		2	2953.55	30.5	31.1	45.2	40.4		232.9	186.6	270.9	60.2	102.3		High	Peak Found	High	High	Not Found	High	High	High	High	High	High	7.602e-06	1.923e-09	5.07	27.33	Used	Used	R.IMNVIGEPIDHRGELKTDHYLPIHR.E	[166-190]
	FALSE	High	[R].IPSAVGYQPTLATDLGGLQER.[I]		5.98152e-11	5.15092e-05	1	1	56	731341013	731341013 [349-369]		0	2186.15	44.6	30.8	37.9	83.3	122.3	40.8	112	162.9	227.4	138		High	High	High	High	High	High	High	High	High	High	High	7.602e-06	4.646e-14	5.93	47.76	Used	Used	R.IPSAVGYQPTLATDLGGLQER.I	[349-369]
	FALSE	High	[R].IPSAVGYQPTLATDLGGLQERITTTK.[K]		0.00936983	0.000239412	1	1	1	731341013	731341013 [349-374]		1	2730.47										1000		Not Found	Not Found	Not Found	Not Found	Not Found	Not Found	Not Found	Not Found	Not Found	High	High	4.984e-05	0.0002879	2.08	55.98	Used	Used	R.IPSAVGYQPTLATDLGGLQERITTTK.K	[349-374]
	FALSE	High	[K].ITDEFTGK.[G]		0.000215933	5.15092e-05	1	1	12	731341013	731341013 [72-79]		0	910.452	331	113.8	56.8	272.2	47.4	32	93.1	15.7	24.1	13.8		High	High	Peak Found	High	High	Peak Found	Peak Found	Peak Found	Peak Found	Peak Found	High	7.602e-06	3.396e-06	1.22	10.75	Used	Used	K.ITDEFTGK.G	[72-79]
	FALSE	High	[K].ITDEFTGKGSVGK.[V]		4.81297e-07	5.15092e-05	1	1	13	731341013	731341013 [72-84]		1	1338.69			57.7	46		239.1	116.5	240.6	152.4	147.7		Not Found	Not Found	Peak Found	High	Not Found	High	High	High	High	High	High	7.602e-06	2.228e-09	2.92	12.24	Used	Used	K.ITDEFTGKGSVGK.V	[72-84]
	FALSE	High	[R].ITTTKKGSITSVQAIYVPADDLTDPAPATTFAHLDATTVLSR.[Q]		1.03269e-09	5.15092e-05	1	1	2	731341013	731341013 [370-411]		2	4387.3							380.7	446.4	44.1	128.8		Not Found	Not Found	Not Found	Not Found	Not Found	Not Found	High	Peak Found	Peak Found	High	High	7.602e-06	1.402e-12	5.04	55.19	Used	Used	R.ITTTKKGSITSVQAIYVPADDLTDPAPATTFAHLDATTVLSR.Q	[370-411]
	FALSE	High	[R].LVLEVAQHLGENMVR.[T]		9.78773e-11	5.15092e-05	1	1	54	731341013	731341013 [117-131]		0	1707.92	143.2	252.2	22.8	103.3	158.1	22.9	29.5	121.3	46.7	100.1		High	High	High	High	High	High	High	High	High	High	High	7.602e-06	8.286e-14	4.83	107.67	Used	Used	R.LVLEVAQHLGENMVR.T	[117-131]
	FALSE	High	[R].LVLEVAQHLGENMVR.[T]	1xOxidation [M13]	1.956e-05	5.15092e-05	1	1	17	731341013	731341013 [117-131]		0	1723.92	120.5	263.8	55	87.4	84	149.2	25.6	88.9	85.1	40.4		High	High	Peak Found	High	High	High	High	High	High	High	High	7.602e-06	1.898e-07	2.02	99.54	Used	Used	R.LVLEVAQHLGENMVR.T	[117-131]
	FALSE	High	[R].MLSPHILGEEHYNTAR.[G]		4.58559e-12	5.15092e-05	1	1	207	731341013	731341013 [431-446]		0	1867.91	34.1	46.6	54.7	53.5	144.7	172.5	100.4	173.3	93.8	126.4		High	High	High	High	High	High	High	High	High	High	High	7.602e-06	2.668e-15	4.64	19.67	Used	Used	R.MLSPHILGEEHYNTAR.G	[431-446]
	FALSE	High	[R].MLSPHILGEEHYNTAR.[G]	1xOxidation [M1]	2.83198e-07	5.15092e-05	1	1	10	731341013	731341013 [431-446]		0	1883.91	19.5	161.8	63.6	63.4	415.4	128.1	34.2	10.5	11.9	91.6		Peak Found	High	Peak Found	High	High	High	High	Peak Found	Peak Found	High	High	7.602e-06	1.177e-09	3.77	108.47	Used	Used	R.MLSPHILGEEHYNTAR.G	[431-446]
	FALSE	High	[R].MLSPHILGEEHYNTARGVQK.[V]		0.000364155	5.15092e-05	1	1	2	731341013	731341013 [431-450]		1	2280.16	126.2				12.5		457.9	393.6	9.8			Peak Found	Not Found	Not Found	Not Found	Peak Found	Not Found	High	High	Peak Found	Not Found	High	7.602e-06	6.357e-06	3.23	17.27	Used	Used	R.MLSPHILGEEHYNTARGVQK.V	[431-450]
	FALSE	High	[K].NLQDIIAILGMDELSEDDKLTVAR.[A]		3.64902e-14	5.15092e-05	1	1	67	731341013	731341013 [457-480]		1	2672.38	98.8	136.5	188.6	125.6	25.2	94.5	90.3	60.3	134.8	45.3		High	High	High	High	High	High	High	High	High	High	High	7.602e-06	1.218e-17	6.07	106.43	Used	Used	K.NLQDIIAILGMDELSEDDKLTVAR.A	[457-480]
	FALSE	High	[K].NLQDIIAILGMDELSEDDKLTVAR.[A]	1xOxidation [M11]	6.35527e-11	5.15092e-05	1	1	9	731341013	731341013 [457-480]		1	2688.38	162.2	211.7		64.1	205.5	113	71.9	52.2	70.4	49		High	High	Not Found	Peak Found	High	High	High	Peak Found	Peak Found	High	High	7.602e-06	5e-14	5.53	103.93	Used	Used	K.NLQDIIAILGMDELSEDDKLTVAR.A	[457-480]
	FALSE	High	[R].QISELGIYPAVDPLDSTSR.[M]		5.80297e-11	5.15092e-05	1	1	63	731341013	731341013 [412-430]		0	2061.05	18	1.5	19.6	35.6	38.2	48.5	183.3	328.1	122.4	204.7		High	Peak Found	High	High	High	High	High	High	High	High	High	7.602e-06	4.488e-14	3.31	53.44	Used	Used	R.QISELGIYPAVDPLDSTSR.M	[412-430]
	FALSE	High	[K].SGSEGAGKITDEFTGK.[G]		3.63e-10	5.15092e-05	1	1	15	731341013	731341013 [64-79]		1	1583.75	0.4		3.7	20.2		260.2	155.5	146.1	227.5	186.3		Peak Found	Not Found	Peak Found	Peak Found	Not Found	High	High	High	High	High	High	7.602e-06	4.003e-13	2.8	10.39	Used	Used	K.SGSEGAGKITDEFTGK.G	[64-79]
	FALSE	High	[K].SGSEGAGKITDEFTGKGSVGK.[V]		4.27831e-14	5.15092e-05	1	1	17	731341013	731341013 [64-84]		2	2011.99	7.6	1	123.8	3.8	1.7	184.6	159.4	128.6	162.2	227.4		Peak Found	Peak Found	Peak Found	Peak Found	Peak Found	High	High	High	High	High	High	7.602e-06	1.456e-17	6.58	9.83	Used	Used	K.SGSEGAGKITDEFTGKGSVGK.V	[64-84]
	FALSE	High	[K].TDHYLPIHR.[E]		0.000938238	5.15092e-05	1	1	25	731341013	731341013 [182-190]		0	1151.6	126.7	45.2	32.8	163.1	229.2	98.6	91.7	49.6	111.7	51.4		High	High	High	High	High	High	High	High	High	High	High	7.602e-06	1.969e-05	2.95	108	Used	Used	K.TDHYLPIHR.E	[182-190]
	FALSE	High	[R].TIAMDGTEGLVR.[G]		1.25024e-06	5.15092e-05	1	1	97	731341013	731341013 [132-143]		0	1262.64	22.7	19.1	42.4	40.7	31.9	67.7	202.7	127.5	214.6	230.7		High	High	High	High	High	High	High	High	High	High	High	7.602e-06	7.035e-09	2.09	25.89	Used	Used	R.TIAMDGTEGLVR.G	[132-143]
	FALSE	High	[R].TIAMDGTEGLVR.[G]	1xOxidation [M4]	6.47474e-05	5.15092e-05	1	1	41	731341013	731341013 [132-143]		0	1278.64	41	39.1	71.6	215.7	79.3	60.3	169.3	121.1	77.1	125.6		High	High	High	High	High	High	High	High	High	High	High	7.602e-06	8.028e-07	1.59	49.87	Used	Used	R.TIAMDGTEGLVR.G	[132-143]
	FALSE	High	[R].TIAMDGTEGLVRGQR.[V]		2.49121e-06	5.15092e-05	1	1	23	731341013	731341013 [132-146]		1	1603.82	2.8	1	72.9	33.9		66.5	149.9	395.4	51	226.6		Peak Found	Peak Found	Peak Found	Peak Found	Not Found	High	High	High	High	High	High	7.602e-06	1.601e-08	2.72	18.36	Used	Used	R.TIAMDGTEGLVRGQR.V	[132-146]
	FALSE	High	[R].TIAMDGTEGLVRGQR.[V]	1xOxidation [M4]	0.0459102	0.00109551	1	1	1	731341013	731341013 [132-146]		1	1619.82				42.9		200.4	147.8	190.6		418.2		Not Found	Not Found	Not Found	Peak Found	Not Found	Peak Found	Peak Found	Peak Found	Not Found	High	High	0.0001795	0.001982	1.62	21.64	Used	Used	R.TIAMDGTEGLVRGQR.V	[132-146]
	FALSE	High	[R].TREGNDLYR.[E]		0.0526402	0.00121655	1	1	7	731341013	731341013 [262-270]		1	1123.55	4.8	272.6	260.9	352	11.4	86.8	5	2.6	3.9			Peak Found	High	High	High	High	Peak Found	Peak Found	Peak Found	Peak Found	Not Found	High	0.0001881	0.002396	2.74	79.79	Used	Used	R.TREGNDLYR.E	[262-270]
	FALSE	High	[R].TREGNDLYREMIESGVIK.[L]		2.76834e-07	5.15092e-05	1	1	25	731341013	731341013 [262-279]		2	2110.06	27.5	5.5	17.6	0.9	67.1	175.7	215.1	172.9	171.7	146		High	Peak Found	High	Peak Found	High	High	High	High	High	High	High	7.602e-06	1.146e-09	3.54	36.65	Used	Used	R.TREGNDLYREMIESGVIK.L	[262-279]
	FALSE	High	[R].TREGNDLYREMIESGVIK.[L]	1xOxidation [M11]	0.00494562	0.000145442	1	1	2	731341013	731341013 [262-279]		2	2126.05	35.4	18.2	41.8	16	101.1	631.6	10.9	109.3	19.5	16.2		Peak Found	Peak Found	Peak Found	Peak Found	Peak Found	High	Peak Found	High	Peak Found	Peak Found	High	2.019e-05	0.0001383	2.37	37.72	Used	Used	R.TREGNDLYREMIESGVIK.L	[262-279]
	FALSE	High	[K].TVLIMELINNVAK.[A]		1.31756e-07	5.15092e-05	1	1	76	731341013	731341013 [235-247]		0	1457.84	255.7	230.9	24.9	109	66.7	62	67.5	69.7	71.5	42		High	High	High	High	High	High	High	High	High	High	High	7.602e-06	4.73e-10	2.96	114	Used	Used	K.TVLIMELINNVAK.A	[235-247]
	FALSE	High	[K].TVLIMELINNVAK.[A]	1xOxidation [M5]	1.09149e-05	5.15092e-05	1	1	23	731341013	731341013 [235-247]		0	1473.83	126.5	74.4	19.4	18.7	46.2	248.8	160	39.3	143.6	123.2		High	High	Peak Found	High	Peak Found	High	High	High	High	High	High	7.602e-06	9.451e-08	2.53	87.41	Used	Used	K.TVLIMELINNVAK.A	[235-247]
	FALSE	High	[K].VCQVIGAVVDVR.[F]	1xCarbamidomethyl [C2]	4.8524e-06	5.15092e-05	1	1	41	731341013	731341013 [85-96]		0	1314.72	79.2	32.6	42.1	165.6	73.3	145.2	90.7	147.1	99.3	125		High	High	High	High	High	High	High	High	High	High	High	7.602e-06	3.558e-08	2.62	28.73	Used	Used	K.VCQVIGAVVDVR.F	[85-96]
	FALSE	High	[R].VGLTGLTVAEHFR.[D]		1.89542e-07	5.15092e-05	1	1	32	731341013	731341013 [306-318]		0	1399.77	185	270	55	199	110.4	48.7	29.9	22.2	30.3	49.5		High	High	High	High	High	High	High	High	High	High	High	7.602e-06	7.323e-10	3.89	106.83	Used	Used	R.VGLTGLTVAEHFR.D	[306-318]
	FALSE	High	[R].VGLTGLTVAEHFRDAEGQDVLLFIDNIFR.[F]		6.72862e-17	5.15092e-05	1	1	82	731341013	731341013 [306-334]		1	3245.7	56.3	113	63.7	105.6	8.2	100.2	172.5	168.1	171.1	41.4		High	High	High	High	High	High	High	High	High	High	High	7.602e-06	1.084e-20	5.9	109.15	Used	Used	R.VGLTGLTVAEHFRDAEGQDVLLFIDNIFR.F	[306-334]
	FALSE	High	[R].VLNTGSPITIPVGR.[V]		7.51677e-09	5.15092e-05	1	1	69	731341013	731341013 [147-160]		0	1423.83	63.9	7.8	58	44.9	26.8	35.4	118.8	248.6	203.2	192.5		High	High	High	High	High	High	High	High	High	High	High	7.602e-06	1.516e-11	1.8	30.1	Used	Used	R.VLNTGSPITIPVGR.V	[147-160]
	FALSE	High	[R].VLNTGSPITIPVGRVTLGR.[I]		1.16851e-05	5.15092e-05	1	1	3	731341013	731341013 [147-165]		1	1950.15										1000		Not Found	Not Found	Not Found	Not Found	Not Found	Not Found	Not Found	Not Found	Not Found	High	High	7.602e-06	1.023e-07	3.91	41.74	Used	Used	R.VLNTGSPITIPVGRVTLGR.I	[147-165]
	FALSE	High	[K].VLQNYK.[N]		0.213655	0.00849282	1	1	2	731341013	731341013 [451-456]		0	764.43	248.4	7	340.5	189.1	188.1			23.4	3.5			High	Peak Found	Peak Found	Peak Found	High	Not Found	Not Found	Peak Found	Peak Found	Not Found	High	0.001289	0.02526	1.36	11.14	Used	Used	K.VLQNYK.N	[451-456]
	FALSE	High	[K].VLQNYKNLQDIIAILGMDELSEDDKLTVAR.[A]		1.78489e-19	5.15092e-05	1	1	76	731341013	731341013 [451-480]		2	3417.79	9.8	6.3	2	1.8	5.7	211.2	225.2	214	204.5	119.5		Peak Found	Peak Found	Peak Found	Peak Found	Peak Found	High	High	High	High	High	High	7.602e-06	1.456e-23	7.26	98.24	Used	Used	K.VLQNYKNLQDIIAILGMDELSEDDKLTVAR.A	[451-480]
	FALSE	High	[K].VLQNYKNLQDIIAILGMDELSEDDKLTVAR.[A]	1xOxidation [M17]	3.71999e-07	5.15092e-05	1	1	6	731341013	731341013 [451-480]		2	3433.79						524.9	213.8	134.5	27.6	99.1		Not Found	Not Found	Not Found	Not Found	Not Found	High	High	High	High	High	High	7.602e-06	1.632e-09	4.22	87.11	Used	Used	K.VLQNYKNLQDIIAILGMDELSEDDKLTVAR.A	[451-480]
	FALSE	High	[K].VVDLLAPYQR.[G]		9.8911e-06	5.15092e-05	1	1	78	731341013	731341013 [211-220]		0	1173.66	81.5	62.1	44.2	163.7	63.5	74.6	83.1	143.3	74	210.1		High	High	High	High	High	High	High	High	High	High	High	7.602e-06	8.356e-08	2.25	34.51	Used	Used	K.VVDLLAPYQR.G	[211-220]
FALSE		High	Master Protein	-1705944856186892885	1460	1108966238	PREDICTED: sucrose synthase isoform X2 [Beta vulgaris subsp. vulgaris]	MASRLTRVPSLKERLDETLTAQRNEIISFLKRIASHGKGILQPHEVLSEFEAVADKHKLADGPFGEVLRHTQETIVLPPWITLAVRPRPGVWEYIRVNVDALAVEELTPSQFLHVKEELVDGSTNGNFVLELDFEPFTASFPRPTLSKSIGNGVEFLNRHLSAKMFHDKESMRPLLDFLRMHHYKGKTIMLNDRIQNLDSLQAVLRKAEEFLTTIPADTPYSEFDHKFQEIGLERGWGDNAERVMDMIQLLLDLLEAPDSCTLEKFLGRIPMVFNVVILTPHGYFAQANVLGYPDTGGQVVYILDQVRALEHEMLLRIKQQGLDIVPRILIVSRLLPDAVGTTCGQRLEKVFGTEHSHILRVPFRTEKGIVRRWISRFEVWPYLETYTEDVANEIAGEL…	>gi|1108966238|ref|XP_019106894.1| PREDICTED: sucrose synthase isoform X2 [Beta vulgaris subsp. vulgaris]	0	1037.94	71	71	3034	14	64	805	92.2	6.37	6350.87	71	3034	71	9	148.3	147.6	141	129.1	88.7	115.5	75	42.5	65.9	46.4	3.25276e+09	2.66358e+09	1.82411e+09	2.15131e+09	2.56176e+09	1.12202e+09	1.61722e+09	1.00536e+09	1.82245e+09	2.19757e+09	7.02101e+09	6.98981e+09	6.67523e+09	6.11262e+09	4.20036e+09
	Checked	Confidence	Annotated Sequence	Modifications	Qvality PEP	Qvality q-value	# Protein Groups	# Proteins	# PSMs	Master Protein Accessions	Positions in Master Proteins	Modifications in Master Proteins	# Missed Cleavages	Theo. MH+ [Da]	Abundances (Scaled): F1: Control	Abundances (Scaled): F2: Control	Abundances (Scaled): F3: Control	Abundances (Scaled): F4: Control	Abundances (Scaled): F5: Control	Abundances (Scaled): F6: Sample	Abundances (Scaled): F7: Sample	Abundances (Scaled): F8: Sample	Abundances (Scaled): F9: Sample	Abundances (Scaled): F10: Sample	Quan Info	Found in Sample: [S1] F1: Control	Found in Sample: [S2] F2: Control	Found in Sample: [S3] F3: Control	Found in Sample: [S4] F4: Control	Found in Sample: [S5] F5: Control	Found in Sample: [S6] F6: Sample	Found in Sample: [S7] F7: Sample	Found in Sample: [S8] F8: Sample	Found in Sample: [S9] F9: Sample	Found in Sample: [S10] F10: Sample	Confidence (by Search Engine): Sequest HT	Percolator q-Value (by Search Engine): Sequest HT	Percolator PEP (by Search Engine): Sequest HT	XCorr (by Search Engine): Sequest HT	Top Apex RT [min]	Quan Usage	Quan Ratio Usage	Sequence in Protein	Positions in Proteins
	FALSE	High	[K].AADIIVDFFEK.[SC]		6.52047e-06	5.15092e-05	2	3	94	1108966238; 731348913	1108966238 [715-725]; 731348913 [705-715]		0	1267.66	163.4	156.7	195.3	169.3	190.8	70.8	13.4	10.9	18.4	10.9	Shared	High	High	High	High	High	High	High	High	High	Peak Found	High	7.602e-06	5.084e-08	2.28	111.78	Used	Used	K.AADLLVDFFEK.S	[715-725]
	FALSE	High	[K].AADLLVDFFEKSTADPSYWENISK.[G]		0.0323789	0.000805946	1	2	1	1108966238	1108966238 [715-738]		1	2746.32							1000					Not Found	Not Found	Not Found	Not Found	Not Found	Not Found	High	Not Found	Not Found	Not Found	High	0.0001365	0.001243	2.07	88.75	Used	Used	K.AADLLVDFFEKSTADPSYWENISK.G	[715-738]
	FALSE	High	[K].AEEFLTTIPADTPYSEFDHK.[F]		0.0363946	0.000888446	1	2	1	1108966238	1108966238 [208-227]		0	2311.08					643.1	178.3	71.4	107.2				Not Found	Not Found	Not Found	Not Found	High	Peak Found	Peak Found	Peak Found	Not Found	Not Found	High	0.0001508	0.001455	2.15	99.83	Used	Used	K.AEEFLTTIPADTPYSEFDHK.F	[208-227]
	FALSE	High	[K].AEEFLTTIPADTPYSEFDHKFQEIGLER.[G]		1.32913e-05	5.15092e-05	1	2	2	1108966238	1108966238 [208-235]		1	3283.58						255.6	275.1	116.9	199.6	152.8		Not Found	Not Found	Not Found	Not Found	Not Found	High	Peak Found	Peak Found	High	Peak Found	High	7.602e-06	1.192e-07	2.43	63.23	Used	Used	K.AEEFLTTIPADTPYSEFDHKFQEIGLER.G	[208-235]
	FALSE	High	[R].ALEHEMLLR.[I]		3.72426e-05	5.15092e-05	1	2	49	1108966238	1108966238 [309-317]		0	1111.59	94.2	194.2	71.9	139.7	275.8	76	50	28.7	55.9	13.6		High	High	High	High	High	High	High	High	High	High	High	7.602e-06	4.117e-07	1.81	108.75	Used	Used	R.ALEHEMLLR.I	[309-317]
	FALSE	High	[R].ALEHEMLLR.[I]	1xOxidation [M6]	0.00875826	0.000194547	1	2	13	1108966238	1108966238 [309-317]		0	1127.59	91.8	116.3	36.1	110.5	616.4	8.4	4.2	7.7	5.1	3.5		High	High	High	High	High	Peak Found	Peak Found	Peak Found	Peak Found	Peak Found	High	4.426e-05	0.0002658	1.85	105.89	Used	Used	R.ALEHEMLLR.I	[309-317]
	FALSE	High	[K].DTVGQYESHMAFTLPGLYR.[V]		6.75634e-10	5.15092e-05	1	2	5	1108966238	1108966238 [486-504]		0	2185.04	155.5	102.3	149	122.8	466.5	3.9						Peak Found	High	High	High	High	Peak Found	Not Found	Not Found	Not Found	Not Found	High	7.602e-06	8.448e-13	5.31	109.39	Used	Used	K.DTVGQYESHMAFTLPGLYR.V	[486-504]
	FALSE	High	[R].ELVNLVVVAGDR.[RS]		0.00013916	5.15092e-05	2	3	14	1108966238; 731348913	1108966238 [597-608]; 731348913 [587-598]		0	1283.73	30.1	2	55.8	125.4	77.3	90.2	200.1	106.5	144.5	167.9	Shared	High	Peak Found	High	High	High	High	High	High	High	High	High	7.602e-06	2.005e-06	1.64	37.89	Used	Used	R.ELVNLVVVAGDR.R	[597-608]
	FALSE	High	[R].ELVNLVVVAGDRR.[K]		5.95381e-06	5.15092e-05	1	2	7	1108966238	1108966238 [597-609]		1	1439.83	342.7	267.5	91.2	47.2		31.3	57	60.4	31.3	71.5		High	High	Peak Found	High	Not Found	High	High	Peak Found	Peak Found	High	High	7.602e-06	4.548e-08	3.12	102.7	Used	Used	R.ELVNLVVVAGDRR.K	[597-609]
	FALSE	High	[K].ERLDETLTAQR.[N]		7.24585e-07	5.15092e-05	1	1	25	1108966238	1108966238 [13-23]		1	1331.69	67.1	70.2	172.9	278.2	40.1	131.5	65.5	49.8	72.4	52.3		High	High	High	High	High	High	Peak Found	Peak Found	High	High	High	7.602e-06	3.66e-09	3.15	11.87	Used	Used	K.ERLDETLTAQR.N	[13-23]
	FALSE	High	[K].ESMRPLLDFLR.[M]		0.000340161	5.15092e-05	1	2	32	1108966238	1108966238 [170-180]		0	1376.74	351.7	355	53.2	155	8.1	32.8	18.4	3.5	12.7	9.6		High	High	High	High	High	High	High	Peak Found	High	High	High	7.602e-06	5.848e-06	3.12	106.09	Used	Used	K.ESMRPLLDFLR.M	[170-180]
	FALSE	High	[K].ESMRPLLDFLR.[M]	1xOxidation [M3]	0.00270461	0.000100671	1	2	13	1108966238	1108966238 [170-180]		0	1392.73	294.3	199.9	66.7	202.3	145.3	88.3		0.7	1	1.4		High	High	High	High	High	High	Not Found	Peak Found	Peak Found	Peak Found	High	1.369e-05	6.897e-05	2.31	111.02	Used	Used	K.ESMRPLLDFLR.M	[170-180]
	FALSE	High	[K].FNIVSPGADLSIYFNYTEEK.[K]		2.20422e-08	5.15092e-05	1	2	26	1108966238	1108966238 [516-535]		0	2307.12	319.9	106.8	49	95.2	306	22.1	23.4	15.5	39.9	22.2		High	High	High	High	High	Peak Found	High	High	High	High	High	7.602e-06	5.507e-11	4.32	109.39	Used	Used	K.FNIVSPGADLSIYFNYTEEK.K	[516-535]
	FALSE	High	[K].FNIVSPGADLSIYFNYTEEKKR.[L]		4.69928e-09	5.15092e-05	1	2	3	1108966238	1108966238 [516-537]		2	2591.31		383.6	41.6			120.4	243.2	54.1	117.5	39.5		Not Found	Peak Found	Peak Found	Not Found	Not Found	Peak Found	High	Peak Found	High	High	High	7.602e-06	8.615e-12	5.31	99.53	Used	Used	K.FNIVSPGADLSIYFNYTEEKKR.L	[516-537]
	FALSE	High	[K].FQEIGLER.[G]		0.00149985	5.15092e-05	1	2	31	1108966238	1108966238 [228-235]		0	991.521	125.7	96.6	224.3	340.7	36.8	49.3	16.2	28.7	46.8	34.9		High	High	High	High	High	High	Peak Found	High	Peak Found	High	High	7.602e-06	3.453e-05	1.66	17.67	Used	Used	K.FQEIGLER.G	[228-235]
	FALSE	High	[R].GAFVQPAYYEAFGLTVVEAMTCGLPTFATCHGGPAEIIVHGK.[S]	2xCarbamidomethyl [C22; C30]	1.80587e-12	5.15092e-05	1	2	26	1108966238	1108966238 [661-702]		0	4467.16	154.4	191.7	109.2	128.9	51.5	72.7	91.7	80.2	86.7	33		High	High	High	High	High	High	High	Peak Found	High	High	High	7.602e-06	9.398e-16	5.51	107.61	Used	Used	R.GAFVQPAYYEAFGLTVVEAMTCGLPTFATCHGGPAEIIVHGK.S	[661-702]
	FALSE	High	[K].GILQPHEVLSEFEAVADK.[H]		2.16725e-11	5.15092e-05	1	1	23	1108966238	1108966238 [39-56]		0	1982.02	262.8	199.5	96.3	116.3	192.5	45.3	31.5	8	23.6	24.4		High	High	High	High	High	High	High	Peak Found	High	High	High	7.602e-06	1.497e-14	5.3	112.02	Used	Used	K.GILQPHEVLSEFEAVADK.H	[39-56]
	FALSE	High	[K].GILQPHEVLSEFEAVADKHK.[L]		2.02321e-12	5.15092e-05	1	1	135	1108966238	1108966238 [39-58]		1	2247.18	269.3	205.9	245.5	119.9	12	61.2	30.6	13.7	23.9	18.1		High	High	High	High	High	High	High	High	High	High	High	7.602e-06	1.068e-15	4.93	104.57	Used	Used	K.GILQPHEVLSEFEAVADKHK.L	[39-58]
	FALSE	High	[K].GILQPHEVLSEFEAVADKHKLADGPFGEVLR.[H]		2.25093e-11	5.15092e-05	1	1	43	1108966238	1108966238 [39-69]		2	3401.79	14.2	21.1	6.9	8.3	4.8	200.6	260.2	132	260.3	91.5		Peak Found	Peak Found	Peak Found	Peak Found	Peak Found	High	High	High	High	High	High	7.602e-06	1.57e-14	6.94	108.14	Used	Used	K.GILQPHEVLSEFEAVADKHKLADGPFGEVLR.H	[39-69]
	FALSE	High	[R].GWGDNAER.[V]		0.0296518	0.000768303	1	2	11	1108966238	1108966238 [236-243]		0	904.391	210.7	228.1	257.3	302.9		0.9						High	High	High	High	Not Found	Peak Found	Not Found	Not Found	Not Found	Not Found	High	0.0001329	0.001112	1.52	8.63	Used	Used	R.GWGDNAER.V	[236-243]
	FALSE	High	[R].HTQETIVLPPWITLAVRPRPGVWEYIR.[V]		7.21613e-14	5.15092e-05	1	1	172	1108966238	1108966238 [70-96]		0	3227.78	104.3	102	149.7	123.6	5.3	176.1	95.8	60.5	146.9	35.6		High	High	High	High	High	High	High	High	High	High	High	7.602e-06	2.606e-17	6.72	107.66	Used	Used	R.HTQETIVLPPWITLAVRPRPGVWEYIR.V	[70-96]
	FALSE	High	[R].KAEEFLTTIPADTPYSEFDHK.[F]		6.76428e-08	5.15092e-05	1	2	29	1108966238	1108966238 [207-227]		1	2439.17	317.3	191	17.6	245.8	28	27.1	58	42.1	31.6	41.5		High	High	High	High	High	High	High	High	High	High	High	7.602e-06	2.128e-10	5.17	106.69	Used	Used	R.KAEEFLTTIPADTPYSEFDHK.F	[207-227]
	FALSE	High	[R].KAEEFLTTIPADTPYSEFDHKFQEIGLER.[G]		9.69106e-15	5.15092e-05	1	2	61	1108966238	1108966238 [207-235]		2	3411.67	203.7	234.3	81.1	104.7	6.7	95	97.5	56.9	74.4	45.7		High	High	High	High	High	High	High	High	High	High	High	7.602e-06	2.778e-18	7.4	56.24	Used	Used	R.KAEEFLTTIPADTPYSEFDHKFQEIGLER.G	[207-235]
	FALSE	High	[RK].KKPIIFSMAR.[L]		0.000869845	5.15092e-05	2	5	165	1108966238; 1108911770	1108966238 [566-575]; 1108911770 [573-582]		1	1190.71	112.1	119.2	96.8	77.4	22.4	49.4	183.7	55.9	191.9	91.1	Shared	High	High	High	High	High	High	High	High	High	High	High	7.602e-06	1.8e-05	2.45	10.15	Used	Used	R.KKPIIFSMAR.L	[566-575]
	FALSE	High	[RK].KKPIIFSMAR.[L]	1xOxidation [M8]	0.0402983	0.000930212	2	5	18	1108966238; 1108911770	1108966238 [566-575]; 1108911770 [573-582]		1	1206.7	74.4	155.9	21.7	216	164.8	10.9	185.6	40.4	87.1	43	Shared	High	High	High	High	High	Peak Found	High	High	High	High	High	0.0001608	0.00166	2.03	112.02	Used	Used	R.KKPIIFSMAR.L	[566-575]
	FALSE	High	[RK].KKPIIFSMAR.[L]	1xGG [K2]	0.00183959	5.15092e-05	2	5	2	1108966238; 1108911770	1108966238 [566-575]; 1108911770 [573-582]		1	1304.75							273.7	88.3	445.6	192.3	Shared	Not Found	Not Found	Not Found	Not Found	Not Found	Not Found	Peak Found	Peak Found	High	High	High	7.602e-06	4.369e-05	2.49	13.69	Used	Used	R.KKPIIFSMAR.L	[566-575]
	FALSE	High	[K].KLAESVPLAIEDAN.[-]		3.10509e-05	5.15092e-05	1	2	17	1108966238	1108966238 [792-805]		1	1469.78	85.4	1.2	115.7	171.3	40.2	51.5	127	137.5	125.8	144.3		High	Peak Found	High	High	High	High	High	High	Peak Found	High	High	7.602e-06	3.325e-07	3.12	29.59	Used	Used	K.KLAESVPLAIEDAN.-	[792-805]
	FALSE	High	[K].KMYGLIEEYNLNGQFR.[W]		0.00462134	0.000100671	1	2	2	1108966238	1108966238 [623-638]		1	1974.97					1000							Not Found	Not Found	Not Found	Not Found	High	Not Found	Not Found	Not Found	Not Found	High	High	1.369e-05	0.0001289	3.7	106.88	Used	Used	K.KMYGLIEEYNLNGQFR.W	[623-638]
	FALSE	High	[K].LADGPFGEVLR.[H]		1.23143e-06	5.15092e-05	1	1	166	1108966238	1108966238 [59-69]		0	1173.63	93.7	95.6	144.6	150.8	242.7	59	58.4	52.8	42.3	60.1		High	High	High	High	High	High	High	High	High	High	High	7.602e-06	6.893e-09	1.23	39.43	Used	Used	K.LADGPFGEVLR.H	[59-69]
	FALSE	High	[K].LADGPFGEVLRHTQETIVLPPWITLAVRPRPGVWEYIR.[V]		0.00326652	0.000100671	1	1	2	1108966238	1108966238 [59-96]		1	4382.39						57	311.4	289.7	294.4	47.5		Not Found	Not Found	Not Found	Not Found	Not Found	Peak Found	Peak Found	Peak Found	High	High	High	1.369e-05	8.619e-05	5.19	107.76	Used	Used	K.LADGPFGEVLRHTQETIVLPPWITLAVRPRPGVWEYIR.V	[59-96]
	FALSE	High	[K].LAESVPLAIEDAN.[-]		0.000843903	5.15092e-05	1	2	14	1108966238	1108966238 [793-805]		0	1341.69	132.6	4.1	142.3	207.1	51.1	56.1	105.7	78.9	104.3	117.9		High	High	Peak Found	High	High	Peak Found	High	High	High	High	High	7.602e-06	1.735e-05	2.1	39.58	Used	Used	K.LAESVPLAIEDAN.-	[793-805]
	FALSE	High	[R].IASHGKGILQPHEVLSEFEAVADKHK.[L]		0.0130236	0.000333165	1	1	2	1108966238	1108966238 [33-58]		2	2840.51							859.1		74.3	66.6		Not Found	Not Found	Not Found	Not Found	Not Found	Not Found	High	Not Found	Peak Found	Peak Found	High	6.62e-05	0.0004182	3.18	36.25	Used	Used	R.IASHGKGILQPHEVLSEFEAVADKHK.L	[33-58]
	FALSE	High	[R].LDETLTAQR.[N]		9.97141e-05	5.15092e-05	1	1	33	1108966238	1108966238 [15-23]		0	1046.55	94.1	3.7	426.2	235.3	16.3	45.6	38.6	36.7	49.5	53.9		High	High	High	High	High	High	High	High	High	High	High	7.602e-06	1.344e-06	3.11	10.15	Used	Used	R.LDETLTAQR.N	[15-23]
	FALSE	High	[K].LGVTQCTIAHALEK.[T]	1xCarbamidomethyl [C6]	2.96195e-08	5.15092e-05	1	2	41	1108966238	1108966238 [424-437]		0	1540.82	169.8	210.7	67.2	78.9	165.9	50	74.1	35.4	44.4	103.7		High	High	High	High	High	High	High	High	High	High	High	7.602e-06	7.893e-11	4.24	25.18	Used	Used	K.LGVTQCTIAHALEK.T	[424-437]
	FALSE	High	[R].IKQQGLDIVPR.[I]		3.95475e-06	5.15092e-05	1	2	86	1108966238	1108966238 [318-328]		1	1266.75	87.1	76.3	64.2	73.5	267.4	138.6	99.3	45.7	86	61.9		High	High	High	High	High	High	High	High	High	High	High	7.602e-06	2.782e-08	2.61	10.15	Used	Used	R.IKQQGLDIVPR.I	[318-328]
	FALSE	High	[R].ILIVSR.[L]		0.155533	0.00512962	2	3	39	1108966238; 731346220	1108966238 [329-334]; 731346220 [333-338]		0	700.472	132.3	57.2	259.2	140.6	16.1	30.6	132.2	89.1	89.9	52.9	Shared	High	High	High	High	High	High	High	High	High	High	High	0.0007546	0.01413	1.4	15.07	Used	Used	R.ILIVSR.L	[329-334]
	FALSE	High	[R].LLPDAVGTTCGQR.[L]	1xCarbamidomethyl [C10]	3.17468e-06	5.15092e-05	1	2	66	1108966238	1108966238 [335-347]		0	1387.7	143.5	38.2	150.5	166.9	62.6	64.4	113.2	71.9	106.9	82.1		High	High	High	High	High	High	High	High	High	High	High	7.602e-06	2.153e-08	2.01	16.56	Used	Used	R.LLPDAVGTTCGQR.L	[335-347]
	FALSE	High	[R].LLPDAVGTTCGQRLEK.[V]	1xCarbamidomethyl [C10]	9.5734e-10	5.15092e-05	1	2	24	1108966238	1108966238 [335-350]		1	1757.92		0.9	18.2	23.6		174.3	277.9	153.3	156.8	194.8		Not Found	Peak Found	Peak Found	High	Not Found	High	High	High	High	High	High	7.602e-06	1.282e-12	3.98	16.72	Used	Used	R.LLPDAVGTTCGQRLEK.V	[335-350]
	FALSE	High	[RK].LLTLAGVYGFWK.[Y]		5.60673e-05	5.15092e-05	2	3	11	1108966238; 731348913	1108966238 [757-768]; 731348913 [747-758]		0	1367.77	199	289.3	139.3	175.1	123.5	25.1	21.5	5.7	11.5	10	Shared	High	High	High	High	High	High	Peak Found	Peak Found	Peak Found	Peak Found	High	7.602e-06	6.731e-07	2.66	103.25	Used	Used	R.LLTLAGVYGFWK.Y	[757-768]
	FALSE	High	[R].LLTLAGVYGFWKYVSNLDRR.[E]		6.61228e-08	5.15092e-05	1	2	4	1108966238	1108966238 [757-776]		2	2371.29	265.4	94.8	83.7	218.4	333.6		1.9		1.2	1		High	High	High	High	Peak Found	Not Found	Peak Found	Not Found	Peak Found	Peak Found	High	7.602e-06	2.061e-10	4.24	109.66	Used	Used	R.LLTLAGVYGFWKYVSNLDRR.E	[757-776]
	FALSE	High	[R].IQNLDSLQAVLR.[K]		5.35152e-07	5.15092e-05	1	2	83	1108966238	1108966238 [195-206]		0	1369.78	119.4	70.8	121.5	189.2	206.3	61.2	48.5	57.5	48.3	77.1		High	High	High	High	High	High	High	High	High	High	High	7.602e-06	2.545e-09	2.91	43.66	Used	Used	R.IQNLDSLQAVLR.K	[195-206]
	FALSE	High	[R].IQNLDSLQAVLRK.[A]		0.00319338	0.000100671	1	2	2	1108966238	1108966238 [195-207]		1	1497.87										1000		Not Found	Not Found	Not Found	Not Found	Not Found	Not Found	Not Found	Not Found	Not Found	High	High	1.369e-05	8.398e-05	1.7	23.42	Used	Used	R.IQNLDSLQAVLRK.A	[195-207]
	FALSE	High	[KR].LRELVNLVVVAGDR.[RS]		1.93899e-07	5.15092e-05	2	3	8	1108966238; 731348913	1108966238 [595-608]; 731348913 [585-598]		1	1552.92	517.9	232.2	5.7	120.6	0.3	8.1	60.5	32.1	15	7.7	Shared	High	High	Peak Found	High	Peak Found	Peak Found	High	High	High	Peak Found	High	7.602e-06	7.495e-10	4.16	109.15	Used	Used	K.LRELVNLVVVAGDR.R	[595-608]
	FALSE	High	[K].LRELVNLVVVAGDRR.[K]		1.37883e-07	5.15092e-05	1	2	6	1108966238	1108966238 [595-609]		2	1709.02	483.8		42.1	20.3	118.3	9.1	28.6	163.7	95.3	38.9		High	High	Peak Found	Peak Found	Peak Found	Peak Found	High	Peak Found	Peak Found	High	High	7.602e-06	4.971e-10	5.31	112.19	Used	Used	K.LRELVNLVVVAGDRR.K	[595-609]
	FALSE	High	[R].LTALHPEIEELLFSETQNEEHICVLK.[D]	1xCarbamidomethyl [C23]	1.90423e-12	5.15092e-05	1	2	40	1108966238	1108966238 [538-563]		0	3092.56	476.5	278.8	55.7	100.7	30.9	11.8	19.1	5.8	9.4	11.2		High	High	High	High	High	Peak Found	High	High	Peak Found	High	High	7.602e-06	9.978e-16	8.43	114.14	Used	Used	R.LTALHPEIEELLFSETQNEEHICVLK.D	[538-563]
	FALSE	High	[R].LTALHPEIEELLFSETQNEEHICVLKDR.[K]	1xCarbamidomethyl [C23]	1.67608e-10	5.15092e-05	1	2	54	1108966238	1108966238 [538-565]		1	3363.69	288.8	207.7	158.6	66.8	7.5	131.4	58.9	31.9	20.5	28		High	High	High	High	Peak Found	High	High	High	High	High	High	7.602e-06	1.578e-13	7.92	105.35	Used	Used	R.LTALHPEIEELLFSETQNEEHICVLKDR.K	[538-565]
	FALSE	High	[R].LTRVPSLK.[E]		0.0436442	0.00101231	1	1	4	1108966238	1108966238 [5-12]		1	913.583		117.6		2.4	0.2	460.8	99.1	135.9	119.9	64.3		Not Found	High	Not Found	Peak Found	Peak Found	Peak Found	High	High	High	Peak Found	High	0.00017	0.001849	2.11	8.34	Used	Used	R.LTRVPSLK.E	[5-12]
	FALSE	High	[R].LTRVPSLKER.[L]		6.81973e-07	5.15092e-05	1	1	15	1108966238	1108966238 [5-14]		2	1198.73	0.6	0.5		3.6		355.5	302.5	112.3	172.6	52.3		Peak Found	Peak Found	Not Found	Peak Found	Not Found	High	High	High	High	High	High	7.602e-06	3.39e-09	5.04	7.88	Used	Used	R.LTRVPSLKER.L	[5-14]
	FALSE	High	[-K].MFHDKESMRPLLDFLR.[M]		2.47241e-06	5.15092e-05	1	2	134	1108966238	1108966238 [165-180]		1	2035.03	73.7	157.5	141.7	79.7	5.4	375.9	40.7	16.1	63.7	45.4		High	High	High	High	High	High	High	High	High	High	High	7.602e-06	1.583e-08	2.69	107.52	Used	Used	K.MFHDKESMRPLLDFLR.M	[165-180]
	FALSE	High	[-K].MFHDKESMRPLLDFLR.[M]	1xOxidation [M]	0.000698397	5.15092e-05	1	2	34	1108966238	1108966238 [165-180]		1	2051.02	126	126.9	225.4	180.2	67.5	194	32.1	3.1	28.3	16.4		High	High	High	High	Peak Found	High	High	Peak Found	High	High	High	7.602e-06	1.377e-05	1.97	106.34	Used	Used	K.MFHDKESMRPLLDFLR.M	[165-180]
	FALSE	High	[-K].MFHDKESMRPLLDFLR.[M]	2xOxidation [M1; M8]	0.206051	0.00795117	1	2	3	1108966238	1108966238 [165-180]		1	2067.02	141.3	307	313.8	43.3	194.6							High	High	High	Peak Found	Peak Found	Not Found	Not Found	Not Found	Not Found	Not Found	High	0.001205	0.02379	2.05	105.01	Used	Used	K.MFHDKESMRPLLDFLR.M	[165-180]
	FALSE	High	[K].MYGLIEEYNLNGQFR.[W]		7.2416e-08	5.15092e-05	1	2	23	1108966238	1108966238 [624-638]		0	1846.88	112.6	224.1	9.7	60.4	170.9	122.6	99.9	53.7	94.9	51.2		High	High	High	High	High	High	High	High	High	High	High	7.602e-06	2.29e-10	3.84	55.32	Used	Used	K.MYGLIEEYNLNGQFR.W	[624-638]
	FALSE	High	[K].MYGLIEEYNLNGQFR.[W]	1xOxidation [M1]	3.50122e-07	5.15092e-05	1	2	5	1108966238	1108966238 [624-638]		0	1862.87	84.9	244.7	3.6	45.9	234.4	161.9	101.7	17.8	68.1	36.9		High	High	Peak Found	Peak Found	High	Peak Found	Peak Found	Peak Found	Peak Found	High	High	7.602e-06	1.525e-09	2.48	95.6	Used	Used	K.MYGLIEEYNLNGQFR.W	[624-638]
	FALSE	High	[K].NMTGLVEWYGK.[N]		4.53257e-06	5.15092e-05	1	2	115	1108966238	1108966238 [581-591]		0	1297.62	132.7	129.6	96.4	206.5	155.5	72.8	12.7	77.3	40.3	76.2		High	High	High	High	High	High	High	High	High	High	High	7.602e-06	3.298e-08	1.88	96.03	Used	Used	K.NMTGLVEWYGK.N	[581-591]
	FALSE	High	[K].NMTGLVEWYGK.[N]	1xOxidation [M2]	4.46688e-05	5.15092e-05	1	2	40	1108966238	1108966238 [581-591]		0	1313.62	219.4	102.7	90.5	195.8	159	56.5	51.1	43.8	64.8	16.4		High	High	High	High	High	High	Peak Found	Peak Found	High	Peak Found	High	7.602e-06	5.1e-07	1.83	106.13	Used	Used	K.NMTGLVEWYGK.N	[581-591]
	FALSE	High	[K].NMTGLVEWYGKNK.[K]		0.00831007	0.000145442	1	2	1	1108966238	1108966238 [581-593]		1	1539.76	41.9	13.8	217	62.1		92.9	95.2	199.6		277.5		Peak Found	Peak Found	Peak Found	Peak Found	Not Found	Peak Found	Peak Found	Peak Found	Not Found	High	High	3.817e-05	0.0002505	1.17	34.28	Used	Used	K.NMTGLVEWYGKNK.K	[581-593]
	FALSE	High	[K].QQGLDIVPR.[I]		0.00247022	0.000100671	1	2	30	1108966238	1108966238 [320-328]		0	1025.57	76.4	16.3	185.8	295.6	21.9	73.7	25.7	109	112.2	83.3		High	High	High	High	High	High	High	Peak Found	High	High	High	1.369e-05	6.183e-05	1.4	17.49	Used	Used	K.QQGLDIVPR.I	[320-328]
	FALSE	High	[K].RLTALHPEIEELLFSETQNEEHICVLKDR.[K]	1xCarbamidomethyl [C24]	0.0038274	0.000100671	1	2	1	1108966238	1108966238 [537-565]		2	3519.79		264.9	347.7	222.8		100.9	29.9	15.9	18			Not Found	Peak Found	High	Peak Found	Not Found	Peak Found	Peak Found	Peak Found	Peak Found	Not Found	High	1.369e-05	0.000103	5	107.17	Used	Used	K.RLTALHPEIEELLFSETQNEEHICVLKDR.K	[537-565]
	FALSE	High	[R].RYLEMFYALK.[Y]		1.86908e-05	5.15092e-05	1	2	44	1108966238	1108966238 [780-789]		1	1333.7	342.2	367	99.2	111.9	24.2	28.3	9.9	5.8	5.3	6.3		High	High	High	High	Peak Found	High	High	Peak Found	High	High	High	7.602e-06	1.795e-07	3.07	112.57	Used	Used	R.RYLEMFYALK.Y	[780-789]
	FALSE	High	[R].RYLEMFYALK.[Y]	1xOxidation [M5]	0.0115557	0.000239412	1	2	7	1108966238	1108966238 [780-789]		1	1349.69			19.3	144.2		823.5				13		Not Found	Not Found	Peak Found	High	Not Found	High	Not Found	Not Found	Not Found	Peak Found	High	5.511e-05	0.0003644	2.05	52.71	Used	Used	R.RYLEMFYALK.Y	[780-789]
	FALSE	High	[K].SGFHIDPYHGDK.[A]		6.137e-06	5.15092e-05	1	2	18	1108966238	1108966238 [703-714]		0	1372.63	167.2	232.2	48.8	116.2	356.2	50.5	9.1	8.8	6.8	4.1		High	High	High	High	High	High	High	Peak Found	Peak Found	High	High	7.602e-06	4.737e-08	2.95	108.28	Used	Used	K.SGFHIDPYHGDK.A	[703-714]
	FALSE	High	[K].SGFHIDPYHGDKAADLLVDFFEK.[S]		1.28417e-12	5.15092e-05	1	2	167	1108966238	1108966238 [703-725]		1	2621.27	56	125.3	136.6	87.7	5.4	280.5	157.4	24.7	102.2	24.3		High	High	High	High	Peak Found	High	High	High	High	High	High	7.602e-06	6.44e-16	4.2	107.1	Used	Used	K.SGFHIDPYHGDKAADLLVDFFEK.S	[703-725]
	FALSE	High	[K].SGFHIDPYHGDKAADLLVDFFEKSTADPSYWENISK.[G]		1.29318e-13	5.15092e-05	1	2	17	1108966238	1108966238 [703-738]		2	4099.93	123.4	158.8	170.5	79.8		119.1	66.2	137.9	107.7	36.6		Peak Found	Peak Found	Peak Found	Peak Found	Not Found	High	High	High	High	High	High	7.602e-06	4.968e-17	6.21	98.53	Used	Used	K.SGFHIDPYHGDKAADLLVDFFEKSTADPSYWENISK.G	[703-738]
	FALSE	High	[K].SIGNGVEFLNR.[H]		5.86428e-06	5.15092e-05	1	1	67	1108966238	1108966238 [149-159]		0	1205.63	55.7	40.7	69.3	127.5	42.7	101.1	161.2	125.9	93.4	182.6		High	High	High	High	High	High	High	High	High	High	High	7.602e-06	4.479e-08	1.84	29.2	Used	Used	K.SIGNGVEFLNR.H	[149-159]
	FALSE	High	[K].SIGNGVEFLNRHLSAK.[M]		8.49545e-07	5.15092e-05	1	1	8	1108966238	1108966238 [149-164]		1	1741.93	29.2	4.4	17.2	21.9	1.4	42.5	328.3	296.9	106.5	151.7		Peak Found	Peak Found	Peak Found	Peak Found	Peak Found	High	High	High	High	Peak Found	High	7.602e-06	4.424e-09	3.56	24.91	Used	Used	K.SIGNGVEFLNRHLSAK.M	[149-164]
	FALSE	High	[K].STADPSYWENISK.[G]		2.60554e-07	5.15092e-05	1	2	71	1108966238	1108966238 [726-738]		0	1497.69	108.2	12.8	201.7	277.9	126	39.6	80.2	113.3	15.1	25.3		High	High	High	High	High	High	High	High	High	High	High	7.602e-06	1.068e-09	2.99	26.83	Used	Used	K.STADPSYWENISK.G	[726-738]
	FALSE	High	[K].STADPSYWENISKGGLQR.[I]		9.94301e-10	5.15092e-05	1	2	10	1108966238	1108966238 [726-743]		1	2008.97	16.9	1.7	9.5	5.4	1.7	44.9	312.8	166.3	124	316.8		Peak Found	Peak Found	Peak Found	Peak Found	Peak Found	High	High	High	High	High	High	7.602e-06	1.34e-12	4.39	30.52	Used	Used	K.STADPSYWENISKGGLQR.I	[726-743]
	FALSE	High	[K].TKYPNSDIYWK.[S]		6.00235e-05	5.15092e-05	1	2	118	1108966238	1108966238 [438-448]		1	1414.7	115.8	101.8	107.2	74.4	367.6	43.4	44.9	46.7	37.1	61.3		High	High	High	High	High	High	High	High	High	High	High	7.602e-06	7.283e-07	2.64	106.33	Used	Used	K.TKYPNSDIYWK.S	[438-448]
	FALSE	High	[K].TIMLNDR.[I]		0.0287933	0.000768303	1	2	64	1108966238	1108966238 [188-194]		0	862.445	118.8	43.5	401.2	117.9	35.5	38.7	76.1	50.1	73.3	45.1		High	High	High	High	High	High	High	High	High	High	High	0.0001329	0.001079	1.05	13.05	Used	Used	K.TIMLNDR.I	[188-194]
	FALSE	High	[K].TIMLNDR.[I]	1xOxidation [M3]	0.0782839	0.00177985	1	2	10	1108966238	1108966238 [188-194]		0	878.44	119.5	87.7	440.1	171.2	118.9	2.1	14.2	15.9	17.7	12.8		High	High	High	High	High	Peak Found	Peak Found	Peak Found	Peak Found	Peak Found	High	0.0002661	0.004384	1.2	11.49	Used	Used	K.TIMLNDR.I	[188-194]
	FALSE	High	[K].TIMLNDRIQNLDSLQAVLR.[K]		5.76256e-10	5.15092e-05	1	2	14	1108966238	1108966238 [188-206]		1	2213.21			1.9		4.1	46.3	259	263.7	248.5	176.5		Not Found	Not Found	Peak Found	Not Found	Peak Found	High	High	High	High	High	High	7.602e-06	6.952e-13	3.61	57.68	Used	Used	K.TIMLNDRIQNLDSLQAVLR.K	[188-206]
	FALSE	High	[K].TIMLNDRIQNLDSLQAVLR.[K]	1xOxidation [M3]	0.226794	0.0094074	1	2	1	1108966238	1108966238 [188-206]		1	2229.2							332	490.3	65.1	112.6		Not Found	Not Found	Not Found	Not Found	Not Found	Not Found	Peak Found	High	Peak Found	Peak Found	High	0.001442	0.02826	1.53	53.28	Used	Used	K.TIMLNDRIQNLDSLQAVLR.K	[188-206]
	FALSE	High	[K].VFGTEHSHILR.[V]		9.51789e-07	5.15092e-05	1	2	117	1108966238	1108966238 [351-361]		0	1295.69	196.3	208.8	129.9	154.9	12.2	94.8	50.4	42	57	53.8		High	High	High	High	High	High	High	High	High	High	High	7.602e-06	5.035e-09	3.41	100.7	Used	Used	K.VFGTEHSHILR.V	[351-361]
	FALSE	High	[K].VFGTEHSHILRVPFRTEK.[G]		0.00431823	0.000100671	1	2	3	1108966238	1108966238 [351-368]		2	2153.16		486.6				68.9	328.9	22.7	37.7	55.1		Not Found	Peak Found	Not Found	Not Found	Not Found	Peak Found	High	Peak Found	Peak Found	High	High	1.369e-05	0.0001184	2.84	102.27	Used	Used	K.VFGTEHSHILRVPFRTEK.G	[351-368]
	FALSE	High	[R].VKNMTGLVEWYGK.[N]		0.00916141	0.000239412	1	2	6	1108966238	1108966238 [579-591]		1	1524.79	8.1		94.8	12.4	113.1	135.4	123.2	212	192.1	109.1		Peak Found	Not Found	Peak Found	Peak Found	Peak Found	High	High	High	High	High	High	4.984e-05	0.0002812	1.41	30.36	Used	Used	R.VKNMTGLVEWYGK.N	[579-591]
	FALSE	High	[R].VMDMIQLLLDLLEAPDSCTLEK.[F]	1xCarbamidomethyl [C18]	1.49691e-09	5.15092e-05	1	2	23	1108966238	1108966238 [244-265]		0	2547.28	176.4	308.8	189.9	255.6	41.5	6.5	6.7	3.9	5	5.8		High	High	High	High	Peak Found	Peak Found	High	Peak Found	High	High	High	7.602e-06	2.191e-12	3.49	109.97	Used	Used	R.VMDMIQLLLDLLEAPDSCTLEK.F	[244-265]
	FALSE	High	[R].VMDMIQLLLDLLEAPDSCTLEK.[F]	1xCarbamidomethyl [C18]; 1xOxidation [M2]	7.7435e-10	5.15092e-05	1	2	3	1108966238	1108966238 [244-265]		0	2563.27		644.1	235.7	120.2								Not Found	High	High	Peak Found	Not Found	Not Found	Not Found	Not Found	Not Found	Not Found	High	7.602e-06	9.943e-13	5.24	109.57	Used	Used	R.VMDMIQLLLDLLEAPDSCTLEK.F	[244-265]
	FALSE	High	[R].VNVDALAVEELTPSQFLHVK.[E]		2.43237e-08	5.15092e-05	1	1	18	1108966238	1108966238 [97-116]		0	2209.19	197.2	155	126.9	213.4	219.4	46	1.6	0.7	13.8	26		High	High	High	High	High	High	Peak Found	Peak Found	Peak Found	High	High	7.602e-06	6.215e-11	5.1	110.13	Used	Used	R.VNVDALAVEELTPSQFLHVK.E	[97-116]
	FALSE	High	[R].VVHGIDVFDPK.[F]		8.31372e-05	5.15092e-05	2	3	87	1108966238; 731346220	1108966238 [505-515]; 731346220 [509-519]		0	1225.66	123.4	219.9	120.7	123.3	245	66.1	19.1	28.5	27.9	26	Shared	High	High	High	High	High	High	High	High	High	High	High	7.602e-06	1.079e-06	2.67	106.41	Used	Used	R.VVHGIDVFDPK.F	[505-515]
	FALSE	High	[R].VVHGIDVFDPKFNIVSPGADLSIYFNYTEEK.[K]		4.60432e-05	5.15092e-05	1	2	1	1108966238	1108966238 [505-535]		1	3513.76											Not Reliable	Not Found	Not Found	Not Found	Not Found	Not Found	Not Found	Not Found	Not Found	Not Found	High	High	7.602e-06	5.311e-07	3.11		Not Used	Not Used	R.VVHGIDVFDPKFNIVSPGADLSIYFNYTEEK.K	[505-535]
	FALSE	High	[R].WISAQMNR.[V]		0.00174476	5.15092e-05	1	2	63	1108966238	1108966238 [639-646]		0	1005.49	50.7	55.2	133.8	170.9	25.2	169.6	124.7	69.2	111.4	89.4		High	High	High	High	High	High	High	High	High	High	High	7.602e-06	4.096e-05	1.76	10.7	Used	Used	R.WISAQMNR.V	[639-646]
	FALSE	High	[R].WISAQMNR.[V]	1xOxidation [M6]	0.0118179	0.000239412	1	2	7	1108966238	1108966238 [639-646]		0	1021.49	224.6	103.1	233.8	276.1			51.2	15.2	64.8	31.2		High	High	Peak Found	High	Not Found	Not Found	Peak Found	Peak Found	Peak Found	Peak Found	High	5.511e-05	0.0003741	1.54	72.05	Used	Used	R.WISAQMNR.V	[639-646]
	FALSE	High	[R].YLEMFYALK.[Y]		0.000361408	5.15092e-05	1	2	16	1108966238	1108966238 [781-789]		0	1177.6	94.2	50.7	23.3	274.1	10	235.8	66.4	73	79.9	92.4		High	High	Peak Found	High	High	High	High	Peak Found	Peak Found	High	High	7.602e-06	6.315e-06	1.88	57.5	Used	Used	R.YLEMFYALK.Y	[781-789]
	FALSE	High	[R].YLEMFYALK.[Y]	1xOxidation [M4]	0.00174476	5.15092e-05	1	2	12	1108966238	1108966238 [781-789]		0	1193.59	28	716.5	12.2	70.2	72.9	66.2	4.2	12.7	2.6	14.5		High	High	High	High	High	High	Peak Found	Peak Found	Peak Found	Peak Found	High	7.602e-06	4.096e-05	1.57	38.8	Used	Used	R.YLEMFYALK.Y	[781-789]
	FALSE	High	[K].YPNSDIYWK.[S]		0.00385638	0.000100671	1	2	3	1108966238	1108966238 [440-448]		0	1185.56	284.6		43.3	314.7	193.8	25.9	54.1	43.6		40.1		High	Not Found	Peak Found	High	High	Peak Found	Peak Found	Peak Found	Not Found	Peak Found	High	1.369e-05	0.0001042	1.43	25.15	Used	Used	K.YPNSDIYWK.S	[440-448]
FALSE		High	Master Protein	-3719993087935976246	1082	731325197	PREDICTED: adenosylhomocysteinase [Beta vulgaris subsp. vulgaris]	MATSLSVEKTTSGREYKVKDMSQADFGRLEIELAEVEMPGLVSCRTEFGPSQPFKGAKITGSLHMTIQTAVLIETLTALGAEVRWCSCNIFSTQDHAAAAIARDSAAVFAWKGETLQEYWWCTERALDWGPGGGPDLIVDDGGDATLLIHEGVKAEEEFEKSGKIPDPTSTDNVEFQLVLGLIKESLKVDPKRYHKMKERLVGVSEETTTGVKRLYQMQANGTLLFPAINVNDSVTKSKFDNLYGCRHSLPDGLMRATDVMIAGKVGVVCGYGDVGKGCALALKAAGARVIVTEIDPICALQALMEGFQILTLEDVLAEGDIFVTTTGNKDIIMVDHMKKMKNNAIVCNIGHFDNEIDMHGLETYPGIKRITIKPQTDRFVFPETKSGVIILAEGRLMN…	>gi|731325197|ref|XP_010673385.1| PREDICTED: adenosylhomocysteinase [Beta vulgaris subsp. vulgaris]	0	1027.99	98	61	2103	61	61	487	53.4	6.19	4447.57	98	2103	61	0	92.9	80.4	80.6	79.9	116	120.1	116.7	106.6	102.4	104.4	1.23408e+09	8.78474e+08	6.3121e+08	8.05953e+08	2.02774e+09	7.06063e+08	1.52224e+09	1.52505e+09	1.71514e+09	2.99255e+09	2.66373e+09	2.3053e+09	2.30987e+09	2.29e+09	3.32476e+09
	Checked	Confidence	Annotated Sequence	Modifications	Qvality PEP	Qvality q-value	# Protein Groups	# Proteins	# PSMs	Master Protein Accessions	Positions in Master Proteins	Modifications in Master Proteins	# Missed Cleavages	Theo. MH+ [Da]	Abundances (Scaled): F1: Control	Abundances (Scaled): F2: Control	Abundances (Scaled): F3: Control	Abundances (Scaled): F4: Control	Abundances (Scaled): F5: Control	Abundances (Scaled): F6: Sample	Abundances (Scaled): F7: Sample	Abundances (Scaled): F8: Sample	Abundances (Scaled): F9: Sample	Abundances (Scaled): F10: Sample	Quan Info	Found in Sample: [S1] F1: Control	Found in Sample: [S2] F2: Control	Found in Sample: [S3] F3: Control	Found in Sample: [S4] F4: Control	Found in Sample: [S5] F5: Control	Found in Sample: [S6] F6: Sample	Found in Sample: [S7] F7: Sample	Found in Sample: [S8] F8: Sample	Found in Sample: [S9] F9: Sample	Found in Sample: [S10] F10: Sample	Confidence (by Search Engine): Sequest HT	Percolator q-Value (by Search Engine): Sequest HT	Percolator PEP (by Search Engine): Sequest HT	XCorr (by Search Engine): Sequest HT	Top Apex RT [min]	Quan Usage	Quan Ratio Usage	Sequence in Protein	Positions in Proteins
	FALSE	High	[R].ALDWGPGGGPDLIVDDGGDATLLIHEGVK.[A]		7.01307e-11	5.15092e-05	1	1	9	731325197	731325197 [126-154]		0	2887.45	241.2	168.1	80	115	295.5		21.3	43.4	17.2	18.2		High	High	High	High	High	Not Found	Peak Found	Peak Found	High	High	High	7.602e-06	5.551e-14	4.67	108.56	Used	Used	R.ALDWGPGGGPDLIVDDGGDATLLIHEGVK.A	[126-154]
	FALSE	High	[R].ALDWGPGGGPDLIVDDGGDATLLIHEGVKAEEEFEK.[S]		8.70045e-18	5.15092e-05	1	1	93	731325197	731325197 [126-161]		1	3749.82	138.7	79	56	65.1	217.8	112.1	80.2	68.9	96.3	85.9		High	High	High	High	High	High	High	High	High	High	High	7.602e-06	1.108e-21	6.93	112.45	Used	Used	R.ALDWGPGGGPDLIVDDGGDATLLIHEGVKAEEEFEK.S	[126-161]
	FALSE	High	[R].ALDWGPGGGPDLIVDDGGDATLLIHEGVKAEEEFEKSGK.[I]		0.0845148	0.00232075	1	1	1	731325197	731325197 [126-164]		2	4021.97							146.4	435.3	210.5	207.8		Not Found	Not Found	Not Found	Not Found	Not Found	Not Found	Peak Found	High	Peak Found	Peak Found	High	0.000334	0.004994	2.06	85.71	Used	Used	R.ALDWGPGGGPDLIVDDGGDATLLIHEGVKAEEEFEKSGK.I	[126-164]
	FALSE	High	[R].ATDVMIAGK.[V]		0.000195684	5.15092e-05	1	1	29	731325197	731325197 [257-265]		0	905.476	110	29.3	307.1	157.6	29.4	47.4	85.1	96.1	105.1	32.8		High	High	High	High	High	Peak Found	High	Peak Found	Peak Found	Peak Found	High	7.602e-06	3.003e-06	1.64	13.23	Used	Used	R.ATDVMIAGK.V	[257-265]
	FALSE	High	[R].ATDVMIAGK.[V]	1xOxidation [M5]	0.000831224	5.15092e-05	1	1	1	731325197	731325197 [257-265]		0	921.471	127.4	11	242.2	132.7	320.9	98.6	67.2					Peak Found	Peak Found	Peak Found	Peak Found	High	Peak Found	Peak Found	Not Found	Not Found	Not Found	High	7.602e-06	1.709e-05	1.44	10.89	Used	Used	R.ATDVMIAGK.V	[257-265]
	FALSE	High	[K].DIIMVDHMK.[K]		0.00668315	0.000145442	1	1	10	731325197	731325197 [331-339]		0	1101.54	96	340.6	59	151.2	238.3	49.6	9.1	8.9	20.2	27.1		High	High	Peak Found	High	High	High	Peak Found	Peak Found	High	Peak Found	High	3.22e-05	0.000197	1.33	93.14	Used	Used	K.DIIMVDHMK.K	[331-339]
	FALSE	High	[K].DMSQADFGR.[L]		0.000736405	5.15092e-05	1	1	6	731325197	731325197 [20-28]		0	1026.43	141	2.1	485.9	325	40.7					5.3		High	Peak Found	High	High	Peak Found	Not Found	Not Found	Not Found	Not Found	Peak Found	High	7.602e-06	1.48e-05	1.29	11.95	Used	Used	K.DMSQADFGR.L	[20-28]
	FALSE	High	[K].DMSQADFGRLEIELAEVEMPGLVSCR.[T]	1xCarbamidomethyl [C25]	1.36441e-12	5.15092e-05	1	1	20	731325197	731325197 [20-45]		1	2952.39	120.1	21.2	359.1	98.3	28	65	22.1	29.4	198.3	58.3		High	High	Peak Found	High	High	High	High	High	High	High	High	7.602e-06	6.858e-16	4.16	91.02	Used	Used	K.DMSQADFGRLEIELAEVEMPGLVSCR.T	[20-45]
	FALSE	High	[K].DMSQADFGRLEIELAEVEMPGLVSCR.[T]	1xCarbamidomethyl [C25]; 1xOxidation [M19]	8.82857e-06	5.15092e-05	1	1	2	731325197	731325197 [20-45]		1	2968.38			192.8	77.6		211	172	61	122.6	163		Not Found	Not Found	Peak Found	Peak Found	Not Found	Peak Found	High	Peak Found	Peak Found	High	High	7.602e-06	7.34e-08	2.05	91.9	Used	Used	K.DMSQADFGRLEIELAEVEMPGLVSCR.T	[20-45]
	FALSE	High	[K].DQSDYLSIPVEGPYKPAHYR.[Y]		1.27598e-10	5.15092e-05	1	1	40	731325197	731325197 [467-486]		0	2335.14	250.5	287.6	1.7	162.5	102	66.3	20.5	18.8	36.8	53.3		High	High	Peak Found	High	High	High	High	High	High	High	High	7.602e-06	1.145e-13	5.05	99.98	Used	Used	K.DQSDYLSIPVEGPYKPAHYR.Y	[467-486]
	FALSE	High	[K].DQSDYLSIPVEGPYKPAHYRY.[-]		5.45849e-12	5.15092e-05	1	1	139	731325197	731325197 [467-487]		1	2498.2	26	31.1	21.6	51.7	55.6	168.9	188.9	145.4	143.6	167.2		High	High	High	High	High	High	High	High	High	High	High	7.602e-06	3.235e-15	4.63	36.49	Used	Used	K.DQSDYLSIPVEGPYKPAHYRY.-	[467-487]
	FALSE	High	[R].DSAAVFAWK.[G]		4.78207e-05	5.15092e-05	1	1	54	731325197	731325197 [104-112]		0	994.499	61.7	110.4	146.2	176.9	76.8	85.4	65	44.2	83.4	149.9		High	High	High	High	High	High	High	High	High	High	High	7.602e-06	5.542e-07	1.65	34.56	Used	Used	R.DSAAVFAWK.G	[104-112]
	FALSE	High	[K].ERLVGVSEETTTGVKR.[L]		3.45253e-05	5.15092e-05	1	1	2	731325197	731325197 [199-214]		2	1760.95						68.8	231.2	344.9	177	178.1		Not Found	Not Found	Not Found	Not Found	Not Found	Peak Found	High	Peak Found	Peak Found	Peak Found	High	7.602e-06	3.753e-07	3.09	11.98	Used	Used	K.ERLVGVSEETTTGVKR.L	[199-214]
	FALSE	High	[K].FDNLYGCR.[H]	1xCarbamidomethyl [C7]	0.000614052	5.15092e-05	1	1	26	731325197	731325197 [240-247]		0	1044.46	33.4	15.7	39.2	74.4	8.4	271.5	171.6	97	159.9	128.8		High	High	High	High	High	High	High	High	High	High	High	7.602e-06	1.19e-05	2.11	17.29	Used	Used	K.FDNLYGCR.H	[240-247]
	FALSE	High	[R].FVFPETK.[S]		0.0408877	0.00097306	1	1	51	731325197	731325197 [380-386]		0	867.461	165.5	98.4	191.4	153.4	61.5	84.8	38.7	48.8	71.1	86.5		High	High	High	High	High	High	High	High	High	High	High	0.0001657	0.001695	1.29	78.84	Used	Used	R.FVFPETK.S	[380-386]
	FALSE	High	[K].GCALALK.[A]	1xCarbamidomethyl [C2]	0.00566361	0.000145442	1	1	16	731325197	731325197 [278-284]		0	732.407	185.7	33.3	427.8	237.7	24	21.3	21.4	18.9	14.9	15		High	High	High	High	High	High	Peak Found	Peak Found	Peak Found	Peak Found	High	2.667e-05	0.0001621	2.06	12.25	Used	Used	K.GCALALK.A	[278-284]
	FALSE	High	[K].GETLQEYWWCTER.[A]	1xCarbamidomethyl [C10]	1.0261e-07	5.15092e-05	1	1	147	731325197	731325197 [113-125]		0	1757.76	130.1	140.8	68.9	144	321.3	41.4	45.1	19.6	51.3	37.5		High	High	High	High	High	High	High	High	High	High	High	7.602e-06	3.48e-10	3.11	98.77	Used	Used	K.GETLQEYWWCTER.A	[113-125]
	FALSE	High	[K].HLDEKVAALHLNK.[L]		1.55744e-06	5.15092e-05	1	1	32	731325197	731325197 [444-456]		1	1487.83	8.3	5.4	39.8	6.5	7.9	120.6	256	244	178.1	133.3		Peak Found	Peak Found	Peak Found	Peak Found	Peak Found	High	High	High	High	High	High	7.602e-06	9.162e-09	4.15	12.11	Used	Used	K.HLDEKVAALHLNK.L	[444-456]
	FALSE	High	[K].HLDEKVAALHLNKLGAK.[L]		1.49867e-07	5.15092e-05	1	1	8	731325197	731325197 [444-460]		2	1857.07	2.6	18				3.3	535.3	358.3	60.7	21.7		Peak Found	Peak Found	Not Found	Not Found	Not Found	Peak Found	High	High	High	High	High	7.602e-06	5.499e-10	4.51	15.56	Used	Used	K.HLDEKVAALHLNKLGAK.L	[444-460]
	FALSE	High	[R].HSLPDGLMR.[A]		4.23617e-05	5.15092e-05	1	1	70	731325197	731325197 [248-256]		0	1025.52	82.9	79.6	44.2	62.3	190.5	145.1	133.4	64.9	130	67		High	High	High	High	High	High	High	High	High	High	High	7.602e-06	4.805e-07	2.84	9.76	Used	Used	R.HSLPDGLMR.A	[248-256]
	FALSE	High	[R].HSLPDGLMR.[A]	1xOxidation [M8]	0.00588082	0.000145442	1	1	5	731325197	731325197 [248-256]		0	1041.51	44.2	438.8	16	225.9	36.4	40	10.5	18.7	3.8	165.7		Peak Found	High	Peak Found	High	High	Peak Found	Peak Found	Peak Found	Peak Found	High	High	2.667e-05	0.0001689	1.5	80.44	Used	Used	R.HSLPDGLMR.A	[248-256]
	FALSE	High	[K].KVYVLPK.[H]		0.0287933	0.000768303	1	1	41	731325197	731325197 [437-443]		1	846.545	62.5	70.6	60.6	49.4	152.6	185.7	146.9	103	122	46.7		High	High	High	High	High	High	High	High	High	High	High	0.0001329	0.001075	2.83	8.18	Used	Used	K.KVYVLPK.H	[437-443]
	FALSE	High	[K].KVYVLPK.[H]	1xGG [K1]	0.230849	0.00970965	1	1	1	731325197	731325197 [437-443]		1	960.588				99.4		69.6	282.7	147.7	281.4	119.1		Not Found	Not Found	Not Found	Peak Found	Not Found	Peak Found	Peak Found	Peak Found	High	Peak Found	High	0.001503	0.02931	1.97	11.76	Used	Used	K.KVYVLPK.H	[437-443]
	FALSE	High	[R].LEIELAEVEMPGLVSCR.[T]	1xCarbamidomethyl [C16]	3.69192e-07	5.15092e-05	1	1	4	731325197	731325197 [29-45]		0	1944.98	253.2	120.2	21.3	30.4	336.9	31.3	72.6	32.3	50.6	51.2		High	Peak Found	Peak Found	Peak Found	High	Peak Found	Peak Found	Peak Found	High	Peak Found	High	7.602e-06	1.618e-09	3.3	103.56	Used	Used	R.LEIELAEVEMPGLVSCR.T	[29-45]
	FALSE	High	[R].LMNLGCATGHPSFVMSCSFTNQVIAQLELWNEK.[A]	2xCarbamidomethyl [C6; C17]	7.98176e-10	5.15092e-05	1	1	30	731325197	731325197 [397-429]		0	3782.78	217.7	210.8	88.7	61.4	186.7	72	29.1	28.4	39.5	65.7		High	High	High	High	High	High	High	High	High	High	High	7.602e-06	1.03e-12	5.25	112.81	Used	Used	R.LMNLGCATGHPSFVMSCSFTNQVIAQLELWNEK.A	[397-429]
	FALSE	High	[R].LMNLGCATGHPSFVMSCSFTNQVIAQLELWNEK.[A]	2xCarbamidomethyl [C6; C17]; 1xOxidation [M15]	6.2307e-06	5.15092e-05	1	1	1	731325197	731325197 [397-429]		0	3798.77											No Quan Values	Not Found	Not Found	Not Found	Not Found	Not Found	Not Found	High	Not Found	Not Found	Not Found	High	7.602e-06	4.821e-08	2.89		Not Used	Not Used	R.LMNLGCATGHPSFVMSCSFTNQVIAQLELWNEK.A	[397-429]
	FALSE	High	[R].LMNLGCATGHPSFVMSCSFTNQVIAQLELWNEKASGKYEK.[K]	2xCarbamidomethyl [C6; C17]	8.49046e-08	5.15092e-05	1	1	3	731325197	731325197 [397-436]		2	4546.17						102.1	311.1	202.6	175.7	208.5		Not Found	Not Found	Not Found	Not Found	Not Found	Peak Found	High	Peak Found	High	High	High	7.602e-06	2.78e-10	4.48	105.39	Used	Used	R.LMNLGCATGHPSFVMSCSFTNQVIAQLELWNEKASGKYEK.K	[397-436]
	FALSE	High	[R].LMNLGCATGHPSFVMSCSFTNQVIAQLELWNEKASGKYEK.[K]	2xCarbamidomethyl [C6; C17]; 2xOxidation [M2; M15]	0.0680234	0.00157116	1	1	1	731325197	731325197 [397-436]		2	4578.16							1000					Not Found	Not Found	Not Found	Not Found	Not Found	Not Found	High	Not Found	Not Found	Not Found	High	0.0002371	0.003521	3.2	84.88	Used	Used	R.LMNLGCATGHPSFVMSCSFTNQVIAQLELWNEKASGKYEK.K	[397-436]
	FALSE	High	[K].IPDPTSTDNVEFQLVLGLIK.[E]		2.37074e-13	5.15092e-05	1	1	25	731325197	731325197 [165-184]		0	2199.19	228.1	138.8	83.5	152.9	301	30	12.4	17.9	25.6	9.8		High	High	High	High	High	High	High	High	High	High	High	7.602e-06	9.78e-17	5.23	112.92	Used	Used	K.IPDPTSTDNVEFQLVLGLIK.E	[165-184]
	FALSE	High	[K].IPDPTSTDNVEFQLVLGLIKESLK.[V]		0.0380209	0.000888446	1	1	1	731325197	731325197 [165-188]		1	2656.44						408.3	546.9		44.9			Not Found	Not Found	Not Found	Not Found	Not Found	High	Peak Found	Not Found	Peak Found	Not Found	High	0.0001508	0.001532	1.62	104.3	Used	Used	K.IPDPTSTDNVEFQLVLGLIKESLK.V	[165-188]
	FALSE	High	[K].IPDPTSTDNVEFQLVLGLIKESLKVDPK.[R]		5.3421e-10	5.15092e-05	1	1	6	731325197	731325197 [165-192]		2	3095.69	47.5	37.2	90.7	26.5		358.7	49.1	161.6	38.8	189.9		Peak Found	Peak Found	Peak Found	Peak Found	Not Found	High	Peak Found	High	Peak Found	High	High	7.602e-06	6.377e-13	5.06	106.62	Used	Used	K.IPDPTSTDNVEFQLVLGLIKESLKVDPK.R	[165-192]
	FALSE	High	[K].ITGSLHMTIQTAVLIETLTALGAEVR.[W]		1.26709e-09	5.15092e-05	1	1	18	731325197	731325197 [59-84]		0	2738.51	87.8	281.5	171.1	53.3	18	142.5	38.7	81.6	64	61.5		High	High	High	High	Peak Found	High	High	High	High	High	High	7.602e-06	1.792e-12	4.44	108.12	Used	Used	K.ITGSLHMTIQTAVLIETLTALGAEVR.W	[59-84]
	FALSE	High	[K].LTKDQSDYLSIPVEGPYKPAHYR.[Y]		5.95381e-06	5.15092e-05	1	1	9	731325197	731325197 [464-486]		1	2677.36	127.6	206.2	11.1	23.6	217.1	99	32.5	107.7	60.5	114.6		High	High	Peak Found	Peak Found	Peak Found	Peak Found	High	High	High	High	High	7.602e-06	4.543e-08	2.93	109.13	Used	Used	K.LTKDQSDYLSIPVEGPYKPAHYR.Y	[464-486]
	FALSE	High	[K].LTKDQSDYLSIPVEGPYKPAHYRY.[-]		4.65561e-12	5.15092e-05	1	1	54	731325197	731325197 [464-487]		2	2840.43	4.7	0.6	26.6		10.3	297.9	211	156.3	120.7	171.9		Peak Found	Peak Found	Peak Found	Not Found	High	High	High	High	High	High	High	7.602e-06	2.704e-15	6.44	29.75	Used	Used	K.LTKDQSDYLSIPVEGPYKPAHYRY.-	[464-487]
	FALSE	High	[R].ITIKPQTDR.[F]		0.00103524	5.15092e-05	1	1	31	731325197	731325197 [371-379]		0	1071.62	182.6	121.9	331.2	214.6	8.1	59.8	6.9	37.5	23.9	13.3		High	High	High	High	High	High	High	High	High	High	High	7.602e-06	2.206e-05	2.59	88.97	Used	Used	R.ITIKPQTDR.F	[371-379]
	FALSE	High	[R].ITIKPQTDRFVFPETK.[S]		2.3986e-06	5.15092e-05	1	1	78	731325197	731325197 [371-386]		1	1920.06	24.8	38.8	32.9	36	73.5	136.7	134.9	188.7	109.7	224		High	High	High	High	High	High	High	High	High	High	High	7.602e-06	1.539e-08	3.05	25.34	Used	Used	R.ITIKPQTDRFVFPETK.S	[371-386]
	FALSE	High	[R].ITIKPQTDRFVFPETKSGVIILAEGR.[L]		0.00153427	5.15092e-05	1	1	2	731325197	731325197 [371-396]		2	2915.64			17.5		17.4	43.8		479.4	31.3	410.7		Not Found	Not Found	Peak Found	Not Found	Peak Found	Peak Found	Not Found	High	Peak Found	High	High	7.602e-06	3.517e-05	2.39	44.99	Used	Used	R.ITIKPQTDRFVFPETKSGVIILAEGR.L	[371-396]
	FALSE	High	[R].LVGVSEETTTGVK.[R]		4.3947e-07	5.15092e-05	1	1	46	731325197	731325197 [201-213]		0	1319.71	53.8	7.9	190.4	138.1	31.5	63.6	100.6	148	84.7	181.4		High	High	High	High	High	High	High	High	High	High	High	7.602e-06	2.002e-09	2.03	14.59	Used	Used	R.LVGVSEETTTGVK.R	[201-213]
	FALSE	High	[R].LVGVSEETTTGVKR.[L]		7.57393e-09	5.15092e-05	1	1	91	731325197	731325197 [201-214]		1	1475.81	35.7	20	74	73.1	12.7	186.5	158.8	178.5	130.1	130.7		High	High	High	High	High	High	High	High	High	High	High	7.602e-06	1.528e-11	3.5	12.33	Used	Used	R.LVGVSEETTTGVKR.L	[201-214]
	FALSE	High	[R].LVGVSEETTTGVKR.[L]	1xGG [K13]	1.26932e-06	5.15092e-05	1	1	6	731325197	731325197 [201-214]		1	1589.85	55.1		4.6	103.3		48	169.8	181	263.3	174.9		High	Not Found	Peak Found	High	Not Found	Peak Found	Peak Found	High	Peak Found	High	High	7.602e-06	7.15e-09	2.93	11.52	Used	Used	R.LVGVSEETTTGVKR.L	[201-214]
	FALSE	High	[R].LYQMQANGTLLFPAINVNDSVTK.[S]		4.59638e-08	5.15092e-05	1	1	12	731325197	731325197 [215-237]		0	2537.31	1.4		10.3	8.9		54.1	199.8	366.7	105.9	252.9		Peak Found	High	High	Peak Found	Not Found	High	High	High	High	High	High	7.602e-06	1.33e-10	3.69	67.11	Used	Used	R.LYQMQANGTLLFPAINVNDSVTK.S	[215-237]
	FALSE	High	[R].LYQMQANGTLLFPAINVNDSVTK.[S]	1xOxidation [M4]	1.24152e-05	5.15092e-05	1	1	4	731325197	731325197 [215-237]		0	2553.3							346.5	389.2	206.2	58.1		Not Found	Not Found	Not Found	Not Found	Not Found	Not Found	High	High	Peak Found	High	High	7.602e-06	1.098e-07	3.33	63.52	Used	Used	R.LYQMQANGTLLFPAINVNDSVTK.S	[215-237]
	FALSE	High	[R].LYQMQANGTLLFPAINVNDSVTKSKFDNLYGCR.[H]	1xCarbamidomethyl [C32]	1.55744e-06	5.15092e-05	1	1	1	731325197	731325197 [215-247]		2	3777.87							297.9	702.1				Not Found	Not Found	Not Found	Not Found	Not Found	Not Found	Peak Found	High	Not Found	Not Found	High	7.602e-06	9.118e-09	3.9	60.19	Used	Used	R.LYQMQANGTLLFPAINVNDSVTKSKFDNLYGCR.H	[215-247]
	FALSE	High	[-].MATSLSVEK.[T]	1xMet-loss+Acetyl [N-Term]	0.00024009	5.15092e-05	1	1	48	731325197	731325197 [1-9]	731325197 1xMet-loss+Acetyl [N-Term]	0	876.467	23.2	4.7	64.4	34.4	120.7	34.8	178	166.1	168.3	205.4		High	High	High	High	High	High	High	High	High	High	High	7.602e-06	3.85e-06	1.83	16.96	Used	Used	-.MATSLSVEK.T	[1-9]
	FALSE	High	[-].MATSLSVEKTTSGR.[E]	1xMet-loss+Acetyl [N-Term]	3.8322e-08	5.15092e-05	1	1	9	731325197	731325197 [1-14]	731325197 1xMet-loss+Acetyl [N-Term]	1	1378.72						86.1	201.7	263	176.9	272.3		Not Found	Not Found	Not Found	Not Found	Not Found	High	High	High	High	High	High	7.602e-06	1.068e-10	3.71	14.21	Used	Used	-.MATSLSVEKTTSGR.E	[1-14]
	FALSE	High	[-].MATSLSVEKTTSGR.[E]	1xGG [K/S/T]; 1xMet-loss+Acetyl [N-Term]	2.85185e-08	5.15092e-05	1	1	43	731325197	731325197 [1-14]	731325197 1xMet-loss+Acetyl [N-Term]	1	1492.76	223.4	72.6	261.3	63.9	62.4	26.7	88.6	38.6	111.9	50.4		High	High	High	High	High	High	High	High	High	High	High	7.602e-06	7.497e-11	2.65	13.44	Used	Used	-.MATSLSVEKTTSGR.E	[1-14]
	FALSE	High	[-].MATSLSVEKTTSGREYK.[V]	1xMet-loss+Acetyl [N-Term]	1.62796e-08	5.15092e-05	1	1	11	731325197	731325197 [1-17]	731325197 1xMet-loss+Acetyl [N-Term]	2	1798.92						139.1	224.3	340.3	83.7	212.6		Not Found	Not Found	Not Found	Not Found	Not Found	High	High	High	High	High	High	7.602e-06	3.851e-11	4.78	13.56	Used	Used	-.MATSLSVEKTTSGREYK.V	[1-17]
	FALSE	High	[-].MATSLSVEKTTSGREYK.[V]	1xGG [K9]; 1xMet-loss+Acetyl [N-Term]	4.29594e-07	5.15092e-05	1	1	5	731325197	731325197 [1-17]	731325197 1xMet-loss+Acetyl [N-Term]	2	1912.96	81.7	35		19.4	52.8	23.8	289.7	164.4	190.9	142.1		Peak Found	Peak Found	Not Found	Peak Found	Peak Found	Peak Found	Peak Found	High	High	High	High	7.602e-06	1.953e-09	3.63	13.67	Used	Used	-.MATSLSVEKTTSGREYK.V	[1-17]
	FALSE	High	[K].MKNNAIVCNIGHFDNEIDMHGLETYPGIK.[R]	1xCarbamidomethyl [C8]	4.52992e-07	5.15092e-05	1	1	6	731325197	731325197 [341-369]		1	3330.57		307.2	29.9	15.5	280.9	14.3	29.7	24.9	200.5	97.1		Not Found	High	Peak Found	Peak Found	Peak Found	High	Peak Found	Peak Found	High	High	High	7.602e-06	2.082e-09	3.09	103.84	Used	Used	K.MKNNAIVCNIGHFDNEIDMHGLETYPGIK.R	[341-369]
	FALSE	High	[K].MKNNAIVCNIGHFDNEIDMHGLETYPGIKR.[I]	1xCarbamidomethyl [C8]	3.1857e-13	5.15092e-05	1	1	23	731325197	731325197 [341-370]		2	3486.67	24.8	51.1	7.4	4.9	0.4	428.7	146.7	190.1	35.2	110.7		High	High	Peak Found	Peak Found	Peak Found	High	High	High	High	High	High	7.602e-06	1.358e-16	6.99	42.84	Used	Used	K.MKNNAIVCNIGHFDNEIDMHGLETYPGIKR.I	[341-370]
	FALSE	High	[K].MKNNAIVCNIGHFDNEIDMHGLETYPGIKR.[I]	1xCarbamidomethyl [C8]; 2xOxidation [M1; M19]	0.000938238	5.15092e-05	1	1	1	731325197	731325197 [341-370]		2	3518.66						835.5		126.5	38			Not Found	Not Found	Not Found	Not Found	Not Found	High	Not Found	Peak Found	Peak Found	Not Found	High	7.602e-06	1.959e-05	2.4	42.68	Used	Used	K.MKNNAIVCNIGHFDNEIDMHGLETYPGIKR.I	[341-370]
	FALSE	High	[K].NNAIVCNIGHFDNEIDMHGLETYPGIK.[R]	1xCarbamidomethyl [C6]	1.25605e-11	5.15092e-05	1	1	21	731325197	731325197 [343-369]		0	3071.43	178.3	133.9	44.1	67.9	212.1	99.4	73.3	52.2	55.4	83.4		High	High	High	High	High	Peak Found	High	High	High	High	High	7.602e-06	8.17e-15	5.47	109.55	Used	Used	K.NNAIVCNIGHFDNEIDMHGLETYPGIK.R	[343-369]
	FALSE	High	[K].NNAIVCNIGHFDNEIDMHGLETYPGIKR.[I]	1xCarbamidomethyl [C6]	1.67411e-12	5.15092e-05	1	1	61	731325197	731325197 [343-370]		1	3227.54	173.2	119	35.2	49.9	54.6	249.1	133	73.9	60.1	52		High	High	High	High	High	High	High	High	High	High	High	7.602e-06	8.632e-16	6.98	44.9	Used	Used	K.NNAIVCNIGHFDNEIDMHGLETYPGIKR.I	[343-370]
	FALSE	High	[K].NNAIVCNIGHFDNEIDMHGLETYPGIKR.[I]	1xCarbamidomethyl [C6]; 1xOxidation [M17]	5.99559e-07	5.15092e-05	1	1	2	731325197	731325197 [343-370]		1	3243.53						958.2	14.8			27.1		Not Found	Not Found	Not Found	Not Found	Not Found	High	Peak Found	Not Found	Not Found	Peak Found	High	7.602e-06	2.915e-09	4.09	95.41	Used	Used	K.NNAIVCNIGHFDNEIDMHGLETYPGIKR.I	[343-370]
	FALSE	High	[K].RITIKPQTDR.[F]		0.151579	0.00489215	1	1	5	731325197	731325197 [370-379]		1	1227.72	325.1	496.8	16.8	159						2.3		High	High	Peak Found	High	Not Found	Not Found	Not Found	Not Found	Not Found	Peak Found	High	0.0007324	0.01352	2.75	90.98	Used	Used	K.RITIKPQTDR.F	[370-379]
	FALSE	High	[K].RITIKPQTDRFVFPETK.[S]		2.25884e-05	5.15092e-05	1	1	14	731325197	731325197 [370-386]		2	2076.16		56.9	41.9	18.1		144.7	304	155.1	177.3	102		Not Found	Peak Found	Peak Found	Peak Found	Not Found	High	High	High	High	High	High	7.602e-06	2.265e-07	4.04	22.12	Used	Used	K.RITIKPQTDRFVFPETK.S	[370-386]
	FALSE	High	[K].RLYQMQANGTLLFPAINVNDSVTK.[S]		4.22141e-11	5.15092e-05	1	1	7	731325197	731325197 [214-237]		1	2693.41	37.6	97.3	19	152.8		58.5		302	83.8	248.9		High	Peak Found	Peak Found	Peak Found	Not Found	High	High	High	High	High	High	7.602e-06	3.15e-14	5.01	54.55	Used	Used	K.RLYQMQANGTLLFPAINVNDSVTK.S	[214-237]
	FALSE	High	[K].SGKIPDPTSTDNVEFQLVLGLIK.[E]		1.8778e-10	5.15092e-05	1	1	35	731325197	731325197 [162-184]		1	2471.34	249.2	106.8	127.5	82.3	214.3	66.2	37.8	44.6	47.1	24.3		High	High	High	High	High	High	High	High	High	High	High	7.602e-06	1.819e-13	6.75	113.17	Used	Used	K.SGKIPDPTSTDNVEFQLVLGLIK.E	[162-184]
	FALSE	High	[K].SGKIPDPTSTDNVEFQLVLGLIKESLK.[V]		7.33491e-12	5.15092e-05	1	1	9	731325197	731325197 [162-188]		2	2928.59	66.7	26.8	65.4	32.7	120	206.3	106.1	67.1	83.1	225.9		Peak Found	Peak Found	Peak Found	Peak Found	Peak Found	High	High	High	Peak Found	High	High	7.602e-06	4.481e-15	5.54	105.78	Used	Used	K.SGKIPDPTSTDNVEFQLVLGLIKESLK.V	[162-188]
	FALSE	High	[K].SGVIILAEGR.[L]		2.66852e-05	5.15092e-05	1	1	104	731325197	731325197 [387-396]		0	1014.59	83.6	45.9	58.7	91	35.1	100.1	156.7	138.9	146.1	144.1		High	High	High	High	High	High	High	High	High	High	High	7.602e-06	2.757e-07	3.18	22.12	Used	Used	K.SGVIILAEGR.L	[387-396]
	FALSE	High	[K].SKFDNLYGCR.[H]	1xCarbamidomethyl [C9]	8.25098e-05	5.15092e-05	1	1	107	731325197	731325197 [238-247]		1	1259.58	26.8	67.3	18.5	44	106.7	160.3	183.4	107.1	151	134.8		High	High	High	High	High	High	High	High	High	High	High	7.602e-06	1.069e-06	1.63	9.65	Used	Used	K.SKFDNLYGCR.H	[238-247]
	FALSE	High	[R].TEFGPSQPFK.[G]		0.000135006	5.15092e-05	1	1	91	731325197	731325197 [46-55]		0	1137.56	42.1	284.1	308.3	161.2	27.4	37.7	27.3	50.6	44.4	17		High	High	High	High	High	Peak Found	High	Peak Found	High	Peak Found	High	7.602e-06	1.929e-06	2.32	81.93	Used	Used	R.TEFGPSQPFK.G	[46-55]
	FALSE	High	[R].TEFGPSQPFKGAK.[I]		7.99583e-07	5.15092e-05	1	1	41	731325197	731325197 [46-58]		1	1393.71	24.1	35.7	11.7	45.9	11	155.6	251.3	128.3	191.9	144.4		High	High	High	High	High	High	High	High	High	High	High	7.602e-06	4.106e-09	3.08	9.51	Used	Used	R.TEFGPSQPFKGAK.I	[46-58]
	FALSE	High	[R].TEFGPSQPFKGAK.[I]	1xGG [K10]	0.0300903	0.000805946	1	1	2	731325197	731325197 [46-58]		1	1507.75	73.4	6.5	58.7	64.6	12.5	27.1	287.5	80.3	275.4	113.9		Peak Found	Peak Found	Peak Found	Peak Found	Peak Found	Peak Found	Peak Found	Peak Found	High	High	High	0.0001365	0.001138	2.51	13.19	Used	Used	R.TEFGPSQPFKGAK.I	[46-58]
	FALSE	High	[K].VAALHLNK.[L]		0.00258476	0.000100671	1	1	20	731325197	731325197 [449-456]		0	865.525	185	34.9	132.9	213.5	303.1	36.9	32.2	36.1	15.9	9.5		High	High	High	High	High	High	Peak Found	High	High	Peak Found	High	1.369e-05	6.531e-05	1.72	104.89	Used	Used	K.VAALHLNK.L	[449-456]
	FALSE	High	[K].VAALHLNKLGAK.[L]		0.000118693	5.15092e-05	1	1	10	731325197	731325197 [449-460]		1	1234.76	14.3	1.4	8.9	2.2	9.1	135.8	370.8	191.3	150.2	116.1		Peak Found	Peak Found	Peak Found	Peak Found	Peak Found	Peak Found	High	High	High	High	High	7.602e-06	1.655e-06	1.83	8.52	Used	Used	K.VAALHLNKLGAK.L	[449-460]
	FALSE	High	[K].VGVVCGYGDVGK.[G]	1xCarbamidomethyl [C5]	2.85352e-07	5.15092e-05	1	1	38	731325197	731325197 [266-277]		0	1209.59	161.1	26.6	174.1	205.3	50.6	32.8	85.3	75.6	101.2	87.4		High	High	High	High	High	High	High	High	High	High	High	7.602e-06	1.195e-09	3.02	17.37	Used	Used	K.VGVVCGYGDVGK.G	[266-277]
	FALSE	High	[K].VGVVCGYGDVGKGCALALK.[A]	2xCarbamidomethyl [C5; C14]	5.79956e-12	5.15092e-05	1	1	33	731325197	731325197 [266-284]		1	1922.98	28.7	31	8	38.5	7.7	84.5	131.6	255.4	137.7	276.8		High	High	Peak Found	High	High	High	High	High	High	High	High	7.602e-06	3.442e-15	5.92	27.42	Used	Used	K.VGVVCGYGDVGKGCALALK.A	[266-284]
	FALSE	High	[K].VGVVCGYGDVGKGCALALKAAGAR.[V]	2xCarbamidomethyl [C5; C14]	4.90629e-13	5.15092e-05	1	1	5	731325197	731325197 [266-289]		2	2349.22						15.4	316.2	568.2	75	25.1		Not Found	Not Found	Not Found	Not Found	Not Found	Peak Found	High	Peak Found	High	High	High	7.602e-06	2.197e-16	6.38	30.7	Used	Used	K.VGVVCGYGDVGKGCALALKAAGAR.V	[266-289]
	FALSE	High	[K].VKDMSQADFGR.[L]		0.000628159	5.15092e-05	1	1	4	731325197	731325197 [18-28]		1	1253.59	45.5		155.8	93.4		360.7		95.8	130.7	118.1		High	Not Found	High	High	Not Found	High	Not Found	Peak Found	Peak Found	Peak Found	High	7.602e-06	1.214e-05	2.38	8.43	Used	Used	K.VKDMSQADFGR.L	[18-28]
	FALSE	High	[K].VKDMSQADFGRLEIELAEVEMPGLVSCR.[T]	1xCarbamidomethyl [C27]	3.32604e-17	5.15092e-05	1	1	36	731325197	731325197 [18-45]		2	3179.55	257.6	46.4	34.3	50.2	221	100.7	59.9	96.9	84.4	48.6		High	High	High	High	High	High	High	High	High	High	High	7.602e-06	4.977e-21	6.42	112.32	Used	Used	K.VKDMSQADFGRLEIELAEVEMPGLVSCR.T	[18-45]
	FALSE	High	[K].VKDMSQADFGRLEIELAEVEMPGLVSCR.[T]	1xCarbamidomethyl [C27]; 1xOxidation [M21]	0.000725339	5.15092e-05	1	1	2	731325197	731325197 [18-45]		2	3195.55	82	41.6	81.2	61.2	419.6	20.4	49.7	49.3	24.4	170.6		Peak Found	Peak Found	Peak Found	Peak Found	High	Peak Found	Peak Found	Peak Found	Peak Found	High	High	7.602e-06	1.447e-05	4.89	109.39	Used	Used	K.VKDMSQADFGRLEIELAEVEMPGLVSCR.T	[18-45]
	FALSE	High	[R].VIVTEIDPICALQALMEGFQILTLEDVLAEGDIFVTTTGNK.[D]	1xCarbamidomethyl [C10]	1.09085e-06	5.15092e-05	1	1	1	731325197	731325197 [290-330]		0	4477.31											No Quan Values	High	Not Found	Not Found	Not Found	Not Found	Not Found	Not Found	Not Found	Not Found	Not Found	High	7.602e-06	5.978e-09	3.25		Not Used	Not Used	R.VIVTEIDPICALQALMEGFQILTLEDVLAEGDIFVTTTGNK.D	[290-330]
	FALSE	High	[K].VYVLPK.[H]		0.149634	0.00485452	1	1	30	731325197	731325197 [438-443]		0	718.45	35.2	9	96.6	54.7		147.1	202.1	183	177.9	94.4		High	High	High	High	Not Found	High	High	High	High	High	High	0.0007241	0.01323	1.21	9.91	Used	Used	K.VYVLPK.H	[438-443]
	FALSE	High	[R].WCSCNIFSTQDHAAAAIAR.[D]	2xCarbamidomethyl [C2; C4]	1.45052e-11	5.15092e-05	1	1	53	731325197	731325197 [85-103]		0	2178.98	120.8	197.7	36.1	75.6	297	49.7	55.7	36	49.2	82.3		Peak Found	High	High	High	High	High	High	High	High	High	High	7.602e-06	9.636e-15	4.46	106.06	Used	Used	R.WCSCNIFSTQDHAAAAIAR.D	[85-103]
FALSE		High	Master Protein	6432377164112063413	3107	731330156	PREDICTED: heat shock cognate protein 80 [Beta vulgaris subsp. vulgaris]	MAEAETFAFQAEINQLLSLIINTFYSNKEIFLRELISNSSDALDKIRFEGLTDKSKLEAQPELFIHIVPDKTNNSLTIIDSGIGMTKADLVNNLGTIARSGTKEFMEALAAGADVSMIGQFGVGFYSAYLVAEKVIVTTKHNDDEQYVWESQAGGSFTVTRDTTGEPLGRGTKMTLYLKEDQLEYLEERRLKDLIKKHSEFISYPISLWVEKTIEKEISDDEEEEEKKDEEGKVEDVDEEKEKEEKKKKKIKEVSNEWSLVNKQKPIWMRKPEEITKEEYAAFYKSLTNDWEEHLQVKHFSVEGQLEFKAVLFVPKRAPFDLFDTKKKPNNIKLYVRRVFIMDNCEELIPEYLSFVKGIVDSEDLPLNISRETLQQNKILKVIRKNLVKKCVELFFEIA…	>gi|731330156|ref|XP_010675973.1| PREDICTED: heat shock cognate protein 80 [Beta vulgaris subsp. vulgaris]	0	1024.27	72	73	1581	56	57	698	80	5.06	3374.08	72	1581	73	19	98.5	84.6	102.2	124.5	106.6	110.8	92.3	87.6	93.6	99.3	8.38406e+08	5.92631e+08	5.1332e+08	8.05271e+08	1.19425e+09	4.17395e+08	7.7241e+08	8.03516e+08	1.00468e+09	1.82405e+09	1.80968e+09	1.55519e+09	1.87846e+09	2.28806e+09	1.95814e+09
	Checked	Confidence	Annotated Sequence	Modifications	Qvality PEP	Qvality q-value	# Protein Groups	# Proteins	# PSMs	Master Protein Accessions	Positions in Master Proteins	Modifications in Master Proteins	# Missed Cleavages	Theo. MH+ [Da]	Abundances (Scaled): F1: Control	Abundances (Scaled): F2: Control	Abundances (Scaled): F3: Control	Abundances (Scaled): F4: Control	Abundances (Scaled): F5: Control	Abundances (Scaled): F6: Sample	Abundances (Scaled): F7: Sample	Abundances (Scaled): F8: Sample	Abundances (Scaled): F9: Sample	Abundances (Scaled): F10: Sample	Quan Info	Found in Sample: [S1] F1: Control	Found in Sample: [S2] F2: Control	Found in Sample: [S3] F3: Control	Found in Sample: [S4] F4: Control	Found in Sample: [S5] F5: Control	Found in Sample: [S6] F6: Sample	Found in Sample: [S7] F7: Sample	Found in Sample: [S8] F8: Sample	Found in Sample: [S9] F9: Sample	Found in Sample: [S10] F10: Sample	Confidence (by Search Engine): Sequest HT	Percolator q-Value (by Search Engine): Sequest HT	Percolator PEP (by Search Engine): Sequest HT	XCorr (by Search Engine): Sequest HT	Top Apex RT [min]	Quan Usage	Quan Ratio Usage	Sequence in Protein	Positions in Proteins
	FALSE	High	[K].ADLVNNLGTIAR.[S]		6.18007e-07	5.15092e-05	2	2	63	731321951; 731330156	731321951 [93-104]; 731330156 [88-99]		0	1256.7	33.5	20.3	101.3	197.2	20.9	67.4	97.2	203.2	99.7	159.4	Shared	High	High	High	High	High	High	High	High	High	High	High	7.602e-06	3.024e-09	2.68	29	Used	Used	K.ADLVNNLGTIAR.S	[88-99]
	FALSE	High	[R].APFDLFDTK.[K]		0.000423708	5.15092e-05	1	1	7	731330156	731330156 [318-326]		0	1053.53	136.9	60.5	129	262.3	183.7	45.6	6.2	55.5	38.7	81.7		High	Peak Found	Peak Found	High	High	High	Peak Found	Peak Found	High	Peak Found	High	7.602e-06	7.589e-06	2.29	98.75	Used	Used	R.APFDLFDTK.K	[318-326]
	FALSE	High	[K].AQALRDSSMAGYMSSK.[K]		7.63153e-09	5.15092e-05	1	1	13	731330156	731330156 [587-602]		1	1702.79	12.3	14.9	65.1	14.4	90.4	331.6	149.4	149.5	113	59.4		Peak Found	Peak Found	Peak Found	Peak Found	Peak Found	High	High	High	High	High	High	7.602e-06	1.54e-11	2.86	15.68	Used	Used	K.AQALRDSSMAGYMSSK.K	[587-602]
	FALSE	High	[K].AQALRDSSMAGYMSSKK.[T]		5.42366e-10	5.15092e-05	1	1	19	731330156	731330156 [587-603]		2	1830.88						223.5	247.3	163.9	164.3	201		Not Found	Not Found	Not Found	Not Found	Not Found	High	High	High	High	High	High	7.602e-06	6.458e-13	5.47	13.17	Used	Used	K.AQALRDSSMAGYMSSKK.T	[587-603]
	FALSE	High	[K].AVENSPFLER.[L]		0.00120439	5.15092e-05	2	2	30	731321951; 731330156	731321951 [477-486]; 731330156 [472-481]		0	1161.59	12.2	23	154.2	110.9	45.2	107.2	116.8	119.3	131.9	179.4	Shared	High	High	High	High	High	High	High	High	High	High	High	7.602e-06	2.643e-05	1.41	20.39	Used	Used	K.AVENSPFLER.L	[472-481]
	FALSE	High	[K].AVENSPFLERLK.[K]		0.0147848	0.000377453	2	2	2	731321951; 731330156	731321951 [477-488]; 731330156 [472-483]		1	1402.77	118.3		75.4		37.1		118.6	426.1	70	154.6	Shared	Peak Found	Not Found	Peak Found	Not Found	Peak Found	High	Peak Found	High	Peak Found	Peak Found	High	7.112e-05	0.0004846	1.56	25.26	Used	Used	K.AVENSPFLERLK.K	[472-483]
	FALSE	High	[K].AVLFVPK.[R]		0.0144578	0.000377453	1	1	22	731330156	731330156 [310-316]		0	773.492	143.6	90.6	72.9	251.2	63.3	64.3	67.6	79.9	66.3	100.4		High	High	High	High	High	High	High	High	High	High	High	7.112e-05	0.0004738	0.9	21.86	Used	Used	K.AVLFVPK.R	[310-316]
	FALSE	High	[K].DLVLLLHETALLTSGFSLDDPNTFGNR.[I]		2.5425e-10	5.15092e-05	1	1	22	731330156	731330156 [632-658]		0	2958.52	247.5	226.6	23.3	147	36.8	102.4	32.9	52.2	80.2	51.1		High	High	High	High	Peak Found	High	High	High	High	High	High	7.602e-06	2.605e-13	4.91	104.34	Used	Used	K.DLVLLLHETALLTSGFSLDDPNTFGNR.I	[632-658]
	FALSE	High	[R].DSSMAGYMSSK.[K]		8.56504e-06	5.15092e-05	1	1	31	731330156	731330156 [592-602]		0	1163.47	34.8	6.4	183	123.9	34.5	76.7	127.3	116.1	154.5	142.8		High	High	High	High	High	High	High	High	High	High	High	7.602e-06	7.066e-08	1.83	16.09	Used	Used	R.DSSMAGYMSSK.K	[592-602]
	FALSE	High	[R].DSSMAGYMSSK.[K]	1xOxidation [M]	0.000308265	5.15092e-05	1	1	4	731330156	731330156 [592-602]		0	1179.47	49.1	14.7	502	125.2	233.9	62.3		1.3		11.5		Peak Found	Peak Found	High	High	High	Peak Found	Not Found	Peak Found	Not Found	Peak Found	High	7.602e-06	5.174e-06	1.97	11.51	Used	Used	R.DSSMAGYMSSK.K	[592-602]
	FALSE	High	[R].DSSMAGYMSSKK.[T]		1.85391e-06	5.15092e-05	1	1	10	731330156	731330156 [592-603]		1	1291.57	1.4	3.8	42.4		0.8	282.3	168.5	212.9	181.6	106.2		Peak Found	Peak Found	Peak Found	Not Found	Peak Found	High	High	High	High	Peak Found	High	7.602e-06	1.122e-08	2.2	9.04	Used	Used	R.DSSMAGYMSSKK.T	[592-603]
	FALSE	High	[R].DTTGEPLGR.[G]		0.00422165	0.000100671	1	1	11	731330156	731330156 [162-170]		0	945.464	121.3	59.2	198.7	237.6	204.5	61.3	58.7	18.7	19.8	20.2		High	Peak Found	High	High	High	Peak Found	Peak Found	Peak Found	Peak Found	Peak Found	High	1.369e-05	0.0001161	2	8.67	Used	Used	R.DTTGEPLGR.G	[162-170]
	FALSE	High	[K].DVLGDKVEK.[V]		0.0124527	0.000286933	2	2	2	731321951; 731330156	731321951 [554-562]; 731330156 [548-556]		1	1002.55	537.8	177.4	40.8	105.5		91.2		32.5	7.2	7.6	Shared	High	High	Peak Found	Peak Found	Not Found	Peak Found	Not Found	Peak Found	Peak Found	Peak Found	High	6.08e-05	0.0003983	1.64	88.31	Used	Used	K.DVLGDKVEK.V	[548-556]
	FALSE	High	[K].EDQLEYLEER.[R]		0.000453592	5.15092e-05	2	2	12	731321951; 731330156	731321951 [185-194]; 731330156 [180-189]		0	1323.61	34.9	60.4	180.4	392	118.7	78.8	13.3	27.7	48.9	44.9	Shared	High	High	High	High	High	High	Peak Found	Peak Found	High	High	High	7.602e-06	8.251e-06	1.71	25.76	Used	Used	K.EDQLEYLEER.R	[180-189]
	FALSE	High	[K].EGQNDIFYITGETK.[K]		3.779e-06	5.15092e-05	1	1	8	731330156	731330156 [457-470]		0	1614.76			67.9	172.1	86.6	52.9	116	188.3	127.9	188.2		Not Found	Not Found	High	Peak Found	High	Peak Found	High	High	High	High	High	7.602e-06	2.643e-08	2.56	35.57	Used	Used	K.EGQNDIFYITGETK.K	[457-470]
	FALSE	High	[R].ELISNSSDALDK.[I]		4.33355e-05	5.15092e-05	2	2	4	731321951; 731330156	731321951 [39-50]; 731330156 [34-45]		0	1291.64	80		433.2	420.9	25.1					40.9	Shared	High	Not Found	High	High	High	Not Found	Not Found	Not Found	Not Found	Peak Found	High	7.602e-06	4.933e-07	1.46	12.72	Used	Used	R.ELISNSSDALDK.I	[34-45]
	FALSE	High	[R].ELISNSSDALDKIR.[F]		2.91741e-08	5.15092e-05	2	2	30	731321951; 731330156	731321951 [39-52]; 731330156 [34-47]		1	1560.82	104.8	106.9	114.7	105.8	402.3	41.8	19.2	24.5	30.1	49.9	Shared	High	High	High	High	High	High	Peak Found	Peak Found	High	High	High	7.602e-06	7.754e-11	3.05	105.07	Used	Used	R.ELISNSSDALDKIR.F	[34-47]
	FALSE	High	[R].ELISNSSDALDKIRFEGLTDK.[S]		1.34785e-07	5.15092e-05	1	1	7	731330156	731330156 [34-54]		2	2351.21	138.7	8.9	373.4	244.2	102.2		47.9	3.6	61.7	19.5		High	Peak Found	High	High	High	Not Found	Peak Found	Peak Found	High	Peak Found	High	7.602e-06	4.826e-10	4.74	107.06	Used	Used	R.ELISNSSDALDKIRFEGLTDK.S	[34-54]
	FALSE	High	[K].EVSNEWSLVNK.[Q]		9.17416e-05	5.15092e-05	1	1	24	731330156	731330156 [253-263]		0	1304.65	55.7	39	123.4	166.5	44.5	104.9	95.3	80.4	105.9	184.3		High	High	High	High	High	High	High	High	High	High	High	7.602e-06	1.215e-06	2.13	27.52	Used	Used	K.EVSNEWSLVNK.Q	[253-263]
	FALSE	High	[K].FEGLCK.[V]	1xCarbamidomethyl [C5]	0.0839302	0.00215295	1	1	5	731330156	731330156 [539-544]		0	753.36	62.9	128.7	611.7	104	11	54.6		27.1				High	Peak Found	High	High	Peak Found	Peak Found	Not Found	Peak Found	Not Found	Not Found	High	0.0003095	0.004891	1.49	9.12	Used	Used	K.FEGLCK.V	[539-544]
	FALSE	High	[R].FEGLTDK.[S]		0.00909297	0.000194547	1	1	8	731330156	731330156 [48-54]		0	809.404	130.1	16.2	482.7	337	17	5.9		1.2	6.4	3.6		High	Peak Found	High	High	Peak Found	Peak Found	Not Found	Peak Found	Peak Found	Peak Found	High	4.426e-05	0.0002791	1.1	11.29	Used	Used	R.FEGLTDK.S	[48-54]
	FALSE	High	[K].GIVDSEDLPLNISR.[E]		9.21753e-10	5.15092e-05	1	1	44	731330156	731330156 [358-371]		0	1527.8	35.2	13.8	84.2	154.3	64.6	56.4	131.9	171.6	144	144		High	High	High	High	High	High	High	High	High	High	High	7.602e-06	1.219e-12	3.28	39.71	Used	Used	K.GIVDSEDLPLNISR.E	[358-371]
	FALSE	High	[K].GYEVLYMVDAIDEYAVGQLK.[E]		3.47072e-09	5.15092e-05	2	2	5	731321951; 731330156	731321951 [491-510]; 731330156 [486-505]		0	2276.12	57.3	204.7	328.5	50.1	90.5	20.4		159.5	59.1	29.8	Shared	Peak Found	High	High	Peak Found	Peak Found	Peak Found	Not Found	Peak Found	Peak Found	Peak Found	High	7.602e-06	5.981e-12	3.68	108.3	Used	Used	K.GYEVLYMVDAIDEYAVGQLK.E	[486-505]
	FALSE	High	[K].GYEVLYMVDAIDEYAVGQLKEFEGK.[K]		2.741e-11	5.15092e-05	1	1	15	731330156	731330156 [486-510]		1	2866.39	102	151.5	214.1	53.5	40.5	107.9	99.7	95.4	95.6	39.8		Peak Found	Peak Found	High	High	High	High	High	High	High	High	High	7.602e-06	1.95e-14	4.63	109.66	Used	Used	K.GYEVLYMVDAIDEYAVGQLKEFEGK.K	[486-510]
	FALSE	High	[K].GYEVLYMVDAIDEYAVGQLKEFEGKK.[L]		9.36376e-09	5.15092e-05	1	1	4	731330156	731330156 [486-511]		2	2994.48	27.1	4.9	64.8	36.7	209.8	78.8	363.7	28.8	71	114.4		Peak Found	Peak Found	Peak Found	Peak Found	Peak Found	Peak Found	High	High	High	High	High	7.602e-06	1.982e-11	5.32	110.59	Used	Used	K.GYEVLYMVDAIDEYAVGQLKEFEGKK.L	[486-511]
	FALSE	High	[K].HFSVEGQLEFK.[A]		4.99878e-07	5.15092e-05	2	2	11	731321951; 731330156	731321951 [304-314]; 731330156 [299-309]		0	1320.66	341	452.2	71.8	52.3		22.1	8.6	30.5	6.3	15.2	Shared	High	High	High	High	Not Found	High	Peak Found	High	Peak Found	High	High	7.602e-06	2.334e-09	3.52	96.15	Used	Used	K.HFSVEGQLEFK.A	[299-309]
	FALSE	High	[K].HNDDEQYVWESQAGGSFTVTR.[D]		4.63134e-08	5.15092e-05	1	1	3	731330156	731330156 [141-161]		0	2426.06	491.1	305.3		203.6								High	High	Not Found	High	Not Found	Not Found	Not Found	Not Found	Not Found	Not Found	High	7.602e-06	1.342e-10	2.52	93.56	Used	Used	K.HNDDEQYVWESQAGGSFTVTR.D	[141-161]
	FALSE	High	[K].HSEFISYPISLWVEK.[T]		1.89208e-10	5.15092e-05	1	1	79	731330156	731330156 [198-212]		0	1834.94	181.3	140.1	114.9	134.5	135	108.9	43.6	34.4	52.7	54.6		High	High	High	High	High	High	High	High	High	High	High	7.602e-06	1.834e-13	4.23	104.26	Used	Used	K.HSEFISYPISLWVEK.T	[198-212]
	FALSE	High	[K].KAVENSPFLER.[L]		7.99114e-08	5.15092e-05	2	2	50	731321951; 731330156	731321951 [476-486]; 731330156 [471-481]		1	1289.68	18.2	41.8	32.7	51.5	152.3	270.6	133.5	110	121.3	67.9	Shared	High	High	High	High	High	High	High	High	High	High	High	7.602e-06	2.578e-10	3.71	9.39	Used	Used	K.KAVENSPFLER.L	[471-481]
	FALSE	High	[K].KAVENSPFLER.[L]	1xGG [S6]	0.0117299	0.000239412	2	2	1	731321951; 731330156	731321951 [476-486]; 731330156 [471-481]		1	1403.73				25.8			373.3	143.9	290.4	166.5	Shared	Not Found	Not Found	Not Found	Peak Found	Not Found	Not Found	Peak Found	High	Peak Found	Peak Found	High	5.511e-05	0.0003707	1.92	13.66	Used	Used	K.KAVENSPFLER.L	[471-481]
	FALSE	High	[K].KAVENSPFLERLK.[K]		0.040592	0.00097306	2	2	2	731321951; 731330156	731321951 [476-488]; 731330156 [471-483]		2	1530.86				60.3		108.3	259.2	315.8	152.1	104.4	Shared	Not Found	Not Found	Not Found	Peak Found	Not Found	High	Peak Found	High	Peak Found	Peak Found	High	0.0001608	0.001681	2.18	21.7	Used	Used	K.KAVENSPFLERLK.K	[471-483]
	FALSE	High	[K].KGYEVLYMVDAIDEYAVGQLK.[E]		1.89653e-06	5.15092e-05	2	2	1	731321951; 731330156	731321951 [490-510]; 731330156 [485-505]		1	2404.21			361.5	550.7					87.8		Shared	Not Found	Not Found	Peak Found	High	Not Found	Not Found	Not Found	Not Found	Peak Found	Not Found	High	7.602e-06	1.157e-08	4.15	105.45	Used	Used	K.KGYEVLYMVDAIDEYAVGQLK.E	[485-505]
	FALSE	High	[K].KGYEVLYMVDAIDEYAVGQLKEFEGK.[K]		2.73618e-14	5.15092e-05	1	1	28	731330156	731330156 [485-510]		2	2994.48	132.9	79.9	213.4	113.2	35	43.3	121.6	90.5	111.2	58.9		High	High	High	High	Peak Found	High	High	High	High	High	High	7.602e-06	8.81e-18	7.88	108.79	Used	Used	K.KGYEVLYMVDAIDEYAVGQLKEFEGK.K	[485-510]
	FALSE	High	[K].KHSEFISYPISLWVEK.[T]		5.95034e-07	5.15092e-05	1	1	39	731330156	731330156 [197-212]		1	1963.03	225.6	180.6	94.5	132.5	8.7	127.5	72.3	19	33.6	105.7		High	High	High	High	Peak Found	High	High	High	High	High	High	7.602e-06	2.874e-09	3.56	103.07	Used	Used	K.KHSEFISYPISLWVEK.T	[197-212]
	FALSE	High	[K].KKGYEVLYMVDAIDEYAVGQLK.[E]		3.80328e-08	5.15092e-05	2	2	1	731321951; 731330156	731321951 [489-510]; 731330156 [484-505]		2	2532.31	15.6	208.1	470.6	284.7			15.7		5.3		Shared	Peak Found	Peak Found	High	Peak Found	Not Found	Not Found	Peak Found	Not Found	Peak Found	Not Found	High	7.602e-06	1.057e-10	4.8	108.27	Used	Used	K.KKGYEVLYMVDAIDEYAVGQLK.E	[484-505]
	FALSE	High	[K].KIKEVSNEWSLVNK.[Q]		0.0183451	0.000413429	1	1	4	731330156	731330156 [250-263]		2	1673.92						328.5	73.6	12.5	108	477.4		Not Found	Not Found	Not Found	Not Found	Not Found	Peak Found	Peak Found	Peak Found	Peak Found	High	High	7.552e-05	0.0006225	2.38	74.13	Used	Used	K.KIKEVSNEWSLVNK.Q	[250-263]
	FALSE	High	[K].KLVSATK.[E]		0.162657	0.00535748	2	2	1	731321951; 731330156	731321951 [516-522]; 731330156 [511-517]		1	746.477	1000										Shared	High	Not Found	Not Found	Not Found	Not Found	Not Found	Not Found	Not Found	Not Found	Not Found	High	0.0008032	0.01545	1.84	88.8	Used	Used	K.KLVSATK.E	[511-517]
	FALSE	High	[R].KPEEITKEEYAAFYK.[S]		1.48299e-12	5.15092e-05	1	1	127	731330156	731330156 [271-285]		1	1845.93	93.1	24.7	37	100.4	242.1	115.3	86.3	107.8	88.8	104.4		High	High	High	High	High	High	High	High	High	High	High	7.602e-06	7.539e-16	4.29	19.76	Used	Used	R.KPEEITKEEYAAFYK.S	[271-285]
	FALSE	High	[K].KTMEINPENPIMEELR.[K]		3.0584e-05	5.15092e-05	1	1	8	731330156	731330156 [603-618]		1	1943.96	129.5	112.3	6.5	61.9	43.3	18.2	361.7	34.9	155.2	76.4		Peak Found	High	Peak Found	High	Peak Found	Peak Found	High	High	Peak Found	High	High	7.602e-06	3.24e-07	4.46	39.67	Used	Used	K.KTMEINPENPIMEELR.K	[603-618]
	FALSE	High	[K].KTMEINPENPIMEELRK.[R]		7.12851e-09	5.15092e-05	1	1	20	731330156	731330156 [603-619]		2	2072.05	139.6	108.6	67.4	110.3	93	68.6	155	56.7	11.4	189.4		High	High	Peak Found	High	Peak Found	High	High	High	High	High	High	7.602e-06	1.43e-11	4.06	30.72	Used	Used	K.KTMEINPENPIMEELRK.R	[603-619]
	FALSE	High	[K].IAEILR.[SY]		0.00929984	0.000239412	1	2	58	731330156	731330156 [430-435]		0	714.451	56.5	37.9	95.3	126	2.8	195.3	127.8	114.2	139.3	104.9		High	High	High	High	High	High	High	High	High	High	High	4.984e-05	0.0002866	1.52	11.35	Used	Used	K.LAELLR.Y	[430-435]
	FALSE	High	[K].LGIHEDTQNR.[N]		0.000170742	5.15092e-05	1	1	19	731330156	731330156 [418-427]		0	1182.59	180.8	158.8	297.8	257.2	15.6	51.5	4.4	17	6.8	10.2		High	High	High	High	High	High	Peak Found	Peak Found	Peak Found	High	High	7.602e-06	2.551e-06	1.79	8.23	Used	Used	K.LGIHEDTQNR.N	[418-427]
	FALSE	High	[K].LGIHEDTQNRNKLAELLR.[Y]		4.77943e-06	5.15092e-05	1	1	7	731330156	731330156 [418-435]		2	2120.16	4.9		26.2		4.8	40.1	240.3	278.7	152.1	252.9		Peak Found	Not Found	Peak Found	Not Found	Peak Found	Peak Found	High	High	High	High	High	7.602e-06	3.517e-08	4.29	26.45	Used	Used	K.LGIHEDTQNRNKLAELLR.Y	[418-435]
	FALSE	High	[K].IKEVSNEWSLVNK.[Q]		3.29145e-09	5.15092e-05	1	1	68	731330156	731330156 [251-263]		1	1545.83	51.8	69.8	35.5	96.7	179.1	70	91.4	121.7	78.1	205.9		High	High	High	High	High	High	High	High	High	High	High	7.602e-06	5.655e-12	3.35	22.64	Used	Used	K.IKEVSNEWSLVNK.Q	[251-263]
	FALSE	High	[K].IKEVSNEWSLVNK.[Q]	1xGG [K2]	0.00262411	0.000100671	1	1	5	731330156	731330156 [251-263]		1	1659.87							294.2	117.2	357	231.6		Not Found	Not Found	Not Found	Not Found	Not Found	Not Found	High	Peak Found	High	High	High	1.369e-05	6.638e-05	2.38	21.26	Used	Used	K.IKEVSNEWSLVNK.Q	[251-263]
	FALSE	High	[K].IKEVSNEWSLVNKQKPIWMR.[K]		1.46499e-07	5.15092e-05	1	1	2	731330156	731330156 [251-270]		2	2485.34						34.2	355.6	289.8	161.1	159.4		Not Found	Not Found	Not Found	Not Found	Not Found	Peak Found	Peak Found	High	Peak Found	High	High	7.602e-06	5.343e-10	3.49	34.83	Used	Used	K.IKEVSNEWSLVNKQKPIWMR.K	[251-270]
	FALSE	High	[R].IMKAQALRDSSMAGYMSSK.[K]		5.39222e-07	5.15092e-05	1	1	5	731330156	731330156 [584-602]		2	2075.01	8.4	33.7	34.6	165.6	12.2	80.6	79.7	371.2	51.7	162.4		Peak Found	Peak Found	Peak Found	Peak Found	Peak Found	High	High	High	Peak Found	High	High	7.602e-06	2.547e-09	3.87	20.61	Used	Used	R.IMKAQALRDSSMAGYMSSK.K	[584-602]
	FALSE	High	[K].IRFEGLTDK.[S]		0.0183451	0.000413429	1	1	2	731330156	731330156 [46-54]		1	1078.59	177.5	475.3	147.8	110.7			3.5	54.2		30.9		Peak Found	High	High	Peak Found	Not Found	Not Found	Peak Found	Peak Found	Not Found	Peak Found	High	7.552e-05	0.0006236	2.13	91.28	Used	Used	K.IRFEGLTDK.S	[46-54]
	FALSE	High	[-].MAEAETFAFQAEINQLLSLIINTFYSNK.[E]	1xMet-loss+Acetyl [N-Term]	1.88111e-07	5.15092e-05	1	1	8	731330156	731330156 [1-28]	731330156 1xMet-loss+Acetyl [N-Term]	0	3117.58		67.6	293.6	273.9	82.8		19	132.3	130.8			High	High	High	High	High	Not Found	Peak Found	Peak Found	High	High	High	7.602e-06	7.207e-10	3.02	107.83	Used	Used	-.MAEAETFAFQAEINQLLSLIINTFYSNK.E	[1-28]
	FALSE	High	[-].MAEAETFAFQAEINQLLSLIINTFYSNKEIFLR.[E]	1xMet-loss+Acetyl [N-Term]	1.30225e-14	5.15092e-05	1	1	29	731330156	731330156 [1-33]	731330156 1xMet-loss+Acetyl [N-Term]	1	3775.96	123.1	104.8	382.5	248.9	18.9	10.8	23	15.6	70.2	2.2		High	High	High	High	High	High	High	High	High	High	High	7.602e-06	3.857e-18	6.35	112.62	Used	Used	-.MAEAETFAFQAEINQLLSLIINTFYSNKEIFLR.E	[1-33]
	FALSE	High	[R].MKEGQNDIFYITGETK.[K]		1.27523e-11	5.15092e-05	1	1	76	731330156	731330156 [455-470]		1	1873.9	97.6	98.9	38.2	128.7	110.5	83.3	157.1	84.6	52.8	148.3		High	High	High	High	High	High	High	High	High	High	High	7.602e-06	8.31e-15	3.91	18.84	Used	Used	R.MKEGQNDIFYITGETK.K	[455-470]
	FALSE	High	[R].MKEGQNDIFYITGETK.[K]	1xOxidation [M1]	0.000389842	5.15092e-05	1	1	4	731330156	731330156 [455-470]		1	1889.89				44.8		222.2	109	254.9	153.9	215.3		Not Found	Not Found	Not Found	Peak Found	Not Found	High	High	Peak Found	Peak Found	High	High	7.602e-06	6.868e-06	2.82	28.74	Used	Used	R.MKEGQNDIFYITGETK.K	[455-470]
	FALSE	High	[R].MKEGQNDIFYITGETKK.[A]		2.75062e-05	5.15092e-05	1	1	19	731330156	731330156 [455-471]		2	2001.99	25.4	70.6	4.3	41.4	80.5	218	93	149.7	131.9	185.3		Peak Found	High	Peak Found	High	High	High	High	High	High	High	High	7.602e-06	2.861e-07	3.08	19.21	Used	Used	R.MKEGQNDIFYITGETKK.A	[455-471]
	FALSE	High	[K].MTLYLK.[E]		0.0685054	0.00157116	1	1	4	731330156	731330156 [174-179]		0	768.432			31.7		23.2	297	115.2	0.7	221	311.3		Not Found	Not Found	Peak Found	Not Found	Peak Found	High	Peak Found	Peak Found	High	High	High	0.0002371	0.003558	1.09	14.61	Used	Used	K.MTLYLK.E	[174-179]
	FALSE	High	[K].MTLYLKEDQLEYLEER.[R]		5.30801e-08	5.15092e-05	1	1	11	731330156	731330156 [174-189]		1	2073.02	267.7	255.2	15.1	106.9	163	90	13.5	28.7	17.2	42.6		High	High	Peak Found	High	High	Peak Found	High	High	Peak Found	High	High	7.602e-06	1.577e-10	4.53	105.03	Used	Used	K.MTLYLKEDQLEYLEER.R	[174-189]
	FALSE	High	[K].MTLYLKEDQLEYLEER.[R]	1xOxidation [M1]	0.000372524	5.15092e-05	1	1	4	731330156	731330156 [174-189]		1	2089.02	13.6					68.6	167.9	23.1	645.9	80.8		Peak Found	Not Found	Not Found	Not Found	Not Found	Peak Found	High	Peak Found	High	High	High	7.602e-06	6.49e-06	1.97	44.8	Used	Used	K.MTLYLKEDQLEYLEER.R	[174-189]
	FALSE	High	[K].MTLYLKEDQLEYLEERR.[L]		2.24179e-05	5.15092e-05	1	1	3	731330156	731330156 [174-190]		2	2229.12						28.8		19.8	312.6	638.9		Not Found	Not Found	Not Found	Not Found	Not Found	Peak Found	Not Found	Peak Found	High	High	High	7.602e-06	2.246e-07	3.46	41.68	Used	Used	K.MTLYLKEDQLEYLEERR.L	[174-190]
	FALSE	High	[K].MTLYLKEDQLEYLEERR.[L]	1xOxidation [M1]	0.040592	0.00097306	1	1	3	731330156	731330156 [174-190]		2	2245.12						583.4	118.8	28.9	175.1	93.8		Not Found	Not Found	Not Found	Not Found	Not Found	High	Peak Found	Peak Found	High	Peak Found	High	0.0001608	0.001674	1.38	43.14	Used	Used	K.MTLYLKEDQLEYLEERR.L	[174-190]
	FALSE	High	[R].NKLAELLR.[Y]		0.166846	0.00562967	1	1	7	731330156	731330156 [428-435]		1	956.589			5.2			101.6	149.7	344.5	180.8	218.1		Not Found	Not Found	Peak Found	Not Found	Not Found	Peak Found	High	High	Peak Found	High	High	0.0008298	0.01607	2.16	22.22	Used	Used	R.NKLAELLR.Y	[428-435]
	FALSE	High	[K].NLKLGIHEDTQNR.[N]		3.75048e-06	5.15092e-05	1	1	4	731330156	731330156 [415-427]		1	1537.81		7.2	16.9		0.1	103	108	192.9	344.5	227.3		Not Found	Peak Found	Peak Found	Not Found	Peak Found	Peak Found	High	Peak Found	High	High	High	7.602e-06	2.629e-08	3.96	8.43	Used	Used	K.NLKLGIHEDTQNR.N	[415-427]
	FALSE	High	[K].QKPIWMR.[K]		0.136593	0.00426318	1	1	31	731330156	731330156 [264-270]		0	958.529	133.4	211.3	94.4	169.7	83.4	25.5	76.2	59.4	127.2	19.5		High	High	High	High	Peak Found	High	Peak Found	High	High	High	High	0.0006204	0.01122	1.58	14.81	Used	Used	K.QKPIWMR.K	[264-270]
	FALSE	High	[K].QKPIWMR.[K]	1xGG [K2]	0.203563	0.00775657	1	1	1	731330156	731330156 [264-270]		0	1072.57						308.5	84.2		61.4	546		Not Found	Not Found	Not Found	Not Found	Not Found	Peak Found	Peak Found	Not Found	Peak Found	High	High	0.001174	0.02329	1.57	18.54	Used	Used	K.QKPIWMR.K	[264-270]
	FALSE	High	[K].RAPFDLFDTK.[K]		1.46669e-05	5.15092e-05	1	1	46	731330156	731330156 [317-326]		1	1209.63	118.7	159	85.8	194.6	101.2	221.3	15	21.2	24.5	58.7		High	High	High	High	High	Peak Found	High	High	High	High	High	7.602e-06	1.345e-07	2.2	106.91	Used	Used	K.RAPFDLFDTK.K	[317-326]
	FALSE	High	[R].RVFIMDNCEELIPEYLSFVK.[G]	1xCarbamidomethyl [C8]	1.20235e-08	5.15092e-05	2	2	39	731321951; 731330156	731321951 [343-362]; 731330156 [338-357]		1	2502.24	263.4	40.8	79.2	76.3	42.8	147.3	105.1	60.2	107.6	77.3	Shared	High	High	High	High	High	High	High	High	High	High	High	7.602e-06	2.661e-11	4.16	102.57	Used	Used	R.RVFIMDNCEELIPEYLSFVK.G	[338-357]
	FALSE	High	[R].RVFIMDNCEELIPEYLSFVK.[G]	1xCarbamidomethyl [C8]; 1xOxidation [M5]	4.99878e-07	5.15092e-05	2	2	1	731321951; 731330156	731321951 [343-362]; 731330156 [338-357]		1	2518.24					851.7	46.8	40.6	28.5	32.5		Shared	Not Found	Not Found	Not Found	Not Found	High	Peak Found	Peak Found	Peak Found	Peak Found	Not Found	High	7.602e-06	2.344e-09	4.96	111.68	Used	Used	R.RVFIMDNCEELIPEYLSFVK.G	[338-357]
	FALSE	High	[K].SEESKEKFEGLCK.[V]	1xCarbamidomethyl [C12]	0.00742477	0.000145442	1	1	1	731330156	731330156 [532-544]		2	1570.74			231.4	768.6								Not Found	Not Found	Peak Found	High	Not Found	Not Found	Not Found	Not Found	Not Found	Not Found	High	3.22e-05	0.0002218	2.03	9	Used	Used	K.SEESKEKFEGLCK.V	[532-544]
	FALSE	High	[K].SGEEMTSLKDYVTR.[M]		3.74388e-09	5.15092e-05	1	1	107	731330156	731330156 [441-454]		1	1615.76	61.5	66.7	67.6	72.7	119.5	87.8	114.3	90.5	101.9	217.7		High	High	High	High	High	High	High	High	High	High	High	7.602e-06	6.543e-12	4.89	17.26	Used	Used	K.SGEEMTSLKDYVTR.M	[441-454]
	FALSE	High	[K].SGEEMTSLKDYVTR.[M]	1xOxidation [M5]	4.1677e-07	5.15092e-05	1	1	19	731330156	731330156 [441-454]		1	1631.76	1	4.8	26.3	49	227.3	323.1	75.1	69.9	119.7	103.6		Peak Found	Peak Found	Peak Found	High	High	High	Peak Found	Peak Found	High	High	High	7.602e-06	1.873e-09	3.77	104.29	Used	Used	K.SGEEMTSLKDYVTR.M	[441-454]
	FALSE	High	[K].SKLEAQPELFIHIVPDKTNNSLTIIDSGIGMTK.[A]		7.58725e-06	5.15092e-05	1	1	5	731330156	731330156 [55-87]		2	3609.92	437.8	256.6		61.4		119.5	16.8	43.4	8.9	55.6		High	High	Not Found	Peak Found	Not Found	Peak Found	Peak Found	High	Peak Found	High	High	7.602e-06	6.083e-08	5.61	113.03	Used	Used	K.SKLEAQPELFIHIVPDKTNNSLTIIDSGIGMTK.A	[55-87]
	FALSE	High	[K].SLTNDWEEHLQVK.[H]		2.98623e-07	5.15092e-05	1	1	40	731330156	731330156 [286-298]		0	1598.78	137.5	164.9	43.3	196.9	283.5	35	20.1	17.7	41.8	59.2		High	High	High	High	High	Peak Found	Peak Found	High	High	High	High	7.602e-06	1.26e-09	2.45	106.92	Used	Used	K.SLTNDWEEHLQVK.H	[286-298]
	FALSE	High	[K].SVKDLVLLLHETALLTSGFSLDDPNTFGNR.[I]		4.44871e-12	5.15092e-05	1	1	23	731330156	731330156 [629-658]		1	3272.72	156.1	91.1	101.6	115.7	44.8	69.2	95.3	128.1	150.8	47.4		High	High	High	High	Peak Found	High	High	High	High	High	High	7.602e-06	2.569e-15	5.7	106.72	Used	Used	K.SVKDLVLLLHETALLTSGFSLDDPNTFGNR.I	[629-658]
	FALSE	High	[K].SVKDLVLLLHETALLTSGFSLDDPNTFGNRIHR.[M]		4.74598e-05	5.15092e-05	1	1	4	731330156	731330156 [629-661]		2	3678.96		389	84.2			33.5	95.5	162.1	231.8	4		Not Found	Peak Found	Peak Found	Not Found	Not Found	Peak Found	High	High	High	High	High	7.602e-06	5.49e-07	3.94	107.81	Used	Used	K.SVKDLVLLLHETALLTSGFSLDDPNTFGNRIHR.M	[629-661]
	FALSE	High	[K].TMEINPENPIMEELR.[K]		5.85741e-08	5.15092e-05	1	1	17	731330156	731330156 [604-618]		0	1815.86		67.9	14	56.8	81.1	100.6	249.3	174.2	152.7	103.5		Not Found	High	Peak Found	High	High	High	High	High	High	High	High	7.602e-06	1.781e-10	2.94	54.51	Used	Used	K.TMEINPENPIMEELR.K	[604-618]
	FALSE	High	[K].TMEINPENPIMEELRK.[R]		2.41401e-08	5.15092e-05	1	1	32	731330156	731330156 [604-619]		1	1943.96	75.9	48.6	24.5	164	200.3	139.6	139.4	29.2	104.4	74		High	Peak Found	High	High	High	High	High	High	High	High	High	7.602e-06	6.13e-11	4.05	39.67	Used	Used	K.TMEINPENPIMEELRK.R	[604-619]
	FALSE	High	[K].TMEINPENPIMEELRK.[R]	1xOxidation [M2]	0.000407964	5.15092e-05	1	1	4	731330156	731330156 [604-619]		1	1959.95										1000		Not Found	Not Found	Not Found	Not Found	Not Found	Not Found	Not Found	Not Found	Not Found	High	High	7.602e-06	7.295e-06	1.77	33.52	Used	Used	K.TMEINPENPIMEELRK.R	[604-619]
	FALSE	High	[K].TMEINPENPIMEELRK.[R]	2xOxidation [M2; M11]	0.00144418	5.15092e-05	1	1	2	731330156	731330156 [604-619]		1	1975.95		56.3	63	16.6	48		397.9	20.6	309.2	88.3		Not Found	Peak Found	Peak Found	Peak Found	Peak Found	Not Found	High	Peak Found	Peak Found	High	High	7.602e-06	3.273e-05	1.07	79.26	Used	Used	K.TMEINPENPIMEELRK.R	[604-619]
	FALSE	High	[K].TMEINPENPIMEELRKR.[A]		4.30085e-05	5.15092e-05	1	1	1	731330156	731330156 [604-620]		2	2100.06			87.7		9			272.4	34.1	596.8		Not Found	Not Found	Peak Found	Not Found	Peak Found	Not Found	Not Found	Peak Found	Peak Found	High	High	7.602e-06	4.898e-07	4.28	40.85	Used	Used	K.TMEINPENPIMEELRKR.A	[604-620]
	FALSE	High	[K].TNNSLTIIDSGIGMTK.[A]		0.00494562	0.000145442	1	1	3	731330156	731330156 [72-87]		0	1664.85				336.7				236.8	408.6	17.9		High	Not Found	Not Found	High	Not Found	Not Found	Not Found	Peak Found	Peak Found	High	High	2.019e-05	0.0001395	0.74	39.3	Used	Used	K.TNNSLTIIDSGIGMTK.A	[72-87]
	FALSE	High	[R].VFIMDNCEELIPEYLSFVK.[G]	1xCarbamidomethyl [C7]	2.98623e-07	5.15092e-05	2	2	30	731321951; 731330156	731321951 [344-362]; 731330156 [339-357]		0	2346.14	184.2	103.5	72.1	113	300.5	88.8	34.5	17.9	57.2	28.3	Shared	High	High	High	High	High	High	High	High	High	High	High	7.602e-06	1.262e-09	2.98	111.3	Used	Used	R.VFIMDNCEELIPEYLSFVK.G	[339-357]
	FALSE	High	[R].VFIMDNCEELIPEYLSFVK.[G]	1xCarbamidomethyl [C7]; 1xOxidation [M4]	5.99559e-07	5.15092e-05	2	2	4	731321951; 731330156	731321951 [344-362]; 731330156 [339-357]		0	2362.13			18.7		486.2	302.7	85.5	21.6	71.4	13.9	Shared	Not Found	Not Found	Peak Found	Not Found	High	High	Peak Found	Peak Found	Peak Found	Peak Found	High	7.602e-06	2.903e-09	3.07	109.36	Used	Used	R.VFIMDNCEELIPEYLSFVK.G	[339-357]
	FALSE	High	[K].VIVTTKHNDDEQYVWESQAGGSFTVTR.[D]		2.85682e-05	5.15092e-05	1	1	3	731330156	731330156 [135-161]		1	3067.48						45.4	468.7	124.9	182.4	178.6		Not Found	Not Found	Not Found	Not Found	Not Found	High	High	High	Peak Found	Peak Found	High	7.602e-06	2.992e-07	2.26	33.09	Used	Used	K.VIVTTKHNDDEQYVWESQAGGSFTVTR.D	[135-161]
	FALSE	High	[K].VMKDVLGDKVEK.[V]		5.03384e-08	5.15092e-05	1	1	31	731330156	731330156 [545-556]		2	1360.75	38.9	52.8	20.7	48.4	115.9	327.7	78.4	92.6	124.1	100.4		High	High	High	High	High	High	High	High	High	High	High	7.602e-06	1.484e-10	2.92	8.19	Used	Used	K.VMKDVLGDKVEK.V	[545-556]
	FALSE	High	[K].VMKDVLGDKVEK.[V]	1xOxidation [M2]	0.21884	0.00887755	1	1	1	731330156	731330156 [545-556]		2	1376.75					1000							Not Found	Not Found	Not Found	Not Found	High	Not Found	Not Found	Not Found	Not Found	Not Found	High	0.001364	0.02648	2.24	106.55	Used	Used	K.VMKDVLGDKVEK.V	[545-556]
	FALSE	High	[R].VVDSPCCLVTGEYGWSANMER.[I]	2xCarbamidomethyl [C6; C7]	4.81578e-06	5.15092e-05	1	1	16	731330156	731330156 [563-583]		0	2430.05	90.7	77.7	15.5	200.2	68.9	52.3	132.2	117.1	135	110.4		High	High	Peak Found	High	High	High	High	High	High	High	High	7.602e-06	3.543e-08	3.31	49.18	Used	Used	R.VVDSPCCLVTGEYGWSANMER.I	[563-583]
	FALSE	High	[K].VVVSDRVVDSPCCLVTGEYGWSANMER.[I]	2xCarbamidomethyl [C12; C13]	1.32524e-10	5.15092e-05	1	1	20	731330156	731330156 [557-583]		1	3085.42	26.4	46.4			27.7	50.8	282.1	175.7	234.5	156.3		High	High	Not Found	Not Found	High	High	High	High	High	High	High	7.602e-06	1.192e-13	3.2	47.34	Used	Used	K.VVVSDRVVDSPCCLVTGEYGWSANMER.I	[557-583]
	FALSE	High	[K].VVVSDRVVDSPCCLVTGEYGWSANMER.[I]	2xCarbamidomethyl [C12; C13]; 1xOxidation [M25]	0.000189843	5.15092e-05	1	1	1	731330156	731330156 [557-583]		1	3101.41					132.1	305.7		251.6		310.6		Not Found	Not Found	Not Found	Not Found	Peak Found	Peak Found	Not Found	Peak Found	Not Found	High	High	7.602e-06	2.896e-06	2.48	48.87	Used	Used	K.VVVSDRVVDSPCCLVTGEYGWSANMER.I	[557-583]
	FALSE	High	[R].YHSTKSGEEMTSLKDYVTR.[M]		2.97922e-11	5.15092e-05	1	1	12	731330156	731330156 [436-454]		2	2232.06	0.8	10.9	5.8	8.1		191.5	13.8	304.6	24.7	439.9		Peak Found	Peak Found	Peak Found	Peak Found	Not Found	Peak Found	High	High	Peak Found	High	High	7.602e-06	2.141e-14	6.07	21.14	Used	Used	R.YHSTKSGEEMTSLKDYVTR.M	[436-454]
	FALSE	High	[R].YHSTKSGEEMTSLKDYVTR.[M]	1xOxidation [M10]	2.41685e-06	5.15092e-05	1	1	1	731330156	731330156 [436-454]		2	2248.06	20.2		32	423		431.9			14.3	78.6		Peak Found	Not Found	Peak Found	Peak Found	Not Found	High	Not Found	Not Found	Peak Found	Peak Found	High	7.602e-06	1.55e-08	3.36	20.34	Used	Used	R.YHSTKSGEEMTSLKDYVTR.M	[436-454]
FALSE		High	Master Protein	5980885327378658522	3005	731321657	PREDICTED: glutamate synthase 1 [NADH], chloroplastic isoform X1 [Beta vulgaris subsp. vulgaris]	MSVAAGVGSVLQIRSKVGSGGIFTNNHTQNDAGGVVLVPSLYRFGRRTSRSYAVRRSEAKICESKFFGNRLRSERLNPLIREPKLRSVIRSALSQVPEQPLGLYDPKYDKDSCGVGFVAELSGESSRKTVTDAVEMLVRMSHRGACGCETNTGDGAGILVGLPHDFYKEVTKDLGFELPPLGQYAVGMFFLPTSESRREESKNVFTKVAESLGHTVLGWRTVPTDNSGLGKSALLTEPVVEQVFLTPTPRSKADFEQQMYILRRVSMVAIRAALNLQHGGVRDFYICSLSSRTVVYKGQLKPSQLKEYYYWDLGNERFTSYMALVHSRFSTNTFPSWDRAQPMRVLGHNGEINTLRGNVNWMRAREGLLKCKELGLSKNEMKKLLPIVDASSSDSGAFD…	>gi|731321657|ref|XP_010671471.1| PREDICTED: glutamate synthase 1 [NADH], chloroplastic isoform X1 [Beta vulgaris subsp. vulgaris]	0	1003.08	65	114	730	10	114	2209	242.8	6.9	1385.57	65	730	114	0	158.9	131.8	98.3	115.9	123.7	100.5	91.6	61.1	50.3	67.9	4.61572e+08	3.14778e+08	1.68399e+08	2.55765e+08	4.73084e+08	1.29208e+08	2.61424e+08	1.91136e+08	1.84094e+08	4.2566e+08	9.96292e+08	8.26046e+08	6.16245e+08	7.26718e+08	7.75689e+08
	Checked	Confidence	Annotated Sequence	Modifications	Qvality PEP	Qvality q-value	# Protein Groups	# Proteins	# PSMs	Master Protein Accessions	Positions in Master Proteins	Modifications in Master Proteins	# Missed Cleavages	Theo. MH+ [Da]	Abundances (Scaled): F1: Control	Abundances (Scaled): F2: Control	Abundances (Scaled): F3: Control	Abundances (Scaled): F4: Control	Abundances (Scaled): F5: Control	Abundances (Scaled): F6: Sample	Abundances (Scaled): F7: Sample	Abundances (Scaled): F8: Sample	Abundances (Scaled): F9: Sample	Abundances (Scaled): F10: Sample	Quan Info	Found in Sample: [S1] F1: Control	Found in Sample: [S2] F2: Control	Found in Sample: [S3] F3: Control	Found in Sample: [S4] F4: Control	Found in Sample: [S5] F5: Control	Found in Sample: [S6] F6: Sample	Found in Sample: [S7] F7: Sample	Found in Sample: [S8] F8: Sample	Found in Sample: [S9] F9: Sample	Found in Sample: [S10] F10: Sample	Confidence (by Search Engine): Sequest HT	Percolator q-Value (by Search Engine): Sequest HT	Percolator PEP (by Search Engine): Sequest HT	XCorr (by Search Engine): Sequest HT	Top Apex RT [min]	Quan Usage	Quan Ratio Usage	Sequence in Protein	Positions in Proteins
	FALSE	High	[K].AFGYSVEALEMLMIPMAK.[D]		1.6928e-06	5.15092e-05	1	3	4	731321657	731321657 [592-609]		0	2000.99	336.3	155.9	218.4	179.9		32.2	25.3	16.5	23.5	12.1		High	High	High	High	Not Found	Peak Found	Peak Found	Peak Found	Peak Found	Peak Found	High	7.602e-06	1.006e-08	2.92	105.33	Used	Used	K.AFGYSVEALEMLMIPMAK.D	[592-609]
	FALSE	High	[R].AFYEYFSALMEPWDGPALITFTDGR.[Y]		1.9824e-08	5.15092e-05	1	3	1	731321657	731321657 [436-460]		0	2897.35											No Quan Values	High	Not Found	Not Found	Not Found	Not Found	Not Found	Not Found	Not Found	Not Found	Not Found	High	7.602e-06	4.849e-11	1.63		Not Used	Not Used	R.AFYEYFSALMEPWDGPALITFTDGR.Y	[436-460]
	FALSE	High	[R].ALPIGSAESVALPNPGDYHWR.[K]		6.37022e-07	5.15092e-05	1	3	7	731321657	731321657 [917-937]		0	2250.13	182.5			221.7	197.8	19.7	69.4	121.8	92.5	94.7		High	Not Found	Not Found	High	High	Peak Found	Peak Found	High	High	High	High	7.602e-06	3.112e-09	3.78	106.07	Used	Used	R.ALPIGSAESVALPNPGDYHWR.K	[917-937]
	FALSE	High	[K].ALPVYIETPIR.[N]		0.000231167	5.15092e-05	1	3	9	731321657	731321657 [1389-1399]		0	1271.74	147.5	156.7	4.5	169.9		78.4	194.4	100.9	18.4	129.3		High	High	Peak Found	High	Not Found	High	High	High	Peak Found	High	High	7.602e-06	3.672e-06	2.01	40.24	Used	Used	K.ALPVYIETPIR.N	[1389-1399]
	FALSE	High	[K].ALPVYIETPIRNVNR.[A]		0.0507834	0.00117455	1	3	4	731321657	731321657 [1389-1403]		1	1754.99						87.8	67	265.7	179.1	400.3		Not Found	Not Found	Not Found	Not Found	Not Found	Peak Found	Peak Found	High	Peak Found	High	High	0.0001881	0.002273	2.61	34.17	Used	Used	K.ALPVYIETPIRNVNR.A	[1389-1403]
	FALSE	High	[R].APGNPWPQWPR.[V]		3.29911e-05	5.15092e-05	1	3	27	731321657	731321657 [2025-2035]		0	1305.65	240.3	74.2	206.4	65.3	198.3	46.2	41	36.4	30.6	61.3		High	High	High	High	High	High	High	High	Peak Found	High	High	7.602e-06	3.575e-07	2.5	91.31	Used	Used	R.APGNPWPQWPR.V	[2025-2035]
	FALSE	High	[K].ASNYGMMK.[V]		0.00195429	5.15092e-05	1	3	2	731321657	731321657 [846-853]		0	901.391	1.8	517.2	129	231.1		15.4	21.7	59.1	7.1	17.6		Peak Found	High	Peak Found	High	Not Found	Peak Found	Peak Found	Peak Found	Peak Found	Peak Found	High	7.602e-06	4.686e-05	1.84	18	Used	Used	K.ASNYGMMK.V	[846-853]
	FALSE	High	[R].AVGTMLSHEVTK.[R]		0.00024009	5.15092e-05	1	3	1	731321657	731321657 [1404-1415]		0	1272.66						389.3	305		305.7			Not Found	Not Found	Not Found	Not Found	Not Found	Peak Found	High	Not Found	Peak Found	Not Found	High	7.602e-06	3.851e-06	2.61	8.98	Used	Used	R.AVGTMLSHEVTK.R	[1404-1415]
	FALSE	High	[R].AVGTMLSHEVTKR.[Y]		3.9249e-06	5.15092e-05	1	3	7	731321657	731321657 [1404-1416]		1	1428.76	55.5	66.3	5.2	36.7	0.1	326.5	222.3	82.7	103.5	101.3		High	Peak Found	Peak Found	Peak Found	Peak Found	High	High	Peak Found	High	Peak Found	High	7.602e-06	2.762e-08	3.68	8.36	Used	Used	R.AVGTMLSHEVTKR.Y	[1404-1416]
	FALSE	High	[K].AVVEGVGDHGCEYMTGGTVVVLGK.[T]	1xCarbamidomethyl [C11]	4.10972e-05	5.15092e-05	1	3	3	731321657	731321657 [1518-1541]		0	2434.17	21.4	14.1	22.1	20.6	74	155.1	42.5	169.4	186.1	294.7		Peak Found	Peak Found	Peak Found	Peak Found	High	Peak Found	Peak Found	High	High	Peak Found	High	7.602e-06	4.648e-07	2.28	33.58	Used	Used	K.AVVEGVGDHGCEYMTGGTVVVLGK.T	[1518-1541]
	FALSE	High	[R].CNPELVDLDKVEDEEDITTLR.[M]	1xCarbamidomethyl [C1]	2.96021e-09	5.15092e-05	1	3	3	731321657	731321657 [1568-1588]		1	2503.19							342.8	430.8	226.4			Not Found	Not Found	Not Found	Not Found	Not Found	Not Found	Peak Found	High	High	High	High	7.602e-06	4.973e-12	3.57	45.25	Used	Used	R.CNPELVDLDKVEDEEDITTLR.M	[1568-1588]
	FALSE	High	[R].CVQKQDHGLDMALDQELIELSK.[A]	1xCarbamidomethyl [C1]	0.000361408	5.15092e-05	1	3	2	731321657	731321657 [1362-1383]		1	2570.26	49.3	15.8	33.3			30.2	828.6			42.6		Peak Found	Peak Found	Peak Found	Not Found	Not Found	Peak Found	High	Not Found	Not Found	High	High	7.602e-06	6.292e-06	2.97	47.4	Used	Used	R.CVQKQDHGLDMALDQELIELSK.A	[1362-1383]
	FALSE	High	[R].DAIKEGYTVLVLSDR.[A]		0.000672454	5.15092e-05	1	3	4	731321657	731321657 [736-750]		1	1678.9	212.2	261.8	58.5	85.3	7.1	72.7	84.1	8.5	38.8	171.2		High	Peak Found	Peak Found	Peak Found	Peak Found	Peak Found	Peak Found	Peak Found	High	High	High	7.602e-06	1.317e-05	2.42	99.63	Used	Used	R.DAIKEGYTVLVLSDR.A	[736-750]
	FALSE	High	[K].DATEALGSMGNDTPLAVMSNR.[E]		2.58886e-05	5.15092e-05	1	3	3	731321657	731321657 [610-630]		0	2149.99			64.9	473.1	131.9		79.4	193.3	57.3			Not Found	Not Found	Peak Found	High	High	Not Found	Peak Found	Peak Found	Peak Found	Not Found	High	7.602e-06	2.665e-07	2.17	54.63	Used	Used	K.DATEALGSMGNDTPLAVMSNR.E	[610-630]
	FALSE	High	[K].DLGFELPPLGQYAVGMFFLPTSESR.[R]		0.000843903	5.15092e-05	1	1	3	731321657	731321657 [173-197]		0	2771.37	131.3	99.2	103.4	346.2	61.2	162.2	26.8	52.6		17.1		Peak Found	Peak Found	Peak Found	High	Peak Found	High	Peak Found	Peak Found	Not Found	Peak Found	High	7.602e-06	1.73e-05	3.06	108.2	Used	Used	K.DLGFELPPLGQYAVGMFFLPTSESR.R	[173-197]
	FALSE	High	[R].DLSGIHFAMEFLHANTK.[S]		1.14824e-09	5.15092e-05	1	3	16	731321657	731321657 [1951-1967]		0	1930.95	172.3	149.3	80.5	51	107.4	202.8	102.7	54.3	50.3	29.3		High	High	High	High	Peak Found	High	High	High	High	High	High	7.602e-06	1.596e-12	3.85	102.03	Used	Used	R.DLSGIHFAMEFLHANTK.S	[1951-1967]
	FALSE	High	[R].DLSGIHFAMEFLHANTK.[S]	1xOxidation [M9]	1.23071e-07	5.15092e-05	1	3	2	731321657	731321657 [1951-1967]		0	1946.94				78.9	646.4	9.7	248	6.9	10.1			Not Found	Not Found	Not Found	Peak Found	High	Peak Found	High	Peak Found	Peak Found	Not Found	High	7.602e-06	4.359e-10	4.19	112.87	Used	Used	R.DLSGIHFAMEFLHANTK.S	[1951-1967]
	FALSE	High	[K].DIVDSVAQTK.[R]		0.00566361	0.000145442	1	3	1	731321657	731321657 [550-559]		0	1075.56			117.3	116.2	41.7		137.6	191.2	141	255		Not Found	Not Found	High	Peak Found	Peak Found	Not Found	Peak Found	Peak Found	Peak Found	Peak Found	High	2.667e-05	0.0001626	1.48	14.18	Used	Used	K.DIVDSVAQTK.R	[550-559]
	FALSE	High	[R].DVAIAALLGAEEFGFSTAPLITLGCIMMR.[K]	1xCarbamidomethyl [C25]	6.7247e-05	5.15092e-05	1	3	1	731321657	731321657 [1236-1264]		0	3067.57			363.7	251.7		98.9	121.1	164.5				Not Found	Not Found	Peak Found	Peak Found	Not Found	Peak Found	High	Peak Found	Not Found	Not Found	High	7.602e-06	8.343e-07	2.74	109.99	Used	Used	R.DVAIAALLGAEEFGFSTAPLITLGCIMMR.K	[1236-1264]
	FALSE	High	[R].EALDRLLETNNFPEFTGR.[V]		2.32564e-07	5.15092e-05	1	3	4	731321657	731321657 [1776-1793]		1	2122.06						185.4	230.4	228.9	205.6	149.6		Not Found	Not Found	Not Found	Not Found	Not Found	Peak Found	High	High	High	High	High	7.602e-06	9.338e-10	4.07	55.25	Used	Used	R.EALDRLLETNNFPEFTGR.V	[1776-1793]
	FALSE	High	[R].EGIQYRDPYER.[M]		0.0353479	0.000888446	1	3	4	731321657	731321657 [1707-1717]		1	1425.68				71.7		337.8	244.2	52.7	123.5	170.1		Not Found	Not Found	Not Found	High	Not Found	High	High	Peak Found	Peak Found	High	High	0.0001508	0.001402	1.96	9.77	Used	Used	R.EGIQYRDPYER.M	[1707-1717]
	FALSE	High	[R].EKLTFEYFK.[Q]		0.0983446	0.00271996	1	3	1	731321657	731321657 [631-639]		1	1204.62	244	586.6		62.5		92		5.7	9.2			Peak Found	High	Not Found	Peak Found	Not Found	Peak Found	Not Found	Peak Found	Peak Found	Not Found	High	0.0003982	0.006404	1.99	98.31	Used	Used	R.EKLTFEYFK.Q	[631-639]
	FALSE	High	[K].EQANQTEEVEEEFKRPSR.[V]		0.0330978	0.000805946	1	3	2	731321657	731321657 [1674-1691]		1	2206.04	27.9	587.1	27.1	187.4	145.3					25.1		Peak Found	High	Peak Found	Peak Found	High	Not Found	Not Found	Not Found	Not Found	Peak Found	High	0.0001365	0.001288	2.51	87.16	Used	Used	K.EQANQTEEVEEEFKRPSR.V	[1674-1691]
	FALSE	High	[K].EVEGSEEYIEADLVLLAMGFLGPEANVADKLGVEKDNR.[S]		1.06321e-11	5.15092e-05	1	3	1	731321657	731321657 [2094-2131]		2	4120.04	77	282.9	519.3	95.8						25		Peak Found	Peak Found	Peak Found	High	Not Found	Not Found	Not Found	Not Found	Not Found	Peak Found	High	7.602e-06	6.77e-15	6	108.86	Used	Used	K.EVEGSEEYIEADLVLLAMGFLGPEANVADKLGVEKDNR.S	[2094-2131]
	FALSE	High	[K].EVTKDLGFELPPLGQYAVGMFFLPTSESR.[R]		0.00374175	0.000100671	1	1	1	731321657	731321657 [169-197]		1	3228.63		329.4	431.7	162.3				76.6				Not Found	High	Peak Found	Peak Found	Not Found	Not Found	Not Found	Peak Found	Not Found	Not Found	High	1.369e-05	0.0001005	2.67	106.86	Used	Used	K.EVTKDLGFELPPLGQYAVGMFFLPTSESR.R	[169-197]
	FALSE	High	[K].EYYYWDLGNER.[F]		0.00678441	0.000145442	1	1	1	731321657	731321657 [307-317]		0	1507.65					1000							Not Found	Not Found	Not Found	Not Found	High	Not Found	Not Found	Not Found	Not Found	Not Found	High	3.22e-05	0.0002004	1.98	91.65	Used	Used	K.EYYYWDLGNER.F	[307-317]
	FALSE	High	[R].FGVSSYYLTNADELQIK.[M]		6.51284e-08	5.15092e-05	1	3	10	731321657	731321657 [1073-1089]		0	1947.97			14.5	58.4	147.2	68.1	362.1	166.8	77.8	105.1		Not Found	Not Found	Peak Found	Peak Found	High	High	High	High	High	High	High	7.602e-06	2.03e-10	3.92	53.48	Used	Used	R.FGVSSYYLTNADELQIK.M	[1073-1089]
	FALSE	High	[R].FSTNTFPSWDR.[A]		0.000100472	5.15092e-05	1	2	14	731321657	731321657 [329-339]		0	1357.62	190.7	91.2	17.9	289.4	82.1	88.9	66.7	60.5	37.6	75.1		High	High	Peak Found	High	High	Peak Found	Peak Found	Peak Found	Peak Found	High	High	7.602e-06	1.355e-06	2.85	34.61	Used	Used	R.FSTNTFPSWDR.A	[329-339]
	FALSE	High	[R].FTSYMALVHSR.[F]		0.00101969	5.15092e-05	1	1	4	731321657	731321657 [318-328]		0	1311.65	289.1	488.4	10.4	137.5	56.8				17.8			Peak Found	High	Peak Found	High	High	Not Found	Not Found	Not Found	Peak Found	Not Found	High	7.602e-06	2.168e-05	2.39	101.53	Used	Used	R.FTSYMALVHSR.F	[318-328]
	FALSE	High	[R].FYITHSGR.[V]		0.00505866	0.000145442	1	3	6	731321657	731321657 [476-483]		0	980.495	118	170.9	33.9	18.5	642.8	7.8		4	4.1			High	High	High	Peak Found	High	Peak Found	Not Found	Peak Found	Peak Found	Not Found	High	2.019e-05	0.0001424	1.68	105.9	Used	Used	R.FYITHSGR.V	[476-483]
	FALSE	High	[R].GACGCETNTGDGAGILVGLPHDFYK.[E]	2xCarbamidomethyl [C3; C5]	9.10021e-06	5.15092e-05	1	1	3	731321657	731321657 [144-168]		0	2609.18	328.7	307.9		97.9	265.5							High	High	Not Found	Peak Found	High	Not Found	Not Found	Not Found	Not Found	Not Found	High	7.602e-06	7.598e-08	2.43	104.81	Used	Used	R.GACGCETNTGDGAGILVGLPHDFYK.E	[144-168]
	FALSE	High	[R].GFVAYEREGIQYRDPYER.[M]		0.201098	0.00760295	1	3	2	731321657	731321657 [1700-1717]		2	2248.08	2.3	2.4	8	12.8	12.1	441.1	295.7		63.4	162.4		Peak Found	Peak Found	Peak Found	Peak Found	Peak Found	High	High	Not Found	Peak Found	Peak Found	High	0.001148	0.02259	2.02	28.41	Used	Used	R.GFVAYEREGIQYRDPYER.M	[1700-1717]
	FALSE	High	[K].GHADHVLISGHDGGTGASR.[W]		0.0496994	0.00117455	1	3	1	731321657	731321657 [1174-1192]		0	1843.88				1000								Not Found	Not Found	Not Found	High	Not Found	Not Found	Not Found	Not Found	Not Found	Not Found	High	0.0001881	0.002225	1.12	8.5	Used	Used	K.GHADHVLISGHDGGTGASR.W	[1174-1192]
	FALSE	High	[K].GLEETLDRICAEAR.[D]	1xCarbamidomethyl [C10]	3.50524e-05	5.15092e-05	1	3	1	731321657	731321657 [722-735]		1	1632.8							1000					Not Found	Not Found	Not Found	Not Found	Not Found	Not Found	High	Not Found	Not Found	Not Found	High	7.602e-06	3.838e-07	2.2	38.12	Used	Used	K.GLEETLDRICAEAR.D	[722-735]
	FALSE	High	[R].GNVNWMR.[A]		0.0200534	0.000413429	1	3	9	731321657	731321657 [357-363]		0	876.414	2.6	32.9	36.7	108.1	9.5	438.6	148.8	58.3	85.9	78.5		Peak Found	High	High	High	Peak Found	High	High	High	Peak Found	Peak Found	High	7.97e-05	0.0006957	1.23	10.83	Used	Used	R.GNVNWMR.A	[357-363]
	FALSE	High	[K].GPLLSIEEMEAVKK.[M]		4.26839e-05	5.15092e-05	1	3	2	731321657	731321657 [686-699]		1	1543.84	229.2	285.4	149.9	152.2	122.5	7.2		5.2	40.4	8.2		Peak Found	High	Peak Found	High	Peak Found	Peak Found	Not Found	Peak Found	Peak Found	Peak Found	High	7.602e-06	4.853e-07	3.43	108.97	Used	Used	K.GPLLSIEEMEAVKK.M	[686-699]
	FALSE	High	[R].GQSLVVWAISEGR.[Q]		1.47699e-06	5.15092e-05	1	3	11	731321657	731321657 [2157-2169]		0	1401.75	13.2	23.3	33.8	59.7	23.1	79.9	338.9	162.1	126.5	139.5		High	High	High	High	Peak Found	Peak Found	High	High	High	High	High	7.602e-06	8.538e-09	3.6	52.37	Used	Used	R.GQSLVVWAISEGR.Q	[2157-2169]
	FALSE	High	[R].HGCSNVVNLELLPQPPNSR.[A]	1xCarbamidomethyl [C3]	1.74488e-06	5.15092e-05	1	3	2	731321657	731321657 [2006-2024]		0	2131.07	81.4	421	62.1	68.3		130.6			37	199.6		Peak Found	High	Peak Found	Peak Found	Not Found	Peak Found	Not Found	Not Found	Peak Found	High	High	7.602e-06	1.045e-08	3.48	94.04	Used	Used	R.HGCSNVVNLELLPQPPNSR.A	[2006-2024]
	FALSE	High	[R].KGGELHLNDPLAIAK.[L]		1.27972e-05	5.15092e-05	1	3	6	731321657	731321657 [938-952]		1	1575.89	377.2	58.1	67.8	299.4	54.4	6.8	18	12.2	9.2	96.8		Peak Found	Peak Found	High	High	Peak Found	Peak Found	High	Peak Found	Peak Found	High	High	7.602e-06	1.141e-07	4.03	105.13	Used	Used	R.KGGELHLNDPLAIAK.L	[938-952]
	FALSE	High	[K].KLLPIVDASSSDSGAFDGVLELLVR.[A]		0.00923037	0.000239412	1	3	2	731321657	731321657 [383-407]		1	2601.41							530.6		469.4			Not Found	Not Found	High	Not Found	Not Found	Not Found	High	Not Found	Peak Found	Not Found	High	4.984e-05	0.0002829	1.66	95.24	Used	Used	K.KLLPIVDASSSDSGAFDGVLELLVR.A	[383-407]
	FALSE	High	[R].KTVTDAVEMLVR.[M]		0.000260951	5.15092e-05	1	1	5	731321657	731321657 [128-139]		1	1361.75	21.3	140.9	27.4	29.8		146.1	194.1	140.1	66.7	233.6		Peak Found	High	Peak Found	Peak Found	Not Found	Peak Found	High	Peak Found	Peak Found	High	High	7.602e-06	4.267e-06	2.47	36.6	Used	Used	R.KTVTDAVEMLVR.M	[128-139]
	FALSE	High	[K].LAQEVLANLDYLLPK.[F]		5.86085e-07	5.15092e-05	1	3	31	731321657	731321657 [1602-1616]		0	1699.96	177.8	169.1	223.2	82.6	220.7	51.1	30	9.7	12.1	23.7		High	High	High	High	High	High	High	High	High	High	High	7.602e-06	2.82e-09	3.78	110.75	Used	Used	K.LAQEVLANLDYLLPK.F	[1602-1616]
	FALSE	High	[R].IGGLMMYGVPNMK.[T]		0.000647474	5.15092e-05	1	3	5	731321657	731321657 [1876-1888]		0	1410.69				399.6		61.4		46.2		492.8		High	Not Found	Not Found	High	Not Found	Peak Found	Not Found	Peak Found	Not Found	High	High	7.602e-06	1.268e-05	2.3	47.61	Used	Used	R.IGGLMMYGVPNMK.T	[1876-1888]
	FALSE	High	[K].LHEMAFPR.[R]		0.053785	0.0012537	1	3	1	731321657	731321657 [908-915]		0	1000.5			34.3	526.3	10	42.7				386.7		Not Found	Not Found	Peak Found	High	Peak Found	Peak Found	Not Found	Not Found	Not Found	Peak Found	High	0.0001966	0.002477	1.39	15.3	Used	Used	K.LHEMAFPR.R	[908-915]
	FALSE	High	[R].LKEDNDAIVLAVGATKPR.[D]		7.33491e-12	5.15092e-05	1	3	7	731321657	731321657 [1926-1943]		1	1910.07	94.9	252.3	75.5	29.4	322.8	71		5.5	74.7	73.9		Peak Found	High	Peak Found	High	High	Peak Found	Not Found	Peak Found	Peak Found	High	High	7.602e-06	4.506e-15	5.48	109.04	Used	Used	R.LKEDNDAIVLAVGATKPR.D	[1926-1943]
	FALSE	High	[R].LLETNNFPEFTGR.[V]		7.58283e-07	5.15092e-05	1	3	17	731321657	731321657 [1781-1793]		0	1537.76	78.7	87.5	99.6	149.5	112.9	113.2	98.6	106	70.1	83.9		High	High	High	High	High	Peak Found	High	High	Peak Found	High	High	7.602e-06	3.862e-09	1.99	38.85	Used	Used	R.LLETNNFPEFTGR.V	[1781-1793]
	FALSE	High	[K].LLPIVDASSSDSGAFDGVLELLVR.[A]		3.43846e-12	5.15092e-05	1	3	25	731321657	731321657 [384-407]		0	2473.32	147.2	169.2	75.6	67.5	115.6	314.7	5	53	9.6	42.6		High	High	High	High	High	High	Peak Found	High	High	High	High	7.602e-06	1.93e-15	3.3	104.21	Used	Used	K.LLPIVDASSSDSGAFDGVLELLVR.A	[384-407]
	FALSE	High	[R].LNPGMMLLVDFDKHIVVDDDALKK.[Q]		2.62381e-08	5.15092e-05	1	3	8	731321657	731321657 [506-529]		2	2726.43	216.9	171.8	330.9	227.3	31.2	10.2	5.4	2	0.4	3.9		High	High	High	High	Peak Found	Peak Found	Peak Found	Peak Found	Peak Found	Peak Found	High	7.602e-06	6.788e-11	5.31	108.33	Used	Used	R.LNPGMMLLVDFDKHIVVDDDALKK.Q	[506-529]
	FALSE	High	[R].LPDGSMNPK.[R]		0.000910259	5.15092e-05	1	3	1	731321657	731321657 [1053-1061]		0	958.466	37.7		458.7	503.5								High	Not Found	Peak Found	Peak Found	Not Found	Not Found	Not Found	Not Found	Not Found	Not Found	High	7.602e-06	1.901e-05	1.9	9.87	Used	Used	R.LPDGSMNPK.R	[1053-1061]
	FALSE	High	[K].IPEFNELVYQNR.[W]		1.23143e-06	5.15092e-05	1	3	4	731321657	731321657 [1762-1773]		0	1521.77	176.1	110.6	152.4	68.3	150.1	58.8	92.2	55.3	119.8	16.4		High	High	High	Peak Found	High	Peak Found	Peak Found	Peak Found	Peak Found	Peak Found	High	7.602e-06	6.86e-09	2.25	92.2	Used	Used	K.IPEFNELVYQNR.W	[1762-1773]
	FALSE	High	[K].IPLEEVQPASEIVKR.[F]		2.70926e-05	5.15092e-05	1	3	3	731321657	731321657 [994-1008]		1	1707.96	660.3			241.9					16.9	80.9		High	Not Found	Not Found	High	Not Found	Not Found	Not Found	Not Found	Peak Found	High	High	7.602e-06	2.815e-07	3.37	93.23	Used	Used	K.IPLEEVQPASEIVKR.F	[994-1008]
	FALSE	High	[R].LSLKGPLLSIEEMEAVKK.[M]		0.00944034	0.000239412	1	3	2	731321657	731321657 [682-699]		2	1985.14						64.7	683		50.9	201.4		Not Found	Not Found	Not Found	Not Found	Not Found	Peak Found	High	Not Found	Peak Found	High	High	4.984e-05	0.0002908	2.07	44.02	Used	Used	R.LSLKGPLLSIEEMEAVKK.M	[682-699]
	FALSE	High	[K].LTFEYFK.[Q]		0.00923037	0.000239412	1	3	11	731321657	731321657 [633-639]		0	947.487	177.3	22.1	55.5	178.2	265.7	104	46.5	27.1	41.2	82.3		High	Peak Found	High	High	High	Peak Found	High	High	High	High	High	4.984e-05	0.0002836	1.16	95.26	Used	Used	K.LTFEYFK.Q	[633-639]
	FALSE	High	[K].IVLKDIVDSVAQTK.[R]		6.71323e-08	5.15092e-05	1	3	7	731321657	731321657 [546-559]		1	1528.89	161.9	149		110.9	406.2	116.3	1.6	11.2	31	11.7		High	High	Not Found	High	High	Peak Found	Peak Found	Peak Found	Peak Found	Peak Found	High	7.602e-06	2.098e-10	4.22	108.54	Used	Used	K.IVLKDIVDSVAQTK.R	[546-559]
	FALSE	High	[K].IVLKDIVDSVAQTKR.[I]		3.74828e-07	5.15092e-05	1	3	8	731321657	731321657 [546-560]		2	1685	166.9	81.9	74.9	166	121.6	15	109.5	140.7	59.3	64		Peak Found	Peak Found	Peak Found	High	Peak Found	Peak Found	High	High	High	High	High	7.602e-06	1.652e-09	3.2	108.4	Used	Used	K.IVLKDIVDSVAQTKR.I	[546-560]
	FALSE	High	[K].LVSEAGVGVIAAGVVK.[G]		8.05664e-07	5.15092e-05	1	3	6	731321657	731321657 [1158-1173]		0	1468.87	3.5			254.9	52.2	317.8	54.1	81.5	75.3	160.8		Peak Found	Not Found	Not Found	High	High	High	Peak Found	Peak Found	High	High	High	7.602e-06	4.126e-09	2.87	35.76	Used	Used	K.LVSEAGVGVIAAGVVK.G	[1158-1173]
	FALSE	High	[K].IVTSMECMIGPEGDLTEITEEQCHR.[L]	2xCarbamidomethyl [C7; C23]	1.44126e-09	5.15092e-05	1	3	5	731321657	731321657 [657-681]		0	2935.29	160.7	46.8				41.7	172.2	210.6	193.5	174.5		High	Peak Found	Not Found	Not Found	Not Found	Peak Found	High	High	High	High	High	7.602e-06	2.1e-12	4.61	50.3	Used	Used	K.IVTSMECMIGPEGDLTEITEEQCHR.L	[657-681]
	FALSE	High	[K].IVVYPPSTSGFDPK.[E]		0.0252197	0.000547401	1	3	7	731321657	731321657 [1468-1481]		0	1506.78		18.1	108.6	267.1	121.7	5.4	154.4	71.9	230.1	22.7		Not Found	High	High	High	High	Peak Found	Peak Found	Peak Found	Peak Found	Peak Found	High	0.0001012	0.0009171	1.03	74.08	Used	Used	K.IVVYPPSTSGFDPK.E	[1468-1481]
	FALSE	High	[K].MAASALKEQANQTEEVEEEFKRPSR.[V]		5.68923e-06	5.15092e-05	1	3	1	731321657	731321657 [1667-1691]		2	2878.4	203.6	470.9	229.4	54.3				18.5	23.3			Peak Found	High	Peak Found	Peak Found	Not Found	Not Found	Not Found	Peak Found	Peak Found	Not Found	High	7.602e-06	4.303e-08	3.91	98.87	Used	Used	K.MAASALKEQANQTEEVEEEFKRPSR.V	[1667-1691]
	FALSE	High	[K].MAQGAKPGEGGELPGHK.[V]		0.000153561	5.15092e-05	1	3	5	731321657	731321657 [1090-1106]		0	1663.82	279.4		331.1	358.4				31.2				High	Not Found	High	High	Not Found	Not Found	Not Found	Peak Found	Not Found	Not Found	High	7.602e-06	2.252e-06	1.76	91.53	Used	Used	K.MAQGAKPGEGGELPGHK.V	[1090-1106]
	FALSE	High	[K].MAQGAKPGEGGELPGHKVIGDIALTR.[N]		0.00023648	5.15092e-05	1	3	2	731321657	731321657 [1090-1115]		1	2602.38				27.5	14.2	46.3	395.1	367.4	89.7	59.9		Not Found	Not Found	Not Found	Peak Found	Peak Found	Peak Found	High	Peak Found	Peak Found	High	High	7.602e-06	3.772e-06	2.64	27.85	Used	Used	K.MAQGAKPGEGGELPGHKVIGDIALTR.N	[1090-1115]
	FALSE	High	[K].MGHVVTVYER.[S]		0.000258982	5.15092e-05	1	3	13	731321657	731321657 [1863-1872]		0	1190.6	56	56.3	24.8	43.4	0.4	424.9	153.5	55.9	90.9	93.9		High	High	Peak Found	High	Peak Found	High	High	High	High	High	High	7.602e-06	4.228e-06	2.34	8.67	Used	Used	K.MGHVVTVYER.S	[1863-1872]
	FALSE	High	[K].MGISTLASYK.[G]		0.000582355	5.15092e-05	1	3	4	731321657	731321657 [858-867]		0	1070.56	282.7			395	142.9		87.2	5.1	74.4	12.7		High	Not Found	Not Found	High	High	Not Found	Peak Found	Peak Found	Peak Found	Peak Found	High	7.602e-06	1.111e-05	1.87	25.33	Used	Used	K.MGISTLASYK.G	[858-867]
	FALSE	High	[K].MGIYGLLAPLK.[A]		5.08087e-05	5.15092e-05	1	3	8	731321657	731321657 [581-591]		0	1175.69	299.1	316.3	25	190.9	156.7	2.9			3.4	5.8		High	High	Peak Found	High	High	Peak Found	Not Found	Not Found	Peak Found	Peak Found	High	7.602e-06	5.988e-07	2.55	111.88	Used	Used	K.MGIYGLLAPLK.A	[581-591]
	FALSE	High	[R].MKDWKEVMDER.[R]		0.00183959	5.15092e-05	1	3	1	731321657	731321657 [1718-1728]		2	1466.68					1000							Not Found	Not Found	Not Found	Not Found	High	Not Found	Not Found	Not Found	Not Found	Not Found	High	7.602e-06	4.39e-05	2.02	109.18	Used	Used	R.MKDWKEVMDER.R	[1718-1728]
	FALSE	High	[R].MMIQQHQR.[H]		0.0647368	0.0014591	1	3	1	731321657	731321657 [1589-1596]		0	1071.52	406.4			593.6								High	Not Found	Not Found	Peak Found	Not Found	Not Found	Not Found	Not Found	Not Found	Not Found	High	0.0002252	0.003279	1.1	89.74	Used	Used	R.MMIQQHQR.H	[1589-1596]
	FALSE	High	[K].NAGLPWELGLAETHQTLVANDLR.[G]		3.31064e-12	5.15092e-05	1	3	14	731321657	731321657 [1198-1220]		0	2518.3	183.9	209.2	40.4	96.8	177.3	126.4	77.1	19.5	26	43.4		High	High	High	High	High	High	Peak Found	High	High	High	High	7.602e-06	1.849e-15	5.23	111.63	Used	Used	K.NAGLPWELGLAETHQTLVANDLR.G	[1198-1220]
	FALSE	High	[K].NAGLPWELGLAETHQTLVANDLRGR.[T]		1.23934e-08	5.15092e-05	1	3	4	731321657	731321657 [1198-1222]		1	2731.43						113.6	348.2	153.8	191.8	192.7		Not Found	Not Found	Not Found	Not Found	Not Found	Peak Found	High	High	High	High	High	7.602e-06	2.775e-11	4	56.92	Used	Used	K.NAGLPWELGLAETHQTLVANDLRGR.T	[1198-1222]
	FALSE	High	[R].NLDEMVGR.[S]		0.00139058	5.15092e-05	1	3	5	731321657	731321657 [1315-1322]		0	933.446	69.6	1.2	219.1	357.2	7.1	87	2.7	163	93.2			High	Peak Found	High	High	Peak Found	Peak Found	Peak Found	Peak Found	Peak Found	Not Found	High	7.602e-06	3.141e-05	1.11	14.38	Used	Used	R.NLDEMVGR.S	[1315-1322]
	FALSE	High	[K].NIDLSLLLRPASTIRPGAAQR.[C]		0.000981826	5.15092e-05	1	3	12	731321657	731321657 [1341-1361]		0	2262.3	256.1	352.9	2.6	61.2	184.7	59.8	15.5	34.6	8.7	23.9		High	High	Peak Found	High	High	High	Peak Found	Peak Found	Peak Found	High	High	7.602e-06	2.084e-05	3.68	112.44	Used	Used	K.NIDLSLLLRPASTIRPGAAQR.C	[1341-1361]
	FALSE	High	[R].NSTAGVGLISPPPHHDIYSIEDLAQLIHDLK.[N]		1.44126e-09	5.15092e-05	1	3	11	731321657	731321657 [1116-1146]		0	3350.74	415.4	84.4	223	118.8	17.2	24.7	67.8	13.7	26.5	8.5		High	High	High	High	Peak Found	Peak Found	Peak Found	Peak Found	Peak Found	Peak Found	High	7.602e-06	2.086e-12	5.44	106.82	Used	Used	R.NSTAGVGLISPPPHHDIYSIEDLAQLIHDLK.N	[1116-1146]
	FALSE	High	[K].NTCPVGIATQDPVLR.[A]	1xCarbamidomethyl [C3]	0.00181198	5.15092e-05	1	3	7	731321657	731321657 [1269-1283]		0	1640.84	20.1		95.5	131.5	8.3	95.8	184.7	240.6	48.8	174.8		High	Not Found	High	High	High	Peak Found	High	Peak Found	High	High	High	7.602e-06	4.291e-05	0.99	27.52	Used	Used	K.NTCPVGIATQDPVLR.A	[1269-1283]
	FALSE	High	[R].QAASQVDRYLMGEEEVAVGSEVEDAVGKR.[Q]		3.68542e-10	5.15092e-05	1	3	3	731321657	731321657 [2170-2198]		2	3122.51				32.2		72.7	381.6	144.6	238.4	130.5		Not Found	Not Found	Not Found	Peak Found	Not Found	Peak Found	High	High	Peak Found	High	High	7.602e-06	4.055e-13	5.26	56.33	Used	Used	R.QAASQVDRYLMGEEEVAVGSEVEDAVGKR.Q	[2170-2198]
	FALSE	High	[K].QDHGLDMALDQELIELSK.[A]		3.71999e-07	5.15092e-05	1	3	4	731321657	731321657 [1366-1383]		0	2055.01	172.2	290.3	60.1	22.9	434.2		6.9	3.1	10.2			High	Peak Found	Peak Found	Peak Found	High	Not Found	Peak Found	Peak Found	Peak Found	Not Found	High	7.602e-06	1.635e-09	4.88	107.22	Used	Used	K.QDHGLDMALDQELIELSK.A	[1366-1383]
	FALSE	High	[K].QMFAQVTNPPIDPIREK.[I]		0.00415847	0.000100671	1	3	2	731321657	731321657 [640-656]		1	1984.03	327.1	402.1	24.9	104.6		59.4	8.6	43.5	17.3	12.5		Peak Found	High	Peak Found	High	Not Found	Peak Found	Peak Found	Peak Found	Peak Found	Peak Found	High	1.369e-05	0.000114	2.12	96.32	Used	Used	K.QMFAQVTNPPIDPIREK.I	[640-656]
	FALSE	High	[K].QYSLARPYGDWLKR.[Q]		0.00431823	0.000100671	1	3	9	731321657	731321657 [530-543]		1	1752.92	160	205.4	346.3	89	25.4	95.2			53.8	24.9		High	High	High	High	Peak Found	Peak Found	Not Found	Not Found	High	Peak Found	High	1.369e-05	0.0001191	2.24	93.93	Used	Used	K.QYSLARPYGDWLKR.Q	[530-543]
	FALSE	High	[R].RALPIGSAESVALPNPGDYHWR.[K]		1.3756e-11	5.15092e-05	1	3	13	731321657	731321657 [916-937]		1	2406.23	140.8	135.5	10.6	107.3	73.9	77.2	122.5	115.6	64.3	152.5		High	High	Peak Found	High	Peak Found	High	High	High	High	High	High	7.602e-06	9.053e-15	5.79	108.69	Used	Used	R.RALPIGSAESVALPNPGDYHWR.K	[916-937]
	FALSE	High	[R].RGQSLVVWAISEGR.[Q]		2.3447e-06	5.15092e-05	1	3	4	731321657	731321657 [2156-2169]		1	1557.85			11.3			326.9	246.5	115	98.6	201.7		Not Found	Not Found	Peak Found	Not Found	Not Found	High	High	Peak Found	High	High	High	7.602e-06	1.492e-08	2.78	44.43	Used	Used	R.RGQSLVVWAISEGR.Q	[2156-2169]
	FALSE	High	[K].SALLTEPVVEQVFLTPTPR.[S]		6.22341e-08	5.15092e-05	1	1	18	731321657	731321657 [232-250]		0	2097.16		42.2	96	61.5	55.5	139.6	228.8	160.7	63.1	152.5		High	High	Peak Found	High	High	High	High	High	High	High	High	7.602e-06	1.914e-10	2.1	65.57	Used	Used	K.SALLTEPVVEQVFLTPTPR.S	[232-250]
	FALSE	High	[K].SALLTEPVVEQVFLTPTPR.[S]	1xPhospho [E6]; 2xGG [T5; T15]	0.049343	0.00117455	1	1	1	731321657	731321657 [232-250]	731321657 1xPhospho [E237]	0	2405.21				133.7			304.2	362.3	199.7			Not Found	Not Found	Not Found	Peak Found	Not Found	Not Found	Peak Found	High	Peak Found	Not Found	High	0.0001841	0.002182	1.52	15.98	Used	Used	K.SALLTEPVVEQVFLTPTPR.S	[232-250]
	FALSE	High	[R].SDMLEVDEEVTSSNEK.[L]		7.41243e-07	5.15092e-05	1	3	1	731321657	731321657 [1323-1338]		0	1811.79			207.1	436.5	42.3		87.1	105	54.3	67.7		Not Found	Not Found	Peak Found	High	Peak Found	Not Found	Peak Found	Peak Found	Peak Found	Peak Found	High	7.602e-06	3.755e-09	1.42	25.49	Used	Used	R.SDMLEVDEEVTSSNEK.L	[1323-1338]
	FALSE	High	[R].SKVIDITYPK.[T]		0.154537	0.0050504	1	3	2	731321657	731321657 [707-716]		1	1163.67				167.1			421.3	249.9	161.6			Not Found	Not Found	Not Found	Peak Found	Not Found	Not Found	Peak Found	High	High	Not Found	High	0.0007504	0.01395	1.62	16.67	Used	Used	R.SKVIDITYPK.T	[707-716]
	FALSE	High	[K].SLLDSNLQDGK.[Y]		0.000443404	5.15092e-05	1	3	4	731321657	731321657 [1968-1978]		0	1189.61	65.1	14.2	359.9	118	174.6	64.7	93	22.4	63.1	25.1		High	Peak Found	High	High	Peak Found	Peak Found	Peak Found	Peak Found	Peak Found	Peak Found	High	7.602e-06	8.016e-06	1.86	16.86	Used	Used	K.SLLDSNLQDGK.Y	[1968-1978]
	FALSE	High	[K].SLLDSNLQDGKYISAK.[G]		8.42638e-08	5.15092e-05	1	3	9	731321657	731321657 [1968-1983]		1	1751.92		18.9	2	24.7	6.7	142.9	185.5	250.2	92.7	276.4		Not Found	Peak Found	Peak Found	Peak Found	Peak Found	Peak Found	High	High	High	High	High	7.602e-06	2.752e-10	2.53	27.79	Used	Used	K.SLLDSNLQDGKYISAK.G	[1968-1983]
	FALSE	High	[K].SIPEAVMMLIPEAWQNDK.[N]		0.000837539	5.15092e-05	1	3	2	731321657	731321657 [411-428]		0	2072.02	258.4			327.8	82.9	108.3		23.7	177.9	21.1		High	Not Found	Not Found	High	Peak Found	Peak Found	Not Found	Peak Found	Peak Found	Peak Found	High	7.602e-06	1.718e-05	2.48	98.64	Used	Used	K.SIPEAVMMLIPEAWQNDK.N	[411-428]
	FALSE	High	[K].SIPEAVMMLIPEAWQNDKNMDPQRR.[A]		0.012086	0.000286933	1	3	3	731321657	731321657 [411-435]		2	2969.44	221.8	512.6	124.3	22.4		83	16.9	4.7	8.9	5.5		High	High	High	Peak Found	Not Found	Peak Found	Peak Found	Peak Found	Peak Found	Peak Found	High	6.08e-05	0.0003864	3.25	104.41	Used	Used	K.SIPEAVMMLIPEAWQNDKNMDPQRR.A	[411-435]
	FALSE	High	[K].SNTGEGGENPSRLER.[L]		0.0106426	0.000239412	1	3	6	731321657	731321657 [1038-1052]		1	1602.75		115.1	451.1	406.8		15		7.1		4.8		High	High	High	High	Not Found	Peak Found	Not Found	Peak Found	Not Found	Peak Found	High	5.511e-05	0.0003328	2.28	8.02	Used	Used	K.SNTGEGGENPSRLER.L	[1038-1052]
	FALSE	High	[R].SYEVLTK.[R]		0.0319081	0.000805946	1	3	2	731321657	731321657 [2056-2062]		0	839.451	205.6	44.3	383.9	119.4		86.3	135.7	24.7				Peak Found	Peak Found	High	Peak Found	Not Found	Peak Found	Peak Found	Peak Found	Not Found	High	High	0.0001365	0.001228	2.01	12.18	Used	Used	R.SYEVLTK.R	[2056-2062]
	FALSE	High	[K].TDKVDVVQR.[R]		0.00114226	5.15092e-05	1	3	4	731321657	731321657 [1889-1897]		1	1059.58	125.2	28.5	161.3	132.1	22.3	151.1	100.9	118.7	73.7	86.1		High	Peak Found	High	Peak Found	Peak Found	Peak Found	Peak Found	Peak Found	Peak Found	Peak Found	High	7.602e-06	2.484e-05	2.35	9.84	Used	Used	K.TDKVDVVQR.R	[1889-1897]
	FALSE	High	[K].TIECAIIDK.[A]	1xCarbamidomethyl [C4]	0.0479415	0.00113645	1	3	2	731321657	731321657 [1816-1824]		0	1062.55			425	575								Not Found	Not Found	High	High	Not Found	Not Found	Not Found	Not Found	Not Found	Not Found	High	0.0001841	0.002107	1.3	16.34	Used	Used	K.TIECAIIDK.A	[1816-1824]
	FALSE	High	[K].TIECAIIDKAYEEGWMVPRPPQNR.[T]	1xCarbamidomethyl [C4]	3.95243e-07	5.15092e-05	1	3	15	731321657	731321657 [1816-1839]		1	2873.41	194.3	78.1	69	82.6	160.3	209.4	128.9	13.2	20.2	44		High	High	High	High	High	High	High	Peak Found	Peak Found	High	High	7.602e-06	1.768e-09	3.89	112.7	Used	Used	K.TIECAIIDKAYEEGWMVPRPPQNR.T	[1816-1839]
	FALSE	High	[K].TLELVR.[V]		0.118059	0.00351463	1	3	13	731321657	731321657 [2074-2079]		0	730.446	7	8	92.8	60.4		269.2	213.8	121.3	102.3	125.2		Peak Found	Peak Found	High	High	Not Found	Peak Found	High	High	High	High	High	0.0004975	0.008702	1.27	10.68	Used	Used	K.TLELVR.V	[2074-2079]
	FALSE	High	[K].TNSVGAYKEYSNR.[I]		3.89528e-06	5.15092e-05	1	3	5	731321657	731321657 [959-971]		1	1488.71	174.9		39.7	160.1		82.8	235.2	73.8	119.7	113.9		High	Not Found	Peak Found	Peak Found	Not Found	Peak Found	High	High	Peak Found	High	High	7.602e-06	2.741e-08	2.37	10.74	Used	Used	K.TNSVGAYKEYSNR.I	[959-971]
	FALSE	High	[R].TVLQTDGQLK.[T]		0.000600262	5.15092e-05	1	3	15	731321657	731321657 [1223-1232]		0	1102.61	168.8	6	280.4	163.4	38.6	28.2	99.3	83.6	84.5	47.2		High	High	High	High	High	High	High	High	High	High	High	7.602e-06	1.157e-05	1.75	12.89	Used	Used	R.TVLQTDGQLK.T	[1223-1232]
	FALSE	High	[R].TVLQTDGQLKTGR.[D]		3.27236e-06	5.15092e-05	1	3	9	731321657	731321657 [1223-1235]		1	1416.78				4		83.9	387.2	251.5	131.8	141.5		Not Found	Not Found	Not Found	Peak Found	Not Found	High	High	High	Peak Found	High	High	7.602e-06	2.215e-08	1.98	12.38	Used	Used	R.TVLQTDGQLKTGR.D	[1223-1235]
	FALSE	High	[R].TVPTDNSGLGK.[S]		9.67378e-05	5.15092e-05	1	1	15	731321657	731321657 [221-231]		0	1088.56	108.4	95.4	195.9	73.6	153	78.8	139.9	56.4	50	48.6		High	High	High	High	High	High	High	High	Peak Found	High	High	7.602e-06	1.291e-06	2.33	10.43	Used	Used	R.TVPTDNSGLGK.S	[221-231]
	FALSE	High	[K].TVTDAVEMLVR.[M]		5.08087e-05	5.15092e-05	1	1	5	731321657	731321657 [129-139]		0	1233.65	46.3	160.1	57.2	145.6	4.5	86.1	175.5	145	118.9	60.8		High	High	Peak Found	High	Peak Found	Peak Found	Peak Found	Peak Found	High	High	High	7.602e-06	5.979e-07	1.91	43.91	Used	Used	K.TVTDAVEMLVR.M	[129-139]
	FALSE	High	[K].VAESLGHTVLGWR.[T]		1.92435e-07	5.15092e-05	1	1	21	731321657	731321657 [208-220]		0	1424.76	141.9	266.4	33.6	109.5	98	56.3	105.1	78.3	49.4	61.6		High	High	High	High	Peak Found	Peak Found	High	High	High	High	High	7.602e-06	7.453e-10	3.48	105.6	Used	Used	K.VAESLGHTVLGWR.T	[208-220]
	FALSE	High	[R].VAVSSLLAVGAVHQHLVK.[T]		2.82866e-09	5.15092e-05	1	3	5	731321657	731321657 [757-774]		0	1828.08	423.8	238.5	39	222.5	42.4	5.9		11.2	4.6	12		High	High	High	High	Peak Found	Peak Found	Not Found	Peak Found	Peak Found	High	High	7.602e-06	4.675e-12	3.89	110.71	Used	Used	R.VAVSSLLAVGAVHQHLVK.T	[757-774]
	FALSE	High	[K].VAVVGSGPSGLAAADQLNK.[M]		7.35648e-07	5.15092e-05	1	3	6	731321657	731321657 [1844-1862]		0	1753.94		38.3	95.7	301.3		126.5	201.4		203.1	33.8		High	Peak Found	Peak Found	High	Not Found	High	High	Not Found	High	High	High	7.602e-06	3.716e-09	2.61	25.37	Used	Used	K.VAVVGSGPSGLAAADQLNK.M	[1844-1862]
	FALSE	High	[R].VCPAPCEGSCVLGIIENPVSIK.[T]	3xCarbamidomethyl [C2; C6; C10]	2.0446e-07	5.15092e-05	1	3	5	731321657	731321657 [1794-1815]		0	2399.18			3.4	46.3	442.7	196.6	19.9	107.9	140.3	42.9		High	Not Found	Peak Found	Peak Found	High	Peak Found	Peak Found	High	High	Peak Found	High	7.602e-06	7.963e-10	4.35	98.91	Used	Used	R.VCPAPCEGSCVLGIIENPVSIK.T	[1794-1815]
	FALSE	High	[R].VEGATFEMLASDALK.[L]		4.7378e-08	5.15092e-05	1	3	7	731321657	731321657 [893-907]		0	1581.78	161.3	192.9	25.5	185.2	239.1	125.3	11.3	20.7	11.9	26.6		High	High	High	High	Peak Found	Peak Found	Peak Found	Peak Found	Peak Found	Peak Found	High	7.602e-06	1.38e-10	3.43	105.23	Used	Used	R.VEGATFEMLASDALK.L	[893-907]
	FALSE	High	[R].VEGATFEMLASDALK.[L]	1xOxidation [M8]	0.000687902	5.15092e-05	1	3	1	731321657	731321657 [893-907]		0	1597.78	37.8	296.4	403.3	25.1	149	24.6	19.2	14.4	13.2	17.1		Peak Found	Peak Found	Peak Found	Peak Found	High	Peak Found	Peak Found	Peak Found	Peak Found	Peak Found	High	7.602e-06	1.356e-05	1.62	99.28	Used	Used	R.VEGATFEMLASDALK.L	[893-907]
	FALSE	High	[R].VFRVDYGHQEAAAK.[F]		1.08262e-06	5.15092e-05	1	3	8	731321657	731321657 [2036-2049]		1	1590.8		9				388.8	272	87.5	145.6	97.2		Not Found	Peak Found	Not Found	Not Found	Not Found	High	High	High	High	High	High	7.602e-06	5.908e-09	3.59	12.49	Used	Used	R.VFRVDYGHQEAAAK.F	[2036-2049]
	FALSE	High	[R].VGLIIESAEPR.[E]		4.43317e-05	5.15092e-05	1	3	12	731321657	731321657 [781-791]		0	1183.67	94.5	44.7	100.1	270.7	33.9	78.6	110.1	76.5	91.9	99.1		High	High	High	High	High	High	High	Peak Found	High	High	High	7.602e-06	5.067e-07	2.38	25.72	Used	Used	R.VGLIIESAEPR.E	[781-791]
	FALSE	High	[K].VIDITYPK.[T]		0.00909297	0.000194547	1	3	5	731321657	731321657 [709-716]		0	948.54	104.4	83.6	265.8	436.1	71.1	5.7	11	15.2	7.1			High	High	High	High	High	Peak Found	Peak Found	Peak Found	Peak Found	Not Found	High	4.426e-05	0.000278	1.8	19.86	Used	Used	K.VIDITYPK.T	[709-716]
	FALSE	High	[K].VIGDIALTR.[N]		0.000243755	5.15092e-05	1	3	11	731321657	731321657 [1107-1115]		0	957.573	87.5	41.6	119.3	35.4	37.3	116.6	234.6	72.8	89.3	165.6		High	High	High	Peak Found	High	High	High	Peak Found	High	High	High	7.602e-06	3.926e-06	1.99	24.75	Used	Used	K.VIGDIALTR.N	[1107-1115]
	FALSE	High	[R].VLGHNGEINTLR.[G]		8.18871e-05	5.15092e-05	1	3	6	731321657	731321657 [345-356]		0	1322.72	103.7	85.6	13.9	94.5		288.3	84.7	129.6	67.2	132.4		High	High	Peak Found	High	Not Found	High	High	Peak Found	Peak Found	High	High	7.602e-06	1.064e-06	3.51	8.91	Used	Used	R.VLGHNGEINTLR.G	[345-356]
	FALSE	High	[R].VIMASEVGVVDIPPEDVSK.[K]		0.00131886	5.15092e-05	1	3	1	731321657	731321657 [484-502]		0	1984.03					91.4			343.1	523	42.5		Not Found	Not Found	Not Found	Not Found	High	Not Found	Not Found	Peak Found	Peak Found	Peak Found	High	7.602e-06	2.953e-05	1.09	81.6	Used	Used	R.VIMASEVGVVDIPPEDVSK.K	[484-502]
	FALSE	High	[K].VVVIGGGDTGTDCIGTSIR.[H]	1xCarbamidomethyl [C13]	1.8356e-10	5.15092e-05	1	3	10	731321657	731321657 [1987-2005]		0	1876.94	11.3	2.1	61.9	129.2	17	93	158.7	271.2	101.7	154		High	Peak Found	Peak Found	High	High	High	High	High	Peak Found	High	High	7.602e-06	1.76e-13	2.96	29.24	Used	Used	K.VVVIGGGDTGTDCIGTSIR.H	[1987-2005]
	FALSE	High	[R].WREALDRLLETNNFPEFTGR.[V]		0.0155764	0.000377453	1	3	5	731321657	731321657 [1774-1793]		2	2464.24	5.8		16.7	9.6	93.2	374.6	235.1	7.8	79.6	177.6		Peak Found	Not Found	Peak Found	Peak Found	Peak Found	High	High	Peak Found	Peak Found	High	High	7.112e-05	0.0005165	2.49	67.48	Used	Used	R.WREALDRLLETNNFPEFTGR.V	[1774-1793]
	FALSE	High	[R].WTGIKNAGLPWELGLAETHQTLVANDLRGR.[T]		1.34785e-07	5.15092e-05	1	3	1	731321657	731321657 [1193-1222]		2	3316.75							1000					Not Found	Not Found	Not Found	Not Found	Not Found	Not Found	High	Not Found	Not Found	Not Found	High	7.602e-06	4.825e-10	6.16	55.18	Used	Used	R.WTGIKNAGLPWELGLAETHQTLVANDLRGR.T	[1193-1222]
	FALSE	High	[R].YHLQGLPTDSIHIK.[F]		0.000856776	5.15092e-05	1	3	6	731321657	731321657 [1417-1430]		0	1621.87	21.9	10	151.6	379.5	146.5	8.3	40	13.1	22.7	206.5		Peak Found	Peak Found	High	High	Peak Found	Peak Found	High	Peak Found	High	High	High	7.602e-06	1.761e-05	2.41	105.58	Used	Used	R.YHLQGLPTDSIHIK.F	[1417-1430]
	FALSE	High	[R].YLGATLDR.[N]		0.00537284	0.000145442	1	3	5	731321657	731321657 [461-468]		0	908.484	176.8	122.4	308.3	65.6	127.3	29.4	21.9	5.4	31	111.9		High	High	High	Peak Found	High	Peak Found	Peak Found	Peak Found	Peak Found	High	High	2.019e-05	0.000153	1.98	18.05	Used	Used	R.YLGATLDR.N	[461-468]
	FALSE	High	[R].YLMGEEEVAVGSEVEDAVGKR.[Q]		3.49096e-12	5.15092e-05	1	3	8	731321657	731321657 [2178-2198]		1	2267.09	171.7	188.4	17.3	174.8	380.7		1.7	25.9	32.2	7.3		High	High	Peak Found	High	High	Not Found	Peak Found	Peak Found	High	Peak Found	High	7.602e-06	1.962e-15	3.81	105.64	Used	Used	R.YLMGEEEVAVGSEVEDAVGKR.Q	[2178-2198]
	FALSE	High	[R].YSTNVEGVFAAGDCR.[R]	1xCarbamidomethyl [C14]	1.75815e-06	5.15092e-05	1	3	5	731321657	731321657 [2141-2155]		0	1645.73	26.9	9	68.8	229.8	78.1	103.1	121	162.8	50.9	149.6		High	Peak Found	Peak Found	High	High	Peak Found	High	Peak Found	Peak Found	High	High	7.602e-06	1.059e-08	2.23	28.34	Used	Used	R.YSTNVEGVFAAGDCR.R	[2141-2155]
	FALSE	High	[R].YSTNVEGVFAAGDCRR.[G]	1xCarbamidomethyl [C14]	2.39997e-05	5.15092e-05	1	3	8	731321657	731321657 [2141-2156]		1	1801.83	134.1	152.3	11.7	48.7	10.1	100.5	167.4	161.9	11.1	202.2		High	High	Peak Found	Peak Found	Peak Found	High	High	High	Peak Found	High	High	7.602e-06	2.437e-07	2.46	24.2	Used	Used	R.YSTNVEGVFAAGDCRR.G	[2141-2156]
FALSE		High	Master Protein	8157161373445240598	3423	731313356	PREDICTED: alcohol dehydrogenase 3 [Beta vulgaris subsp. vulgaris]	MTSTAGQVIRCKAAVAWEAGKPLVMEEVEVAPPQKMEVRVKILFTSLCHTDVYFWEAKGQTPVFPRILGHEAGGIVESVGEGVTDLQPGDHVLPVFTGECKECAHCKSEESNMCDLLRINTDRGVMLNDGKSRFSINGKPIFHFVGTSTFSEYTVVHVGCLAKINPEAPLDKVCILSCGISTGFGATVNVARPKKGQTVAIFGLGAVGLAAAEGARVSGASKIIGVDLVSSRFEAAKKFGVTDFVNPKDHNKPVQEVIAEMTNGGVDRSVECTGNIQAMISAFECVHDGWGVAVLVGVPNKDDAFKTHPVNFLNERTLKGTFFGNYKPRTDIPGVVEKYMNKELELDKFITHEVAFKDINKAFDLMLKGESIRCIIRMDA	>gi|731313356|ref|XP_010679876.1| PREDICTED: alcohol dehydrogenase 3 [Beta vulgaris subsp. vulgaris]	0	909.199	92	48	2806	31	31	380	41.2	6.68	5414.17	92	2806	48	21	119.6	108.3	120	140.7	131.4	79.3	79	70.4	73.6	77.8	2.43234e+09	1.81125e+09	1.43996e+09	2.17477e+09	3.51921e+09	7.14221e+08	1.57873e+09	1.54268e+09	1.88792e+09	3.41439e+09	5.25015e+09	4.75311e+09	5.26946e+09	6.17928e+09	5.77025e+09
	Checked	Confidence	Annotated Sequence	Modifications	Qvality PEP	Qvality q-value	# Protein Groups	# Proteins	# PSMs	Master Protein Accessions	Positions in Master Proteins	Modifications in Master Proteins	# Missed Cleavages	Theo. MH+ [Da]	Abundances (Scaled): F1: Control	Abundances (Scaled): F2: Control	Abundances (Scaled): F3: Control	Abundances (Scaled): F4: Control	Abundances (Scaled): F5: Control	Abundances (Scaled): F6: Sample	Abundances (Scaled): F7: Sample	Abundances (Scaled): F8: Sample	Abundances (Scaled): F9: Sample	Abundances (Scaled): F10: Sample	Quan Info	Found in Sample: [S1] F1: Control	Found in Sample: [S2] F2: Control	Found in Sample: [S3] F3: Control	Found in Sample: [S4] F4: Control	Found in Sample: [S5] F5: Control	Found in Sample: [S6] F6: Sample	Found in Sample: [S7] F7: Sample	Found in Sample: [S8] F8: Sample	Found in Sample: [S9] F9: Sample	Found in Sample: [S10] F10: Sample	Confidence (by Search Engine): Sequest HT	Percolator q-Value (by Search Engine): Sequest HT	Percolator PEP (by Search Engine): Sequest HT	XCorr (by Search Engine): Sequest HT	Top Apex RT [min]	Quan Usage	Quan Ratio Usage	Sequence in Protein	Positions in Proteins
	FALSE	High	[K].AAVAWEAGKPLVMEEVEVAPPQK.[M]		1.7136e-11	5.15092e-05	1	1	39	731313356	731313356 [13-35]		0	2449.28	162.9	259.2	37.1	135	247	32.3	28	26.3	29.4	42.7		High	High	High	High	High	High	High	High	High	High	High	7.602e-06	1.157e-14	6.52	96.8	Used	Used	K.AAVAWEAGKPLVMEEVEVAPPQK.M	[13-35]
	FALSE	High	[K].AAVAWEAGKPLVMEEVEVAPPQK.[M]	1xOxidation [M13]	0.0166555	0.000413429	1	1	3	731313356	731313356 [13-35]		0	2465.27	277.2	154.1	87.9	78.8		160.9	31.3	60.3	149.5			High	High	Peak Found	High	Not Found	Peak Found	Peak Found	Peak Found	Peak Found	Not Found	High	7.552e-05	0.0005591	1.63	94.03	Used	Used	K.AAVAWEAGKPLVMEEVEVAPPQK.M	[13-35]
	FALSE	High	[K].AAVAWEAGKPLVMEEVEVAPPQKMEVR.[V]		3.50925e-16	5.15092e-05	1	1	29	731313356	731313356 [13-39]		1	2964.53	34.5	125.7	3.4	40.4		70.4	135.8	219.6	84.9	285.4		High	High	Peak Found	High	Not Found	High	High	High	High	High	High	7.602e-06	6.83e-20	6.66	43.95	Used	Used	K.AAVAWEAGKPLVMEEVEVAPPQKMEVR.V	[13-39]
	FALSE	High	[K].AFDLMLK.[G]		0.00300621	0.000100671	1	1	31	731313356	731313356 [362-368]		0	837.454	193.8	160.5	77.4	270.6	189.5	23.6	9.8	12.7	28	34.1		High	High	High	High	High	High	High	High	High	High	High	1.369e-05	7.82e-05	2.29	42.78	Used	Used	K.AFDLMLK.G	[362-368]
	FALSE	High	[K].AFDLMLK.[G]	1xOxidation [M5]	0.0197582	0.000413429	1	1	10	731313356	731313356 [362-368]		0	853.449	125.2	143	122	503.5	6.7	37.8	8.6	3.4	35.6	14.2		High	High	High	High	Peak Found	Peak Found	Peak Found	Peak Found	High	Peak Found	High	7.97e-05	0.0006823	1.51	27.42	Used	Used	K.AFDLMLK.G	[362-368]
	FALSE	High	[K].AFDLMLKGESIR.[C]		5.39222e-07	5.15092e-05	1	1	96	731313356	731313356 [362-373]		1	1379.74	159.3	246.9	50.6	130.7	124.4	73.3	65.9	24	27.7	97		High	High	High	High	High	High	High	High	High	High	High	7.602e-06	2.555e-09	3.23	35.2	Used	Used	K.AFDLMLKGESIR.C	[362-373]
	FALSE	High	[K].AFDLMLKGESIR.[C]	1xOxidation [M5]	1.23215e-05	5.15092e-05	1	1	7	731313356	731313356 [362-373]		1	1395.73	128.3	196.2	2	176.2	426.7	47.4	2.3	1.1	0.9	18.9		High	High	Peak Found	High	High	High	Peak Found	Peak Found	Peak Found	High	High	7.602e-06	1.093e-07	2.2	107.04	Used	Used	K.AFDLMLKGESIR.C	[362-373]
	FALSE	High	[R].CKAAVAWEAGKPLVMEEVEVAPPQKMEVR.[V]	1xCarbamidomethyl [C1]	3.47276e-08	5.15092e-05	1	1	3	731313356	731313356 [11-39]		2	3252.66		3.7	34.4	31.4	8.8	162.2	369	147.4	95.3	147.8		Not Found	Peak Found	Peak Found	Peak Found	Peak Found	High	High	Peak Found	High	Peak Found	High	7.602e-06	9.481e-11	6.47	36.15	Used	Used	R.CKAAVAWEAGKPLVMEEVEVAPPQKMEVR.V	[11-39]
	FALSE	High	[R].CIIRMDA.[-]	1xCarbamidomethyl [C1]	0.144861	0.00457845	2	2	7	731313358; 731313356	731313358 [380-386]; 731313356 [374-380]		1	878.422			1	6.5		103.6	263.5	300.7	109.3	215.5	Shared	Not Found	Not Found	Peak Found	Peak Found	Not Found	High	High	Peak Found	High	High	High	0.000674	0.01246	1.28	19.91	Used	Used	R.CIIRMDA.-	[374-380]
	FALSE	High	[K].DHNKPVQEVIAEMTNGGVDR.[S]		7.49913e-13	5.15092e-05	1	1	106	731313356	731313356 [249-268]		0	2209.07	143.1	127.1	218.5	192.2	185.3	33.5	21.3	19.1	21	38.9		High	High	High	High	High	High	High	High	High	High	High	7.602e-06	3.543e-16	5.7	109.5	Used	Used	K.DHNKPVQEVIAEMTNGGVDR.S	[249-268]
	FALSE	High	[K].DHNKPVQEVIAEMTNGGVDR.[S]	1xOxidation [M13]	0.00266406	0.000100671	1	1	9	731313356	731313356 [249-268]		0	2225.06	24.9	265.6	132.3	91	64.8	341.7	33.1	19.5	23.3	3.8		Peak Found	High	High	High	High	High	Peak Found	Peak Found	High	Peak Found	High	1.369e-05	6.759e-05	2.34	102.37	Used	Used	K.DHNKPVQEVIAEMTNGGVDR.S	[249-268]
	FALSE	High	[K].DINKAFDLMLK.[G]		1.25096e-05	5.15092e-05	1	1	9	731313356	731313356 [358-368]		1	1307.7	90.1	3.3	6.9	282.1	256.2	55.7	10.6	83.5	82.7	128.8		High	Peak Found	Peak Found	High	Peak Found	Peak Found	High	High	High	High	High	7.602e-06	1.116e-07	2.83	106.69	Used	Used	K.DINKAFDLMLK.G	[358-368]
	FALSE	High	[K].DINKAFDLMLKGESIR.[C]		5.8471e-11	5.15092e-05	1	1	24	731313356	731313356 [358-373]		2	1849.98	98.7	178.1	125.9	88.7	150.9	120.2	45.9	52.7	49.1	89.8		High	High	High	High	High	High	High	Peak Found	High	High	High	7.602e-06	4.539e-14	6.05	50.01	Used	Used	K.DINKAFDLMLKGESIR.C	[358-373]
	FALSE	High	[K].ECAHCKSEESNMCDLLR.[I]	3xCarbamidomethyl [C2; C5; C13]	8.03774e-11	5.15092e-05	2	2	34	731313358; 731313356	731313358 [108-124]; 731313356 [102-118]		1	2138.87	28	37.6	35.5	129.5	218.5	150.5	87.6	76.3	107.8	128.8	Shared	High	High	High	High	High	High	High	High	High	High	High	7.602e-06	6.545e-14	5.57	10.23	Used	Used	K.ECAHCKSEESNMCDLLR.I	[102-118]
	FALSE	High	[K].ELELDKFITHEVAFK.[D]		8.74143e-10	5.15092e-05	1	1	107	731313356	731313356 [343-357]		1	1818.96	276.7	230.3	207.1	151.3	42.8	56.3	7.3	4	15.9	8.3		High	High	High	High	High	High	High	High	High	High	High	7.602e-06	1.152e-12	6.16	112.56	Used	Used	K.ELELDKFITHEVAFK.D	[343-357]
	FALSE	High	[K].ELELDKFITHEVAFKDINK.[A]		9.79923e-09	5.15092e-05	1	1	21	731313356	731313356 [343-361]		2	2289.21	360.7	274.5	82.5	109.6	16.4	8.3	47.8	19.5	24	56.6		High	High	High	High	High	High	Peak Found	High	High	High	High	7.602e-06	2.095e-11	5.94	105.37	Used	Used	K.ELELDKFITHEVAFKDINK.A	[343-361]
	FALSE	High	[K].FGVTDFVNPK.[D]		2.51015e-06	5.15092e-05	2	3	81	731313358; 731313356	731313358 [245-254]; 731313356 [239-248]		0	1123.58	89.9	75.9	126.6	222.3	121.4	124.7	30	56.9	77.7	74.6	Shared	High	High	High	High	High	High	High	High	High	High	High	7.602e-06	1.618e-08	2.05	35.66	Used	Used	K.FGVTDFVNPK.D	[239-248]
	FALSE	High	[K].FGVTDFVNPKDHNKPVQEVIAEMTNGGVDR.[S]		2.34604e-05	5.15092e-05	1	1	14	731313356	731313356 [239-268]		1	3313.63	10	20.2	73.3	16.3		145	156.5	194	133.5	251.3		Peak Found	Peak Found	High	Peak Found	Not Found	High	High	High	High	High	High	7.602e-06	2.358e-07	4.45	60.93	Used	Used	K.FGVTDFVNPKDHNKPVQEVIAEMTNGGVDR.S	[239-268]
	FALSE	High	[K].FGVTDFVNPKDHNKPVQEVIAEMTNGGVDR.[S]	1xOxidation [M23]	0.02395	0.000504161	1	1	3	731313356	731313356 [239-268]		1	3329.62						718.5				281.5		Not Found	Not Found	Not Found	Not Found	Not Found	High	Not Found	Not Found	Not Found	High	High	9.626e-05	0.0008566	2.67	66.29	Used	Used	K.FGVTDFVNPKDHNKPVQEVIAEMTNGGVDR.S	[239-268]
	FALSE	High	[K].FITHEVAFK.[D]		0.000794316	5.15092e-05	1	1	11	731313356	731313356 [349-357]		0	1091.59	203.1	186.5	96.1	158.9	280.4	30	16.9	1.7	15.7	10.9		High	High	High	High	High	Peak Found	Peak Found	Peak Found	Peak Found	High	High	7.602e-06	1.606e-05	1.82	107.86	Used	Used	K.FITHEVAFK.D	[349-357]
	FALSE	High	[K].GQTPVFPR.[I]		0.0042536	0.000100671	2	2	148	731313358; 731313356	731313358 [65-72]; 731313356 [59-66]		0	901.489	84.5	53	230.3	169.5	70.3	77.2	83.7	71.4	108.5	51.6	Shared	High	High	High	High	High	High	High	High	High	High	High	1.369e-05	0.0001168	1.91	13.8	Used	Used	K.GQTPVFPR.I	[59-66]
	FALSE	High	[K].GQTVAIFGLGAVGLAAAEGAR.[V]		8.29966e-08	5.15092e-05	1	1	1	731313356	731313356 [196-216]		0	1929.06											No Quan Values	Not Found	Not Found	High	Not Found	Not Found	Not Found	Not Found	Not Found	Not Found	Not Found	High	7.602e-06	2.712e-10	2.76		Not Used	Not Used	K.GQTVAIFGLGAVGLAAAEGAR.V	[196-216]
	FALSE	High	[K].GTFFGNYKPR.[T]		9.16942e-06	5.15092e-05	2	2	525	731313358; 731313356	731313358 [326-335]; 731313356 [320-329]		0	1186.6	82.1	121.5	84.9	188.8	276.9	71.3	47.7	37.1	48.4	41.2	Shared	High	High	High	High	High	High	High	High	High	High	High	7.602e-06	7.656e-08	1.48	108.09	Used	Used	K.GTFFGNYKPR.T	[320-329]
	FALSE	High	[K].GTFFGNYKPRTDIPGVVEK.[Y]		0.0215951	0.000413429	1	1	1	731313356	731313356 [320-338]		1	2125.11							310	442.8	224.6	22.6		Not Found	Not Found	Not Found	Not Found	Not Found	Not Found	Peak Found	High	Peak Found	Peak Found	High	7.97e-05	0.0007555	2.31	30.23	Used	Used	K.GTFFGNYKPRTDIPGVVEK.Y	[320-338]
	FALSE	High	[R].GVMLNDGK.[S]		0.0057064	0.000145442	2	3	18	731313358; 731313356	731313358 [130-137]; 731313356 [124-131]		0	833.419	334.3	55.6	203.4	118.1	113	98.9	21.6	29.1	13.9	12.2	Shared	High	High	Peak Found	High	High	Peak Found	Peak Found	Peak Found	Peak Found	Peak Found	High	2.667e-05	0.000163	1.74	8.84	Used	Used	R.GVMLNDGK.S	[124-131]
	FALSE	High	[R].GVMLNDGKSR.[F]	1xGG [K8]	9.10492e-05	5.15092e-05	2	3	3	731313358; 731313356	731313358 [130-139]; 731313356 [124-133]		1	1190.59	64.6		621.4	217.7	30.3	42.3			12.5	11.3	Shared	Peak Found	Not Found	High	High	Peak Found	Peak Found	Not Found	Not Found	Peak Found	Peak Found	High	7.602e-06	1.208e-06	2.52	10.37	Used	Used	R.GVMLNDGKSR.F	[124-133]
	FALSE	High	[K].KFGVTDFVNPK.[D]		7.52118e-08	5.15092e-05	2	3	77	731313358; 731313356	731313358 [244-254]; 731313356 [238-248]		1	1251.67	163.1	239.5	25.9	187.6	199	37.5	23.6	17.2	43.2	63.5	Shared	High	High	High	High	High	High	High	High	High	High	High	7.602e-06	2.397e-10	3.71	107.29	Used	Used	K.KFGVTDFVNPK.D	[238-248]
	FALSE	High	[K].KFGVTDFVNPK.[D]	1xGG [K1]	0.0016548	5.15092e-05	2	3	2	731313358; 731313356	731313358 [244-254]; 731313356 [238-248]		1	1365.72							132.4	96.3	482.6	288.6	Shared	Not Found	Not Found	Not Found	Not Found	Not Found	Not Found	Peak Found	Peak Found	High	High	High	7.602e-06	3.865e-05	2.51	17.59	Used	Used	K.KFGVTDFVNPK.D	[238-248]
	FALSE	High	[K].KFGVTDFVNPKDHNKPVQEVIAEMTNGGVDR.[S]		1.65475e-06	5.15092e-05	1	1	8	731313356	731313356 [238-268]		2	3441.72		146.9	281.7	155.8		5.6	143.6	119.5	104.1	42.9		Not Found	Peak Found	High	Peak Found	Not Found	Peak Found	High	High	High	High	High	7.602e-06	9.841e-09	3.35	106.1	Used	Used	K.KFGVTDFVNPKDHNKPVQEVIAEMTNGGVDR.S	[238-268]
	FALSE	High	[K].KFGVTDFVNPKDHNKPVQEVIAEMTNGGVDR.[S]	1xOxidation [M24]	0.000924142	5.15092e-05	1	1	1	731313356	731313356 [238-268]		2	3457.72											No Quan Values	Not Found	Not Found	Not Found	Not Found	Not Found	High	Not Found	Not Found	Not Found	Not Found	High	7.602e-06	1.936e-05	2.54		Not Used	Not Used	K.KFGVTDFVNPKDHNKPVQEVIAEMTNGGVDR.S	[238-268]
	FALSE	High	[K].KGQTVAIFGLGAVGLAAAEGAR.[V]		1.24365e-15	5.15092e-05	1	1	117	731313356	731313356 [195-216]		1	2057.15	161.6	144.2	96.3	212.5	97.2	98.1	46.9	40.9	54.3	48.1		High	High	High	High	High	High	High	High	High	High	High	7.602e-06	2.812e-19	6.94	110.91	Used	Used	K.KGQTVAIFGLGAVGLAAAEGAR.V	[195-216]
	FALSE	High	[K].KGQTVAIFGLGAVGLAAAEGAR.[V]	1xGG [K/T]	4.16281e-09	5.15092e-05	1	1	4	731313356	731313356 [195-216]		1	2171.19								227.9	772.1			Not Found	Not Found	Not Found	Not Found	Not Found	Not Found	Not Found	High	High	Not Found	High	7.602e-06	7.465e-12	4.4	53.79	Used	Used	K.KGQTVAIFGLGAVGLAAAEGAR.V	[195-216]
	FALSE	High	[K].ILFTSLCHTDVYFWEAK.[G]	1xCarbamidomethyl [C7]	1.52952e-11	5.15092e-05	1	1	24	731313356	731313356 [42-58]		0	2130.04	416.5	92.2	23.1	79.8	0.9	216.9	99.8	13.8	22.7	34.2		High	High	High	High	Peak Found	High	High	High	High	High	High	7.602e-06	1.015e-14	3.55	113.04	Used	Used	K.ILFTSLCHTDVYFWEAK.G	[42-58]
	FALSE	High	[K].ILFTSLCHTDVYFWEAKGQTPVFPR.[I]	1xCarbamidomethyl [C7]	0.212373	0.00833692	1	1	1	731313356	731313356 [42-66]		1	3012.51					295.2		704.8					Not Found	Not Found	Not Found	Not Found	Peak Found	Not Found	High	Not Found	Not Found	Not Found	High	0.001267	0.02505	1.07	63.34	Used	Used	K.ILFTSLCHTDVYFWEAKGQTPVFPR.I	[42-66]
	FALSE	High	[R].ILGHEAGGIVESVGEGVTDLQPGDHVLPVFTGECK.[E]	1xCarbamidomethyl [C34]	2.04448e-20	5.15092e-05	1	1	56	731313356	731313356 [67-101]		0	3616.8	209.8	172.4	94.3	101.4	246.1	72.8	20.9	12.7	17.3	52.2		High	High	High	High	High	Peak Found	High	High	High	High	High	7.602e-06	1.304e-24	9.23	111.59	Used	Used	R.ILGHEAGGIVESVGEGVTDLQPGDHVLPVFTGECK.E	[67-101]
	FALSE	High	[R].ILGHEAGGIVESVGEGVTDLQPGDHVLPVFTGECKECAHCK.[S]	3xCarbamidomethyl [C34; C37; C40]	5.3421e-10	5.15092e-05	1	1	7	731313356	731313356 [67-107]		1	4402.09	207.6			36.4		211.7	128	93.6	13.5	309.2		High	Not Found	Not Found	High	Not Found	Peak Found	High	High	Peak Found	High	High	7.602e-06	6.359e-13	8.06	99.77	Used	Used	R.ILGHEAGGIVESVGEGVTDLQPGDHVLPVFTGECKECAHCK.S	[67-107]
	FALSE	High	[RK].IIGVDLVSSR.[F]		2.17487e-05	5.15092e-05	2	2	114	731313358; 731313356	731313358 [229-238]; 731313356 [223-232]		0	1058.62	106.7	41.3	128.7	218	86	41.7	64.3	97.8	86.7	129	Shared	High	High	High	High	High	High	High	High	High	High	High	7.602e-06	2.166e-07	2.38	29.07	Used	Used	K.IIGVDLVSSR.F	[223-232]
	FALSE	High	[RK].IIGVDLVSSRFEAAK.[K]		2.98097e-10	5.15092e-05	2	2	45	731313358; 731313356	731313358 [229-243]; 731313356 [223-237]		1	1604.9	15.5	21		19		44.2	219.4	333.9	118	229	Shared	High	High	Not Found	Peak Found	Not Found	High	High	High	High	High	High	7.602e-06	3.15e-13	3.1	37.4	Used	Used	K.IIGVDLVSSRFEAAK.K	[223-237]
	FALSE	High	[RK].IIGVDLVSSRFEAAKK.[F]		2.22359e-06	5.15092e-05	2	2	63	731313358; 731313356	731313358 [229-244]; 731313356 [223-238]		2	1733	15.1	19.9	24.6	24.7	47.2	137.5	121.2	202.4	210.7	196.7	Shared	Peak Found	Peak Found	Peak Found	High	Peak Found	High	High	High	High	High	High	7.602e-06	1.401e-08	2.96	34.54	Used	Used	K.IIGVDLVSSRFEAAKK.F	[223-238]
	FALSE	High	[K].INPEAPLDK.[V]		0.00148854	5.15092e-05	2	2	15	731313358; 731313356	731313358 [170-178]; 731313356 [164-172]		0	996.536	139.3	29.9	401.3	258.1	128.2	1.8	16.6	9.7	13.2	1.9	Shared	High	High	High	High	High	Peak Found	Peak Found	Peak Found	Peak Found	Peak Found	High	7.602e-06	3.416e-05	1.98	12.11	Used	Used	K.INPEAPLDK.V	[164-172]
	FALSE	High	[K].INPEAPLDKVCILSCGISTGFGATVNVARPK.[K]	2xCarbamidomethyl [C11; C15]	1.31138e-15	5.15092e-05	1	1	18	731313356	731313356 [164-194]		1	3284.71	202	157.3	73.2	120.2	391.2	27.5	1.5	10.1	2.9	14.1		High	High	High	High	High	High	Peak Found	High	High	High	High	7.602e-06	2.975e-19	7.28	110.46	Used	Used	K.INPEAPLDKVCILSCGISTGFGATVNVARPK.K	[164-194]
	FALSE	High	[R].INTDRGVMLNDGK.[S]		1.44211e-08	5.15092e-05	2	2	22	731313358; 731313356	731313358 [125-137]; 731313356 [119-131]		1	1432.72	0.5	1.2	3.7	5.7	0.2	249.1	200	179.3	191.2	169.2	Shared	Peak Found	Peak Found	Peak Found	High	Peak Found	High	High	High	High	High	High	7.602e-06	3.329e-11	3.43	8.6	Used	Used	R.INTDRGVMLNDGK.S	[119-131]
	FALSE	High	[R].INTDRGVMLNDGK.[S]	1xOxidation [M8]	0.000903395	5.15092e-05	2	2	1	731313358; 731313356	731313358 [125-137]; 731313356 [119-131]		1	1448.72	36.1		62.6						275.9	625.4	Shared	Peak Found	Not Found	Peak Found	Not Found	Not Found	Not Found	Not Found	Not Found	Peak Found	High	High	7.602e-06	1.888e-05	2.81	11.14	Used	Used	R.INTDRGVMLNDGK.S	[119-131]
	FALSE	High	[R].INTDRGVMLNDGKSR.[F]		1.17326e-11	5.15092e-05	2	2	28	731313358; 731313356	731313358 [125-139]; 731313356 [119-133]		2	1675.85	97.5	1.8	330.8	112.8	0.4	124.7	109.2	117.3	62	43.4	Shared	Peak Found	Peak Found	Peak Found	Peak Found	Peak Found	High	High	High	High	High	High	7.602e-06	7.594e-15	5.33	10.68	Used	Used	R.INTDRGVMLNDGKSR.F	[119-133]
	FALSE	High	[R].INTDRGVMLNDGKSR.[F]	1xGG [K13]	0.00462134	0.000100671	2	2	1	731313358; 731313356	731313358 [125-139]; 731313356 [119-133]		2	1789.9								593		407	Shared	Not Found	Not Found	Not Found	Not Found	Not Found	Not Found	Not Found	Peak Found	Not Found	High	High	1.369e-05	0.000128	2.3	10.63	Used	Used	R.INTDRGVMLNDGKSR.F	[119-133]
	FALSE	High	[-].MTSTAGQVIR.[C]	1xMet-loss+Acetyl [N-Term]	0.000180039	5.15092e-05	1	1	55	731313356	731313356 [1-10]	731313356 1xMet-loss+Acetyl [N-Term]	0	974.527	45.1	12.7	192.5	82.3	87.4	42.4	120.6	166.6	110.6	139.8		High	High	High	High	High	High	High	High	High	High	High	7.602e-06	2.735e-06	1.99	15.51	Used	Used	-.MTSTAGQVIR.C	[1-10]
	FALSE	High	[-].MTSTAGQVIRCK.[A]	1xCarbamidomethyl [C11]; 1xMet-loss+Acetyl [N-Term]	4.36408e-06	5.15092e-05	1	1	1	731313356	731313356 [1-12]	731313356 1xMet-loss+Acetyl [N-Term]	1	1262.65	161.4		35.5							803.1		Peak Found	Not Found	Peak Found	Not Found	Not Found	Not Found	Not Found	Not Found	Not Found	High	High	7.602e-06	3.131e-08	2.8	13.03	Used	Used	-.MTSTAGQVIRCK.A	[1-12]
	FALSE	High	[K].SEESNMCDLLR.[I]	1xCarbamidomethyl [C7]	1.32836e-06	5.15092e-05	2	2	54	731313358; 731313356	731313358 [114-124]; 731313356 [108-118]		0	1353.58	31.9	39.4	249.6	377.4	73.1	40.3	34.9	39.5	42	72	Shared	High	High	High	High	High	High	High	High	High	High	High	7.602e-06	7.512e-09	1.81	26.68	Used	Used	K.SEESNMCDLLR.I	[108-118]
	FALSE	High	[K].SEESNMCDLLR.[I]	1xCarbamidomethyl [C7]; 1xOxidation [M6]	1.65571e-05	5.15092e-05	2	2	14	731313358; 731313356	731313358 [114-124]; 731313356 [108-118]		0	1369.57	6.2	30.3	328.2	345.2	115.8	163.8	3		5.2	2.2	Shared	High	Peak Found	High	High	High	High	Peak Found	Not Found	Peak Found	Peak Found	High	7.602e-06	1.559e-07	2.09	11.43	Used	Used	K.SEESNMCDLLR.I	[108-118]
	FALSE	High	[R].SVECTGNIQAMISAFECVHDGWGVAVLVGVPNKDDAFK.[T]	2xCarbamidomethyl [C4; C17]	2.0398e-11	5.15092e-05	2	2	9	731313358; 731313356	731313358 [275-312]; 731313356 [269-306]		1	4120.96	120.4		28.3	411.9	260.3		15.8			163.3	Shared	High	High	Peak Found	High	High	High	Peak Found	Not Found	Not Found	High	High	7.602e-06	1.407e-14	5.56	105.4	Used	Used	R.SVECTGNIQAMISAFECVHDGWGVAVLVGVPNKDDAFK.T	[269-306]
	FALSE	High	[R].TDIPGVVEK.[Y]		0.000277251	5.15092e-05	1	1	137	731313356	731313356 [330-338]		0	957.525	85.4	46.9	211.8	81	71	48.6	114.6	98	144.4	98.3		High	High	High	High	High	High	High	High	High	High	High	7.602e-06	4.574e-06	1.62	13.99	Used	Used	R.TDIPGVVEK.Y	[330-338]
	FALSE	High	[R].TDIPGVVEKYMNK.[E]		9.38021e-06	5.15092e-05	1	1	9	731313356	731313356 [330-342]		1	1493.77	5.7	1.8	1.5	204.2	1.4	56.1	115.9	148.4	192.6	272.4		Peak Found	Peak Found	Peak Found	Peak Found	Peak Found	Peak Found	High	High	High	High	High	7.602e-06	7.898e-08	3.45	37.64	Used	Used	R.TDIPGVVEKYMNK.E	[330-342]
	FALSE	High	[K].THPVNFLNER.[T]		0.000876454	5.15092e-05	1	1	205	731313356	731313356 [307-316]		0	1226.63	117.4	124.8	158.8	114.1	178.7	63.9	55.6	28.3	105	53.4		High	High	High	High	High	High	High	High	High	High	High	7.602e-06	1.817e-05	2.12	105.86	Used	Used	K.THPVNFLNER.T	[307-316]
	FALSE	High	[KR].TLKGTFFGNYKPR.[T]		8.03774e-11	5.15092e-05	2	2	273	731313358; 731313356	731313358 [323-335]; 731313356 [317-329]		1	1528.83	10.5	13.9	8	10.9	6.6	151	280.6	184.1	174.5	160	Shared	High	High	High	High	High	High	High	High	High	High	High	7.602e-06	6.526e-14	3	11.78	Used	Used	R.TLKGTFFGNYKPR.T	[317-329]
	FALSE	High	[R].TLKGTFFGNYKPRTDIPGVVEK.[Y]		0.000140218	5.15092e-05	1	1	6	731313356	731313356 [317-338]		2	2467.33	5.1	2.1		16.6	53.4	72.7	406.1	8.1	54.8	381.1		Peak Found	Peak Found	Not Found	Peak Found	Peak Found	High	High	Peak Found	High	High	High	7.602e-06	2.013e-06	4.11	34.88	Used	Used	R.TLKGTFFGNYKPRTDIPGVVEK.Y	[317-338]
	FALSE	High	[K].VCILSCGISTGFGATVNVARPK.[K]	2xCarbamidomethyl [C2; C6]	1.22782e-11	5.15092e-05	1	1	1	731313356	731313356 [173-194]		0	2307.19		65.7	49.5	21.2	799.3	25.1	18.6	8.2	9	3.2		Not Found	Peak Found	Peak Found	Peak Found	High	Peak Found	Peak Found	Peak Found	Peak Found	Peak Found	High	7.602e-06	7.979e-15	6.15	105.63	Used	Used	K.VCILSCGISTGFGATVNVARPK.K	[173-194]
	FALSE	High	[R].VSGASKIIGVDLVSSRFEAAK.[K]		2.22099e-08	5.15092e-05	1	1	3	731313356	731313356 [217-237]		2	2134.19	4.7		49.7		22.3		428.5	258.4		236.4		Peak Found	Not Found	Peak Found	Not Found	Peak Found	Not Found	High	High	Not Found	High	High	7.602e-06	5.56e-11	5.14	33.38	Used	Used	R.VSGASKIIGVDLVSSRFEAAK.K	[217-237]
	FALSE	High	[K].YMNKELELDK.[F]		0.00629288	0.000145442	1	1	1	731313356	731313356 [339-348]		1	1282.63				1000								Not Found	Not Found	Not Found	High	Not Found	Not Found	Not Found	Not Found	Not Found	Not Found	High	3.22e-05	0.0001827	1.24	11.54	Used	Used	K.YMNKELELDK.F	[339-348]
	FALSE	High	[K].YMNKELELDKFITHEVAFK.[D]		4.11928e-14	5.15092e-05	1	1	78	731313356	731313356 [339-357]		2	2355.21	290.8	193.6	272.6	128.4	10.9	68	9.5	9.6	8.8	7.7		High	High	High	High	High	High	High	High	High	High	High	7.602e-06	1.393e-17	5.35	104.39	Used	Used	K.YMNKELELDKFITHEVAFK.D	[339-357]
	FALSE	High	[K].YMNKELELDKFITHEVAFK.[D]	1xOxidation [M2]	1.51887e-10	5.15092e-05	1	1	16	731313356	731313356 [339-357]		2	2371.2	251.8	294.3	139.8	254.9	4.7	46.9			4.8	2.9		High	High	High	High	High	High	Not Found	Not Found	Peak Found	Peak Found	High	7.602e-06	1.409e-13	6.86	101.63	Used	Used	K.YMNKELELDKFITHEVAFK.D	[339-357]
FALSE		High	Master Protein	-3207304166640741708	1190	731354634	PREDICTED: glutamine synthetase nodule isozyme [Beta vulgaris subsp. vulgaris]	MALLNDLINLNLSETSDKIIAEYIWIGGSGLDMRSKARTLTGPISDPAKLPKWNYDGSSTNQAPGEDSEVILYPQAIFKDPFRRGDNILVMCDAYTPAGEPIPTNKRYNAEKIFSHPDVVAEEPWYGIEQEYTLLQKDINWPLGWPTGGFPGPQGPYYCGVGADKSFGRDIVDAHYKACIYAGVNISGINGEVMPGQWEFQVGPTVGISSGDQVWVARYILERIAEIAGVVVSFDPKPVKGDWNGAGAHTNYSTKSMREDGGINVIKAAIEKLGLRHKEHIAAYGEGNERRLTGRHETADITTFSWGVANRGASVRVGRDTEKDGKGYFEDRRPASNMDPYVVTSMIAETTILGKP	>gi|731354634|ref|XP_010688706.1| PREDICTED: glutamine synthetase nodule isozyme [Beta vulgaris subsp. vulgaris]	0	867.092	85	40	2751	40	40	356	39	5.48	6283.32	85	2751	40	0	86.2	74.2	80.4	107.6	113.4	126.9	87.1	110.2	103	111.1	1.99137e+09	1.41017e+09	1.0962e+09	1.88893e+09	3.44991e+09	1.29803e+09	1.97884e+09	2.74386e+09	3.00181e+09	5.54272e+09	4.29832e+09	3.70058e+09	4.01147e+09	5.36712e+09	5.65662e+09
	Checked	Confidence	Annotated Sequence	Modifications	Qvality PEP	Qvality q-value	# Protein Groups	# Proteins	# PSMs	Master Protein Accessions	Positions in Master Proteins	Modifications in Master Proteins	# Missed Cleavages	Theo. MH+ [Da]	Abundances (Scaled): F1: Control	Abundances (Scaled): F2: Control	Abundances (Scaled): F3: Control	Abundances (Scaled): F4: Control	Abundances (Scaled): F5: Control	Abundances (Scaled): F6: Sample	Abundances (Scaled): F7: Sample	Abundances (Scaled): F8: Sample	Abundances (Scaled): F9: Sample	Abundances (Scaled): F10: Sample	Quan Info	Found in Sample: [S1] F1: Control	Found in Sample: [S2] F2: Control	Found in Sample: [S3] F3: Control	Found in Sample: [S4] F4: Control	Found in Sample: [S5] F5: Control	Found in Sample: [S6] F6: Sample	Found in Sample: [S7] F7: Sample	Found in Sample: [S8] F8: Sample	Found in Sample: [S9] F9: Sample	Found in Sample: [S10] F10: Sample	Confidence (by Search Engine): Sequest HT	Percolator q-Value (by Search Engine): Sequest HT	Percolator PEP (by Search Engine): Sequest HT	XCorr (by Search Engine): Sequest HT	Top Apex RT [min]	Quan Usage	Quan Ratio Usage	Sequence in Protein	Positions in Proteins
	FALSE	High	[K].ARTLTGPISDPAKLPK.[W]		3.05309e-08	5.15092e-05	1	1	24	731354634	731354634 [37-52]		2	1664.97						173.9	297.9	150.6	230.6	147		Not Found	Not Found	Not Found	Not Found	Not Found	High	High	High	High	High	High	7.602e-06	8.138e-11	4.65	9.78	Used	Used	K.ARTLTGPISDPAKLPK.W	[37-52]
	FALSE	High	[K].DINWPLGWPTGGFPGPQGPYYCGVGADK.[S]	1xCarbamidomethyl [C22]	6.64693e-12	5.15092e-05	1	1	64	731354634	731354634 [138-165]		0	3006.39	136.9	111.9	251.6	98.7	132	70.3	15.1	37.9	89.8	55.6		High	High	High	High	High	High	High	High	High	High	High	7.602e-06	4.019e-15	5.09	89.66	Used	Used	K.DINWPLGWPTGGFPGPQGPYYCGVGADK.S	[138-165]
	FALSE	High	[K].DINWPLGWPTGGFPGPQGPYYCGVGADK.[S]	1xCarbamidomethyl [C22]; 1xPhospho [T/Y]	0.159572	0.00524074	1	1	3	731354634	731354634 [138-165]	731354634 1xPhospho [T/Y]	0	3086.35				279	82.4	470.3		92.7	75.7			Not Found	Not Found	Not Found	High	Peak Found	Peak Found	Not Found	Peak Found	Peak Found	Not Found	High	0.0007766	0.01485	0.76	88.26	Used	Used	K.DINWPLGWPTGGFPGPQGPYYCGVGADK.S	[138-165]
	FALSE	High	[K].DINWPLGWPTGGFPGPQGPYYCGVGADKSFGR.[D]	1xCarbamidomethyl [C22]	1.91533e-15	5.15092e-05	1	1	25	731354634	731354634 [138-169]		1	3453.61	10.3	5.3	16.6	0.7	26.8	281.7	88.3	173.3	198.5	198.6		Peak Found	Peak Found	High	High	High	High	High	High	High	High	High	7.602e-06	4.559e-19	5.57	83.11	Used	Used	K.DINWPLGWPTGGFPGPQGPYYCGVGADKSFGR.D	[138-169]
	FALSE	High	[K].DINWPLGWPTGGFPGPQGPYYCGVGADKSFGRDIVDAHYK.[A]	1xCarbamidomethyl [C22]	3.32038e-07	5.15092e-05	1	1	32	731354634	731354634 [138-177]		2	4395.07			7	8.5	18.2	178.4	248.4	168.7	228.2	142.5		Not Found	Not Found	Peak Found	Peak Found	Peak Found	High	High	High	High	High	High	7.602e-06	1.424e-09	6.59	71.15	Used	Used	K.DINWPLGWPTGGFPGPQGPYYCGVGADKSFGRDIVDAHYK.A	[138-177]
	FALSE	High	[R].DIVDAHYK.[A]		0.00513545	0.000145442	1	1	46	731354634	731354634 [170-177]		0	960.479	113.6	106.1	353.4	124	15.1	103.8	33.8	44.6	72.2	33.4		High	High	High	High	High	High	Peak Found	High	High	High	High	2.019e-05	0.0001453	1.69	8.6	Used	Used	R.DIVDAHYK.A	[170-177]
	FALSE	High	[R].DTEKDGKGYFEDR.[R]		6.61228e-08	5.15092e-05	1	1	14	731354634	731354634 [320-332]		2	1559.7	91.6	125.1	46	245.3	490.2					1.8		High	High	High	High	High	Not Found	Not Found	Not Found	Not Found	Peak Found	High	7.602e-06	2.056e-10	4.17	104.17	Used	Used	R.DTEKDGKGYFEDR.R	[320-332]
	FALSE	High	[R].EDGGINVIK.[A]		0.00720492	0.000145442	1	1	6	731354634	731354634 [259-267]		0	944.505	93	1.4	414.5	264.2		46	36.7	31.8	53.7	58.7		High	Peak Found	High	High	Not Found	Peak Found	Peak Found	Peak Found	High	Peak Found	High	3.22e-05	0.0002134	2.27	12	Used	Used	R.EDGGINVIK.A	[259-267]
	FALSE	High	[R].EDGGINVIKAAIEK.[L]	1xGG [K9]	0.00285144	0.000100671	1	1	1	731354634	731354634 [259-272]		1	1570.84	43.5					133.6			822.9			Peak Found	Not Found	Not Found	Not Found	Not Found	Peak Found	Not Found	Not Found	High	Not Found	High	1.369e-05	7.324e-05	2.07	29.62	Used	Used	R.EDGGINVIKAAIEK.L	[259-272]
	FALSE	High	[K].EHIAAYGEGNER.[R]		6.62358e-05	5.15092e-05	1	1	5	731354634	731354634 [279-290]		0	1345.61	181.1	41.8	437.1	340								High	Peak Found	High	High	Not Found	Not Found	Not Found	Not Found	Not Found	Not Found	High	7.602e-06	8.193e-07	2	8.87	Used	Used	K.EHIAAYGEGNER.R	[279-290]
	FALSE	High	[R].GDNILVMCDAYTPAGEPIPTNK.[R]	1xCarbamidomethyl [C8]	0.000209489	5.15092e-05	1	1	8	731354634	731354634 [85-106]		0	2376.12	18.9	96.8	145.9	88.5	40.2	6.9	144.1	168.9	122.8	167		Peak Found	Peak Found	Peak Found	High	High	Peak Found	High	High	High	Peak Found	High	7.602e-06	3.273e-06	2.67	44.72	Used	Used	R.GDNILVMCDAYTPAGEPIPTNK.R	[85-106]
	FALSE	High	[R].GDNILVMCDAYTPAGEPIPTNKR.[Y]	1xCarbamidomethyl [C8]	8.82344e-07	5.15092e-05	1	1	8	731354634	731354634 [85-107]		1	2532.22	120.9	154.8	8.7	142.5		102.4	37.4	56.3	24.8	352.4		High	High	Peak Found	High	Not Found	High	Peak Found	Peak Found	Peak Found	High	High	7.602e-06	4.631e-09	2.41	37.25	Used	Used	R.GDNILVMCDAYTPAGEPIPTNKR.Y	[85-107]
	FALSE	High	[R].GDNILVMCDAYTPAGEPIPTNKR.[Y]	1xCarbamidomethyl [C8]; 1xGG [K/T]	0.0161671	0.000413429	1	1	6	731354634	731354634 [85-107]		1	2646.27							325.7	124.4	272.3	277.5		Not Found	Not Found	Not Found	Not Found	Not Found	Not Found	High	Peak Found	High	High	High	7.552e-05	0.0005377	1.53	37.16	Used	Used	R.GDNILVMCDAYTPAGEPIPTNKR.Y	[85-107]
	FALSE	High	[K].GDWNGAGAHTNYSTK.[S]		4.39727e-06	5.15092e-05	1	1	12	731354634	731354634 [241-255]		0	1578.69	166	78.8	276.6	241.5	28.8	41	22.1	36.6	61.6	47		High	High	High	High	High	Peak Found	High	Peak Found	Peak Found	Peak Found	High	7.602e-06	3.17e-08	2.7	8.01	Used	Used	K.GDWNGAGAHTNYSTK.S	[241-255]
	FALSE	High	[K].GYFEDRRPASNMDPYVVTSMIAETTILGKP.[-]		1.18427e-08	5.15092e-05	1	1	51	731354634	731354634 [327-356]		1	3358.64	125.9	49	29.6	47.9	25.9	192.4	79.7	150.1	195.6	104		High	High	High	High	Peak Found	High	High	High	High	High	High	7.602e-06	2.624e-11	3.82	74.22	Used	Used	K.GYFEDRRPASNMDPYVVTSMIAETTILGKP.-	[327-356]
	FALSE	High	[K].GYFEDRRPASNMDPYVVTSMIAETTILGKP.[-]	1xOxidation [M]	0.00013916	5.15092e-05	1	1	5	731354634	731354634 [327-356]		1	3374.64	6.4	72.4	13.6	104.6	9.8	432.4	47.5	81.2	48.6	183.5		Peak Found	High	Peak Found	High	Peak Found	High	High	Peak Found	Peak Found	High	High	7.602e-06	1.999e-06	3.37	102.33	Used	Used	K.GYFEDRRPASNMDPYVVTSMIAETTILGKP.-	[327-356]
	FALSE	High	[K].GYFEDRRPASNMDPYVVTSMIAETTILGKP.[-]	2xOxidation [M12; M20]	0.0243062	0.000547401	1	1	2	731354634	731354634 [327-356]		1	3390.63	96.3	78.2	239.6	49.2		303.7	137	73	23			Peak Found	Peak Found	Peak Found	Peak Found	Not Found	High	High	Peak Found	Peak Found	Not Found	High	0.0001012	0.0008773	1.34	78.09	Used	Used	K.GYFEDRRPASNMDPYVVTSMIAETTILGKP.-	[327-356]
	FALSE	High	[R].HETADITTFSWGVANR.[G]		5.3327e-13	5.15092e-05	1	1	244	731354634	731354634 [296-311]		0	1804.86	126.1	149.7	53.5	146.4	190.8	85.1	45.5	42.8	72	88.2		High	High	High	High	High	High	High	High	High	High	High	7.602e-06	2.408e-16	4.82	34.5	Used	Used	R.HETADITTFSWGVANR.G	[296-311]
	FALSE	High	[R].HETADITTFSWGVANR.[G]	1xPhospho [S/T]	0.0169052	0.000413429	1	1	3	731354634	731354634 [296-311]	731354634 1xPhospho [T/S]	0	1884.83											No Quan Values	Not Found	Not Found	Not Found	Not Found	Not Found	Not Found	High	Not Found	Not Found	Not Found	High	7.552e-05	0.0005669	1.76		Not Used	Not Used	R.HETADITTFSWGVANR.G	[296-311]
	FALSE	High	[R].HETADITTFSWGVANRGASVR.[V]		0.000404886	5.15092e-05	1	1	4	731354634	731354634 [296-316]		1	2275.12						53.1	298.8	440.5	26.5	181.1		Not Found	Not Found	Not Found	Not Found	Not Found	High	High	High	Peak Found	High	High	7.602e-06	7.197e-06	3.02	28.63	Used	Used	R.HETADITTFSWGVANRGASVR.V	[296-316]
	FALSE	High	[R].HKEHIAAYGEGNER.[R]		4.84672e-08	5.15092e-05	1	1	198	731354634	731354634 [277-290]		1	1610.77	61.9	104.6	70	189	12.7	243.6	46.9	97.6	92.1	81.6		High	High	High	High	High	High	High	High	High	High	High	7.602e-06	1.421e-10	3.2	102.49	Used	Used	R.HKEHIAAYGEGNER.R	[277-290]
	FALSE	High	[R].HKEHIAAYGEGNERR.[L]		2.51015e-06	5.15092e-05	1	1	100	731354634	731354634 [277-291]		2	1766.87	207.3	104.4	155.7	114.3	10.2	250.8	26.1	39.6	53.3	38.2		High	High	High	High	Peak Found	High	High	High	High	High	High	7.602e-06	1.624e-08	4.29	110.39	Used	Used	R.HKEHIAAYGEGNERR.L	[277-291]
	FALSE	High	[R].IAEIAGVVVSFDPKPVK.[G]		9.29309e-09	5.15092e-05	1	1	30	731354634	731354634 [224-240]		0	1769.02	188.3	193.7	41.9	98	392.1	13.3	8	16.3	17.9	30.5		High	High	High	High	High	High	High	High	High	High	High	7.602e-06	1.963e-11	4.36	109.31	Used	Used	R.IAEIAGVVVSFDPKPVK.G	[224-240]
	FALSE	High	[R].IAEIAGVVVSFDPKPVKGDWNGAGAHTNYSTK.[S]		1.96628e-09	5.15092e-05	1	1	15	731354634	731354634 [224-255]		1	3328.7	8.2		1.9			150.5	372.4	64.6	99.3	303.2		Peak Found	Not Found	Peak Found	Not Found	Not Found	High	High	High	High	High	High	7.602e-06	3.033e-12	7.36	95.81	Used	Used	R.IAEIAGVVVSFDPKPVKGDWNGAGAHTNYSTK.S	[224-255]
	FALSE	High	[K].IFSHPDVVAEEPWYGIEQEYTLLQK.[D]		3.04592e-12	5.15092e-05	1	1	215	731354634	731354634 [113-137]		0	2991.48	88.3	62	79	172.4	162.9	133.3	45.5	52.1	82.7	122		High	High	High	High	High	High	High	High	High	High	High	7.602e-06	1.681e-15	5.89	111.44	Used	Used	K.IFSHPDVVAEEPWYGIEQEYTLLQK.D	[113-137]
	FALSE	High	[K].IIAEYIWIGGSGLDMR.[S]		1.56928e-06	5.15092e-05	1	1	2	731354634	731354634 [19-34]		0	1793.93	300.7			165.2	458.7	22.8	21.2	28.2	3.2			High	Not Found	Not Found	Peak Found	Peak Found	Peak Found	Peak Found	High	Peak Found	Not Found	High	7.602e-06	9.246e-09	2.32	111.23	Used	Used	K.IIAEYIWIGGSGLDMR.S	[19-34]
	FALSE	High	[K].LPKWNYDGSSTNQAPGEDSEVILYPQAIFKDPFR.[R]		0.00557897	0.000145442	1	1	3	731354634	731354634 [50-83]		2	3882.9	32.6		77.8	42.7		247.1		360.1		239.7		Peak Found	Not Found	Peak Found	Peak Found	Not Found	Peak Found	High	High	Not Found	High	High	2.667e-05	0.0001593	2.31	70.91	Used	Used	K.LPKWNYDGSSTNQAPGEDSEVILYPQAIFKDPFR.R	[50-83]
	FALSE	High	[R].LTGRHETADITTFSWGVANR.[G]		1.84847e-11	5.15092e-05	1	1	145	731354634	731354634 [292-311]		1	2232.12	44.8	51.7	2.8	33.9	18.7	155.6	179.1	199.4	131.1	182.9		High	High	Peak Found	High	High	High	High	High	High	High	High	7.602e-06	1.253e-14	5.68	27.84	Used	Used	R.LTGRHETADITTFSWGVANR.G	[292-311]
	FALSE	High	[R].LTGRHETADITTFSWGVANRGASVR.[V]		4.13139e-09	5.15092e-05	1	1	9	731354634	731354634 [292-316]		2	2702.38	2.5		2.5	6.7	19.2	248.4	183.9	377.7		159.2		Peak Found	Not Found	Peak Found	Peak Found	Peak Found	High	High	High	Not Found	High	High	7.602e-06	7.394e-12	6.35	27.35	Used	Used	R.LTGRHETADITTFSWGVANRGASVR.V	[292-316]
	FALSE	High	[-].MALLNDLINLNLSETSDK.[I]	1xMet-loss+Acetyl [N-Term]	1.56652e-09	5.15092e-05	1	1	23	731354634	731354634 [1-18]	731354634 1xMet-loss+Acetyl [N-Term]	0	1915	148.6	122.2	146.3	161.5	340.6	4.8	11.2	19.3	23	22.6		High	High	High	High	High	High	High	High	High	High	High	7.602e-06	2.311e-12	3.49	110.23	Used	Used	-.MALLNDLINLNLSETSDK.I	[1-18]
	FALSE	High	[-].MALLNDLINLNLSETSDKIIAEYIWIGGSGLDMR.[S]	1xMet-loss+Acetyl [N-Term]	4.6259e-10	5.15092e-05	1	1	54	731354634	731354634 [1-34]	731354634 1xMet-loss+Acetyl [N-Term]	1	3689.91	124.4	143	52.3	120	84.1	92.7	42.3	199.8	88.9	52.5		High	High	High	High	High	High	High	High	High	High	High	7.602e-06	5.342e-13	4.97	109.21	Used	Used	-.MALLNDLINLNLSETSDKIIAEYIWIGGSGLDMR.S	[1-34]
	FALSE	High	[-].MALLNDLINLNLSETSDKIIAEYIWIGGSGLDMR.[S]	1xOxidation [M33]; 1xMet-loss+Acetyl [N-Term]	3.80551e-07	5.15092e-05	1	1	21	731354634	731354634 [1-34]	731354634 1xMet-loss+Acetyl [N-Term]	1	3705.9	102.1	166	58.9	172.8	140.7	101.6	62.8	101.2	56.8	36.9		High	High	High	High	High	High	High	High	High	High	High	7.602e-06	1.686e-09	3.83	109.01	Used	Used	-.MALLNDLINLNLSETSDKIIAEYIWIGGSGLDMR.S	[1-34]
	FALSE	High	[R].RGDNILVMCDAYTPAGEPIPTNK.[R]	1xCarbamidomethyl [C9]	5.1017e-11	5.15092e-05	1	1	46	731354634	731354634 [84-106]		1	2532.22	62.6	89.2	2.8	73.4	81.2	81.7	115.5	262.9	190.8	39.9		High	High	Peak Found	High	High	High	High	High	High	High	High	7.602e-06	3.89e-14	4.01	35.36	Used	Used	R.RGDNILVMCDAYTPAGEPIPTNK.R	[84-106]
	FALSE	High	[R].RGDNILVMCDAYTPAGEPIPTNK.[R]	1xCarbamidomethyl [C9]; 1xOxidation [M8]	8.06557e-05	5.15092e-05	1	1	9	731354634	731354634 [84-106]		1	2548.22	58.4	81.7	28.8	164	70.6	26.9	179.2	245.7	70.8	73.8		High	High	Peak Found	High	High	Peak Found	Peak Found	High	High	High	High	7.602e-06	1.044e-06	2.38	28.22	Used	Used	R.RGDNILVMCDAYTPAGEPIPTNK.R	[84-106]
	FALSE	High	[R].RGDNILVMCDAYTPAGEPIPTNKR.[Y]	1xCarbamidomethyl [C9]	4.90629e-13	5.15092e-05	1	1	176	731354634	731354634 [84-107]		2	2688.32	84.2	116.3	9.8	62.7	58.1	111.4	128.3	149.7	110	169.5		High	High	High	High	High	High	High	High	High	High	High	7.602e-06	2.209e-16	5.49	28.98	Used	Used	R.RGDNILVMCDAYTPAGEPIPTNKR.Y	[84-107]
	FALSE	High	[R].RGDNILVMCDAYTPAGEPIPTNKR.[Y]	1xCarbamidomethyl [C9]; 1xOxidation [M8]	4.65834e-11	5.15092e-05	1	1	21	731354634	731354634 [84-107]		2	2704.32	98.1	174.8	13.1	145.8	65.9	120.9	36.7	137.4	33.4	173.7		High	High	Peak Found	High	High	High	High	High	High	High	High	7.602e-06	3.511e-14	4.88	15.48	Used	Used	R.RGDNILVMCDAYTPAGEPIPTNKR.Y	[84-107]
	FALSE	High	[R].RGDNILVMCDAYTPAGEPIPTNKR.[Y]	1xCarbamidomethyl [C9]; 1xGG [K/T]	3.45059e-06	5.15092e-05	1	1	15	731354634	731354634 [84-107]		2	2802.37	5.4	13.5		13.6	9.8	25.7	426.9	137.6	214.7	152.8		Peak Found	Peak Found	Not Found	Peak Found	Peak Found	Peak Found	High	High	High	High	High	7.602e-06	2.365e-08	3.42	28.12	Used	Used	R.RGDNILVMCDAYTPAGEPIPTNKR.Y	[84-107]
	FALSE	High	[R].RLTGRHETADITTFSWGVANR.[G]		4.55633e-10	5.15092e-05	1	1	122	731354634	731354634 [291-311]		2	2388.22	3.5	2.4	4.4	1.6		139.1	233.8	242.8	175.1	197.2		Peak Found	Peak Found	Peak Found	Peak Found	Not Found	High	High	High	High	High	High	7.602e-06	5.253e-13	4.75	27.21	Used	Used	R.RLTGRHETADITTFSWGVANR.G	[291-311]
	FALSE	High	[R].RPASNMDPYVVTSMIAETTILGKP.[-]		1.05457e-12	5.15092e-05	1	1	77	731354634	731354634 [333-356]		0	2591.32	166.8	170.3	45.1	198.2	101.1	121.3	48	45.4	56	47.7		High	High	High	High	High	High	High	High	High	High	High	7.602e-06	5.165e-16	6.46	113.04	Used	Used	R.RPASNMDPYVVTSMIAETTILGKP.-	[333-356]
	FALSE	High	[R].RPASNMDPYVVTSMIAETTILGKP.[-]	1xOxidation [M]	1.11397e-09	5.15092e-05	1	1	22	731354634	731354634 [333-356]		0	2607.32	112.6	173.5	37.4	161.5	232.6	148.3	44.3	32.9	30.8	26		High	High	High	High	High	High	High	High	High	High	High	7.602e-06	1.536e-12	2.57	110.7	Used	Used	R.RPASNMDPYVVTSMIAETTILGKP.-	[333-356]
	FALSE	High	[R].RPASNMDPYVVTSMIAETTILGKP.[-]	2xOxidation [M6; M14]	9.02628e-07	5.15092e-05	1	1	2	731354634	731354634 [333-356]		0	2623.31						678.2		62.5	213.4	46		Not Found	Not Found	Not Found	Not Found	Not Found	High	Not Found	Peak Found	Peak Found	Peak Found	High	7.602e-06	4.746e-09	4.17	75.85	Used	Used	R.RPASNMDPYVVTSMIAETTILGKP.-	[333-356]
	FALSE	High	[K].SFGRDIVDAHYK.[A]		1.31909e-05	5.15092e-05	1	1	60	731354634	731354634 [166-177]		1	1407.7	8.1	85.7	41.4	79.9	37.5	44.4	178.6	179.7	223.8	120.9		High	High	High	High	High	High	High	High	High	High	High	7.602e-06	1.185e-07	3.63	16.05	Used	Used	K.SFGRDIVDAHYK.A	[166-177]
	FALSE	High	[K].SMREDGGINVIK.[A]		1.57019e-05	5.15092e-05	1	1	68	731354634	731354634 [256-267]		1	1318.68	36.2	34.9	63.2	40.1	57.5	191.7	130.9	141.5	183.3	120.8		High	High	High	High	High	High	High	High	High	High	High	7.602e-06	1.464e-07	3.23	9.35	Used	Used	K.SMREDGGINVIK.A	[256-267]
	FALSE	High	[K].SMREDGGINVIK.[A]	1xOxidation [M2]	6.28148e-05	5.15092e-05	1	1	14	731354634	731354634 [256-267]		1	1334.67	73.6		224.8	203.3		138.1	59.9	116.4	115.3	68.8		High	Not Found	High	High	Not Found	High	High	High	High	High	High	7.602e-06	7.72e-07	2.96	8.34	Used	Used	K.SMREDGGINVIK.A	[256-267]
	FALSE	High	[K].SMREDGGINVIKAAIEK.[L]		9.6462e-10	5.15092e-05	1	1	41	731354634	731354634 [256-272]		2	1830.97		5.8	3.5	1.3		107.9	114.5	406.7	102.9	257.4		Not Found	Peak Found	Peak Found	Peak Found	Not Found	High	High	High	High	High	High	7.602e-06	1.292e-12	4.48	27.16	Used	Used	K.SMREDGGINVIKAAIEK.L	[256-272]
	FALSE	High	[K].SMREDGGINVIKAAIEK.[L]	1xGG [K12]	2.43523e-06	5.15092e-05	1	1	11	731354634	731354634 [256-272]		2	1945.02							307.1	15.9	455	222.1		Not Found	Not Found	Not Found	Not Found	Not Found	Not Found	High	Peak Found	High	High	High	7.602e-06	1.564e-08	3.02	20.75	Used	Used	K.SMREDGGINVIKAAIEK.L	[256-272]
[truncated: 33,845 more rows]
[truncated: 87 more columns]
