# Supplementary material for: Comparative Ubiquitination Proteomics Revealed the Salt Tolerance Mechanism in Sugar Beet Monomeric Additional Line M14
Source: Int J Mol Sci. 2022 Dec 17;23(24):16088. doi: 10.3390/ijms232416088 (PMC9782053; doi:10.3390/ijms232416088)
Supplement: Supplementary file 1 [file ijms-23-16088-s001.zip › Table S4 Differential expression of ubiquitinated proteins in the roots of sugar beet M14 line under 200 mM NaCl stress.xlsx]

## Sheet: PeptideGroups
Checked	Tags	Confidence	PSM Ambiguity	Sequence	Annotated Sequence	Modifications	Modifications (all possible sites)	Qvality PEP	Qvality q-value	SVM_Score	# Protein Groups	# Proteins	# PSMs	Master Protein Accessions	Positions in Master Proteins	Modifications in Master Proteins (all Sites)	Modifications in Master Proteins	Master Protein Descriptions	Protein Accessions	# Missed Cleavages	Theo. MH+ [Da]	Sequence Length	Abundances (Scaled): F1: Control	Abundances (Scaled): F2: Control	Abundances (Scaled): F3: Control	Abundances (Scaled): F4: Control	Abundances (Scaled): F5: Control	Abundances (Scaled): F6: Sample	Abundances (Scaled): F7: Sample	Abundances (Scaled): F8: Sample	Abundances (Scaled): F9: Sample	Abundances (Scaled): F10: Sample	Abundance: F1: Control	Abundance: F2: Control	Abundance: F3: Control	Abundance: F4: Control	Abundance: F5: Control	Abundance: F6: Sample	Abundance: F7: Sample	Abundance: F8: Sample	Abundance: F9: Sample	Abundance: F10: Sample	Abundances (Normalized): F1: Control	Abundances (Normalized): F2: Control	Abundances (Normalized): F3: Control	Abundances (Normalized): F4: Control	Abundances (Normalized): F5: Control	分割线	Abundances (Normalized): F6: Sample
FALSE		High	Unambiguous	AAAAAGLTVAEVTGSNVVSVAEDELMR	[K].AAAAAGLTVAEVTGSNVVSVAEDELMR.[I]			9.05361e-10	5.33751e-05	3.885	1	1	26	731366157	731366157 [141-167]			PREDICTED: formate dehydrogenase 1, mitochondrial [Beta vulgaris subsp. vulgaris]	731366157	0	2631.33	27	54.6	176.2	158.1	92.3	13.3	106.2	107.7	122.3	104.2	65.2	7780751	51064494	2.83189e+07	1.35939e+07	752769	2.53418e+07	1.31635e+07	2.1056e+07	2.20056e+07	1.32523e+07	1.58125e+07	51064494	4.5799e+07	2.67299e+07	3.86191e+06		3.07806e+07
FALSE		High	Unambiguous	MAESRPYDLIILGASGFTGK	[-].MAESRPYDLIILGASGFTGK.[Y]	1xMet-loss+Acetyl [N-Term]	1xMet-loss+Acetyl [N-Term]	1.88991e-05	5.33751e-05	1.743	1	1	11	731319353	731319353 [1-20]	731319353 1xMet-loss+Acetyl [N-Term]	731319353 1xMet-loss+Acetyl [N-Term]	PREDICTED: probable mitochondrial saccharopine dehydrogenase-like oxidoreductase At5g39410 [Beta vulgaris subsp. vulgaris]	731319353	0	2037.07	20		271.5	13	83.1	95.6	56.3	24.5	227.1	131	98.1		5.82869e+06	172202	907134	399925	994298	221894	2.8977e+06	2.05024e+06	1.47763e+06		5.82869e+06	278496	1.78371e+06	2.05172e+06		1.20769e+06
FALSE		High	Unambiguous	MAEQTEKAFLKQPK	[-].MAEQTEKAFLKQPK.[L]	1xMet-loss+Acetyl [N-Term]	1xMet-loss+Acetyl [N-Term]	6.509e-07	5.33751e-05	2.47	2	2	17	731316767; 731352879	731316767 [1-14]; 731352879 [1-14]	731316767 1xMet-loss+Acetyl [N-Term]; 731352879 1xMet-loss+Acetyl [N-Term]	731316767 1xMet-loss+Acetyl [N-Term]; 731352879 1xMet-loss+Acetyl [N-Term]	PREDICTED: 40S ribosomal protein S11 [Beta vulgaris subsp. vulgaris] PREDICTED: 40S ribosomal protein S11-3 [Beta vulgaris subsp. vulgaris]	731316767; 731352879	2	1559.84	14	571.7	75.5	9.2	78.1	95.9	0.2	14.1	56.8	52.5	46	6.96678e+07	1.8685e+07	1.41114e+06	9.83713e+06	4.62888e+06	38306.4	1.47067e+06	8.35404e+06	9.48495e+06	8.0009e+06	1.41583e+08	1.8685e+07	2.28217e+06	1.93429e+07	2.37474e+07		46527.6
FALSE		High	Unambiguous	MAEQLTDEQIAEFKEAFSLFDKDGDGCITTK	[-].MAEQLTDEQIAEFKEAFSLFDKDGDGCITTK.[E]	1xCarbamidomethyl [C27]; 1xMet-loss+Acetyl [N-Term]	1xCarbamidomethyl [C27]; 1xMet-loss+Acetyl [N-Term]	3.11707e-12	5.33751e-05	5.105	1	1	67	731324890	731324890 [1-31]	731324890 1xMet-loss+Acetyl [N-Term]	731324890 1xMet-loss+Acetyl [N-Term]	PREDICTED: calmodulin [Beta vulgaris subsp. vulgaris]	731324890	2	3448.61	31		104.7	223.2	178.2	98.7	90.9	99.5	46.6	83.7	74.5		7.76058e+07	1.02318e+08	6.71734e+07	1.42681e+07	5.5489e+07	3.11287e+07	2.0537e+07	4.52257e+07	3.87477e+07		7.76058e+07	1.65475e+08	1.32084e+08	7.31992e+07		6.73979e+07
FALSE		High	Unambiguous	MAEQLTDEQIAEFK	[-].MAEQLTDEQIAEFK.[E]	1xMet-loss+Acetyl [N-Term]	1xMet-loss+Acetyl [N-Term]	2.28214e-06	5.33751e-05	2.2	1	1	22	731324890	731324890 [1-14]	731324890 1xMet-loss+Acetyl [N-Term]	731324890 1xMet-loss+Acetyl [N-Term]	PREDICTED: calmodulin [Beta vulgaris subsp. vulgaris]	731324890	0	1563.75	14	81.5	127.7	3.7	55.8	81.1	123	111.9	136.5	124.2	154.5	3.65604e+06	1.16432e+07	208723	2.58908e+06	1.44032e+06	9.23204e+06	4.30579e+06	7.39479e+06	8.25536e+06	9.88501e+06	7.43003e+06	1.16432e+07	337559	5.09095e+06	7.38921e+06		1.12134e+07
FALSE		High	Unambiguous	MAELLNPDGELLTLIFPISDHVGGPPYKVSVSDYEEVLAPFGFK	[R].MAELLNPDGELLTLIFPISDHVGGPPYKVSVSDYEEVLAPFGFK.[A]			4.35494e-05	5.33751e-05	1.559	1	3	3	1108900425	1108900425 [173-216]			PREDICTED: probable thiol methyltransferase 2 isoform X1 [Beta vulgaris subsp. vulgaris]	731323585; 1108900425; 1108900434	1	4804.45	44	600.1	198.5			201.4						5454138	3.66712e+06			725041						1.10842e+07	3.66712e+06			3.71965e+06
FALSE		High	Unambiguous	MAELLNPDGELLTLIFPISDHVGGPPYK	[R].MAELLNPDGELLTLIFPISDHVGGPPYK.[V]			3.41133e-07	5.33751e-05	2.609	1	3	8	1108900425	1108900425 [173-200]			PREDICTED: probable thiol methyltransferase 2 isoform X1 [Beta vulgaris subsp. vulgaris]	731323585; 1108900425; 1108900434	0	3036.58	28	57.6	116.5	145.3	195.2	33.8	222.1	90.8	18.1	80.9	39.6	1.20487e+06	4.95306e+06	3.81782e+06	4.21853e+06	280176	7.77074e+06	1.62857e+06	458302	2.5072e+06	1182224	2.44862e+06	4.95306e+06	6.17441e+06	8.29497e+06	1.43738e+06		9.43847e+06
FALSE		High	Unambiguous	MAEIGKIVLNSGWLAAR	[-].MAEIGKIVLNSGWLAAR.[S]	1xMet-loss+Acetyl [N-Term]	1xMet-loss+Acetyl [N-Term]	7.93651e-05	5.33751e-05	1.422	1	1	1	731327872	731327872 [1-17]	731327872 1xMet-loss+Acetyl [N-Term]	731327872 1xMet-loss+Acetyl [N-Term]	PREDICTED: mannosylglycoprotein endo-beta-mannosidase isoform X1 [Beta vulgaris subsp. vulgaris]	731327872	1	1739.98	17								812.3	82.8	104.9								335639	41962.3	51152.6
FALSE		High	Unambiguous	MAEKSEVLEAVLKEAVDLENIPLEEVFENLR	[-].MAEKSEVLEAVLKEAVDLENIPLEEVFENLR.[C]	1xMet-loss+Acetyl [N-Term]	1xMet-loss+Acetyl [N-Term]	1.77389e-08	5.33751e-05	3.245	1	1	12	731335165	731335165 [1-31]	731335165 1xMet-loss+Acetyl [N-Term]	731335165 1xMet-loss+Acetyl [N-Term]	PREDICTED: plasma membrane ATPase 1 [Beta vulgaris subsp. vulgaris]	731335165	2	3467.82	31	229.3	38.4	62.1	47.9	351.5	31.5	47.2	118.9	11.7	61.6	1.14309e+07	3.89183e+06	3.89039e+06	2.46733e+06	6.94083e+06	2.6308e+06	2.01697e+06	7.16101e+06	861591	4.37929e+06	2.32305e+07	3.89183e+06	6.29176e+06	4.85156e+06	3.56083e+07		3.19541e+06
FALSE		High	Unambiguous	MAETDMVELGLSDGGPTWQHLLGSHNWDHLLDPLNEDLRR	[-].MAETDMVELGLSDGGPTWQHLLGSHNWDHLLDPLNEDLRR.[L]	1xMet-loss+Acetyl [N-Term]	1xMet-loss+Acetyl [N-Term]	2.52075e-05	5.33751e-05	1.68	1	1	4	731356756	731356756 [1-40]	731356756 1xMet-loss+Acetyl [N-Term]	731356756 1xMet-loss+Acetyl [N-Term]	PREDICTED: phospholipase A1-IIdelta [Beta vulgaris subsp. vulgaris]	731356756	1	4479.14	40	498.4	20.9	37.1	38.6	95.3	129.2	18.1	12.5	129.1	20.9	5.0417e+06	429381	471726	403380	381975	2186314	156716	152775	1.9345e+06	301625	1.0246e+07	429381	762904	793174	1.95963e+06		2.65553e+06
FALSE		High	Unambiguous	MAEKHFKYVILGGGVAAGYAAR	[-].MAEKHFKYVILGGGVAAGYAAR.[E]	1xMet-loss+Acetyl [N-Term]	1xMet-loss+Acetyl [N-Term]	2.15311e-07	5.33751e-05	2.708	1	1	36	731345172	731345172 [1-22]	731345172 1xMet-loss+Acetyl [N-Term]	731345172 1xMet-loss+Acetyl [N-Term]	PREDICTED: monodehydroascorbate reductase [Beta vulgaris subsp. vulgaris]	731345172	2	2220.19	22	4.6	85.2	1.6	87.9	96.8	4.8	13.6	519.9	81.9	103.7	752159	2.83328e+07	324777	1.48592e+07	6.27317e+06	1.31619e+06	1.90892e+06	1.02742e+08	1.98542e+07	2.41909e+07	1.52859e+06	2.83328e+07	525249	2.92179e+07	3.2183e+07		1.59867e+06
FALSE		High	Unambiguous	MAEHLASIFGTEKDRVNCPFYFK	[-].MAEHLASIFGTEKDRVNCPFYFK.[I]	1xCarbamidomethyl [C18]; 1xMet-loss+Acetyl [N-Term]	1xCarbamidomethyl [C18]; 1xMet-loss+Acetyl [N-Term]	1.78051e-05	5.33751e-05	1.756	2	2	14	731345365; 1108950912	731345365 [1-23]; 1108950912 [1-23]	731345365 1xMet-loss+Acetyl [N-Term]; 1108950912 1xMet-loss+Acetyl [N-Term]	731345365 1xMet-loss+Acetyl [N-Term]; 1108950912 1xMet-loss+Acetyl [N-Term]	PREDICTED: splicing factor U2af small subunit B [Beta vulgaris subsp. vulgaris] PREDICTED: splicing factor U2af small subunit A [Beta vulgaris subsp. vulgaris]	731345365; 1108950912	2	2671.3	23		106	133.1	234.9	22	96.3	180.5	62.7	77.5	86.9		1.26503e+07	9821533	1.42526e+07	512511	9.46185e+06	9.0884e+06	4.44551e+06	6.74358e+06	7.28062e+06		1.26503e+07	1.5884e+07	2.80251e+07	2.62932e+06		1.14925e+07
FALSE		High	Unambiguous	MAEHLASIFGTEKDR	[-].MAEHLASIFGTEKDR.[V]	1xMet-loss+Acetyl [N-Term]	1xMet-loss+Acetyl [N-Term]	3.53073e-06	5.33751e-05	2.106	2	2	13	731345365; 1108950912	731345365 [1-15]; 1108950912 [1-15]	731345365 1xMet-loss+Acetyl [N-Term]; 1108950912 1xMet-loss+Acetyl [N-Term]	731345365 1xMet-loss+Acetyl [N-Term]; 1108950912 1xMet-loss+Acetyl [N-Term]	PREDICTED: splicing factor U2af small subunit B [Beta vulgaris subsp. vulgaris] PREDICTED: splicing factor U2af small subunit A [Beta vulgaris subsp. vulgaris]	731345365; 1108950912	1	1615.81	15		73.9	155.3	39	261.4	116.6	137	39.5	95.9	81.4		3.56152e+06	4.62792e+06	956253	2.45463e+06	4.62331e+06	2.78567e+06	1.13048e+06	3.37008e+06	2.75138e+06		3.56152e+06	7.48454e+06	1.8803e+06	1.25929e+07		5.61555e+06
FALSE		High	Unambiguous	MAEHGEHEAPHHEGETLMEK	[-].MAEHGEHEAPHHEGETLMEK.[I]	1xMet-loss+Acetyl [N-Term]	1xMet-loss+Acetyl [N-Term]	5.95826e-10	5.33751e-05	3.975	1	1	5	731311481	731311481 [1-20]	731311481 1xMet-loss+Acetyl [N-Term]	731311481 1xMet-loss+Acetyl [N-Term]	PREDICTED: reticulon-like protein B4 [Beta vulgaris subsp. vulgaris]	731311481	0	2209.96	20	166.9	24	135.5	410.1	143.5	1	1.3	72.5	32.3	12.7	4.33566e+06	1.26937e+06	4.4236e+06	1.10081e+07	1.47662e+06	41559.5	29340.1	2.27594e+06	1.24266e+06	471806	8.81119e+06	1.26937e+06	7.1541e+06	2.16455e+07	7.57546e+06		50478.8
FALSE		High	Unambiguous	MAEHEAPKAESIMEK	[-].MAEHEAPKAESIMEK.[I]	1xMet-loss+Acetyl [N-Term]	1xMet-loss+Acetyl [N-Term]	2.56909e-07	5.33751e-05	2.67	1	1	30	731330927	731330927 [1-15]	731330927 1xMet-loss+Acetyl [N-Term]	731330927 1xMet-loss+Acetyl [N-Term]	PREDICTED: reticulon-like protein B2 [Beta vulgaris subsp. vulgaris]	731330927	1	1611.77	15	132.5	87.8	42.1	91.9	108	92	101.1	93	127.4	124.1	2.35636e+07	3.17102e+07	9.406e+06	1.68919e+07	7.60745e+06	2.73786e+07	1.54155e+07	1.99752e+07	3.35502e+07	3.14659e+07	4.78875e+07	3.17102e+07	1.52119e+07	3.32147e+07	3.90283e+07		3.32545e+07
FALSE		High	Unambiguous	MAEGEVAAYNSELLEFPKKDK	[-].MAEGEVAAYNSELLEFPKKDK.[R]	1xMet-loss+Acetyl [N-Term]	1xMet-loss+Acetyl [N-Term]	3.6473e-06	5.33751e-05	2.099	1	1	14	731351034	731351034 [1-21]	731351034 1xMet-loss+Acetyl [N-Term]	731351034 1xMet-loss+Acetyl [N-Term]	PREDICTED: putative lactoylglutathione lyase [Beta vulgaris subsp. vulgaris]	731351034	2	2280.14	21	304.7	160.5	23.6	43.3	110.8	90	55.5	50.2	71.2	90.3	8.736e+06	9.35252e+06	849844	1.28401e+06	1.25802e+06	4.31518e+06	1.36493e+06	1.73788e+06	3.02235e+06	3.69135e+06	1.77538e+07	9.35252e+06	1.37442e+06	2.52476e+06	6.45398e+06		5.24129e+06
FALSE		High	Unambiguous	MAEGEVAAYNSELLEFPK	[-].MAEGEVAAYNSELLEFPK.[K]	1xMet-loss+Acetyl [N-Term]	1xMet-loss+Acetyl [N-Term]	7.04414e-07	5.33751e-05	2.453	1	1	6	731351034	731351034 [1-18]	731351034 1xMet-loss+Acetyl [N-Term]	731351034 1xMet-loss+Acetyl [N-Term]	PREDICTED: putative lactoylglutathione lyase [Beta vulgaris subsp. vulgaris]	731351034	0	1908.92	18	60.5	249.1	16	18.5	46.7	96.3	59.5	306.9	95.7	50.8	419864	3.51312e+06	139914	132588	128468	1.11883e+06	354052	2.57335e+06	983869	502443	853273	3.51312e+06	226277	260711	659073		1.35895e+06
FALSE		High	Unambiguous	MAEEVKVLGLWQSPFVMRPR	[-].MAEEVKVLGLWQSPFVMRPR.[I]	1xMet-loss+Acetyl [N-Term]	1xMet-loss+Acetyl [N-Term]	4.30387e-07	5.33751e-05	2.559	1	1	10	731344227	731344227 [1-20]	731344227 1xMet-loss+Acetyl [N-Term]	731344227 1xMet-loss+Acetyl [N-Term]	PREDICTED: glutathione S-transferase U17 [Beta vulgaris subsp. vulgaris]	731344227	1	2284.23	20	249	85.9		175.9	95.4	110.9	82.9	99.4	67	33.8	6890752	4831624		5.03089e+06	1.04568e+06	5.13378e+06	1.96816e+06	3.32372e+06	2.7464e+06	1.3328e+06	1.40038e+07	4831624		9.89232e+06	5.36464e+06		6.23557e+06
FALSE		High	Unambiguous	MAEENSTRPLFVLYDSMTK	[-].MAEENSTRPLFVLYDSMTK.[H]	1xMet-loss+Acetyl [N-Term]	1xMet-loss+Acetyl [N-Term]	2.72362e-05	5.33751e-05	1.663	1	1	12	731340629	731340629 [1-19]	731340629 1xMet-loss+Acetyl [N-Term]	731340629 1xMet-loss+Acetyl [N-Term]	PREDICTED: cysteine--tRNA ligase 2, cytoplasmic isoform X1 [Beta vulgaris subsp. vulgaris]	731340629	0	2143.04	19	110.5	244.8	28.2	140.2	70.6	80.4	105.9	118	66.3	35	2.06819e+06	9.30701e+06	662467	2.71081e+06	523629	2.51685e+06	1.69976e+06	2667143	1.83873e+06	935203	4.20311e+06	9.30701e+06	1.07138e+06	5.33032e+06	2.68636e+06		3.05701e+06
FALSE		High	Unambiguous	MAEKENQQLNYIEETVLK	[-].MAEKENQQLNYIEETVLK.[K]	1xMet-loss+Acetyl [N-Term]	1xMet-loss+Acetyl [N-Term]	1.3883e-06	5.33751e-05	2.307	1	1	1	731360059	731360059 [1-18]	731360059 1xMet-loss+Acetyl [N-Term]	731360059 1xMet-loss+Acetyl [N-Term]	PREDICTED: 60S ribosomal protein L7-2 [Beta vulgaris subsp. vulgaris]	731360059	1	2091.06	18	553.7	304.3						89.8		52.2	1.05922e+06	1.18299e+06						207408		142411	2.15261e+06	1.18299e+06
FALSE		High	Unambiguous	MAEENSINNNECYDLSSLFSSEERDFLIR	[-].MAEENSINNNECYDLSSLFSSEERDFLIR.[N]	1xCarbamidomethyl [C12]; 1xMet-loss+Acetyl [N-Term]	1xCarbamidomethyl [C12]; 1xMet-loss+Acetyl [N-Term]	2.35192e-07	5.33751e-05	2.689	1	1	12	731342734	731342734 [1-29]	731342734 1xMet-loss+Acetyl [N-Term]	731342734 1xMet-loss+Acetyl [N-Term]	PREDICTED: probable nucleoredoxin 1 [Beta vulgaris subsp. vulgaris]	731342734	1	3393.52	29		140	249	187.4	157	31.5	66.4	55.4	46.7	66.7		10976804	12071334	7.47238e+06	2.39967e+06	2034961	2.19587e+06	2.58347e+06	2.66721e+06	3.67075e+06		10976804	1.95225e+07	1.46931e+07	1.2311e+07		2.4717e+06
FALSE		High	Unambiguous	MAETSSVKLHGMWASPFAMR	[-].MAETSSVKLHGMWASPFAMR.[A]	1xMet-loss+Acetyl [N-Term]	1xMet-loss+Acetyl [N-Term]	3.57364e-07	5.33751e-05	2.599	1	1	3	731335057	731335057 [1-20]	731335057 1xMet-loss+Acetyl [N-Term]	731335057 1xMet-loss+Acetyl [N-Term]	PREDICTED: glutathione S-transferase U10 [Beta vulgaris subsp. vulgaris]	731335057	1	2148.04	20	307.6	97.5		33	76		49.4	289.7	90.3	56.4	4.49832e+06	2.89821e+06		498695	440453		619208	5.11763e+06	1.95613e+06	1.17589e+06	9.14177e+06	2.89821e+06		980592	2.25964e+06
FALSE		High	Unambiguous	LVDAPVSGGVKR	[K].LVDAPVSGGVKR.[A]	1xGG [K11]	1xGG [K11]	8.0045e-05	5.33751e-05	1.42	1	1	1	731364401	731364401 [442-453]			PREDICTED: uncharacterized protein LOC104906826 [Beta vulgaris subsp. vulgaris]	731364401	1	1311.74	12
FALSE		High	Unambiguous	MAGPFQEVAFSTAVGATSGPFK	[K].MAGPFQEVAFSTAVGATSGPFK.[S]			2.89191e-06	5.33751e-05	2.149	1	1	6	731334949	731334949 [108-129]			PREDICTED: peptidyl-prolyl cis-trans isomerase NIMA-interacting 4 [Beta vulgaris subsp. vulgaris]	731334949	0	2200.07	22	421.7	369.6						159.5	35.7	13.5	3557914	6.33775e+06						1.62534e+06	446458	162249	7.23062e+06	6.33775e+06
FALSE		High	Unambiguous	MAGNGLFADIIDGEVFKYYADGEWKISSSGK	[-].MAGNGLFADIIDGEVFKYYADGEWKISSSGK.[S]	1xMet-loss+Acetyl [N-Term]	1xMet-loss+Acetyl [N-Term]	4.00751e-09	5.33751e-05	3.565	1	1	1	731316849	731316849 [1-31]	731316849 1xMet-loss+Acetyl [N-Term]	731316849 1xMet-loss+Acetyl [N-Term]	PREDICTED: NADP-dependent glyceraldehyde-3-phosphate dehydrogenase [Beta vulgaris subsp. vulgaris]	731316849	2	3279.58	31	1000										10105565										2.05372e+07
FALSE		High	Unambiguous	MAGNGLFADIIDGEVFK	[-].MAGNGLFADIIDGEVFK.[Y]	1xMet-loss+Acetyl [N-Term]	1xMet-loss+Acetyl [N-Term]	5.85315e-06	5.33751e-05	1.997	1	1	3	731316849	731316849 [1-17]	731316849 1xMet-loss+Acetyl [N-Term]	731316849 1xMet-loss+Acetyl [N-Term]	PREDICTED: NADP-dependent glyceraldehyde-3-phosphate dehydrogenase [Beta vulgaris subsp. vulgaris]	731316849	0	1707.86	17	170.7	13.9	51.3	17.9	215	203.9	108.4	78.1	47.7	93.1	1.88561e+06	312819	711646	204625	940541	3767997	1.0268e+06	1.04181e+06	780411	1.46751e+06	3.83205e+06	312819	1.15092e+06	402357	4.82522e+06		4.57667e+06
FALSE		High	Unambiguous	MAGLIDKAKEFVAEK	[-].MAGLIDKAKEFVAEK.[I]	1xMet-loss+Acetyl [N-Term]	1xMet-loss+Acetyl [N-Term]	4.11492e-06	5.33751e-05	2.073	1	1	9	731311491	731311491 [1-15]	731311491 1xMet-loss+Acetyl [N-Term]	731311491 1xMet-loss+Acetyl [N-Term]	PREDICTED: desiccation-related protein PCC27-45 [Beta vulgaris subsp. vulgaris]	731311491	2	1560.86	15	254.9	280.1	2.9	108.2	178.8	54.9	29.8	44.1	23.5	22.8	7.49176e+06	16729373	106602	3.2848e+06	2.08147e+06	2.70054e+06	750525	1.56405e+06	1.02182e+06	957054	1.52252e+07	16729373	172403	6.45896e+06	1.06785e+07		3.28012e+06
FALSE		High	Unambiguous	MAGIGPMSQDWEPVVIRK	[-].MAGIGPMSQDWEPVVIRK.[K]	1xMet-loss+Acetyl [N-Term]	1xMet-loss+Acetyl [N-Term]	1.71111e-06	5.33751e-05	2.262	1	1	33	731365470	731365470 [1-18]	731365470 1xMet-loss+Acetyl [N-Term]	731365470 1xMet-loss+Acetyl [N-Term]	PREDICTED: multiprotein-bridging factor 1b [Beta vulgaris subsp. vulgaris]	731365470	1	1924.99	18	268.7	180.4		96.9	72.6	25.4	49.3	144.4	108.9	53.5	1.08453e+07	1.48012e+07		4.04123e+06	1.16059e+06	1.71668e+06	1.70547e+06	7.04099e+06	6.51274e+06	3.07754e+06	2.20405e+07	1.48012e+07		7.94634e+06	5.95414e+06		2.08511e+06
FALSE		High	Unambiguous	MAGIGPMSQDWEPVVIR	[-].MAGIGPMSQDWEPVVIR.[K]	1xMet-loss+Acetyl [N-Term]	1xMet-loss+Acetyl [N-Term]	4.07691e-06	5.33751e-05	2.075	1	1	16	731365470	731365470 [1-17]	731365470 1xMet-loss+Acetyl [N-Term]	731365470 1xMet-loss+Acetyl [N-Term]	PREDICTED: multiprotein-bridging factor 1b [Beta vulgaris subsp. vulgaris]	731365470	0	1796.9	17	181.1	302.3		49.9	13.6	41.6	43.4	207.7	130.9	29.4	4.17858e+06	1.41725e+07		1.18993e+06	124066	1.60641e+06	858273	5.78859e+06	4.47398e+06	968383	8.49197e+06	1.41725e+07		2.33978e+06	636494		1.95117e+06
FALSE		High	Unambiguous	MAGKGEGPAIGIDLGTTYSCVGVWQHDRVEIIANDQGNR	[-].MAGKGEGPAIGIDLGTTYSCVGVWQHDRVEIIANDQGNR.[T]	1xCarbamidomethyl [C20]; 1xMet-loss+Acetyl [N-Term]	1xCarbamidomethyl [C20]; 1xMet-loss+Acetyl [N-Term]	1.97406e-08	5.33751e-05	3.222	1	1	3	731318762	731318762 [1-39]	731318762 1xMet-loss+Acetyl [N-Term]	731318762 1xMet-loss+Acetyl [N-Term]	PREDICTED: LOW QUALITY PROTEIN: uncharacterized protein LOC104887018 [Beta vulgaris subsp. vulgaris]	731318762	2	4095.99	39	106.9		323.6					363.6	206		649910		2472854					2670872	1.85577e+06		1.32079e+06		3.99925e+06
FALSE		High	Unambiguous	MAGFLSENRPVQTLR	[R].MAGFLSENRPVQTLR.[S]			1.69283e-05	5.33751e-05	1.767	1	1	28	731358722	731358722 [181-195]			PREDICTED: 2-oxoglutarate dehydrogenase, mitochondrial [Beta vulgaris subsp. vulgaris]	731358722	0	1718.9	15	41.6	90	123.5	98.1	183.7	131.2	99.7	71.3	94.5	66.4	3.82558e+06	1.68287e+07	1.4274e+07	9.32465e+06	6.69461e+06	2.01868e+07	7.86477e+06	7.9264e+06	1.2874e+07	8.71611e+06	7.77457e+06	1.68287e+07	2.30848e+07	1.83352e+07	3.43451e+07		2.45192e+07
FALSE		High	Unambiguous	MAEVAAETKVQSK	[-].MAEVAAETKVQSK.[V]	1xMet-loss+Acetyl [N-Term]	1xMet-loss+Acetyl [N-Term]	4.05805e-06	5.33751e-05	2.076	1	1	9	731340596	731340596 [1-13]	731340596 1xMet-loss+Acetyl [N-Term]	731340596 1xMet-loss+Acetyl [N-Term]	PREDICTED: uncharacterized protein LOC104896434 isoform X1 [Beta vulgaris subsp. vulgaris]	731340596	1	1302.69	13	403.4	185.7	1.5	78.8	49.7	0.9	55	111.7	82.1	31.3	9.98424e+06	9.33929e+06	45243.5	2015483	487765	36477.8	1.16819e+06	3.33874e+06	3.01243e+06	1.10438e+06	2.02906e+07	9.33929e+06	73170.4	3.96308e+06	2.50237e+06		44306.6
FALSE		High	Unambiguous	MAGEEDAGEFYLR	[-].MAGEEDAGEFYLR.[Y]	1xMet-loss+Acetyl [N-Term]	1xMet-loss+Acetyl [N-Term]	2.11917e-05	5.33751e-05	1.718	1	1	8	731341461	731341461 [1-13]	731341461 1xMet-loss+Acetyl [N-Term]	731341461 1xMet-loss+Acetyl [N-Term]	PREDICTED: protein mago nashi homolog [Beta vulgaris subsp. vulgaris]	731341461	0	1398.62	13	242.5	325.7	8.9	10.9	87.9	30.7	67	91.7	30.4	104.3	2750151	7.50828e+06	126458	127470	395156	582718	651527	1.25702e+06	510856	1.68764e+06	5.58903e+06	7.50828e+06	204516	250646	2.02726e+06		707779
FALSE		High	Unambiguous	MAGAAPEGSQYDAR	[-].MAGAAPEGSQYDAR.[Q]	1xMet-loss+Acetyl [N-Term]	1xMet-loss+Acetyl [N-Term]	8.71536e-06	5.33751e-05	1.911	1	1	20	731354626	731354626 [1-14]	731354626 1xMet-loss+Acetyl [N-Term]	731354626 1xMet-loss+Acetyl [N-Term]	PREDICTED: eukaryotic initiation factor 4A-9 [Beta vulgaris subsp. vulgaris]	731354626	0	1334.6	14	115.6	96.5	1.8	29.2	35.6	130.4	155.8	99.1	128.8	207.1	1.05588e+07	1.79201e+07	208892	2.75364e+06	1.28958e+06	1.99391e+07	1.22099e+07	1.09343e+07	1.74376e+07	26988207	2.14582e+07	1.79201e+07	337832	5.41453e+06	6.61587e+06		2.42184e+07
FALSE		High	Unambiguous	MAGAAGGFVTR	[-].MAGAAGGFVTR.[A]	1xMet-loss+Acetyl [N-Term]	1xMet-loss+Acetyl [N-Term]	4.53352e-05	5.33751e-05	1.55	1	1	5	731357174	731357174 [1-11]	731357174 1xMet-loss+Acetyl [N-Term]	731357174 1xMet-loss+Acetyl [N-Term]	PREDICTED: brefeldin A-inhibited guanine nucleotide-exchange protein 5 [Beta vulgaris subsp. vulgaris]	731357174	0	948.49	11	80.2	197.8	33.6	57.6	26.5	125.3	173.8	119	149.3	37	881838	4422203	463747	654497	115325	2.3064e+06	1.63899e+06	1.58057e+06	2.43281e+06	581194	1.79213e+06	4422203	750000	1.28695e+06	591649		2.80139e+06
FALSE		High	Unambiguous	MAFTGDVLLIR	[R].MAFTGDVLLIR.[G]			1.03405e-05	5.33751e-05	1.874	1	2	26	731365484	731365484 [185-195]			PREDICTED: persulfide dioxygenase ETHE1 homolog, mitochondrial isoform X1 [Beta vulgaris subsp. vulgaris]	731365484; 731365486	0	1235.68	11	43.9	198	13.4	190.9	42.1	115.3	74.5	172.6	83.7	65.4	3.68625e+06	3.37775e+07	1.41787e+06	1.65577e+07	1.40107e+06	1.61985e+07	5.36527e+06	1.74986e+07	1.04103e+07	7.83568e+06	7.49142e+06	3.37775e+07	2.29307e+06	3.25577e+07	7.18785e+06		1.96749e+07
FALSE		High	Unambiguous	MAFPVTSDDSISFK	[K].MAFPVTSDDSISFK.[V]			2.69895e-05	5.33751e-05	1.665	1	1	3	731314489	731314489 [83-96]			PREDICTED: outer envelope pore protein 21B, chloroplastic [Beta vulgaris subsp. vulgaris]	731314489	0	1544.73	14	156.4	217.1		15.2	49.2	57.8	32.2	23.8	323.5	124.8	1.04723e+06	2.95413e+06		105258	130545	647301	184988	192243	3.20956e+06	1.19185e+06	2.12825e+06	2.95413e+06		206970	669731		786223
FALSE		High	Unambiguous	MAFMAVLESDLR	[-].MAFMAVLESDLR.[A]	1xMet-loss+Acetyl [N-Term]	1xMet-loss+Acetyl [N-Term]	8.67635e-05	5.33751e-05	1.401	1	2	5	731328160	731328160 [1-12]	731328160 1xMet-loss+Acetyl [N-Term]	731328160 1xMet-loss+Acetyl [N-Term]	PREDICTED: protein MON2 homolog isoform X1 [Beta vulgaris subsp. vulgaris]	731328162; 731328160	0	1293.65	12	18.7	191.7	315.8	90	78.7	212.5	51.2	22.8		18.6	277123	5.77729e+06	5.88475e+06	1.37999e+06	462409	5271653	650835	408267		393502	563186	5.77729e+06	9.51717e+06	2.71349e+06	2.37228e+06		6.40304e+06
FALSE		High	Unambiguous	MAFIFDMENIYSHDIPTTLHR	[R].MAFIFDMENIYSHDIPTTLHR.[S]			2.42416e-06	5.33751e-05	2.187	1	1	2	731327326	731327326 [174-194]			PREDICTED: suppressor of mec-8 and unc-52 protein homolog 2 [Beta vulgaris subsp. vulgaris]	731327326	0	2551.21	21	488.6	19.9	23.7		109.4	27		46.1	285.3		1667426	138330	101760		147911	153980		189953	1.44262e+06		3.38865e+06	138330	164572		758822		187027
FALSE		High	Unambiguous	MAFDKINVTNPIVEMDGDEMTR	[-].MAFDKINVTNPIVEMDGDEMTR.[V]	1xMet-loss [N-Term]	1xMet-loss [N-Term]	6.51122e-06	5.33751e-05	1.974	1	1	3	731318867	731318867 [1-22]	731318867 1xMet-loss [N-Term]	731318867 1xMet-loss [N-Term]	PREDICTED: isocitrate dehydrogenase [NADP] [Beta vulgaris subsp. vulgaris]	731318867	1	2395.13	22		224.1		52.2	42.6	84.1	230.3	24.9	182.1	159.7		2.43086e+06		287932	90115.2	750614	1.05418e+06	160333	1.43951e+06	1.216e+06		2.43086e+06		566166	462315		911708
FALSE		High	Unambiguous	MAFASVAAVAPLVAGNSMK	[-].MAFASVAAVAPLVAGNSMK.[M]	1xMet-loss+Acetyl [N-Term]	1xMet-loss+Acetyl [N-Term]	1.24986e-07	5.33751e-05	2.825	1	1	29	731368266	731368266 [1-19]	731368266 1xMet-loss+Acetyl [N-Term]	731368266 1xMet-loss+Acetyl [N-Term]	PREDICTED: probable bifunctional methylthioribulose-1-phosphate dehydratase/enolase-phosphatase E1 1 [Beta vulgaris subsp. vulgaris]	731368266	0	1745.93	19	234.1	162	6.5	85.4	49.2	26.1	82.3	112.1	98.9	143.5	9.45317e+06	13292289	330591	3.56405e+06	787414	1.76043e+06	2.85055e+06	5.46643e+06	5.91528e+06	8.26218e+06	1.92113e+07	13292289	534651	7.00805e+06	4.03965e+06		2.13825e+06
FALSE		High	Unambiguous	LAFHDAGTYDAKAK	[R].LAFHDAGTYDAKAK.[T]	1xGG [K12]	1xGG [K12]	2.63823e-05	5.33751e-05	1.67	2	3	2	731337651; 731337647	731337651 [41-54]; 731337647 [39-52]			PREDICTED: L-ascorbate peroxidase 3, peroxisomal [Beta vulgaris subsp. vulgaris] PREDICTED: L-ascorbate peroxidase 3, peroxisomal [Beta vulgaris subsp. vulgaris]	731337651; 1108929373; 731337647	1	1621.8	14
FALSE		High	Unambiguous	MAGPSVPATPLLKDELDIVIPTIR	[-].MAGPSVPATPLLKDELDIVIPTIR.[N]	1xMet-loss+Acetyl [N-Term]	1xMet-loss+Acetyl [N-Term]	7.28906e-08	5.33751e-05	2.941	1	1	60	731366792	731366792 [1-24]	731366792 1xMet-loss+Acetyl [N-Term]	731366792 1xMet-loss+Acetyl [N-Term]	PREDICTED: alpha-1,4-glucan-protein synthase [UDP-forming] 2 [Beta vulgaris subsp. vulgaris]	731366792	1	2457.4	24	303.1	210	89.6	51.7	19.8	41.6	56.9	85.9	70.5	70.8	191989864	2.70359e+08	7.13582e+07	3.38826e+07	4.95943e+06	4.40849e+07	3.09324e+07	6.5779e+07	6.62092e+07	6.39696e+07	3.90174e+08	2.70359e+08	1.15405e+08	6.6624e+07	2.54432e+07		5.35463e+07
FALSE		High	Unambiguous	MAEEEVVTVTPQAPIDHNHKR	[-].MAEEEVVTVTPQAPIDHNHKR.[K]	1xMet-loss+Acetyl [N-Term]	1xMet-loss+Acetyl [N-Term]	1.08212e-07	5.33751e-05	2.856	1	1	11	731353535	731353535 [1-21]	731353535 1xMet-loss+Acetyl [N-Term]	731353535 1xMet-loss+Acetyl [N-Term]	PREDICTED: far upstream element-binding protein 1-like [Beta vulgaris subsp. vulgaris]	731353535	1	2312.16	21	288.6	74.9	80.3	166.3	166.4	25.7	8.7	112	31	46.1	1.46968e+07	7.75262e+06	5.13755e+06	8.75407e+06	3.35752e+06	2.19073e+06	378409	6.89327e+06	2.34212e+06	3.34842e+06	2.98677e+07	7.75262e+06	8.30874e+06	1.72133e+07	1.7225e+07		2.66089e+06
FALSE		High	Unambiguous	MAEDAVLGYLEKNEEIPDSGSFAAQFNIDHEDIVNVTK	[-].MAEDAVLGYLEKNEEIPDSGSFAAQFNIDHEDIVNVTK.[S]	1xMet-loss+Acetyl [N-Term]	1xMet-loss+Acetyl [N-Term]	1.11958e-08	5.33751e-05	3.344	1	1	6	731321000	731321000 [1-38]	731321000 1xMet-loss+Acetyl [N-Term]	731321000 1xMet-loss+Acetyl [N-Term]	PREDICTED: phenylalanine--tRNA ligase alpha subunit, cytoplasmic [Beta vulgaris subsp. vulgaris]	731321000	1	4119.97	38	344.4	370.9		23.3			41.2	152.9		67.4	3.73648e+06	8.17662e+06		261329			383019	2.00329e+06		1042788	7.59351e+06	8.17662e+06		513856
FALSE		High	Unambiguous	MADEAPKSQHEHEAASNSDLMASAK	[-].MADEAPKSQHEHEAASNSDLMASAK.[T]	1xMet-loss+Acetyl [N-Term]	1xMet-loss+Acetyl [N-Term]	7.44816e-07	5.33751e-05	2.441	1	1	6	1108938053	1108938053 [1-25]	1108938053 1xMet-loss+Acetyl [N-Term]	1108938053 1xMet-loss+Acetyl [N-Term]	PREDICTED: LOW QUALITY PROTEIN: nodulin-related protein 1-like [Beta vulgaris subsp. vulgaris]	1108938053	1	2566.15	25							48.4	450.5	423	78.2							273348	3.58692e+06	4.13078e+06	735317
FALSE		High	Unambiguous	MADDFSLDLEELRHLHTIAK	[-].MADDFSLDLEELRHLHTIAK.[R]	1xMet-loss+Acetyl [N-Term]	1xMet-loss+Acetyl [N-Term]	5.41412e-05	5.33751e-05	1.51	1	1	5	731373698	731373698 [1-20]	731373698 1xMet-loss+Acetyl [N-Term]	731373698 1xMet-loss+Acetyl [N-Term]	PREDICTED: calcyclin-binding protein [Beta vulgaris subsp. vulgaris]	731373698	1	2265.15	20	265.3	112.7		123	75.2	6.2	99.9	80	108	129.7	9519032	8.21821e+06		4.55905e+06	1.06886e+06	371987	3.07479e+06	3.46573e+06	5.7388e+06	6.63488e+06	1.93452e+07	8.21821e+06		8.96455e+06	5.48356e+06		451822
FALSE		High	Unambiguous	MADDFSLDLEELR	[-].MADDFSLDLEELR.[H]	1xMet-loss+Acetyl [N-Term]	1xMet-loss+Acetyl [N-Term]	6.09623e-05	5.33751e-05	1.483	1	1	3	731373698	731373698 [1-13]	731373698 1xMet-loss+Acetyl [N-Term]	731373698 1xMet-loss+Acetyl [N-Term]	PREDICTED: calcyclin-binding protein [Beta vulgaris subsp. vulgaris]	731373698	0	1464.69	13	205.9	469			29.4	40		189		66.7	1.81198e+06	8.3863e+06			102552	589621		2.00847e+06		836619	3.68241e+06	8.3863e+06			526117		716164
FALSE		High	Unambiguous	MADALVIAHVGGASLWESTRDQYLK	[K].MADALVIAHVGGASLWESTRDQYLK.[M]			2.77357e-06	5.33751e-05	2.158	1	2	3	731316229	731316229 [585-609]			PREDICTED: protein transport protein SEC31 homolog B isoform X2 [Beta vulgaris subsp. vulgaris]	731316229; 1108879431	1	2731.39	25		10.1		53.4	3.7	15.3		655.2	160.1	102.2		181050		485633	12923.6	225352		6.97088e+06	2.08906e+06	1.28337e+06		181050		954908	66301.4		273716
FALSE		High	Unambiguous	MADALVIAHVGGASLWESTR	[K].MADALVIAHVGGASLWESTR.[D]			1.82183e-05	5.33751e-05	1.751	1	2	3	731316229	731316229 [585-604]			PREDICTED: protein transport protein SEC31 homolog B isoform X2 [Beta vulgaris subsp. vulgaris]	731316229; 1108879431	0	2084.06	20				239.1	80.2		56	287.8	250.1	86.8				804231	103392		156190	1.13152e+06	1.2058e+06	402755				1.58137e+06	530430
FALSE		High	Unambiguous	MADAEEIQPLVCDNGTGMVKAGFAGDDAPRAVFPSIVGRPR	[-].MADAEEIQPLVCDNGTGMVKAGFAGDDAPRAVFPSIVGRPR.[H]	1xCarbamidomethyl [C12]; 1xMet-loss+Acetyl [N-Term]	1xCarbamidomethyl [C12]; 1xMet-loss+Acetyl [N-Term]	6.88329e-06	5.33751e-05	1.962	1	1	5	731311848	731311848 [1-41]	731311848 1xMet-loss+Acetyl [N-Term]	731311848 1xMet-loss+Acetyl [N-Term]	PREDICTED: actin-7 [Beta vulgaris subsp. vulgaris]	731311848	2	4226.08	41				110.8	173.2		60.1	479.7	82.3	93.9				1.85556e+06	1.11182e+06		835225	9389126	1.97553e+06	2170543				3.64862e+06	5.70393e+06
FALSE		High	Unambiguous	MADAEEIQPLVCDNGTGMVKAGFAGDDAPR	[-].MADAEEIQPLVCDNGTGMVKAGFAGDDAPR.[A]	1xCarbamidomethyl [C12]; 1xMet-loss+Acetyl [N-Term]	1xCarbamidomethyl [C12]; 1xMet-loss+Acetyl [N-Term]	2.20915e-06	5.33751e-05	2.207	1	1	4	731311848	731311848 [1-30]	731311848 1xMet-loss+Acetyl [N-Term]	731311848 1xMet-loss+Acetyl [N-Term]	PREDICTED: actin-7 [Beta vulgaris subsp. vulgaris]	731311848	1	3046.39	30				108.8	305.8	26.3	31.3	399.6	128.2					937373	1.00986e+06	367460	224118	4024676	1.58317e+06					1.84317e+06	5.18084e+06		446323
FALSE		High	Unambiguous	MADAEEIQPLVCDNGTGMVK	[-].MADAEEIQPLVCDNGTGMVK.[A]	1xCarbamidomethyl [C12]; 1xMet-loss+Acetyl [N-Term]	1xCarbamidomethyl [C12]; 1xMet-loss+Acetyl [N-Term]	3.97687e-07	5.33751e-05	2.576	1	1	64	731311848	731311848 [1-20]	731311848 1xMet-loss+Acetyl [N-Term]	731311848 1xMet-loss+Acetyl [N-Term]	PREDICTED: actin-7 [Beta vulgaris subsp. vulgaris]	731311848	0	2088.96	20	53.5	193.1	2.5	77.1	95.8	50.9	111.5	162.2	180	73.3	9.70237e+06	7.11015e+07	577089	1.44287e+07	6.87766e+06	1.5442e+07	1.73306e+07	3.54918e+07	4.83274e+07	1.89373e+07	1.97178e+07	7.11015e+07	933302	2.83713e+07	3.52842e+07		1.87561e+07
FALSE		High	Unambiguous	MADEAQYESHKR	[-].MADEAQYESHKR.[K]	1xMet-loss+Acetyl [N-Term]	1xMet-loss+Acetyl [N-Term]	3.68131e-06	5.33751e-05	2.097	1	1	5	731317544	731317544 [1-12]	731317544 1xMet-loss+Acetyl [N-Term]	731317544 1xMet-loss+Acetyl [N-Term]	PREDICTED: far upstream element-binding protein 1 [Beta vulgaris subsp. vulgaris]	731317544	1	1375.62	12	255	52.3	1.3	41.2		280.2	3.2	114.5	245.6	6.6	1.49976e+06	624612	9697.12	250586		2.75778e+06	16302.3	813670	2.14059e+06	55207.9	3.0479e+06	624612	15682.7	492731			3.34964e+06
FALSE		High	Unambiguous	MADAEDIQPLVCDNGTGMVK	[-].MADAEDIQPLVCDNGTGMVK.[A]	1xCarbamidomethyl [C12]; 1xMet-loss+Acetyl [N-Term]	1xCarbamidomethyl [C12]; 1xMet-loss+Acetyl [N-Term]	1.76424e-05	5.33751e-05	1.758	1	1	9	731311844	731311844 [1-20]	731311844 1xMet-loss+Acetyl [N-Term]	731311844 1xMet-loss+Acetyl [N-Term]	PREDICTED: actin-7 [Beta vulgaris subsp. vulgaris]	731311844	0	2074.94	20		365.5		29.9	47.8	44	112.5	231.9	168.3			5214398		217062	133004	516949	677265	1.96697e+06	1.75064e+06			5214398		426813	682347		627895
FALSE		High	Unambiguous	MAAVEQITEGVNNLSVIDSGKKNR	[-].MAAVEQITEGVNNLSVIDSGKKNR.[I]	1xMet-loss+Acetyl [N-Term]	1xMet-loss+Acetyl [N-Term]	4.95364e-06	5.33751e-05	2.033	1	1	5	731353351	731353351 [1-24]	731353351 1xMet-loss+Acetyl [N-Term]	731353351 1xMet-loss+Acetyl [N-Term]	PREDICTED: uncharacterized protein At2g34160 [Beta vulgaris subsp. vulgaris]	731353351	2	2484.31	24	334.4	60.6		66.8	64.3		29.5	221.9	131	91.4	3.83344e+06	1411146		791966	292181		289553	3.07341e+06	2.22512e+06	1.49465e+06	7.79056e+06	1411146		1.55726e+06	1.49897e+06
FALSE		High	Unambiguous	MAAVEQITEGVNNLSVIDSGKK	[-].MAAVEQITEGVNNLSVIDSGKK.[N]	1xMet-loss+Acetyl [N-Term]	1xMet-loss+Acetyl [N-Term]	1.86695e-08	5.33751e-05	3.234	1	1	43	731353351	731353351 [1-22]	731353351 1xMet-loss+Acetyl [N-Term]	731353351 1xMet-loss+Acetyl [N-Term]	PREDICTED: uncharacterized protein At2g34160 [Beta vulgaris subsp. vulgaris]	731353351	1	2214.16	22	265.6	202.2		36.2	43.7	40.5	46	150	119.3	96.5	2.43353e+07	3.76425e+07		3.42416e+06	1.58721e+06	6.21521e+06	3.6132e+06	1.65996e+07	1.61914e+07	1.2604e+07	4.94557e+07	3.76425e+07		6.73297e+06	8.14283e+06		7.5491e+06
FALSE		High	Unambiguous	MAAVEQITEGVNNLSVIDSGK	[-].MAAVEQITEGVNNLSVIDSGK.[K]	1xMet-loss+Acetyl [N-Term]	1xMet-loss+Acetyl [N-Term]	2.42416e-06	5.33751e-05	2.187	1	1	5	731353351	731353351 [1-21]	731353351 1xMet-loss+Acetyl [N-Term]	731353351 1xMet-loss+Acetyl [N-Term]	PREDICTED: uncharacterized protein At2g34160 [Beta vulgaris subsp. vulgaris]	731353351	0	2086.07	21	56.4	484.5	13.9	69.8	7.7	25.3	19.9	184.5	41.2	96.7	228167	3.98215e+06	70804.6	291616	12356.5	171431	69131.6	901250	246893	557869	463694	3.98215e+06	114509	573410	63391.9		208223
FALSE		High	Unambiguous	MAAVAATADEKREK	[-].MAAVAATADEKREK.[M]	1xMet-loss+Acetyl [N-Term]	1xMet-loss+Acetyl [N-Term]	8.14201e-05	5.33751e-05	1.416	1	1	1	731358712	731358712 [1-14]	731358712 1xMet-loss+Acetyl [N-Term]	731358712 1xMet-loss+Acetyl [N-Term]	PREDICTED: guanine nucleotide-binding protein subunit beta-2 [Beta vulgaris subsp. vulgaris]	731358712	2	1401.73	14		433.5		102.5				399.2		64.8		1.91338e+06		230009				1.04741e+06		200693		1.91338e+06		452270
FALSE		High	Unambiguous	MAATTTQAYLESKPVQESK	[K].MAATTTQAYLESKPVQESK.[A]			3.98304e-08	5.33751e-05	3.071	1	1	10	731368266	731368266 [20-38]			PREDICTED: probable bifunctional methylthioribulose-1-phosphate dehydratase/enolase-phosphatase E1 1 [Beta vulgaris subsp. vulgaris]	731368266	0	2083.04	19	256.5	216.8		77.8	58.9	57	74	95.5	104.7	58.7	7.16074e+06	12300887		2.24553e+06	651298	2661992	1.77067e+06	3.22143e+06	4.33025e+06	2.33562e+06	1.45525e+07	12300887		4.41542e+06	3.34133e+06		3.2333e+06
FALSE		High	Unambiguous	MAATTGAAAVMNSTTVVEWHQRPPNPK	[-].MAATTGAAAVMNSTTVVEWHQRPPNPK.[N]	1xMet-loss+Acetyl [N-Term]	1xMet-loss+Acetyl [N-Term]	5.35408e-10	5.33751e-05	3.998	1	1	8	731319908	731319908 [1-27]	731319908 1xMet-loss+Acetyl [N-Term]	731319908 1xMet-loss+Acetyl [N-Term]	PREDICTED: peptidyl-prolyl cis-trans isomerase CYP22 [Beta vulgaris subsp. vulgaris]	731319908	0	2776.38	27	63.3	75.4		134.1	25.6	63.5	67.6	359	105.8	105.7	1.37064e+06	3.31793e+06		3.00041e+06	219817	2.29974e+06	1.2542e+06	9.38694e+06	3.39229e+06	3.26455e+06	2.7855e+06	3.31793e+06		5.89976e+06	1.12772e+06		2.79331e+06
FALSE		High	Unambiguous	MAATSSENKASLIDGK	[-].MAATSSENKASLIDGK.[A]	1xMet-loss+Acetyl [N-Term]	1xMet-loss+Acetyl [N-Term]	1.28521e-07	5.33751e-05	2.819	1	1	10	731362743	731362743 [1-16]	731362743 1xMet-loss+Acetyl [N-Term]	731362743 1xMet-loss+Acetyl [N-Term]	PREDICTED: bifunctional protein FolD 2 [Beta vulgaris subsp. vulgaris]	731362743	1	1533.78	16	298.3	126		50.1	66.8	77.1	117.6	65.9	106.3	92	1.51681e+07	1.30187e+07		2.63325e+06	1.34471e+06	6.56203e+06	5.12851e+06	4.04594e+06	8.00604e+06	6.67588e+06	3.08255e+07	1.30187e+07		5.1778e+06	6.89874e+06		7.97034e+06
FALSE		High	Unambiguous	MAATSPSMESLILQLHEISAVKFGNFK	[-].MAATSPSMESLILQLHEISAVKFGNFK.[L]	1xMet-loss+Acetyl [N-Term]	1xMet-loss+Acetyl [N-Term]	6.63114e-07	5.33751e-05	2.466	1	1	1	731319789	731319789 [1-27]	731319789 1xMet-loss+Acetyl [N-Term]	731319789 1xMet-loss+Acetyl [N-Term]	PREDICTED: uridine 5'-monophosphate synthase [Beta vulgaris subsp. vulgaris]	731319789	1	2860.49	27	1000										2.24564e+06										4.56373e+06
FALSE		High	Unambiguous	MADAAAATTNTTTTSASAVVDDAKDIEKLYEYGER	[-].MADAAAATTNTTTTSASAVVDDAKDIEKLYEYGER.[L]	1xMet-loss+Acetyl [N-Term]	1xMet-loss+Acetyl [N-Term]	1.65636e-06	5.33751e-05	2.269	1	1	6	731350137	731350137 [1-35]	731350137 1xMet-loss+Acetyl [N-Term]	731350137 1xMet-loss+Acetyl [N-Term]	PREDICTED: apoptosis inhibitor 5-like protein API5 [Beta vulgaris subsp. vulgaris]	731350137	2	3590.7	35		317.6	10.6	188.9	93.6	6	36.5	139.3	120	87.6		7.13279e+06	147244	2158350	409715	110162	346184	1.85941e+06	1.96511e+06	1.38074e+06		7.13279e+06	238131	4.244e+06	2.10195e+06		133804
FALSE		High	Unambiguous	MAEEEEYEKIVLVENR	[R].MAEEEEYEKIVLVENR.[N]			2.48651e-05	5.33751e-05	1.683	1	1	6	731357582	731357582 [132-147]			PREDICTED: coiled-coil domain-containing protein 124 [Beta vulgaris subsp. vulgaris]	731357582	1	1980.96	16	31.5	212.4		94.9	259	62.6	72.1	160.8	28.5	78	367432	5.03285e+06		1.14371e+06	1.19624e+06	1.22154e+06	721151	2.26414e+06	492592	1.29744e+06	746718	5.03285e+06		2.24889e+06	6.13704e+06		1.48371e+06
FALSE		High	Unambiguous	MADEGGGGNLKQQLAK	[-].MADEGGGGNLKQQLAK.[V]	1xMet-loss+Acetyl [N-Term]	1xMet-loss+Acetyl [N-Term]	4.05151e-07	5.33751e-05	2.572	1	1	10	731354004	731354004 [1-16]	731354004 1xMet-loss+Acetyl [N-Term]	731354004 1xMet-loss+Acetyl [N-Term]	PREDICTED: arginine--tRNA ligase, chloroplastic/mitochondrial isoform X2 [Beta vulgaris subsp. vulgaris]	731354004	1	1527.78	16	69.5	82.5			307.1	35	85.6	56.5	58.9	304.9	3.08165e+06	7434525			5.39608e+06	2.59901e+06	3.25724e+06	3029697	3.87278e+06	1.92965e+07	6.26271e+06	7434525			2.76833e+07		3.1568e+06
FALSE		High	Unambiguous	MADERNNYEAPATVESTDRGLFDFMK	[-].MADERNNYEAPATVESTDRGLFDFMK.[K]	1xMet-loss+Acetyl [N-Term]	1xMet-loss+Acetyl [N-Term]	4.00653e-12	5.33751e-05	5.051	1	1	80	731375198	731375198 [1-26]	731375198 1xMet-loss+Acetyl [N-Term]	731375198 1xMet-loss+Acetyl [N-Term]	PREDICTED: phosphoprotein ECPP44 [Beta vulgaris subsp. vulgaris]	731375198	2	2918.33	26	172.6	144.7	24	174.9	243.7	25.9	41.7	68.3	58.6	45.5	1.26953e+08	2.16293e+08	2.22063e+07	1.32925e+08	7.09968e+07	3.19218e+07	2.63188e+07	6.06969e+07	6.38394e+07	4.77351e+07	2.58002e+08	2.16293e+08	3.59133e+07	2.61373e+08	3.64232e+08		3.87727e+07
FALSE		High	Unambiguous	MAEAETFAFQAEINQLLSLIINTFYSNKEIFLR	[-].MAEAETFAFQAEINQLLSLIINTFYSNKEIFLR.[E]	1xMet-loss+Acetyl [N-Term]	1xMet-loss+Acetyl [N-Term]	5.88438e-11	5.33751e-05	4.473	1	1	30	731330156	731330156 [1-33]	731330156 1xMet-loss+Acetyl [N-Term]	731330156 1xMet-loss+Acetyl [N-Term]	PREDICTED: heat shock cognate protein 80 [Beta vulgaris subsp. vulgaris]	731330156	1	3775.96	33	18.6	161.4	36.6	58.5	215.9	63.2	113.8	147.4	95.1	89.4	2.74216e+06	4.84397e+07	6.79748e+06	8930267	1.26269e+07	1.56168e+07	1.4414e+07	26297863	20807409	1.88395e+07	5.57279e+06	4.84397e+07	1.09933e+07	1.75597e+07	6.47794e+07		1.89684e+07
FALSE		High	Unambiguous	MADYHFVYKDVEGK	[-].MADYHFVYKDVEGK.[S]	1xMet-loss+Acetyl [N-Term]	1xMet-loss+Acetyl [N-Term]	4.19198e-06	5.33751e-05	2.069	1	2	5	731374482	731374482 [1-14]	731374482 1xMet-loss+Acetyl [N-Term]	731374482 1xMet-loss+Acetyl [N-Term]	PREDICTED: phosducin-like protein 3 [Beta vulgaris subsp. vulgaris]	731374482; 731355690	1	1612.76	14		141.8	145.4	178.6	48.6	23.5	45.9	224.5	68.2	123.5		4.20195e+06	2.66421e+06	2.69116e+06	280544	572063	573546	3.9534e+06	1.47362e+06	2.56735e+06		4.20195e+06	4.30872e+06	5.29168e+06	1.43927e+06		694837
FALSE		High	Unambiguous	MADVKEEEQQIPAENLQSLSINDPSHSSPSAAAAVR	[-].MADVKEEEQQIPAENLQSLSINDPSHSSPSAAAAVR.[M]	1xMet-loss+Acetyl [N-Term]	1xMet-loss+Acetyl [N-Term]	9.22354e-10	5.33751e-05	3.881	1	1	14	731345970	731345970 [1-36]	731345970 1xMet-loss+Acetyl [N-Term]	731345970 1xMet-loss+Acetyl [N-Term]	PREDICTED: tyrosine--tRNA ligase 1, cytoplasmic [Beta vulgaris subsp. vulgaris]	731345970	1	3730.82	36	312	137.2	4	22.5	77.1	58	133.2	140	49.6	66.3	7.28928e+06	6.51717e+06	117840	542749	713585	2.26874e+06	2.66974e+06	3.95157e+06	1.71631e+06	2.2111e+06	1.48137e+07	6.51717e+06	190578	1.06722e+06	3.66088e+06		2.75565e+06
FALSE		High	Unambiguous	MADVEGEVAAAAGAAPKKR	[-].MADVEGEVAAAAGAAPKKR.[T]	1xMet-loss+Acetyl [N-Term]	1xMet-loss+Acetyl [N-Term]	1.42361e-07	5.33751e-05	2.797	1	1	14	731336303	731336303 [1-19]	731336303 1xMet-loss+Acetyl [N-Term]	731336303 1xMet-loss+Acetyl [N-Term]	PREDICTED: 40S ribosomal protein S15 [Beta vulgaris subsp. vulgaris]	731336303	2	1752.92	19	270.7	45.8	22.5	96.2	71	10.4	70.6	200.9	104.9	106.9	9.55228e+06	3.28836e+06	997453	3.51057e+06	992086	612549	2.13772e+06	8.56519e+06	5.48707e+06	5.38184e+06	1.94127e+07	3.28836e+06	1.61314e+06	6.90289e+06	5.08967e+06		744012
FALSE		High	Unambiguous	MADVEGEVAAAAGAAPK	[-].MADVEGEVAAAAGAAPK.[K]	1xMet-loss+Acetyl [N-Term]	1xMet-loss+Acetyl [N-Term]	3.89727e-09	5.33751e-05	3.571	1	1	67	731336303	731336303 [1-17]	731336303 1xMet-loss+Acetyl [N-Term]	731336303 1xMet-loss+Acetyl [N-Term]	PREDICTED: 40S ribosomal protein S15 [Beta vulgaris subsp. vulgaris]	731336303	0	1468.73	17	231	212.3	14.5	55.6	56.6	69.8	70.6	108.8	93.9	86.9	1.1553e+08	2.1585e+08	9.12243e+06	28767703	1.12055e+07	5.8414e+07	3.02926e+07	6.57286e+07	6.95835e+07	6.19824e+07	2.34787e+08	2.1585e+08	1.47533e+07	5.65664e+07	5.74874e+07		7.09506e+07
FALSE		High	Unambiguous	MADSISSIPTKPTITHVLFDMDGLLLDTEKFYTEVQEQILAR	[-].MADSISSIPTKPTITHVLFDMDGLLLDTEKFYTEVQEQILAR.[Y]	1xMet-loss+Acetyl [N-Term]	1xMet-loss+Acetyl [N-Term]	1.39707e-10	5.33751e-05	4.287	1	1	9	731354258	731354258 [1-42]	731354258 1xMet-loss+Acetyl [N-Term]	731354258 1xMet-loss+Acetyl [N-Term]	PREDICTED: (DL)-glycerol-3-phosphatase 2 [Beta vulgaris subsp. vulgaris]	731354258	1	4677.4	42		115.3	213.5	109.6	103.1	93.5	100.1	24.7	97.6	142.6		6.15468e+06	7.04269e+06	2.97387e+06	1.07199e+06	4.10725e+06	2.25488e+06	783869	3.79557e+06	5.34092e+06		6.15468e+06	1.13898e+07	5.84757e+06	5.49961e+06		4.98873e+06
FALSE		High	Unambiguous	MADSLANLMNNEDVLR	[-].MADSLANLMNNEDVLR.[K]	1xMet-loss+Acetyl [N-Term]	1xMet-loss+Acetyl [N-Term]	2.43045e-05	5.33751e-05	1.688	1	1	2	731347961	731347961 [1-16]	731347961 1xMet-loss+Acetyl [N-Term]	731347961 1xMet-loss+Acetyl [N-Term]	PREDICTED: 17.4 kDa class III heat shock protein [Beta vulgaris subsp. vulgaris]	731347961	0	1716.82	16	133.3	601.3				23.9		241.4			396039	3.62987e+06				119005		866429			804856	3.62987e+06					144545
FALSE		High	Unambiguous	MADQLSDDQISEFKEAFSLFDKDGDGCITTK	[-].MADQLSDDQISEFKEAFSLFDKDGDGCITTK.[E]	1xCarbamidomethyl [C27]; 1xMet-loss+Acetyl [N-Term]	1xCarbamidomethyl [C27]; 1xMet-loss+Acetyl [N-Term]	1.81783e-12	5.33751e-05	5.221	1	1	60	1108975963	1108975963 [1-31]	1108975963 1xMet-loss+Acetyl [N-Term]	1108975963 1xMet-loss+Acetyl [N-Term]	PREDICTED: calmodulin-7-like [Beta vulgaris subsp. vulgaris]	1108975963	2	3422.56	31	8.9	186.2	153	133.5	91.3	87.5	83.6	91.9	75.1	89.2	6.73278e+06	2.85545e+08	1.45022e+08	1.04061e+08	2.7277e+07	1.10397e+08	5.40684e+07	8.37171e+07	8.3901e+07	9.60277e+07	1.36828e+07	2.85545e+08	2.34538e+08	2.04617e+08	1.39938e+08		1.34089e+08
FALSE		High	Unambiguous	MADERNNYEAPATVESTDR	[-].MADERNNYEAPATVESTDR.[G]	1xMet-loss+Acetyl [N-Term]	1xMet-loss+Acetyl [N-Term]	3.8433e-09	5.33751e-05	3.574	1	1	41	731375198	731375198 [1-19]	731375198 1xMet-loss+Acetyl [N-Term]	731375198 1xMet-loss+Acetyl [N-Term]	PREDICTED: phosphoprotein ECPP44 [Beta vulgaris subsp. vulgaris]	731375198	1	2079.92	19	82.6	126.1	2.8	38	65.2	140.3	135.6	91.5	126.6	191.3	21318365	6.61266e+07	913601	1.0135e+07	6.66905e+06	6.06032e+07	3.00086e+07	2.85251e+07	4.84206e+07	7.04312e+07	4.33245e+07	6.61266e+07	1.47753e+06	1.99287e+07	3.4214e+07		7.36096e+07
FALSE		High	Unambiguous	MADQLSDDQISEFK	[-].MADQLSDDQISEFK.[E]	1xMet-loss+Acetyl [N-Term]	1xMet-loss+Acetyl [N-Term]	2.85029e-05	5.33751e-05	1.653	1	1	13	1108975963	1108975963 [1-14]	1108975963 1xMet-loss+Acetyl [N-Term]	1108975963 1xMet-loss+Acetyl [N-Term]	PREDICTED: calmodulin-7-like [Beta vulgaris subsp. vulgaris]	1108975963	0	1537.7	14	141.1	153.7	10.7	67	19.4	137.9	116.1	98.3	111.4	144.3	3.22029e+06	7.12709e+06	308019	1.58042e+06	175149	5.26265e+06	2.27172e+06	2.71003e+06	3.76537e+06	4.69747e+06	6.54447e+06	7.12709e+06	498147	3.10761e+06	898559		6.3921e+06
FALSE		High	Unambiguous	MADNGVEKQNTTENQPEQQQSKEIK	[-].MADNGVEKQNTTENQPEQQQSKEIK.[H]	1xMet-loss+Acetyl [N-Term]	1xMet-loss+Acetyl [N-Term]	3.35532e-05	5.33751e-05	1.617	1	1	3	731358219	731358219 [1-25]	731358219 1xMet-loss+Acetyl [N-Term]	731358219 1xMet-loss+Acetyl [N-Term]	PREDICTED: caffeoyl-CoA O-methyltransferase [Beta vulgaris subsp. vulgaris]	731358219	2	2785.32	25	664.5	260.3							48.3	26.8	3.22064e+06	2.56386e+06							346952	185480	6.54518e+06	2.56386e+06
FALSE		High	Unambiguous	MADNGVEKQNTTENQPEQQQSK	[-].MADNGVEKQNTTENQPEQQQSK.[E]	1xMet-loss+Acetyl [N-Term]	1xMet-loss+Acetyl [N-Term]	2.3865e-05	5.33751e-05	1.692	1	1	10	731358219	731358219 [1-22]	731358219 1xMet-loss+Acetyl [N-Term]	731358219 1xMet-loss+Acetyl [N-Term]	PREDICTED: caffeoyl-CoA O-methyltransferase [Beta vulgaris subsp. vulgaris]	731358219	1	2415.1	22	330.6	77.8	4			331.4	123.7	27.5	47.8	57.1	2.6948e+06	1.28806e+06	41388.6			4.5191e+06	864388	271187	577593	663949	5.47654e+06	1.28806e+06	66936.1				5.48898e+06
FALSE		High	Unambiguous	MADMIQNQLLQAR	[-].MADMIQNQLLQAR.[G]	1xMet-loss+Acetyl [N-Term]	1xMet-loss+Acetyl [N-Term]	2.92902e-05	5.33751e-05	1.647	1	1	4	731357068	731357068 [1-13]	731357068 1xMet-loss+Acetyl [N-Term]	731357068 1xMet-loss+Acetyl [N-Term]	PREDICTED: glucomannan 4-beta-mannosyltransferase 2-like [Beta vulgaris subsp. vulgaris]	731357068	0	1442.74	13	52.6	249.1	4.7	54	2.8	149.9	132.6	139.5	140	74.8	325904	3.1389e+06	36595.9	346191	6976.38	1.55552e+06	704925	1.04483e+06	1.28641e+06	661657	662322	3.1389e+06	59185	680720	35790.7		1.88936e+06
FALSE		High	Unambiguous	MADLSHEHGALTK	[-].MADLSHEHGALTK.[A]	1xMet-loss+Acetyl [N-Term]	1xMet-loss+Acetyl [N-Term]	8.14201e-05	5.33751e-05	1.416	1	1	2	731319755	731319755 [1-13]	731319755 1xMet-loss+Acetyl [N-Term]	731319755 1xMet-loss+Acetyl [N-Term]	PREDICTED: annexin D4 [Beta vulgaris subsp. vulgaris]	731319755	0	1320.65	13	255					14.1	156.2	291.8	105.4	177.6	820596					75699.9	431252	1.13445e+06	502429	815314	1.66767e+06						91946.3
FALSE		High	Unambiguous	MADHPAAASNPEDHHPKEVKSPNFIQR	[-].MADHPAAASNPEDHHPKEVKSPNFIQR.[A]	1xMet-loss+Acetyl [N-Term]	1xMet-loss+Acetyl [N-Term]	1.14759e-09	5.33751e-05	3.834	1	1	6	731348177	731348177 [1-27]	731348177 1xMet-loss+Acetyl [N-Term]	731348177 1xMet-loss+Acetyl [N-Term]	PREDICTED: uncharacterized protein LOC104899793 [Beta vulgaris subsp. vulgaris]	731348177	2	2934.42	27	304.7		12.6	593.6				43.5	17.4	28.2	5.9695e+06		309888	1.20192e+07				1.02996e+06	504980	789195	1.21316e+07		501170	2.36336e+07
FALSE		High	Unambiguous	MADHPAAASNPEDHHPKEVK	[-].MADHPAAASNPEDHHPKEVK.[S]	1xMet-loss+Acetyl [N-Term]	1xMet-loss+Acetyl [N-Term]	2.23468e-07	5.33751e-05	2.7	1	1	19	731348177	731348177 [1-20]	731348177 1xMet-loss+Acetyl [N-Term]	731348177 1xMet-loss+Acetyl [N-Term]	PREDICTED: uncharacterized protein LOC104899793 [Beta vulgaris subsp. vulgaris]	731348177	1	2091.98	20	259.8	259.3	38.3	18.5	9.6	61.5	55.8	120.4	142.2	34.6	1.02823e+07	2.08553e+07	1.90482e+06	755253	150597	4.0699e+06	1.89264e+06	5.7567e+06	8.33508e+06	1.95266e+06	2.08964e+07	2.08553e+07	3.08059e+06	1.48507e+06	772601		4.94336e+06
FALSE		High	Unambiguous	MADHPAAASNPEDHHPK	[-].MADHPAAASNPEDHHPK.[E]	1xMet-loss+Acetyl [N-Term]	1xMet-loss+Acetyl [N-Term]	4.07691e-06	5.33751e-05	2.075	1	1	2	731348177	731348177 [1-17]	731348177 1xMet-loss+Acetyl [N-Term]	731348177 1xMet-loss+Acetyl [N-Term]	PREDICTED: uncharacterized protein LOC104899793 [Beta vulgaris subsp. vulgaris]	731348177	0	1735.78	17	198.8					720.3	80.9				166618					1.00989e+06	58127.2				338612						1.22663e+06
FALSE		High	Unambiguous	MADERNNYEAPATVESTDRGLFDFMK	[-].MADERNNYEAPATVESTDRGLFDFMK.[K]	1xOxidation [M25]; 1xMet-loss+Acetyl [N-Term]	1xOxidation [M25]; 1xMet-loss+Acetyl [N-Term]	1.80519e-05	5.33751e-05	1.753	1	1	5	731375198	731375198 [1-26]	731375198 1xMet-loss+Acetyl [N-Term]	731375198 1xMet-loss+Acetyl [N-Term]	PREDICTED: phosphoprotein ECPP44 [Beta vulgaris subsp. vulgaris]	731375198	2	2934.32	26	64.9	202.5	7.1	15.9	465.8				24.4	219.4	700034	4.44135e+06	96699.4	177870	1.99153e+06				389716	3.37705e+06	1.42265e+06	4.44135e+06	156388	349750	1.02171e+07
FALSE		High	Unambiguous	MADQDEEELQMALK	[-].MADQDEEELQMALK.[M]	1xMet-loss+Acetyl [N-Term]	1xMet-loss+Acetyl [N-Term]	1.50906e-05	5.33751e-05	1.792	1	1	2	731313508	731313508 [1-14]	731313508 1xMet-loss+Acetyl [N-Term]	731313508 1xMet-loss+Acetyl [N-Term]	PREDICTED: ubiquitin carboxyl-terminal hydrolase FAM188A [Beta vulgaris subsp. vulgaris]	731313508	0	1561.71	14	581.4	263.7				154.9					2.859e+06	2.63571e+06				1.27452e+06					5.81024e+06	2.63571e+06					1.54806e+06
FALSE		High	Unambiguous	MAATSPSMESLILQLHEISAVK	[-].MAATSPSMESLILQLHEISAVK.[F]	1xMet-loss+Acetyl [N-Term]	1xMet-loss+Acetyl [N-Term]	1.89034e-07	5.33751e-05	2.736	1	1	20	731319789	731319789 [1-22]	731319789 1xMet-loss+Acetyl [N-Term]	731319789 1xMet-loss+Acetyl [N-Term]	PREDICTED: uridine 5'-monophosphate synthase [Beta vulgaris subsp. vulgaris]	731319789	0	2267.2	22	183.1	165.9		118.6	55.9	41.7	23.2	137.5	197.1	77	6.18057e+06	1.13796e+07		4.13732e+06	747598	2.35458e+06	672068	5.60872e+06	9.85783e+06	3.70982e+06	1.25605e+07	1.13796e+07		8.13528e+06	3.83538e+06		2.85991e+06
FALSE		High	Unambiguous	MAGTPQEDHSHIPLQPQTPQQAETTLKDHEETKK	[-].MAGTPQEDHSHIPLQPQTPQQAETTLKDHEETKK.[W]	1xMet-loss+Acetyl [N-Term]	1xMet-loss+Acetyl [N-Term]	2.30136e-08	5.33751e-05	3.189	1	1	2	731342992	731342992 [1-34]	731342992 1xMet-loss+Acetyl [N-Term]	731342992 1xMet-loss+Acetyl [N-Term]	PREDICTED: GEM-like protein 5 [Beta vulgaris subsp. vulgaris]	731342992	2	3761.84	34			513	289.1	197.9								23626370	10952101	2.87381e+06								3.821e+07	2.15353e+07	1.47434e+07
FALSE		High	Unambiguous	MAGYLAHWR	[R].MAGYLAHWR.[E]			3.38578e-05	5.33751e-05	1.615	1	1	40	731356945	731356945 [454-462]			PREDICTED: citrate synthase, glyoxysomal [Beta vulgaris subsp. vulgaris]	731356945	0	1104.54	9	14.9	35.5	26.4	40.8	37.8	211.5	155	142.8	192.8	142.4	825468	3.99451e+06	1.83813e+06	2.33161e+06	827442	1.95739e+07	7.35275e+06	9.54513e+06	1.58037e+07	1.1232e+07	1.67757e+06	3.99451e+06	2.97273e+06	4.58469e+06	4.245e+06		2.37747e+07
FALSE		High	Unambiguous	MANTEIQHLHEYELR	[-].MANTEIQHLHEYELR.[L]	1xMet-loss+Acetyl [N-Term]	1xMet-loss+Acetyl [N-Term]	4.57414e-05	5.33751e-05	1.548	1	1	1	731374123	731374123 [1-15]	731374123 1xMet-loss+Acetyl [N-Term]	731374123 1xMet-loss+Acetyl [N-Term]	PREDICTED: tetratricopeptide repeat protein 27 homolog [Beta vulgaris subsp. vulgaris]	731374123	0	1794.88	15	434.5		385.7	156.7				23			2.6565e+06		2.9637e+06	990424				170235			5.3987e+06		4.79308e+06	1.94749e+06
FALSE		High	Unambiguous	MANSDEPVVIGEVAGNVR	[-].MANSDEPVVIGEVAGNVR.[L]	1xMet-loss+Acetyl [N-Term]	1xMet-loss+Acetyl [N-Term]	5.61841e-08	5.33751e-05	2.997	1	1	10	731354986	731354986 [1-18]	731354986 1xMet-loss+Acetyl [N-Term]	731354986 1xMet-loss+Acetyl [N-Term]	PREDICTED: 3-hydroxyisobutyryl-CoA hydrolase-like protein 5 [Beta vulgaris subsp. vulgaris]	731354986	0	1767.89	18	198.6	166.4	2.4	67.2	46.7	60.2	135.7	108.7	71	143.2	3.20084e+06	5.4498e+06	49101.2	1.11919e+06	297972	1.62383e+06	1.8757e+06	2.11659e+06	1.69641e+06	3.29123e+06	6.50495e+06	5.4498e+06	79409.4	2.20069e+06	1.52867e+06		1.97233e+06
FALSE		High	Unambiguous	MANRVDHEYDYLFK	[-].MANRVDHEYDYLFK.[I]	1xMet-loss+Acetyl [N-Term]	1xMet-loss+Acetyl [N-Term]	8.32148e-06	5.33751e-05	1.921	1	1	15	733215608	733215608 [1-14]	733215608 1xMet-loss+Acetyl [N-Term]	733215608 1xMet-loss+Acetyl [N-Term]	ras-related protein Rab2BV [Beta vulgaris subsp. vulgaris]	733215608	1	1711.81	14	47.1	119.9		47.1	169.2	282	60.4	54.5	81.6	138.1	1310502	6.77805e+06		1.35429e+06	1.8639e+06	1.31244e+07	1.44051e+06	1.83226e+06	3.36262e+06	5.47689e+06	2.66328e+06	6.77805e+06		2.66296e+06	9.56229e+06		1.59411e+07
FALSE		High	Unambiguous	MANQKKLEGQVELNCSAK	[-].MANQKKLEGQVELNCSAK.[K]	1xCarbamidomethyl [C15]; 1xMet-loss+Acetyl [N-Term]	1xCarbamidomethyl [C15]; 1xMet-loss+Acetyl [N-Term]	3.01357e-08	5.33751e-05	3.131	1	1	6	731344151	731344151 [1-18]	731344151 1xMet-loss+Acetyl [N-Term]	731344151 1xMet-loss+Acetyl [N-Term]	PREDICTED: MLP-like protein 34 [Beta vulgaris subsp. vulgaris]	731344151	2	1959	18				60.2	53.1		133.8	499.8	124.4	128.6				647518	218694		1.19323e+06	6.28063e+06	1.91769e+06	1908653				1.27323e+06	1.12196e+06
FALSE		High	Unambiguous	MANPWWTGQVGLQGLESTSSGMK	[-].MANPWWTGQVGLQGLESTSSGMK.[V]	1xMet-loss+Acetyl [N-Term]	1xMet-loss+Acetyl [N-Term]	5.68298e-05	5.33751e-05	1.499	1	1	2	731365915	731365915 [1-23]	731365915 1xMet-loss+Acetyl [N-Term]	731365915 1xMet-loss+Acetyl [N-Term]	PREDICTED: AT-hook motif nuclear-localized protein 19 [Beta vulgaris subsp. vulgaris]	731365915	0	2376.13	23	921							79			1.03259e+06							106989			2.09849e+06
FALSE		High	Unambiguous	MANPIVQQILEK	[-].MANPIVQQILEK.[Q]	1xMet-loss+Acetyl [N-Term]	1xMet-loss+Acetyl [N-Term]	8.86112e-05	5.33751e-05	1.396	1	1	3	731360110	731360110 [1-12]	731360110 1xMet-loss+Acetyl [N-Term]	731360110 1xMet-loss+Acetyl [N-Term]	PREDICTED: thioredoxin domain-containing protein 9 homolog [Beta vulgaris subsp. vulgaris]	731360110	0	1294.74	12	38.9	390.3		99.1	24.8	137.1	75.9	157.5	40.5	35.8	221633	4.52228e+06		583921	55900.3	1.30805e+06	371296	1.08509e+06	342349	291436	450416	4.52228e+06		1.14817e+06	286783		1.58878e+06
FALSE		High	Unambiguous	MANPFGQVVDDDKLEEMPR	[-].MANPFGQVVDDDKLEEMPR.[Y]	1xMet-loss+Acetyl [N-Term]	1xMet-loss+Acetyl [N-Term]	1.18756e-07	5.33751e-05	2.836	1	1	29	731350091	731350091 [1-19]	731350091 1xMet-loss+Acetyl [N-Term]	731350091 1xMet-loss+Acetyl [N-Term]	PREDICTED: 23 kDa jasmonate-induced protein [Beta vulgaris subsp. vulgaris]	731350091	1	2101.99	19	238.3	250.2	10.6	45.3	87.7	37.6	51.1	99.1	100.5	79.5	1.83832e+07	3.92181e+07	1.02699e+06	3.6141e+06	2.67834e+06	4.84905e+06	3.38123e+06	9.23649e+06	1.14851e+07	8.74858e+06	3.73596e+07	3.92181e+07	1.66092e+06	7.10646e+06	1.37406e+07		5.88974e+06
FALSE		High	Unambiguous	MANLINFNLDPKPESR	[R].MANLINFNLDPKPESR.[E]			8.96051e-06	5.33751e-05	1.905	1	1	17	731326606	731326606 [354-369]			PREDICTED: eukaryotic translation initiation factor 3 subunit A [Beta vulgaris subsp. vulgaris]	731326606	0	1858.95	16	75.4	120.4	76.6	141.2	250.7	67.3	58.9	29.6	92.1	88	3.64133e+06	1.18131e+07	4.64824e+06	7.04672e+06	4.79588e+06	5.43678e+06	2.43775e+06	1.72646e+06	6.59215e+06	6.06222e+06	7.40013e+06	1.18131e+07	7.51741e+06	1.38561e+07	2.46041e+07		6.6036e+06
FALSE		High	Unambiguous	MANTTGLDEETASK	[-].MANTTGLDEETASK.[V]	1xMet-loss+Acetyl [N-Term]	1xMet-loss+Acetyl [N-Term]	3.9639e-05	5.33751e-05	1.58	1	1	7	731317156	731317156 [1-14]	731317156 1xMet-loss+Acetyl [N-Term]	731317156 1xMet-loss+Acetyl [N-Term]	PREDICTED: la protein 1 [Beta vulgaris subsp. vulgaris]	731317156	0	1378.63	14	166.6	272.8	2.6		27.3	134.4	96.6	64.2	139.6	95.8	1.77964e+06	5.9237e+06	34872.6		115720	2403266	885330	828734	2.21071e+06	1.46066e+06	3.61669e+06	5.9237e+06	56397.9		593673		2.91905e+06
FALSE		High	Unambiguous	MANIDIEGILKEQPNDGRIPK	[-].MANIDIEGILKEQPNDGRIPK.[T]	1xMet-loss+Acetyl [N-Term]	1xMet-loss+Acetyl [N-Term]	7.56523e-08	5.33751e-05	2.933	1	1	77	731317849	731317849 [1-21]	731317849 1xMet-loss+Acetyl [N-Term]	731317849 1xMet-loss+Acetyl [N-Term]	PREDICTED: pyruvate kinase, cytosolic isozyme [Beta vulgaris subsp. vulgaris]	731317849	2	2262.21	21	333	208.3	18.4	96	109.4	30.6	45.7	53.1	55.2	50.3	1.42001e+08	180521109	9.87909e+06	4.23078e+07	1.84726e+07	2.18004e+07	1.67066e+07	2.73577e+07	3.48824e+07	3.05614e+07	2.88583e+08	180521109	1.5977e+07	8.31906e+07	9.47691e+07		2.64792e+07
FALSE		High	Unambiguous	MANIALTGILEK	[-].MANIALTGILEK.[M]	1xMet-loss+Acetyl [N-Term]	1xMet-loss+Acetyl [N-Term]	3.63922e-05	5.33751e-05	1.599	1	1	14	731341867	731341867 [1-12]	731341867 1xMet-loss+Acetyl [N-Term]	731341867 1xMet-loss+Acetyl [N-Term]	PREDICTED: cullin-associated NEDD8-dissociated protein 1 [Beta vulgaris subsp. vulgaris]	731341867	0	1184.69	12	280.5	270.2	5.1	57.4	17.3	30.7	37.9	117	114.3	69.5	1.08153e+07	2.11719e+07	248948	2.28733e+06	264901	1.98231e+06	1.25266e+06	5.44724e+06	6.53138e+06	3.82035e+06	2.19796e+07	2.11719e+07	402613	4.49761e+06	1.35902e+06		2.40774e+06
FALSE		High	Unambiguous	MANKVYEEAIAGLTK	[-].MANKVYEEAIAGLTK.[L]	1xMet-loss+Acetyl [N-Term]	1xMet-loss+Acetyl [N-Term]	2.76745e-07	5.33751e-05	2.654	1	1	38	731342757	731342757 [1-15]	731342757 1xMet-loss+Acetyl [N-Term]	731342757 1xMet-loss+Acetyl [N-Term]	PREDICTED: carbonic anhydrase 2 isoform X2 [Beta vulgaris subsp. vulgaris]	731342757	1	1548.83	15	206.1	245.4	21.5	116.6	35.3	58.5	65.2	104.9	89.7	56.9	2.76738e+07	6.69584e+07	3.62114e+06	1.61834e+07	1.87544e+06	1.31374e+07	7.50567e+06	1.70101e+07	1.78538e+07	1.09045e+07	5.62405e+07	6.69584e+07	5.85632e+06	3.18217e+07	9.62152e+06		1.59569e+07
FALSE		High	Unambiguous	MANEVVLLDFWPSPFGMR	[-].MANEVVLLDFWPSPFGMR.[V]	1xMet-loss+Acetyl [N-Term]	1xMet-loss+Acetyl [N-Term]	4.94788e-07	5.33751e-05	2.529	2	2	27	731366007; 731365988	731366007 [1-18]; 731365988 [1-18]	731366007 1xMet-loss+Acetyl [N-Term]; 731365988 1xMet-loss+Acetyl [N-Term]	731366007 1xMet-loss+Acetyl [N-Term]; 731365988 1xMet-loss+Acetyl [N-Term]	PREDICTED: probable glutathione S-transferase [Beta vulgaris subsp. vulgaris] PREDICTED: probable glutathione S-transferase [Beta vulgaris subsp. vulgaris]	731366007; 731365988	0	2020	18	176	68.4	161.3	84.9	127.7	27.4	127.2	131.3	39.4	56.4	2.18413e+07	1.72559e+07	2.51492e+07	1.08954e+07	6.27858e+06	5.68934e+06	1.35385e+07	1.9689e+07	7.24478e+06	9.97916e+06	4.43872e+07	1.72559e+07	4.06728e+07	2.14239e+07	3.22108e+07		6.91036e+06
FALSE		High	Unambiguous	MANDTMIVTNTPAR	[-].MANDTMIVTNTPAR.[D]	1xMet-loss [N-Term]	1xMet-loss [N-Term]	2.92902e-05	5.33751e-05	1.647	1	1	1	731366297	731366297 [1-14]	731366297 1xMet-loss [N-Term]	731366297 1xMet-loss [N-Term]	PREDICTED: vesicle-fusing ATPase [Beta vulgaris subsp. vulgaris]	731366297	0	1403.69	14						421.4	578.6									1.1008e+06	774631										1.33705e+06
FALSE		High	Unambiguous	MANDADMSGWTDLLHSSTK	[-].MANDADMSGWTDLLHSSTK.[L]	1xMet-loss+Acetyl [N-Term]	1xMet-loss+Acetyl [N-Term]	5.55927e-05	5.33751e-05	1.504	1	1	4	731324286	731324286 [1-19]	731324286 1xMet-loss+Acetyl [N-Term]	731324286 1xMet-loss+Acetyl [N-Term]	PREDICTED: nuclear pore complex protein NUP93A [Beta vulgaris subsp. vulgaris]	731324286	0	1990.88	19	348.9					173	259.1	96.8	122.1		518410					429969	330113	173813	268790		1.05354e+06						522247
FALSE		High	Unambiguous	MANAQLHIVDCEYLK	[-].MANAQLHIVDCEYLK.[Q]	1xCarbamidomethyl [C11]; 1xMet-loss+Acetyl [N-Term]	1xCarbamidomethyl [C11]; 1xMet-loss+Acetyl [N-Term]	2.70992e-06	5.33751e-05	2.163	1	1	7	1108934682	1108934682 [1-15]	1108934682 1xMet-loss+Acetyl [N-Term]	1108934682 1xMet-loss+Acetyl [N-Term]	PREDICTED: L-ascorbate peroxidase 3, peroxisomal-like [Beta vulgaris subsp. vulgaris]	1108934682	0	1715.84	15	7.6	344.4	45.3	187.4	274.5	14	31.4	33.5	10.5	51.4	183370	1.67851e+07	1.36436e+06	4646134	2.60767e+06	562415	645343	971220	373103	1.75832e+06	372655	1.67851e+07	2.20652e+06	9.13577e+06	1.3378e+07		683118
FALSE		High	Unambiguous	MANAASGMAVNDECK	[-].MANAASGMAVNDECK.[L]	1xCarbamidomethyl [C14]; 1xMet-loss+Acetyl [N-Term]	1xCarbamidomethyl [C14]; 1xMet-loss+Acetyl [N-Term]	3.4165e-05	5.33751e-05	1.613	1	1	3	731312007	731312007 [1-15]	731312007 1xMet-loss+Acetyl [N-Term]	731312007 1xMet-loss+Acetyl [N-Term]	PREDICTED: actin-depolymerizing factor 10 [Beta vulgaris subsp. vulgaris]	731312007	0	1479.62	15		33.4	6.1	37.9	66.5	211.4	256.1	146.3	192.7	49.6		1.41501e+06	158495	815438	548300	7.3653e+06	4.5723e+06	3.67901e+06	5.94394e+06	1.47189e+06		1.41501e+06	256328	1.60341e+06	2.81293e+06		8.94602e+06
FALSE		High	Unambiguous	MANAASGMAVDDQCKLK	[-].MANAASGMAVDDQCKLK.[F]	1xCarbamidomethyl [C14]; 1xOxidation [M8]; 1xMet-loss+Acetyl [N-Term]	1xCarbamidomethyl [C14]; 1xOxidation [M8]; 1xMet-loss+Acetyl [N-Term]	1.89034e-07	5.33751e-05	2.736	2	2	1	731318670; 731318668	731318670 [1-17]; 731318668 [1-17]	731318670 1xMet-loss+Acetyl [N-Term]; 731318668 1xMet-loss+Acetyl [N-Term]	731318670 1xMet-loss+Acetyl [N-Term]; 731318668 1xMet-loss+Acetyl [N-Term]	PREDICTED: actin-depolymerizing factor 4 [Beta vulgaris subsp. vulgaris] PREDICTED: actin-depolymerizing factor 4 [Beta vulgaris subsp. vulgaris]	731318670; 731318668	1	1736.79	17	15.3			78.9		15.5	64.1	28.1	62.4	735.8	59359.8			317305		100693	214053	131927	360008	4.08497e+06	120635			623923			122303
FALSE		High	Unambiguous	MANIDIEGILKEQPNDGR	[-].MANIDIEGILKEQPNDGR.[I]	1xMet-loss+Acetyl [N-Term]	1xMet-loss+Acetyl [N-Term]	6.97897e-07	5.33751e-05	2.455	1	1	10	731317849	731317849 [1-18]	731317849 1xMet-loss+Acetyl [N-Term]	731317849 1xMet-loss+Acetyl [N-Term]	PREDICTED: pyruvate kinase, cytosolic isozyme [Beta vulgaris subsp. vulgaris]	731317849	1	1923.98	18	111.8	355.2		70.1	20.9	146.6	51	19.9	132.8	91.7	1.30988e+06	8.45357e+06		847932	97104.6	2.87282e+06	512376	281556	2.30453e+06	1.53106e+06	2.66201e+06	8.45357e+06		1.6673e+06	498173		3.48938e+06
FALSE		High	Unambiguous	MANAASGMAVDDQCKLK	[-].MANAASGMAVDDQCKLK.[F]	1xCarbamidomethyl [C14]; 1xMet-loss+Acetyl [N-Term]	1xCarbamidomethyl [C14]; 1xMet-loss+Acetyl [N-Term]	1.50752e-08	5.33751e-05	3.28	2	2	27	731318670; 731318668	731318670 [1-17]; 731318668 [1-17]	731318670 1xMet-loss+Acetyl [N-Term]; 731318668 1xMet-loss+Acetyl [N-Term]	731318670 1xMet-loss+Acetyl [N-Term]; 731318668 1xMet-loss+Acetyl [N-Term]	PREDICTED: actin-depolymerizing factor 4 [Beta vulgaris subsp. vulgaris] PREDICTED: actin-depolymerizing factor 4 [Beta vulgaris subsp. vulgaris]	731318670; 731318668	1	1720.8	17	52.5	210.2	21.9	69.2	68.3	51.4	150.6	120.9	144.8	110.2	6.25734e+06	5.08933e+07	3.28089e+06	8.52681e+06	3.22464e+06	1.0248e+07	1.5383e+07	1.73953e+07	2.5568e+07	1.87218e+07	1.27166e+07	5.08933e+07	5.30605e+06	1.67664e+07	1.65433e+07		1.24474e+07
FALSE		High	Unambiguous	MANTTGLDEETASKVLR	[-].MANTTGLDEETASKVLR.[Q]	1xMet-loss+Acetyl [N-Term]	1xMet-loss+Acetyl [N-Term]	2.66006e-06	5.33751e-05	2.167	1	1	3	731317156	731317156 [1-17]	731317156 1xMet-loss+Acetyl [N-Term]	731317156 1xMet-loss+Acetyl [N-Term]	PREDICTED: la protein 1 [Beta vulgaris subsp. vulgaris]	731317156	1	1746.89	17	443.4	236.1		65.5	28.4			150.2	39.5	36.9	1.75224e+06	1.89639e+06		267664	44420.3			717159	231496	207876	3.56101e+06	1.89639e+06		526313	227888
FALSE		High	Unambiguous	MANYLPATTDSLSLALEAK	[-].MANYLPATTDSLSLALEAK.[T]	1xMet-loss+Acetyl [N-Term]	1xMet-loss+Acetyl [N-Term]	2.33265e-05	5.33751e-05	1.697	1	1	6	731332435	731332435 [1-19]	731332435 1xMet-loss+Acetyl [N-Term]	731332435 1xMet-loss+Acetyl [N-Term]	PREDICTED: 26S proteasome non-ATPase regulatory subunit 11 homolog [Beta vulgaris subsp. vulgaris]	731332435	0	1920	19	372.2	335.6		9.1	3.7	12.9	25.1	113.4	127.9		3.82323e+06	7006489		96596.2	15072.6	221767	221529	1.40791e+06	1.9472e+06		7.76981e+06	7006489		189939	77326.5		269362
FALSE		High	Unambiguous	TVAVQPAGKDSVVLTTTK	[K].TVAVQPAGKDSVVLTTTK.[T]	1xGG [K9]	1xGG [K9]	8.60338e-05	5.33751e-05	1.403	1	1	1	731357196	731357196 [56-73]			PREDICTED: 60S ribosomal protein L28-1 [Beta vulgaris subsp. vulgaris]	731357196	1	1929.07	18
FALSE		High	Unambiguous	MAQAQQAIVNNDKNQMR	[-].MAQAQQAIVNNDKNQMR.[N]	1xMet-loss+Acetyl [N-Term]	1xMet-loss+Acetyl [N-Term]	4.92493e-07	5.33751e-05	2.53	1	1	12	731312253	731312253 [1-17]	731312253 1xMet-loss+Acetyl [N-Term]	731312253 1xMet-loss+Acetyl [N-Term]	PREDICTED: jasmonate-induced protein homolog [Beta vulgaris subsp. vulgaris]	731312253	1	1870.92	17	70	72.9		38.1	8.2	148.6	294	27.5	144.1	196.7	1.26075e+06	2.66675e+06		708097	58275.7	4.4751e+06	4.53951e+06	597694	3.84224e+06	5.05106e+06	2.56217e+06	2.66675e+06		1.39234e+06	298970		5.43553e+06
FALSE		High	Unambiguous	MAQAMASNHVIEK	[-].MAQAMASNHVIEK.[Y]	1xMet-loss+Acetyl [N-Term]	1xMet-loss+Acetyl [N-Term]	2.20915e-06	5.33751e-05	2.207	1	1	10	731329846	731329846 [1-13]	731329846 1xMet-loss+Acetyl [N-Term]	731329846 1xMet-loss+Acetyl [N-Term]	PREDICTED: protein GOS9 [Beta vulgaris subsp. vulgaris]	731329846	0	1340.66	13	53	18	53.6	12.5	28.9	144	221.8	143.4	168.4	156.4	2.07297e+06	1.4339e+06	2.63365e+06	504946	447261	9.42545e+06	7.44038e+06	6.77394e+06	9.75711e+06	8724046	4.21282e+06	1.4339e+06	4.25929e+06	992885	2.29457e+06		1.14483e+07
FALSE		High	Unambiguous	YHSTKSGEEMTSLKDYVTR	[R].YHSTKSGEEMTSLKDYVTR.[M]	1xGG [K5]	1xGG [K5]	1.07792e-05	5.33751e-05	1.865	1	1	1	731330156	731330156 [436-454]			PREDICTED: heat shock cognate protein 80 [Beta vulgaris subsp. vulgaris]	731330156	2	2346.1	19
FALSE		High	Unambiguous	MAQAIAKNQIVAK	[-].MAQAIAKNQIVAK.[Y]	1xMet-loss+Acetyl [N-Term]	1xMet-loss+Acetyl [N-Term]	2.78647e-06	5.33751e-05	2.157	6	9	20	731337638; 731337636; 731337645; 731330705; 731337649; 731319400	731337638 [1-13]; 731337636 [1-13]; 731337645 [1-13]; 731330705 [1-13]; 731337649 [1-13]; 731319400 [1-13]	731337638 1xMet-loss+Acetyl [N-Term]; 731337636 1xMet-loss+Acetyl [N-Term]; 731337645 1xMet-loss+Acetyl [N-Term]; 731330705 1xMet-loss+Acetyl [N-Term]; 731337649 1xMet-loss+Acetyl [N-Term]; 731319400 1xMet-loss+Acetyl [N-Term]	731337638 1xMet-loss+Acetyl [N-Term]; 731337636 1xMet-loss+Acetyl [N-Term]; 731337645 1xMet-loss+Acetyl [N-Term]; 731330705 1xMet-loss+Acetyl [N-Term]; 731337649 1xMet-loss+Acetyl [N-Term]; 731319400 1xMet-loss+Acetyl [N-Term]	PREDICTED: mannose/glucose-specific lectin isoform X1 [Beta vulgaris subsp. vulgaris] PREDICTED: mannose/glucose-specific lectin [Beta vulgaris subsp. vulgaris] PREDICTED: mannose/glucose-specific lectin [Beta vulgaris subsp. vulgaris] PREDICTED: mannose/glucose-specific lectin [Beta vulgaris subsp. vulgaris] PREDICTED: mannose/glucose-specific lectin [Beta vulgaris subsp. vulgaris] PREDICTED: ma…	731337638; 731337636; 731337645; 731337642; 731330705; 731337649; 731319396; 731319400; 731319398	1	1296.76	13	204.7	14.8	0.4	36.6	19.3		172.5	333.1	151.2	67.4	1.89403e+07	2.78556e+06	49555.7	3.50418e+06	706469		1.36912e+07	3.72362e+07	2.0732e+07	8.90255e+06	3.84916e+07	2.78556e+06	80144.4	6.89032e+06	3.62437e+06
FALSE		High	Unambiguous	MAPVPNSESINPKDVCIVGVAR	[-].MAPVPNSESINPKDVCIVGVAR.[T]	1xCarbamidomethyl [C16]; 1xMet-loss [N-Term]	1xCarbamidomethyl [C16]; 1xMet-loss [N-Term]	6.15917e-06	5.33751e-05	1.986	1	1	2	1108976536	1108976536 [1-22]	1108976536 1xMet-loss [N-Term]	1108976536 1xMet-loss [N-Term]	PREDICTED: acetyl-CoA acetyltransferase, cytosolic 1 [Beta vulgaris subsp. vulgaris]	1108976536	1	2222.16	22	46.8	319.1			12	8.6	77	492.5	43.9		178776	2.47766e+06			18169.3	55149	252416	2272917	248664		363321	2.47766e+06			93213.1		66984.8
FALSE		High	Unambiguous	MAPVPNSESINPK	[-].MAPVPNSESINPK.[D]	1xMet-loss [N-Term]	1xMet-loss [N-Term]	6.09623e-05	5.33751e-05	1.483	1	1	2	1108976536	1108976536 [1-13]	1108976536 1xMet-loss [N-Term]	1108976536 1xMet-loss [N-Term]	PREDICTED: acetyl-CoA acetyltransferase, cytosolic 1 [Beta vulgaris subsp. vulgaris]	1108976536	0	1252.65	13		90	284.2	229.5	200.7	34.1	14.7		7.5	139.4		2.69368e+06	5.25747e+06	3.49255e+06	1.17046e+06	839367	185018		163864	2.92797e+06		2.69368e+06	8.50269e+06	6.86746e+06	6.00476e+06		1.01951e+06
FALSE		High	Unambiguous	MAPSTLICDTDAWQNLK	[-].MAPSTLICDTDAWQNLK.[M]	1xCarbamidomethyl [C8]; 1xMet-loss [N-Term]	1xCarbamidomethyl [C8]; 1xMet-loss [N-Term]	4.35046e-06	5.33751e-05	2.061	1	1	21	731333012	731333012 [1-17]	731333012 1xMet-loss [N-Term]	731333012 1xMet-loss [N-Term]	PREDICTED: glucose-6-phosphate isomerase, cytosolic [Beta vulgaris subsp. vulgaris]	731333012	0	1832.88	17	35.5	287.6	2	123.4	92.2	86	74.5	87.5	130.8	80.4	1.42086e+06	2.33692e+07	101345	5.09846e+06	1.46001e+06	5.75429e+06	2.55584e+06	4228175	7751991	4.58671e+06	2.88756e+06	2.33692e+07	163901	1.00252e+07	7.49026e+06		6.98926e+06
FALSE		High	Unambiguous	MANVEAASAAAGPR	[-].MANVEAASAAAGPR.[Y]	1xMet-loss+Acetyl [N-Term]	1xMet-loss+Acetyl [N-Term]	3.09284e-05	5.33751e-05	1.635	1	1	3	731323731	731323731 [1-14]	731323731 1xMet-loss+Acetyl [N-Term]	731323731 1xMet-loss+Acetyl [N-Term]	PREDICTED: DEAD-box ATP-dependent RNA helicase 14 [Beta vulgaris subsp. vulgaris]	731323731	0	1226.61	14	291.6	112.6	11	17.2	51.6	113	171.4	48.8	67.2	115.6	1.75092e+06	1.37431e+06	82687.7	106626	122717	1.13472e+06	882447	353625	598059	989933	3.55834e+06	1.37431e+06	133727	209660	629570		1.37825e+06
FALSE		High	Unambiguous	MAPPTRIGLAGLAVMGQNLALNIADKGFPISVYNR	[-].MAPPTRIGLAGLAVMGQNLALNIADKGFPISVYNR.[T]	1xMet-loss [N-Term]	1xMet-loss [N-Term]	2.771e-11	5.33751e-05	4.635	1	1	17	731340274	731340274 [1-35]	731340274 1xMet-loss [N-Term]	731340274 1xMet-loss [N-Term]	PREDICTED: 6-phosphogluconate dehydrogenase, decarboxylating 1 [Beta vulgaris subsp. vulgaris]	731340274	2	3537.94	35	184.2	30.3	0.5	80.6	12.9	7.4	156.4	326.1	130.7	70.7	9.14601e+06	3.05947e+06	34194.4	4137314	254179	614482	6.66111e+06	1.95586e+07	9.61321e+06	5.00942e+06	1.85871e+07	3.05947e+06	55301.2	8.13527e+06	1.30401e+06		746359
FALSE		High	Unambiguous	MAPPLLFEDIFNIIR	[-].MAPPLLFEDIFNIIR.[V]	1xMet-loss [N-Term]	1xMet-loss [N-Term]	6.75697e-06	5.33751e-05	1.966	1	1	25	731325404	731325404 [1-15]	731325404 1xMet-loss [N-Term]	731325404 1xMet-loss [N-Term]	PREDICTED: DNA-directed RNA polymerases II, IV and V subunit 8B [Beta vulgaris subsp. vulgaris]	731325404	0	1657.93	15	156.8	70.8	168.1	47.7		85.5	243.2	19.3	88.2	120.5	1.29872e+07	1.19197e+07	1.74955e+07	4.08408e+06		1.18571e+07	1.72816e+07	1.92689e+06	1.08252e+07	1.4237e+07	2.63933e+07	1.19197e+07	2.82947e+07	8.03059e+06			1.44018e+07
FALSE		High	Unambiguous	MAPLAVGDVIPDGNLKYFDENNQSQDVSIHSLSAGK	[-].MAPLAVGDVIPDGNLKYFDENNQSQDVSIHSLSAGK.[I]	1xMet-loss [N-Term]	1xMet-loss [N-Term]	3.57915e-08	5.33751e-05	3.094	1	1	18	731359618	731359618 [1-36]	731359618 1xMet-loss [N-Term]	731359618 1xMet-loss [N-Term]	PREDICTED: peroxiredoxin-2B [Beta vulgaris subsp. vulgaris]	731359618	1	3698.83	36	77.4	359.7		269.2	86.6	23.8	8.2	57.6	58.8	58.8	4.63771e+06	4.38011e+07		1.66694e+07	2.05495e+06	2.38825e+06	419249	4.1713e+06	5.22108e+06	5.02528e+06	9.42505e+06	4.38011e+07		3.27773e+07	1.05424e+07		2.90081e+06
FALSE		High	Unambiguous	MAPLAVGDVIPDGNLK	[-].MAPLAVGDVIPDGNLK.[Y]	1xMet-loss [N-Term]	1xMet-loss [N-Term]	8.11159e-08	5.33751e-05	2.918	1	1	45	731359618	731359618 [1-16]	731359618 1xMet-loss [N-Term]	731359618 1xMet-loss [N-Term]	PREDICTED: peroxiredoxin-2B [Beta vulgaris subsp. vulgaris]	731359618	0	1478.82	16	133	225.4	27.6	59.4	72.5	75.1	89.5	75.6	97.2	144.6	3.10819e+07	1.06994e+08	8.10718e+06	1.43507e+07	6.71068e+06	2.93707e+07	1.79313e+07	2.13423e+07	3.36272e+07	4.81789e+07	6.31666e+07	1.06994e+08	1.31114e+07	2.82181e+07	3.44276e+07		3.56742e+07
FALSE		High	Unambiguous	MAPKQPNTGLFVGLNR	[-].MAPKQPNTGLFVGLNR.[G]	1xMet-loss [N-Term]	1xMet-loss [N-Term]	1.91291e-06	5.33751e-05	2.238	2	2	50	731316698; 1108898186	731316698 [1-16]; 1108898186 [1-16]	731316698 1xMet-loss [N-Term]; 1108898186 1xMet-loss [N-Term]	731316698 1xMet-loss [N-Term]; 1108898186 1xMet-loss [N-Term]	PREDICTED: 60S ribosomal protein L36-2 [Beta vulgaris subsp. vulgaris] PREDICTED: 60S ribosomal protein L36-2 [Beta vulgaris subsp. vulgaris]	731316698; 1108898186	1	1611.9	16	356.9	199.5	36.9	59.5	129.9	32.6	31.2	39.6	48.7	65.3	4.81682e+07	5.47161e+07	6.25924e+06	8.29729e+06	6.94424e+06	7.36061e+06	3.60801e+06	6.45044e+06	9.73983e+06	1.25744e+07	9.78905e+07	5.47161e+07	1.01228e+07	1.63151e+07	3.56258e+07		8.94032e+06
FALSE		High	Unambiguous	MAPGIGGFGGLFPLGDSYLVAGTDGVGTK	[K].MAPGIGGFGGLFPLGDSYLVAGTDGVGTK.[L]			6.20379e-05	5.33751e-05	1.479	1	1	7	731357945	731357945 [112-140]			PREDICTED: phosphoribosylformylglycinamidine cyclo-ligase, chloroplastic [Beta vulgaris subsp. vulgaris]	731357945	0	2754.38	29	23.3	215.7		154.1	65.8	19	55.6	165.7	188.6	112.1	193406	3640281		1.32228e+06	216352	263917	396188	1.66249e+06	2.3204e+06	1.32801e+06	393052	3640281		2.60001e+06	1.10994e+06		320558
FALSE		High	Unambiguous	MAPEEALGDVLQVPLGCVTPFALANESAR	[R].MAPEEALGDVLQVPLGCVTPFALANESAR.[H]	1xCarbamidomethyl [C17]	1xCarbamidomethyl [C17]	4.63571e-05	5.33751e-05	1.545	1	1	1	731362977	731362977 [86-114]			PREDICTED: proline--tRNA ligase [Beta vulgaris subsp. vulgaris]	731362977	0	3055.52	29		677.2		78.3				116.6	92	35.8		5200876		305902				532309	514934	193190		5200876		601500
FALSE		High	Unambiguous	MAPEATETANANCLGWAAR	[-].MAPEATETANANCLGWAAR.[D]	1xCarbamidomethyl [C13]; 1xMet-loss [N-Term]	1xCarbamidomethyl [C13]; 1xMet-loss [N-Term]	1.29483e-06	5.33751e-05	2.322	1	1	2	731313387	731313387 [1-19]	731313387 1xMet-loss [N-Term]	731313387 1xMet-loss [N-Term]	PREDICTED: probable cinnamyl alcohol dehydrogenase 1 [Beta vulgaris subsp. vulgaris]	731313387	0	1902.88	19
FALSE		High	Unambiguous	MAPALPQFYSGTSTLALVARVSAFTAGVVYGNMKLK	[-].MAPALPQFYSGTSTLALVARVSAFTAGVVYGNMKLK.[V]	1xMet-loss [N-Term]	1xMet-loss [N-Term]	2.8763e-05	5.33751e-05	1.651	1	1	1	731370884	731370884 [1-36]	731370884 1xMet-loss [N-Term]	731370884 1xMet-loss [N-Term]	PREDICTED: uncharacterized protein LOC104883110 [Beta vulgaris subsp. vulgaris]	731370884	2	3628.96	36
FALSE		High	Unambiguous	MAPPLVTLLSAEPEIQYVALR	[K].MAPPLVTLLSAEPEIQYVALR.[N]			8.63513e-06	5.33751e-05	1.913	1	1	5	731331043	731331043 [284-304]			PREDICTED: beta-adaptin-like protein C [Beta vulgaris subsp. vulgaris]	731331043	0	2311.27	21		124.5		234.8	171.5	243.5		117.6	108.1			1.6058e+06		1.53948e+06	431133	2.58486e+06		901596	1016196			1.6058e+06		3.02711e+06	2.21183e+06		3.13962e+06
FALSE		High	Unambiguous	MAGVAPEGSQYDAR	[-].MAGVAPEGSQYDAR.[Q]	1xMet-loss+Acetyl [N-Term]	1xMet-loss+Acetyl [N-Term]	6.63296e-06	5.33751e-05	1.97	1	1	21	731317796	731317796 [1-14]	731317796 1xMet-loss+Acetyl [N-Term]	731317796 1xMet-loss+Acetyl [N-Term]	PREDICTED: eukaryotic initiation factor 4A-9 [Beta vulgaris subsp. vulgaris]	731317796	0	1362.63	14	149.6	168.2	12	24.4	40.2	97.8	163.4	88.2	157	99.1	18643232	4.26005e+07	1.8857e+06	3.14639e+06	1.98595e+06	2.04006e+07	1.74701e+07	1.32771e+07	2.89837e+07	1.76247e+07	3.78879e+07	4.26005e+07	3.04967e+06	6.1868e+06	1.01885e+07		2.47789e+07
FALSE		High	Unambiguous	MANAASGMAVDDQCK	[-].MANAASGMAVDDQCK.[L]	1xCarbamidomethyl [C14]; 1xOxidation [M8]; 1xMet-loss+Acetyl [N-Term]	1xCarbamidomethyl [C14]; 1xOxidation [M8]; 1xMet-loss+Acetyl [N-Term]	3.24776e-06	5.33751e-05	2.124	2	2	1	731318670; 731318668	731318670 [1-15]; 731318668 [1-15]	731318670 1xMet-loss+Acetyl [N-Term]; 731318668 1xMet-loss+Acetyl [N-Term]	731318670 1xMet-loss+Acetyl [N-Term]; 731318668 1xMet-loss+Acetyl [N-Term]	PREDICTED: actin-depolymerizing factor 4 [Beta vulgaris subsp. vulgaris] PREDICTED: actin-depolymerizing factor 4 [Beta vulgaris subsp. vulgaris]	731318670; 731318668	0	1495.62	15	25.9									974.1	53023.4									2.84892e+06	107758
FALSE		High	Unambiguous	MANAASGMAVDDECKLK	[-].MANAASGMAVDDECKLK.[F]	1xCarbamidomethyl [C14]; 1xMet-loss+Acetyl [N-Term]	1xCarbamidomethyl [C14]; 1xMet-loss+Acetyl [N-Term]	2.67244e-06	5.33751e-05	2.166	1	1	6	1108898259	1108898259 [1-17]	1108898259 1xMet-loss+Acetyl [N-Term]	1108898259 1xMet-loss+Acetyl [N-Term]	PREDICTED: actin-depolymerizing factor 7 [Beta vulgaris subsp. vulgaris]	1108898259	1	1721.78	17		242		21.5		163.6	194.2	145.9	175.6	57.1		2.20149e+06		99507.2		1.22571e+06	745699	788981	1.1645e+06	364905		2.20149e+06		195663			1.48877e+06
FALSE		High	Unambiguous	MALLNDLINLNLSETSDKIIAEYIWIGGSGLDMR	[-].MALLNDLINLNLSETSDKIIAEYIWIGGSGLDMR.[S]	1xMet-loss+Acetyl [N-Term]	1xMet-loss+Acetyl [N-Term]	9.84379e-10	5.33751e-05	3.867	1	1	53	731354634	731354634 [1-34]	731354634 1xMet-loss+Acetyl [N-Term]	731354634 1xMet-loss+Acetyl [N-Term]	PREDICTED: glutamine synthetase nodule isozyme [Beta vulgaris subsp. vulgaris]	731354634	1	3689.91	34	76	21	20.6	153	131.8	33.7	95.7	301.7	87	79.3	5.31348e+07	2.9879e+07	1.80972e+07	1.10545e+08	3.64947e+07	3.94704e+07	5.73951e+07	2.54789e+08	9.00964e+07	7.90566e+07	1.07984e+08	2.9879e+07	2.92678e+07	2.17367e+08	1.87228e+08		4.79414e+07
FALSE		High	Unambiguous	MALLNDLINLNLSETSDK	[-].MALLNDLINLNLSETSDK.[I]	1xMet-loss+Acetyl [N-Term]	1xMet-loss+Acetyl [N-Term]	6.28155e-08	5.33751e-05	2.973	1	1	29	731354634	731354634 [1-18]	731354634 1xMet-loss+Acetyl [N-Term]	731354634 1xMet-loss+Acetyl [N-Term]	PREDICTED: glutamine synthetase nodule isozyme [Beta vulgaris subsp. vulgaris]	731354634	0	1915	18	94.7	236.6	153.5	22.8	146.2	86.6	52.8	91.1	70.2	45.4	1.33897e+07	6.79946e+07	27270795	3.33574e+06	8.19052e+06	20478103	6.40256e+06	1.55691e+07	1.47044e+07	9.15972e+06	2.72115e+07	6.79946e+07	4.41039e+07	6.55912e+06	4.20195e+07		2.4873e+07
FALSE		High	Unambiguous	MAILENLTREQYVYMAK	[-].MAILENLTREQYVYMAK.[L]	1xMet-loss+Acetyl [N-Term]	1xMet-loss+Acetyl [N-Term]	1.23793e-05	5.33751e-05	1.835	1	1	24	731312607	731312607 [1-17]	731312607 1xMet-loss+Acetyl [N-Term]	731312607 1xMet-loss+Acetyl [N-Term]	PREDICTED: 14-3-3 protein 1 [Beta vulgaris subsp. vulgaris]	731312607	1	1984.02	17	152.5	164	16.2	180.4	54.8	10.5	40	227	97.3	57.4	7.99528e+06	1.74647e+07	1.06853e+06	9.77086e+06	1.13776e+06	920435	1.79616e+06	1.43742e+07	7.55545e+06	4.29081e+06	1.62485e+07	1.74647e+07	1.72808e+06	1.92126e+07	5.83702e+06		1.11798e+06
FALSE		High	Unambiguous	MAIEHEDELKDEKNPRPLDEDDIALLK	[-].MAIEHEDELKDEKNPRPLDEDDIALLK.[T]	1xMet-loss [N-Term]	1xMet-loss [N-Term]	6.45922e-08	5.33751e-05	2.967	1	1	18	731347859	731347859 [1-27]	731347859 1xMet-loss [N-Term]	731347859 1xMet-loss [N-Term]	PREDICTED: 26S protease regulatory subunit 7 [Beta vulgaris subsp. vulgaris]	731347859	2	3045.54	27	6.1	135.4	45.9	104.5	444.2	69.1	66.2	21	37.2	70.4	542562	2.43421e+07	5104112	9.56014e+06	1.55683e+07	1.02238e+07	5.02277e+06	2.24447e+06	4.87498e+06	8.88953e+06	1.10263e+06	2.43421e+07	8.25467e+06	1.87983e+07	7.98695e+07		1.2418e+07
FALSE		High	Unambiguous	MALDFESLTEATSGAVGALVSTTVLYPLDTCK	[-].MALDFESLTEATSGAVGALVSTTVLYPLDTCK.[T]	1xCarbamidomethyl [C31]; 1xMet-loss+Acetyl [N-Term]	1xCarbamidomethyl [C31]; 1xMet-loss+Acetyl [N-Term]	2.68488e-06	5.33751e-05	2.165	1	1	1	731373838	731373838 [1-32]	731373838 1xMet-loss+Acetyl [N-Term]	731373838 1xMet-loss+Acetyl [N-Term]	PREDICTED: peroxisomal adenine nucleotide carrier 1 [Beta vulgaris subsp. vulgaris]	731373838	0	3271.63	32								771.9	228.1									573967	207981
FALSE		High	Unambiguous	MAIDDLVGLSGENVKPLPEHYAQALR	[K].MAIDDLVGLSGENVKPLPEHYAQALR.[T]	1xOxidation [M1]	1xOxidation [M1]	4.42559e-07	5.33751e-05	2.553	1	1	1	731345339	731345339 [150-175]			PREDICTED: succinate dehydrogenase subunit 5, mitochondrial [Beta vulgaris subsp. vulgaris]	731345339	0	2852.46	26										1000										3.73714e+06
FALSE		High	Unambiguous	MAIDDLVGLSGENVKPLPEHYAQALR	[K].MAIDDLVGLSGENVKPLPEHYAQALR.[T]			1.42783e-09	5.33751e-05	3.787	1	1	37	731345339	731345339 [150-175]			PREDICTED: succinate dehydrogenase subunit 5, mitochondrial [Beta vulgaris subsp. vulgaris]	731345339	0	2836.47	26	86.5	144.7	44.5	95.3	210.9	72.7	82.7	79.8	107.2	75.7	1.44843e+07	49263771	9.37278e+06	1.64998e+07	1.39955e+07	2.03857e+07	1.18819e+07	1.61527e+07	2.66169e+07	1.80956e+07	2.94359e+07	49263771	1.51582e+07	3.24439e+07	7.18006e+07		2.47608e+07
FALSE		High	Unambiguous	MAIATSSSSLLK	[-].MAIATSSSSLLK.[T]	1xMet-loss+Acetyl [N-Term]	1xMet-loss+Acetyl [N-Term]	4.35494e-05	5.33751e-05	1.559	1	1	62	731320240	731320240 [1-12]	731320240 1xMet-loss+Acetyl [N-Term]	731320240 1xMet-loss+Acetyl [N-Term]	PREDICTED: cytochrome b-c1 complex subunit 7-2 [Beta vulgaris subsp. vulgaris]	731320240	0	1119.63	12	103.5	157.5	5.1	51.1	50.3	105.1	112.8	117.4	166.2	130.9	4.03341e+07	1.24676e+08	2500470	2.05887e+07	7.76456e+06	6.85104e+07	3.76918e+07	5.52466e+07	9.59594e+07	7.27646e+07	8.19694e+07	1.24676e+08	4.04391e+06	4.04839e+07	3.98343e+07		8.32138e+07
FALSE		High	Unambiguous	MALLNDLINLNLSETSDKIIAEYIWIGGSGLDMR	[-].MALLNDLINLNLSETSDKIIAEYIWIGGSGLDMR.[S]	1xOxidation [M33]; 1xMet-loss+Acetyl [N-Term]	1xOxidation [M33]; 1xMet-loss+Acetyl [N-Term]	4.59944e-06	5.33751e-05	2.049	1	1	17	731354634	731354634 [1-34]	731354634 1xMet-loss+Acetyl [N-Term]	731354634 1xMet-loss+Acetyl [N-Term]	PREDICTED: glutamine synthetase nodule isozyme [Beta vulgaris subsp. vulgaris]	731354634	1	3705.9	34	22.5	16.5	11.1	147.8	416.1	17.7	206.2	142.3	3.3	16.6	1.48266e+06	2.21158e+06	921029	10067778	1.08627e+07	1.94691e+06	1.16547e+07	1.13302e+07	321053	1.55887e+06	3.01315e+06	2.21158e+06	1.48954e+06	1.97964e+07	5.57287e+07		2.36475e+06
FALSE		High	Unambiguous	MALAFDEYGRPFIILR	[-].MALAFDEYGRPFIILR.[E]	1xMet-loss+Acetyl [N-Term]	1xMet-loss+Acetyl [N-Term]	2.24895e-05	5.33751e-05	1.705	1	1	51	731342366	731342366 [1-16]	731342366 1xMet-loss+Acetyl [N-Term]	731342366 1xMet-loss+Acetyl [N-Term]	PREDICTED: T-complex protein 1 subunit epsilon [Beta vulgaris subsp. vulgaris]	731342366	0	1822.99	16	44.5	126.5	129.1	171.5	63.5	136.3	118.2	44.9	88.9	76.5	1.33081e+07	7.68392e+07	48495071	5.29626e+07	7.51721e+06	6.81485e+07	3.02787e+07	1.62217e+07	3.93396e+07	3.26256e+07	2.70456e+07	7.68392e+07	7.84291e+07	1.04141e+08	3.85653e+07		8.27743e+07
FALSE		High	Unambiguous	MAKGPGLYTDIGKK	[-].MAKGPGLYTDIGKK.[A]	1xMet-loss [N-Term]	1xMet-loss [N-Term]	3.05107e-05	5.33751e-05	1.638	1	1	16	731319528	731319528 [1-14]	731319528 1xMet-loss [N-Term]	731319528 1xMet-loss [N-Term]	PREDICTED: mitochondrial outer membrane protein porin of 34 kDa [Beta vulgaris subsp. vulgaris]	731319528	2	1347.76	14	153.8	46.2	59.9	120.9	76.9	76.7	96.4	138.2	156.4	74.8	1.25729e+07	7.66792e+06	6154282	1.02115e+07	2488449	10486111	6.75649e+06	1.36416e+07	1.8934e+07	8.71814e+06	2.55515e+07	7.66792e+06	9.95307e+06	2.0079e+07	1.27664e+07		1.27366e+07
FALSE		High	Unambiguous	MAKEVKVLGLWPSPFAMR	[-].MAKEVKVLGLWPSPFAMR.[S]	1xMet-loss+Acetyl [N-Term]	1xMet-loss+Acetyl [N-Term]	8.71303e-05	5.33751e-05	1.4	1	1	16	731344229	731344229 [1-18]	731344229 1xMet-loss+Acetyl [N-Term]	731344229 1xMet-loss+Acetyl [N-Term]	PREDICTED: glutathione S-transferase U17 [Beta vulgaris subsp. vulgaris]	731344229	2	1971.09	18	97.3	12.6	4.5	187.2	154.9		165.5	213.2	92.3	72.5	3.26103e+06	861043	189197	6.48469e+06	2.05598e+06		4.75665e+06	8.63294e+06	4.58389e+06	3.46576e+06	6.62727e+06	861043	305980	1.2751e+07	1.05477e+07
FALSE		High	Unambiguous	MAKDSIGEEVEKMVAELPEGGVVLLENVR	[K].MAKDSIGEEVEKMVAELPEGGVVLLENVR.[F]	1xOxidation [M13]	1xOxidation [M13]	2.53226e-05	5.33751e-05	1.679	1	1	2	731318922	731318922 [94-122]			PREDICTED: phosphoglycerate kinase 3, cytosolic [Beta vulgaris subsp. vulgaris]	731318922	2	3157.61	29	181			427.9					153	238.1	525858			1.28457e+06					658418	986258	1.06868e+06			2.52588e+06
FALSE		High	Unambiguous	MAKDSIGEEVEKMVAELPEGGVVLLENVR	[K].MAKDSIGEEVEKMVAELPEGGVVLLENVR.[F]			3.74307e-10	5.33751e-05	4.075	1	1	64	731318922	731318922 [94-122]			PREDICTED: phosphoglycerate kinase 3, cytosolic [Beta vulgaris subsp. vulgaris]	731318922	2	3141.62	29	280.5	49.1	111.3	87.1	239.6	48.4	123.8	18.8	15.3	26	2.04778e+08	7.27736e+07	1.02135e+08	6.57316e+07	6.92965e+07	5.90935e+07	7.75004e+07	1.65669e+07	1.65349e+07	2.70919e+07	4.16162e+08	7.27736e+07	1.65179e+08	1.29249e+08	3.5551e+08		7.17759e+07
FALSE		High	Unambiguous	MAKDSIGEEVEK	[K].MAKDSIGEEVEK.[M]			1.2418e-06	5.33751e-05	2.331	1	1	12	731318922	731318922 [94-105]			PREDICTED: phosphoglycerate kinase 3, cytosolic [Beta vulgaris subsp. vulgaris]	731318922	1	1335.65	12	88.1	40.3	38	125.6	99.2	144.3	148	74	173.2	69.3	6.56377e+06	6101283	3.55961e+06	9.67163e+06	2.92972e+06	1.79907e+07	9.45952e+06	6.6596e+06	1.91261e+07	7.3659e+06	1.33393e+07	6101283	5.75681e+06	1.90175e+07	1.50303e+07		2.18519e+07
FALSE		High	Unambiguous	MAHCGSNYYEKEVIR	[-].MAHCGSNYYEKEVIR.[E]	1xCarbamidomethyl [C4]; 1xMet-loss+Acetyl [N-Term]	1xCarbamidomethyl [C4]; 1xMet-loss+Acetyl [N-Term]	6.45118e-06	5.33751e-05	1.976	1	1	9	731330784	731330784 [1-15]	731330784 1xMet-loss+Acetyl [N-Term]	731330784 1xMet-loss+Acetyl [N-Term]	PREDICTED: uncharacterized protein LOC104892175 [Beta vulgaris subsp. vulgaris]	731330784	1	1767.81	15		111.3		70.1	187.5	77.7	98.3	130.8	94.9	229.4		5.08156e+06		1.62617e+06	1.66854e+06	2.92072e+06	1.89355e+06	3.54889e+06	3.15804e+06	7.34769e+06		5.08156e+06		3.19757e+06	8.56006e+06		3.54755e+06
FALSE		High	Unambiguous	MAGYRTDDDYDYLFK	[-].MAGYRTDDDYDYLFK.[L]	1xMet-loss+Acetyl [N-Term]	1xMet-loss+Acetyl [N-Term]	2.73604e-05	5.33751e-05	1.662	1	1	9	731356530	731356530 [1-15]	731356530 1xMet-loss+Acetyl [N-Term]	731356530 1xMet-loss+Acetyl [N-Term]	PREDICTED: ras-related protein YPT3 [Beta vulgaris subsp. vulgaris]	731356530	1	1783.78	15	7.2	105.3	58.3	173.6	257.4	103.8	62.6	62.3	58.2	111.3	145998	4.3314e+06	1.4825e+06	3.63046e+06	2.06303e+06	3.51549e+06	1.08622e+06	1.52287e+06	1.74359e+06	3.21364e+06	296706	4.3314e+06	2.39758e+06	7.13864e+06	1.05839e+07		4.26997e+06
FALSE		High	Unambiguous	MAGYRAEDDYDYLFK	[-].MAGYRAEDDYDYLFK.[V]	1xMet-loss+Acetyl [N-Term]	1xMet-loss+Acetyl [N-Term]	4.07207e-05	5.33751e-05	1.574	1	1	8	731349916	731349916 [1-15]	731349916 1xMet-loss+Acetyl [N-Term]	731349916 1xMet-loss+Acetyl [N-Term]	PREDICTED: ras-related protein RIC2 [Beta vulgaris subsp. vulgaris]	731349916	1	1767.79	15		181.7	1.6	124.7	86.1	287.6	77.7	68.3	61.7	110.6		1.13866e+07	61767.1	3.97387e+06	1.05121e+06	1.48352e+07	2.05361e+06	2.54355e+06	2.81674e+06	4.8645e+06		1.13866e+07	99893.3	7.81389e+06	5.39297e+06		1.8019e+07
FALSE		High	Unambiguous	AGVVHMMGESEVMANKGAGIGK	[K].AGVVHMMGESEVMANKGAGIGK.[K]	1xGG [K16]	1xGG [K16]	1.28444e-05	5.33751e-05	1.827	1	1	2	731320242	731320242 [703-724]			PREDICTED: potassium transporter 5 [Beta vulgaris subsp. vulgaris]	731320242	1	2287.1	22
FALSE		High	Unambiguous	MANAASGMAVDDQCK	[-].MANAASGMAVDDQCK.[L]	1xCarbamidomethyl [C14]; 1xMet-loss+Acetyl [N-Term]	1xCarbamidomethyl [C14]; 1xMet-loss+Acetyl [N-Term]	8.32703e-07	5.33751e-05	2.417	2	2	16	731318670; 731318668	731318670 [1-15]; 731318668 [1-15]	731318670 1xMet-loss+Acetyl [N-Term]; 731318668 1xMet-loss+Acetyl [N-Term]	731318670 1xMet-loss+Acetyl [N-Term]; 731318668 1xMet-loss+Acetyl [N-Term]	PREDICTED: actin-depolymerizing factor 4 [Beta vulgaris subsp. vulgaris] PREDICTED: actin-depolymerizing factor 4 [Beta vulgaris subsp. vulgaris]	731318670; 731318668	0	1479.62	15		135.2	3.4	25.8	47.6	151.3	209.5	102.6	168	156.5		1.02948e+07	158495	1.0007e+06	707011	9.48822e+06	6.73225e+06	4.64563e+06	9.32667e+06	8.36213e+06		1.02948e+07	256328	1.9677e+06	3.62715e+06		1.15246e+07
FALSE		High	Unambiguous	MAILSDYEEEEHQPQPEK	[-].MAILSDYEEEEHQPQPEK.[K]	1xMet-loss [N-Term]	1xMet-loss [N-Term]	2.41292e-06	5.33751e-05	2.188	1	1	7	731321642	731321642 [1-18]	731321642 1xMet-loss [N-Term]	731321642 1xMet-loss [N-Term]	PREDICTED: protein BOBBER 1 [Beta vulgaris subsp. vulgaris]	731321642	0	2041.93	18	77.2	119.5	199.6	77.7	99.2	40.8	74	83.5	93	135.6	2.36754e+06	7.44317e+06	7688250	2.46006e+06	1.20451e+06	2.09232e+06	1.94527e+06	3.0928e+06	4.22154e+06	5.92753e+06	4.81147e+06	7.44317e+06	1.24339e+07	4.83725e+06	6.17943e+06		2.54136e+06
FALSE		High	Unambiguous	MALMAQDTTPIVLNVTR	[-].MALMAQDTTPIVLNVTR.[GA]	1xOxidation [M4]; 1xMet-loss+Acetyl [N-Term]	1xOxidation [M4]; 1xMet-loss+Acetyl [N-Term]	3.35501e-06	5.33751e-05	2.117	3	3	6	731355469; 731355467; 731355472	731355469 [1-17]; 731355467 [1-17]; 731355472 [1-17]	731355469 1xMet-loss+Acetyl [N-Term]; 731355467 1xMet-loss+Acetyl [N-Term]; 731355472 1xMet-loss+Acetyl [N-Term]	731355469 1xMet-loss+Acetyl [N-Term]; 731355467 1xMet-loss+Acetyl [N-Term]; 731355472 1xMet-loss+Acetyl [N-Term]	PREDICTED: benzyl alcohol O-benzoyltransferase [Beta vulgaris subsp. vulgaris] PREDICTED: benzyl alcohol O-benzoyltransferase [Beta vulgaris subsp. vulgaris] PREDICTED: benzyl alcohol O-benzoyltransferase [Beta vulgaris subsp. vulgaris]	731355469; 731355467; 731355472	0	1800.95	17					207.2	76.6	14.7		27.9	673.6					145417	227152	22270.7		73153.3	1.70223e+06					746031		275902
FALSE		High	Unambiguous	MAMVDEPLYPIAVLIDELKNEDIQLR	[-].MAMVDEPLYPIAVLIDELKNEDIQLR.[L]	1xMet-loss+Acetyl [N-Term]	1xMet-loss+Acetyl [N-Term]	2.11663e-08	5.33751e-05	3.207	1	1	11	731333931	731333931 [1-26]	731333931 1xMet-loss+Acetyl [N-Term]	731333931 1xMet-loss+Acetyl [N-Term]	PREDICTED: serine/threonine-protein phosphatase 2A 65 kDa regulatory subunit A beta isoform [Beta vulgaris subsp. vulgaris]	731333931	1	2939.54	26	166.7	40.6	67.3	11.1	356.1	35.8		225.9	43.5	52.9	4.08329e+06	2.02302e+06	2.07075e+06	280782	3.45534e+06	1.46538e+06		6.68499e+06	1.57845e+06	1.84881e+06	8.29832e+06	2.02302e+06	3.34894e+06	552107	1.77268e+07		1.77987e+06
FALSE		High	Unambiguous	MAMQAESPAATPSAQVVGNAFVEQYYLILHQSPELVFR	[-].MAMQAESPAATPSAQVVGNAFVEQYYLILHQSPELVFR.[F]	1xMet-loss+Acetyl [N-Term]	1xMet-loss+Acetyl [N-Term]	1.417e-07	5.33751e-05	2.798	1	1	17	731366736	731366736 [1-38]	731366736 1xMet-loss+Acetyl [N-Term]	731366736 1xMet-loss+Acetyl [N-Term]	PREDICTED: ras GTPase-activating protein-binding protein 1 [Beta vulgaris subsp. vulgaris]	731366736	0	4104.05	38		193.5	83.5	101.6	39		73.4	280.8	117.8	110.4		7534163	2.01004e+06	2.01096e+06	295809		1.20668e+06	6.49879e+06	3.3435e+06	3.01702e+06		7534163	3.25076e+06	3.95418e+06	1.51758e+06
FALSE		High	Unambiguous	MAMPTINFAELEGAKR	[-].MAMPTINFAELEGAKR.[N]	1xMet-loss+Acetyl [N-Term]	1xMet-loss+Acetyl [N-Term]	1.9426e-05	5.33751e-05	1.737	1	1	3	731375690	731375690 [1-16]	731375690 1xMet-loss+Acetyl [N-Term]	731375690 1xMet-loss+Acetyl [N-Term]	PREDICTED: 1-aminocyclopropane-1-carboxylate oxidase 1 [Beta vulgaris subsp. vulgaris]	731375690	1	1689.86	16	269.7	196.5	12	64.3	55.7			185.6	143.9	72.5	1.68596e+06	2.49613e+06	94146.3	415213	137987			1401572	1.33304e+06	646209	3.42631e+06	2.49613e+06	152259	816440	707908
FALSE		High	Unambiguous	MAMPTINFAELEGAK	[-].MAMPTINFAELEGAK.[R]	1xMet-loss+Acetyl [N-Term]	1xMet-loss+Acetyl [N-Term]	2.61432e-05	5.33751e-05	1.672	1	1	3	731375690	731375690 [1-15]	731375690 1xMet-loss+Acetyl [N-Term]	731375690 1xMet-loss+Acetyl [N-Term]	PREDICTED: 1-aminocyclopropane-1-carboxylate oxidase 1 [Beta vulgaris subsp. vulgaris]	731375690	0	1533.76	15		497.4	19.6		133.2			335.8		14		5.50035e+06	134138		287188			2.2072e+06		108476		5.50035e+06	216936		1.47335e+06
FALSE		High	Unambiguous	MAMLQGVNEIAEAVKVTMGPR	[R].MAMLQGVNEIAEAVKVTMGPR.[G]			8.03652e-08	5.33751e-05	2.92	1	1	6	731348235	731348235 [41-61]			PREDICTED: chaperonin CPN60-like 2, mitochondrial [Beta vulgaris subsp. vulgaris]	731348235	1	2245.15	21	495.9	32.7		128.1	82.3	12.3	136.5	39.3	67.9	5	1.26954e+07	1.70254e+06		3.39078e+06	834959	525258	2.9961e+06	1.21402e+06	2.576e+06	183471	2.58005e+07	1.70254e+06		6.66735e+06	4.28356e+06		637986
FALSE		High	Unambiguous	MAMLQGVNEIAEAVK	[R].MAMLQGVNEIAEAVK.[V]			1.75947e-06	5.33751e-05	2.256	1	1	12	731348235	731348235 [41-55]			PREDICTED: chaperonin CPN60-like 2, mitochondrial [Beta vulgaris subsp. vulgaris]	731348235	0	1603.82	15	155.3	136	4.3	146.8	104	76.3	35	117.6	158.5	66.1	4.13619e+06	7.36265e+06	145221	4.04283e+06	1.09742e+06	3.40052e+06	799433	3.78402e+06	6.25562e+06	2.51311e+06	8.40583e+06	7.36265e+06	234861	7.94949e+06	5.63005e+06		4.13033e+06
FALSE		High	Unambiguous	MAMAWLVAGCR	[R].MAMAWLVAGCR.[A]	1xCarbamidomethyl [C10]	1xCarbamidomethyl [C10]	1.83021e-05	5.33751e-05	1.75	1	1	6	731331565	731331565 [145-155]			PREDICTED: metacaspase-1 [Beta vulgaris subsp. vulgaris]	731331565	0	1265.6	11			47.5			69.1	40.4	464.4	268	110.6			433143			837770	251277	4.06696e+06	2.87845e+06	1.14377e+06			700504				1.01757e+06
FALSE		High	Unambiguous	MALVLHSGLPNKNAYK	[-].MALVLHSGLPNKNAYK.[A]	1xMet-loss+Acetyl [N-Term]	1xMet-loss+Acetyl [N-Term]	5.93122e-07	5.33751e-05	2.49	1	1	67	731313935	731313935 [1-16]	731313935 1xMet-loss+Acetyl [N-Term]	731313935 1xMet-loss+Acetyl [N-Term]	PREDICTED: elongation factor 1-gamma 2 [Beta vulgaris subsp. vulgaris]	731313935	1	1666.93	16	130.9	103.5	31.1	130.4	165.4	58.3	111	83.3	79.3	106.8	5.28399e+07	8.491e+07	1.57868e+07	5.44241e+07	2.6459e+07	3.93821e+07	3.84522e+07	4.06476e+07	4.74134e+07	6.15307e+07	1.07385e+08	8.491e+07	2.55313e+07	1.07015e+08	1.35742e+08		4.78341e+07
FALSE		High	Unambiguous	MALMAQDTTPIVLNVTR	[-].MALMAQDTTPIVLNVTR.[GA]	1xMet-loss+Acetyl [N-Term]	1xMet-loss+Acetyl [N-Term]	1.49543e-06	5.33751e-05	2.291	3	3	96	731355469; 731355467; 731355472	731355469 [1-17]; 731355467 [1-17]; 731355472 [1-17]	731355469 1xMet-loss+Acetyl [N-Term]; 731355467 1xMet-loss+Acetyl [N-Term]; 731355472 1xMet-loss+Acetyl [N-Term]	731355469 1xMet-loss+Acetyl [N-Term]; 731355467 1xMet-loss+Acetyl [N-Term]; 731355472 1xMet-loss+Acetyl [N-Term]	PREDICTED: benzyl alcohol O-benzoyltransferase [Beta vulgaris subsp. vulgaris] PREDICTED: benzyl alcohol O-benzoyltransferase [Beta vulgaris subsp. vulgaris] PREDICTED: benzyl alcohol O-benzoyltransferase [Beta vulgaris subsp. vulgaris]	731355469; 731355467; 731355472	0	1784.96	17	291.3	207.6	5.9	80.3	33.3	31.6	40.1	135.5	126.4	48	2.5413e+07	3.68094e+07	647212	7.23663e+06	1.15141e+06	4.61833e+06	2.99935e+06	1.42806e+07	1.63427e+07	5.97147e+06	5.16458e+07	3.68094e+07	1.04671e+06	1.42295e+07	5.90705e+06		5.6095e+06
FALSE		High	Unambiguous	MALVLHSGLPNK	[-].MALVLHSGLPNK.[N]	1xMet-loss+Acetyl [N-Term]	1xMet-loss+Acetyl [N-Term]	2.13848e-06	5.33751e-05	2.214	1	1	34	731313935	731313935 [1-12]	731313935 1xMet-loss+Acetyl [N-Term]	731313935 1xMet-loss+Acetyl [N-Term]	PREDICTED: elongation factor 1-gamma 2 [Beta vulgaris subsp. vulgaris]	731313935	0	1190.69	12	37	57.5	35.3	32.5	59	185.4	152.9	147.1	98.8	194.4	6.37183e+06	2.01159e+07	7.63238e+06	5.77644e+06	4.02127e+06	5.33573e+07	2.25479e+07	3.05743e+07	2.51769e+07	4.76959e+07	1.29492e+07	2.01159e+07	1.23435e+07	1.13583e+07	2.06302e+07		6.48086e+07
FALSE		High	Unambiguous	MALVLHAGNTNK	[-].MALVLHAGNTNK.[N]	1xMet-loss+Acetyl [N-Term]	1xMet-loss+Acetyl [N-Term]	5.53655e-06	5.33751e-05	2.009	1	1	20	731314510	731314510 [1-12]	731314510 1xMet-loss+Acetyl [N-Term]	731314510 1xMet-loss+Acetyl [N-Term]	PREDICTED: elongation factor 1-gamma [Beta vulgaris subsp. vulgaris]	731314510	0	1179.65	12	162.8	85.2	7.8	50.1	86.6	110.7	132.8	72.5	142.3	149.2	1.6365e+07	1.74023e+07	988874	5.20844e+06	3.44762e+06	1.86177e+07	1.14492e+07	8.80813e+06	2.11986e+07	2.13986e+07	3.3258e+07	1.74023e+07	1.59927e+06	1.02414e+07	1.76872e+07		2.26134e+07
FALSE		High	Unambiguous	MALVATAEVCDANSHLIQSGELR	[-].MALVATAEVCDANSHLIQSGELR.[A]	1xCarbamidomethyl [C10]; 1xMet-loss+Acetyl [N-Term]	1xCarbamidomethyl [C10]; 1xMet-loss+Acetyl [N-Term]	8.76374e-10	5.33751e-05	3.892	1	1	38	1108906996	1108906996 [1-23]	1108906996 1xMet-loss+Acetyl [N-Term]	1108906996 1xMet-loss+Acetyl [N-Term]	PREDICTED: putative 4-hydroxy-4-methyl-2-oxoglutarate aldolase 2 [Beta vulgaris subsp. vulgaris]	1108906996	0	2396.19	23	34.7	184.4	2.8	132	27.8	39.2	30.1	282.5	133.5	133.1	2.60279e+06	2.81297e+07	260880	1.02381e+07	825684	4.92096e+06	1.94004e+06	2.56086e+07	1.48439e+07	1.42464e+07	5.28956e+06	2.81297e+07	421911	2.01314e+07	4.23598e+06		5.97707e+06
FALSE		High	Unambiguous	MAISPETLQFLSQCFLNTLSPHPEPR	[-].MAISPETLQFLSQCFLNTLSPHPEPR.[R]	1xCarbamidomethyl [C14]; 1xMet-loss+Acetyl [N-Term]	1xCarbamidomethyl [C14]; 1xMet-loss+Acetyl [N-Term]	4.76727e-07	5.33751e-05	2.537	1	1	13	731343854	731343854 [1-26]	731343854 1xMet-loss+Acetyl [N-Term]	731343854 1xMet-loss+Acetyl [N-Term]	PREDICTED: exportin-2 [Beta vulgaris subsp. vulgaris]	731343854	0	2924.46	26	45.5	88.7	149.8	51.9	209.7	35.9	72.5	149.5	79.9	116.4	2473104	9.80389e+06	1.02331e+07	2.91771e+06	4.51643e+06	3.26961e+06	3.3809e+06	9.81691e+06	6.43466e+06	9026685	5.026e+06	9.80389e+06	1.65495e+07	5.73715e+06	2.31705e+07		3.97132e+06
FALSE		High	Unambiguous	MALQHSFPDYPQMIMGAIEELNEKEGSSK	[-].MALQHSFPDYPQMIMGAIEELNEKEGSSK.[E]	1xMet-loss+Acetyl [N-Term]	1xMet-loss+Acetyl [N-Term]	1.53058e-06	5.33751e-05	2.286	1	1	6	731326089	731326089 [1-29]	731326089 1xMet-loss+Acetyl [N-Term]	731326089 1xMet-loss+Acetyl [N-Term]	PREDICTED: HMG-Y-related protein A [Beta vulgaris subsp. vulgaris]	731326089	1	3191.5	29	18.8	75.8	103.8			202.5	279	93.8	155	71.2	272424	2.23447e+06	1.8916e+06			4.91405e+06	3.46944e+06	1.64418e+06	3.33128e+06	1.47314e+06	553636	2.23447e+06	3.05921e+06				5.96868e+06
FALSE		High	Unambiguous	MANTTGLDEETASKVLR	[-].MANTTGLDEETASKVLR.[Q]	1xGG [K/S]; 1xMet-loss+Acetyl [N-Term]	1xGG [S13; K14]; 1xMet-loss+Acetyl [N-Term]	0.00016128	9.51359e-05	1.249	1	1	2	731317156	731317156 [1-17]	731317156 1xMet-loss+Acetyl [N-Term]	731317156 1xMet-loss+Acetyl [N-Term]	PREDICTED: la protein 1 [Beta vulgaris subsp. vulgaris]	731317156	1	1860.93	17
FALSE		High	Unambiguous	MALPQIEDIVR	[K].MALPQIEDIVR.[A]			3.65565e-05	5.33751e-05	1.598	1	1	12	731343016	731343016 [345-355]			PREDICTED: pyruvate dehydrogenase E1 component subunit beta-1, mitochondrial-like [Beta vulgaris subsp. vulgaris]	731343016	0	1284.7	11	306.5	184.2	22.7	87.9	42.9	117.7	32.3	70.4	89.2	46.1	8.36451e+06	10212010	778612	2.47852e+06	463993	5.37348e+06	756095	2.32157e+06	3.60619e+06	1.79538e+06	1.69989e+07	10212010	1.25922e+06	4.87356e+06	2.38041e+06		6.52672e+06
FALSE		High	Unambiguous	MALPNQQTVDYPSFK	[-].MALPNQQTVDYPSFK.[L]	1xMet-loss+Acetyl [N-Term]	1xMet-loss+Acetyl [N-Term]	1.83021e-05	5.33751e-05	1.75	1	1	34	731320227	731320227 [1-15]	731320227 1xMet-loss+Acetyl [N-Term]	731320227 1xMet-loss+Acetyl [N-Term]	PREDICTED: GTP-binding nuclear protein Ran-3 [Beta vulgaris subsp. vulgaris]	731320227	0	1649.82	15	213.4	179.1	7.6	43.9	60.9	78.6	64	115.9	111.4	125.1	7.07609e+07	120711111	3.14748e+06	1.50461e+07	7.9996e+06	4.36085e+07	1.81975e+07	4.64365e+07	5.47458e+07	5.91861e+07	1.43805e+08	120711111	5.09028e+06	2.95854e+07	4.10401e+07		5.29676e+07
FALSE		High	Unambiguous	MAIPLLVPHMNLHNAK	[R].MAIPLLVPHMNLHNAK.[L]			8.28308e-06	5.33751e-05	1.922	1	1	30	731349413	731349413 [369-384]			PREDICTED: trans-cinnamate 4-monooxygenase [Beta vulgaris subsp. vulgaris]	731349413	0	1798.98	16	37.2	93.2	174.1	121	194.8	87.7	114.8	63.1	80.8	33.4	3.48574e+06	1.7751e+07	2.05088e+07	1.17274e+07	7.23213e+06	1.37519e+07	9.22504e+06	7.14269e+06	11215597	4.46942e+06	7.08394e+06	1.7751e+07	3.31681e+07	2.30599e+07	3.71028e+07		1.67032e+07
FALSE		High	Unambiguous	MALVLHAGNTNKNAFK	[-].MALVLHAGNTNKNAFK.[A]	1xMet-loss+Acetyl [N-Term]	1xMet-loss+Acetyl [N-Term]	8.71536e-06	5.33751e-05	1.911	1	1	11	731314510	731314510 [1-16]	731314510 1xMet-loss+Acetyl [N-Term]	731314510 1xMet-loss+Acetyl [N-Term]	PREDICTED: elongation factor 1-gamma [Beta vulgaris subsp. vulgaris]	731314510	1	1639.89	16	375.6	4.3	24.3	183.4	23.9	40	75.9	121.2	73.5	77.8	1.28669e+07	299340	1.04507e+06	6.49384e+06	324772	2.2949e+06	2.22941e+06	5.01508e+06	3.73249e+06	3.8015e+06	2.61489e+07	299340	1.69014e+06	1.27689e+07	1.66617e+06		2.78742e+06
FALSE		High	Unambiguous	MAQDSSISIDNPK	[-].MAQDSSISIDNPK.[S]	1xMet-loss+Acetyl [N-Term]	1xMet-loss+Acetyl [N-Term]	2.40838e-05	5.33751e-05	1.69	1	2	2	731362354	731362354 [1-13]	731362354 1xMet-loss+Acetyl [N-Term]	731362354 1xMet-loss+Acetyl [N-Term]	PREDICTED: 4-coumarate--CoA ligase-like 5 isoform X1 [Beta vulgaris subsp. vulgaris]	731362354; 1108785549	0	1316.63	13	373.3	218	26.9				23.6	95.5	75.9	186.9	1.22494e+06	1453553	110843				66400.9	378444	368866	875012	2.4894e+06	1453553	179262
FALSE		High	Unambiguous	MAATSAMESVPATALR	[-].MAATSAMESVPATALR.[S]	1xMet-loss+Acetyl [N-Term]	1xMet-loss+Acetyl [N-Term]	7.47477e-05	5.33751e-05	1.436	1	2	9	731352072	731352072 [1-16]	731352072 1xMet-loss+Acetyl [N-Term]	731352072 1xMet-loss+Acetyl [N-Term]	PREDICTED: proline synthase co-transcribed bacterial homolog protein isoform X1 [Beta vulgaris subsp. vulgaris]	731352074; 731352072	0	1517.76	16	115.7	307	6.1	23.5	3.9	88.4	86	132.5	96	141	1.77697e+06	9584834	116943	372869	23935.7	2.272e+06	1.13256e+06	2.45874e+06	2.1854e+06	3.09092e+06	3.61127e+06	9584834	189127	733179	122796		2.75961e+06
FALSE		High	Unambiguous	MAATATLSSVEAEKLEKLR	[-].MAATATLSSVEAEKLEKLR.[S]	1xMet-loss+Acetyl [N-Term]	1xMet-loss+Acetyl [N-Term]	2.81473e-09	5.33751e-05	3.641	1	1	76	731366257	731366257 [1-19]	731366257 1xMet-loss+Acetyl [N-Term]	731366257 1xMet-loss+Acetyl [N-Term]	PREDICTED: UTP--glucose-1-phosphate uridylyltransferase [Beta vulgaris subsp. vulgaris]	731366257	2	1959.08	19	294.5	108.1	3.6	181.8	138.6	5	67.7	98.5	58.7	43.6	8.86891e+07	6.61258e+07	1.34525e+06	5.65898e+07	1.65367e+07	2.49635e+06	1.7476e+07	3.58324e+07	2.61727e+07	1.87297e+07	1.8024e+08	6.61258e+07	2.17561e+06	1.11273e+08	8.48379e+07		3.0321e+06
FALSE		High	Unambiguous	LYHMEIALGHYK	[K].LYHMEIALGHYK.[N]			1.77589e-06	5.33751e-05	2.254	1	1	14	731319214	731319214 [214-225]			PREDICTED: glutathione S-transferase DHAR3, chloroplastic [Beta vulgaris subsp. vulgaris]	731319214	0	1474.75	12	10.9	52.1	37.1	35.3	335.9	144.8	41.5	174.7	60.8	106.9	564422	5.468e+06	2.40692e+06	1.88466e+06	6.87822e+06	1.25266e+07	1.84112e+06	1.09114e+07	4.65596e+06	7.88081e+06	1.14705e+06	5.468e+06	3.89262e+06	3.70583e+06	3.52871e+07		1.5215e+07
FALSE		High	Unambiguous	LYHLSPIEDLELAMTLKR	[K].LYHLSPIEDLELAMTLKR.[V]	1xOxidation [M14]	1xOxidation [M14]	3.82394e-05	5.33751e-05	1.588	1	1	5	731338711	731338711 [166-183]			PREDICTED: salicylic acid-binding protein 2 [Beta vulgaris subsp. vulgaris]	731338711	1	2158.16	18	30.6	82.8	6.7	5.8	75.3	130.5	156.7	39.4	83.7	388.5	431589	2.3715e+06	118007	84669.4	420443	3.0772e+06	1.89323e+06	670519	1.74794e+06	7.80833e+06	877101	2.3715e+06	190848	166487	2.15698e+06		3.73762e+06
FALSE		High	Unambiguous	LYHLSPIEDLELAMTLKR	[K].LYHLSPIEDLELAMTLKR.[V]			3.92695e-11	5.33751e-05	4.56	1	1	64	731338711	731338711 [166-183]			PREDICTED: salicylic acid-binding protein 2 [Beta vulgaris subsp. vulgaris]	731338711	1	2142.16	18	149	116.9	140.9	98.8	31.8	102.2	149.3	25.1	139.8	46.2	3.3955e+07	5.41369e+07	4.03492e+07	2.32839e+07	2.87292e+06	3.89874e+07	2.91849e+07	6.9205e+06	4.7199e+07	1.50336e+07	6.90055e+07	5.41369e+07	6.52552e+07	4.57835e+07	1.47389e+07		4.73547e+07
FALSE		High	Unambiguous	LYHLSPIEDLELAMTLK	[K].LYHLSPIEDLELAMTLK.[R]			2.01745e-07	5.33751e-05	2.722	1	1	25	731338711	731338711 [166-182]			PREDICTED: salicylic acid-binding protein 2 [Beta vulgaris subsp. vulgaris]	731338711	0	1986.06	17	123.1	73.8	123.1	68.3	14.6	147.9	121.4	110	185.9	32	7.73777e+06	9.43129e+06	9.72355e+06	4.43567e+06	363556	1.55636e+07	6.54582e+06	8.35488e+06	1.73155e+07	2.86546e+06	1.57252e+07	9.43129e+06	1.57255e+07	8.72194e+06	1.86514e+06		1.89038e+07
FALSE		High	Unambiguous	LYHLEIALGHFKK	[K].LYHLEIALGHFKK.[W]			4.20183e-05	5.33751e-05	1.567	1	1	13	731362896	731362896 [157-169]			PREDICTED: glutathione S-transferase DHAR2 [Beta vulgaris subsp. vulgaris]	731362896	1	1568.89	13	13.2	48.4	2.4	72.1	11.1	112.3	22.6	375.4	161.7	181	280779	2.09778e+06	64144.3	1.59023e+06	93782.2	4.009e+06	412963	9.67698e+06	5.11227e+06	5.50924e+06	570617	2.09778e+06	103738	3.1269e+06	481128		4.8694e+06
FALSE		High	Unambiguous	LYHLDLGMNSLTGPIPEEIFK	[K].LYHLDLGMNSLTGPIPEEIFK.[L]			7.65657e-06	5.33751e-05	1.939	1	2	24	731323970	731323970 [132-152]			PREDICTED: polygalacturonase inhibitor 1 [Beta vulgaris subsp. vulgaris]	731323970; 731323972	0	2387.23	21	255.5	135		104.7	18.2	85.8	90.3	86.8	177.5	46.1	8.67497e+06	9315045		3.67519e+06	244702	4.8761e+06	2.62756e+06	3.56059e+06	8.92546e+06	2.23346e+06	1.76298e+07	9315045		7.22659e+06	1.25539e+06		5.92259e+06
FALSE		High	Unambiguous	IYGVKDEVYPEGTHFMIPWFERPVIYDVR	[R].IYGVKDEVYPEGTHFMIPWFERPVIYDVR.[A]			8.5671e-05	5.33751e-05	1.404	1	1	14	731326049	731326049 [53-81]			PREDICTED: prohibitin-1, mitochondrial [Beta vulgaris subsp. vulgaris]	731326049	1	3555.78	29	58.4	62	174.5	254.7		65.7	6	6.8	354.2	17.7	1.13719e+06	2.45314e+06	4267028	5.12321e+06		2.14055e+06	99471	159683	1.02151e+07	492120	2.31107e+06	2.45314e+06	6.90089e+06	1.00739e+07			2.59994e+06
FALSE		High	Unambiguous	IYGVGVWLLSR	[K].IYGVGVWLLSR.[V]			6.9766e-05	5.33751e-05	1.452	1	1	3	731347862	731347862 [85-95]			PREDICTED: uncharacterized protein C23H3.12c [Beta vulgaris subsp. vulgaris]	731347862	0	1262.73	11		15.5	17.9	83.9			9.6	515.4	186.1	171.6		191054	136971	527354			49859.7	3.78433e+06	1.676e+06	1.48793e+06		191054	221517	1.03694e+06
FALSE		High	Unambiguous	IYKEFGITKEAVVEAAK	[K].IYKEFGITKEAVVEAAK.[S]			3.28681e-07	5.33751e-05	2.617	1	1	41	731362582	731362582 [721-737]			PREDICTED: transketolase, chloroplastic [Beta vulgaris subsp. vulgaris]	731362582	2	1896.05	17	236.3	98.7	0.6	197.1	260.4	8	32.9	73.5	45.7	46.7	3.14719e+07	2.67012e+07	101735	2.71262e+07	1.37342e+07	1.78332e+06	3.76191e+06	1.18274e+07	9.02489e+06	8.87837e+06	6.39591e+07	2.67012e+07	164532	5.33388e+07	7.046e+07		2.16604e+06
FALSE		High	Unambiguous	IYGTWASPFSMR	[K].IYGTWASPFSMR.[V]			1.19861e-05	5.33751e-05	1.842	1	1	11	731364397	731364397 [5-16]			PREDICTED: glutathione S-transferase U7 [Beta vulgaris subsp. vulgaris]	731364397	0	1415.68	12	82.6	85.2	83.1	223.7	245.6	19.6	41	66.3	86.2	66.8	2.56592e+06	5.37864e+06	3.24314e+06	7.18258e+06	3.02323e+06	1.01866e+06	1.09258e+06	2.48798e+06	3.96912e+06	2.96224e+06	5.21463e+06	5.37864e+06	5.245e+06	1.41232e+07	1.551e+07		1.23728e+06
FALSE		High	Unambiguous	LYGSDAGHSWVARPVTGQSMLGLASR	[K].LYGSDAGHSWVARPVTGQSMLGLASR.[Q]			3.965e-06	5.33751e-05	2.081	1	1	6	731358111	731358111 [259-284]			PREDICTED: monosaccharide-sensing protein 2 [Beta vulgaris subsp. vulgaris]	731358111	0	2716.36	26	120.8	162.9	9.7	126.8	297.8	52.6	17.5	69.1	91.3	51.4	1.51172e+06	4.14209e+06	151921	1.6397e+06	1.47561e+06	1.10144e+06	187318	1.04454e+06	1.69269e+06	917066	3.07221e+06	4.14209e+06	245695	3.22418e+06	7.57028e+06		1.33782e+06
FALSE		High	Unambiguous	LYGMWASPYVLR	[K].LYGMWASPYVLR.[V]			7.22182e-05	5.33751e-05	1.444	1	2	3	731335047	731335047 [10-21]			PREDICTED: glutathione S-transferase U9 [Beta vulgaris subsp. vulgaris]	731335041; 731335047	0	1455.75	12	96.1	84.1	56.3	294.8	123	198.9				146.8	687975	1.22416e+06	506254	2.18172e+06	349064	2.38375e+06				1.49947e+06	1.39815e+06	1.22416e+06	818743	4.28996e+06	1.79079e+06		2.89535e+06
FALSE		High	Unambiguous	LYGLAPVCQFLTK	[R].LYGLAPVCQFLTK.[N]	1xCarbamidomethyl [C8]	1xCarbamidomethyl [C8]	1.11847e-05	5.33751e-05	1.857	1	1	37	731321402	731321402 [102-114]			PREDICTED: caffeic acid 3-O-methyltransferase [Beta vulgaris subsp. vulgaris]	731321402	0	1509.81	13	39.5	142	62.5	142.6	132.2	89.7	78.1	87.9	120.1	105.2	5.30879e+06	3.87623e+07	1.05525e+07	1.97991e+07	7.03491e+06	2.01663e+07	8.99899e+06	1.42634e+07	2.3894e+07	2.01591e+07	1.07889e+07	3.87623e+07	1.70661e+07	3.89312e+07	3.6091e+07		2.44943e+07
FALSE		High	Unambiguous	IYGGVAGLYDYGPPGCAVK	[K].IYGGVAGLYDYGPPGCAVK.[Q]	1xCarbamidomethyl [C16]	1xCarbamidomethyl [C16]	7.49522e-08	5.33751e-05	2.935	1	1	9	731374597	731374597 [152-170]			PREDICTED: glycine--tRNA ligase, mitochondrial 1-like [Beta vulgaris subsp. vulgaris]	731374597	0	1956.95	19	173.1	52.4	7.3	266	79.2	105.6	34.1	143.3	57.9	81.1	4488210	2.76255e+06	238249	7.12656e+06	813535	4.58108e+06	757654	4.48727e+06	2.22473e+06	2.99986e+06	9.12122e+06	2.76255e+06	385310	1.40131e+07	4.17365e+06		5.56426e+06
FALSE		High	Unambiguous	LYEPIKELLSEENPPLYR	[R].LYEPIKELLSEENPPLYR.[A]			7.01196e-06	5.33751e-05	1.958	1	1	21	731362632	731362632 [337-354]			PREDICTED: 1-aminocyclopropane-1-carboxylate oxidase homolog 1 [Beta vulgaris subsp. vulgaris]	731362632	1	2203.16	18	155.1	42.2	38.7	169.6	307.8	75.9	52.8	49.5	57.6	51	9.86353e+06	5.44773e+06	3.09145e+06	1.11474e+07	7753120	8.07413e+06	2.87823e+06	3.80097e+06	5.42558e+06	4.62692e+06	2.00453e+07	5.44773e+06	4.99967e+06	2.19193e+07	3.97756e+07		9.80697e+06
FALSE		High	Unambiguous	IYEMMGMALSNK	[K].IYEMMGMALSNK.[W]			3.67216e-05	5.33751e-05	1.597	1	1	16	731371136	731371136 [742-753]			PREDICTED: heat shock protein 90-6, mitochondrial [Beta vulgaris subsp. vulgaris]	731371136	0	1387.64	12	231.5	86.9	33.9	36.5	94.2	59.8	52	157.1	130	118.2	6.69066e+06	5.10429e+06	1.23012e+06	1.08887e+06	1.07896e+06	2.89137e+06	1.28767e+06	5.48504e+06	5.56702e+06	4.87332e+06	1.35972e+07	5.10429e+06	1.98942e+06	2.14107e+06	5.53534e+06		3.5119e+06
FALSE		High	Unambiguous	LYEFVTPADKDQFIAR	[K].LYEFVTPADKDQFIAR.[L]			4.85674e-07	5.33751e-05	2.533	1	1	15	731359455	731359455 [647-662]			PREDICTED: heat shock 70 kDa protein 15 [Beta vulgaris subsp. vulgaris]	731359455	1	1912.98	16	30.1	78.2	52.6	78.4	103	174.2	192.1	93.3	76.4	121.7	588552	3.10594e+06	1.29045e+06	1.58398e+06	796810	5.69494e+06	3.2183e+06	2.2032e+06	2.21167e+06	3.39023e+06	1.19609e+06	3.10594e+06	2.08699e+06	3.1146e+06	4.08785e+06		6.91717e+06
FALSE		High	Unambiguous	IYEEFLAVPVFK	[R].IYEEFLAVPVFK.[G]			4.86262e-06	5.33751e-05	2.037	1	1	31	731364445	731364445 [265-276]			PREDICTED: proline--tRNA ligase, cytoplasmic [Beta vulgaris subsp. vulgaris]	731364445	0	1454.79	12	161.7	176.3	8.5	124.3	55.9	63	117.4	113.2	106.6	73.3	1.26632e+07	2.80698e+07	832883	1.00611e+07	1.73318e+06	8.25166e+06	7.88294e+06	1.07084e+07	1.23741e+07	8.19238e+06	2.5735e+07	2.80698e+07	1.34699e+06	1.97833e+07	8.89166e+06		1.00226e+07
FALSE		High	Unambiguous	IYGSYDEVLDDHEVDAVYIPLPTSLHVEWAVR	[K].IYGSYDEVLDDHEVDAVYIPLPTSLHVEWAVR.[A]			1.05332e-05	5.33751e-05	1.87	1	2	3	731375349	731375349 [67-98]			PREDICTED: uncharacterized oxidoreductase At4g09670 isoform X3 [Beta vulgaris subsp. vulgaris]	731375349; 1108864784	0	3700.82	32	517.6	482.4									1.6982e+06	3.21634e+06									3.4512e+06	3.21634e+06
FALSE		High	Unambiguous	LYEDNEYALYTVTMFSR	[K].LYEDNEYALYTVTMFSR.[V]			2.71126e-05	5.33751e-05	1.664	1	1	19	731363650	731363650 [215-231]			PREDICTED: V-type proton ATPase subunit C [Beta vulgaris subsp. vulgaris]	731363650	0	2114.97	17	22	107.5	15.8	165	19.8	17.6	32.7	332.9	173.1	113.5	443023	4.40115e+06	399768	3.43637e+06	158268	592022	564903	8.10184e+06	5.1677e+06	3.26262e+06	900340	4.40115e+06	646528	6.75698e+06	811955		719079
FALSE		High	Unambiguous	LYKEPIPVTQLVR	[K].LYKEPIPVTQLVR.[E]			0.000101256	5.33751e-05	1.364	1	1	77	731356285	731356285 [100-112]			PREDICTED: proteasome subunit alpha type-2-B [Beta vulgaris subsp. vulgaris]	731356285	1	1555.92	13	145.4	89.9	134.1	96.4	132.6	89.4	54.3	98	77.7	82.2	6.00929e+07	7.55316e+07	6.96249e+07	4.1172e+07	2.16997e+07	6.18092e+07	1.92483e+07	4.89006e+07	4.75854e+07	4.84184e+07	1.22125e+08	7.55316e+07	1.12601e+08	8.09572e+07	1.11325e+08		7.50745e+07
FALSE		High	Unambiguous	LYLDSAFEQKNDIAK	[K].LYLDSAFEQKNDIAK.[A]			1.2668e-05	5.33751e-05	1.83	1	1	2	731344145	731344145 [112-126]			PREDICTED: hypersensitive-induced response protein 2 [Beta vulgaris subsp. vulgaris]	731344145	1	1754.9	15			644.3	15.6	283			0.9		56.3			80460004	1.59939e+06	1.11403e+07			111388		7.97428e+06			1.30125e+08	3.14491e+06	5.71529e+07
FALSE		High	Unambiguous	LYMEARPMEEGLAEAIDEGR	[R].LYMEARPMEEGLAEAIDEGR.[I]	1xOxidation [M]	1xOxidation [M3; M8]	5.47194e-09	5.33751e-05	3.498	1	2	48	731362937	731362937 [587-606]			PREDICTED: elongation factor 2 [Beta vulgaris subsp. vulgaris]	731362937; 733214592	0	2296.06	20	3.1	37.5	12.3	94.4	387.3	108.4	88.8	73.4	38.2	156.7	405922	1.00127e+07	2.0238e+06	1.28073e+07	2.01422e+07	2.38186e+07	9.99289e+06	1.16362e+07	7.42177e+06	2.93525e+07	824939	1.00127e+07	3.273e+06	2.51832e+07	1.03335e+08		2.89305e+07
FALSE		High	Unambiguous	LYMEARPMEEGLAEAIDEGR	[R].LYMEARPMEEGLAEAIDEGR.[I]			9.84379e-10	5.33751e-05	3.867	1	2	131	731362937	731362937 [587-606]			PREDICTED: elongation factor 2 [Beta vulgaris subsp. vulgaris]	731362937; 733214592	0	2280.06	20	85.1	122.2	82.6	138.5	159.2	109.4	71.9	56.3	87.8	86.9	1.10565e+08	3.22728e+08	1.34879e+08	1.86031e+08	8.19519e+07	2.37923e+08	8.01143e+07	8.83423e+07	1.69086e+08	1.6098e+08	2.24697e+08	3.22728e+08	2.18134e+08	3.65796e+08	4.20435e+08		2.88985e+08
FALSE		High	Unambiguous	IYIVYYSMYGHVEK	[K].IYIVYYSMYGHVEK.[L]			1.0582e-05	5.33751e-05	1.869	1	1	24	731370577	731370577 [5-18]			PREDICTED: probable NAD(P)H dehydrogenase (quinone) FQR1-like 1 [Beta vulgaris subsp. vulgaris]	731370577	0	1764.87	14		25.8		95.8	56.9	7.1	36.4	407.1	211.3	159.4		3.09604e+06		5.84176e+06	1.33026e+06	704294	1.84306e+06	2.89994e+07	1.84633e+07	1.34094e+07		3.09604e+06		1.14867e+07	6.82461e+06		855447
FALSE		High	Unambiguous	LYLVMDELADEFGIGTLR	[R].LYLVMDELADEFGIGTLR.[L]			5.91318e-08	5.33751e-05	2.986	1	1	27	731325703	731325703 [141-158]			PREDICTED: sulfite reductase 1 [ferredoxin], chloroplastic [Beta vulgaris subsp. vulgaris]	731325703	0	2055.05	18	90.4	117.4	106.5	88.1	168.6	84.9	39.9	112.7	131.1	60.4	7.0766e+06	1.86752e+07	1.04716e+07	7.12158e+06	5.22638e+06	1.11127e+07	2.67443e+06	1.06515e+07	1.51994e+07	6.74068e+06	1.43815e+07	1.86752e+07	1.69353e+07	1.40033e+07	2.68127e+07		1.34977e+07
FALSE		High	Unambiguous	IYISNLPPDVSIDELRDLFGNIGTVAR	[R].IYISNLPPDVSIDELRDLFGNIGTVAR.[I]			1.17128e-05	5.33751e-05	1.847	1	1	8	731349264	731349264 [319-345]			PREDICTED: transcription initiation factor TFIID subunit 15b [Beta vulgaris subsp. vulgaris]	731349264	1	2987.58	27	49	173.6	306.9	76.1	19.5	56	54	50.5	135.3	79.1	1.81207e+06	13031539	14250375	2.9076e+06	284769	3.46381e+06	1.70981e+06	2.25321e+06	7.40523e+06	4.16692e+06	3.6826e+06	13031539	2.30465e+07	5.71725e+06	1.46094e+06		4.2072e+06
FALSE		High	Unambiguous	LYISNLDYGVSNDDIKELFSEVGDLKR	[K].LYISNLDYGVSNDDIKELFSEVGDLKR.[Y]			1.92259e-09	5.33751e-05	3.723	1	2	33	731349080	731349080 [94-120]			PREDICTED: THO complex subunit 4B isoform X1 [Beta vulgaris subsp. vulgaris]	1108958369; 731349080	2	3102.56	27	190.3	55.6	234.7	80.2	14.2	99	110.5	31.1	145.4	38.9	3.9998e+07	2.37467e+07	6.1988e+07	1.74282e+07	1.18575e+06	3.48095e+07	1.99229e+07	7.89589e+06	4.52864e+07	1.16471e+07	8.12865e+07	2.37467e+07	1.00251e+08	3.42693e+07	6.08323e+06		4.22801e+07
FALSE		High	Unambiguous	IYLSLEGVQEETIEKNIK	[K].IYLSLEGVQEETIEKNIK.[S]			3.20695e-05	5.33751e-05	1.627	1	1	1	731373698	731373698 [85-102]			PREDICTED: calcyclin-binding protein [Beta vulgaris subsp. vulgaris]	731373698	1	2106.13	18		657.1							99.5	243.4		1.86393e+06							205807	484571		1.86393e+06
FALSE		High	Unambiguous	LYLSEQTDGSVPNTLVIANCEIVKPR	[R].LYLSEQTDGSVPNTLVIANCEIVKPR.[V]	1xCarbamidomethyl [C20]	1xCarbamidomethyl [C20]	9.91847e-05	5.33751e-05	1.369	1	1	1	731375151	731375151 [111-136]			PREDICTED: WD-40 repeat-containing protein MSI4 [Beta vulgaris subsp. vulgaris]	731375151	0	2916.51	26		226.6		197.3				349.9	82.1	144.1		1.00606e+06		445402				923572	265800	448998		1.00606e+06		875801
FALSE		High	Unambiguous	IYKEYGITAEAVIEAAK	[K].IYKEYGITAEAVIEAAK.[S]			0.00010379	5.33751e-05	1.358	1	1	7	731322609	731322609 [720-736]			PREDICTED: transketolase, chloroplastic [Beta vulgaris subsp. vulgaris]	731322609	1	1869	17	126.3	135.1		190.6	259.6	98	20.4	71.1	41.9	57.1	2.50612e+06	5.44828e+06		3.90956e+06	2.04099e+06	3.25326e+06	346913	1.70434e+06	1.23129e+06	1.61647e+06	5.09308e+06	5.44828e+06		7.68743e+06	1.04708e+07		3.95147e+06
FALSE		High	Unambiguous	LYLSDNHLSGIIPTSLFQSMTSLSELGLFNNR	[R].LYLSDNHLSGIIPTSLFQSMTSLSELGLFNNR.[I]			1.37634e-05	5.33751e-05	1.812	1	1	4	731337519	731337519 [160-191]			PREDICTED: probable leucine-rich repeat receptor-like protein kinase At1g35710 [Beta vulgaris subsp. vulgaris]	731337519	0	3567.82	32								755.2		244.8								2.32381e+06		889456
FALSE		High	Unambiguous	LYIQTMDPNDEDKFDFDPLDMTK	[K].LYIQTMDPNDEDKFDFDPLDMTK.[T]			1.37803e-07	5.33751e-05	2.804	1	1	31	731361773	731361773 [269-291]			PREDICTED: catalase [Beta vulgaris subsp. vulgaris]	731361773	1	2791.25	23	118.9	113	78	112.7	65	58.3	81.7	141.4	146.5	84.6	1.52881e+07	2.95352e+07	1.26111e+07	1.49805e+07	3.31037e+06	1.25533e+07	9.00863e+06	2.19793e+07	27915700	1.55184e+07	3.10693e+07	2.95352e+07	2.03955e+07	2.94565e+07	1.69831e+07		1.52475e+07
FALSE		High	Unambiguous	LYIPQKEFPGYNFIGLIIGPR	[K].LYIPQKEFPGYNFIGLIIGPR.[G]			1.35013e-06	5.33751e-05	2.313	1	1	5	731339031	731339031 [258-278]			PREDICTED: branchpoint-bridging protein [Beta vulgaris subsp. vulgaris]	731339031	1	2435.35	21	207	19.7		105.2	217.3			366.6	65.9	18.3	1.87956e+06	363751		987360	781768			4.02144e+06	887023	237186	3.81975e+06	363751		1.94146e+06	4.01068e+06
FALSE		High	Unambiguous	LYLNVLNEYPQIHSFSAFNSIYNTTGLFGIQATTGSDFVTK	[R].LYLNVLNEYPQIHSFSAFNSIYNTTGLFGIQATTGSDFVTK.[A]			1.34387e-06	5.33751e-05	2.314	1	2	15	731354052	731354052 [355-395]			PREDICTED: mitochondrial-processing peptidase subunit alpha isoform X1 [Beta vulgaris subsp. vulgaris]	731354054; 731354052	0	4571.28	41	276.2	177.7		3.7			6.5	284.3	195.6	55.9	5309242	6.9425e+06		73142.9			107474	6.60052e+06	5569550	1.53344e+06	1.07898e+07	6.9425e+06		143822
FALSE		High	Unambiguous	IYLLAVGYYR	[K].IYLLAVGYYR.[S]			0.000111725	5.33751e-05	1.34	1	1	15	731324457	731324457 [93-102]			PREDICTED: mitochondrial fission 1 protein A [Beta vulgaris subsp. vulgaris]	731324457	0	1230.69	10		13.2	16.4	224.5	88.6	5.8	43.1	338.5	163.2	106.6		746917	573046	6.45168e+06	976296	268647	1.02655e+06	1.13688e+07	6.72432e+06	4.22784e+06		746917	926764	1.2686e+07	5.00866e+06		326303
FALSE		High	Unambiguous	IYLESIGLPDREEGDLGPVYGFQWR	[K].IYLESIGLPDREEGDLGPVYGFQWR.[H]			2.05094e-06	5.33751e-05	2.223	1	1	2	1108972443	1108972443 [324-348]			PREDICTED: bifunctional dihydrofolate reductase-thymidylate synthase 1 [Beta vulgaris subsp. vulgaris]	1108972443	1	2909.45	25	211.2	64.9	79	371.3		84.4	56.5			132.7	879694	549329	413347	1.59848e+06		588420	201736			788197	1.78777e+06	549329	668488	3.14311e+06			714705
FALSE		High	Unambiguous	LYIEQYENDSSKTGRDSQEALKPLVDVALK	[R].LYIEQYENDSSKTGRDSQEALKPLVDVALK.[L]			1.95153e-05	5.33751e-05	1.736	1	1	6	731341465	731341465 [537-566]			PREDICTED: phosphoglucomutase, cytoplasmic [Beta vulgaris subsp. vulgaris]	731341465	2	3409.75	30	507.9	196.3		106.5	146.3			31.2	11.8		1.08274e+07	8.50573e+06		2.34752e+06	1.23527e+06			803234	373716		2.20041e+07	8.50573e+06		4.61597e+06	6.33728e+06
FALSE		High	Unambiguous	LYIEQYENDSSKTGR	[R].LYIEQYENDSSKTGR.[D]			2.7352e-06	5.33751e-05	2.161	1	1	6	731341465	731341465 [537-551]			PREDICTED: phosphoglucomutase, cytoplasmic [Beta vulgaris subsp. vulgaris]	731341465	1	1802.86	15	270.3	165.6		134.2	61.5	47.1	67.4	105.1	96.2	52.5	2.74056e+06	3.41289e+06		1.40659e+06	247083	798264	586408	1.28702e+06	1.44464e+06	759541	5.56953e+06	3.41289e+06		2.7658e+06	1.2676e+06		969584
FALSE		High	Unambiguous	LYIEQYENDSSK	[R].LYIEQYENDSSK.[T]			1.80519e-05	5.33751e-05	1.753	1	1	16	731341465	731341465 [537-548]			PREDICTED: phosphoglucomutase, cytoplasmic [Beta vulgaris subsp. vulgaris]	731341465	0	1488.69	12	45.4	82.6	0.6	16.6	32.4	194.1	149.4	117.4	145.2	216.3	2.14029e+06	7.91345e+06	34160.4	807697	605110	1.53082e+07	6.03772e+06	6.68463e+06	10138230	1.45404e+07	4.34964e+06	7.91345e+06	55246.2	1.58819e+06	3.10437e+06		1.85936e+07
FALSE		High	Unambiguous	LYIQTMDPNDEDKFDFDPLDMTKTWPEDILPLQPVGR	[K].LYIQTMDPNDEDKFDFDPLDMTKTWPEDILPLQPVGR.[L]			2.09028e-05	5.33751e-05	1.721	1	1	6	731361773	731361773 [269-305]			PREDICTED: catalase [Beta vulgaris subsp. vulgaris]	731361773	2	4393.1	37	132.2	209.6		91	64.9	11.2	165.6	118.5	165.7	41.2	2973823	9.58198e+06		2.11528e+06	578184	419751	3.19441e+06	3.22104e+06	5.52321e+06	1.32293e+06	6.04359e+06	9.58198e+06		4.15931e+06	2.96624e+06		509837
FALSE		High	Unambiguous	LYMEARPMEEGLAEAIDEGR	[R].LYMEARPMEEGLAEAIDEGR.[I]	2xOxidation [M3; M8]	2xOxidation [M3; M8]	5.46011e-06	5.33751e-05	2.012	1	2	7	731362937	731362937 [587-606]			PREDICTED: elongation factor 2 [Beta vulgaris subsp. vulgaris]	731362937; 733214592	0	2312.05	20	38.1				224.6	49.1			194.6	493.6	216229				504837	466323			1.6364e+06	3.99573e+06	439435				2.58995e+06		566403
FALSE		High	Unambiguous	IYDRIPLTYTEGQADNPTDSEQEFTLNFTYTK	[R].IYDRIPLTYTEGQADNPTDSEQEFTLNFTYTK.[T]			3.67472e-07	5.33751e-05	2.593	1	1	1	731377457	731377457 [312-343]			PREDICTED: uncharacterized protein LOC104884875 [Beta vulgaris subsp. vulgaris]	731377457	1	3770.77	32	418.9	216.3		133.5		55.3	18.2	79.7	41.7	36.4	3.51479e+06	3689338		1.15768e+06		776004	130757	808333	518304	435711	7.14297e+06	3689338		2.27637e+06			942547
FALSE		High	Unambiguous	LYDNTAMENLLK	[K].LYDNTAMENLLK.[S]			2.86327e-05	5.33751e-05	1.652	1	2	19	731358147	731358147 [235-246]			PREDICTED: aminoacylase-1 isoform X1 [Beta vulgaris subsp. vulgaris]	731358149; 731358147	0	1424.71	12	163.1	175.5	76.9	86.3	118.8	95.2	74.1	69.1	58	83	8739294	1.91049e+07	5.17702e+06	4.78018e+06	2.52154e+06	8.5373e+06	3.40661e+06	4.47052e+06	4.60239e+06	6.34385e+06	1.77605e+07	1.91049e+07	8.37259e+06	9.39935e+06	1.29362e+07		1.03695e+07
FALSE		High	Unambiguous	LWIGSVMMPSVWVYNLH	[K].LWIGSVMMPSVWVYNLH.[-]			3.4165e-05	5.33751e-05	1.613	1	1	1	731324467	731324467 [361-377]			PREDICTED: protein STRICTOSIDINE SYNTHASE-LIKE 10 [Beta vulgaris subsp. vulgaris]	731324467	0	2032.02	17								370	630									571394	1.19334e+06
FALSE		High	Unambiguous	IWHHTFYNELR	[K].IWHHTFYNELR.[V]			1.92488e-05	5.33751e-05	1.739	5	6	279	731311844; 731311848; 731348994; 731380435; 731343368	731311844 [87-97]; 731311848 [87-97]; 731348994 [87-97]; 731380435 [86-96]; 731343368 [87-97]			PREDICTED: actin-7 [Beta vulgaris subsp. vulgaris] PREDICTED: actin-7 [Beta vulgaris subsp. vulgaris] PREDICTED: actin-66 [Beta vulgaris subsp. vulgaris] PREDICTED: actin-85C, partial [Beta vulgaris subsp. vulgaris] PREDICTED: actin-11 [Beta vulgaris subsp. vulgaris]	731311844; 731311848; 731348994; 731380435; 731343368; 731315233	0	1515.75	11	17.6	24	58	30.7	19.9	323.2	177.9	75.6	113.2	160.1	1.84153e+07	5.12716e+07	7.64405e+07	3.33096e+07	8.25759e+06	5.67243e+08	1.60016e+08	9.57838e+07	1.75883e+08	2.39508e+08	3.74248e+07	5.12716e+07	1.23624e+08	6.54973e+07	4.23637e+07		6.88982e+08
FALSE		High	Unambiguous	IWGTSPDSIDAAEDR	[R].IWGTSPDSIDAAEDR.[K]			3.61361e-06	5.33751e-05	2.101	1	1	7	731361443	731361443 [760-774]			PREDICTED: carbamoyl-phosphate synthase large chain, chloroplastic [Beta vulgaris subsp. vulgaris]	731361443	0	1632.75	15	64.1	113.9	160.1	66.2	78.4	27.7	70	150.3	62.4	206.9	656957	2.37282e+06	2.06137e+06	701427	318086	474156	614794	1.86114e+06	947615	3.02484e+06	1.33511e+06	2.37282e+06	3.33378e+06	1.37923e+06	1.63186e+06		575918
FALSE		High	Unambiguous	IWGEQGQAALEK	[R].IWGEQGQAALEK.[A]			6.79766e-05	5.33751e-05	1.458	1	1	3	731351819	731351819 [14-25]			PREDICTED: NEDD8-activating enzyme E1 regulatory subunit AXR1 [Beta vulgaris subsp. vulgaris]	731351819	0	1329.68	12	197.8	227.8	0.8	1.5	16.8	170.7	165.1	64.3	129.5	25.7	1.95028e+06	4.56437e+06	9391.19	15287.3	65728.8	2.81721e+06	1.39661e+06	765731	1.89251e+06	361228	3.96349e+06	4.56437e+06	15188	30059.6	337206		3.42183e+06
FALSE		High	Unambiguous	LWGENFFDPATKKWTTK	[R].LWGENFFDPATKKWTTK.[N]			1.00115e-05	5.33751e-05	1.881	1	2	19	731362937	731362937 [244-260]			PREDICTED: elongation factor 2 [Beta vulgaris subsp. vulgaris]	731362937; 733214592	2	2069.05	17	380.1	89	39	53.9	87.5	47.6	65.6	55.9	93.3	88	3.09228e+07	1.47104e+07	3.98727e+06	4.53126e+06	2.81881e+06	6.48105e+06	4.57512e+06	5.49812e+06	1.1248e+07	1.02118e+07	6.28432e+07	1.47104e+07	6.44845e+06	8.90989e+06	1.44612e+07		7.87199e+06
FALSE		High	Unambiguous	LWGENFFDPATKK	[R].LWGENFFDPATKK.[W]			1.65636e-06	5.33751e-05	2.269	1	2	155	731362937	731362937 [244-256]			PREDICTED: elongation factor 2 [Beta vulgaris subsp. vulgaris]	731362937; 733214592	1	1552.78	13	61	101	51.8	105.1	121.2	226.5	91.3	58	79.7	104.4	7.63417e+07	2.57142e+08	8.15861e+07	1.36035e+08	6.01222e+07	4.74561e+08	9.8036e+07	8.77886e+07	1.47847e+08	1.86469e+08	1.55146e+08	2.57142e+08	1.31946e+08	2.67488e+08	3.08443e+08		5.76409e+08
FALSE		High	Unambiguous	LWGENFFDPATK	[R].LWGENFFDPATK.[K]			5.2858e-06	5.33751e-05	2.019	1	2	61	731362937	731362937 [244-255]			PREDICTED: elongation factor 2 [Beta vulgaris subsp. vulgaris]	731362937; 733214592	0	1424.68	12	61.1	113.2	65.5	56.9	96.7	141.2	141.8	105.8	90.3	127.4	20521035	7.72274e+07	2.76134e+07	1.97525e+07	1.28504e+07	7.92691e+07	4.08142e+07	4.28922e+07	4.4901e+07	6.10057e+07	4.17041e+07	7.72274e+07	4.4658e+07	3.88397e+07	6.59262e+07		9.62815e+07
FALSE		High	Unambiguous	IWFYGDDDPNERLR	[R].IWFYGDDDPNERLR.[L]			6.34071e-05	5.33751e-05	1.474	1	2	10	731358965	731358965 [319-332]			PREDICTED: presequence protease 2, chloroplastic/mitochondrial isoform X1 [Beta vulgaris subsp. vulgaris]	731358965; 731358967	1	1795.84	14	151.4	159.8	67.9	61.6	102.8	212.7	72.9	56.7	31.6	82.7	2.27415e+06	4.87651e+06	1.28137e+06	956808	611475	5.34461e+06	939215	1.02904e+06	702528	1.77197e+06	4.62167e+06	4.87651e+06	2.07231e+06	1.88139e+06	3.13703e+06		6.49165e+06
FALSE		High	Unambiguous	IWIKPWLNFR	[K].IWIKPWLNFR.[K]			9.95961e-05	5.33751e-05	1.368	1	1	77	731326400	731326400 [78-87]			PREDICTED: cysteine proteinase inhibitor A [Beta vulgaris subsp. vulgaris]	731326400	0	1372.79	10		57.3	96	89.9	22.3	87.2	90	349.1	103.2	105		2.17029e+07	2.24871e+07	1.73228e+07	1.64503e+06	2.71879e+07	1.43796e+07	7.85822e+07	2.84903e+07	2.79097e+07		2.17029e+07	3.63674e+07	3.40621e+07	8.43944e+06		3.30228e+07
FALSE		High	Unambiguous	LWFDPTTDFHTYSILWNPQR	[R].LWFDPTTDFHTYSILWNPQR.[I]			2.87852e-06	5.33751e-05	2.15	1	1	13	731319555	731319555 [132-151]			PREDICTED: probable xyloglucan endotransglucosylase/hydrolase protein 23 [Beta vulgaris subsp. vulgaris]	731319555	0	2537.22	20	176.9	141	170	105.2	55.3	43.2	87.4	98.5	108.9	13.5	7.15313e+06	1.15887e+07	8.63562e+06	4.39658e+06	886447	2.92335e+06	3.03124e+06	4.81217e+06	6.52673e+06	778376	1.4537e+07	1.15887e+07	1.3966e+07	8.64506e+06	4.54771e+06		3.55074e+06
FALSE		High	Unambiguous	LWFDPTNEYHTYSIVWNPR	[R].LWFDPTNEYHTYSIVWNPR.[L]			5.58811e-06	5.33751e-05	2.007	1	1	2	731340991	731340991 [146-164]			PREDICTED: xyloglucan endotransglucosylase/hydrolase 2 [Beta vulgaris subsp. vulgaris]	731340991	0	2438.16	19				16.9	11.2			634	311.6	26.2				88713.5	22576.4			3.88281e+06	2.34047e+06	189692				174439	115823
FALSE		High	Unambiguous	IWEDVPHIEGAIIVNIGDMTER	[R].IWEDVPHIEGAIIVNIGDMTER.[W]			1.19861e-05	5.33751e-05	1.842	1	1	1	731332215	731332215 [220-241]			PREDICTED: 2-oxoglutarate-Fe(II) type oxidoreductase [Beta vulgaris subsp. vulgaris]	731332215	0	2507.26	22	571.4			125.5	132.9		170.2				1.56737e+06			355902	144356		400263				3.18531e+06			699817	740583
FALSE		High	Unambiguous	LWDLAAGTTAR	[R].LWDLAAGTTAR.[R]			3.37052e-05	5.33751e-05	1.616	1	1	49	731334235	731334235 [89-99]			PREDICTED: guanine nucleotide-binding protein subunit beta-like protein [Beta vulgaris subsp. vulgaris]	731334235	0	1174.62	11	28	97.3	225	80.8	84.1	109.3	99.1	79.9	97	99.6	9.78409e+06	6.91209e+07	9.87886e+07	2.91685e+07	1.16358e+07	63887389	2.96994e+07	3.37417e+07	5.02049e+07	4.96393e+07	1.98838e+07	6.91209e+07	1.59767e+08	5.73544e+07	5.96946e+07		7.75987e+07
FALSE		High	Unambiguous	IWDHAAGSIVVTEAGGIVTDAAGNPLDFSK	[K].IWDHAAGSIVVTEAGGIVTDAAGNPLDFSK.[G]			1.18756e-07	5.33751e-05	2.836	1	1	7	731338238	731338238 [316-345]			PREDICTED: SAL1 phosphatase-like [Beta vulgaris subsp. vulgaris]	731338238	0	3011.51	30		206.2		168.9	27.3	69.6	117.8	216.8	107	86.5		7387894		3.07724e+06	190508	2.05255e+06	1.78053e+06	4.61647e+06	2.7957e+06	2.17474e+06		7387894		6.05083e+06	977356		2.49306e+06
FALSE		High	Unambiguous	IWCFGPETTGPNMVVDMCK	[K].IWCFGPETTGPNMVVDMCK.[G]	2xCarbamidomethyl [C3; C18]	2xCarbamidomethyl [C3; C18]	1.41434e-06	5.33751e-05	2.303	1	2	46	731362937	731362937 [634-652]			PREDICTED: elongation factor 2 [Beta vulgaris subsp. vulgaris]	731362937; 733214592	0	2241.98	19	1.6	229.8	22.2	146.1	93.8	63.6	93.4	166.1	123.9	59.7	160849	4.76076e+07	2.8435e+06	1.53959e+07	3.78669e+06	1.08426e+07	8.16291e+06	2.0461e+07	1.87143e+07	8.68533e+06	326887	4.76076e+07	4.59868e+06	3.02731e+07	1.94267e+07		1.31695e+07
FALSE		High	Unambiguous	LWASSDEEGWLLPSDAESWR	[K].LWASSDEEGWLLPSDAESWR.[C]			1.89034e-07	5.33751e-05	2.736	1	1	9	731330420	731330420 [448-467]			PREDICTED: enhancer of mRNA-decapping protein 4 [Beta vulgaris subsp. vulgaris]	731330420	0	2334.07	20		168.4	29.5	144.7	76.9	296.1	85.2	64.6	74.6	59.9		4.7943e+06	519463	2.09467e+06	426503	6939544	1.02332e+06	1.09343e+06	1547165	1.19761e+06		4.7943e+06	840107	4.11878e+06	2.18807e+06		8.42888e+06
FALSE		High	Unambiguous	LVYSSVAGAFTGLLLFR	[R].LVYSSVAGAFTGLLLFR.[S]			1.80081e-06	5.33751e-05	2.251	1	1	5	731311009	731311009 [25-41]			PREDICTED: MICOS complex subunit Mic10 [Beta vulgaris subsp. vulgaris]	731311009	0	1814.02	17				58.4		12.5	44	572.8	247.2	65.1				194305		67448.7	121295	2.22646e+06	1.17855e+06	298705				382065			81924.3
FALSE		High	Unambiguous	IVYIKPSGTTLSFNELVSLWEKK	[K].IVYIKPSGTTLSFNELVSLWEKK.[I]			2.18811e-05	5.33751e-05	1.711	1	1	10	731358632	731358632 [239-261]			PREDICTED: isoflavone reductase-like protein [Beta vulgaris subsp. vulgaris]	731358632	1	2652.46	23	275.2	62.3	7	83.8	23.1	82	45.6	84.1	235.1	101.9	5.14965e+06	2.36797e+06	164959	1.62063e+06	170898	2.56793e+06	732574	1.90226e+06	6.51844e+06	2.71907e+06	1.04654e+07	2.36797e+06	266781	3.18667e+06	876753		3.11905e+06
FALSE		High	Unambiguous	LWFDPTSDFHTYSILWNPQR	[R].LWFDPTSDFHTYSILWNPQR.[I]			1.63174e-05	5.33751e-05	1.775	1	1	19	731312849	731312849 [133-152]			PREDICTED: probable xyloglucan endotransglucosylase/hydrolase protein 23 [Beta vulgaris subsp. vulgaris]	731312849	0	2523.21	20	71	149.4	104	136.4	61.2	95.3	72.3	121.6	152.2	36.7	4.98048e+06	2.13177e+07	9.17118e+06	9.89414e+06	1.70128e+06	1.11864e+07	4.34892e+06	1.0314e+07	1.58248e+07	3.67762e+06	1.01216e+07	2.13177e+07	1.48322e+07	1.9455e+07	8.72804e+06		1.35871e+07
FALSE		High	Unambiguous	LYDPGYLNTAPVR	[K].LYDPGYLNTAPVR.[S]			9.51542e-06	5.33751e-05	1.892	1	1	23	731356945	731356945 [103-115]			PREDICTED: citrate synthase, glyoxysomal [Beta vulgaris subsp. vulgaris]	731356945	0	1478.76	13	99.7	75.6	61.7	59.1	107	79.2	140.5	141.5	96.2	139.5	4.62394e+06	7.11861e+06	3.59362e+06	2.83407e+06	1.96529e+06	6.14646e+06	5.58623e+06	7.92226e+06	6.60744e+06	9.22294e+06	9.39705e+06	7.11861e+06	5.81181e+06	5.57267e+06	1.00825e+07		7.46559e+06
FALSE		High	Unambiguous	LWNTLGECKYTIQDSDGHTDWVSCVR	[K].LWNTLGECKYTIQDSDGHTDWVSCVR.[F]	2xCarbamidomethyl [C8; C24]	2xCarbamidomethyl [C8; C24]	1.8524e-09	5.33751e-05	3.731	1	1	15	731334235	731334235 [131-156]			PREDICTED: guanine nucleotide-binding protein subunit beta-like protein [Beta vulgaris subsp. vulgaris]	731334235	1	3140.42	26	8.7	191.9		166.8	243.2	185.7	23	101.4	55.2	23.9	482535	2.16164e+07		9.55667e+06	5.33865e+06	1.72239e+07	1.09379e+06	6.7912e+06	4.53542e+06	1.89237e+06	980639	2.16164e+07		1.87914e+07	2.73887e+07		2.09204e+07
FALSE		High	Unambiguous	LWQLLADNIQDQGSDPLEALGWKK	[K].LWQLLADNIQDQGSDPLEALGWKK.[T]			6.45223e-05	5.33751e-05	1.47	1	2	2	731335919	731335919 [129-152]			PREDICTED: uncharacterized protein LOC104894450 isoform X1 [Beta vulgaris subsp. vulgaris]	1108927105; 731335919	1	2738.41	24	207.8	364.1		214.1						214	583045	2.07614e+06		620904						856334	1.1849e+06	2.07614e+06		1.22089e+06
FALSE		High	Unambiguous	LYDLLLQNVADLSDLVTSGR	[R].LYDLLLQNVADLSDLVTSGR.[D]			2.75881e-08	5.33751e-05	3.15	1	1	12	1108955564	1108955564 [391-410]			PREDICTED: signal recognition particle subunit SRP68 [Beta vulgaris subsp. vulgaris]	1108955564	0	2205.18	20	29.5	158.4	165.7	18.7	197.5	128.8	113.4	36.9	80.2	70.9	1.06156e+06	1.15933e+07	7.50037e+06	695094	2.81804e+06	7.76023e+06	3.5012e+06	1.60443e+06	4.28024e+06	3.64166e+06	2.15737e+06	1.15933e+07	1.213e+07	1.36677e+06	1.44573e+07		9.4257e+06
FALSE		High	Unambiguous	IYDFLWIAEDGMK	[R].IYDFLWIAEDGMK.[M]			2.85029e-05	5.33751e-05	1.653	1	1	7	731333051	731333051 [394-406]			PREDICTED: cycloartenol synthase 2 [Beta vulgaris subsp. vulgaris]	731333051	0	1600.77	13	21.1	60.2	217.7	170	34.7	21.8	173.9	98.3	149	53.4	215204	1.24839e+06	2.79077e+06	1792376	140313	371715	1.52164e+06	1.21159e+06	2.25309e+06	776733	437351	1.24839e+06	4.5134e+06	3.52438e+06	719845		451492
FALSE		High	Unambiguous	LYDEWVIPLTK	[R].LYDEWVIPLTK.[V]			6.8866e-05	5.33751e-05	1.455	1	1	11	1108880601	1108880601 [233-243]			PREDICTED: chorismate mutase 2 [Beta vulgaris subsp. vulgaris]	1108880601	0	1376.75	11	105	140.4		72.8	162.7	55.2	129.2	135.1	95	104.6	1.95718e+06	5.3202e+06		1.40237e+06	1.20134e+06	1.72163e+06	2.06558e+06	3.04253e+06	2.6236e+06	2.77989e+06	3.97751e+06	5.3202e+06		2.75751e+06	6.16317e+06		2.09111e+06
FALSE		High	Unambiguous	LYDAFTPYVSKNPR	[K].LYDAFTPYVSKNPR.[Q]			7.06767e-05	5.33751e-05	1.449	1	1	4	731347987	731347987 [465-478]			PREDICTED: berberine bridge enzyme-like 4 [Beta vulgaris subsp. vulgaris]	731347987	1	1670.85	14	77.7	1.5	136.1	174.6	318.8		80.5	31.9	61.7	117.3	911527	34711.9	2.00563e+06	2.11593e+06	1.48067e+06		809124	451186	1.07103e+06	1.96262e+06	1.85246e+06	34711.9	3.24362e+06	4.16059e+06	7.59624e+06
FALSE		High	Unambiguous	IYASLWNADDWATQGGLVK	[RK].IYASLWNADDWATQGGLVK.[T]			1.61833e-06	5.33751e-05	2.274	2	3	15	731325110; 731325106	731325110 [197-215]; 731325106 [196-214]			PREDICTED: xyloglucan endotransglucosylase/hydrolase protein 24 [Beta vulgaris subsp. vulgaris] PREDICTED: xyloglucan endotransglucosylase/hydrolase protein 24-like [Beta vulgaris subsp. vulgaris]	731325110; 731325108; 731325106	0	2108.04	19		171.4	79.6	75.6	83.9	127.8	61.5	198.7	107.8	93.6		1.33533e+07	3.83272e+06	2.99508e+06	1.27451e+06	8.19349e+06	2.02231e+06	9.20288e+06	6.12465e+06	5.11737e+06		1.33533e+07	6.1985e+06	5.88927e+06	6.53858e+06		9.95195e+06
FALSE		High	Unambiguous	LYASIDIEGAR	[K].LYASIDIEGAR.[V]			4.80375e-05	5.33751e-05	1.537	1	1	6	731353298	731353298 [47-57]			PREDICTED: phospholipase D alpha 1 [Beta vulgaris subsp. vulgaris]	731353298	0	1207.63	11	108	196	286.3	24.5		27.1	38.2	198	13.2	108.7	1.50269e+06	5.54195e+06	5.00513e+06	352216		630422	456174	3.32851e+06	272710	2.15791e+06	3.05386e+06	5.54195e+06	8.0946e+06	692569			765721
FALSE		High	Unambiguous	LYALDDEVHLGK	[R].LYALDDEVHLGK.[T]			1.50214e-05	5.33751e-05	1.793	1	1	16	731331688	731331688 [136-147]			PREDICTED: uncharacterized protein LOC104892530 [Beta vulgaris subsp. vulgaris]	731331688	0	1372.71	12	196.8	94.8	209.7	128.2	24.6	51.7	44	111	68.6	70.6	9.5399e+06	9.34143e+06	1.27728e+07	6.42602e+06	472925	4.19089e+06	1.82846e+06	6.50002e+06	4.93028e+06	4.88211e+06	1.93876e+07	9.34143e+06	2.06569e+07	1.26356e+07	2.42623e+06		5.09033e+06
FALSE		High	Unambiguous	LYAFGGEFTPR	[K].LYAFGGEFTPR.[V]			1.73215e-05	5.33751e-05	1.762	1	1	3	731355711	731355711 [33-43]			PREDICTED: nitrile-specifier protein 5 [Beta vulgaris subsp. vulgaris]	731355711	0	1257.63	11	131.8	9.8	232.8	9.2	165.5	38	42	86	115.7	169.2	904925	137069	2.0091e+06	64953.5	450189	436352	247216	713494	1.1771e+06	1.65703e+06	1.83905e+06	137069	3.24924e+06	127719	2.30959e+06		530000
FALSE		High	Unambiguous	IWQGSEDGNYDCR	[R].IWQGSEDGNYDCR.[H]	1xCarbamidomethyl [C12]	1xCarbamidomethyl [C12]	8.17672e-05	5.33751e-05	1.415	1	1	2	731320676	731320676 [293-305]			PREDICTED: pre-mRNA-processing factor 19 [Beta vulgaris subsp. vulgaris]	731320676	0	1599.65	13	36.3	319			14.3	198.8	163.1	25.7	78.8	163.9	181133	3.23125e+06			28301.4	1.65735e+06	696963	154982	582111	1.16507e+06	368109	3.23125e+06			145194		2.01305e+06
FALSE		High	Unambiguous	IWYQAEEVFPIDGTPEQR	[R].IWYQAEEVFPIDGTPEQR.[Q]			5.95885e-07	5.33751e-05	2.489	1	1	65	731317224	731317224 [193-210]			PREDICTED: bark storage protein B [Beta vulgaris subsp. vulgaris]	731317224	0	2178.05	18	89.6	106.8	40.4	159.4	165.9	53.8	64.7	127.8	102.4	89.2	1.12867e+07	2.73351e+07	6.38533e+06	2.07386e+07	8.27317e+06	1.13313e+07	6.99122e+06	1.94418e+07	1.90977e+07	1.6024e+07	2.29376e+07	2.73351e+07	1.03267e+07	4.07786e+07	4.24436e+07		1.37632e+07
FALSE		High	Unambiguous	IWSVAMEEFMGK	[R].IWSVAMEEFMGK.[G]			7.97044e-05	5.33751e-05	1.421	1	1	9	731327310	731327310 [122-133]			PREDICTED: pectin acetylesterase 6 [Beta vulgaris subsp. vulgaris]	731327310	0	1427.67	12		192.6	6.2	72.3	68.9	232.9	100.3	114.4	137.4	75		5.08742e+06	101995	970937	355035	5.06581e+06	1.11815e+06	1.7968e+06	2645349	1390022		5.08742e+06	164952	1.90917e+06	1.82143e+06		6.15301e+06
FALSE		High	Unambiguous	LWSTTVPSEEFDLSAFNAGEHSK	[R].LWSTTVPSEEFDLSAFNAGEHSK.[A]			0.000102516	5.33751e-05	1.361	1	1	1	731362980	731362980 [307-329]			PREDICTED: alpha-1,4 glucan phosphorylase L isozyme, chloroplastic/amyloplastic [Beta vulgaris subsp. vulgaris]	731362980	0	2552.19	23
FALSE		High	Unambiguous	LWSTINEPFVFGSFGYK	[K].LWSTINEPFVFGSFGYK.[M]			8.53716e-08	5.33751e-05	2.907	1	1	61	1108945887	1108945887 [248-264]			PREDICTED: beta-glucosidase 13 [Beta vulgaris subsp. vulgaris]	1108945887	0	1991.99	17	3.8	68.9	122.8	80.1	43.9	149.5	167.8	138.8	125.2	99.3	1.2202e+06	4.48213e+07	4.94092e+07	2.65145e+07	5.57595e+06	8.01205e+07	4.60995e+07	5.36883e+07	5.93904e+07	4.53437e+07	2.47978e+06	4.48213e+07	7.99074e+07	5.21359e+07	2.86061e+07		9.73157e+07
FALSE		High	Unambiguous	IWSGNFATKYPDVLSDK	[K].IWSGNFATKYPDVLSDK.[A]			6.36216e-06	5.33751e-05	1.979	1	1	1	731316634	731316634 [54-70]			PREDICTED: uncharacterized protein LOC104908856 [Beta vulgaris subsp. vulgaris]	731316634	1	1940.98	17	166.8	283.9		75.6			47.2	177.2	118.4	131	694953	2.40387e+06		325426			168843	891991	730896	778374	1.41233e+06	2.40387e+06		639890
FALSE		High	Unambiguous	LWSDIYTITYQR	[R].LWSDIYTITYQR.[A]			2.4752e-05	5.33751e-05	1.684	1	1	9	731357748	731357748 [1251-1262]			PREDICTED: E3 ubiquitin-protein ligase UPL3 [Beta vulgaris subsp. vulgaris]	731357748	0	1558.79	12	0.7	86.4	19	89.8	38.3	134.4	44.9	287.2	188.2	110.9	10404	2.44924e+06	333340	1.2941e+06	211716	3.13515e+06	537080	4.837e+06	3.8876e+06	2.20529e+06	21143.6	2.44924e+06	539097	2.54462e+06	1.08616e+06		3.808e+06
FALSE		High	Unambiguous	LWQVPETLTDEVLGK	[K].LWQVPETLTDEVLGK.[M]			1.64104e-06	5.33751e-05	2.271	1	1	118	731365038	731365038 [37-51]			PREDICTED: NAD(P)H dehydrogenase (quinone) FQR1 isoform X1 [Beta vulgaris subsp. vulgaris]	731365038	0	1727.92	15	158.5	187.9	86.6	132.8	61.9	82.7	64.4	79	92.5	53.6	1.4603e+08	3.51681e+08	1.00218e+08	1.26447e+08	2.25887e+07	1.27447e+08	5.08594e+07	8.79396e+07	1.26213e+08	7.04635e+07	2.96772e+08	3.51681e+08	1.62079e+08	2.48635e+08	1.15886e+08		1.54799e+08
FALSE		High	Unambiguous	LWQVPETLHDDVLAK	[K].LWQVPETLHDDVLAK.[M]			2.57499e-06	5.33751e-05	2.174	1	1	56	731370577	731370577 [37-51]			PREDICTED: probable NAD(P)H dehydrogenase (quinone) FQR1-like 1 [Beta vulgaris subsp. vulgaris]	731370577	0	1763.93	15	104.8	81.4	116.8	50.8	282	86.1	51.1	80.2	91.7	55.2	1.84503e+07	2.91239e+07	2.58332e+07	9.23684e+06	1.9671e+07	2.53753e+07	7.70841e+06	1.70575e+07	2.39186e+07	1.38525e+07	3.74959e+07	2.91239e+07	4.1779e+07	1.81626e+07	1.00917e+08		3.08213e+07
FALSE		High	Unambiguous	IWQTGPLTPEENETANTTGASTGK	[R].IWQTGPLTPEENETANTTGASTGK.[V]			4.39404e-05	5.33751e-05	1.557	1	1	1	731353496	731353496 [296-319]			PREDICTED: serine-threonine kinase receptor-associated protein [Beta vulgaris subsp. vulgaris]	731353496	0	2503.19	24		974	26									822003	13565.8									822003	21939.4
FALSE		High	Unambiguous	IWSYNDVYTDGRPTQGGFATNMVVDQK	[K].IWSYNDVYTDGRPTQGGFATNMVVDQK.[F]			2.1583e-05	5.33751e-05	1.714	1	1	11	731360180	731360180 [118-144]			PREDICTED: probable cinnamyl alcohol dehydrogenase 1 [Beta vulgaris subsp. vulgaris]	731360180	0	3062.43	27	172.6	183.4		171.4	101.1	83.4	96	32.9	94.2	64.9	5319963	1.14879e+07		5.45902e+06	1.23433e+06	4.30049e+06	2.53615e+06	1.22574e+06	4.30073e+06	2.85426e+06	1.08116e+07	1.14879e+07		1.07342e+07	6.33242e+06		5.22345e+06
FALSE		High	Unambiguous	MAATETKPATEEAK	[-].MAATETKPATEEAK.[M]	1xMet-loss+Acetyl [N-Term]	1xMet-loss+Acetyl [N-Term]	8.76378e-07	5.33751e-05	2.406	1	1	9	731335470	731335470 [1-14]	731335470 1xMet-loss+Acetyl [N-Term]	731335470 1xMet-loss+Acetyl [N-Term]	PREDICTED: protein DSS1 HOMOLOG ON CHROMOSOME V [Beta vulgaris subsp. vulgaris]	731335470	0	1388.69	14	39.7	24.8	1.8			426	214.8	72.9	220		310986	394516	18047.7			5.58007e+06	1.44186e+06	689073	2.55223e+06		632004	394516	29187.8				6.77765e+06
FALSE		High	Unambiguous	LYMEARPMEEGLAEAIDEGRIGPR	[R].LYMEARPMEEGLAEAIDEGRIGPR.[D]			5.96841e-08	5.33751e-05	2.984	1	2	30	731362937	731362937 [587-610]			PREDICTED: elongation factor 2 [Beta vulgaris subsp. vulgaris]	731362937; 733214592	1	2703.32	24	241	137.4	19.3	217.9	74.9	20	109.6	49.5	86.6	43.8	3.79253e+07	4.39376e+07	3.80717e+06	3.5444e+07	4.67091e+06	5.27773e+06	1.4797e+07	9.41578e+06	2.01828e+07	9.84032e+06	7.70742e+07	4.39376e+07	6.15718e+06	6.96942e+07	2.3963e+07		6.41042e+06
FALSE		High	Unambiguous	IYNAISDGTVNLVDKFFEMQR	[K].IYNAISDGTVNLVDKFFEMQR.[S]			1.59468e-05	5.33751e-05	1.78	1	1	1	731353154	731353154 [223-243]			PREDICTED: putative clathrin assembly protein At5g35200 [Beta vulgaris subsp. vulgaris]	731353154	1	2460.22	21									1000										1.01303e+06
FALSE		High	Unambiguous	MAAMIDQLQIR	[K].MAAMIDQLQIR.[D]			1.86409e-05	5.33751e-05	1.746	1	1	29	731334059	731334059 [20-30]			PREDICTED: mitochondrial import inner membrane translocase subunit Tim9 [Beta vulgaris subsp. vulgaris]	731334059	0	1289.67	11	1.2	203.8	4.7	254.4	43	99.6	138.6	66	109.3	79.4	64780.8	2.29983e+07	326187	1.46047e+07	947105	9.25495e+06	6.60038e+06	4.42959e+06	8.99734e+06	6.29184e+06	131652	2.29983e+07	527528	2.87174e+07	4.8589e+06		1.12412e+07
FALSE		High	Unambiguous	MAAIYNFYIINKSGGLIYYKDYGSAGR	[-].MAAIYNFYIINKSGGLIYYKDYGSAGR.[M]	1xMet-loss+Acetyl [N-Term]	1xMet-loss+Acetyl [N-Term]	1.44087e-06	5.33751e-05	2.299	1	2	4	731327498	731327498 [1-27]	731327498 1xMet-loss+Acetyl [N-Term]	731327498 1xMet-loss+Acetyl [N-Term]	PREDICTED: trafficking protein particle complex subunit 4 [Beta vulgaris subsp. vulgaris]	731327498; 731361555	2	2959.5	27				211.5	10.6			435.4	223.5	119				1.81813e+06	34987.7			4.37501e+06	2.75367e+06	1.41198e+06				3.57502e+06	179496
FALSE		High	Unambiguous	MAALSQAGVIFVMTHDSIGLGEDGPTHQPIEHLASFR	[R].MAALSQAGVIFVMTHDSIGLGEDGPTHQPIEHLASFR.[A]			3.83672e-11	5.33751e-05	4.565	1	1	31	731362582	731362582 [524-560]			PREDICTED: transketolase, chloroplastic [Beta vulgaris subsp. vulgaris]	731362582	0	3932.94	37	107.7	120	106.7	139.2	9.1	46.3	44.4	232.5	151.3	42.8	2.11142e+07	4.78182e+07	26283374	2.82043e+07	703846	1.51859e+07	7.45816e+06	5.50617e+07	4.39424e+07	1.19673e+07	4.29097e+07	4.78182e+07	4.2507e+07	5.54585e+07	3.61092e+06		1.8445e+07
FALSE		High	Unambiguous	MAALQYLETQR	[-].MAALQYLETQR.[N]	1xMet-loss+Acetyl [N-Term]	1xMet-loss+Acetyl [N-Term]	1.6094e-05	5.33751e-05	1.778	1	1	26	731332947	731332947 [1-11]	731332947 1xMet-loss+Acetyl [N-Term]	731332947 1xMet-loss+Acetyl [N-Term]	PREDICTED: 26S proteasome non-ATPase regulatory subunit 13 homolog B [Beta vulgaris subsp. vulgaris]	731332947	0	1234.64	11	155.3	153.7	6.6	64.3	63.9	115.6	83.7	123.1	141.8	92.1	1.55171e+07	3.12101e+07	822511	6.64114e+06	2.52787e+06	1.93175e+07	7.17103e+06	1.48519e+07	2.09889e+07	1.31275e+07	3.15348e+07	3.12101e+07	1.33021e+06	1.30586e+07	1.29687e+07		2.34633e+07
FALSE		High	Unambiguous	MAAIGTPSNDAADLLQK	[-].MAAIGTPSNDAADLLQK.[L]	1xMet-loss+Acetyl [N-Term]	1xMet-loss+Acetyl [N-Term]	1.34387e-06	5.33751e-05	2.314	1	1	5	731322733	731322733 [1-17]	731322733 1xMet-loss+Acetyl [N-Term]	731322733 1xMet-loss+Acetyl [N-Term]	PREDICTED: uncharacterized protein LOC104888716 [Beta vulgaris subsp. vulgaris]	731322733	0	1626.83	17	53.1	368.4		26.6	39	109.7	99.1	46.6	104.1	153.4	741157	10441160		383620	215327	2.56052e+06	1.1858e+06	785177	2.15049e+06	3.05091e+06	1.50623e+06	10441160		754318	1.10468e+06		3.11004e+06
FALSE		High	Unambiguous	MAALECSEEVDPIAK	[K].MAALECSEEVDPIAK.[A]	1xCarbamidomethyl [C6]	1xCarbamidomethyl [C6]	6.45118e-06	5.33751e-05	1.976	1	1	20	731328292	731328292 [302-316]			PREDICTED: bifunctional 3-dehydroquinate dehydratase/shikimate dehydrogenase, chloroplastic [Beta vulgaris subsp. vulgaris]	731328292	0	1662.77	15		168.4	12.9	66	37	146.1	142.8	103	163.8	160.1		7.84182e+06	370201	1.56214e+06	335519	5.60353e+06	2.80734e+06	2.85128e+06	5.55993e+06	5.23407e+06		7.84182e+06	598712	3.07166e+06	1.7213e+06		6.80614e+06
FALSE		High	Unambiguous	MAAFYAGFPEIVPVR	[R].MAAFYAGFPEIVPVR.[T]			1.16359e-06	5.33751e-05	2.345	1	1	58	731368458	731368458 [118-132]			PREDICTED: 3-ketoacyl-CoA thiolase 2, peroxisomal [Beta vulgaris subsp. vulgaris]	731368458	0	1667.86	15	162.2	124.9	30.2	157.9	46.8	76.2	70.6	172.6	97.4	61.1	3.29162e+07	5.14994e+07	7.70745e+06	3.31062e+07	3.76007e+06	2.58787e+07	1.22799e+07	4.23125e+07	2.92663e+07	1.7678e+07	6.68944e+07	5.14994e+07	1.24649e+07	6.50973e+07	1.92902e+07		3.14327e+07
FALSE		High	Unambiguous	MAAFFPDCSDYHLSPEEKAEEVANFK	[-].MAAFFPDCSDYHLSPEEKAEEVANFK.[L]	1xCarbamidomethyl [C8]; 1xMet-loss+Acetyl [N-Term]	1xCarbamidomethyl [C8]; 1xMet-loss+Acetyl [N-Term]	7.60419e-05	5.33751e-05	1.432	1	1	4	731372366	731372366 [1-26]	731372366 1xMet-loss+Acetyl [N-Term]	731372366 1xMet-loss+Acetyl [N-Term]	PREDICTED: uncharacterized protein LOC104883495 [Beta vulgaris subsp. vulgaris]	731372366	1	2943.31	26		188.3		218.7		93.8	61.3	222.2	125.7	90		3.16747e+06		1.87045e+06		1.29898e+06	434756	2.22184e+06	1.54126e+06	1.06233e+06		3.16747e+06		3.67789e+06			1.57776e+06
FALSE		High	Unambiguous	MAANASTEEPIPTSAVLMASSK	[-].MAANASTEEPIPTSAVLMASSK.[H]	1xMet-loss+Acetyl [N-Term]	1xMet-loss+Acetyl [N-Term]	1.14987e-05	5.33751e-05	1.851	1	1	12	731357289	731357289 [1-22]	731357289 1xMet-loss+Acetyl [N-Term]	731357289 1xMet-loss+Acetyl [N-Term]	PREDICTED: NADH dehydrogenase [ubiquinone] 1 alpha subcomplex subunit 8-B [Beta vulgaris subsp. vulgaris]	731357289	0	2117.04	22	385.5	202.6	6.3	29.6	80.3	35.2	74.3	27.3	71.2	87.7	9.46179e+06	1.01054e+07	194143	749705	780487	1.44552e+06	1.56441e+06	810123	2.58979e+06	3.06848e+06	1.92288e+07	1.01054e+07	313979	1.47416e+06	4.00411e+06		1.75575e+06
FALSE		High	Unambiguous	MAAESSAQSSSTLPLQDR	[-].MAAESSAQSSSTLPLQDR.[V]	1xMet-loss+Acetyl [N-Term]	1xMet-loss+Acetyl [N-Term]	2.11344e-07	5.33751e-05	2.712	1	1	4	731322754	731322754 [1-18]	731322754 1xMet-loss+Acetyl [N-Term]	731322754 1xMet-loss+Acetyl [N-Term]	PREDICTED: short-chain type dehydrogenase/reductase [Beta vulgaris subsp. vulgaris]	731322754	0	1789.86	18	434.9	177.5		26.5	20.8	56.9	44.6	45.6	84.1	109.2	4.71456e+06	3.91123e+06		296976	89194.8	1.03224e+06	414239	597030	1.35032e+06	1.68885e+06	9.58122e+06	3.91123e+06		583950	457593		1.25377e+06
FALSE		High	Unambiguous	MAAEEGIISGTDLPVKRPR	[-].MAAEEGIISGTDLPVKRPR.[E]	1xMet-loss+Acetyl [N-Term]	1xMet-loss+Acetyl [N-Term]	1.1582e-06	5.33751e-05	2.346	1	1	21	731342805	731342805 [1-19]	731342805 1xMet-loss+Acetyl [N-Term]	731342805 1xMet-loss+Acetyl [N-Term]	PREDICTED: spermidine synthase 1 [Beta vulgaris subsp. vulgaris]	731342805	1	1951.06	19	201.1	112.1	20.9	89	50.1	103	132	140.6	49.4	101.9	9.7763e+06	1.10758e+07	1.27456e+06	4.46883e+06	963695	8.37251e+06	5.50134e+06	8.25275e+06	3.55704e+06	7.06629e+06	1.9868e+07	1.10758e+07	2.06129e+06	8.78713e+06	4.94401e+06		1.01694e+07
FALSE		High	Unambiguous	MAAEEGIISGTDLPVK	[-].MAAEEGIISGTDLPVK.[R]	1xMet-loss+Acetyl [N-Term]	1xMet-loss+Acetyl [N-Term]	5.71473e-07	5.33751e-05	2.498	1	1	12	731342805	731342805 [1-16]	731342805 1xMet-loss+Acetyl [N-Term]	731342805 1xMet-loss+Acetyl [N-Term]	PREDICTED: spermidine synthase 1 [Beta vulgaris subsp. vulgaris]	731342805	0	1541.81	16	90.9	9.7	0.5	36	63.5	112.4	92.8	156.6	177.8	259.8	2.75876e+06	597137	20009.4	1.12722e+06	762846	5.70506e+06	2.41287e+06	5.73824e+06	7.9931e+06	1.12418e+07	5.60653e+06	597137	32360.5	2.21647e+06	3.9136e+06		6.92946e+06
FALSE		High	Unambiguous	MAADNEKVVYPIK	[-].MAADNEKVVYPIK.[T]	1xMet-loss+Acetyl [N-Term]	1xMet-loss+Acetyl [N-Term]	1.1931e-05	5.33751e-05	1.843	1	1	3	731360652	731360652 [1-13]	731360652 1xMet-loss+Acetyl [N-Term]	731360652 1xMet-loss+Acetyl [N-Term]	PREDICTED: non-specific phospholipase C4 [Beta vulgaris subsp. vulgaris]	731360652	1	1388.74	13	307	95.6		43.4	23.6	88.6	103.6	59.7	108.5	169.9	3.19141e+06	2.02103e+06		466724	97315.5	1.54097e+06	923996	749436	1.67152e+06	2.5203e+06	6.48579e+06	2.02103e+06		917726	499255		1.87169e+06
FALSE		High	Unambiguous	MAADGTVALAVR	[-].MAADGTVALAVR.[Q]	1xMet-loss+Acetyl [N-Term]	1xMet-loss+Acetyl [N-Term]	1.86409e-05	5.33751e-05	1.746	1	1	7	731328521	731328521 [1-12]	731328521 1xMet-loss+Acetyl [N-Term]	731328521 1xMet-loss+Acetyl [N-Term]	PREDICTED: ankyrin-1 [Beta vulgaris subsp. vulgaris]	731328521	0	1085.59	12	294		186.2	13.2	12.8	82	19.1	100.4	84.2	208.2	17080628		1.35974e+07	790424	293689	7.96689e+06	954056	7.0435e+06	7.24475e+06	1.72542e+07	3.47123e+07		2.19905e+07	1.55422e+06	1.5067e+06		9.67671e+06
FALSE		High	Unambiguous	MAAAQGVCLNHIAR	[-].MAAAQGVCLNHIAR.[E]	1xCarbamidomethyl [C8]; 1xMet-loss+Acetyl [N-Term]	1xCarbamidomethyl [C8]; 1xMet-loss+Acetyl [N-Term]	3.47876e-05	5.33751e-05	1.609	1	3	4	731364761	731364761 [1-14]	731364761 1xMet-loss+Acetyl [N-Term]	731364761 1xMet-loss+Acetyl [N-Term]	PREDICTED: uncharacterized protein LOC104907007 isoform X1 [Beta vulgaris subsp. vulgaris]	731364761; 1108796262; 1108796272	0	1422.73	14	8.4	193.8	2.2	31.3	26.2	234.5	79.5	96.3	166.2	161.7	48472.5	2.2696e+06	15634.8	186455	59834.6	2.26084e+06	392661	669991	1.41838e+06	1.32846e+06	98508.9	2.2696e+06	25285.6	366631	306967		2.74605e+06
FALSE		High	Unambiguous	MAAAPEKWFR	[-].MAAAPEKWFR.[G]	1xMet-loss+Acetyl [N-Term]	1xMet-loss+Acetyl [N-Term]	7.73561e-05	5.33751e-05	1.428	1	1	47	731342073	731342073 [1-10]	731342073 1xMet-loss+Acetyl [N-Term]	731342073 1xMet-loss+Acetyl [N-Term]	PREDICTED: ribonuclease TUDOR 2 [Beta vulgaris subsp. vulgaris]	731342073	1	1117.58	10	230.1	136.8	80.6	39	171.1	38.3	72.6	71.6	84.3	75.7	5.3188e+07	6.42862e+07	2.34085e+07	9.3125e+06	1.56697e+07	1.48076e+07	1.43866e+07	1.99832e+07	2.88795e+07	2.49546e+07	1.08092e+08	6.42862e+07	3.78576e+07	1.83113e+07	8.03898e+07		1.79855e+07
FALSE		High	Unambiguous	MAAANAPIVMK	[-].MAAANAPIVMK.[E]	1xMet-loss+Acetyl [N-Term]	1xMet-loss+Acetyl [N-Term]	5.39028e-05	5.33751e-05	1.511	2	2	10	731314999; 731348509	731314999 [1-11]; 731348509 [1-11]	731314999 1xMet-loss+Acetyl [N-Term]; 731348509 1xMet-loss+Acetyl [N-Term]	731314999 1xMet-loss+Acetyl [N-Term]; 731348509 1xMet-loss+Acetyl [N-Term]	PREDICTED: clathrin heavy chain 1 [Beta vulgaris subsp. vulgaris] PREDICTED: clathrin heavy chain 1 [Beta vulgaris subsp. vulgaris]	731314999; 731348509	0	1027.56	11	1	92.2	4.4	28.9	27.8	169.5	168.4	199.6	178	130.2	89550.4	1.62323e+07	479981	2.58808e+06	952539	2.4567e+07	1.25163e+07	2.08907e+07	2.28514e+07	1.60939e+07	181990	1.62323e+07	776253	5.08898e+06	4.88678e+06		2.98395e+07
FALSE		High	Unambiguous	MAAAIETAIGQGR	[K].MAAAIETAIGQGR.[L]			4.47322e-06	5.33751e-05	2.055	1	1	4	731349358	731349358 [829-841]			PREDICTED: protein TIC110, chloroplastic [Beta vulgaris subsp. vulgaris]	731349358	0	1288.67	13	334.3	284.1	52.6	58	168.6			19.3	57.7	25.4	4.06269e+06	7.01756e+06	803379	728592	811514			283712	1.03922e+06	440709	8.25646e+06	7.01756e+06	1.29927e+06	1.43264e+06	4.16329e+06
FALSE		High	Unambiguous	MAAESASAIQR	[-].MAAESASAIQR.[S]	1xMet-loss+Acetyl [N-Term]	1xMet-loss+Acetyl [N-Term]	2.13864e-05	5.33751e-05	1.716	1	1	7	731328472	731328472 [1-11]	731328472 1xMet-loss+Acetyl [N-Term]	731328472 1xMet-loss+Acetyl [N-Term]	PREDICTED: PITH domain-containing protein At3g04780 [Beta vulgaris subsp. vulgaris]	731328472	0	1045.53	11	200.9	202.4	36.1	21.3	16		206.9	172.3	97.8	46.5	9.42537e+06	1.93e+07	2.12606e+06	1.03319e+06	297573		8326551	9.76454e+06	6.79657e+06	3109312	1.91548e+07	1.93e+07	3.43839e+06	2.03158e+06	1.52663e+06
FALSE		High	Unambiguous	MAAADVEYR	[-].MAAADVEYR.[C]	1xMet-loss+Acetyl [N-Term]	1xMet-loss+Acetyl [N-Term]	7.60419e-05	5.33751e-05	1.432	1	1	33	731358686	731358686 [1-9]	731358686 1xMet-loss+Acetyl [N-Term]	731358686 1xMet-loss+Acetyl [N-Term]	PREDICTED: glycine-rich RNA-binding protein 7 [Beta vulgaris subsp. vulgaris]	731358686	0	936.442	9	221.7	163.2	1.6	51.1	32.4	80.9	138.1	95.3	131.6	84.1	7.6984e+07	1.15184e+08	681787	1.83509e+07	4.46258e+06	4.7014e+07	4.11431e+07	4.00006e+07	6.77133e+07	4.16389e+07	1.56452e+08	1.15184e+08	1.10263e+06	3.60837e+07	2.28942e+07		5.7104e+07
FALSE		High	Unambiguous	MAANLEDVPSVDLMTELLR	[-].MAANLEDVPSVDLMTELLR.[R]	1xMet-loss+Acetyl [N-Term]	1xMet-loss+Acetyl [N-Term]	2.6295e-07	5.33751e-05	2.665	1	1	37	731333772	731333772 [1-19]	731333772 1xMet-loss+Acetyl [N-Term]	731333772 1xMet-loss+Acetyl [N-Term]	PREDICTED: adenylate kinase 4 [Beta vulgaris subsp. vulgaris]	731333772	0	2028.03	19	169.3	212	50.7	81	232.3	50.8	34.6	59.3	64.5	45.5	20870105	5.31124e+07	7.85842e+06	1.03258e+07	1.13444e+07	1.04827e+07	3.65247e+06	8.82474e+06	11782068	7.99555e+06	4.24135e+07	5.31124e+07	1.27091e+07	2.03039e+07	5.81998e+07		1.27324e+07
FALSE		High	Unambiguous	MAAPDLLFNLR	[-].MAAPDLLFNLR.[N]	1xMet-loss+Acetyl [N-Term]	1xMet-loss+Acetyl [N-Term]	5.78379e-05	5.33751e-05	1.495	1	1	25	731370400	731370400 [1-11]	731370400 1xMet-loss+Acetyl [N-Term]	731370400 1xMet-loss+Acetyl [N-Term]	PREDICTED: coatomer subunit epsilon-1 [Beta vulgaris subsp. vulgaris]	731370400	0	1171.65	11	151.8	179.4	13.1	98.1	66.1	67.4	64.6	163	122.4	74.1	10304507	2.47505e+07	1.11928e+06	6.88231e+06	1.77866e+06	7.65861e+06	3.76026e+06	1.33697e+07	1.23061e+07	7.1714e+06	2.09415e+07	2.47505e+07	1.81016e+06	1.35328e+07	9.12498e+06		9.30227e+06
FALSE		High	Unambiguous	IGLFGGAGVGKTVLIMELINNVAKAHGGFSVFAGVGER	[K].IGLFGGAGVGKTVLIMELINNVAKAHGGFSVFAGVGER.[T]	1xOxidation [M16]; 2xGG [K11; K24]	1xOxidation [M16]; 2xGG [K11; K24]	0.000222635	9.51359e-05	1.17	1	1	2	731341013	731341013 [224-261]			PREDICTED: ATP synthase subunit beta, mitochondrial [Beta vulgaris subsp. vulgaris]	731341013	2	4030.13	38
FALSE		High	Unambiguous	MAATATLSSVEAEKLEK	[-].MAATATLSSVEAEKLEK.[L]	1xMet-loss+Acetyl [N-Term]	1xMet-loss+Acetyl [N-Term]	9.96738e-09	5.33751e-05	3.369	1	1	50	731366257	731366257 [1-17]	731366257 1xMet-loss+Acetyl [N-Term]	731366257 1xMet-loss+Acetyl [N-Term]	PREDICTED: UTP--glucose-1-phosphate uridylyltransferase [Beta vulgaris subsp. vulgaris]	731366257	1	1689.89	17	221.3	175.6	23.2	56.2	41.6	107.7	88	90.4	89.9	105.9	1.01447e+08	1.63613e+08	1.33556e+07	2.66383e+07	7.56221e+06	8.26191e+07	3.46025e+07	5.00592e+07	6.10767e+07	6.9205e+07	2.06166e+08	1.63613e+08	2.15994e+07	5.23793e+07	3.87961e+07		1.0035e+08
FALSE		High	Unambiguous	MAATAPAAAVHSVQCFGR	[-].MAATAPAAAVHSVQCFGR.[K]	1xCarbamidomethyl [C15]; 1xMet-loss+Acetyl [N-Term]	1xCarbamidomethyl [C15]; 1xMet-loss+Acetyl [N-Term]	1.02018e-08	5.33751e-05	3.364	1	1	49	731355399	731355399 [1-18]	731355399 1xMet-loss+Acetyl [N-Term]	731355399 1xMet-loss+Acetyl [N-Term]	PREDICTED: 40S ribosomal protein S16 [Beta vulgaris subsp. vulgaris]	731355399	0	1755.86	18	107	201.5	19.4	95.9	80.2	120	74.4	73.1	88.6	139.9	2.14353e+07	8.20622e+07	4.89305e+06	1.98486e+07	6.36594e+06	4.0217e+07	1.27833e+07	1.76817e+07	2.63022e+07	3.99905e+07	4.35622e+07	8.20622e+07	7.91333e+06	3.90286e+07	3.2659e+07		4.88482e+07
FALSE		High	Unambiguous	MAASVQQAQGVNQLSNKEK	[-].MAASVQQAQGVNQLSNKEK.[A]	1xMet-loss+Acetyl [N-Term]	1xMet-loss+Acetyl [N-Term]	5.78587e-09	5.33751e-05	3.486	1	1	14	731326017	731326017 [1-19]	731326017 1xMet-loss+Acetyl [N-Term]	731326017 1xMet-loss+Acetyl [N-Term]	PREDICTED: jasmonate-induced protein homolog [Beta vulgaris subsp. vulgaris]	731326017	1	1942	19	235.4	373.8	1.2	38.4	18.8	79.5	127.2	22.5	35.5	67.6	7.20846e+06	2.32584e+07	44707.3	1.21591e+06	228193	4.0731e+06	3.3393e+06	832472	1.61052e+06	2.95277e+06	1.46495e+07	2.32584e+07	72303.2	2.39086e+06	1.17069e+06		4.94725e+06
FALSE		High	Unambiguous	MAASVQQAQGVNQLSNK	[-].MAASVQQAQGVNQLSNK.[E]	1xMet-loss+Acetyl [N-Term]	1xMet-loss+Acetyl [N-Term]	3.5742e-05	5.33751e-05	1.603	1	1	5	731326017	731326017 [1-17]	731326017 1xMet-loss+Acetyl [N-Term]	731326017 1xMet-loss+Acetyl [N-Term]	PREDICTED: jasmonate-induced protein homolog [Beta vulgaris subsp. vulgaris]	731326017	0	1684.86	17		194.6				174.9	169.7	100.2	114.9	245.6		1.64943e+06				1.22084e+06	606988	505034	710383	1.46152e+06		1.64943e+06					1.48286e+06
FALSE		High	Unambiguous	MAASTENNSNSSSSHSLSSVYLSDMAEVKK	[-].MAASTENNSNSSSSHSLSSVYLSDMAEVKK.[V]	1xMet-loss+Acetyl [N-Term]	1xMet-loss+Acetyl [N-Term]	9.1381e-07	5.33751e-05	2.397	1	1	4	731311858	731311858 [1-30]	731311858 1xMet-loss+Acetyl [N-Term]	731311858 1xMet-loss+Acetyl [N-Term]	PREDICTED: calcium-binding allergen Ole e 8 [Beta vulgaris subsp. vulgaris]	731311858	1	3072.41	30	97.2	302.5	143.2	151.3	177			51.8	41.9	35.2	754310	4771959	1.39633e+06	1213797	544123			485462	482265	389658	1.53296e+06	4771959	2.25823e+06	2.38671e+06	2.79149e+06
FALSE		High	Unambiguous	MAASTENNSNSSSSHSLSSVYLSDMAEVK	[-].MAASTENNSNSSSSHSLSSVYLSDMAEVK.[K]	1xMet-loss+Acetyl [N-Term]	1xMet-loss+Acetyl [N-Term]	5.58811e-06	5.33751e-05	2.007	1	1	2	731311858	731311858 [1-29]	731311858 1xMet-loss+Acetyl [N-Term]	731311858 1xMet-loss+Acetyl [N-Term]	PREDICTED: calcium-binding allergen Ole e 8 [Beta vulgaris subsp. vulgaris]	731311858	0	2944.31	29		304		43	128	78.1		212.1	194	40.9		2.7507e+06		197815	225812	581862		1.14099e+06	1.27961e+06	259653		2.7507e+06		388967	1.15848e+06		706739
FALSE		High	Unambiguous	MAASSARDENVYMAK	[-].MAASSARDENVYMAK.[L]	1xMet-loss+Acetyl [N-Term]	1xMet-loss+Acetyl [N-Term]	9.36896e-08	5.33751e-05	2.887	1	2	41	731339703	731339703 [1-15]	731339703 1xMet-loss+Acetyl [N-Term]	731339703 1xMet-loss+Acetyl [N-Term]	PREDICTED: 14-3-3 protein 2 isoform X2 [Beta vulgaris subsp. vulgaris]	731339703; 731339701	1	1554.72	15	161.9	109.6	3.4	50.6	41.1	109.4	150.2	110.3	137.4	126	6.92998e+07	95373932	1.82978e+06	2.23825e+07	6.97666e+06	7.83449e+07	5.51497e+07	5.70615e+07	8.71529e+07	7.6909e+07	1.40835e+08	95373932	2.95923e+06	4.40111e+07	3.57921e+07		9.51589e+07
FALSE		High	Unambiguous	MAANLEDVPSVDLMTELLRR	[-].MAANLEDVPSVDLMTELLRR.[M]	1xMet-loss+Acetyl [N-Term]	1xMet-loss+Acetyl [N-Term]	5.59235e-08	5.33751e-05	2.998	1	1	68	731333772	731333772 [1-20]	731333772 1xMet-loss+Acetyl [N-Term]	731333772 1xMet-loss+Acetyl [N-Term]	PREDICTED: adenylate kinase 4 [Beta vulgaris subsp. vulgaris]	731333772	1	2184.13	20	62.6	131.7	92.6	159.5	80.2	67.5	125.2	116.7	114.6	49.4	1.79687e+07	7.68817e+07	3.34297e+07	4.73336e+07	9.12559e+06	3.24395e+07	3.08452e+07	4.04993e+07	4.87755e+07	2.02259e+07	3.65172e+07	7.68817e+07	5.40645e+07	9.30728e+07	4.68167e+07		3.94015e+07
FALSE		High	Unambiguous	MAASAMVLDPKPIPPPPSSSSEPPPALSLTSSDDSSSPEEEDLYGRLK	[-].MAASAMVLDPKPIPPPPSSSSEPPPALSLTSSDDSSSPEEEDLYGRLK.[S]	1xMet-loss+Acetyl [N-Term]	1xMet-loss+Acetyl [N-Term]	8.86063e-08	5.33751e-05	2.899	1	1	2	731346572	731346572 [1-48]	731346572 1xMet-loss+Acetyl [N-Term]	731346572 1xMet-loss+Acetyl [N-Term]	PREDICTED: 26S protease regulatory subunit 6B homolog [Beta vulgaris subsp. vulgaris]	731346572	1	4891.37	48	800.9	199.1									6.02415e+06	3.04376e+06									1.22427e+07	3.04376e+06
FALSE		High	Unambiguous	MAAQQVLNDEEQAIFDELISAASK	[-].MAAQQVLNDEEQAIFDELISAASK.[E]	1xMet-loss+Acetyl [N-Term]	1xMet-loss+Acetyl [N-Term]	3.79007e-09	5.33751e-05	3.577	1	1	16	731352543	731352543 [1-24]	731352543 1xMet-loss+Acetyl [N-Term]	731352543 1xMet-loss+Acetyl [N-Term]	PREDICTED: uncharacterized protein LOC104901703 [Beta vulgaris subsp. vulgaris]	731352543	0	2532.25	24	131.6	49.7	132.8	102.1	144.2	33.1	85.2	186.8	32.1	102.3	1.6162e+07	1.24138e+07	2.04919e+07	1.29626e+07	7.01177e+06	6.80166e+06	8.97027e+06	2.77156e+07	5.83455e+06	17922479	3.28454e+07	1.24138e+07	3.31406e+07	2.54885e+07	3.59722e+07		8.26141e+06
FALSE		High	Unambiguous	MAAQQAHGAHQLSNKEK	[-].MAAQQAHGAHQLSNKEK.[A]	1xMet-loss+Acetyl [N-Term]	1xMet-loss+Acetyl [N-Term]	7.9453e-06	5.33751e-05	1.931	1	1	2	731326029	731326029 [1-17]	731326029 1xMet-loss+Acetyl [N-Term]	731326029 1xMet-loss+Acetyl [N-Term]	PREDICTED: uncharacterized protein LOC104890135 [Beta vulgaris subsp. vulgaris]	731326029	1	1759.88	17	101.8		136.6	159.3	337.2	74.2		17.6	173.3		1.32179e+06		2.22859e+06	2137033	1.73419e+06	1611463		275285	3.33292e+06		2.68623e+06		3.60421e+06	4.20208e+06	8.89688e+06		1.95731e+06
FALSE		High	Unambiguous	MAAQNQGDLFDSYFR	[-].MAAQNQGDLFDSYFR.[R]	1xMet-loss+Acetyl [N-Term]	1xMet-loss+Acetyl [N-Term]	1.55844e-05	5.33751e-05	1.785	1	2	4	731358082	731358082 [1-15]	731358082 1xMet-loss+Acetyl [N-Term]	731358082 1xMet-loss+Acetyl [N-Term]	PREDICTED: epidermal growth factor receptor substrate 15-like 1 isoform X1 [Beta vulgaris subsp. vulgaris]	731358082; 731358084	0	1673.76	15		832.8				167.2						2512130				415218						2512130					504331
FALSE		High	Unambiguous	MAAQAMEGVAVTALR	[-].MAAQAMEGVAVTALR.[S]	1xMet-loss+Acetyl [N-Term]	1xMet-loss+Acetyl [N-Term]	6.23096e-05	5.33751e-05	1.478	1	1	3	731329697	731329697 [1-15]	731329697 1xMet-loss+Acetyl [N-Term]	731329697 1xMet-loss+Acetyl [N-Term]	PREDICTED: proline synthase co-transcribed bacterial homolog protein [Beta vulgaris subsp. vulgaris]	731329697	0	1429.75	15	178.2		167.3			152.6		264.3	167.9	69.7	478689		564757			685962		857765	668108	267176	972822		913358				833181
FALSE		High	Unambiguous	MAAPVQAEEEYLDVLTK	[-].MAAPVQAEEEYLDVLTK.[T]	1xMet-loss+Acetyl [N-Term]	1xMet-loss+Acetyl [N-Term]	6.20379e-05	5.33751e-05	1.479	1	1	3	731352006	731352006 [1-17]	731352006 1xMet-loss+Acetyl [N-Term]	731352006 1xMet-loss+Acetyl [N-Term]	PREDICTED: nudix hydrolase 3 [Beta vulgaris subsp. vulgaris]	731352006	0	1817.92	17	62.6	97.1	118.1	122.4	138.3		58.6	199.6	118.9	84.5	422604	1.3319e+06	1.00134e+06	854090	369642		339303	1.6273e+06	1.18847e+06	813046	858842	1.3319e+06	1.61942e+06	1.67941e+06	1.89636e+06
FALSE		High	Unambiguous	MAAPPSLSEQYSLPNDEKPVESK	[-].MAAPPSLSEQYSLPNDEKPVESK.[A]	1xMet-loss+Acetyl [N-Term]	1xMet-loss+Acetyl [N-Term]	2.15844e-06	5.33751e-05	2.212	1	1	23	731312704	731312704 [1-23]	731312704 1xMet-loss+Acetyl [N-Term]	731312704 1xMet-loss+Acetyl [N-Term]	PREDICTED: cytochrome c oxidase subunit 6b-1 [Beta vulgaris subsp. vulgaris]	731312704	0	2428.19	23	224.7	270.5		2.7	15	76.3	78.2	68.8	115.9	147.8	1.19715e+07	29293142		147874	315732	6.80301e+06	3.57364e+06	4.431e+06	9.14917e+06	1.12346e+07	2.43292e+07	29293142		290767	1.61979e+06		8.26304e+06
FALSE		High	Unambiguous	MAAPIDTFLFTSESVNEGHPDKMCDQISDAVLDACLAQDPESK	[-].MAAPIDTFLFTSESVNEGHPDKMCDQISDAVLDACLAQDPESK.[V]	2xCarbamidomethyl [C24; C35]; 1xMet-loss+Acetyl [N-Term]	2xCarbamidomethyl [C24; C35]; 1xMet-loss+Acetyl [N-Term]	9.43595e-05	5.33751e-05	1.381	1	1	19	731327415	731327415 [1-43]	731327415 1xMet-loss+Acetyl [N-Term]	731327415 1xMet-loss+Acetyl [N-Term]	PREDICTED: S-adenosylmethionine synthase 1 [Beta vulgaris subsp. vulgaris]	731327415	1	4664.11	43		369.7		137.8	80.8	34.8	70.9	169.5	101.7	34.8		1.28843e+08		2.44224e+07	5.49167e+06	9.99135e+06	1.04207e+07	35103945	2.58461e+07	8.50622e+06		1.28843e+08		4.80221e+07	2.81737e+07		1.21357e+07
FALSE		High	Unambiguous	MAAPIDTFLFTSESVNEGHPDK	[-].MAAPIDTFLFTSESVNEGHPDK.[M]	1xMet-loss+Acetyl [N-Term]	1xMet-loss+Acetyl [N-Term]	2.44157e-05	5.33751e-05	1.687	1	1	7	731327415	731327415 [1-22]	731327415 1xMet-loss+Acetyl [N-Term]	731327415 1xMet-loss+Acetyl [N-Term]	PREDICTED: S-adenosylmethionine synthase 1 [Beta vulgaris subsp. vulgaris]	731327415	0	2317.1	22		233		102	37	47.9	40.7	274.2	159.1	106		4758358		1.05988e+06	147292	806287	350889	3329443	2.36993e+06	1.51978e+06		4758358		2.08406e+06	755648		979329
FALSE		High	Unambiguous	MAASALKEQANQTEEVEEEFKRPSR	[K].MAASALKEQANQTEEVEEEFKRPSR.[V]			4.00196e-06	5.33751e-05	2.079	1	3	6	731321657	731321657 [1667-1691]			PREDICTED: glutamate synthase 1 [NADH], chloroplastic isoform X1 [Beta vulgaris subsp. vulgaris]	731321663; 731321657; 731321661	2	2878.4	25	10.5	41.1	4.1	185.9	527.4	139.4	3.2	17.3	17.4	53.7	442762	3518604	215868	8.08637e+06	8.79408e+06	9819021	115291	879234	1.08643e+06	3.22618e+06	899808	3518604	349114	1.59004e+07	4.5116e+07		1.19263e+07
FALSE		High	Unambiguous	LYMPYGEGVTFHQR	[R].LYMPYGEGVTFHQR.[L]			2.33575e-06	5.33751e-05	2.195	1	1	4	731344289	731344289 [194-207]			PREDICTED: UDP-glycosyltransferase 79B9 [Beta vulgaris subsp. vulgaris]	731344289	0	1697.81	14			3.4	253.4	518.3	27.8	49.6	50.2	31.6	65.8			40664.7	2.51509e+06	1.97202e+06	447129	408558	581944	449306	900776			65765.4	4.94546e+06	1.0117e+07		543090
FALSE		High	Unambiguous	TILFAVPGAFTPTCSQK	[K].TILFAVPGAFTPTCSQK.[H]	1xCarbamidomethyl [C14]; 1xGG [T1]	1xCarbamidomethyl [C14]; 1xGG [T1]	0.000373752	0.000126394	1.052	1	1	1	731345378	731345378 [100-116]			PREDICTED: peroxiredoxin-2E, chloroplastic [Beta vulgaris subsp. vulgaris]	731345378	0	1951.99	17
FALSE		High	Unambiguous	MAAAAPAAAVHSVQCFGR	[-].MAAAAPAAAVHSVQCFGR.[K]	1xCarbamidomethyl [C15]; 1xMet-loss+Acetyl [N-Term]	1xCarbamidomethyl [C15]; 1xMet-loss+Acetyl [N-Term]	2.44473e-08	5.33751e-05	3.176	1	1	36	731316521	731316521 [1-18]	731316521 1xMet-loss+Acetyl [N-Term]	731316521 1xMet-loss+Acetyl [N-Term]	PREDICTED: 40S ribosomal protein S16 [Beta vulgaris subsp. vulgaris]	731316521	0	1725.85	18	90.6	183.7	12.5	59.6	84	127.2	93.2	92	125	132.3	8.77466e+06	3.61621e+07	1.52316e+06	5.96652e+06	3.22194e+06	2.06188e+07	7.74111e+06	1.07692e+07	1.79423e+07	1.82828e+07	1.78324e+07	3.61621e+07	2.46334e+06	1.17321e+07	1.65294e+07		2.50439e+07
FALSE		High	Unambiguous	LYRPGSVGFVSK	[K].LYRPGSVGFVSK.[S]			3.51438e-06	5.33751e-05	2.107	1	1	49	731322146	731322146 [164-175]			PREDICTED: ATP-citrate synthase beta chain protein 2 [Beta vulgaris subsp. vulgaris]	731322146	0	1309.73	12	104	148.8	63.2	99.6	49	78.9	127.8	96.9	115.5	116.4	3.07484e+07	8.93648e+07	23459951	3.04285e+07	5.73077e+06	3.90078e+07	3.23839e+07	3.45945e+07	5.05511e+07	4.90514e+07	6.24888e+07	8.93648e+07	3.79408e+07	5.9832e+07	2.94004e+07		4.73795e+07
FALSE		High	Unambiguous	LYRFDKEGNQWK	[K].LYRFDKEGNQWK.[E]			2.09028e-05	5.33751e-05	1.721	1	1	14	731355927	731355927 [53-64]			PREDICTED: ran-binding protein 1 homolog a [Beta vulgaris subsp. vulgaris]	731355927	2	1583.8	12	45.9	108.5		243.9	29.7	169.8	129.4	60.5	89.5	122.8	1.92033e+06	9.23349e+06		1.05522e+07	492032	1.18941e+07	4.64544e+06	3.06179e+06	5.54993e+06	7335197	3.90261e+06	9.23349e+06		2.07489e+07	2.52426e+06		1.44467e+07
FALSE		High	Unambiguous	LYQVEYAMEAIGNAGSAIGILAK	[R].LYQVEYAMEAIGNAGSAIGILAK.[D]	1xOxidation [M8]	1xOxidation [M8]	5.53655e-06	5.33751e-05	2.009	2	2	4	731316538; 731334651	731316538 [18-40]; 731334651 [18-40]			PREDICTED: proteasome subunit alpha type-4 [Beta vulgaris subsp. vulgaris] PREDICTED: proteasome subunit alpha type-4 [Beta vulgaris subsp. vulgaris]	731316538; 731334651	0	2398.23	23	47.5		13.1	127.9	334.4	174.9	112.2	51.5	29.9	108.4	423764		147262	1.17862e+06	1.18112e+06	2.60887e+06	858014	554894	394814	1.37872e+06	861200		238160	2.31753e+06	6.05945e+06		3.16878e+06
FALSE		High	Unambiguous	LYQVEYAMEAIGNAGSAIGILAK	[R].LYQVEYAMEAIGNAGSAIGILAK.[D]			7.83855e-10	5.33751e-05	3.916	2	2	47	731316538; 731334651	731316538 [18-40]; 731334651 [18-40]			PREDICTED: proteasome subunit alpha type-4 [Beta vulgaris subsp. vulgaris] PREDICTED: proteasome subunit alpha type-4 [Beta vulgaris subsp. vulgaris]	731316538; 731334651	0	2382.24	23	72.6	61	258.8	54.6	23.4	87.5	174.7	108.1	66.8	92.8	1.96938e+07	3.36072e+07	8.82104e+07	1.52991e+07	2.51023e+06	3.97293e+07	4.06325e+07	3.54115e+07	2.68374e+07	3.58972e+07	4.0023e+07	3.36072e+07	1.42659e+08	3.00829e+07	1.28782e+07		4.82559e+07
FALSE		High	Unambiguous	LYQPVHLLVGTPGR	[R].LYQPVHLLVGTPGR.[I]			6.09623e-05	5.33751e-05	1.483	2	2	8	731331115; 731311969	731331115 [264-277]; 731311969 [260-273]			PREDICTED: DEAD-box ATP-dependent RNA helicase 8-like [Beta vulgaris subsp. vulgaris] PREDICTED: DEAD-box ATP-dependent RNA helicase 8 [Beta vulgaris subsp. vulgaris]	731331115; 731311969	0	1549.88	14	43.7	66.7	147.2	155.7	33.3	63.9	69.6	86.3	49.9	283.6	1.13456e+06	3.52159e+06	4.80758e+06	4.18181e+06	343238	2.77966e+06	1.5498e+06	2.70952e+06	1.9214e+06	1.05093e+07	2.30573e+06	3.52159e+06	7.7751e+06	8.22275e+06	1.7609e+06		3.37622e+06
FALSE		High	Unambiguous	LYQMQANGTLLFPAINVNDSVTK	[R].LYQMQANGTLLFPAINVNDSVTK.[S]	1xOxidation [M4]	1xOxidation [M4]	3.23611e-05	5.33751e-05	1.625	1	1	9	731325197	731325197 [215-237]			PREDICTED: adenosylhomocysteinase [Beta vulgaris subsp. vulgaris]	731325197	0	2553.3	23	42.7	15.5		146.1	199.8	15.4		92.9	186.8	300.8	477653	351885		1.68822e+06	885012	287232		1.25432e+06	3.09472e+06	4.79693e+06	970716	351885		3.31957e+06	4.54035e+06		348877
FALSE		High	Unambiguous	LYQMQANGTLLFPAINVNDSVTK	[R].LYQMQANGTLLFPAINVNDSVTK.[S]			1.17992e-06	5.33751e-05	2.342	1	1	42	731325197	731325197 [215-237]			PREDICTED: adenosylhomocysteinase [Beta vulgaris subsp. vulgaris]	731325197	0	2537.31	23	234.4	242.9	13.8	113.5	49.4	27.6	30.4	140.9	84.5	62.5	4.59987e+07	9.68686e+07	3.40639e+06	2.30113e+07	3.84116e+06	9.07553e+06	5.10906e+06	3.33866e+07	2.45675e+07	1.74995e+07	9.34814e+07	9.68686e+07	5.50902e+06	4.52475e+07	1.97062e+07		1.10233e+07
FALSE		High	Unambiguous	LYQLAEAAHLKDKISR	[R].LYQLAEAAHLKDKISR.[M]			0.000111271	5.33751e-05	1.341	1	1	3	731333012	731333012 [65-80]			PREDICTED: glucose-6-phosphate isomerase, cytosolic [Beta vulgaris subsp. vulgaris]	731333012	2	1856.04	16	132.5	111.4		319.6	244.6	11.2	15.5	114	51.2		2149050	3.67317e+06		5.35789e+06	1.57157e+06	303843	215866	2.23477e+06	1.23064e+06		4.36743e+06	3.67317e+06		1.05353e+07	8.0626e+06		369052
FALSE		High	Unambiguous	IYSFEEADSAYQHLSQGSIIGR	[K].IYSFEEADSAYQHLSQGSIIGR.[A]			7.97395e-09	5.33751e-05	3.417	1	1	23	731328635	731328635 [421-442]			PREDICTED: uncharacterized protein LOC104891196 [Beta vulgaris subsp. vulgaris]	731328635	0	2471.18	22	57.6	95.4	51.4	51	66.3	127.2	76.5	242.7	113.5	118.5	4578187	1.54129e+07	5.133e+06	4.18581e+06	2.08894e+06	1.69161e+07	5.21128e+06	2.33017e+07	13363523	1.34339e+07	9.30408e+06	1.54129e+07	8.30138e+06	8.23063e+06	1.07168e+07		2.05465e+07
FALSE		High	Unambiguous	LYQLAEAAHLKDK	[R].LYQLAEAAHLKDK.[I]			4.55697e-06	5.33751e-05	2.051	1	1	15	731333012	731333012 [65-77]			PREDICTED: glucose-6-phosphate isomerase, cytosolic [Beta vulgaris subsp. vulgaris]	731333012	1	1499.82	13	46.9	46.7	61.6	417.4	154.3	40.7	55.1	53.5	37.1	86.5	3.92841e+06	7.94872e+06	6.47778e+06	3.61095e+07	5.11779e+06	5.70393e+06	3.95889e+06	5.41303e+06	4.60587e+06	1.03276e+07	7.98357e+06	7.94872e+06	1.04762e+07	7.10028e+07	2.62556e+07		6.92808e+06
FALSE		High	Unambiguous	LYPTQDTTMDPTFAK	[R].LYPTQDTTMDPTFAK.[S]			3.53073e-06	5.33751e-05	2.106	1	1	14	731313633	731313633 [213-227]			PREDICTED: peroxidase 12 [Beta vulgaris subsp. vulgaris]	731313633	0	1728.81	15	32.6	70.1	91.7	84.9	74.4	134.4	171.9	146.9	80.2	112.9	592232	2.58595e+06	2.09411e+06	1.59338e+06	535123	4.08366e+06	2.67784e+06	3.2242e+06	2.1589e+06	2.92553e+06	1.20357e+06	2.58595e+06	3.38671e+06	3.13309e+06	2.74533e+06		4.96007e+06
FALSE		High	Unambiguous	LYPTQDSNMDKTFANNLK	[R].LYPTQDSNMDKTFANNLK.[L]	1xOxidation [M9]	1xOxidation [M9]	1.76424e-05	5.33751e-05	1.758	1	1	2	731313641	731313641 [217-234]			PREDICTED: peroxidase 12 [Beta vulgaris subsp. vulgaris]	731313641	1	2116	18		25.8	43.1							931.1		563941	582156							1.42739e+07		563941	941496
FALSE		High	Unambiguous	LYPTQDSNMDKTFANNLK	[R].LYPTQDSNMDKTFANNLK.[L]			4.57196e-07	5.33751e-05	2.546	1	1	54	731313641	731313641 [217-234]			PREDICTED: peroxidase 12 [Beta vulgaris subsp. vulgaris]	731313641	1	2100.01	18	21.7	115.9	29.8	92	127.9	134.8	97.1	97.1	133.3	150.5	6.26962e+06	6.79404e+07	1.0787e+07	2.74237e+07	1.46104e+07	6.50635e+07	2.40093e+07	3.38302e+07	5.69911e+07	6.19343e+07	1.27415e+07	6.79404e+07	1.74453e+07	5.39236e+07	7.49553e+07		7.90272e+07
FALSE		High	Unambiguous	LYPTQDPTMDQTFANNLK	[R].LYPTQDPTMDQTFANNLK.[L]			6.45118e-06	5.33751e-05	1.976	1	1	11	731313635	731313635 [216-233]			PREDICTED: peroxidase 12 [Beta vulgaris subsp. vulgaris]	731313635	0	2097	18	121.6	188.9	2.3	36.3	36.8	102.2	116.7	148.3	158	89	4.46596e+06	1.41047e+07	105915	1.37859e+06	535007	6.28002e+06	3.67839e+06	6.58304e+06	8.60029e+06	4.66272e+06	9.076e+06	1.41047e+07	171292	2.71074e+06	2.74473e+06		7.62781e+06
FALSE		High	Unambiguous	LYPTQDPIMDQTFANNLR	[R].LYPTQDPIMDQTFANNLR.[L]			4.79545e-06	5.33751e-05	2.04	1	1	43	731313637	731313637 [216-233]			PREDICTED: peroxidase 12 [Beta vulgaris subsp. vulgaris]	731313637	0	2137.04	18	85.9	136.8	6.4	108.3	59.3	109.7	120.3	99	159.3	115	7.61388e+06	2.46508e+07	714109	9.93083e+06	2.08386e+06	1.62819e+07	9.14805e+06	1.06108e+07	2.09265e+07	1.45443e+07	1.54734e+07	2.46508e+07	1.1549e+06	1.95272e+07	1.06907e+07		1.97763e+07
FALSE		High	Unambiguous	LYPQDATMDQTFAK	[R].LYPQDATMDQTFAK.[N]			3.04342e-06	5.33751e-05	2.138	1	1	14	731313639	731313639 [216-229]			PREDICTED: peroxidase 12 [Beta vulgaris subsp. vulgaris]	731313639	0	1628.76	14	52.3	126.8	1.4	5.1	22.9	134.3	162.9	160	189.2	145.1	1.29634e+06	6.38727e+06	43393.8	130685	224705	5.56729e+06	3.46151e+06	4.78962e+06	6944598	5.12638e+06	2.6345e+06	6.38727e+06	70179	256969	1.1528e+06		6.76213e+06
FALSE		High	Unambiguous	LYPNVDFYSGLIYR	[K].LYPNVDFYSGLIYR.[A]			7.50694e-05	5.33751e-05	1.435	1	1	5	731356945	731356945 [423-436]			PREDICTED: citrate synthase, glyoxysomal [Beta vulgaris subsp. vulgaris]	731356945	0	1719.87	14	49.3	117.7	46.3	163.3	48.9	205	185.1	49.1	37.4	97.8	448674	2.17492e+06	529579	1.53545e+06	176168	3.11994e+06	1.44353e+06	539334	504626	1.26895e+06	911823	2.17492e+06	856466	3.01917e+06	903791		3.78953e+06
FALSE		High	Unambiguous	IYNNMQKPAFVFDGR	[K].IYNNMQKPAFVFDGR.[N]			1.86033e-06	5.33751e-05	2.244	1	1	27	731347914	731347914 [434-448]			PREDICTED: UDP-glucose 6-dehydrogenase 5 [Beta vulgaris subsp. vulgaris]	731347914	0	1799.89	15	43.8	70.1	241.6	134.2	185.6	65.5	52	71.4	67.4	68.4	2.68074e+06	8.72418e+06	1.85983e+07	8.49478e+06	4.50401e+06	6.71668e+06	2.7315e+06	5.28075e+06	6.11233e+06	5.97336e+06	5.44797e+06	8.72418e+06	3.00783e+07	1.67034e+07	2.31068e+07		8.15819e+06
FALSE		High	Unambiguous	IYQEMPRWEETVLGSR	[R].IYQEMPRWEETVLGSR.[S]			7.53923e-05	5.33751e-05	1.434	1	2	13	731360956	731360956 [145-160]			PREDICTED: uncharacterized protein LOC104905306 isoform X1 [Beta vulgaris subsp. vulgaris]	1108781640; 731360956	1	1993.98	16	169.3	60.4	10.7	164	102.4	227.9	50.3	78.4	99.2	37.4	4.05487e+06	2.9402e+06	321942	4.06083e+06	971097	9.13176e+06	1.03282e+06	2.26863e+06	3.51986e+06	1.27859e+06	8.24056e+06	2.9402e+06	520663	7.98488e+06	4.98199e+06		1.10916e+07
FALSE		High	Unambiguous	MAAAAVANGDIFAAK	[-].MAAAAVANGDIFAAK.[S]	1xMet-loss+Acetyl [N-Term]	1xMet-loss+Acetyl [N-Term]	1.36273e-06	5.33751e-05	2.311	1	1	33	731350936	731350936 [1-15]	731350936 1xMet-loss+Acetyl [N-Term]	731350936 1xMet-loss+Acetyl [N-Term]	PREDICTED: pyrophosphate--fructose 6-phosphate 1-phosphotransferase subunit beta [Beta vulgaris subsp. vulgaris]	731350936	0	1331.7	15	269.6	188.1	9.2	72	62.8	54.8	100.9	85.2	86.2	71.1	3.27511e+07	4.64357e+07	1.39921e+06	9.0366e+06	3.02309e+06	1.11374e+07	1.05095e+07	1.25095e+07	1.5519e+07	1.23246e+07	6.65587e+07	4.64357e+07	2.26288e+06	1.77688e+07	1.55092e+07		1.35277e+07
FALSE		High	Unambiguous	LYSFSTTAAQDPSINSAYAAQLQR	[R].LYSFSTTAAQDPSINSAYAAQLQR.[Q]			1.13406e-05	5.33751e-05	1.854	1	1	11	731321372	731321372 [215-238]			PREDICTED: peroxidase 5-like [Beta vulgaris subsp. vulgaris]	731321372	0	2603.27	24	213.9	277.8		56.5	56.9	46.3	45.3	113.2	111.3	78.7	3.87494e+06	1.0228e+07		1.05862e+06	408441	1.40224e+06	703664	2.47626e+06	2.98701e+06	2.03437e+06	7.8749e+06	1.0228e+07		2.08159e+06	2.09541e+06		1.70318e+06
FALSE		High	Unambiguous	LYSLDAGTIIHALCFSPNRYWLCAATESGIK	[R].LYSLDAGTIIHALCFSPNRYWLCAATESGIK.[I]	2xCarbamidomethyl [C14; C23]	2xCarbamidomethyl [C14; C23]	7.90271e-05	5.33751e-05	1.423	1	1	3	731334235	731334235 [228-258]			PREDICTED: guanine nucleotide-binding protein subunit beta-like protein [Beta vulgaris subsp. vulgaris]	731334235	1	3527.75	31		64.1	86.4	193			128.1	214.7	286.2	27.6		1.79835e+06	1.50016e+06	2.75541e+06			1.51701e+06	3.58281e+06	5.85688e+06	544474		1.79835e+06	2.42615e+06	5.418e+06
FALSE		High	Unambiguous	IYYLPLSEEKVSAVLEAR	[R].IYYLPLSEEKVSAVLEAR.[R]			6.85042e-07	5.33751e-05	2.459	1	1	15	731338962	731338962 [694-711]			PREDICTED: formin-like protein 5 [Beta vulgaris subsp. vulgaris]	731338962	1	2080.13	18	293.6	101.2	3.8	229.8	72.1	91.8	59.4	67.5	34.1	46.6	1.09383e+07	7.66316e+06	178427	8.84884e+06	1.06416e+06	5.7226e+06	1.89604e+06	3.03872e+06	1.88076e+06	2475620	2.22295e+07	7.66316e+06	288563	1.73996e+07	5.4594e+06		6.95077e+06
FALSE		High	Unambiguous	IYYLPLSEEK	[R].IYYLPLSEEK.[V]			8.7868e-05	5.33751e-05	1.398	1	1	5	731338962	731338962 [694-703]			PREDICTED: formin-like protein 5 [Beta vulgaris subsp. vulgaris]	731338962	0	1254.66	10			136.6		617.6	88.2	89.6	26.6		41.4			1.43703e+06		2.04874e+06	1.23587e+06	643677	268831		494228			2.32406e+06		1.05106e+07		1.50111e+06
FALSE		High	Unambiguous	IYYKYEGVSPSGSHKPNSAVPQVWYNAQEGVK	[R].IYYKYEGVSPSGSHKPNSAVPQVWYNAQEGVK.[K]			0.000112182	5.33751e-05	1.339	1	2	4	731330893	731330893 [187-218]			PREDICTED: uncharacterized protein LOC104892214 isoform X1 [Beta vulgaris subsp. vulgaris]	1108919219; 731330893	1	3582.77	32	17.4	19.5	0.5	230.7	583.5	23.8		18	43.3	63.4	316695	724809	10432.4	4.35075e+06	4.21864e+06	725558		395808	1.1703e+06	1.65165e+06	643608	724809	16871.9	8.55496e+06	2.16427e+07		881275
FALSE		High	Unambiguous	IYVYDGLYTIQDSWIDKAK	[K].IYVYDGLYTIQDSWIDKAK.[S]			1.31912e-06	5.33751e-05	2.318	1	1	12	731365708	731365708 [365-383]			PREDICTED: histone-lysine N-methyltransferase, H3 lysine-9 specific SUVH1 [Beta vulgaris subsp. vulgaris]	731365708	1	2291.16	19		125.3	102.6	107	98.2	64.6	1.3	175.5	147.9	177.7		7330552	3.71251e+06	3.18447e+06	1.12015e+06	3.11235e+06	32070.8	6104191	6.3093e+06	7.29807e+06		7330552	6.00409e+06	6.26168e+06	5.74668e+06		3.78031e+06
FALSE		High	Unambiguous	LYVTYYCPFAQR	[R].LYVTYYCPFAQR.[A]	1xCarbamidomethyl [C7]	1xCarbamidomethyl [C7]	1.23224e-05	5.33751e-05	1.836	1	1	103	731349336	731349336 [30-41]			PREDICTED: protein IN2-1 homolog B [Beta vulgaris subsp. vulgaris]	731349336	0	1580.76	12	48.3	89.7	51.9	103	89.9	48.7	51.3	237.2	143	136.8	2.29858e+07	8.6718e+07	3.10394e+07	5.06299e+07	1.69285e+07	3.87187e+07	2.09008e+07	1.36269e+08	1.0077e+08	9.28088e+07	4.67132e+07	8.6718e+07	5.01987e+07	9.95545e+07	8.68479e+07		4.70283e+07
FALSE		High	Unambiguous	IYVRDVLDTK	[K].IYVRDVLDTK.[K]			0.000107254	5.33751e-05	1.35	2	2	35	731350558; 1108961635	731350558 [405-414]; 1108961635 [405-414]			PREDICTED: polyphenol oxidase, chloroplastic [Beta vulgaris subsp. vulgaris] PREDICTED: polyphenol oxidase, chloroplastic [Beta vulgaris subsp. vulgaris]	731350558; 1108961635	1	1221.68	10	212.6	141.5	35.9	193.8	170.8	40	30.2	49.9	58.9	66.4	58927450	7.96748e+07	12498937	5.55145e+07	1.87455e+07	18549401	7.1699e+06	1.67211e+07	2.41718e+07	2.62448e+07	1.19756e+08	7.96748e+07	2.0214e+07	1.09159e+08	9.61693e+07		2.25304e+07
FALSE		High	Unambiguous	IYVKDVLDTKK	[K].IYVKDVLDTKK.[L]			3.06494e-05	5.33751e-05	1.637	1	1	32	731350564	731350564 [403-413]			PREDICTED: polyphenol oxidase, chloroplastic [Beta vulgaris subsp. vulgaris]	731350564	2	1321.77	11	133.4	75.5	115.5	179.3	190.3	55.7	59.7	43.8	52	94.8	4.00057e+07	4.60005e+07	4.35468e+07	5.55675e+07	2.26126e+07	2.79419e+07	1.53636e+07	1.58748e+07	2.31085e+07	4.05658e+07	8.1302e+07	4.60005e+07	7.04264e+07	1.09263e+08	1.16009e+08		3.39387e+07
FALSE		High	Unambiguous	IYVKDVLDTK	[K].IYVKDVLDTK.[K]			4.01764e-05	5.33751e-05	1.577	1	1	91	731350564	731350564 [403-412]			PREDICTED: polyphenol oxidase, chloroplastic [Beta vulgaris subsp. vulgaris]	731350564	1	1193.68	10	224.6	121.4	181	91.1	77.9	40.1	52.8	73.8	69.9	67.4	2.74247e+08	3.01329e+08	2.77709e+08	1.1492e+08	3.76941e+07	8.1919e+07	5.53252e+07	1.08909e+08	1.26541e+08	1.17322e+08	5.57342e+08	3.01329e+08	4.49127e+08	2.2597e+08	1.93381e+08		9.95002e+07
FALSE		High	Unambiguous	LYSLDAGTIIHALCFSPNR	[R].LYSLDAGTIIHALCFSPNR.[Y]	1xCarbamidomethyl [C14]	1xCarbamidomethyl [C14]	3.66332e-08	5.33751e-05	3.089	1	1	52	731334235	731334235 [228-246]			PREDICTED: guanine nucleotide-binding protein subunit beta-like protein [Beta vulgaris subsp. vulgaris]	731334235	0	2148.09	19	1.9	88.8	138.6	138	47	195.5	85.6	114.3	81.4	108.6	418210	3.91529e+07	3.77769e+07	3.09321e+07	4.0387e+06	7.09484e+07	1.59235e+07	2.99447e+07	2.61685e+07	3.36032e+07	849913	3.91529e+07	6.1095e+07	6.08222e+07	2.07196e+07		8.61751e+07
FALSE		High	Unambiguous	LYVHSATSHGLIGNDSK	[R].LYVHSATSHGLIGNDSK.[K]			4.37068e-06	5.33751e-05	2.06	1	1	6	731360652	731360652 [158-174]			PREDICTED: non-specific phospholipase C4 [Beta vulgaris subsp. vulgaris]	731360652	0	1798.91	17	83.1	56.7	409	188.6	76.6	4.2		53.9	57.6	70.3	2.48665e+06	3.444e+06	1.53724e+07	5.83096e+06	907072	212005		1.94687e+06	2.55267e+06	3.00108e+06	5.05353e+06	3.444e+06	2.48611e+07	1.14655e+07	4.65352e+06		257505
FALSE		High	Unambiguous	LYTGNHGIISLR	[K].LYTGNHGIISLR.[N]			6.70975e-05	5.33751e-05	1.461	1	1	8	731326779	731326779 [177-188]			PREDICTED: alanine--glyoxylate aminotransferase 2 homolog 1, mitochondrial [Beta vulgaris subsp. vulgaris]	731326779	0	1343.74	12	382.5	124.2	8.9	19.6	64.1	99	119.6	38.4	66.8	76.9	8.968e+06	5.91888e+06	260945	473963	595495	3.88548e+06	2.40501e+06	1.08847e+06	2.32118e+06	2.57255e+06	1.82253e+07	5.91888e+06	422015	931961	3.05505e+06		4.71936e+06
FALSE		High	Unambiguous	LYTEATDGSQIETK	[K].LYTEATDGSQIETK.[E]			5.64014e-06	5.33751e-05	2.005	1	1	4	731320929	731320929 [691-704]			PREDICTED: probable alpha,alpha-trehalose-phosphate synthase [UDP-forming] 7 [Beta vulgaris subsp. vulgaris]	731320929	0	1555.75	14	540.7	130.6	2.6		25.2		104.2			196.6	1.60217e+06	786432	9858.6		29606.6		264685			831069	3.25603e+06	786432	15943.9		151890
FALSE		High	Unambiguous	IYSYADTHLICR	[K].IYSYADTHLICR.[K]	1xCarbamidomethyl [C11]	1xCarbamidomethyl [C11]	7.66965e-05	5.33751e-05	1.43	1	1	5	731321012	731321012 [75-86]			PREDICTED: 4-coumarate--CoA ligase 2 [Beta vulgaris subsp. vulgaris]	731321012	0	1511.73	12	13.9	410.6	0.6	8.5	112	59.9	44.3	120.2	84.7	145.3	128454	7737508	7507.74	81064.3	411431	930068	352680	1.34643e+06	1.16368e+06	1.92207e+06	261052	7737508	12142	159398	2.11075e+06		1.12968e+06
FALSE		High	Unambiguous	LYSSVESEIQSALQKAELAANETNR	[R].LYSSVESEIQSALQKAELAANETNR.[A]			4.53589e-06	5.33751e-05	2.052	1	1	1	731345816	731345816 [39-63]			PREDICTED: syntaxin-71 [Beta vulgaris subsp. vulgaris]	731345816	1	2751.38	25	220.2	180.1		331			48.4		155.2	65.1	1.06455e+06	1.76895e+06		1.65367e+06			200564		1.11185e+06	448930	2.16344e+06	1.76895e+06		3.25165e+06
FALSE		High	Unambiguous	IYSSLWNADDWATQGGR	[RK].IYSSLWNADDWATQGGR.[V]			2.18334e-07	5.33751e-05	2.705	2	5	68	731319555; 731312849	731319555 [182-198]; 731312849 [183-199]			PREDICTED: probable xyloglucan endotransglucosylase/hydrolase protein 23 [Beta vulgaris subsp. vulgaris] PREDICTED: probable xyloglucan endotransglucosylase/hydrolase protein 23 [Beta vulgaris subsp. vulgaris]	731333812; 731333814; 731319555; 731319557; 731312849	0	1939.89	17	226.1	212.3	30.9	123.2	65.5	75.9	62.2	68.3	81.5	54	1.46984e+07	2.80417e+07	2.52633e+06	8.28045e+06	1.68777e+06	8.25774e+06	3.46738e+06	5.36002e+06	7.85364e+06	5.00709e+06	2.9871e+07	2.80417e+07	4.08573e+06	1.6282e+07	8.65872e+06		1.003e+07
FALSE		High	Unambiguous	LYSNFGLLYPYGHEELAVCEDVDQVR	[K].LYSNFGLLYPYGHEELAVCEDVDQVR.[G]	1xCarbamidomethyl [C19]	1xCarbamidomethyl [C19]	6.66375e-06	5.33751e-05	1.969	1	1	6	731363237	731363237 [240-265]			PREDICTED: V-type proton ATPase subunit d2 [Beta vulgaris subsp. vulgaris]	731363237	0	3086.46	26		85.7		152.1		383.4	69.1	135.4	90.5	83.9		3.34969e+06		3.02325e+06		12333074	1.1386e+06	3.14527e+06	2576726	2.30042e+06		3.34969e+06		5.94467e+06			1.498e+07
FALSE		High	Unambiguous	LYSINDGQAQALEGELSK	[K].LYSINDGQAQALEGELSK.[G]			9.05356e-07	5.33751e-05	2.399	1	2	12	731324218	731324218 [256-273]			PREDICTED: villin-3 isoform X1 [Beta vulgaris subsp. vulgaris]	731324218; 731324222	0	1935.97	18	39.6	101.1	1.8	102.7	92.1	83.6	26.1	306	151	95.9	1.74372e+06	9048919	101030	4.67295e+06	1.60722e+06	6.16056e+06	987558	1.62773e+07	9.85576e+06	6.0256e+06	3.5437e+06	9048919	163392	9.18849e+06	8.24547e+06		7.48272e+06
FALSE		High	Unambiguous	LYSLDAGTIIHALCFSPNRYWLCAATESGIKIWDLESK	[R].LYSLDAGTIIHALCFSPNRYWLCAATESGIKIWDLESK.[S]	2xCarbamidomethyl [C14; C23]	2xCarbamidomethyl [C14; C23]	7.28433e-05	5.33751e-05	1.442	1	1	2	731334235	731334235 [228-265]			PREDICTED: guanine nucleotide-binding protein subunit beta-like protein [Beta vulgaris subsp. vulgaris]	731334235	2	4399.19	38		300.1			166.4			533.6				1.44862e+06			156553			1.53132e+06				1.44862e+06			803161
FALSE		High	Unambiguous	IYVGNVPYEISAER	[K].IYVGNVPYEISAER.[L]			4.02057e-06	5.33751e-05	2.078	2	2	17	731333018; 731333021	731333018 [161-174]; 731333021 [174-187]			PREDICTED: UBP1-associated protein 2C [Beta vulgaris subsp. vulgaris] PREDICTED: UBP1-associated protein 2C [Beta vulgaris subsp. vulgaris]	731333018; 731333021	0	1609.82	14	110.5	217.6	2.5	130.6	23.2	106.3	124.3	46.9	105.8	132.3	4.45086e+06	1.78016e+07	129012	5.43681e+06	369236	7.16117e+06	4.29158e+06	2.27929e+06	6.31306e+06	7.59666e+06	9.04531e+06	1.78016e+07	208645	1.06905e+07	1.89428e+06		8.69807e+06
FALSE		High	Unambiguous	MAQFNIKDDDVDIVIGALQSDLTSFMNAWKPIFSR	[-].MAQFNIKDDDVDIVIGALQSDLTSFMNAWKPIFSR.[F]	1xMet-loss+Acetyl [N-Term]	1xMet-loss+Acetyl [N-Term]	7.1304e-12	5.33751e-05	4.927	1	1	6	731327761	731327761 [1-35]	731327761 1xMet-loss+Acetyl [N-Term]	731327761 1xMet-loss+Acetyl [N-Term]	PREDICTED: probable UDP-arabinopyranose mutase 5 [Beta vulgaris subsp. vulgaris]	731327761	1	3896.95	35	61.5	330.2		94.1	76.4	329		21.1	23.9	63.9	403564	4.40171e+06		637629	198396	3.6109e+06		167490	231910	597527	820148	4.40171e+06		1.25378e+06	1.01783e+06		4.38586e+06
FALSE		High	Unambiguous	MAQGAKPGEGGELPGHK	[K].MAQGAKPGEGGELPGHK.[V]			4.75118e-06	5.33751e-05	2.042	1	3	11	731321657	731321657 [1090-1106]			PREDICTED: glutamate synthase 1 [NADH], chloroplastic isoform X1 [Beta vulgaris subsp. vulgaris]	731321663; 731321657; 731321661	0	1663.82	17	216.1	45.9	83.2		74.5	93.8	65.5	63.4	354.2	3.3	4.75536e+06	2.05153e+06	2.30149e+06		649683	3.45365e+06	1.23553e+06	1.68527e+06	1.15457e+07	104177	9.66414e+06	2.05153e+06	3.7221e+06		3.33305e+06		4.19486e+06
FALSE		High	Unambiguous	MAQGAKPGEGGELPGHKVIGDIALTR	[K].MAQGAKPGEGGELPGHKVIGDIALTR.[N]			1.04564e-06	5.33751e-05	2.368	1	3	12	731321657	731321657 [1090-1115]			PREDICTED: glutamate synthase 1 [NADH], chloroplastic isoform X1 [Beta vulgaris subsp. vulgaris]	731321663; 731321657; 731321661	1	2602.38	26	284.9	84.4	0.3	91.7	500.2	18.2	4.3			16	7.44093e+06	4482845	8539.46	2.47618e+06	5.1758e+06	796144	96233.4			596850	1.51219e+07	4482845	13810.5	4.86896e+06	2.65532e+07		967009
FALSE		High	Unambiguous	MENQGNLEAQIEALLNVEK	[-].MENQGNLEAQIEALLNVEK.[Q]	1xAcetyl [N-Term]	1xAcetyl [N-Term]	1.37164e-07	5.33751e-05	2.805	1	1	13	731355787	731355787 [1-19]	731355787 1xAcetyl [N-Term]	731355787 1xAcetyl [N-Term]	PREDICTED: 26S proteasome non-ATPase regulatory subunit 12 homolog A [Beta vulgaris subsp. vulgaris]	731355787	0	2185.08	19	140.5	123.5	92.9	166.6	223.3	35	55	48.8	84.9	29.4	6689889	1.19487e+07	5.55981e+06	8.19942e+06	4.21261e+06	2.79202e+06	2.24692e+06	2.80701e+06	5.99049e+06	1.99542e+06	1.35956e+07	1.19487e+07	8.99165e+06	1.61227e+07	2.16118e+07		3.39124e+06
FALSE		High	Unambiguous	TAIEKACPGVVSCADILALAAR	[K].TAIEKACPGVVSCADILALAAR.[D]	2xCarbamidomethyl [C7; C13]; 1xGG [K5]	2xCarbamidomethyl [C7; C13]; 1xGG [K5]	0.000599057	0.000126394	0.96	1	1	2	731338586	731338586 [104-125]			PREDICTED: uncharacterized protein LOC104895554 isoform X2 [Beta vulgaris subsp. vulgaris]	731338586	1	2400.24	22
FALSE		High	Unambiguous	MENLISLVNKIQR	[-].MENLISLVNKIQR.[A]	1xAcetyl [N-Term]	1xAcetyl [N-Term]	1.09295e-05	5.33751e-05	1.862	1	1	9	731311287	731311287 [1-13]	731311287 1xAcetyl [N-Term]	731311287 1xAcetyl [N-Term]	PREDICTED: dynamin-related protein 5A [Beta vulgaris subsp. vulgaris]	731311287	1	1599.89	13	76	222.7	263.6	157.7	38.6	16.9	131.9	36.3	45.4	10.8	2.53807e+06	1.51076e+07	1.10553e+07	5.4383e+06	510783	942571	3.77434e+06	1.46506e+06	2.24722e+06	514503	5.15802e+06	1.51076e+07	1.78793e+07	1.06934e+07	2.62045e+06		1.14486e+06
FALSE		High	Unambiguous	MENLISLVNK	[-].MENLISLVNK.[I]	1xAcetyl [N-Term]	1xAcetyl [N-Term]	2.60244e-05	5.33751e-05	1.673	1	1	22	731311287	731311287 [1-10]	731311287 1xAcetyl [N-Term]	731311287 1xAcetyl [N-Term]	PREDICTED: dynamin-related protein 5A [Beta vulgaris subsp. vulgaris]	731311287	0	1202.64	10	121.1	307.6	2.6	108.3	41.2	54.1	42.4	142.1	122	58.5	4.01335e+06	2.07259e+07	108577	3.71123e+06	540789	3.00285e+06	1.20645e+06	5.6917e+06	5.99049e+06	2.76661e+06	8.15618e+06	2.07259e+07	175596	7.29745e+06	2.77439e+06		3.64731e+06
FALSE		High	Unambiguous	MENKGFFASMTSSLSVFSNAMHR	[K].MENKGFFASMTSSLSVFSNAMHR.[S]			4.69807e-05	5.33751e-05	1.542	1	1	2	731348931	731348931 [8-30]			PREDICTED: oxysterol-binding protein-related protein 3C [Beta vulgaris subsp. vulgaris]	731348931	1	2579.18	23								957.6	42.4									1.53277e+06	83143.4
FALSE		High	Unambiguous	LKFIDTSSK	[K].LKFIDTSSK.[F]	1xGG [K2]	1xGG [K2]	0.000648091	0.000126394	0.946	1	1	1	731338387	731338387 [360-368]			PREDICTED: 60S ribosomal protein L3 [Beta vulgaris subsp. vulgaris]	731338387	1	1152.63	9
FALSE		High	Unambiguous	MELVDAAFPLLK	[K].MELVDAAFPLLK.[G]	1xOxidation [M1]	1xOxidation [M1]	2.14845e-05	5.33751e-05	1.715	1	1	13	733215721	733215721 [56-67]			malate dehydrogenase, cytoplasmic [Beta vulgaris subsp. vulgaris]	733215721	0	1362.73	12		35.1		67.8	178.3	64.1	22.2	76.6	91.1	464.8		1.89896e+06		1.86328e+06	1.87828e+06	2.85402e+06	506551	2.46027e+06	3.592e+06	1.7635e+07		1.89896e+06		3.6638e+06	9.63606e+06		3.46654e+06
FALSE		High	Unambiguous	MELVDAAFPLLK	[K].MELVDAAFPLLK.[G]			1.17128e-05	5.33751e-05	1.847	1	1	78	733215721	733215721 [56-67]			malate dehydrogenase, cytoplasmic [Beta vulgaris subsp. vulgaris]	733215721	0	1346.74	12	87.9	185.8	74.5	127.3	56	83	89.9	113.6	115.1	66.9	5.10361e+07	2.19172e+08	5.4346e+07	7.63576e+07	1.28683e+07	8.06372e+07	4.47269e+07	7.96683e+07	9.89763e+07	5.53446e+07	1.03719e+08	2.19172e+08	8.78915e+07	1.50143e+08	6.60181e+07		9.79433e+07
FALSE		High	Unambiguous	MENQGNLEAQIEALLNVEKQMR	[-].MENQGNLEAQIEALLNVEKQMR.[L]	1xAcetyl [N-Term]	1xAcetyl [N-Term]	1.25923e-06	5.33751e-05	2.328	1	1	2	731355787	731355787 [1-22]	731355787 1xAcetyl [N-Term]	731355787 1xAcetyl [N-Term]	PREDICTED: 26S proteasome non-ATPase regulatory subunit 12 homolog A [Beta vulgaris subsp. vulgaris]	731355787	1	2600.28	22			572.3	256.2			83.4			88.1			2764117	1.01754e+06			274778			483020			4.47029e+06	2.00081e+06
FALSE		High	Unambiguous	MELTLTRPDDWHLHLRDGDLLAAVAPHSAR	[-].MELTLTRPDDWHLHLRDGDLLAAVAPHSAR.[H]	1xAcetyl [N-Term]	1xAcetyl [N-Term]	3.28033e-05	5.33751e-05	1.622	1	1	1	731325160	731325160 [1-30]	731325160 1xAcetyl [N-Term]	731325160 1xAcetyl [N-Term]	PREDICTED: dihydroorotase, mitochondrial isoform X2 [Beta vulgaris subsp. vulgaris]	731325160	1	3448.75	30	1000										3.64757e+06										7.41282e+06
FALSE		High	Unambiguous	MEIQQAELTALLGPDPAPFETLISHLMSSSNEQR	[-].MEIQQAELTALLGPDPAPFETLISHLMSSSNEQR.[S]	1xAcetyl [N-Term]	1xAcetyl [N-Term]	7.32302e-08	5.33751e-05	2.94	1	1	4	731325352	731325352 [1-34]	731325352 1xAcetyl [N-Term]	731325352 1xAcetyl [N-Term]	PREDICTED: importin-5 [Beta vulgaris subsp. vulgaris]	731325352	0	3795.86	34	122.4	288.8	35	107.4	116.9			195.1	49.1	85.3	1.18515e+06	5684803	426537	1.07495e+06	448544			2.28291e+06	704132	1.17811e+06	2.40854e+06	5684803	689822	2.1137e+06	2.30115e+06
FALSE		High	Unambiguous	MEIDSQEYQLSNELRGHEDDAR	[-].MEIDSQEYQLSNELRGHEDDAR.[R]	1xAcetyl [N-Term]	1xAcetyl [N-Term]	9.3185e-05	5.33751e-05	1.384	1	2	2	731358789	731358789 [1-22]	731358789 1xAcetyl [N-Term]	731358789 1xAcetyl [N-Term]	PREDICTED: phospholipase A-2-activating protein isoform X1 [Beta vulgaris subsp. vulgaris]	1108983609; 731358789	1	2677.18	22	433.4	414			47.8				78.8	26	1586603	3.08004e+06			69289.3				427269	135950	3.22439e+06	3.08004e+06			355472
FALSE		High	Unambiguous	MEIASDSLYK	[R].MEIASDSLYK.[A]			5.63319e-05	5.33751e-05	1.501	1	1	16	731344295	731344295 [78-87]			PREDICTED: pyruvate dehydrogenase E1 component subunit alpha, mitochondrial [Beta vulgaris subsp. vulgaris]	731344295	0	1156.56	10	122.6	125.8	10	47.9	85.2	125.6	120.2	122.7	132.5	107.5	6.86923e+06	1.43274e+07	707289	2.77358e+06	1.89119e+06	1.17759e+07	5.77488e+06	8.30337e+06	1.10043e+07	8.59179e+06	1.39601e+07	1.43274e+07	1.14387e+06	5.45375e+06	9.7023e+06		1.43032e+07
FALSE		High	Unambiguous	MEIAQVLTETIDTAENAVVSVK	[-K].MEIAQVLTETIDTAENAVVSVK.[T]			2.43544e-06	5.33751e-05	2.186	1	3	2	731333957	731333957 [56-77]			PREDICTED: uncharacterized protein LOC104893569 isoform X1 [Beta vulgaris subsp. vulgaris]	731333961; 731333959; 731333957	0	2361.22	22	524.2		199.4	87.3			149.8	39.4			1.23472e+06		590237	212558			302548	112052			2.50927e+06		954566	417957
FALSE		High	Unambiguous	MEKNDIKDLIINSIK	[R].MEKNDIKDLIINSIK.[I]			6.59416e-05	5.33751e-05	1.465	1	1	2	731376960	731376960 [21-35]			PREDICTED: NADP-dependent D-sorbitol-6-phosphate dehydrogenase [Beta vulgaris subsp. vulgaris]	731376960	2	1773.98	15	54.4	148.2		240	14.1	528.1				15.2	271491	1.50432e+06		1.23907e+06	27972.5	4412687				108070	551740	1.50432e+06		2.43641e+06	143506		5.35972e+06
FALSE		High	Unambiguous	MEHTSVADIVDDKSTVGGGVR	[-].MEHTSVADIVDDKSTVGGGVR.[D]	1xAcetyl [N-Term]	1xAcetyl [N-Term]	1.31128e-08	5.33751e-05	3.31	1	1	6	731353916	731353916 [1-21]	731353916 1xAcetyl [N-Term]	731353916 1xAcetyl [N-Term]	PREDICTED: NADP-dependent malic enzyme [Beta vulgaris subsp. vulgaris]	731353916	1	2215.07	21		144.1	187.4	45	84.1	29.1	94.7	159.9	122.5	133.2		2.94176e+06	2.36622e+06	467265	334830	488715	815720	1.94128e+06	1.82402e+06	1.90977e+06		2.94176e+06	3.82679e+06	918792	1.71777e+06		593601
FALSE		High	Unambiguous	MEHGSYQNPSSSTFSITEEDHTLANSLR	[-].MEHGSYQNPSSSTFSITEEDHTLANSLR.[L]	1xAcetyl [N-Term]	1xAcetyl [N-Term]	8.47686e-06	5.33751e-05	1.917	1	1	2	1108957668	1108957668 [1-28]	1108957668 1xAcetyl [N-Term]	1108957668 1xAcetyl [N-Term]	PREDICTED: DNA-directed RNA polymerases I and III subunit RPAC2 [Beta vulgaris subsp. vulgaris]	1108957668	0	3180.42	28	638.3	260.9	9.2	91.5							1.68231e+06	1.39763e+06	30483.3	249255							3.41889e+06	1.39763e+06	49299.5	490114
FALSE		High	Unambiguous	MEGVLSQIGHQSSPSPSGTTDQSATELPSTSR	[R].MEGVLSQIGHQSSPSPSGTTDQSATELPSTSR.[G]			2.38856e-08	5.33751e-05	3.181	1	1	1	1108865121	1108865121 [254-285]			PREDICTED: large proline-rich protein BAG6 [Beta vulgaris subsp. vulgaris]	1108865121	0	3272.53	32	140.8	777.6					81.6				289598	3.25076e+06					144020				588539	3.25076e+06
FALSE		High	Unambiguous	MELSSLTQANISLPFITATADGPKHIETTLTR	[K].MELSSLTQANISLPFITATADGPKHIETTLTR.[A]			2.99623e-05	5.33751e-05	1.642	1	1	2	731341153	731341153 [339-370]			PREDICTED: stromal 70 kDa heat shock-related protein, chloroplastic [Beta vulgaris subsp. vulgaris]	731341153	1	3456.8	32	155.8	704.1	65.4				22.5	13.8	29.2	9.1	3.93369e+06	36120608	2.07463e+06				487924	421262	1.09362e+06	326190	7.99429e+06	36120608	3.35521e+06
FALSE		High	Unambiguous	FVGGLAWATDSQALENAFAQYGDVVDSK	[R].FVGGLAWATDSQALENAFAQYGDVVDSK.[V]	1xPhospho [D/E/S/T]; 1xGG [S/T]	1xPhospho [T9; D10; S11; E15]; 1xGG [T9; S11]	0.00088448	0.000154279	0.894	1	1	12	731373041	731373041 [54-81]	731373041 1xPhospho [T62; D63; S64; E68]	731373041 1xPhospho [E/D/T/S]	PREDICTED: glycine-rich RNA-binding protein-like [Beta vulgaris subsp. vulgaris]	731373041	0	3153.42	28
FALSE		High	Unambiguous	MENRDFDSDDHFEDCLIK	[-].MENRDFDSDDHFEDCLIK.[L]	1xAcetyl [N-Term]; 1xCarbamidomethyl [C15]	1xAcetyl [N-Term]; 1xCarbamidomethyl [C15]	3.94614e-05	5.33751e-05	1.581	1	1	3	731311965	731311965 [1-18]	731311965 1xAcetyl [N-Term]	731311965 1xAcetyl [N-Term]	PREDICTED: uncharacterized protein LOC104888641 [Beta vulgaris subsp. vulgaris]	731311965	1	2327.95	18		338.5		61.1	149.7		31.1	172.8	157	89.7		2.61747e+06		240455	225643		101505	794090	885070	487010		2.61747e+06		472811	1.15761e+06
FALSE		High	Unambiguous	MEPAVLDDIINR	[-].MEPAVLDDIINR.[L]	1xAcetyl [N-Term]	1xAcetyl [N-Term]	1.43458e-05	5.33751e-05	1.803	1	1	3	731348802	731348802 [1-12]	731348802 1xAcetyl [N-Term]	731348802 1xAcetyl [N-Term]	PREDICTED: serine/threonine-protein phosphatase PP1 isozyme 2 [Beta vulgaris subsp. vulgaris]	731348802	0	1427.72	12	99.4	292.3	63.1	56.9	109.3	38.4	13	150.4	111.7	65.5	756567	4.5227e+06	603432	448083	329638	489118	84624.3	1383292	1.26036e+06	711337	1.53754e+06	4.5227e+06	975905	881073	1.69113e+06		594090
FALSE		High	Unambiguous	METFLFTSESVNEGHPDKLCDQVSDAVLDACLAQDPESK	[-].METFLFTSESVNEGHPDKLCDQVSDAVLDACLAQDPESK.[V]	1xAcetyl [N-Term]; 2xCarbamidomethyl [C20; C31]	1xAcetyl [N-Term]; 2xCarbamidomethyl [C20; C31]	6.13071e-06	5.33751e-05	1.987	1	1	18	731336846	731336846 [1-39]	731336846 1xAcetyl [N-Term]	731336846 1xAcetyl [N-Term]	PREDICTED: S-adenosylmethionine synthase 2 [Beta vulgaris subsp. vulgaris]	731336846	1	4424.98	39	8.6	382.4	209.8	82.8	2.7		62.2	103.3	93.7	54.6	626886	56957089	1.93191e+07	6.2709e+06	78298		3.90762e+06	9.14404e+06	1.01747e+07	5.70912e+06	1.274e+06	56957089	3.1244e+07	1.23306e+07	401689
FALSE		High	Unambiguous	MESSTALYTQLKEAQPFFVMAGPNVIESEEHIMK	[-].MESSTALYTQLKEAQPFFVMAGPNVIESEEHIMK.[M]	1xAcetyl [N-Term]	1xAcetyl [N-Term]	1.91608e-05	5.33751e-05	1.74	1	1	5	731317255	731317255 [1-34]	731317255 1xAcetyl [N-Term]	731317255 1xAcetyl [N-Term]	PREDICTED: 2-dehydro-3-deoxyphosphooctonate aldolase 1 [Beta vulgaris subsp. vulgaris]	731317255	1	3897.87	34	605.5	394.5									4.33962e+06	5.74601e+06									8.81926e+06	5.74601e+06
FALSE		High	Unambiguous	MESSTALYTQLK	[-].MESSTALYTQLK.[E]	1xAcetyl [N-Term]	1xAcetyl [N-Term]	2.23869e-05	5.33751e-05	1.706	1	1	9	731317255	731317255 [1-12]	731317255 1xAcetyl [N-Term]	731317255 1xAcetyl [N-Term]	PREDICTED: 2-dehydro-3-deoxyphosphooctonate aldolase 1 [Beta vulgaris subsp. vulgaris]	731317255	0	1413.69	12	91.3	209.4	8.6	34.2	39.8	115.6	100.1	169	150.2	81.8	1.88152e+06	8773650	223033	728904	325181	3.98668e+06	1.76895e+06	4.20962e+06	4.58625e+06	2.40452e+06	3.82375e+06	8773650	360702	1.43326e+06	1.66826e+06		4.84229e+06
FALSE		High	Unambiguous	MESSKNEVTPTLFSPYK	[-].MESSKNEVTPTLFSPYK.[L]	1xAcetyl [N-Term]	1xAcetyl [N-Term]	3.63922e-05	5.33751e-05	1.599	1	1	2	731372169	731372169 [1-17]	731372169 1xAcetyl [N-Term]	731372169 1xAcetyl [N-Term]	PREDICTED: 12-oxophytodienoate reductase 3 [Beta vulgaris subsp. vulgaris]	731372169	1	1999.97	17						1000										1.09442e+06											1.32931e+06
FALSE		High	Unambiguous	MESPDSSSYISSPEAHPK	[-].MESPDSSSYISSPEAHPK.[R]	1xAcetyl [N-Term]	1xAcetyl [N-Term]	4.69807e-05	5.33751e-05	1.542	1	2	1	731374939	731374939 [1-18]	731374939 1xAcetyl [N-Term]	731374939 1xAcetyl [N-Term]	PREDICTED: protein BTR1 isoform X1 [Beta vulgaris subsp. vulgaris]	731374939; 731374941	0	1990.87	18
FALSE		High	Unambiguous	MESLINEEFGEVKAK	[-].MESLINEEFGEVKAK.[N]	1xAcetyl [N-Term]	1xAcetyl [N-Term]	3.91019e-06	5.33751e-05	2.084	1	1	8	731314726	731314726 [1-15]	731314726 1xAcetyl [N-Term]	731314726 1xAcetyl [N-Term]	PREDICTED: calcium-transporting ATPase 1, chloroplastic [Beta vulgaris subsp. vulgaris]	731314726	1	1765.87	15	187.7	105.5		349.8	114.2	23.5	74.8	77	36.8	30.7	4.61861e+06	5.27238e+06		8.89537e+06	1.11334e+06	966876	1.57777e+06	2.28734e+06	1.3421e+06	1.07729e+06	9.38623e+06	5.27238e+06		1.74911e+07	5.71172e+06		1.17438e+06
FALSE		High	Unambiguous	MESLINEEFGEVK	[-].MESLINEEFGEVK.[A]	1xAcetyl [N-Term]	1xAcetyl [N-Term]	1.9426e-05	5.33751e-05	1.737	1	1	11	731314726	731314726 [1-13]	731314726 1xAcetyl [N-Term]	731314726 1xAcetyl [N-Term]	PREDICTED: calcium-transporting ATPase 1, chloroplastic [Beta vulgaris subsp. vulgaris]	731314726	0	1566.74	13	33.9	171.5		87	92.1	69.1	77.8	249	182.4	37.1	617843	6356747		1.64054e+06	665457	2.10923e+06	1.21696e+06	5.48452e+06	4.92712e+06	965469	1.25562e+06	6356747		3.22582e+06	3.41397e+06		2.5619e+06
FALSE		High	Unambiguous	MESIGVLLACPMNSYLEEELNKR	[-].MESIGVLLACPMNSYLEEELNKR.[Y]	1xAcetyl [N-Term]; 1xCarbamidomethyl [C10]	1xAcetyl [N-Term]; 1xCarbamidomethyl [C10]	3.41788e-06	5.33751e-05	2.113	1	2	3	731359538	731359538 [1-23]	731359538 1xAcetyl [N-Term]	731359538 1xAcetyl [N-Term]	PREDICTED: hydroxyphenylpyruvate reductase isoform X1 [Beta vulgaris subsp. vulgaris]	731359540; 731359538	1	2738.32	23		37.6	129.2	68.1	70.6	140.9	237.6	58.5	257.5			695689	1.47626e+06	639530	254316	2.14345e+06	1.85274e+06	642204	3.46941e+06			695689	2.38749e+06	1.25752e+06	1.30471e+06		2.60347e+06
FALSE		High	Unambiguous	MENSADDAAK	[-].MENSADDAAK.[S]	1xAcetyl [N-Term]	1xAcetyl [N-Term]	9.39666e-05	5.33751e-05	1.382	1	2	1	731323066	731323066 [1-10]	731323066 1xAcetyl [N-Term]	731323066 1xAcetyl [N-Term]	PREDICTED: lysine--tRNA ligase [Beta vulgaris subsp. vulgaris]	731323066; 731323070	0	1093.45	10						167.3	238.6			594.1						582410	425795			1.76341e+06							707404
FALSE		High	Unambiguous	MESELVELFEAAKK	[-].MESELVELFEAAKK.[A]	1xAcetyl [N-Term]	1xAcetyl [N-Term]	8.48327e-07	5.33751e-05	2.413	1	1	11	731323512	731323512 [1-14]	731323512 1xAcetyl [N-Term]	731323512 1xAcetyl [N-Term]	PREDICTED: transcription elongation factor TFIIS [Beta vulgaris subsp. vulgaris]	731323512	1	1665.84	14		88.3	172.6	166.3	66.2	74.1	129.5	85.6	85.4	132		3.77146e+06	4.56076e+06	3.61382e+06	551511	2.60707e+06	2.33478e+06	2.17412e+06	2.6607e+06	3.95763e+06		3.77146e+06	7.37593e+06	7.10592e+06	2.8294e+06		3.16659e+06
FALSE		High	Unambiguous	MESEGILLGMGNPLLDISAVVDDEFLHKYDIK	[-].MESEGILLGMGNPLLDISAVVDDEFLHKYDIK.[L]	1xAcetyl [N-Term]; 1xOxidation [M10]	1xAcetyl [N-Term]; 1xOxidation [M10]	2.28723e-07	5.33751e-05	2.695	1	1	9	731334184	731334184 [1-32]	731334184 1xAcetyl [N-Term]	731334184 1xAcetyl [N-Term]	PREDICTED: adenosine kinase 2 [Beta vulgaris subsp. vulgaris]	731334184	1	3619.79	32		25.1	99.7	8.8	461.8			114	54.7	235.9		1.072e+06	2.63682e+06	192076	3.84837e+06			2.89601e+06	1.70534e+06	7.07839e+06		1.072e+06	4.26441e+06	377682	1.97432e+07
FALSE		High	Unambiguous	MESEGILLGMGNPLLDISAVVDDEFLHKYDIK	[-].MESEGILLGMGNPLLDISAVVDDEFLHKYDIK.[L]	1xAcetyl [N-Term]	1xAcetyl [N-Term]	1.2554e-10	5.33751e-05	4.31	1	1	40	731334184	731334184 [1-32]	731334184 1xAcetyl [N-Term]	731334184 1xAcetyl [N-Term]	PREDICTED: adenosine kinase 2 [Beta vulgaris subsp. vulgaris]	731334184	1	3603.8	32	100	48.2	70.7	87.7	227.2	42	92.1	212.7	63.3	56.1	4.60287e+07	4.50589e+07	4.08799e+07	4.17174e+07	4.1435e+07	3.236e+07	36353697	1.18315e+08	4.3203e+07	3.68585e+07	9.35423e+07	4.50589e+07	6.61134e+07	8.20297e+07	2.12573e+08		3.9305e+07
FALSE		High	Unambiguous	MESEGILLGMGNPLLDISAVVDDEFLHK	[-].MESEGILLGMGNPLLDISAVVDDEFLHK.[Y]	1xAcetyl [N-Term]; 1xOxidation [M10]	1xAcetyl [N-Term]; 1xOxidation [M10]	2.60244e-05	5.33751e-05	1.673	1	1	2	731334184	731334184 [1-28]	731334184 1xAcetyl [N-Term]	731334184 1xAcetyl [N-Term]	PREDICTED: adenosine kinase 2 [Beta vulgaris subsp. vulgaris]	731334184	0	3100.52	28					259.2					740.8					196049					2.01715e+06					1.00578e+06
FALSE		High	Unambiguous	MESEGILLGMGNPLLDISAVVDDEFLHK	[-].MESEGILLGMGNPLLDISAVVDDEFLHK.[Y]	1xAcetyl [N-Term]	1xAcetyl [N-Term]	4.63616e-07	5.33751e-05	2.543	1	1	9	731334184	731334184 [1-28]	731334184 1xAcetyl [N-Term]	731334184 1xAcetyl [N-Term]	PREDICTED: adenosine kinase 2 [Beta vulgaris subsp. vulgaris]	731334184	0	3084.53	28	190.1	42	146.8		167.8	63	73.6	190.3	66.2	60.2	4.18212e+06	1.87566e+06	4.05831e+06		1462530	2317613	1.38854e+06	5.05782e+06	2.15797e+06	1.88818e+06	8.49917e+06	1.87566e+06	6.56333e+06		7.50317e+06		2.81501e+06
FALSE		High	Unambiguous	MEQTFIMIKPDGVQR	[-].MEQTFIMIKPDGVQR.[G]	1xAcetyl [N-Term]	1xAcetyl [N-Term]	5.55756e-07	5.33751e-05	2.504	1	1	83	731360835	731360835 [1-15]	731360835 1xAcetyl [N-Term]	731360835 1xAcetyl [N-Term]	PREDICTED: nucleoside diphosphate kinase 1 [Beta vulgaris subsp. vulgaris]	731360835	0	1834.92	15	217.8	206.2	16.4	85	34.6	70.7	56.8	130.9	113.3	68.4	9.50219e+07	1.82843e+08	9.01074e+06	3.83146e+07	5.97328e+06	5.16009e+07	2.12487e+07	6.90073e+07	7.32234e+07	4.25486e+07	1.93109e+08	1.82843e+08	1.45727e+07	7.53386e+07	3.06445e+07		6.26752e+07
FALSE		High	Unambiguous	MEQLLNLDVTPFTDK	[R].MEQLLNLDVTPFTDK.[I]			8.28308e-06	5.33751e-05	1.922	1	1	2	731372394	731372394 [63-77]			PREDICTED: glutamine synthetase leaf isozyme, chloroplastic [Beta vulgaris subsp. vulgaris]	731372394	0	1763.89	15	76.5	138		61.6	32	33	40	363.5	104.6	150.8	701402	2570269		583298	116101	506645	314766	4024272	1.42058e+06	1.97102e+06	1.42543e+06	2570269		1.14695e+06	595631		615379
FALSE		High	Unambiguous	MEQEAASTQTSVR	[R].MEQEAASTQTSVR.[S]			3.92846e-05	5.33751e-05	1.582	1	1	3	1108865121	1108865121 [319-331]			PREDICTED: large proline-rich protein BAG6 [Beta vulgaris subsp. vulgaris]	1108865121	0	1437.66	13	224.2	284.5	2.7			149.6	304.9			34.2	927738	2.39194e+06	13833.4			1.03545e+06	1081624			201763	1.88541e+06	2.39194e+06	22372.2				1.25768e+06
FALSE		High	Unambiguous	MEPEPSNTGAGNPSEHRK	[-].MEPEPSNTGAGNPSEHRK.[E]	1xAcetyl [N-Term]	1xAcetyl [N-Term]	3.72025e-09	5.33751e-05	3.581	1	1	12	731356662	731356662 [1-18]	731356662 1xAcetyl [N-Term]	731356662 1xAcetyl [N-Term]	PREDICTED: 26S proteasome non-ATPase regulatory subunit 2 homolog A [Beta vulgaris subsp. vulgaris]	731356662	1	1979.89	18	114.5	54.3	0.4	111.2		194.1	280.8	124.4	93.6	26.6	3.18179e+06	3.06622e+06	13692.3	3.19271e+06		9.02314e+06	6.69019e+06	4.17457e+06	3.85371e+06	1.05255e+06	6.46624e+06	3.06622e+06	22144	6.27787e+06			1.09597e+07
FALSE		High	Unambiguous	MESELVELFEAAK	[-].MESELVELFEAAK.[K]	1xAcetyl [N-Term]	1xAcetyl [N-Term]	6.91524e-06	5.33751e-05	1.961	1	1	2	731323512	731323512 [1-13]	731323512 1xAcetyl [N-Term]	731323512 1xAcetyl [N-Term]	PREDICTED: transcription elongation factor TFIIS [Beta vulgaris subsp. vulgaris]	731323512	0	1537.75	13	201.5	277.9	32.2	34.3	421.3				32.7		1.53428e+06	4.30064e+06	308433	270097	1.27079e+06				369048		3.11806e+06	4.30064e+06	498816	531096	6.51951e+06
FALSE		High	Unambiguous	MEVATDELYTPIKQDTK	[K].MEVATDELYTPIKQDTK.[K]			8.88682e-07	5.33751e-05	2.403	1	1	14	731313610	731313610 [118-134]			PREDICTED: soluble inorganic pyrophosphatase 6, chloroplastic [Beta vulgaris subsp. vulgaris]	731313610	1	1981.98	17	119.8	162.4	87.2	74.6	90.4	95.2	27.5	96.7	106.2	140	4.94158e+06	1.36114e+07	4.52165e+06	3.17943e+06	1.47688e+06	6.56825e+06	973336	4.81755e+06	6.49125e+06	8.2397e+06	1.00426e+07	1.36114e+07	7.31269e+06	6.25176e+06	7.57681e+06		7.97791e+06
FALSE		High	Unambiguous	MEGKDEDVRLGANK	[-].MEGKDEDVRLGANK.[F]	1xAcetyl [N-Term]	1xAcetyl [N-Term]	9.88931e-07	5.33751e-05	2.38	1	1	27	733215449	733215449 [1-14]	733215449 1xAcetyl [N-Term]	733215449 1xAcetyl [N-Term]	probable aquaporin PIP1-4 [Beta vulgaris subsp. vulgaris]	733215449	2	1603.77	14	129	59.9	31	76.3	152	90.4	88.1	93.4	148.7	131.2	1.9273e+07	1.81824e+07	5.81984e+06	1.17842e+07	9.00034e+06	2.25906e+07	1.12887e+07	1.68631e+07	3.29319e+07	2.79665e+07	3.91678e+07	1.81824e+07	9.41219e+06	2.31714e+07	4.61742e+07		2.74389e+07
FALSE		High	Unambiguous	MEGGDEGIER	[-].MEGGDEGIER.[M]	1xAcetyl [N-Term]	1xAcetyl [N-Term]	5.63319e-05	5.33751e-05	1.501	1	1	2	731322154	731322154 [1-10]	731322154 1xAcetyl [N-Term]	731322154 1xAcetyl [N-Term]	PREDICTED: huntingtin-interacting protein K [Beta vulgaris subsp. vulgaris]	731322154	0	1134.47	10	336.6	350.3	5.2				36.6	164.3	107.1		1.39815e+06	2957218	26888.5				130331	824561	659230		2.84142e+06	2957218	43485.7
FALSE		High	Unambiguous	MEATAGMVAGSYKR	[-].MEATAGMVAGSYKR.[N]	1xAcetyl [N-Term]	1xAcetyl [N-Term]	3.47876e-05	5.33751e-05	1.609	1	2	5	731320148	731320148 [1-14]	731320148 1xAcetyl [N-Term]	731320148 1xAcetyl [N-Term]	PREDICTED: cellulose synthase A catalytic subunit 1 [UDP-forming] [Beta vulgaris subsp. vulgaris]	731356227; 731320148	1	1513.71	14	90.7	2.7		133.2	48.9	129.6	132.8	278.3	51.8	132	610775	37290.7		926671	130377	1.46019e+06	766883	2.26313e+06	516488	1.26725e+06	1.24125e+06	37290.7		1.82213e+06	668870		1.77357e+06
FALSE		High	Unambiguous	MEASRGQNGIQLLLAAEQEAQHIVNTAKTAK	[-].MEASRGQNGIQLLLAAEQEAQHIVNTAKTAK.[M]	1xAcetyl [N-Term]	1xAcetyl [N-Term]	9.04929e-05	5.33751e-05	1.391	1	1	1	731364932	731364932 [1-31]	731364932 1xAcetyl [N-Term]	731364932 1xAcetyl [N-Term]	PREDICTED: V-type proton ATPase subunit G 1 [Beta vulgaris subsp. vulgaris]	731364932	2	3362.75	31			430.5	416				153.5					419664	333482				143849					678706	655732
FALSE		High	Unambiguous	MEASRGQNGIQLLLAAEQEAQHIVNTAK	[-].MEASRGQNGIQLLLAAEQEAQHIVNTAK.[T]	1xAcetyl [N-Term]	1xAcetyl [N-Term]	4.84068e-11	5.33751e-05	4.515	1	1	5	731364932	731364932 [1-28]	731364932 1xAcetyl [N-Term]	731364932 1xAcetyl [N-Term]	PREDICTED: V-type proton ATPase subunit G 1 [Beta vulgaris subsp. vulgaris]	731364932	1	3062.57	28	319			435.2	160.8				85		1.81811e+06			2.56348e+06	362987				717946		3.69489e+06			5.04061e+06	1.86222e+06
FALSE		High	Unambiguous	MEAQLVERLEKAVSR	[-].MEAQLVERLEKAVSR.[L]	1xAcetyl [N-Term]	1xAcetyl [N-Term]	3.7221e-05	5.33751e-05	1.594	1	1	2	731358704	731358704 [1-15]	731358704 1xAcetyl [N-Term]	731358704 1xAcetyl [N-Term]	PREDICTED: cyclase-associated protein 1 [Beta vulgaris subsp. vulgaris]	731358704	2	1800.96	15				593.5			334.6			72				723632			338472			121077				1.42289e+06
FALSE		High	Unambiguous	MEAQLVERLEK	[-].MEAQLVERLEK.[A]	1xAcetyl [N-Term]	1xAcetyl [N-Term]	1.72708e-06	5.33751e-05	2.26	1	1	25	731358704	731358704 [1-11]	731358704 1xAcetyl [N-Term]	731358704 1xAcetyl [N-Term]	PREDICTED: cyclase-associated protein 1 [Beta vulgaris subsp. vulgaris]	731358704	1	1387.72	11	231.2	119.9	15.6	174.3	141.3	39.2	37.8	95.6	85.2	59.9	2.6585e+07	2.80317e+07	2.26158e+06	2.07135e+07	6.43807e+06	7534794	3.72655e+06	1.3286e+07	1.45147e+07	9.83391e+06	5.40278e+07	2.80317e+07	3.65756e+06	4.07292e+07	3.3029e+07		9.15188e+06
FALSE		High	Unambiguous	MEAQEGSQNEHLILANK	[-].MEAQEGSQNEHLILANK.[I]	1xAcetyl [N-Term]	1xAcetyl [N-Term]	1.43419e-06	5.33751e-05	2.3	1	1	22	731368509	731368509 [1-17]	731368509 1xAcetyl [N-Term]	731368509 1xAcetyl [N-Term]	PREDICTED: 26S proteasome non-ATPase regulatory subunit 6 homolog [Beta vulgaris subsp. vulgaris]	731368509	0	1953.93	17	65.1	124.8	14.1	61	31.6	161.2	166.3	77.4	171.6	127	1.80545e+06	7.03343e+06	492445	1.74755e+06	346900	7.47871e+06	3.95437e+06	2.59191e+06	7.05123e+06	5.02169e+06	3.66915e+06	7.03343e+06	796412	3.43623e+06	1.77969e+06		9.08376e+06
FALSE		High	Unambiguous	MEAPKEIFLK	[-].MEAPKEIFLK.[D]	1xAcetyl [N-Term]	1xAcetyl [N-Term]	5.11169e-05	5.33751e-05	1.523	1	1	3	731331070	731331070 [1-10]	731331070 1xAcetyl [N-Term]	731331070 1xAcetyl [N-Term]	PREDICTED: puromycin-sensitive aminopeptidase-like isoform X2 [Beta vulgaris subsp. vulgaris]	731331070	1	1247.67	10	232	243.8	11.6		17	96.9	79.2		95.7	223.9	3.22902e+06	6.89413e+06	202415		93447	2.25621e+06	945403		1972606	4444378	6.56221e+06	6.89413e+06	327357		479408		2.74043e+06
FALSE		High	Unambiguous	MEALVSTPLAVEDALVGLFDHSDHTLQR	[R].MEALVSTPLAVEDALVGLFDHSDHTLQR.[R]			2.68688e-09	5.33751e-05	3.651	1	3	1	731313961	731313961 [1107-1134]			PREDICTED: acetyl-CoA carboxylase 1 isoform X1 [Beta vulgaris subsp. vulgaris]	731313965; 731313961; 731313963	0	3064.54	28	169.7	69.9			109.2			54.8	261.3	335.1	291666	243938			74314.7			113710	665294	821442	592742	243938			381254
FALSE		High	Unambiguous	MEAVVVDAGSSLLK	[-].MEAVVVDAGSSLLK.[A]	1xAcetyl [N-Term]	1xAcetyl [N-Term]	1.19861e-05	5.33751e-05	1.842	1	2	1	731319928	731319928 [1-14]	731319928 1xAcetyl [N-Term]	731319928 1xAcetyl [N-Term]	PREDICTED: actin-related protein 7 isoform X1 [Beta vulgaris subsp. vulgaris]	1108886280; 731319928	0	1460.77	14		648.4		139.6	103					109		1.97505e+06		216187	61142.7					233130		1.97505e+06		425093	313678
FALSE		High	Unambiguous	MEAIEELSQLSDAMRQAAAVLADEDVDDTSVSSSRR	[-].MEAIEELSQLSDAMRQAAAVLADEDVDDTSVSSSRR.[N]	1xAcetyl [N-Term]	1xAcetyl [N-Term]	9.50053e-08	5.33751e-05	2.884	1	1	3	731341935	731341935 [1-36]	731341935 1xAcetyl [N-Term]	731341935 1xAcetyl [N-Term]	PREDICTED: dynamin-2B [Beta vulgaris subsp. vulgaris]	731341935	2	3937.84	36								1000										3.03497e+06
FALSE		High	Unambiguous	MEAELKELLNDLEDVKR	[-].MEAELKELLNDLEDVKR.[S]	1xAcetyl [N-Term]	1xAcetyl [N-Term]	2.31889e-10	5.33751e-05	4.178	1	1	21	731366971	731366971 [1-17]	731366971 1xAcetyl [N-Term]	731366971 1xAcetyl [N-Term]	PREDICTED: ubiquitin-like modifier-activating enzyme 5 [Beta vulgaris subsp. vulgaris]	731366971	2	2087.07	17	312.4	46.3	158.4	50.2	192.1	19.2	82.2	13.8	59.4	66	4.21041e+07	1.26871e+07	2.68319e+07	6.98947e+06	1.02589e+07	4331021	9.49644e+06	2.25466e+06	1.18566e+07	1.26836e+07	8.55666e+07	1.26871e+07	4.33941e+07	1.37435e+07	5.26308e+07		5.26053e+06
FALSE		High	Unambiguous	MDYVNQAMERLEK	[K].MDYVNQAMERLEK.[N]			8.073e-05	5.33751e-05	1.418	1	1	2	731360180	731360180 [327-339]			PREDICTED: probable cinnamyl alcohol dehydrogenase 1 [Beta vulgaris subsp. vulgaris]	731360180	1	1626.76	13	193.4	287.7	2.1	46	62.7	124.6	26.3	101.2	83.4	72.5	1.14267e+06	3453414	15823.5	280809	146663	1.23197e+06	133296	722282	730116	611120	2.3222e+06	3453414	25590.8	552159	752423		1.49637e+06
FALSE		High	Unambiguous	MDYVNQAMER	[K].MDYVNQAMER.[L]			6.79766e-05	5.33751e-05	1.458	1	1	18	731360180	731360180 [327-336]			PREDICTED: probable cinnamyl alcohol dehydrogenase 1 [Beta vulgaris subsp. vulgaris]	731360180	0	1256.54	10	97.9	60.2	40	48.2	76	134.2	162.3	85.8	185.6	109.7	3.42394e+06	4.27532e+06	1.75817e+06	1.74306e+06	1.05294e+06	7.85425e+06	4.8665e+06	3.62268e+06	9.61742e+06	5.47272e+06	6.95834e+06	4.27532e+06	2.84342e+06	3.42741e+06	5.40188e+06		9.5399e+06
FALSE		High	Unambiguous	MDWGSVTAEDLIDALR	[-].MDWGSVTAEDLIDALR.[E]	1xAcetyl [N-Term]	1xAcetyl [N-Term]	7.69208e-06	5.33751e-05	1.938	1	2	2	731367545	731367545 [1-16]	731367545 1xAcetyl [N-Term]	731367545 1xAcetyl [N-Term]	PREDICTED: PRA1 family protein A1 isoform X2 [Beta vulgaris subsp. vulgaris]	731367541; 731367545	0	1833.87	16		34.7	131.9	158.3		180.5	380.5	114				579502	1.36205e+06	1.34456e+06		2.48166e+06	2.68049e+06	1.13162e+06				579502	2.20279e+06	2.64382e+06			3.01426e+06
FALSE		High	Unambiguous	MDVVQLLQR	[-].MDVVQLLQR.[Q]	1xAcetyl [N-Term]	1xAcetyl [N-Term]	5.73318e-05	5.33751e-05	1.497	1	2	11	731334920	731334920 [1-9]	731334920 1xAcetyl [N-Term]	731334920 1xAcetyl [N-Term]	PREDICTED: histidine-containing phosphotransfer protein 1-like [Beta vulgaris subsp. vulgaris]	731362177; 731334920	0	1143.62	9	163.5	245.5	18.6	87.4	26	72.3	31.6	158.9	150.9	45.2	2.91906e+06	8908582	417990	1.61349e+06	183812	2.16061e+06	484137	3.4271e+06	3.99228e+06	1.15093e+06	5.93229e+06	8908582	675998	3.17264e+06	943003		2.62431e+06
FALSE		High	Unambiguous	MDVIKTQQISSR	[-].MDVIKTQQISSR.[A]	1xAcetyl [N-Term]	1xAcetyl [N-Term]	1.66966e-05	5.33751e-05	1.77	1	1	11	731315128	731315128 [1-12]	731315128 1xAcetyl [N-Term]	731315128 1xAcetyl [N-Term]	PREDICTED: 26S proteasome non-ATPase regulatory subunit 7 homolog A [Beta vulgaris subsp. vulgaris]	731315128	1	1447.76	12	137.9	153.6	3.9	79.1	98	8	131.7	150.3	116.6	120.9	4822772	1.09173e+07	171503	2.86019e+06	1.35781e+06	465736	3.94871e+06	6.35124e+06	6.03919e+06	6.03238e+06	9.80114e+06	1.09173e+07	277365	5.62403e+06	6.96591e+06		565691
FALSE		High	Unambiguous	MDVIDLEDETIDAEILNSMAVTNEHFQTALGQSNPSALR	[K].MDVIDLEDETIDAEILNSMAVTNEHFQTALGQSNPSALR.[E]			1.66201e-05	5.33751e-05	1.771	1	1	1	731345718	731345718 [430-468]			PREDICTED: cell division cycle protein 48 homolog [Beta vulgaris subsp. vulgaris]	731345718	0	4288.04	39	438.6	329.7						170.6		61.1	832434	1.27184e+06						391104		165439	1.69173e+06	1.27184e+06
FALSE		High	Unambiguous	MDVIDLEDETIDAEILNSMAVSNEHFQTALGQSNPSALR	[K].MDVIDLEDETIDAEILNSMAVSNEHFQTALGQSNPSALR.[E]			3.34019e-05	5.33751e-05	1.618	1	2	1	731351877	731351877 [430-468]			PREDICTED: cell division cycle protein 48 homolog [Beta vulgaris subsp. vulgaris]	731351877; 731351875	0	4274.02	39
FALSE		High	Unambiguous	MEAIEELSQLSDAMR	[-].MEAIEELSQLSDAMR.[Q]	1xAcetyl [N-Term]	1xAcetyl [N-Term]	1.03297e-07	5.33751e-05	2.866	1	1	26	731341935	731341935 [1-15]	731341935 1xAcetyl [N-Term]	731341935 1xAcetyl [N-Term]	PREDICTED: dynamin-2B [Beta vulgaris subsp. vulgaris]	731341935	0	1764.81	15	103.7	57.1	74.8	76.8	357.5	35.1	105.6	58.4	81	50.2	1.34016e+07	1.49892e+07	12144211	1.02544e+07	1.83057e+07	7.58469e+06	1.17102e+07	9.11967e+06	1.55151e+07	9.24952e+06	2.72356e+07	1.49892e+07	1.96403e+07	2.01633e+07	9.39132e+07		9.21249e+06
FALSE		High	Unambiguous	MEGKDEDVR	[-].MEGKDEDVR.[L]	1xAcetyl [N-Term]	1xAcetyl [N-Term]	3.02353e-05	5.33751e-05	1.64	1	1	26	733215449	733215449 [1-9]	733215449 1xAcetyl [N-Term]	733215449 1xAcetyl [N-Term]	probable aquaporin PIP1-4 [Beta vulgaris subsp. vulgaris]	733215449	1	1120.49	9	19	16.1	37.6	12.3	19.6	231.5	269.7	77.1	166.4	150.8	6.89434e+06	11871776	1.71704e+07	4.61995e+06	2.82308e+06	1.4081e+08	8.40756e+07	3.38702e+07	8.96278e+07	7.8176e+07	1.40111e+07	11871776	2.7769e+07	9.08428e+06	1.44831e+07		1.7103e+08
FALSE		High	Unambiguous	MECVEEFLKK	[-].MECVEEFLKK.[C]	1xAcetyl [N-Term]; 1xCarbamidomethyl [C3]	1xAcetyl [N-Term]; 1xCarbamidomethyl [C3]	6.94649e-05	5.33751e-05	1.453	1	1	2	731341839	731341839 [1-10]	731341839 1xAcetyl [N-Term]	731341839 1xAcetyl [N-Term]	PREDICTED: methionine S-methyltransferase [Beta vulgaris subsp. vulgaris]	731341839	1	1354.64	10		164.8		164.7	65.6	104.9		372.5	82.8	44.7		1.76613e+06		897740	136995	925746		2.3729e+06	647245	336477		1.76613e+06		1.76524e+06	702818		1.12443e+06
FALSE		High	Unambiguous	MEDGFPADKLFNQGYSYTYDDVIFLPHYIDFSTDSVK	[-].MEDGFPADKLFNQGYSYTYDDVIFLPHYIDFSTDSVK.[L]	1xAcetyl [N-Term]	1xAcetyl [N-Term]	3.44319e-07	5.33751e-05	2.607	1	1	1	731318118	731318118 [1-37]	731318118 1xAcetyl [N-Term]	731318118 1xAcetyl [N-Term]	PREDICTED: inosine-5'-monophosphate dehydrogenase 2 isoform X2 [Beta vulgaris subsp. vulgaris]	731318118	1	4380	37
FALSE		High	Unambiguous	MEGENVEVLEYDKAYEK	[-].MEGENVEVLEYDKAYEK.[Y]	1xAcetyl [N-Term]	1xAcetyl [N-Term]	0.000119711	5.33751e-05	1.323	1	1	2	731324912	731324912 [1-17]	731324912 1xAcetyl [N-Term]	731324912 1xAcetyl [N-Term]	PREDICTED: cytosolic sulfotransferase 17-like [Beta vulgaris subsp. vulgaris]	731324912	1	2087.95	17		717.5					107.8		174.7			1294385					82024.3		229763			1294385
FALSE		High	Unambiguous	MEGECSIAKDVTELVGNTPMVYLNHVIEGCQAR	[-].MEGECSIAKDVTELVGNTPMVYLNHVIEGCQAR.[I]	1xAcetyl [N-Term]; 2xCarbamidomethyl [C5; C30]	1xAcetyl [N-Term]; 2xCarbamidomethyl [C5; C30]	4.89427e-09	5.33751e-05	3.522	1	1	1	731328158	731328158 [1-33]	731328158 1xAcetyl [N-Term]	731328158 1xAcetyl [N-Term]	PREDICTED: cysteine synthase isoform X2 [Beta vulgaris subsp. vulgaris]	731328158	1	3762.76	33
FALSE		High	Unambiguous	MEFTEENLNLLHK	[-].MEFTEENLNLLHK.[I]	1xAcetyl [N-Term]	1xAcetyl [N-Term]	6.60232e-06	5.33751e-05	1.971	1	1	2	731359522	731359522 [1-13]	731359522 1xAcetyl [N-Term]	731359522 1xAcetyl [N-Term]	PREDICTED: uncharacterized protein LOC104904680 [Beta vulgaris subsp. vulgaris]	731359522	0	1659.8	13	265.6	254.3	36	103.6	5.5	30.3	39.2	116.1	63.8	85.6	1.55309e+06	3.02234e+06	264621	626201	12804	296507	196449	820254	552471	714022	3.15628e+06	3.02234e+06	427960	1.23131e+06	65687.9		360142
FALSE		High	Unambiguous	MEFSPRAAELTNLLESR	[-].MEFSPRAAELTNLLESR.[I]			5.34288e-05	5.33751e-05	1.513	1	1	6	162279935	162279935 [1-17]			atp1 gene product (mitochondrion) [Beta vulgaris subsp. vulgaris]	162279935	1	1963.99	17				167	137.1	163.6	99.6	248.4	109.5	74.7				3.92061e+06	1.23432e+06	6.21783e+06	1.94127e+06	6.8184e+06	3.68679e+06	2421187				7.70917e+06	6.33237e+06		7.55228e+06
FALSE		High	Unambiguous	MEENRGSLSFFTTYRPTVK	[-].MEENRGSLSFFTTYRPTVK.[L]	1xAcetyl [N-Term]	1xAcetyl [N-Term]	9.58927e-08	5.33751e-05	2.882	1	1	22	731329889	731329889 [1-19]	731329889 1xAcetyl [N-Term]	731329889 1xAcetyl [N-Term]	PREDICTED: uncharacterized protein LOC104891779 [Beta vulgaris subsp. vulgaris]	731329889	1	2305.13	19	67.9	134.1	61.8	105.4	72.6	60.2	164.1	175.6	79.1	79.2	7226636	2.90136e+07	8.26193e+06	1.1594e+07	3.05954e+06	1.07188e+07	1.49765e+07	2.25722e+07	1.24712e+07	1.20265e+07	1.46864e+07	2.90136e+07	1.33617e+07	2.27974e+07	1.56963e+07		1.30192e+07
FALSE		High	Unambiguous	MEELTSMDFSLLGDAIASK	[-].MEELTSMDFSLLGDAIASK.[S]	1xAcetyl [N-Term]	1xAcetyl [N-Term]	2.58698e-06	5.33751e-05	2.173	1	1	7	731318837	731318837 [1-19]	731318837 1xAcetyl [N-Term]	731318837 1xAcetyl [N-Term]	PREDICTED: COP9 signalosome complex subunit 8 [Beta vulgaris subsp. vulgaris]	731318837	0	2099.99	19	137.6	164.9	110.7	53.9	48.4	98.6	177.8	120.5	79.2	8.4	2.34425e+06	5.70703e+06	2368945	948742	326885	2.81077e+06	2.59662e+06	2.4787e+06	1.99978e+06	203713	4.76413e+06	5.70703e+06	3.8312e+06	1.86553e+06	1.67701e+06		3.41401e+06
FALSE		High	Unambiguous	MEEFSTHTASQVEDGKLSEEKPR	[-].MEEFSTHTASQVEDGKLSEEKPR.[F]	1xAcetyl [N-Term]	1xAcetyl [N-Term]	6.54993e-08	5.33751e-05	2.964	1	1	13	1108898512	1108898512 [1-23]	1108898512 1xAcetyl [N-Term]	1108898512 1xAcetyl [N-Term]	PREDICTED: probable UMP-CMP kinase 2 isoform X2 [Beta vulgaris subsp. vulgaris]	1108898512	1	2677.24	23	112.6	128.4	166.6	163.2	248	10.8	25.4	56.6	39.6	48.9	3437925	7962674	6.391e+06	5.14718e+06	2.99801e+06	549993	663479	2.08637e+06	1.79128e+06	2.12678e+06	6.98677e+06	7962674	1.03359e+07	1.0121e+07	1.53806e+07		668031
FALSE		High	Unambiguous	MEEENPKSMEEETPKSEHPPTSTSDLMASAK	[-].MEEENPKSMEEETPKSEHPPTSTSDLMASAK.[I]	1xAcetyl [N-Term]	1xAcetyl [N-Term]	2.39969e-08	5.33751e-05	3.18	1	1	12	731339253	731339253 [1-31]	731339253 1xAcetyl [N-Term]	731339253 1xAcetyl [N-Term]	PREDICTED: nodulin-related protein 1-like [Beta vulgaris subsp. vulgaris]	731339253	2	3489.53	31	185	138.6	15.3	189.3	278.1	7.7	30.9	63.1	77.3	14.8	4.30174e+06	6.54912e+06	447883	4.54735e+06	2.56103e+06	299354	615086	1.77078e+06	2.66224e+06	490118	8.74227e+06	6.54912e+06	724343	8.94152e+06	1.31388e+07		363601
FALSE		High	Unambiguous	MECVFGLVGDGFAVIAADTSAVNSILVHK	[-].MECVFGLVGDGFAVIAADTSAVNSILVHK.[S]	1xAcetyl [N-Term]; 1xCarbamidomethyl [C3]	1xAcetyl [N-Term]; 1xCarbamidomethyl [C3]	3.97042e-09	5.33751e-05	3.567	1	1	38	731367225	731367225 [1-29]	731367225 1xAcetyl [N-Term]	731367225 1xAcetyl [N-Term]	PREDICTED: proteasome subunit beta type-2-A [Beta vulgaris subsp. vulgaris]	731367225	0	3062.53	29		17.6	120.4	44.3	422	90.1	40	180.5	39	46		2.79612e+06	1.18564e+07	3.58923e+06	1.30962e+07	1.18074e+07	2.68823e+06	1.70822e+07	4.53051e+06	5.14337e+06		2.79612e+06	1.91749e+07	7.05755e+06	6.71872e+07		1.43414e+07
FALSE		High	Unambiguous	MEEELLLKLEEK	[-].MEEELLLKLEEK.[R]	1xAcetyl [N-Term]	1xAcetyl [N-Term]	3.17805e-05	5.33751e-05	1.629	1	1	5	731328336	731328336 [1-12]	731328336 1xAcetyl [N-Term]	731328336 1xAcetyl [N-Term]	PREDICTED: sugar transporter ERD6-like 5 [Beta vulgaris subsp. vulgaris]	731328336	1	1545.81	12			39	180	89.6	237.8	8.7	206.2	155.5	83.2			363207	1.37814e+06	262939	2.94857e+06	55372.1	1.84611e+06	1.70674e+06	879445			587400	2.70986e+06	1.34895e+06		3.58138e+06
FALSE		High	Unambiguous	MEDWEDDSVPQLLKKDQPR	[-].MEDWEDDSVPQLLKKDQPR.[S]	1xAcetyl [N-Term]	1xAcetyl [N-Term]	3.02353e-05	5.33751e-05	1.64	1	1	5	731338023	731338023 [1-19]	731338023 1xAcetyl [N-Term]	731338023 1xAcetyl [N-Term]	PREDICTED: eukaryotic translation initiation factor 3 subunit J [Beta vulgaris subsp. vulgaris]	731338023	2	2371.12	19	359.9	158.2		124.1	24.8		14.1	268.5	18	32.4	7.01057e+06	6263281		2.49892e+06	191267		236206	6.31943e+06	518664	900339	1.42473e+07	6263281		4.91366e+06	981252
FALSE		High	Unambiguous	MEDWEDDSVPQLLKK	[-].MEDWEDDSVPQLLKK.[D]	1xAcetyl [N-Term]	1xAcetyl [N-Term]	1.83021e-05	5.33751e-05	1.75	1	1	13	731338023	731338023 [1-15]	731338023 1xAcetyl [N-Term]	731338023 1xAcetyl [N-Term]	PREDICTED: eukaryotic translation initiation factor 3 subunit J [Beta vulgaris subsp. vulgaris]	731338023	1	1874.88	15	215.3	270.7	0.9	84.1	92.5	48.3	88.9	23.4	128.6	47.4	6.64723e+06	1.69834e+07	35892.9	2.68488e+06	1.13118e+06	2.49563e+06	2.35317e+06	871970	5.88086e+06	2.0879e+06	1.35089e+07	1.69834e+07	58048	5.27933e+06	5.80326e+06		3.03124e+06
FALSE		High	Unambiguous	MEDWEDDSVPQLLK	[-].MEDWEDDSVPQLLK.[K]	1xAcetyl [N-Term]	1xAcetyl [N-Term]	1.54417e-05	5.33751e-05	1.787	1	1	1	731338023	731338023 [1-14]	731338023 1xAcetyl [N-Term]	731338023 1xAcetyl [N-Term]	PREDICTED: eukaryotic translation initiation factor 3 subunit J [Beta vulgaris subsp. vulgaris]	731338023	0	1746.79	14		887.3								112.7		2.99277e+06								266820		2.99277e+06
FALSE		High	Unambiguous	MEDSNHLLELDEISANGVSTNHGWQK	[-].MEDSNHLLELDEISANGVSTNHGWQK.[V]	1xAcetyl [N-Term]	1xAcetyl [N-Term]	3.52958e-08	5.33751e-05	3.097	1	1	9	731367989	731367989 [1-26]	731367989 1xAcetyl [N-Term]	731367989 1xAcetyl [N-Term]	PREDICTED: uncharacterized protein LOC104908484 [Beta vulgaris subsp. vulgaris]	731367989	0	2966.36	26	243.9	195.6	5.3	121.2	171.5	5.4	42.3	145.9	39	30	4860333	7.9207e+06	133465	2.4957e+06	1.35363e+06	180610	722651	3.51301e+06	1.15064e+06	852517	9.87747e+06	7.9207e+06	215848	4.90734e+06	6.94447e+06		219372
FALSE		High	Unambiguous	MEDSGCIAGDYLIYVTTKDPALER	[R].MEDSGCIAGDYLIYVTTKDPALER.[R]	1xCarbamidomethyl [C6]	1xCarbamidomethyl [C6]	1.05051e-06	5.33751e-05	2.367	1	1	12	731329889	731329889 [126-149]			PREDICTED: uncharacterized protein LOC104891779 [Beta vulgaris subsp. vulgaris]	731329889	1	2717.28	24	41.5	44	229	189.2	21.8	113.3	89.9	113.1	123	35.2	1.73098e+06	3.73185e+06	1.19962e+07	8.15283e+06	360024	7.90529e+06	3.21315e+06	5.69717e+06	7.60164e+06	2.09306e+06	3.51781e+06	3.73185e+06	1.9401e+07	1.6031e+07	1.84702e+06		9.60189e+06
FALSE		High	Unambiguous	MEDLEGGVDFLADERKK	[-].MEDLEGGVDFLADERKK.[A]	1xAcetyl [N-Term]	1xAcetyl [N-Term]	1.20415e-05	5.33751e-05	1.841	1	1	4	731332207	731332207 [1-17]	731332207 1xAcetyl [N-Term]	731332207 1xAcetyl [N-Term]	PREDICTED: peroxisomal acyl-coenzyme A oxidase 1 [Beta vulgaris subsp. vulgaris]	731332207	2	1993.95	17	307.4	174.5	4	94.5	178.8		44.4	96.8	66.7	32.9	3.94853e+06	4.55595e+06	64798.1	1.25438e+06	909866		488840	1.50288e+06	1.27022e+06	602941	8.02445e+06	4.55595e+06	104795	2.4665e+06	4.66785e+06
FALSE		High	Unambiguous	MEDLEGGVDFLADER	[-].MEDLEGGVDFLADER.[K]	1xAcetyl [N-Term]	1xAcetyl [N-Term]	3.44975e-06	5.33751e-05	2.111	1	1	11	731332207	731332207 [1-15]	731332207 1xAcetyl [N-Term]	731332207 1xAcetyl [N-Term]	PREDICTED: peroxisomal acyl-coenzyme A oxidase 1 [Beta vulgaris subsp. vulgaris]	731332207	0	1737.76	15	31.9	257.4	69.2	133.6	58	64.1	56.2	168.4	69.4	91.8	500004	8.19247e+06	1.36111e+06	2.16299e+06	360096	1.68084e+06	754938	3.18661e+06	1.6096e+06	2.04982e+06	1.01614e+06	8.19247e+06	2.20127e+06	4.25312e+06	1.84739e+06		2.04158e+06
FALSE		High	Unambiguous	MEDIDDLPKNAANYTPLTPLWFLER	[-].MEDIDDLPKNAANYTPLTPLWFLER.[A]	1xAcetyl [N-Term]	1xAcetyl [N-Term]	6.73519e-08	5.33751e-05	2.958	1	1	10	731322024	731322024 [1-25]	731322024 1xAcetyl [N-Term]	731322024 1xAcetyl [N-Term]	PREDICTED: acetate/butyrate--CoA ligase AAE7, peroxisomal [Beta vulgaris subsp. vulgaris]	731322024	1	3004.48	25	218.4	127.1	79.4	38.1	284.2	6.6	88.2	59.7	75.3	23	5.37755e+06	6.35768e+06	2.45705e+06	968694	2.77132e+06	272841	1.86266e+06	1.77683e+06	2.74566e+06	806459	1.09286e+07	6.35768e+06	3.97369e+06	1.90476e+06	1.42176e+07		331398
FALSE		High	Unambiguous	MEEALELAR	[-].MEEALELAR.[A]	1xAcetyl [N-Term]	1xAcetyl [N-Term]	4.80375e-05	5.33751e-05	1.537	1	1	5	731347294	731347294 [1-9]	731347294 1xAcetyl [N-Term]	731347294 1xAcetyl [N-Term]	PREDICTED: LOW QUALITY PROTEIN: CLIP-associated protein [Beta vulgaris subsp. vulgaris]	731347294	0	1103.54	9	37.7			125.5	91.9	73.5	108.5	323.1	198.7	41.3	211216			726421	203812	688377	521204	2.18615e+06	1.64868e+06	329668	429247			1.42837e+06	1.04561e+06		836114
FALSE		High	Unambiguous	MDTSIQVQR	[-].MDTSIQVQR.[V]	1xAcetyl [N-Term]	1xAcetyl [N-Term]	9.47539e-05	5.33751e-05	1.38	1	1	4	731322096	731322096 [1-9]	731322096 1xAcetyl [N-Term]	731322096 1xAcetyl [N-Term]	PREDICTED: jasmonate-induced protein homolog [Beta vulgaris subsp. vulgaris]	731322096	0	1119.55	9		435.8	4	30.5	65.1	3.8	64.7	167.8	172.8	55.5		1.00063e+07	56520.4	355835	291239	72569.7	627342	2.28955e+06	2.89232e+06	894946		1.00063e+07	91408.1	699685	1.49413e+06		88144.4
FALSE		High	Unambiguous	MEVEIDEKELK	[-].MEVEIDEKELK.[A]	1xAcetyl [N-Term]	1xAcetyl [N-Term]	6.17674e-05	5.33751e-05	1.48	1	1	3	731360120	731360120 [1-11]	731360120 1xAcetyl [N-Term]	731360120 1xAcetyl [N-Term]	PREDICTED: TIP41-like protein [Beta vulgaris subsp. vulgaris]	731360120	1	1404.69	11	475.7			52.2		12	32.9	214.6	120.2	92.4	1.863e+06			211186		78544.2	110342	1.01521e+06	697397	516298	3.7861e+06			415259			95401.1
FALSE		High	Unambiguous	MEVFYILVFGALAAVVAALELTKTSKDR	[-].MEVFYILVFGALAAVVAALELTKTSKDR.[I]			4.47322e-06	5.33751e-05	2.055	1	1	1	731331857	731331857 [1-28]			PREDICTED: molybdate-anion transporter [Beta vulgaris subsp. vulgaris]	731331857	2	3055.69	28
FALSE		High	Unambiguous	MGESNTPTSDQKDLNPDDNPENKTADTSIEAITR	[-].MGESNTPTSDQKDLNPDDNPENKTADTSIEAITR.[R]	1xMet-loss+Acetyl [N-Term]	1xMet-loss+Acetyl [N-Term]	5.31036e-06	5.33751e-05	2.018	1	1	1	731321090	731321090 [1-34]	731321090 1xMet-loss+Acetyl [N-Term]	731321090 1xMet-loss+Acetyl [N-Term]	PREDICTED: glycylpeptide N-tetradecanoyltransferase 1 [Beta vulgaris subsp. vulgaris]	731321090	2	3615.65	34		313.8		164			60.9	252.5	35.7	173		1.21116e+06		321910			99217.6	579337	100582	468621		1.21116e+06		632977
FALSE		High	Unambiguous	MGEIEVLTGSAGEIR	[K].MGEIEVLTGSAGEIR.[T]			1.57283e-05	5.33751e-05	1.783	1	1	6	731321380	731321380 [306-320]			PREDICTED: peroxidase 5 [Beta vulgaris subsp. vulgaris]	731321380	0	1561.79	15	308.7	151.5	20.9	24.7	131.6	75.9	17.2	108.3	66.2	94.8	5.92622e+06	5.91117e+06	505271	489640	1.00118e+06	2.43943e+06	283643	2.5123e+06	1.88373e+06	2.59739e+06	1.20436e+07	5.91117e+06	817154	962787	5.13632e+06		2.96297e+06
FALSE		High	Unambiguous	MGEEATKVIVPESVLKK	[-].MGEEATKVIVPESVLKK.[Q]	1xMet-loss+Acetyl [N-Term]	1xMet-loss+Acetyl [N-Term]	7.31576e-05	5.33751e-05	1.441	1	1	16	731362570	731362570 [1-17]	731362570 1xMet-loss+Acetyl [N-Term]	731362570 1xMet-loss+Acetyl [N-Term]	PREDICTED: 60S ribosomal protein L7-2 [Beta vulgaris subsp. vulgaris]	731362570	2	1769.01	17	157.7	204.7	13.8	37.9	92	72.4	106	99.6	111.3	104.6	4.99334e+06	1.31691e+07	550454	1.24022e+06	1.15346e+06	3.83578e+06	2.87708e+06	3.80838e+06	5.21783e+06	4.72188e+06	1.01478e+07	1.31691e+07	890226	2.43867e+06	5.91756e+06		4.659e+06
FALSE		High	Unambiguous	MGEEATKVIVPESVLKK	[-].MGEEATKVIVPESVLKK.[Q]	1xMet-loss [N-Term]	1xMet-loss [N-Term]	1.4084e-05	5.33751e-05	1.807	1	1	31	731362570	731362570 [1-17]	731362570 1xMet-loss [N-Term]	731362570 1xMet-loss [N-Term]	PREDICTED: 60S ribosomal protein L7-2 [Beta vulgaris subsp. vulgaris]	731362570	2	1726.99	17	353.2	148.3	36	106.6	76.6	12.3	71.8	86.1	63.8	45.3	5.78507e+07	4.93621e+07	7.40352e+06	1.8054e+07	4973236	3.36325e+06	1.00884e+07	1.70439e+07	1.54739e+07	1.05895e+07	1.17568e+08	4.93621e+07	1.19734e+07	3.54999e+07	2.5514e+07		4.08505e+06
FALSE		High	Unambiguous	MGEEATKVIVPESVLK	[-].MGEEATKVIVPESVLK.[K]	1xMet-loss+Acetyl [N-Term]	1xMet-loss+Acetyl [N-Term]	6.41887e-07	5.33751e-05	2.473	1	1	7	731362570	731362570 [1-16]	731362570 1xMet-loss+Acetyl [N-Term]	731362570 1xMet-loss+Acetyl [N-Term]	PREDICTED: 60S ribosomal protein L7-2 [Beta vulgaris subsp. vulgaris]	731362570	1	1640.91	16	393.1	423.4		14	12.5		9.6	81.5	26.7	39.2	3.71163e+06	8.1244e+06		136640	46919.2		77415.7	929772	373902	527424	7.543e+06	8.1244e+06		268678	240708
FALSE		High	Unambiguous	MGEEATKVIVPESVLK	[-].MGEEATKVIVPESVLK.[K]	1xMet-loss [N-Term]	1xMet-loss [N-Term]	2.49264e-06	5.33751e-05	2.181	1	1	20	731362570	731362570 [1-16]	731362570 1xMet-loss [N-Term]	731362570 1xMet-loss [N-Term]	PREDICTED: 60S ribosomal protein L7-2 [Beta vulgaris subsp. vulgaris]	731362570	1	1598.9	16	193.2	245.3	0.4	37.5	36.5	47.7	96.6	122	121.5	99.3	7.71543e+06	1.99063e+07	21800.4	1.54764e+06	577027	3.19079e+06	3.30807e+06	5.88781e+06	7.19198e+06	5.65468e+06	1.56798e+07	1.99063e+07	35256.9	3.04315e+06	2.9603e+06		3.87558e+06
FALSE		High	Unambiguous	MGDSSVEVTDENREAAQEAK	[K].MGDSSVEVTDENREAAQEAK.[I]			1.10407e-08	5.33751e-05	3.347	1	1	7	731330577	731330577 [103-122]			PREDICTED: FAM10 family protein At4g22670 [Beta vulgaris subsp. vulgaris]	731330577	1	2165.96	20	200	271.9		22		4.4	99.5	225.7	122.1	54.5	2.83886e+06	7.84515e+06		322610		103835	1.21076e+06	3.87048e+06	2.56747e+06	1104306	5.76931e+06	7.84515e+06		634354			126120
FALSE		High	Unambiguous	MGDSQYSFSLTTFSPSGKLVQIEHALTAVGSGQTSLGIK	[-].MGDSQYSFSLTTFSPSGKLVQIEHALTAVGSGQTSLGIK.[A]	1xMet-loss+Acetyl [N-Term]	1xMet-loss+Acetyl [N-Term]	3.36409e-07	5.33751e-05	2.612	1	1	2	731356285	731356285 [1-39]	731356285 1xMet-loss+Acetyl [N-Term]	731356285 1xMet-loss+Acetyl [N-Term]	PREDICTED: proteasome subunit alpha type-2-B [Beta vulgaris subsp. vulgaris]	731356285	1	3954.01	39	1000										3.31123e+06										6.72929e+06
FALSE		High	Unambiguous	MGETRENDAYEEELLDYDEEEEKVPDSAVTK	[-].MGETRENDAYEEELLDYDEEEEKVPDSAVTK.[T]	1xMet-loss+Acetyl [N-Term]	1xMet-loss+Acetyl [N-Term]	5.57329e-12	5.33751e-05	4.98	1	1	12	731316567	731316567 [1-31]	731316567 1xMet-loss+Acetyl [N-Term]	731316567 1xMet-loss+Acetyl [N-Term]	PREDICTED: DEAD-box ATP-dependent RNA helicase 56 [Beta vulgaris subsp. vulgaris]	731316567	2	3544.56	31	202.4	248.6	7.6	170.8	38.9	69.4	49.4	78.1	68.2	66.6	5285008	1.31909e+07	250396	4.60758e+06	401916	3.03326e+06	1.10563e+06	2.46202e+06	2.63626e+06	2.48075e+06	1.07405e+07	1.31909e+07	404955	9.05996e+06	2.06194e+06		3.68424e+06
FALSE		High	Unambiguous	MGDSQYSFSLTTFSPSGK	[-].MGDSQYSFSLTTFSPSGK.[L]	1xMet-loss+Acetyl [N-Term]	1xMet-loss+Acetyl [N-Term]	2.64175e-07	5.33751e-05	2.664	1	1	27	731356285	731356285 [1-18]	731356285 1xMet-loss+Acetyl [N-Term]	731356285 1xMet-loss+Acetyl [N-Term]	PREDICTED: proteasome subunit alpha type-2-B [Beta vulgaris subsp. vulgaris]	731356285	0	1850.84	18	129.2	45.4	10.9	88.9	17.1	57	35.6	319.8	169.8	126.3	5.03127e+06	3.58905e+06	534526	3.57906e+06	263837	3.71007e+06	1.18907e+06	1.50395e+07	9.79678e+06	7.01374e+06	1.02249e+07	3.58905e+06	864466	7.03757e+06	1.35355e+06		4.50631e+06
FALSE		High	Unambiguous	MGDQVIGCHAVDQWNEHFENGK	[-].MGDQVIGCHAVDQWNEHFENGK.[N]	1xCarbamidomethyl [C8]; 1xMet-loss+Acetyl [N-Term]	1xCarbamidomethyl [C8]; 1xMet-loss+Acetyl [N-Term]	7.67148e-08	5.33751e-05	2.93	1	1	29	731312103	731312103 [1-22]	731312103 1xMet-loss+Acetyl [N-Term]	731312103 1xMet-loss+Acetyl [N-Term]	PREDICTED: thioredoxin H-type 1 [Beta vulgaris subsp. vulgaris]	731312103	0	2482.08	22	1.8	105.6	164.6	168.5	193.5	58.1	85	95	72.5	55.4	163667	1.93608e+07	1.86579e+07	15714850	6.9144e+06	8.77295e+06	6.57748e+06	1.03493e+07	9.68836e+06	7.13224e+06	332614	1.93608e+07	3.01747e+07	3.09004e+07	3.54727e+07		1.06558e+07
FALSE		High	Unambiguous	MGDIKPLTGSQGQIRK	[K].MGDIKPLTGSQGQIRK.[N]			1.87565e-08	5.33751e-05	3.233	1	1	9	731316487	731316487 [302-317]			PREDICTED: peroxidase 4 [Beta vulgaris subsp. vulgaris]	731316487	1	1728.94	16	193.8	76.3	154.9	258.6	87	17.5	24.9	80.2	83.9	23	1.14979e+07	9.20179e+06	1.15475e+07	1.58586e+07	2.04511e+06	1.73883e+06	1.26685e+06	5.74924e+06	7.37151e+06	1.94293e+06	2.33668e+07	9.20179e+06	1.86754e+07	3.11831e+07	1.0492e+07		2.11201e+06
FALSE		High	Unambiguous	MGDIKPLTGSQGQIR	[K].MGDIKPLTGSQGQIR.[K]			3.23272e-06	5.33751e-05	2.125	1	1	30	731316487	731316487 [302-316]			PREDICTED: peroxidase 4 [Beta vulgaris subsp. vulgaris]	731316487	0	1600.85	15	124.5	106.4	54	71	117.4	86.3	172.8	37.2	74.8	155.8	1.80583e+07	3.13671e+07	9.83563e+06	1.06373e+07	6.74315e+06	2.09364e+07	2.14884e+07	6.51891e+06	16073888	3.22354e+07	3.66992e+07	3.13671e+07	1.59068e+07	2.09162e+07	3.45942e+07		2.54297e+07
FALSE		High	Unambiguous	MGDANVVEAK	[-].MGDANVVEAK.[D]	1xMet-loss+Acetyl [N-Term]	1xMet-loss+Acetyl [N-Term]	0.000106379	5.33751e-05	1.352	1	1	1	731328137	731328137 [1-10]	731328137 1xMet-loss+Acetyl [N-Term]	731328137 1xMet-loss+Acetyl [N-Term]	PREDICTED: uncharacterized protein LOC104890962 [Beta vulgaris subsp. vulgaris]	731328137	0	944.468	10						296.7	310.1	72	149.1	172.1						965148	516918	169123	429338	477263							1.17228e+06
FALSE		High	Unambiguous	MGDALLFWSLKPDASLDPSSLHAGCPVIR	[K].MGDALLFWSLKPDASLDPSSLHAGCPVIR.[G]	1xCarbamidomethyl [C25]	1xCarbamidomethyl [C25]	3.26552e-05	5.33751e-05	1.623	1	1	2	731343729	731343729 [246-274]			PREDICTED: probable prolyl 4-hydroxylase 10 [Beta vulgaris subsp. vulgaris]	731343729	0	3153.59	29		362.5		141.7			114		167.3	214.6		2240977		445500			297420		753937	931145		2240977		875995
FALSE		High	Unambiguous	MGDAIDLTGDGGVLK	[-].MGDAIDLTGDGGVLK.[T]	1xMet-loss+Acetyl [N-Term]	1xMet-loss+Acetyl [N-Term]	1.83862e-05	5.33751e-05	1.749	1	1	14	731315332	731315332 [1-15]	731315332 1xMet-loss+Acetyl [N-Term]	731315332 1xMet-loss+Acetyl [N-Term]	PREDICTED: peptidyl-prolyl cis-trans isomerase FKBP20-1 [Beta vulgaris subsp. vulgaris]	731315332	0	1372.7	15	17.7	296.4	26.8	31.6	62.6	67.2	92.4	143.2	167.4	94.6	242163	8.23665e+06	460338	447132	339231	1.5375e+06	1.08309e+06	2.36559e+06	3.3925e+06	1.84586e+06	492138	8.23665e+06	744486	879202	1.74035e+06		1.86748e+06
FALSE		High	Unambiguous	MGAQNLFDAEDGNLEVGMEYR	[-].MGAQNLFDAEDGNLEVGMEYR.[T]	1xOxidation [M18]; 1xMet-loss [N-Term]	1xOxidation [M18]; 1xMet-loss [N-Term]	1.1931e-05	5.33751e-05	1.843	1	1	1	731332872	731332872 [1-21]	731332872 1xMet-loss [N-Term]	731332872 1xMet-loss [N-Term]	PREDICTED: V-type proton ATPase subunit B 2 [Beta vulgaris subsp. vulgaris]	731332872	0	2243.99	21					26.5					973.5					15944.6					2.10591e+06					81799.9
FALSE		High	Unambiguous	MGAQNLFDAEDGNLEVGMEYR	[-].MGAQNLFDAEDGNLEVGMEYR.[T]	1xMet-loss [N-Term]	1xMet-loss [N-Term]	1.8583e-08	5.33751e-05	3.235	1	1	56	731332872	731332872 [1-21]	731332872 1xMet-loss [N-Term]	731332872 1xMet-loss [N-Term]	PREDICTED: V-type proton ATPase subunit B 2 [Beta vulgaris subsp. vulgaris]	731332872	0	2227.99	21	277.4	227.3	11.9	78.6	31.3	38.1	21.5	168	88.9	56.9	40818844	6.79705e+07	2.19951e+06	1.19458e+07	1.82195e+06	9.39051e+06	2.71824e+06	2.98615e+07	1.93815e+07	1.1945e+07	8.29546e+07	6.79705e+07	3.55717e+06	2.34891e+07	9.34709e+06		1.14059e+07
FALSE		High	Unambiguous	MGDQVIGCHAVDQWNEHFENGKNCGK	[-].MGDQVIGCHAVDQWNEHFENGKNCGK.[L]	2xCarbamidomethyl [C8; C24]; 1xMet-loss+Acetyl [N-Term]	2xCarbamidomethyl [C8; C24]; 1xMet-loss+Acetyl [N-Term]	2.30859e-07	5.33751e-05	2.693	1	1	25	731312103	731312103 [1-26]	731312103 1xMet-loss+Acetyl [N-Term]	731312103 1xMet-loss+Acetyl [N-Term]	PREDICTED: thioredoxin H-type 1 [Beta vulgaris subsp. vulgaris]	731312103	1	2941.27	26		75.2	237.4	171	181.9	58	96	84.8	51	44.8		1.19372e+07	23298856	1.37999e+07	5.62654e+06	7.57607e+06	6.42945e+06	8.00031e+06	5.89663e+06	4.98571e+06		1.19372e+07	3.76803e+07	2.7135e+07	2.88657e+07		9.20202e+06
FALSE		High	Unambiguous	MGAIIASGILDAGGR	[K].MGAIIASGILDAGGR.[N]			4.29034e-06	5.33751e-05	2.064	1	1	26	731325288	731325288 [740-754]			PREDICTED: 26S proteasome non-ATPase regulatory subunit 1 homolog A [Beta vulgaris subsp. vulgaris]	731325288	0	1401.75	15	75.3	86.2	133.3	134.1	76.5	112.2	76.1	117.5	98	90.7	3.77173e+06	8.77959e+06	8.39047e+06	6.94204e+06	1.51836e+06	9.40779e+06	3.27017e+06	7.11239e+06	7.27105e+06	6.47768e+06	7.66514e+06	8.77959e+06	1.35696e+07	1.36502e+07	7.78957e+06		1.14269e+07
FALSE		High	Unambiguous	MGFFLHSPFPSSEIYR	[R].MGFFLHSPFPSSEIYR.[T]			6.82719e-05	5.33751e-05	1.457	1	1	2	731320929	731320929 [227-242]			PREDICTED: probable alpha,alpha-trehalose-phosphate synthase [UDP-forming] 7 [Beta vulgaris subsp. vulgaris]	731320929	0	1914.92	16					641.6	150.8	26.5			181.1					1.46492e+06	1.45479e+06	131086			1.48892e+06					7.51545e+06		1.76702e+06
FALSE		High	Unambiguous	MGFIMEFAENLVLR	[-].MGFIMEFAENLVLR.[L]	1xMet-loss [N-Term]	1xMet-loss [N-Term]	3.68873e-05	5.33751e-05	1.596	1	1	8	731319912	731319912 [1-14]	731319912 1xMet-loss [N-Term]	731319912 1xMet-loss [N-Term]	PREDICTED: uncharacterized protein LOC104887566 [Beta vulgaris subsp. vulgaris]	731319912	0	1538.8	14	37.3	31.3	286.9	143.9	222.6	85.5		71	68.5	53.1	477141	814056	4.61428e+06	1.90349e+06	1.12847e+06	1.83068e+06		1.09809e+06	1.29833e+06	970313	969676	814056	7.46249e+06	3.74286e+06	5.78937e+06		2.22358e+06
FALSE		High	Unambiguous	MGIKIHGIPHSGATLR	[-].MGIKIHGIPHSGATLR.[V]	1xMet-loss [N-Term]	1xMet-loss [N-Term]	1.07022e-06	5.33751e-05	2.363	3	3	57	731375679; 731345745; 731355566	731375679 [1-16]; 731345745 [1-16]; 731355566 [1-16]	731375679 1xMet-loss [N-Term]; 731345745 1xMet-loss [N-Term]; 731355566 1xMet-loss [N-Term]	731375679 1xMet-loss [N-Term]; 731345745 1xMet-loss [N-Term]; 731355566 1xMet-loss [N-Term]	PREDICTED: glutathione S-transferase [Beta vulgaris subsp. vulgaris] PREDICTED: glutathione S-transferase [Beta vulgaris subsp. vulgaris] PREDICTED: glutathione S-transferase [Beta vulgaris subsp. vulgaris]	731375679; 731345745; 731355566	1	1556.9	16	163.1	42	25.6	95	356.8	6.8	62	77.3	97.3	74.1	9.76472e+07	5.10693e+07	1.923e+07	5.87851e+07	8.46306e+07	6.82188e+06	3.18444e+07	5.58896e+07	8.62812e+07	6.33053e+07	1.98445e+08	5.10693e+07	3.10998e+07	1.1559e+08	4.34178e+08		8.28597e+06
FALSE		High	Unambiguous	MGLHPSEIIIGYNKGISK	[R].MGLHPSEIIIGYNKGISK.[A]			0.00011356	5.33751e-05	1.336	1	1	9	731322735	731322735 [120-137]			PREDICTED: T-complex protein 1 subunit theta [Beta vulgaris subsp. vulgaris]	731322735	1	1957.06	18	363	97.5		145.3	258.7	6	12.1	47.2	50.1	20.1	8.9287e+06	4.87624e+06		3.69334e+06	2.52053e+06	245480	256052	1.40205e+06	1.82746e+06	706442	1.81455e+07	4.87624e+06		7.26228e+06	1.2931e+07		298164
FALSE		High	Unambiguous	MGLHPSEIIIGYNK	[R].MGLHPSEIIIGYNK.[G]			1.19861e-05	5.33751e-05	1.842	1	1	32	731322735	731322735 [120-133]			PREDICTED: T-complex protein 1 subunit theta [Beta vulgaris subsp. vulgaris]	731322735	0	1571.83	14	304.9	57.2	182.8	24.5	180.2	41	45.5	48.9	63.4	51.7	2.78072e+07	1.06093e+07	2.0949e+07	2.307e+06	6.50965e+06	6.25199e+06	3.55781e+06	5.38841e+06	8.56332e+06	6.71919e+06	5.65115e+07	1.06093e+07	3.388e+07	4.53629e+06	3.33963e+07		7.59376e+06
FALSE		High	Unambiguous	MGLGKPDTEGEPPEFGAAADGDADRNMILGKR	[R].MGLGKPDTEGEPPEFGAAADGDADRNMILGKR.[F]			7.69414e-10	5.33751e-05	3.92	1	1	27	731341465	731341465 [281-312]			PREDICTED: phosphoglucomutase, cytoplasmic [Beta vulgaris subsp. vulgaris]	731341465	2	3315.57	32	235.2	86	53.1	166.1	259.2		60.3	74.3	37	28.9	29586976	2.1991e+07	8.39306e+06	2.1593e+07	1.29183e+07		6.50552e+06	1.12917e+07	6.89178e+06	5.19505e+06	6.01285e+07	2.1991e+07	1.35738e+07	4.24586e+07	6.62745e+07
FALSE		High	Unambiguous	MGLGKPDTEGEPPEFGAAADGDADRNMILGK	[R].MGLGKPDTEGEPPEFGAAADGDADRNMILGK.[R]			1.07792e-05	5.33751e-05	1.865	1	1	10	731341465	731341465 [281-311]			PREDICTED: phosphoglucomutase, cytoplasmic [Beta vulgaris subsp. vulgaris]	731341465	1	3159.47	31	109.6	150.5		199.8	159.5	135.9	73.2	46.1	71.5	53.9	2885544	8.04977e+06		5.43735e+06	1.66314e+06	5.98775e+06	1.6531e+06	1.46698e+06	2.78833e+06	2.02329e+06	5.86418e+06	8.04977e+06		1.06916e+07	8.53237e+06		7.27282e+06
FALSE		High	Unambiguous	MGLAFDEQDLQYYTWLFKEDIKR	[R].MGLAFDEQDLQYYTWLFKEDIKR.[N]			4.07691e-06	5.33751e-05	2.075	1	1	1	731317318	731317318 [279-301]			PREDICTED: probable phosphoribosylformylglycinamidine synthase, chloroplastic/mitochondrial [Beta vulgaris subsp. vulgaris]	731317318	2	2909.42	23	917.8	31.8	50.4								2.74466e+06	193430	189256								5.57786e+06	193430	306076
FALSE		High	Unambiguous	MGKSYPTVSEDYQKSIEK	[-].MGKSYPTVSEDYQKSIEK.[A]	1xMet-loss [N-Term]	1xMet-loss [N-Term]	2.33575e-06	5.33751e-05	2.195	1	1	5	731355965	731355965 [1-18]	731355965 1xMet-loss [N-Term]	731355965 1xMet-loss [N-Term]	PREDICTED: L-ascorbate peroxidase, cytosolic [Beta vulgaris subsp. vulgaris]	731355965	2	1958.97	18	484.2	191		153.9	34.3		24.3	49.6	41.1	21.6	9838061	7.8892e+06		3.23216e+06	276230		423068	1.21642e+06	1.23826e+06	626319	1.99935e+07	7.8892e+06		6.35544e+06	1.41713e+06
FALSE		High	Unambiguous	MGKSYPTVSEDYQK	[-].MGKSYPTVSEDYQK.[S]	1xMet-loss [N-Term]	1xMet-loss [N-Term]	2.19891e-06	5.33751e-05	2.208	1	1	47	731355965	731355965 [1-14]	731355965 1xMet-loss [N-Term]	731355965 1xMet-loss [N-Term]	PREDICTED: L-ascorbate peroxidase, cytosolic [Beta vulgaris subsp. vulgaris]	731355965	1	1501.72	14	111.5	83.5	73.1	105.9	122.2	96.3	130.3	64.8	102.2	110	3.31653e+07	5.04554e+07	2.73215e+07	3.25567e+07	1.44014e+07	4.79266e+07	3.32427e+07	2.32933e+07	4.50236e+07	4.6668e+07	6.74006e+07	5.04554e+07	4.4186e+07	6.40168e+07	7.38832e+07		5.82124e+07
FALSE		High	Unambiguous	MGFGKKEYQFLEEIDISTR	[-].MGFGKKEYQFLEEIDISTR.[N]	1xMet-loss [N-Term]	1xMet-loss [N-Term]	0.000107694	5.33751e-05	1.349	1	1	2	731348057	731348057 [1-19]	731348057 1xMet-loss [N-Term]	731348057 1xMet-loss [N-Term]	PREDICTED: aldehyde dehydrogenase family 7 member B4 [Beta vulgaris subsp. vulgaris]	731348057	2	2160.1	19	839.1	42.8	5.4		10.5	16.5		14	26.7	44.9	7.1264e+06	738999	57900.5		35483.6	234911		143266	335594	543955	1.44827e+07	738999	93640.1		182040		285327
FALSE		High	Unambiguous	MGKCYPTVSEDYQK	[-].MGKCYPTVSEDYQK.[S]	1xCarbamidomethyl [C4]; 1xMet-loss [N-Term]	1xCarbamidomethyl [C4]; 1xMet-loss [N-Term]	1.12884e-05	5.33751e-05	1.855	1	1	28	731359393	731359393 [1-14]	731359393 1xMet-loss [N-Term]	731359393 1xMet-loss [N-Term]	PREDICTED: L-ascorbate peroxidase, cytosolic [Beta vulgaris subsp. vulgaris]	731359393	1	1574.72	14	34.5	101.4	61.5	104.4	89.4	118.3	155.6	78.5	128.3	128	5.73356e+06	3.43018e+07	1.28565e+07	1.79598e+07	5.89121e+06	3.29469e+07	2.22038e+07	1.57841e+07	3.16381e+07	3.0387e+07	1.16521e+07	3.43018e+07	2.07923e+07	3.53147e+07	3.02235e+07		4.00179e+07
FALSE		High	Unambiguous	MGHSNIWNSHPKSYGPGSR	[-].MGHSNIWNSHPKSYGPGSR.[A]	1xMet-loss [N-Term]	1xMet-loss [N-Term]	1.44119e-05	5.33751e-05	1.802	1	1	4	731340623	731340623 [1-19]	731340623 1xMet-loss [N-Term]	731340623 1xMet-loss [N-Term]	PREDICTED: 40S ribosomal protein S29 [Beta vulgaris subsp. vulgaris]	731340623	1	1980.94	19	81.6			33.2	105	4.2	157	278.2	255.9	84.9	1.50591e+06			633117	768329	128734	2.48679e+06	6.20663e+06	7.00163e+06	2.2354e+06	3.0604e+06			1.24491e+06	3.94173e+06		156362
FALSE		High	Unambiguous	MGHAGAIVSGGKGTAQDKITTLR	[R].MGHAGAIVSGGKGTAQDKITTLR.[G]	1xPhospho [H3]	1xPhospho [H3]	7.86903e-05	5.33751e-05	1.424	1	1	1	731354582	731354582 [292-314]	731354582 1xPhospho [H294]	731354582 1xPhospho [H294]	PREDICTED: succinate--CoA ligase [ADP-forming] subunit alpha-1, mitochondrial [Beta vulgaris subsp. vulgaris]	731354582	2	2349.17	23		1000										3.20431e+06										3.20431e+06
FALSE		High	Unambiguous	MGHAGAIVSGGKGTAQDKITTLR	[R].MGHAGAIVSGGKGTAQDKITTLR.[G]			5.0327e-09	5.33751e-05	3.516	1	1	17	731354582	731354582 [292-314]			PREDICTED: succinate--CoA ligase [ADP-forming] subunit alpha-1, mitochondrial [Beta vulgaris subsp. vulgaris]	731354582	2	2269.21	23	380	47.5	17.2	251.9	131.8	4.2	32	29.1	47.8	58.4	4.50896e+07	1.14645e+07	2.56795e+06	3.08973e+07	6.19434e+06	829564	3.26077e+06	4.16689e+06	8.40426e+06	9.88126e+06	9.16339e+07	1.14645e+07	4.15304e+06	6.07538e+07	3.17786e+07		1.0076e+06
FALSE		High	Unambiguous	MGGPSLFSQR	[R].MGGPSLFSQR.[R]			2.69895e-05	5.33751e-05	1.665	1	1	2	733214615	733214615 [79-88]			two-on-two hemoglobin-3 [Beta vulgaris subsp. vulgaris]	733214615	0	1079.53	10	292	11			19.3	159.1	171.9	83.6	263		1.74115e+06	133629			45536.1	1587238	878872	602240	2.32339e+06		3.53846e+06	133629			233612		1.92789e+06
FALSE		High	Unambiguous	MGGMHALMHAQGPHPLNK	[K].MGGMHALMHAQGPHPLNK.[A]			9.82821e-06	5.33751e-05	1.885	1	1	6	731348011	731348011 [374-391]			PREDICTED: oligouridylate-binding protein 1B [Beta vulgaris subsp. vulgaris]	731348011	0	1926.92	18	439.9	119.5	5.9	199.5	14	42.7	94.9	68.1	15.5		9.11709e+06	5.03375e+06	152620	4.27261e+06	115122	1.48037e+06	1.68766e+06	1.70555e+06	477416		1.85283e+07	5.03375e+06	246827	8.40131e+06	590606		1.79808e+06
FALSE		High	Unambiguous	MGGEGKVFSLSEVAEHNSSKDCWLVIGGK	[-].MGGEGKVFSLSEVAEHNSSKDCWLVIGGK.[V]	1xCarbamidomethyl [C22]; 1xMet-loss [N-Term]	1xCarbamidomethyl [C22]; 1xMet-loss [N-Term]	5.88625e-05	5.33751e-05	1.491	1	1	2	731347475	731347475 [1-29]	731347475 1xMet-loss [N-Term]	731347475 1xMet-loss [N-Term]	PREDICTED: cytochrome b5 [Beta vulgaris subsp. vulgaris]	731347475	2	2990.47	29	14.2	8.5	290.6	494.4	136.8					55.5	157511	190832	4040268	5.65351e+06	599750					875765	320104	190832	6.53416e+06	1.11166e+07	3.07688e+06
FALSE		High	Unambiguous	MGFRFHQYQVVGR	[-].MGFRFHQYQVVGR.[A]	1xMet-loss [N-Term]	1xMet-loss [N-Term]	1.82183e-05	5.33751e-05	1.751	1	1	45	731372514	731372514 [1-13]	731372514 1xMet-loss [N-Term]	731372514 1xMet-loss [N-Term]	PREDICTED: 60S ribosomal protein L18a [Beta vulgaris subsp. vulgaris]	731372514	1	1493.78	13	178.1	80.2	14	150.4	119.1	4.7	41.2	217.6	99	95.6	8.82565e+07	8.0728e+07	8.72936e+06	7.69929e+07	2.33695e+07	3.86927e+06	1.75202e+07	1.30254e+08	7.26684e+07	6.75788e+07	1.7936e+08	8.0728e+07	1.41176e+07	1.51392e+08	1.19892e+08		4.69968e+06
FALSE		High	Unambiguous	MGFNLQPYGMK	[-].MGFNLQPYGMK.[S]	1xMet-loss [N-Term]	1xMet-loss [N-Term]	9.3185e-05	5.33751e-05	1.384	1	1	28	731322735	731322735 [1-11]	731322735 1xMet-loss [N-Term]	731322735 1xMet-loss [N-Term]	PREDICTED: T-complex protein 1 subunit theta [Beta vulgaris subsp. vulgaris]	731322735	0	1154.57	11	193.3	82.4	126.3	95.3	132	36.7	77.7	111	81.8	63.5	1.32546e+07	1.14818e+07	1.08791e+07	6.75354e+06	3.58392e+06	4.20528e+06	4.56582e+06	9193454	8.31098e+06	6.21416e+06	2.69368e+07	1.14818e+07	1.75944e+07	1.32796e+07	1.83865e+07		5.10781e+06
FALSE		High	Unambiguous	MGHVVTVYER	[K].MGHVVTVYER.[S]			0.000107254	5.33751e-05	1.35	1	3	17	731321657	731321657 [1863-1872]			PREDICTED: glutamate synthase 1 [NADH], chloroplastic isoform X1 [Beta vulgaris subsp. vulgaris]	731321663; 731321657; 731321661	0	1190.6	10	141.4	119.1	146.4	157.9	60.6	50.1	57.8	96.7	97.5	72.5	2.24039e+07	3.83369e+07	2.91593e+07	2.58543e+07	3.80209e+06	1.32885e+07	7.85858e+06	1.85138e+07	2.28825e+07	1.63935e+07	4.55305e+07	3.83369e+07	4.71581e+07	5.08377e+07	1.95057e+07		1.61404e+07
FALSE		High	Unambiguous	MEVELIHPVACEEGMR	[K].MEVELIHPVACEEGMR.[F]	1xCarbamidomethyl [C11]	1xCarbamidomethyl [C11]	3.94614e-05	5.33751e-05	1.581	1	1	4	1108926884	1108926884 [505-520]			PREDICTED: elongation factor Tu, chloroplastic [Beta vulgaris subsp. vulgaris]	1108926884	0	1899.88	16	29.7	103.1	255.2	106.9	258.8	29.2	24.4	79.9	69.6	43.2	381814	2.69108e+06	4.11746e+06	1.41906e+06	1.31599e+06	626782	268112	1.23922e+06	1.32308e+06	791076	775947	2.69108e+06	6.659e+06	2.79032e+06	6.75137e+06		761300
FALSE		High	Unambiguous	MGAFTLGVNR	[R].MGAFTLGVNR.[V]			4.45331e-05	5.33751e-05	1.554	1	1	35	731322716	731322716 [390-399]			PREDICTED: glutamate dehydrogenase B [Beta vulgaris subsp. vulgaris]	731322716	0	1065.55	10	110.5	52.6	41.1	24.8	126	79.8	132.8	160.2	130.8	141.5	2.47332e+07	2.39061e+07	1.15526e+07	5.72925e+06	1.11724e+07	2.98715e+07	2.5489e+07	4.33064e+07	4.3376e+07	4.51632e+07	5.02643e+07	2.39061e+07	1.86836e+07	1.12655e+07	5.73172e+07		3.62825e+07
FALSE		High	Unambiguous	MFYGPGGPYALFAGKDASR	[R].MFYGPGGPYALFAGKDASR.[A]			3.01357e-08	5.33751e-05	3.131	1	1	11	731363620	731363620 [104-122]			PREDICTED: membrane steroid-binding protein 2 [Beta vulgaris subsp. vulgaris]	731363620	1	2004.96	19	321	102.1	25.7	194.6	174.8	16	24.1	29.2		112.5	7880525	5093670	793359	4.93772e+06	1.69968e+06	657177	508429	866802		3.94043e+06	1.60153e+07	5093670	1.28307e+06	9.70911e+06	8.71981e+06		798218
FALSE		High	Unambiguous	MFLFDWFYGILASLGLWQKEAK	[-].MFLFDWFYGILASLGLWQKEAK.[I]			2.87852e-06	5.33751e-05	2.15	2	2	1	731322034; 731336629	731322034 [1-22]; 731336629 [1-22]			PREDICTED: GTP-binding protein SAR1A [Beta vulgaris subsp. vulgaris] PREDICTED: GTP-binding protein SAR1A [Beta vulgaris subsp. vulgaris]	731322034; 731336629	1	2663.37	22
FALSE		High	Unambiguous	MFKAVEEHLIANPQVYA	[K].MFKAVEEHLIANPQVYA.[-]			2.57884e-05	5.33751e-05	1.675	2	2	58	731351891; 731346713	731351891 [145-161]; 731346713 [145-161]			PREDICTED: major allergen Pru ar 1 [Beta vulgaris subsp. vulgaris] PREDICTED: major allergen Pru ar 1 [Beta vulgaris subsp. vulgaris]	731351891; 731346713	1	1960	17	331.8	67	11.9	129.1	124.6	1.7	70.1	148.3	68.7	46.8	9.04836e+07	3.71387e+07	4.06734e+06	3.63814e+07	1.34641e+07	755673	1.63968e+07	4.88451e+07	2.77613e+07	1.82082e+07	1.83886e+08	3.71387e+07	6.57794e+06	7.15374e+07	6.90745e+07		917853
FALSE		High	Unambiguous	MFHDKESMRPLLDFLR	[-K].MFHDKESMRPLLDFLR.[M]			8.75575e-06	5.33751e-05	1.91	1	2	221	1108966238	1108966238 [165-180]			PREDICTED: sucrose synthase isoform X2 [Beta vulgaris subsp. vulgaris]	1108966230; 1108966238	1	2035.03	16	148.4	83.6	17.3	180.9	165.9	28	158.3	60.4	108.1	49	1.90665e+08	2.18378e+08	2.79973e+07	2.4029e+08	8.44496e+07	6.02342e+07	1.74471e+08	9.37464e+07	2.05865e+08	8.98858e+07	3.87482e+08	2.18378e+08	4.52789e+07	4.72486e+08	4.33249e+08		7.31614e+07
FALSE		High	Unambiguous	MFGNFQKDTPEERNLR	[K].MFGNFQKDTPEERNLR.[F]			6.85684e-05	5.33751e-05	1.456	1	1	3	731362582	731362582 [467-482]			PREDICTED: transketolase, chloroplastic [Beta vulgaris subsp. vulgaris]	731362582	2	1981.95	16	812.3		1.9		66.5			6.5		112.8	3.95849e+06		11437.5		128405			38027.2		784049	8.04468e+06		18497.4		658753
FALSE		High	Unambiguous	MFGNFQKDTPEER	[K].MFGNFQKDTPEER.[N]			2.79944e-06	5.33751e-05	2.156	1	1	72	731362582	731362582 [467-479]			PREDICTED: transketolase, chloroplastic [Beta vulgaris subsp. vulgaris]	731362582	1	1598.73	13	214.7	100.3	94.2	141.2	177.4	27.9	58.6	67.1	55.2	63.3	1.25971e+08	1.19651e+08	6.94621e+07	8.56473e+07	4.12197e+07	2.74022e+07	2.94812e+07	4.75564e+07	4.80191e+07	5.29652e+07	2.56005e+08	1.19651e+08	1.12338e+08	1.6841e+08	2.11468e+08		3.32831e+07
FALSE		High	Unambiguous	MFGGNSGNESR	[K].MFGGNSGNESR.[I]			4.99964e-05	5.33751e-05	1.528	2	3	2	731337638; 731337645	731337638 [64-74]; 731337645 [64-74]			PREDICTED: mannose/glucose-specific lectin isoform X1 [Beta vulgaris subsp. vulgaris] PREDICTED: mannose/glucose-specific lectin [Beta vulgaris subsp. vulgaris]	731337638; 731337645; 731337642	0	1155.48	11	60.1					536.6	367.1	36.2			505380					7.54637e+06	2.64655e+06	367267			1.02707e+06						9.16595e+06
FALSE		High	Unambiguous	MFGFVHLYNGQEAISSGFIK	[K].MFGFVHLYNGQEAISSGFIK.[L]			2.19813e-05	5.33751e-05	1.71	1	1	4	731372890	731372890 [117-136]			PREDICTED: pyruvate dehydrogenase E1 component subunit alpha-3, chloroplastic [Beta vulgaris subsp. vulgaris]	731372890	0	2245.11	20	285.8		64.6	37.3	3.2	60.3	127.7	200.1	52.6	168.4	1.35818e+06		385785	183005	6055.17	479162	520365	1.14907e+06	370520	1.14162e+06	2.76018e+06		623914	359846	31064.6		581998
FALSE		High	Unambiguous	MFGDFQKDTPEER	[K].MFGDFQKDTPEER.[N]			5.43807e-05	5.33751e-05	1.509	1	1	21	731322609	731322609 [466-478]			PREDICTED: transketolase, chloroplastic [Beta vulgaris subsp. vulgaris]	731322609	1	1599.71	13	153.5	89.9	171	171.4	157.9	31.6	46.8	72.1	46.9	58.9	1.49516e+07	1.77982e+07	2.09329e+07	1.72538e+07	6.09206e+06	5.15511e+06	3.90705e+06	8.48813e+06	6.77044e+06	8.19076e+06	3.03856e+07	1.77982e+07	3.38538e+07	3.39265e+07	3.12539e+07		6.26148e+06
FALSE		High	Unambiguous	MFLFDWFYGILASLGLWQKEAK	[-].MFLFDWFYGILASLGLWQKEAK.[I]	1xAcetyl [N-Term]	1xAcetyl [N-Term]	5.56641e-08	5.33751e-05	2.999	2	2	7	731322034; 731336629	731322034 [1-22]; 731336629 [1-22]	731322034 1xAcetyl [N-Term]; 731336629 1xAcetyl [N-Term]	731322034 1xAcetyl [N-Term]; 731336629 1xAcetyl [N-Term]	PREDICTED: GTP-binding protein SAR1A [Beta vulgaris subsp. vulgaris] PREDICTED: GTP-binding protein SAR1A [Beta vulgaris subsp. vulgaris]	731322034; 731336629	1	2705.38	22			1000										7524485										1.2169e+07
FALSE		High	Unambiguous	MFFPYSQAAMLLVEHGTDLYKIDR	[R].MFFPYSQAAMLLVEHGTDLYKIDR.[A]			1.77389e-08	5.33751e-05	3.245	1	1	29	731363761	731363761 [497-520]			PREDICTED: peroxisomal fatty acid beta-oxidation multifunctional protein MFP2 [Beta vulgaris subsp. vulgaris]	731363761	1	2845.41	24	63.7	77.2	241	114.2	35.1	67	178.3	77.8	104.2	41.5	6.23582e+06	1.53527e+07	2.96319e+07	1.15487e+07	1.36094e+06	1.09638e+07	1.49619e+07	9.20239e+06	1.51149e+07	5.7914e+06	1.26728e+07	1.53527e+07	4.79224e+07	2.27084e+07	6.98199e+06		1.33168e+07
FALSE		High	Unambiguous	MFELLSEGLGLEKDAIGK	[K].MFELLSEGLGLEKDAIGK.[S]			4.49325e-05	5.33751e-05	1.552	1	1	5	731360520	731360520 [178-195]			PREDICTED: flavanone 3-dioxygenase [Beta vulgaris subsp. vulgaris]	731360520	1	1950.03	18			51.4	27.6	99.9		349.1	98.6		373.4			369864	163191	226625		1.71375e+06	681942		3.04937e+06			598166	320885	1.16265e+06
FALSE		High	Unambiguous	MFDASLYEKTR	[R].MFDASLYEKTR.[R]			3.92846e-05	5.33751e-05	1.582	1	1	1	731354706	731354706 [511-521]			PREDICTED: delta(24)-sterol reductase [Beta vulgaris subsp. vulgaris]	731354706	1	1360.66	11	614.6	260		25				85.8		14.6	1.8433e+06	1.58492e+06		77413.9				310861		62492.1	3.74607e+06	1.58492e+06		152220
FALSE		High	Unambiguous	MFAGAGGALGHPPPDSPTLDTSEQVYISSLALLK	[R].MFAGAGGALGHPPPDSPTLDTSEQVYISSLALLK.[M]			6.24537e-06	5.33751e-05	1.983	1	1	7	731367021	731367021 [7-40]			PREDICTED: 26S proteasome non-ATPase regulatory subunit 14 homolog [Beta vulgaris subsp. vulgaris]	731367021	0	3440.74	34	258.3	123.4		179.7	33.9			176.5	145	83.2	3.30424e+06	3.20837e+06		2.37632e+06	171743			2.72808e+06	2.74916e+06	1.51847e+06	6.71509e+06	3.20837e+06		4.6726e+06	881089
FALSE		High	Unambiguous	MEWSTIQHLDLR	[-].MEWSTIQHLDLR.[H]	1xAcetyl [N-Term]	1xAcetyl [N-Term]	4.86262e-06	5.33751e-05	2.037	1	1	14	731363294	731363294 [1-12]	731363294 1xAcetyl [N-Term]	731363294 1xAcetyl [N-Term]	PREDICTED: uncharacterized protein LOC104906319 [Beta vulgaris subsp. vulgaris]	731363294	0	1570.77	12	186.8	159	4.1	146	94.9	95.4	88.4	112.8	71.4	41.3	5.18496e+06	8.97135e+06	142049	4.18786e+06	1.04349e+06	4.42943e+06	2.10525e+06	3.78439e+06	2.93664e+06	1.63413e+06	1.05372e+07	8.97135e+06	229730	8.23466e+06	5.35336e+06		5.38006e+06
FALSE		High	Unambiguous	MEVTQRPPMAVTNAVSWR	[R].MEVTQRPPMAVTNAVSWR.[S]			9.18067e-07	5.33751e-05	2.396	1	1	1	731342494	731342494 [145-162]			PREDICTED: AP-1 complex subunit mu-2 [Beta vulgaris subsp. vulgaris]	731342494	0	2073.04	18	80.7		538.7		283.8					96.7	304211		2550854		423646					519701	618236		4.12539e+06		2.17342e+06
FALSE		High	Unambiguous	MEVTNVNEYEAIAK	[-].MEVTNVNEYEAIAK.[Q]	1xAcetyl [N-Term]	1xAcetyl [N-Term]	1.11332e-05	5.33751e-05	1.858	1	1	6	731365529	731365529 [1-14]	731365529 1xAcetyl [N-Term]	731365529 1xAcetyl [N-Term]	PREDICTED: peroxisomal (S)-2-hydroxy-acid oxidase isoform X1 [Beta vulgaris subsp. vulgaris]	731365529	0	1652.78	14		407.5	31.3	31.5	25.6	94.6	84.1	148.1	125.3	52		7.88702e+06	374726	310200	96573.6	1.50762e+06	686732	1.70354e+06	1.76747e+06	706922		7.88702e+06	606028	609951	495448		1.83119e+06
FALSE		High	Unambiguous	MEVTAMPTFLLMK	[K].MEVTAMPTFLLMK.[D]			3.94614e-05	5.33751e-05	1.581	1	1	2	731351242	731351242 [81-93]			PREDICTED: thioredoxin-like protein CXXS1 [Beta vulgaris subsp. vulgaris]	731351242	0	1511.77	13		161	69.5	113.9	49.6	85.4	43	136.3	341.3			2.94251e+06	785286	1.05836e+06	176586	1.28525e+06	331723	1.48009e+06	4546296			2.94251e+06	1.27001e+06	2.08108e+06	905931		1.56109e+06
FALSE		High	Unambiguous	MEVGFLGLGIMGK	[-].MEVGFLGLGIMGK.[A]	1xAcetyl [N-Term]	1xAcetyl [N-Term]	1.41434e-06	5.33751e-05	2.303	1	1	16	731336040	731336040 [1-13]	731336040 1xAcetyl [N-Term]	731336040 1xAcetyl [N-Term]	PREDICTED: glyoxylate/succinic semialdehyde reductase 1 [Beta vulgaris subsp. vulgaris]	731336040	0	1393.72	13	18.3	92.2	139.4	139.8	30.2	75.1	134.8	256.2	61.9	52.1	784450	8.01433e+06	7.49217e+06	6.18164e+06	511983	5.37098e+06	4.94273e+06	1.32397e+07	3.92016e+06	3.179e+06	1.59421e+06	8.01433e+06	1.21168e+07	1.21551e+07	2.62661e+06		6.52369e+06
FALSE		High	Unambiguous	MFEITYENEKGEK	[K].MFEITYENEKGEK.[A]			8.31683e-05	5.33751e-05	1.411	1	1	22	731364445	731364445 [320-332]			PREDICTED: proline--tRNA ligase, cytoplasmic [Beta vulgaris subsp. vulgaris]	731364445	1	1617.75	13	115.7	65.8	162.6	138.4	179.7	59.7	35.8	93.4	65.7	83.1	6.91152e+06	7.9931e+06	1.22076e+07	8.54684e+06	4.25318e+06	5.96786e+06	1.83173e+06	6.73922e+06	5.81236e+06	7.08145e+06	1.4046e+07	7.9931e+06	1.97429e+07	1.68058e+07	2.18199e+07		7.24866e+06
FALSE		High	Unambiguous	MGAAVGKDCALLEEVCGWVNAK	[K].MGAAVGKDCALLEEVCGWVNAK.[A]	2xCarbamidomethyl [C9; C16]	2xCarbamidomethyl [C9; C16]	4.93073e-06	5.33751e-05	2.034	1	1	7	731362839	731362839 [197-218]			PREDICTED: dihydropyrimidine dehydrogenase (NADP(+)), chloroplastic [Beta vulgaris subsp. vulgaris]	731362839	1	2378.13	22		183		239.9	113.6	138.1	75.6	120.4	75	54.4		5.66654e+06		3.77735e+06	685768	3519429	987674	2.21651e+06	1.69281e+06	1.18139e+06		5.66654e+06		7.42746e+06	3.51817e+06		4.27476e+06
FALSE		High	Unambiguous	MFLRGDSVIIVLRNPK	[K].MFLRGDSVIIVLRNPK.[-]			4.53589e-06	5.33751e-05	2.052	1	3	11	731359930	731359930 [89-104]			PREDICTED: small nuclear ribonucleoprotein Sm D2 [Beta vulgaris subsp. vulgaris]	731359930; 1108953880; 1108953856	2	1858.07	16	30.1	20	52	93.3	18.1			589.1	109.4	87.9	1.02759e+06	1.38762e+06	2.22961e+06	3.29172e+06	244604			2.42853e+07	5.53115e+06	4.27912e+06	2.08833e+06	1.38762e+06	3.60586e+06	6.47256e+06	1.25488e+06
FALSE		High	Unambiguous	MFLTRTEYDRGVNTFSPEGR	[-].MFLTRTEYDRGVNTFSPEGR.[L]	1xAcetyl [N-Term]	1xAcetyl [N-Term]	2.92902e-05	5.33751e-05	1.647	2	2	4	731361751; 731363918	731361751 [1-20]; 731363918 [1-20]	731361751 1xAcetyl [N-Term]; 731363918 1xAcetyl [N-Term]	731361751 1xAcetyl [N-Term]; 731363918 1xAcetyl [N-Term]	PREDICTED: proteasome subunit alpha type-5 [Beta vulgaris subsp. vulgaris] PREDICTED: proteasome subunit alpha type-5 [Beta vulgaris subsp. vulgaris]	731361751; 731363918	2	2418.15	20	183.3	18.8		304.2	43		75.4	213.3	85.9	76.1	3.74193e+06	781775		6.42099e+06	347848		1.31966e+06	5.26132e+06	2598290	2.21735e+06	7.60458e+06	781775		1.26257e+07	1.78455e+06
FALSE		High	Unambiguous	MFYGPGGPYALFAGK	[R].MFYGPGGPYALFAGK.[D]			1.46109e-06	5.33751e-05	2.296	1	1	34	731363620	731363620 [104-118]			PREDICTED: membrane steroid-binding protein 2 [Beta vulgaris subsp. vulgaris]	731363620	0	1575.77	15	111.3	120.1	52	106.1	173.1	85.9	98.3	91.7	85.3	76.2	2.17609e+07	4.77146e+07	1.27807e+07	2.1422e+07	1.34e+07	2.80929e+07	1.6467e+07	2.16576e+07	2.4684e+07	2.12298e+07	4.42239e+07	4.77146e+07	2.06696e+07	4.21224e+07	6.87457e+07		3.41221e+07
FALSE		High	Unambiguous	MFYEIVVAPGFSEKGLEVLR	[R].MFYEIVVAPGFSEKGLEVLR.[G]			2.73604e-05	5.33751e-05	1.662	1	1	1	1108925604	1108925604 [415-434]			PREDICTED: uncharacterized protein LOC104894138 [Beta vulgaris subsp. vulgaris]	1108925604	1	2284.2	20	643	118.9		179.1		59					1.83617e+06	689785		528715		282097					3.73159e+06	689785		1.03962e+06			342639
FALSE		High	Unambiguous	MFYEIVVAPGFSEK	[R].MFYEIVVAPGFSEK.[G]			7.47477e-05	5.33751e-05	1.436	2	4	6	731362229; 1108925604	731362229 [416-429]; 1108925604 [415-428]			PREDICTED: uncharacterized protein LOC104905845 isoform X1 [Beta vulgaris subsp. vulgaris] PREDICTED: uncharacterized protein LOC104894138 [Beta vulgaris subsp. vulgaris]	731362231; 1108785125; 731362229; 1108925604	0	1616.8	14	134.4	227.7	47.1	18.9	208.8	132.2	32.7	129.1		69	1977302	6.80743e+06	870797	287188	1.21677e+06	3.25268e+06	412955	2293264		1.44864e+06	4.0184e+06	6.80743e+06	1.4083e+06	564703	6.24236e+06		3.95076e+06
FALSE		High	Unambiguous	MFVLDEADEMLSR	[K].MFVLDEADEMLSR.[G]	2xOxidation [M1; M10]	2xOxidation [M1; M10]	3.17805e-05	5.33751e-05	1.629	2	2	8	731354626; 731317796	731354626 [185-197]; 731317796 [185-197]			PREDICTED: eukaryotic initiation factor 4A-9 [Beta vulgaris subsp. vulgaris] PREDICTED: eukaryotic initiation factor 4A-9 [Beta vulgaris subsp. vulgaris]	731354626; 731317796	0	1587.7	13		11.8			423	110.5	4.4	21	139.1	290.2		497731			3475519	3.83371e+06	77713.4	526767	4274015	8.58366e+06		497731			1.78303e+07		4.65649e+06
FALSE		High	Unambiguous	MFVLDEADEMLSR	[K].MFVLDEADEMLSR.[G]	1xOxidation [M]	1xOxidation [M1; M10]	3.9954e-07	5.33751e-05	2.575	2	2	38	731354626; 731317796	731354626 [185-197]; 731317796 [185-197]			PREDICTED: eukaryotic initiation factor 4A-9 [Beta vulgaris subsp. vulgaris] PREDICTED: eukaryotic initiation factor 4A-9 [Beta vulgaris subsp. vulgaris]	731354626; 731317796	0	1571.71	13	8.5	107.1	50.9	94.4	229.7	127.4	31	63.2	28.1	259.7	799442	2.04962e+07	6.01611e+06	9.18336e+06	8.5644e+06	2.006e+07	2.50333e+06	7.18968e+06	3.91836e+06	3.48759e+07	1.62468e+06	2.04962e+07	9.7296e+06	1.80574e+07	4.39377e+07		2.43652e+07
FALSE		High	Unambiguous	MFVLDEADEMLSR	[K].MFVLDEADEMLSR.[G]			1.92181e-06	5.33751e-05	2.237	2	2	93	731354626; 731317796	731354626 [185-197]; 731317796 [185-197]			PREDICTED: eukaryotic initiation factor 4A-9 [Beta vulgaris subsp. vulgaris] PREDICTED: eukaryotic initiation factor 4A-9 [Beta vulgaris subsp. vulgaris]	731354626; 731317796	0	1555.71	13	122.1	117	59	141.5	62.1	140.2	101.6	96.5	94.8	65.2	1.4787e+08	2.87876e+08	8.9697e+07	1.77104e+08	2.97672e+07	2.83958e+08	1.05524e+08	1.41137e+08	1.70126e+08	1.12516e+08	3.00511e+08	2.87876e+08	1.45063e+08	3.48242e+08	1.52714e+08		3.44901e+08
FALSE		High	Unambiguous	MFVDYNEPQQER	[K].MFVDYNEPQQER.[V]	1xOxidation [M1]	1xOxidation [M1]	4.69807e-05	5.33751e-05	1.542	1	1	1	731329677	731329677 [463-474]			PREDICTED: putative aconitate hydratase, cytoplasmic [Beta vulgaris subsp. vulgaris]	731329677	0	1571.68	12						75.7	56.1		19.8	848.4						899643	341417		208320	8589370							1.09272e+06
FALSE		High	Unambiguous	MFVDYNEPQQER	[K].MFVDYNEPQQER.[V]			7.72776e-06	5.33751e-05	1.937	1	1	45	731329677	731329677 [463-474]			PREDICTED: putative aconitate hydratase, cytoplasmic [Beta vulgaris subsp. vulgaris]	731329677	0	1555.68	12	149.1	93.7	21.6	61	80.4	118.6	125.4	82	121.4	146.8	3.26596e+07	4.17318e+07	5.93736e+06	13808206	6.97855e+06	4.34903e+07	2.35613e+07	2.16891e+07	3.94075e+07	4.58747e+07	6.63729e+07	4.17318e+07	9.60225e+06	2.71513e+07	3.58018e+07		5.2824e+07
FALSE		High	Unambiguous	MFISHTVLSGKYVLR	[K].MFISHTVLSGKYVLR.[L]			3.80678e-05	5.33751e-05	1.589	1	2	1	731347037	731347037 [445-459]			PREDICTED: tyrosine decarboxylase 1 isoform X1 [Beta vulgaris subsp. vulgaris]	731347039; 731347037	1	1750.97	15							99.8	765.3	134.9								107825	1.16502e+06	251796
FALSE		High	Unambiguous	MFVADGGECLLAQSYAK	[R].MFVADGGECLLAQSYAK.[N]	1xCarbamidomethyl [C9]	1xCarbamidomethyl [C9]	4.59944e-06	5.33751e-05	2.049	1	1	4	731363427	731363427 [281-297]			PREDICTED: aspartate aminotransferase, cytoplasmic [Beta vulgaris subsp. vulgaris]	731363427	0	1859.87	17	118.4	296.1				232.5		204.9	92.5	55.6	395386	2009878				1.29951e+06		826793	457879	264696	803527	2009878					1.57841e+06
FALSE		High	Unambiguous	MFVADGGECFIAQSYAK	[R].MFVADGGECFIAQSYAK.[N]	1xCarbamidomethyl [C9]	1xCarbamidomethyl [C9]	6.02416e-08	5.33751e-05	2.982	1	1	42	731353768	731353768 [235-251]			PREDICTED: aspartate aminotransferase, cytoplasmic [Beta vulgaris subsp. vulgaris]	731353768	0	1893.85	17	6.8	211.6	4.5	92.4	79.5	72	44.7	234.6	125.1	128.9	975705	6.20313e+07	809645	1.37745e+07	4544058	1.7363e+07	5.52298e+06	4.08705e+07	2.67274e+07	2.65199e+07	1.98289e+06	6.20313e+07	1.30941e+06	2.70851e+07	2.33122e+07		2.10893e+07
FALSE		High	Unambiguous	MFSTAAPAIEDPGEFPTLGGK	[R].MFSTAAPAIEDPGEFPTLGGK.[-]			8.28842e-07	5.33751e-05	2.418	1	1	40	731360833	731360833 [336-356]			PREDICTED: RNA-binding protein FUS [Beta vulgaris subsp. vulgaris]	731360833	0	2136.03	21	207.9	202.9	1	66.6	43.3	68.4	63.9	128.6	125.2	92.2	18521859	3.67447e+07	116922	6.13065e+06	1.52922e+06	1.02015e+07	4.88275e+06	1.38434e+07	1.65243e+07	1.17199e+07	3.76413e+07	3.67447e+07	189094	1.20548e+07	7.84532e+06		1.23909e+07
FALSE		High	Unambiguous	MFQQTYSHNAPLSMGFGNSAFLAYSSSKGPQLHQQR	[R].MFQQTYSHNAPLSMGFGNSAFLAYSSSKGPQLHQQR.[I]			1.17992e-06	5.33751e-05	2.342	1	1	2	731350490	731350490 [39-74]			PREDICTED: stem-specific protein TSJT1 [Beta vulgaris subsp. vulgaris]	731350490	1	4015.9	36								815.4	87	97.6								3.90717e+06	511289	552268
FALSE		High	Unambiguous	MFQQTYSHNAPLSMGFGNSAFLAYSSSK	[R].MFQQTYSHNAPLSMGFGNSAFLAYSSSK.[G]			8.14938e-08	5.33751e-05	2.917	1	1	10	731350490	731350490 [39-66]			PREDICTED: stem-specific protein TSJT1 [Beta vulgaris subsp. vulgaris]	731350490	0	3071.4	28	67.2	3.4		35	7.1	41.9	33.5	464	211.1	136.7	2.28081e+06	232635		1.22746e+06	95437.3	2.3786e+06	975052	1.90217e+07	1.06151e+07	6.61804e+06	4.6352e+06	232635		2.41358e+06	489619		2.88909e+06
FALSE		High	Unambiguous	MFNGEHINSTENR	[R].MFNGEHINSTENR.[S]			2.74851e-05	5.33751e-05	1.661	1	1	9	731333012	731333012 [81-93]			PREDICTED: glucose-6-phosphate isomerase, cytosolic [Beta vulgaris subsp. vulgaris]	731333012	0	1548.69	13	132.6	89	136.4	146.6	163.3		14.2	79.2	184.2	54.4	4482038	6.11266e+06	5.7939e+06	5.12098e+06	2.1864e+06		410659	3.23346e+06	9.21982e+06	2.62282e+06	9.10868e+06	6.11266e+06	9.37023e+06	1.00695e+07	1.12168e+07
FALSE		High	Unambiguous	MFNDDVQGTAGVALAGLLGAVR	[R].MFNDDVQGTAGVALAGLLGAVR.[A]			1.21165e-08	5.33751e-05	3.327	1	1	14	731360725	731360725 [305-326]			PREDICTED: NAD-dependent malic enzyme 65 kDa isoform, mitochondrial [Beta vulgaris subsp. vulgaris]	731360725	0	2175.12	22	212.2	193.5	19.1	154.7	16.5	76	50.4	104.6	95.8	77.3	6.41011e+06	1.18774e+07	726604	4.83086e+06	197398	3.84067e+06	1.30605e+06	3.8181e+06	4.28616e+06	3.3289e+06	1.3027e+07	1.18774e+07	1.17511e+06	9.49899e+06	1.0127e+06		4.66494e+06
FALSE		High	Unambiguous	MFMEDVPTYK	[R].MFMEDVPTYK.[F]			8.03868e-05	5.33751e-05	1.419	1	1	28	731360654	731360654 [247-256]			PREDICTED: ferredoxin--NADP reductase, root isozyme, chloroplastic [Beta vulgaris subsp. vulgaris]	731360654	0	1260.56	10	95.9	204.6	91.4	47.7	28	96.4	113	119.6	120.8	82.7	5.99442e+06	2.60011e+07	7.17947e+06	3.08234e+06	694657	1.00888e+07	6.05707e+06	9.03191e+06	1.1191e+07	7.37537e+06	1.21822e+07	2.60011e+07	1.16111e+07	6.06086e+06	3.56378e+06		1.2254e+07
FALSE		High	Unambiguous	MFLVDWFYGVLASLGLWQKEAK	[-].MFLVDWFYGVLASLGLWQKEAK.[I]	1xAcetyl [N-Term]	1xAcetyl [N-Term]	2.05531e-07	5.33751e-05	2.718	1	1	6	731326764	731326764 [1-22]	731326764 1xAcetyl [N-Term]	731326764 1xAcetyl [N-Term]	PREDICTED: GTP-binding protein SAR1A [Beta vulgaris subsp. vulgaris]	731326764	1	2643.37	22									1000										5.44607e+06
FALSE		High	Unambiguous	MFVADGGECFIAQSYAK	[R].MFVADGGECFIAQSYAK.[N]	1xCarbamidomethyl [C9]; 1xOxidation [M1]	1xCarbamidomethyl [C9]; 1xOxidation [M1]	8.49493e-05	5.33751e-05	1.406	1	1	1	731353768	731353768 [235-251]			PREDICTED: aspartate aminotransferase, cytoplasmic [Beta vulgaris subsp. vulgaris]	731353768	0	1909.85	17						72.7				927.3						134592				1464236							163478
FALSE		High	Unambiguous	MDTGAPAKPVQPISIFGSSTLGHHLGRR	[-].MDTGAPAKPVQPISIFGSSTLGHHLGRR.[L]	1xAcetyl [N-Term]	1xAcetyl [N-Term]	1.09538e-06	5.33751e-05	2.358	1	1	16	731350099	731350099 [1-28]	731350099 1xAcetyl [N-Term]	731350099 1xAcetyl [N-Term]	PREDICTED: pyruvate decarboxylase 1 [Beta vulgaris subsp. vulgaris]	731350099	1	2972.55	28	162.1	47.7	32.5	65.9	584.2	24.3	38.7	12.3	27	5.2	1.55153e+07	9.26935e+06	3.91226e+06	6.51902e+06	2.21515e+07	3.88971e+06	3.18024e+06	1.42202e+06	3.83235e+06	710585	3.15313e+07	9.26935e+06	6.32713e+06	1.28185e+07	1.13643e+08		4.7245e+06
FALSE		High	Unambiguous	MDTGAPAKPVQPISIFGSSTLGHHLGR	[-].MDTGAPAKPVQPISIFGSSTLGHHLGR.[R]	1xAcetyl [N-Term]	1xAcetyl [N-Term]	1.68505e-11	5.33751e-05	4.742	1	1	58	731350099	731350099 [1-27]	731350099 1xAcetyl [N-Term]	731350099 1xAcetyl [N-Term]	PREDICTED: pyruvate decarboxylase 1 [Beta vulgaris subsp. vulgaris]	731350099	0	2816.45	27	109.2	122.7	73.3	110.2	86.4	95.9	98	120.4	79.9	104	2.35754e+07	5.38251e+07	1.98912e+07	2.45942e+07	7.39311e+06	3.46346e+07	1.81486e+07	3.14055e+07	2.55764e+07	3.20307e+07	4.79115e+07	5.38251e+07	3.21692e+07	4.83599e+07	3.79286e+07		4.20678e+07
FALSE		High	Unambiguous	MDTDVVMVPAGEGSSTGGPSSK	[-].MDTDVVMVPAGEGSSTGGPSSK.[K]	1xAcetyl [N-Term]	1xAcetyl [N-Term]	1.29037e-05	5.33751e-05	1.826	1	1	1	731348059	731348059 [1-22]	731348059 1xAcetyl [N-Term]	731348059 1xAcetyl [N-Term]	PREDICTED: RING-box protein 1a [Beta vulgaris subsp. vulgaris]	731348059	0	2150.96	22
FALSE		High	Unambiguous	MATKVYIVYYSMYGHVHK	[-].MATKVYIVYYSMYGHVHK.[L]	1xMet-loss+Acetyl [N-Term]	1xMet-loss+Acetyl [N-Term]	1.91291e-06	5.33751e-05	2.238	1	1	65	731365038	731365038 [1-18]	731365038 1xMet-loss+Acetyl [N-Term]	731365038 1xMet-loss+Acetyl [N-Term]	PREDICTED: NAD(P)H dehydrogenase (quinone) FQR1 isoform X1 [Beta vulgaris subsp. vulgaris]	731365038	1	2101.06	18	9.2	43	0.8	66.1	63.8	3.5	69.1	527.4	150	67.1	4.8333e+06	4.57049e+07	524628	3.57154e+07	1.32044e+07	3.04287e+06	3.0945e+07	3.32946e+08	1.16131e+08	4.99983e+07	9.82253e+06	4.57049e+07	848459	7.02278e+07	6.77419e+07		3.69592e+06
FALSE		High	Unambiguous	MATGTAPPRGSAAAAASLRR	[-].MATGTAPPRGSAAAAASLRR.[R]	1xMet-loss [N-Term]	1xMet-loss [N-Term]	2.52075e-05	5.33751e-05	1.68	1	1	17	731361040	731361040 [1-20]	731361040 1xMet-loss [N-Term]	731361040 1xMet-loss [N-Term]	PREDICTED: protein transport protein Sec61 subunit beta [Beta vulgaris subsp. vulgaris]	731361040	2	1781.97	20	384.9	44.4	20.8	161.5	35.7	8.3	56.9	86.1	175.5	25.9	2.84525e+07	6.6662e+06	1.93002e+06	1.23384e+07	1.04576e+06	1.02839e+06	3.6091e+06	7.69303e+06	1.92254e+07	2.72807e+06	5.78229e+07	6.6662e+06	3.12134e+06	2.42612e+07	5.36503e+06		1.24909e+06
FALSE		High	Unambiguous	MATGTAPPRGSAAAAASLR	[-].MATGTAPPRGSAAAAASLR.[R]	1xMet-loss [N-Term]	1xMet-loss [N-Term]	1.77589e-06	5.33751e-05	2.254	1	1	6	731361040	731361040 [1-19]	731361040 1xMet-loss [N-Term]	731361040 1xMet-loss [N-Term]	PREDICTED: protein transport protein Sec61 subunit beta [Beta vulgaris subsp. vulgaris]	731361040	1	1625.87	19	243.2	118.3		26.5	14.7	44	120.9	159.5	169.7	103.1	4.39425e+06	4.34537e+06		494925	104943	1.32985e+06	1.87404e+06	3.48204e+06	4.54376e+06	2.65765e+06	8.93027e+06	4.34537e+06		973179	538384		1.61526e+06
FALSE		High	Unambiguous	MATGQLFSKTTQALFYNYKQLPIQR	[-].MATGQLFSKTTQALFYNYKQLPIQR.[M]	1xMet-loss+Acetyl [N-Term]	1xMet-loss+Acetyl [N-Term]	1.70318e-06	5.33751e-05	2.263	1	1	16	731322146	731322146 [1-25]	731322146 1xMet-loss+Acetyl [N-Term]	731322146 1xMet-loss+Acetyl [N-Term]	PREDICTED: ATP-citrate synthase beta chain protein 2 [Beta vulgaris subsp. vulgaris]	731322146	2	2858.52	25	12.9	48.1	15.3	104.4	186.6		20.8	378.2	129.7	103.9	424124	3.22356e+06	635289	3.55488e+06	2.4355e+06		588514	1.50493e+07	6.3317e+06	4.88105e+06	861930	3.22356e+06	1.02743e+06	6.99002e+06	1.24947e+07
FALSE		High	Unambiguous	MATGQLFSK	[-].MATGQLFSK.[T]	1xMet-loss+Acetyl [N-Term]	1xMet-loss+Acetyl [N-Term]	0.000109023	5.33751e-05	1.346	1	1	10	731322146	731322146 [1-9]	731322146 1xMet-loss+Acetyl [N-Term]	731322146 1xMet-loss+Acetyl [N-Term]	PREDICTED: ATP-citrate synthase beta chain protein 2 [Beta vulgaris subsp. vulgaris]	731322146	0	893.473	9	192.2	136.8	0.8	19.9	27.6	152.1	153.3	37.1	202	78.1	7.5295e+06	1.08891e+07	39990.8	804799	428212	9.97119e+06	5.15059e+06	1755969	1.17199e+07	4.36487e+06	1.53019e+07	1.08891e+07	64675.5	1.58249e+06	2.19684e+06		1.21112e+07
FALSE		High	Unambiguous	MATFSEAPAGNKDGGAKIFK	[-].MATFSEAPAGNKDGGAKIFK.[M]	1xMet-loss+Acetyl [N-Term]	1xMet-loss+Acetyl [N-Term]	2.74851e-05	5.33751e-05	1.661	1	1	10	731359880	731359880 [1-20]	731359880 1xMet-loss+Acetyl [N-Term]	731359880 1xMet-loss+Acetyl [N-Term]	PREDICTED: cytochrome c [Beta vulgaris subsp. vulgaris]	731359880	2	1950.99	20	398.2	54.5	14.7	87.3	140.4	17.9	54.3	90.4	67.8	74.4	1.32173e+07	3.67657e+06	614807	2.99572e+06	1.84625e+06	992909	1.5441e+06	3.6245e+06	3.33584e+06	3.52167e+06	2.6861e+07	3.67657e+06	994302	5.89054e+06	9.47173e+06		1.206e+06
FALSE		High	Unambiguous	MATFSEAPAGNKDGGAK	[-].MATFSEAPAGNKDGGAK.[I]	1xMet-loss+Acetyl [N-Term]	1xMet-loss+Acetyl [N-Term]	3.97687e-07	5.33751e-05	2.576	1	1	22	731359880	731359880 [1-17]	731359880 1xMet-loss+Acetyl [N-Term]	731359880 1xMet-loss+Acetyl [N-Term]	PREDICTED: cytochrome c [Beta vulgaris subsp. vulgaris]	731359880	1	1562.74	17	76.5	51.2	55	66	53.6	160.5	166	71	114.9	185.3	1.41135e+07	19189667	1.27405e+07	1.25719e+07	3.91694e+06	4.95393e+07	2.62618e+07	15808619	3.14028e+07	4.87326e+07	2.86823e+07	19189667	2.06047e+07	2.47204e+07	2.0095e+07		6.01713e+07
FALSE		High	Unambiguous	MATFIGALAIVDLIKTTLGPK	[R].MATFIGALAIVDLIKTTLGPK.[G]			4.78948e-07	5.33751e-05	2.536	1	1	7	731323478	731323478 [21-41]			PREDICTED: T-complex protein 1 subunit beta [Beta vulgaris subsp. vulgaris]	731323478	1	2173.27	21		0.9		160.2	59.5		39.8	421	148.2	170.4		13729		1.2878e+06	183289		265220	3954831	1.70779e+06	1.88971e+06		13729		2.53221e+06	940321
FALSE		High	Unambiguous	MATKVYIVYYSMYGHVHK	[-].MATKVYIVYYSMYGHVHK.[L]	1xOxidation [M12]; 1xMet-loss+Acetyl [N-Term]	1xOxidation [M12]; 1xMet-loss+Acetyl [N-Term]	5.43807e-05	5.33751e-05	1.509	1	1	5	731365038	731365038 [1-18]	731365038 1xMet-loss+Acetyl [N-Term]	731365038 1xMet-loss+Acetyl [N-Term]	PREDICTED: NAD(P)H dehydrogenase (quinone) FQR1 isoform X1 [Beta vulgaris subsp. vulgaris]	731365038	1	2117.05	18		22.8	6	31.3	518			7.3		414.6		460643	74939.6	321489	2.04066e+06			88155.4		5.88048e+06		460643	121197	632149	1.04691e+07
FALSE		High	Unambiguous	MATFIGALAIVDLIK	[R].MATFIGALAIVDLIK.[T]			1.31912e-06	5.33751e-05	2.318	1	1	28	731323478	731323478 [21-35]			PREDICTED: T-complex protein 1 subunit beta [Beta vulgaris subsp. vulgaris]	731323478	0	1575.92	15	142.9	123	50.1	72.6	44.9	12.4	46.6	269.4	148.4	89.7	1.06335e+07	1.85949e+07	4.68234e+06	5.58573e+06	1.32428e+06	1.54055e+06	2.97443e+06	2.42216e+07	1.63615e+07	9.5229e+06	2.161e+07	1.85949e+07	7.57256e+06	1.09833e+07	6.79389e+06		1.87118e+06
FALSE		High	Unambiguous	MATELEELLDFLSSPSPPLKR	[-].MATELEELLDFLSSPSPPLKR.[A]	1xMet-loss+Acetyl [N-Term]	1xMet-loss+Acetyl [N-Term]	2.31935e-07	5.33751e-05	2.692	1	1	3	731344053	731344053 [1-21]	731344053 1xMet-loss+Acetyl [N-Term]	731344053 1xMet-loss+Acetyl [N-Term]	PREDICTED: protein HGH1 homolog [Beta vulgaris subsp. vulgaris]	731344053	1	2284.21	21	555.9	43	21.3		47.5	10.8	36.8	233.4	39.7	11.7	4.07187e+06	640445	195773		137964	132259	231189	2.06526e+06	430669	121824	8.27511e+06	640445	316616		707792		160644
FALSE		High	Unambiguous	MATEGAEQGDVASEQHDSDSGTKR	[K].MATEGAEQGDVASEQHDSDSGTKR.[K]			2.30859e-07	5.33751e-05	2.693	1	1	7	731353535	731353535 [168-191]			PREDICTED: far upstream element-binding protein 1-like [Beta vulgaris subsp. vulgaris]	731353535	1	2506.07	24	307.8	85.2		106.7		140.9	100.2	76.4	160	22.9	2.6368e+06	1.48259e+06		944998		2.01982e+06	736074	790338	2.03071e+06	280027	5.35868e+06	1.48259e+06		1.85816e+06			2.45331e+06
FALSE		High	Unambiguous	MATEGAEQGDVASEQHDSDSGTK	[K].MATEGAEQGDVASEQHDSDSGTK.[R]			2.19813e-05	5.33751e-05	1.71	1	1	1	731353535	731353535 [168-190]			PREDICTED: far upstream element-binding protein 1-like [Beta vulgaris subsp. vulgaris]	731353535	0	2349.97	23		1000										294168										294168
FALSE		High	Unambiguous	MATDLPMNPQMEQIHGEIRDNFR	[-].MATDLPMNPQMEQIHGEIRDNFR.[A]	1xMet-loss+Acetyl [N-Term]	1xMet-loss+Acetyl [N-Term]	1.06032e-06	5.33751e-05	2.365	1	1	3	731323765	731323765 [1-23]	731323765 1xMet-loss+Acetyl [N-Term]	731323765 1xMet-loss+Acetyl [N-Term]	PREDICTED: novel plant SNARE 13 [Beta vulgaris subsp. vulgaris]	731323765	1	2654.24	23	305.5	27.4	25.5	12.9	24.2	157.3	33.5	222.4		191.4	4331795	788752	454118	189196	135836	3.7317e+06	407840	3.8103e+06		3871138	8.80334e+06	788752	734427	372019	696877		4.53259e+06
FALSE		High	Unambiguous	MASVDVAVFEHGEVDKK	[-].MASVDVAVFEHGEVDKK.[V]	1xMet-loss+Acetyl [N-Term]	1xMet-loss+Acetyl [N-Term]	7.86903e-05	5.33751e-05	1.424	1	1	1	731325181	731325181 [1-17]	731325181 1xMet-loss+Acetyl [N-Term]	731325181 1xMet-loss+Acetyl [N-Term]	PREDICTED: selenium-binding protein 1 [Beta vulgaris subsp. vulgaris]	731325181	1	1771.89	17	664.9		25.8	82.2		109.3	28.5	89.2			1.60448e+06		78204.3	205047		441237	59063.5	260148			3.26073e+06		126477	403188			535934
FALSE		High	Unambiguous	MASTKERENFVYIAK	[-].MASTKERENFVYIAK.[L]	1xMet-loss+Acetyl [N-Term]	1xMet-loss+Acetyl [N-Term]	1.18214e-05	5.33751e-05	1.845	1	1	22	731356855	731356855 [1-15]	731356855 1xMet-loss+Acetyl [N-Term]	731356855 1xMet-loss+Acetyl [N-Term]	PREDICTED: 14-3-3-like protein D [Beta vulgaris subsp. vulgaris]	731356855	2	1697.89	15	72.4	13.6	1.8	22.6	799.7	1.1	12.5	38.9	17.7	19.6	4.15357e+07	1.58763e+07	1283178	1.34048e+07	1.81633e+08	1.05125e+06	6.14247e+06	2.69738e+07	1.50033e+07	1.60228e+07	8.44115e+07	1.58763e+07	2.07523e+06	2.6358e+07	9.31823e+08		1.27687e+06
FALSE		High	Unambiguous	MASTFVGNSTSIQEMFR	[K].MASTFVGNSTSIQEMFR.[R]			1.05051e-06	5.33751e-05	2.367	1	1	10	731360530	731360530 [368-384]			PREDICTED: tubulin beta chain [Beta vulgaris subsp. vulgaris]	731360530	0	1905.88	17	168	222.7	2.3	21.9	17.5	89.3	42.1	251.5	136.9	47.9	4.54574e+06	1.22452e+07	77634.7	612037	187066	4.0431e+06	976768	8.22126e+06	5.48663e+06	1.84941e+06	9.23813e+06	1.22452e+07	125555	1.20346e+06	959696		4.91081e+06
FALSE		High	Unambiguous	MASTFIGNSTSIQEMFR	[K].MASTFIGNSTSIQEMFR.[R]			5.11704e-06	5.33751e-05	2.026	2	2	7	731331094; 731348756	731331094 [363-379]; 731348756 [363-379]			PREDICTED: tubulin beta-1 chain [Beta vulgaris subsp. vulgaris] PREDICTED: tubulin beta-1 chain [Beta vulgaris subsp. vulgaris]	731331094; 731348756	0	1919.9	17	240.9	386.6	3.5	26	62.5	65	29.5	114	41.3	30.8	4.59761e+06	1.49988e+07	82804.6	511993	472519	2.07558e+06	483546	2.62957e+06	1.16832e+06	837644	9.34354e+06	1.49988e+07	133917	1.00674e+06	2.42415e+06		2.52104e+06
FALSE		High	Unambiguous	MATEVAQSTPLPETQAPIEVIK	[-].MATEVAQSTPLPETQAPIEVIK.[A]	1xMet-loss+Acetyl [N-Term]	1xMet-loss+Acetyl [N-Term]	2.94234e-05	5.33751e-05	1.646	1	1	18	731350848	731350848 [1-22]	731350848 1xMet-loss+Acetyl [N-Term]	731350848 1xMet-loss+Acetyl [N-Term]	PREDICTED: fibrous sheath CABYR-binding protein [Beta vulgaris subsp. vulgaris]	731350848	0	2264.2	22	34.7	73.3	3.7	37.7	37.1	175.1	90.9	189	160.9	197.7	844819	3.6327e+06	114223	950241	358397	7.14211e+06	1.89992e+06	5.56541e+06	5.81068e+06	6.8741e+06	1.71689e+06	3.6327e+06	184729	1.86848e+06	1.83867e+06		8.67492e+06
FALSE		High	Unambiguous	MASSTSEQKKPVVHVEFTK	[-].MASSTSEQKKPVVHVEFTK.[G]	1xMet-loss+Acetyl [N-Term]	1xMet-loss+Acetyl [N-Term]	6.88329e-06	5.33751e-05	1.962	1	1	2	731354193	731354193 [1-19]	731354193 1xMet-loss+Acetyl [N-Term]	731354193 1xMet-loss+Acetyl [N-Term]	PREDICTED: putative glucose-6-phosphate 1-epimerase [Beta vulgaris subsp. vulgaris]	731354193	1	2044.07	19	430.4	291.3		170.3		7.2	3.4	97.4			2.90164e+06	3.99084e+06		1186316		81573.2	19918.8	792938			5.89689e+06	3.99084e+06		2.33267e+06			99080.2
FALSE		High	Unambiguous	MATKVYIVYYSMYGHVHKLAEEIQK	[-].MATKVYIVYYSMYGHVHKLAEEIQK.[G]	1xMet-loss+Acetyl [N-Term]	1xMet-loss+Acetyl [N-Term]	1.83834e-07	5.33751e-05	2.742	1	1	40	731365038	731365038 [1-25]	731365038 1xMet-loss+Acetyl [N-Term]	731365038 1xMet-loss+Acetyl [N-Term]	PREDICTED: NAD(P)H dehydrogenase (quinone) FQR1 isoform X1 [Beta vulgaris subsp. vulgaris]	731365038	2	2912.5	25	4.7	37.2	19.7	312.1	4.3	8.9	34.9	452.7	113.9	11.6	1.43855e+06	2.30688e+07	7.54764e+06	9.83409e+07	515006	4.51797e+06	9.12163e+06	1.66704e+08	5.14443e+07	5.04837e+06	2.9235e+06	2.30688e+07	1.22065e+07	1.93369e+08	2.64212e+06		5.4876e+06
FALSE		High	Unambiguous	MATLIAPDHADPFADAEALHKACK	[-].MATLIAPDHADPFADAEALHKACK.[G]	1xCarbamidomethyl [C23]; 1xMet-loss+Acetyl [N-Term]	1xCarbamidomethyl [C23]; 1xMet-loss+Acetyl [N-Term]	1.26097e-05	5.33751e-05	1.831	1	1	1	731319763	731319763 [1-24]	731319763 1xMet-loss+Acetyl [N-Term]	731319763 1xMet-loss+Acetyl [N-Term]	PREDICTED: annexin-like protein RJ4 [Beta vulgaris subsp. vulgaris]	731319763	1	2504.22	24	48.2				920.4					31.4	98134.6				742235					91196.7	199435				3.80786e+06
FALSE		High	Unambiguous	MATVDKAEELLEK	[K].MATVDKAEELLEK.[L]			9.35292e-07	5.33751e-05	2.392	1	1	9	731343756	731343756 [407-419]			PREDICTED: probable cytosolic oligopeptidase A [Beta vulgaris subsp. vulgaris]	731343756	1	1476.76	13	74.7	61	149.3	89.7	181.1	86.9	56.1	91.1	120.8	89.2	3216418	5.33262e+06	8.07709e+06	3.99185e+06	3.08826e+06	6.25994e+06	2.07214e+06	4.7345e+06	7.70349e+06	5.47811e+06	6.53661e+06	5.33262e+06	1.30627e+07	7.84924e+06	1.58436e+07		7.60342e+06
FALSE		High	Unambiguous	MATTNPFDLLDDDAEDPALLIAAQEQKVSAVVAGDKK	[-].MATTNPFDLLDDDAEDPALLIAAQEQKVSAVVAGDKK.[T]	1xMet-loss+Acetyl [N-Term]	1xMet-loss+Acetyl [N-Term]	7.88846e-08	5.33751e-05	2.924	1	1	3	731332271	731332271 [1-37]	731332271 1xMet-loss+Acetyl [N-Term]	731332271 1xMet-loss+Acetyl [N-Term]	PREDICTED: plasminogen activator inhibitor 1 RNA-binding protein [Beta vulgaris subsp. vulgaris]	731332271	2	3810.93	37	466.8	420.9							112.3		1.43646e+06	2632592							512002		2.91926e+06	2632592
FALSE		High	Unambiguous	MATTNPFDLLDDDAEDPALLIAAQEQK	[-].MATTNPFDLLDDDAEDPALLIAAQEQK.[V]	1xMet-loss+Acetyl [N-Term]	1xMet-loss+Acetyl [N-Term]	4.50865e-07	5.33751e-05	2.549	1	1	17	731332271	731332271 [1-27]	731332271 1xMet-loss+Acetyl [N-Term]	731332271 1xMet-loss+Acetyl [N-Term]	PREDICTED: plasminogen activator inhibitor 1 RNA-binding protein [Beta vulgaris subsp. vulgaris]	731332271	0	2856.38	27	41.9	216	40.3	81.8	173.8	55.1	79.4	92.7	131.5	87.5	2.45964e+06	2.57408e+07	2.96638e+06	4.95764e+06	4.03728e+06	5.40803e+06	3.99461e+06	6.5696e+06	1.14252e+07	7.32044e+06	4.99863e+06	2.57408e+07	4.79741e+06	9.74829e+06	2.07123e+07		6.56868e+06
FALSE		High	Unambiguous	MATSVVEFGTK	[K].MATSVVEFGTK.[S]			4.67719e-05	5.33751e-05	1.543	1	1	4	731345136	731345136 [67-77]			PREDICTED: purple acid phosphatase 22 [Beta vulgaris subsp. vulgaris]	731345136	0	1169.59	11	70.3	174.3	80		330.8		21.5	205.3	92.4	25.5	672339	3.38641e+06	960771		1.2527e+06		175967	2.37076e+06	1.30857e+06	347461	1.36637e+06	3.38641e+06	1.55382e+06		6.42667e+06
FALSE		High	Unambiguous	MATSTLVSEMKVEDYAFPSTVK	[-].MATSTLVSEMKVEDYAFPSTVK.[A]	1xMet-loss+Acetyl [N-Term]	1xMet-loss+Acetyl [N-Term]	2.46394e-05	5.33751e-05	1.685	1	1	2	731318554	731318554 [1-22]	731318554 1xMet-loss+Acetyl [N-Term]	731318554 1xMet-loss+Acetyl [N-Term]	PREDICTED: chalcone--flavonone isomerase [Beta vulgaris subsp. vulgaris]	731318554	1	2345.16	22	111.8	340.9		58	103.3	12.7	78.8	206.5	81.4	6.6	531072	3290028		284499	194415	101278	320872	1.18447e+06	573082	44497.9	1.07928e+06	3290028		559415	997401		123015
FALSE		High	Unambiguous	GKAAVAQAILAYQLYQKK	[R].GKAAVAQAILAYQLYQKK.[F]	1xGG [K2]	1xGG [K2]	0.000732111	0.000154279	0.925	1	1	1	731342915	731342915 [295-312]			PREDICTED: uncharacterized protein LOC104897452 [Beta vulgaris subsp. vulgaris]	731342915	2	2078.18	18
FALSE		High	Unambiguous	MATSLSVEKTTSGREYK	[-].MATSLSVEKTTSGREYK.[V]	1xMet-loss+Acetyl [N-Term]	1xMet-loss+Acetyl [N-Term]	1.34637e-07	5.33751e-05	2.809	1	1	27	731325197	731325197 [1-17]	731325197 1xMet-loss+Acetyl [N-Term]	731325197 1xMet-loss+Acetyl [N-Term]	PREDICTED: adenosylhomocysteinase [Beta vulgaris subsp. vulgaris]	731325197	2	1798.92	17	245.3	47.4		136.4	72.7	17.7	96.4	177.4	108.2	98.4	3.67782e+07	14435502		2.11384e+07	4.31675e+06	4.42984e+06	1.23886e+07	3.21316e+07	2.40417e+07	2.10439e+07	7.4743e+07	14435502		4.15647e+07	2.21461e+07		5.38055e+06
FALSE		High	Unambiguous	FIAPILADFAKR	[R].FIAPILADFAKR.[F]	1xGG [K11]	1xGG [K11]	0.000918665	0.000154279	0.888	1	1	1	731312101	731312101 [42-53]			PREDICTED: thioredoxin H-type [Beta vulgaris subsp. vulgaris]	731312101	1	1475.84	12
FALSE		High	Unambiguous	MATLIAPDHADPFADAEALHK	[-].MATLIAPDHADPFADAEALHK.[A]	1xMet-loss+Acetyl [N-Term]	1xMet-loss+Acetyl [N-Term]	4.46693e-07	5.33751e-05	2.551	1	1	16	731319763	731319763 [1-21]	731319763 1xMet-loss+Acetyl [N-Term]	731319763 1xMet-loss+Acetyl [N-Term]	PREDICTED: annexin-like protein RJ4 [Beta vulgaris subsp. vulgaris]	731319763	0	2145.06	21	228.4	182.2		73.4	52.7	236.4	49	82.9	54.2	40.8	1.43405e+07	2.32457e+07		4.76165e+06	1.31109e+06	2.48308e+07	2.63902e+06	6.28369e+06	5041030	3.64893e+06	2.91436e+07	2.32457e+07		9.36291e+06	6.72624e+06		3.01599e+07
FALSE		High	Unambiguous	MATSLSVEKTTSGR	[-].MATSLSVEKTTSGR.[E]	1xMet-loss+Acetyl [N-Term]	1xMet-loss+Acetyl [N-Term]	2.39062e-06	5.33751e-05	2.19	1	1	22	731325197	731325197 [1-14]	731325197 1xMet-loss+Acetyl [N-Term]	731325197 1xMet-loss+Acetyl [N-Term]	PREDICTED: adenosylhomocysteinase [Beta vulgaris subsp. vulgaris]	731325197	1	1378.72	14	211.9	80.1		59.5	65.7		170.7	135.3	138.9	137.9	2.53807e+07	1.94999e+07		7.36241e+06	3.1183e+06		1.75288e+07	1.95803e+07	2.46383e+07	2.35509e+07	5.15803e+07	1.94999e+07		1.44768e+07	1.59977e+07
FALSE		High	Unambiguous	MATQTDVSSSDFSAETVGHAFVSQFYR	[-].MATQTDVSSSDFSAETVGHAFVSQFYR.[I]	1xMet-loss+Acetyl [N-Term]	1xMet-loss+Acetyl [N-Term]	4.39149e-08	5.33751e-05	3.05	1	1	12	731339119	731339119 [1-27]	731339119 1xMet-loss+Acetyl [N-Term]	731339119 1xMet-loss+Acetyl [N-Term]	PREDICTED: ras GTPase-activating protein-binding protein 1 [Beta vulgaris subsp. vulgaris]	731339119	0	2879.31	27	159.7	162.3	6.4	80.6	84.9	37.9	23.7	268.2	103.4	73.1	4.97632e+06	10279863	249043	2.59509e+06	1.04871e+06	1.97913e+06	632805	1.00974e+07	4.773e+06	3.24866e+06	1.01132e+07	10279863	402766	5.10277e+06	5.38014e+06		2.40388e+06
FALSE		High	Unambiguous	MATPLIAGLAVAAAALAGR	[-].MATPLIAGLAVAAAALAGR.[Y]	1xMet-loss+Acetyl [N-Term]	1xMet-loss+Acetyl [N-Term]	7.17632e-07	5.33751e-05	2.449	1	2	2	731318349	731318349 [1-19]	731318349 1xMet-loss+Acetyl [N-Term]	731318349 1xMet-loss+Acetyl [N-Term]	PREDICTED: mitochondrial import inner membrane translocase subunit TIM14-1 isoform X1 [Beta vulgaris subsp. vulgaris]	1108883513; 731318349	0	1648.97	19		115			285	100.4	419.2	80.4				1.01055e+06			488196	726572	1.55452e+06	420033				1.01055e+06			2.50458e+06		882506
FALSE		High	Unambiguous	MATMVSSAGALLAMLSENHPSLK	[-].MATMVSSAGALLAMLSENHPSLK.[L]	1xMet-loss+Acetyl [N-Term]	1xMet-loss+Acetyl [N-Term]	4.92493e-07	5.33751e-05	2.53	1	1	1	731325288	731325288 [1-23]	731325288 1xMet-loss+Acetyl [N-Term]	731325288 1xMet-loss+Acetyl [N-Term]	PREDICTED: 26S proteasome non-ATPase regulatory subunit 1 homolog A [Beta vulgaris subsp. vulgaris]	731325288	0	2270.15	23		619.7		380.3								2.58116e+06		805473								2.58116e+06		1.58381e+06
FALSE		High	Unambiguous	MATMESLIGLVNKIQR	[-].MATMESLIGLVNKIQR.[A]	1xMet-loss+Acetyl [N-Term]	1xMet-loss+Acetyl [N-Term]	1.8092e-06	5.33751e-05	2.25	1	1	8	731314662	731314662 [1-16]	731314662 1xMet-loss+Acetyl [N-Term]	731314662 1xMet-loss+Acetyl [N-Term]	PREDICTED: dynamin-related protein 1C [Beta vulgaris subsp. vulgaris]	731314662	1	1714.95	16	15.5	87.8		369.8	131.4		134.9	109.6	151.1		91508.8	1.05093e+06		2.25211e+06	306823		681465	780010	1.31875e+06		185970	1.05093e+06		4.42837e+06	1.57408e+06
FALSE		High	Unambiguous	MATMESLIGLVNK	[-].MATMESLIGLVNK.[I]	1xMet-loss+Acetyl [N-Term]	1xMet-loss+Acetyl [N-Term]	8.45905e-05	5.33751e-05	1.407	1	1	6	731314662	731314662 [1-13]	731314662 1xMet-loss+Acetyl [N-Term]	731314662 1xMet-loss+Acetyl [N-Term]	PREDICTED: dynamin-related protein 1C [Beta vulgaris subsp. vulgaris]	731314662	0	1317.71	13	308.9	272	13.2	45.3	27.1	12.2	46.5	115.2	121	38.5	6.18238e+06	1.10625e+07	330893	937540	214457	408458	798780	2.78589e+06	3.58765e+06	1.09849e+06	1.25642e+07	1.10625e+07	535139	1.8435e+06	1.10022e+06		496119
FALSE		High	Unambiguous	MATIVPTTEEDPALSVVR	[-].MATIVPTTEEDPALSVVR.[F]	1xMet-loss+Acetyl [N-Term]	1xMet-loss+Acetyl [N-Term]	9.73782e-06	5.33751e-05	1.887	1	1	17	731361149	731361149 [1-18]	731361149 1xMet-loss+Acetyl [N-Term]	731361149 1xMet-loss+Acetyl [N-Term]	PREDICTED: eukaryotic translation initiation factor 3 subunit M [Beta vulgaris subsp. vulgaris]	731361149	0	1839.97	18	168	207.2	9.5	38	25.5	71	39.2	126.9	111.9	202.7	4101105	1.02784e+07	291071	958900	246984	2898900	821434	3.74282e+06	4.04575e+06	7.05681e+06	8.33452e+06	1.02784e+07	470736	1.8855e+06	1.26709e+06		3.52105e+06
FALSE		High	Unambiguous	MATLNSPEHTDPLADAEALRK	[-].MATLNSPEHTDPLADAEALRK.[A]	1xMet-loss+Acetyl [N-Term]	1xMet-loss+Acetyl [N-Term]	7.36804e-09	5.33751e-05	3.434	1	1	23	731319761	731319761 [1-21]	731319761 1xMet-loss+Acetyl [N-Term]	731319761 1xMet-loss+Acetyl [N-Term]	PREDICTED: annexin-like protein RJ4 [Beta vulgaris subsp. vulgaris]	731319761	1	2191.1	21	318.6	325.1		2.9	7	65.2	50.5	55	76.7	98.8	22818812	4.73189e+07		217998	199225	7.81152e+06	3.09863e+06	4.76242e+06	8.14209e+06	1.00937e+07	4.63738e+07	4.73189e+07		428654	1.02208e+06		9.488e+06
FALSE		High	Unambiguous	MATLNSPEHTDPLADAEALR	[-].MATLNSPEHTDPLADAEALR.[K]	1xMet-loss+Acetyl [N-Term]	1xMet-loss+Acetyl [N-Term]	7.14302e-06	5.33751e-05	1.954	1	1	11	731319761	731319761 [1-20]	731319761 1xMet-loss+Acetyl [N-Term]	731319761 1xMet-loss+Acetyl [N-Term]	PREDICTED: annexin-like protein RJ4 [Beta vulgaris subsp. vulgaris]	731319761	0	2063	20	312.2	294		49.6	17.2	110.1	34	15.8	75.6	91.4	3.87722e+06	7418974		636356	84608.7	2.28802e+06	362417	237187	1.39172e+06	1.6197e+06	7.87954e+06	7418974		1.25128e+06	434065		2.77906e+06
FALSE		High	Unambiguous	MATRYWMVSLPVQSSASNLWSQLQESVSKQSFDTPLYR	[-].MATRYWMVSLPVQSSASNLWSQLQESVSKQSFDTPLYR.[F]	1xMet-loss+Acetyl [N-Term]	1xMet-loss+Acetyl [N-Term]	5.96264e-06	5.33751e-05	1.993	1	1	4	731363650	731363650 [1-38]	731363650 1xMet-loss+Acetyl [N-Term]	731363650 1xMet-loss+Acetyl [N-Term]	PREDICTED: V-type proton ATPase subunit C [Beta vulgaris subsp. vulgaris]	731363650	2	4332.14	38		180.3	239.3					323.8	256.6			973064	798325					1.03881e+06	1.00939e+06			973064	1.2911e+06
FALSE		High	Unambiguous	MATVDKAEELLEKLR	[K].MATVDKAEELLEKLR.[A]			2.83253e-07	5.33751e-05	2.649	1	1	18	731343756	731343756 [407-421]			PREDICTED: probable cytosolic oligopeptidase A [Beta vulgaris subsp. vulgaris]	731343756	2	1745.95	15	131.9	69.5	2.8	113.1	18.5	218.9	122.8	76.1	71.3	175	4.85291e+06	5.19253e+06	129057	4.30075e+06	270139	1.3474e+07	3.87502e+06	3.37941e+06	3.88497e+06	9.18291e+06	9.86238e+06	5.19253e+06	208719	8.45663e+06	1.38589e+06		1.63657e+07
FALSE		High	Unambiguous	MASSTRVDLDGNPIKPITICMIGAGGFIGSHLCEK	[-].MASSTRVDLDGNPIKPITICMIGAGGFIGSHLCEK.[L]	2xCarbamidomethyl [C20; C33]; 1xMet-loss+Acetyl [N-Term]	2xCarbamidomethyl [C20; C33]; 1xMet-loss+Acetyl [N-Term]	8.4707e-09	5.33751e-05	3.404	1	1	6	731357000	731357000 [1-35]	731357000 1xMet-loss+Acetyl [N-Term]	731357000 1xMet-loss+Acetyl [N-Term]	PREDICTED: UDP-D-apiose/UDP-D-xylose synthase 2 [Beta vulgaris subsp. vulgaris]	731357000	1	3656.82	35	8.1	195.5	87.7	97	2.7	8.1	84.1	274.8	174.4	67.5	234312	11460464	3179012	2.89189e+06	31335.3	388725	2.08028e+06	9.57492e+06	7.45053e+06	2.77835e+06	476184	11460464	5.14129e+06	5.68637e+06	160758		472152
FALSE		High	Unambiguous	MASSGKDSGFEEEEASHIAEELEK	[-].MASSGKDSGFEEEEASHIAEELEK.[S]	1xMet-loss+Acetyl [N-Term]	1xMet-loss+Acetyl [N-Term]	1.1767e-05	5.33751e-05	1.846	1	1	1	731325193	731325193 [1-24]	731325193 1xMet-loss+Acetyl [N-Term]	731325193 1xMet-loss+Acetyl [N-Term]	PREDICTED: partner of Y14 and mago [Beta vulgaris subsp. vulgaris]	731325193	1	2521.12	24	386.3	272.3						156.6	44.9	139.8	1.06788e+06	1.53004e+06						523101	184063	551292	2.17021e+06	1.53004e+06
FALSE		High	Unambiguous	MASEQAIVKNDYQQEQEKDVK	[-].MASEQAIVKNDYQQEQEKDVK.[K]	1xMet-loss+Acetyl [N-Term]	1xMet-loss+Acetyl [N-Term]	9.08245e-09	5.33751e-05	3.389	2	2	32	731322090; 731322094	731322090 [1-21]; 731322094 [1-21]	731322090 1xMet-loss+Acetyl [N-Term]; 731322094 1xMet-loss+Acetyl [N-Term]	731322090 1xMet-loss+Acetyl [N-Term]; 731322094 1xMet-loss+Acetyl [N-Term]	PREDICTED: jasmonate-induced protein homolog [Beta vulgaris subsp. vulgaris] PREDICTED: jasmonate-induced protein homolog [Beta vulgaris subsp. vulgaris]	731322090; 731322094	2	2392.16	21	239.9	140.1	26.3	56.6	62.1	53.4	127.2	86.1	92.4	115.9	9.25646e+07	109856351	1.27511e+07	2.25717e+07	9.48253e+06	3.44689e+07	4.20672e+07	40116440	5.27961e+07	6.37986e+07	1.88116e+08	109856351	2.06218e+07	4.43831e+07	4.86479e+07		4.18665e+07
FALSE		High	Unambiguous	MASENFTDKNAIFRK	[-].MASENFTDKNAIFRK.[L]	1xMet-loss+Acetyl [N-Term]	1xMet-loss+Acetyl [N-Term]	4.81774e-06	5.33751e-05	2.039	1	1	6	731332489	731332489 [1-15]	731332489 1xMet-loss+Acetyl [N-Term]	731332489 1xMet-loss+Acetyl [N-Term]	PREDICTED: probable ADP-ribosylation factor GTPase-activating protein AGD9 [Beta vulgaris subsp. vulgaris]	731332489	2	1682.85	15	241.2	56.9	146.9	101.9	282.8	8.2	17	95.8	24.3	25	6.46298e+06	3.10008e+06	4.94618e+06	2.82234e+06	3.00184e+06	366559	390754	3.10058e+06	966267	953685	1.31345e+07	3.10008e+06	7.99925e+06	5.54962e+06	1.54002e+07		445228
FALSE		High	Unambiguous	MASENFTDKNAIFR	[-].MASENFTDKNAIFR.[K]	1xMet-loss+Acetyl [N-Term]	1xMet-loss+Acetyl [N-Term]	9.73782e-06	5.33751e-05	1.887	1	1	18	731332489	731332489 [1-14]	731332489 1xMet-loss+Acetyl [N-Term]	731332489 1xMet-loss+Acetyl [N-Term]	PREDICTED: probable ADP-ribosylation factor GTPase-activating protein AGD9 [Beta vulgaris subsp. vulgaris]	731332489	1	1554.75	14	192.7	155.2	39	66.2	76.5	84.2	87.9	81.9	109.8	106.5	7.59874e+06	1.24381e+07	1.93178e+06	2.6974e+06	1.19429e+06	5.55694e+06	2.97161e+06	3.90134e+06	6.41521e+06	5.98871e+06	1.54426e+07	1.24381e+07	3.1242e+06	5.30394e+06	6.12701e+06		6.74955e+06
FALSE		High	Unambiguous	MASELTQFQHSQMAAILGPDPTHFETLISHLMSTNNDQR	[-].MASELTQFQHSQMAAILGPDPTHFETLISHLMSTNNDQR.[S]	1xMet-loss+Acetyl [N-Term]	1xMet-loss+Acetyl [N-Term]	8.04843e-09	5.33751e-05	3.415	1	1	5	731364153	731364153 [1-39]	731364153 1xMet-loss+Acetyl [N-Term]	731364153 1xMet-loss+Acetyl [N-Term]	PREDICTED: importin-5 [Beta vulgaris subsp. vulgaris]	731364153	0	4308.04	39	351.6	100.4		307.4	29.6		38.7	78.1		94.3	6.82245e+06	3.95844e+06		6.16447e+06	227653		643652	1.83036e+06		2.61058e+06	1.3865e+07	3.95844e+06		1.21213e+07	1.16792e+06
FALSE		High	Unambiguous	MASEDVKTTESAVSTIVNLAEEAK	[-].MASEDVKTTESAVSTIVNLAEEAK.[I]	1xMet-loss+Acetyl [N-Term]	1xMet-loss+Acetyl [N-Term]	6.69307e-07	5.33751e-05	2.464	1	1	7	731311388	731311388 [1-24]	731311388 1xMet-loss+Acetyl [N-Term]	731311388 1xMet-loss+Acetyl [N-Term]	PREDICTED: mitochondrial adenine nucleotide transporter ADNT1 [Beta vulgaris subsp. vulgaris]	731311388	1	2434.22	24		248.7	32.2	161.1	106.5	5.4	85.8	168.9	117.1	74.3		6.03753e+06	483402	1.98947e+06	503986	107560	878545	2.43662e+06	2.07293e+06	1.26593e+06		6.03753e+06	781786	3.91194e+06	2.58558e+06		130644
FALSE		High	Unambiguous	MASEDNTTELKEEIPDIVPFDPSK	[-].MASEDNTTELKEEIPDIVPFDPSK.[K]	1xMet-loss+Acetyl [N-Term]	1xMet-loss+Acetyl [N-Term]	1.17128e-05	5.33751e-05	1.847	1	1	10	731369934	731369934 [1-24]	731369934 1xMet-loss+Acetyl [N-Term]	731369934 1xMet-loss+Acetyl [N-Term]	PREDICTED: eukaryotic translation initiation factor 2 subunit beta [Beta vulgaris subsp. vulgaris]	731369934	1	2616.26	24	364.5	299.1	11.5	16.2	43.5	34.5		121.8	14.4	94.6	4706974	7.85143e+06	186909	215781	222692	745505		1.89997e+06	274854	1.74197e+06	9.56581e+06	7.85143e+06	302280	424294	1.14247e+06		905502
FALSE		High	Unambiguous	MASDTLDLLKDCQLSVK	[R].MASDTLDLLKDCQLSVK.[Q]	1xCarbamidomethyl [C12]	1xCarbamidomethyl [C12]	5.06659e-05	5.33751e-05	1.525	1	1	4	731341192	731341192 [84-100]			PREDICTED: ATP phosphoribosyltransferase 2, chloroplastic [Beta vulgaris subsp. vulgaris]	731341192	1	1936.97	17	35.4	8.2	364	169.2	108.5	53	79.9	61	108	12.7	158984	74684.8	2051921	784403	192830	398179	307313	330845	717803	81246.1	323097	74684.8	3.31849e+06	1.54238e+06	989268		483635
FALSE		High	Unambiguous	MASDMVHDLVASVGANAPMK	[K].MASDMVHDLVASVGANAPMK.[A]			3.35532e-05	5.33751e-05	1.617	1	1	3	731323870	731323870 [223-242]			PREDICTED: zinc finger CCCH domain-containing protein 14 [Beta vulgaris subsp. vulgaris]	731323870	0	2043.97	20	244	263.7		31.4	77.6		33.5	168.7	139.2	41.9	3.44214e+06	7560068		458534	433375		405849	2.87455e+06	2909262	842527	6.99533e+06	7560068		901624	2.22333e+06
FALSE		High	Unambiguous	EMTVRDAINSALDDEMGADPR	[K].EMTVRDAINSALDDEMGADPR.[V]	2xGG [T3; S10]	2xGG [T3; S10]	0.00134549	0.000154279	0.831	1	1	2	731334617	731334617 [36-56]			PREDICTED: pyruvate dehydrogenase E1 component subunit beta-1, mitochondrial [Beta vulgaris subsp. vulgaris]	731334617	1	2534.12	21
FALSE		High	Unambiguous	MASDDNPELVER	[-].MASDDNPELVER.[V]	1xMet-loss+Acetyl [N-Term]	1xMet-loss+Acetyl [N-Term]	7.03719e-05	5.33751e-05	1.45	1	1	8	1108900526	1108900526 [1-12]	1108900526 1xMet-loss+Acetyl [N-Term]	1108900526 1xMet-loss+Acetyl [N-Term]	PREDICTED: uncharacterized protein LOC104889084 [Beta vulgaris subsp. vulgaris]	1108900526	0	1286.59	12	129.2	189.4	3.5			119.1	163.4	107.8	139.5	148.1	3377233	1.00662e+07	114101			5.21131e+06	3.66329e+06	3.40453e+06	5405545	5.52177e+06	6.86342e+06	1.00662e+07	184531				6.32975e+06
FALSE		High	Unambiguous	MASAMVEDPQEDQLANLTTEDIVR	[-].MASAMVEDPQEDQLANLTTEDIVR.[A]	1xOxidation [M5]; 1xMet-loss+Acetyl [N-Term]	1xOxidation [M5]; 1xMet-loss+Acetyl [N-Term]	0.000105943	5.33751e-05	1.353	2	2	1	731326512; 731336289	731326512 [1-24]; 731336289 [1-24]	731326512 1xMet-loss+Acetyl [N-Term]; 731336289 1xMet-loss+Acetyl [N-Term]	731326512 1xMet-loss+Acetyl [N-Term]; 731336289 1xMet-loss+Acetyl [N-Term]	PREDICTED: 26S protease regulatory subunit 6A homolog [Beta vulgaris subsp. vulgaris] PREDICTED: 26S protease regulatory subunit 6A homolog [Beta vulgaris subsp. vulgaris]	731326512; 731336289	0	2603.21	24	712.7	12.4				37.9	46.2	137.1	14.8	38.9	4384449	154916				389994	243553	1.0192e+06	134602	341227	8.91035e+06	154916					473693
FALSE		High	Unambiguous	MASAMVEDPQEDQLANLTTEDIVR	[-].MASAMVEDPQEDQLANLTTEDIVR.[A]	1xMet-loss+Acetyl [N-Term]	1xMet-loss+Acetyl [N-Term]	2.92621e-07	5.33751e-05	2.642	2	2	22	731326512; 731336289	731326512 [1-24]; 731336289 [1-24]	731326512 1xMet-loss+Acetyl [N-Term]; 731336289 1xMet-loss+Acetyl [N-Term]	731326512 1xMet-loss+Acetyl [N-Term]; 731336289 1xMet-loss+Acetyl [N-Term]	PREDICTED: 26S protease regulatory subunit 6A homolog [Beta vulgaris subsp. vulgaris] PREDICTED: 26S protease regulatory subunit 6A homolog [Beta vulgaris subsp. vulgaris]	731326512; 731336289	0	2587.22	24	189.5	357.5	0.4	55.8	42	25.1	41	149.4	77.3	62.2	8.74872e+06	33548660	22063.9	2.66097e+06	767667	1.93552e+06	1.6251e+06	8.33247e+06	5.29026e+06	4.09409e+06	1.77797e+07	33548660	35683.1	5.23231e+06	3.93833e+06		2.35091e+06
FALSE		High	Unambiguous	MASADQASLGVQEVMLEFR	[-].MASADQASLGVQEVMLEFR.[A]	1xMet-loss+Acetyl [N-Term]	1xMet-loss+Acetyl [N-Term]	2.39606e-07	5.33751e-05	2.685	1	1	16	731318220	731318220 [1-19]	731318220 1xMet-loss+Acetyl [N-Term]	731318220 1xMet-loss+Acetyl [N-Term]	PREDICTED: 26S proteasome regulatory subunit RPN13 [Beta vulgaris subsp. vulgaris]	731318220	0	1992.97	19	135.8	194	17.1	96.1	80.2	24.6	70.7	177.6	121.2	82.7	2.06629e+06	5.99785e+06	327121	1.51177e+06	483195	626600	922082	3.26338e+06	2.73232e+06	1.79419e+06	4.19925e+06	5.99785e+06	529039	2.97261e+06	2.47892e+06		761078
FALSE		High	Unambiguous	MAQVHLSETYACVPSTERGR	[-].MAQVHLSETYACVPSTERGR.[G]	1xCarbamidomethyl [C12]; 1xMet-loss+Acetyl [N-Term]	1xCarbamidomethyl [C12]; 1xMet-loss+Acetyl [N-Term]	2.25057e-06	5.33751e-05	2.203	1	1	7	731340962	731340962 [1-20]	731340962 1xMet-loss+Acetyl [N-Term]	731340962 1xMet-loss+Acetyl [N-Term]	PREDICTED: actin-interacting protein 1-1 [Beta vulgaris subsp. vulgaris]	731340962	1	2203.06	20		293.2		55.3	61.8	11.3	74.1	378.5	125.8			4.14169e+06		397410	170114	131268	441440	3.17828e+06	1.29546e+06			4.14169e+06		781435	872731		159440
FALSE		High	Unambiguous	MAQVHLSETYACVPSTER	[-].MAQVHLSETYACVPSTER.[G]	1xCarbamidomethyl [C12]; 1xMet-loss+Acetyl [N-Term]	1xCarbamidomethyl [C12]; 1xMet-loss+Acetyl [N-Term]	7.56523e-08	5.33751e-05	2.933	1	1	14	731340962	731340962 [1-18]	731340962 1xMet-loss+Acetyl [N-Term]	731340962 1xMet-loss+Acetyl [N-Term]	PREDICTED: actin-interacting protein 1-1 [Beta vulgaris subsp. vulgaris]	731340962	0	1989.93	18	60.2	64.4	24.9	28.9	11.7	176.1	106.2	220.8	129.1	177.8	640875	1.3939e+06	332436	318024	49396	3.13572e+06	969419	2.83884e+06	2.03522e+06	2.69867e+06	1.30243e+06	1.3939e+06	537635	625336	253414		3.80869e+06
FALSE		High	Unambiguous	KIGPKEFTSLFYSLQSWR	[R].KIGPKEFTSLFYSLQSWR.[E]	1xPhospho [E/T]; 2xGG [K5; K/S]	1xPhospho [E6; T8]; 2xGG [K1; K5; S9]	0.0011406	0.000154279	0.855	1	1	4	731324314	731324314 [209-226]	731324314 1xPhospho [E214; T216]	731324314 1xPhospho [T/E]	PREDICTED: probable calcium-binding protein CML49 [Beta vulgaris subsp. vulgaris]	731324314	2	2495.21	18
FALSE		High	Unambiguous	MAQKDEVMIEGLKFEQK	[-].MAQKDEVMIEGLKFEQK.[H]	1xMet-loss+Acetyl [N-Term]	1xMet-loss+Acetyl [N-Term]	5.53179e-07	5.33751e-05	2.505	1	1	18	731366487	731366487 [1-17]	731366487 1xMet-loss+Acetyl [N-Term]	731366487 1xMet-loss+Acetyl [N-Term]	PREDICTED: uricase-2 isozyme 2 [Beta vulgaris subsp. vulgaris]	731366487	2	1934.99	17	127.1	176.1	29.3	30.7	145	61.8	73.3	174.4	105.6	76.5	6.54348e+06	1.84261e+07	1.89759e+06	1.6335e+06	2.95724e+06	5.3236e+06	3.23664e+06	1.08454e+07	8.05644e+06	5619364	1.32981e+07	1.84261e+07	3.0689e+06	3.21198e+06	1.51714e+07		6.46613e+06
FALSE		High	Unambiguous	MAQKDEVMIEGLK	[-].MAQKDEVMIEGLK.[F]	1xMet-loss+Acetyl [N-Term]	1xMet-loss+Acetyl [N-Term]	2.13864e-05	5.33751e-05	1.716	1	1	2	731366487	731366487 [1-13]	731366487 1xMet-loss+Acetyl [N-Term]	731366487 1xMet-loss+Acetyl [N-Term]	PREDICTED: uricase-2 isozyme 2 [Beta vulgaris subsp. vulgaris]	731366487	1	1402.72	13	45.3	146.5	43.6	75		213.5	184.7		133.2	158.2	144709	951549	174924	247683		1.14145e+06	506200		630774	721289	294087	951549	282898	487023			1.38642e+06
FALSE		High	Unambiguous	MASATVSAFEVGSYFITQYYK	[-].MASATVSAFEVGSYFITQYYK.[V]	1xMet-loss+Acetyl [N-Term]	1xMet-loss+Acetyl [N-Term]	8.41893e-08	5.33751e-05	2.91	1	1	21	731347220	731347220 [1-21]	731347220 1xMet-loss+Acetyl [N-Term]	731347220 1xMet-loss+Acetyl [N-Term]	PREDICTED: ras GTPase-activating protein-binding protein 2 [Beta vulgaris subsp. vulgaris]	731347220	0	2274.1	21	24.8	67.3	138.7	149.2	55.9	120.3	128.3	198	49.4	68.3	1.16959e+06	6.45951e+06	8.23289e+06	7.28184e+06	1.04492e+06	9.50786e+06	5.1956e+06	1.12941e+07	3.45376e+06	4.60011e+06	2.37691e+06	6.45951e+06	1.33147e+07	1.43184e+07	5.36072e+06		1.15484e+07
FALSE		High	Unambiguous	MASSQAPARKEEAAIHALIK	[-].MASSQAPARKEEAAIHALIK.[Q]	1xMet-loss+Acetyl [N-Term]	1xMet-loss+Acetyl [N-Term]	2.72362e-05	5.33751e-05	1.663	1	1	9	731316634	731316634 [1-20]	731316634 1xMet-loss+Acetyl [N-Term]	731316634 1xMet-loss+Acetyl [N-Term]	PREDICTED: uncharacterized protein LOC104908856 [Beta vulgaris subsp. vulgaris]	731316634	2	2033.11	20	220.8		230.9	64	373.3	6.6	14.5	10.9	23.4	55.6	7.09484e+06		9322672	2.12473e+06	4.75083e+06	353847	400764	423791	1.11451e+06	2.54758e+06	1.44186e+07		1.50772e+07	4.17789e+06	2.4373e+07		429788
FALSE		High	Unambiguous	MASGDVWHMEK	[-].MASGDVWHMEK.[R]	1xMet-loss+Acetyl [N-Term]	1xMet-loss+Acetyl [N-Term]	3.68873e-05	5.33751e-05	1.596	1	1	14	731313530	731313530 [1-11]	731313530 1xMet-loss+Acetyl [N-Term]	731313530 1xMet-loss+Acetyl [N-Term]	PREDICTED: glucose-6-phosphate 1-dehydrogenase, cytoplasmic [Beta vulgaris subsp. vulgaris]	731313530	0	1201.53	11	36.3	124.6		98.9	48	113.1	148.1	134.5	162.8	133.8	969710	6.76561e+06		2.72983e+06	507616	5054577	3.39326e+06	4.34245e+06	6.44558e+06	5.09839e+06	1.9707e+06	6.76561e+06		5.36772e+06	2.60421e+06		6.13937e+06
FALSE		High	Unambiguous	MASGSSSSEMASHIVGYPR	[-].MASGSSSSEMASHIVGYPR.[M]	1xMet-loss+Acetyl [N-Term]	1xMet-loss+Acetyl [N-Term]	2.41029e-11	5.33751e-05	4.665	1	1	172	1108923008	1108923008 [1-19]	1108923008 1xMet-loss+Acetyl [N-Term]	1108923008 1xMet-loss+Acetyl [N-Term]	PREDICTED: 5-methyltetrahydropteroyltriglutamate--homocysteine methyltransferase [Beta vulgaris subsp. vulgaris]	1108923008	0	1864.85	19	188.7	139.9	26.1	45.1	78.3	60.8	95.3	151.3	98	116.5	1.05812e+08	1.59397e+08	1.83746e+07	2.61613e+07	1.73992e+07	5.70021e+07	4.58243e+07	1.02462e+08	8.1452e+07	9.32175e+07	2.15038e+08	1.59397e+08	2.97164e+07	5.14413e+07	8.92624e+07		6.92356e+07
FALSE		High	Unambiguous	MASSAREESVYMAK	[-].MASSAREESVYMAK.[L]	1xMet-loss+Acetyl [N-Term]	1xMet-loss+Acetyl [N-Term]	1.58425e-07	5.33751e-05	2.774	1	1	40	731312715	731312715 [1-14]	731312715 1xMet-loss+Acetyl [N-Term]	731312715 1xMet-loss+Acetyl [N-Term]	PREDICTED: 14-3-3-like protein [Beta vulgaris subsp. vulgaris]	731312715	1	1470.69	14	134.1	112.9	13.7	52.1	47.4	83.1	167.4	123.7	135.6	129.9	7.78363e+07	1.33183e+08	1.00033e+07	3.1274e+07	1.0899e+07	8.0753e+07	8.33562e+07	8.67695e+07	1.16674e+08	1.0753e+08	1.58184e+08	1.33183e+08	1.6178e+07	6.14946e+07	5.59148e+07		9.80839e+07
FALSE		High	Unambiguous	MASSAAAMKELQHELENKANDLR	[-].MASSAAAMKELQHELENKANDLR.[K]	1xMet-loss+Acetyl [N-Term]	1xMet-loss+Acetyl [N-Term]	4.65776e-07	5.33751e-05	2.542	1	1	2	731370748	731370748 [1-23]	731370748 1xMet-loss+Acetyl [N-Term]	731370748 1xMet-loss+Acetyl [N-Term]	PREDICTED: prefoldin subunit 6 [Beta vulgaris subsp. vulgaris]	731370748	2	2468.22	23	421.3		16.3	418.5		126.1	17.8				1.88027e+06		91357.7	1.93017e+06		941308	68115.9				3.82121e+06		147749	3.79532e+06			1.14333e+06
FALSE		High	Unambiguous	MASQPMNNARPPTVQIR	[R].MASQPMNNARPPTVQIR.[G]			5.02187e-05	5.33751e-05	1.527	1	1	9	731360831	731360831 [173-189]			PREDICTED: ras-related protein RABD2a [Beta vulgaris subsp. vulgaris]	731360831	0	1910.97	17	126.4	54.6	13.2	105	151.9	44	144.7	116.8	145.1	98.3	4.07573e+06	3.57659e+06	535284	3.49864e+06	1.93925e+06	2.37319e+06	3.9997e+06	4.54794e+06	6.93021e+06	4.51804e+06	8.28296e+06	3.57659e+06	865693	6.87944e+06	9.94886e+06		2.88251e+06
FALSE		High	Unambiguous	MASPSQASLLLQK	[-].MASPSQASLLLQK.[Q]	1xMet-loss+Acetyl [N-Term]	1xMet-loss+Acetyl [N-Term]	0.000102516	5.33751e-05	1.361	1	1	12	731349052	731349052 [1-13]	731349052 1xMet-loss+Acetyl [N-Term]	731349052 1xMet-loss+Acetyl [N-Term]	PREDICTED: ubiquitin-conjugating enzyme E2 7 [Beta vulgaris subsp. vulgaris]	731349052	0	1284.72	13	252.6	6.2		41.3	30.2	114.9	132.9	120.6	170.4	131.1	5.71093e+06	283575		966060	270289	4.34625e+06	2.57707e+06	3.29345e+06	5.70742e+06	4.22787e+06	1.16061e+07	283575		1.89958e+06	1.38665e+06		5.27902e+06
FALSE		High	Unambiguous	MASPDMAGAPPPQSVDPEGIDGVR	[-].MASPDMAGAPPPQSVDPEGIDGVR.[M]	1xMet-loss+Acetyl [N-Term]	1xMet-loss+Acetyl [N-Term]	0.000106379	5.33751e-05	1.352	1	1	1	731344801	731344801 [1-24]	731344801 1xMet-loss+Acetyl [N-Term]	731344801 1xMet-loss+Acetyl [N-Term]	PREDICTED: protein transport protein SEC23 [Beta vulgaris subsp. vulgaris]	731344801	0	2305.08	24		1000										1.61396e+06										1.61396e+06
FALSE		High	Unambiguous	MASPANVVGFVGFDDMSLELAASLVR	[-].MASPANVVGFVGFDDMSLELAASLVR.[S]	1xMet-loss+Acetyl [N-Term]	1xMet-loss+Acetyl [N-Term]	1.02163e-06	5.33751e-05	2.373	1	1	1	731364401	731364401 [1-26]	731364401 1xMet-loss+Acetyl [N-Term]	731364401 1xMet-loss+Acetyl [N-Term]	PREDICTED: uncharacterized protein LOC104906826 [Beta vulgaris subsp. vulgaris]	731364401	0	2607.31	26	792.3						62.9	83.6	26.8	34.5	2.8829e+06						196300	367383	144520	178856	5.85881e+06
FALSE		High	Unambiguous	MASNSPNDVPAGAQEPK	[-].MASNSPNDVPAGAQEPK.[S]	1xMet-loss+Acetyl [N-Term]	1xMet-loss+Acetyl [N-Term]	5.90764e-06	5.33751e-05	1.995	1	1	7	731350661	731350661 [1-17]	731350661 1xMet-loss+Acetyl [N-Term]	731350661 1xMet-loss+Acetyl [N-Term]	PREDICTED: ankyrin repeat domain-containing protein 2B [Beta vulgaris subsp. vulgaris]	731350661	0	1623.76	17	167.5	192.1	3.4			122	86.8	110	112.9	205.3	3.72804e+06	8687214	95595.8			4542531	1.65727e+06	2.95863e+06	3.72323e+06	6.51778e+06	7.57635e+06	8687214	154603				5.51743e+06
FALSE		High	Unambiguous	GRLNRLPSACVGDMVMATVK	[K].GRLNRLPSACVGDMVMATVK.[K]	1xCarbamidomethyl [C10]; 1xPhospho [R5]; 1xGG [S8]	1xCarbamidomethyl [C10]; 1xPhospho [R5]; 1xGG [S8]	0.0014752	0.000154279	0.818	1	1	1	731320688	731320688 [47-66]	731320688 1xPhospho [R51]	731320688 1xPhospho [R51]	PREDICTED: 60S ribosomal protein L23 [Beta vulgaris subsp. vulgaris]	731320688	2	2369.13	20
FALSE		High	Unambiguous	MASGDVWHMEKR	[-].MASGDVWHMEKR.[S]	1xMet-loss+Acetyl [N-Term]	1xMet-loss+Acetyl [N-Term]	4.41141e-06	5.33751e-05	2.058	1	1	25	731313530	731313530 [1-12]	731313530 1xMet-loss+Acetyl [N-Term]	731313530 1xMet-loss+Acetyl [N-Term]	PREDICTED: glucose-6-phosphate 1-dehydrogenase, cytoplasmic [Beta vulgaris subsp. vulgaris]	731313530	1	1357.63	12	276.1	76	107.9	161.7	140.2	16.1	43.5	87.2	44.3	47	4.82384e+07	2.69943e+07	2.3687e+07	2.92103e+07	9.7046e+06	4.71356e+06	6.51623e+06	1.84007e+07	1.14643e+07	1.17208e+07	9.80331e+07	2.69943e+07	3.83081e+07	5.74367e+07	4.97872e+07		5.72517e+06
FALSE		High	Unambiguous	MASLSVPAALPDVAEDVEQLHK	[-].MASLSVPAALPDVAEDVEQLHK.[A]	1xMet-loss+Acetyl [N-Term]	1xMet-loss+Acetyl [N-Term]	4.24427e-07	5.33751e-05	2.562	1	1	35	731338882	731338882 [1-22]	731338882 1xMet-loss+Acetyl [N-Term]	731338882 1xMet-loss+Acetyl [N-Term]	PREDICTED: annexin D2 [Beta vulgaris subsp. vulgaris]	731338882	0	2231.16	22	158.9	296.7		79.9	40.7	22.8	53.6	135.4	120	92	3.49295e+07	1.32571e+08		1.81615e+07	3.54647e+06	8.39619e+06	1.01035e+07	3.59545e+07	3.90864e+07	2.88477e+07	7.09858e+07	1.32571e+08		3.57112e+07	1.81943e+07		1.01981e+07
FALSE		High	Unambiguous	MASILEPSKSTFFPAMTK	[R].MASILEPSKSTFFPAMTK.[I]			9.81477e-08	5.33751e-05	2.877	1	2	48	731345443	731345443 [14-31]			PREDICTED: pyruvate kinase 1, cytosolic isoform X2 [Beta vulgaris subsp. vulgaris]	731345443; 1108951830	1	1986.01	18	464.2	113.2	14.4	111.6	92.4	19.9	47.6	33.7	67.2	35.7	6.36324e+07	3.15422e+07	2.48824e+06	1.58175e+07	5.01545e+06	4.56697e+06	5.59876e+06	5.57656e+06	1.36513e+07	6.98399e+06	1.29318e+08	3.15422e+07	4.02412e+06	3.11022e+07	2.57306e+07		5.54712e+06
FALSE		High	Unambiguous	MASLFKDLNKLSAYR	[-].MASLFKDLNKLSAYR.[D]	1xMet-loss+Acetyl [N-Term]	1xMet-loss+Acetyl [N-Term]	3.28033e-05	5.33751e-05	1.622	1	2	1	731314786	731314786 [1-15]	731314786 1xMet-loss+Acetyl [N-Term]	731314786 1xMet-loss+Acetyl [N-Term]	PREDICTED: nuclear cap-binding protein subunit 2 [Beta vulgaris subsp. vulgaris]	731364591; 731314786	2	1667.91	15	559.6			49.8	73.8	89.5				227.3	669868			61561.8	35016.8	179288				388165	1.36135e+06			121050	179646		217766
FALSE		High	Unambiguous	MASLENLTREQYLYLAK	[-].MASLENLTREQYLYLAK.[L]	1xMet-loss+Acetyl [N-Term]	1xMet-loss+Acetyl [N-Term]	5.46386e-08	5.33751e-05	3.003	1	1	24	731339792	731339792 [1-17]	731339792 1xMet-loss+Acetyl [N-Term]	731339792 1xMet-loss+Acetyl [N-Term]	PREDICTED: 14-3-3-like protein GF14 kappa [Beta vulgaris subsp. vulgaris]	731339792	1	1954.03	17	323.3	194.3	0.2	87.1	102.7	7.4	26.1	132.9	61.7	64.4	2.96602e+07	3.62265e+07	23910.8	8.25477e+06	3.73289e+06	1.13882e+06	2.05024e+06	1.47294e+07	8.3918e+06	8.42533e+06	6.02773e+07	3.62265e+07	38669.9	1.62315e+07	1.91507e+07		1.38323e+06
FALSE		High	Unambiguous	MASIEITEAATMEDMELETLKPSSNTDVATKR	[-].MASIEITEAATMEDMELETLKPSSNTDVATKR.[E]	1xMet-loss+Acetyl [N-Term]	1xMet-loss+Acetyl [N-Term]	5.60946e-07	5.33751e-05	2.502	1	2	9	731335019	731335019 [1-32]	731335019 1xMet-loss+Acetyl [N-Term]	731335019 1xMet-loss+Acetyl [N-Term]	PREDICTED: protein DCL, chloroplastic isoform X1 [Beta vulgaris subsp. vulgaris]	731335019; 1108925237	1	3423.65	32	367.2	193.2		144.7				219	75.9		4.33865e+06	4639542		1.7669e+06				3.12561e+06	1.32887e+06		8.81727e+06	4639542		3.47429e+06
FALSE		High	Unambiguous	MASHLPATTDSLAMALEANSAAESISILQR	[-].MASHLPATTDSLAMALEANSAAESISILQR.[V]	1xMet-loss+Acetyl [N-Term]	1xMet-loss+Acetyl [N-Term]	4.60725e-09	5.33751e-05	3.535	1	1	9	731355173	731355173 [1-30]	731355173 1xMet-loss+Acetyl [N-Term]	731355173 1xMet-loss+Acetyl [N-Term]	PREDICTED: 26S proteasome non-ATPase regulatory subunit 11 homolog [Beta vulgaris subsp. vulgaris]	731355173	0	3010.51	30	283.2	149.8		57.5	15.8	139.6	55.8	183.6	57.8	57	6.37528e+06	6.85429e+06		1.33831e+06	140657	5.25742e+06	1.07678e+06	4.99419e+06	1.92786e+06	1.83046e+06	1.29562e+07	6.85429e+06		2.63154e+06	721608		6.38575e+06
FALSE		High	Unambiguous	MASGWGISGNKGR	[-].MASGWGISGNKGR.[C]	1xMet-loss+Acetyl [N-Term]	1xMet-loss+Acetyl [N-Term]	1.35122e-05	5.33751e-05	1.816	1	1	4	731322890	731322890 [1-13]	731322890 1xMet-loss+Acetyl [N-Term]	731322890 1xMet-loss+Acetyl [N-Term]	PREDICTED: NADH dehydrogenase [ubiquinone] iron-sulfur protein 5-B [Beta vulgaris subsp. vulgaris]	731322890	1	1231.62	13	336.1	11.8	17.3	26.7	3.4	2.9	168.5	183	187.1	63.2	7.47508e+06	535440	482179	613513	29695.5	106314	3.21432e+06	4.91663e+06	6.16578e+06	2.00451e+06	1.51913e+07	535440	779808	1.20636e+06	152346		129130
FALSE		High	Unambiguous	MASGWGISGNK	[-].MASGWGISGNK.[G]	1xMet-loss+Acetyl [N-Term]	1xMet-loss+Acetyl [N-Term]	5.91213e-05	5.33751e-05	1.49	1	1	6	731322890	731322890 [1-11]	731322890 1xMet-loss+Acetyl [N-Term]	731322890 1xMet-loss+Acetyl [N-Term]	PREDICTED: NADH dehydrogenase [ubiquinone] iron-sulfur protein 5-B [Beta vulgaris subsp. vulgaris]	731322890	0	1018.5	11	6.7			22.8	31.9	255.6	89	241.9	124	228.1	74781.5			263642	141360	4.78325e+06	853283	3.26903e+06	2.05465e+06	3.63907e+06	151976			518404	725213		5.80981e+06
FALSE		High	Unambiguous	MASGSSSSEMASHIVGYPR	[-].MASGSSSSEMASHIVGYPR.[M]	1xOxidation [M10]; 1xMet-loss+Acetyl [N-Term]	1xOxidation [M10]; 1xMet-loss+Acetyl [N-Term]	4.67946e-07	5.33751e-05	2.541	1	1	22	1108923008	1108923008 [1-19]	1108923008 1xMet-loss+Acetyl [N-Term]	1108923008 1xMet-loss+Acetyl [N-Term]	PREDICTED: 5-methyltetrahydropteroyltriglutamate--homocysteine methyltransferase [Beta vulgaris subsp. vulgaris]	1108923008	0	1880.84	19	121.1	52.5		4.1	14.4	89	56.5	31.3	38.5	592.5	2.39107e+06	2.10719e+06		83352.2	112774	2.93792e+06	956420	747164	1.12545e+06	1.66808e+07	4.85928e+06	2.10719e+06		163897	578560		3.56845e+06
FALSE		High	Unambiguous	MASISALTAAAR	[-].MASISALTAAAR.[R]	1xMet-loss+Acetyl [N-Term]	1xMet-loss+Acetyl [N-Term]	3.52617e-05	5.33751e-05	1.606	1	1	2	731360204	731360204 [1-12]	731360204 1xMet-loss+Acetyl [N-Term]	731360204 1xMet-loss+Acetyl [N-Term]	PREDICTED: secoisolariciresinol dehydrogenase [Beta vulgaris subsp. vulgaris]	731360204	0	1073.59	12		570.3	16.2	62	33.5		22.4	178.2	117.3			3.78133e+06	66379.9	208971	43355		62699.8	702423	566958			3.78133e+06	107353	410904	222422
FALSE		High	Unambiguous	MATVDPELKEEEHAPAEEEDTGAQIAPIVR	[-].MATVDPELKEEEHAPAEEEDTGAQIAPIVR.[L]	1xMet-loss+Acetyl [N-Term]	1xMet-loss+Acetyl [N-Term]	1.34805e-11	5.33751e-05	4.79	1	1	46	731355927	731355927 [1-30]	731355927 1xMet-loss+Acetyl [N-Term]	731355927 1xMet-loss+Acetyl [N-Term]	PREDICTED: ran-binding protein 1 homolog a [Beta vulgaris subsp. vulgaris]	731355927	1	3186.54	30	155.5	279.9	4.6	74.3	72.4	114.9	59.7	39.7	113.3	85.9	3.35237e+07	1.22638e+08	1.24361e+06	1.65501e+07	6.18389e+06	41437679	1.10428e+07	1.03402e+07	3.61904e+07	2.64098e+07	6.81289e+07	1.22638e+08	2.01124e+06	3.25427e+07	3.1725e+07		5.03309e+07
FALSE		High	Unambiguous	MATVEVVSAQNALQEER	[-].MATVEVVSAQNALQEER.[R]	1xMet-loss+Acetyl [N-Term]	1xMet-loss+Acetyl [N-Term]	4.35085e-08	5.33751e-05	3.052	1	1	14	731355109	731355109 [1-17]	731355109 1xMet-loss+Acetyl [N-Term]	731355109 1xMet-loss+Acetyl [N-Term]	PREDICTED: induced stolen tip protein TUB8 [Beta vulgaris subsp. vulgaris]	731355109	0	1785.9	17	266.6	265.2	7.3	20.7	79.3	53.8	38.4	128.1	55.5	85	8.79845e+06	1.77812e+07	303277	705620	1.03683e+06	2.96949e+06	1.08629e+06	5.1079e+06	2.71352e+06	4.00229e+06	1.78808e+07	1.77812e+07	490478	1.38747e+06	5.31923e+06		3.6068e+06
FALSE		High	Unambiguous	MATVPGALIWEIVK	[-].MATVPGALIWEIVK.[K]	1xMet-loss+Acetyl [N-Term]	1xMet-loss+Acetyl [N-Term]	3.78524e-06	5.33751e-05	2.091	1	1	41	731357196	731357196 [1-14]	731357196 1xMet-loss+Acetyl [N-Term]	731357196 1xMet-loss+Acetyl [N-Term]	PREDICTED: 60S ribosomal protein L28-1 [Beta vulgaris subsp. vulgaris]	731357196	0	1438.83	14	54.1	100.4	235.4	113.5	155.4	141.7	30.4	59.3	84.7	25	2.74731e+07	103520503	150135250	5.95197e+07	3.12405e+07	1.20334e+08	1.32488e+07	3.63555e+07	6.36865e+07	1.81245e+07	5.58326e+07	103520503	2.42808e+08	1.17035e+08	1.60272e+08		1.4616e+08
FALSE		High	Unambiguous	MDMGSDFDRLLFFEHARK	[-].MDMGSDFDRLLFFEHARK.[S]	1xAcetyl [N-Term]	1xAcetyl [N-Term]	8.0045e-05	5.33751e-05	1.42	1	1	5	731338086	731338086 [1-18]	731338086 1xAcetyl [N-Term]	731338086 1xAcetyl [N-Term]	PREDICTED: mitochondrial import receptor subunit TOM20 [Beta vulgaris subsp. vulgaris]	731338086	2	2257.05	18	492.2		20.2	63.9	29.3		101.3	119.7	173.4		5.13256e+06		264908	688231	120876		905824	1.50797e+06	2.67889e+06		1.04307e+07		428425	1.35328e+06	620129
FALSE		High	Unambiguous	MDMGSDFDRLLFFEHAR	[-].MDMGSDFDRLLFFEHAR.[K]	1xAcetyl [N-Term]; 1xOxidation [M3]	1xAcetyl [N-Term]; 1xOxidation [M3]	3.35532e-05	5.33751e-05	1.617	1	1	11	731338086	731338086 [1-17]	731338086 1xAcetyl [N-Term]	731338086 1xAcetyl [N-Term]	PREDICTED: mitochondrial import receptor subunit TOM20 [Beta vulgaris subsp. vulgaris]	731338086	1	2144.95	17	20.6	41.3	100.5	74.1	298.2	18.7	98.2	36.7	43.2	268.5	587813	2.3929e+06	3.59888e+06	2.18186e+06	3.36713e+06	891155	2.40066e+06	1.26397e+06	1.82302e+06	10916624	1.19459e+06	2.3929e+06	5.82031e+06	4.29023e+06	1.72743e+07		1.08241e+06
FALSE		High	Unambiguous	MDMGSDFDRLLFFEHAR	[-].MDMGSDFDRLLFFEHAR.[K]	1xAcetyl [N-Term]	1xAcetyl [N-Term]	2.28723e-07	5.33751e-05	2.695	1	1	81	731338086	731338086 [1-17]	731338086 1xAcetyl [N-Term]	731338086 1xAcetyl [N-Term]	PREDICTED: mitochondrial import receptor subunit TOM20 [Beta vulgaris subsp. vulgaris]	731338086	1	2128.96	17	112	66.1	133.6	164.1	146	18.9	143.4	65.9	123.9	26.1	3.22482e+07	3.86787e+07	4.83362e+07	4.88196e+07	1.66474e+07	9.10546e+06	3.53941e+07	2.29136e+07	5.2842e+07	1.07074e+07	6.55369e+07	3.86787e+07	7.81722e+07	9.59947e+07	8.54057e+07		1.10596e+07
FALSE		High	Unambiguous	MDISESKDTYLFR	[K].MDISESKDTYLFR.[V]			3.52617e-05	5.33751e-05	1.606	1	1	2	731327924	731327924 [94-106]			PREDICTED: alpha-crystallin domain-containing protein 22.3 [Beta vulgaris subsp. vulgaris]	731327924	1	1604.76	13	67.8		201.2	726.8				4.2			98024		365686	1086335				7298.88			199211		591409	2.13608e+06
FALSE		High	Unambiguous	MDLQLTAEEMEER	[R].MDLQLTAEEMEER.[K]			3.52617e-05	5.33751e-05	1.606	1	1	9	1108913955	1108913955 [567-579]			PREDICTED: dihydroxy-acid dehydratase, chloroplastic [Beta vulgaris subsp. vulgaris]	1108913955	0	1594.71	13	223.5	107.7	43.3	110	94	52.5	39.7	166.8	93.1	69.4	3.43364e+06	3.3645e+06	837037	1.74686e+06	571991	1.35063e+06	522983	3095639	2.11997e+06	1.52045e+06	6.97806e+06	3.3645e+06	1.35371e+06	3.43487e+06	2.93446e+06		1.64049e+06
FALSE		High	Unambiguous	MDINADSFISDKSAK	[-].MDINADSFISDKSAK.[I]	1xAcetyl [N-Term]	1xAcetyl [N-Term]	4.15327e-06	5.33751e-05	2.071	1	1	2	1108967185	1108967185 [1-15]	1108967185 1xAcetyl [N-Term]	1108967185 1xAcetyl [N-Term]	PREDICTED: putative GDP-L-fucose synthase 2 [Beta vulgaris subsp. vulgaris]	1108967185	1	1683.79	15	974.9		25.1								1.35482e+06		43800.8								2.75336e+06		70837.2
FALSE		High	Unambiguous	MDILFAQIQADLR	[-].MDILFAQIQADLR.[S]	1xAcetyl [N-Term]	1xAcetyl [N-Term]	1.50939e-06	5.33751e-05	2.289	1	1	18	731341211	731341211 [1-13]	731341211 1xAcetyl [N-Term]	731341211 1xAcetyl [N-Term]	PREDICTED: protein TPLATE [Beta vulgaris subsp. vulgaris]	731341211	0	1575.82	13	145.5	30.6	161.7	95.4	105.2	57.6	85.6	256.6	31	30.8	6.79967e+06	2.9101e+06	9.4994e+06	4609152	1.9486e+06	4.50716e+06	3.42927e+06	1.44882e+07	2.14461e+06	2052942	1.38187e+07	2.9101e+06	1.5363e+07	9.06305e+06	9.99685e+06		5.47447e+06
FALSE		High	Unambiguous	MDIEDLLHHR	[K].MDIEDLLHHR.[T]			2.45273e-05	5.33751e-05	1.686	1	1	9	731344518	731344518 [380-389]			PREDICTED: acetyl-coenzyme A carboxylase carboxyl transferase subunit alpha, chloroplastic [Beta vulgaris subsp. vulgaris]	731344518	0	1278.63	10	122.5	69.6	27.1	118.2	149.1	345.1	40.2	31.9	30.9	65.4	2.13773e+06	2.46829e+06	593650	2.1319e+06	1.03044e+06	1.00732e+07	601764	672278	799004	1.62669e+06	4.34444e+06	2.46829e+06	960086	4.19199e+06	5.28642e+06		1.22351e+07
FALSE		High	Unambiguous	MDNAGCSTQLIDGDGTFNVAGIESFLKEVK	[-].MDNAGCSTQLIDGDGTFNVAGIESFLKEVK.[L]	1xAcetyl [N-Term]; 1xCarbamidomethyl [C6]	1xAcetyl [N-Term]; 1xCarbamidomethyl [C6]	2.40838e-05	5.33751e-05	1.69	1	1	1	731328528	731328528 [1-30]	731328528 1xAcetyl [N-Term]	731328528 1xAcetyl [N-Term]	PREDICTED: protein ROOT HAIR DEFECTIVE 3-like [Beta vulgaris subsp. vulgaris]	731328528	1	3258.53	30		1000										815844										815844
FALSE		High	Unambiguous	MDLDKWIAK	[-].MDLDKWIAK.[V]	1xAcetyl [N-Term]	1xAcetyl [N-Term]	9.91847e-05	5.33751e-05	1.369	1	1	18	731354470	731354470 [1-9]	731354470 1xAcetyl [N-Term]	731354470 1xAcetyl [N-Term]	PREDICTED: phytochrome-associated serine/threonine-protein phosphatase [Beta vulgaris subsp. vulgaris]	731354470	1	1161.6	9	137.1	147.6	64.8	187.8	68.4	85	50.5	89.9	100.1	68.8	5.56177e+06	1.2174e+07	3.30476e+06	7.87485e+06	1.09921e+06	5.77231e+06	1.75827e+06	4.40609e+06	6.01556e+06	3.97921e+06	1.1303e+07	1.2174e+07	5.34466e+06	1.54844e+07	5.63926e+06		7.01114e+06
FALSE		High	Unambiguous	MDKSTVHDVVLVGGSTRIPK	[K].MDKSTVHDVVLVGGSTRIPK.[V]			3.53073e-06	5.33751e-05	2.106	1	1	3	731318762	731318762 [1207-1226]			PREDICTED: LOW QUALITY PROTEIN: uncharacterized protein LOC104887018 [Beta vulgaris subsp. vulgaris]	731318762	2	2139.16	20	998.1				1.9						1.38413e+07				10566						2.81292e+07				54206.5
FALSE		High	Unambiguous	MDKSTVHDVVLVGGSTR	[K].MDKSTVHDVVLVGGSTR.[I]	1xOxidation [M1]	1xOxidation [M1]	6.06961e-05	5.33751e-05	1.484	1	1	7	731318762	731318762 [1207-1223]			PREDICTED: LOW QUALITY PROTEIN: uncharacterized protein LOC104887018 [Beta vulgaris subsp. vulgaris]	731318762	1	1816.92	17	83.6		26.5	10.8	32.1	59.3	77.7	26.6	28.2	655.1	980617		390837	130811	149106	1.16317e+06	781896	376845	489988	1.09585e+07	1.99287e+06		632084	257216	764954		1.4128e+06
FALSE		High	Unambiguous	MDKSTVHDVVLVGGSTR	[K].MDKSTVHDVVLVGGSTR.[I]			6.6209e-09	5.33751e-05	3.457	1	1	71	731318762	731318762 [1207-1223]			PREDICTED: LOW QUALITY PROTEIN: uncharacterized protein LOC104887018 [Beta vulgaris subsp. vulgaris]	731318762	1	1800.93	17	98	149.1	142.9	124.3	149.9	52.7	70.4	60.6	70.4	81.7	6.61188e+07	2.04396e+08	1.2112e+08	8.66301e+07	4.00642e+07	5.94876e+07	4.07455e+07	4.93648e+07	7.03751e+07	7.86321e+07	1.34371e+08	2.04396e+08	1.95882e+08	1.70342e+08	2.0554e+08		7.22546e+07
FALSE		High	Unambiguous	MDKSLDMSLDDIIK	[-].MDKSLDMSLDDIIK.[S]	1xAcetyl [N-Term]	1xAcetyl [N-Term]	2.53226e-05	5.33751e-05	1.679	1	1	7	731367879	731367879 [1-14]	731367879 1xAcetyl [N-Term]	731367879 1xAcetyl [N-Term]	PREDICTED: THO complex subunit 4D [Beta vulgaris subsp. vulgaris]	731367879	1	1665.81	14	246.4	320.5	12.2	136.5	83.4	14.9		68.3	73.1	44.8	4.68786e+06	12392054	290932	2.6843e+06	628938	475300		1.56952e+06	2.06036e+06	1.2156e+06	9.52697e+06	12392054	470512	5.27817e+06	3.22662e+06		577307
FALSE		High	Unambiguous	MDKNSVHDVVLVGGSTR	[K].MDKNSVHDVVLVGGSTR.[I]			1.06377e-08	5.33751e-05	3.355	1	1	47	731349044	731349044 [332-348]			PREDICTED: heat shock cognate 70 kDa protein 2 [Beta vulgaris subsp. vulgaris]	731349044	1	1813.92	17	158.1	186.7	101.7	165.2	145.2	37.3	52.9	49.9	45.2	58	4.47704e+07	1.07421e+08	3.61788e+07	4.83539e+07	1.62915e+07	1.76532e+07	1.28449e+07	1.70556e+07	1.89544e+07	2.34142e+07	9.09852e+07	1.07421e+08	5.85105e+07	9.5079e+07	8.35796e+07		2.14418e+07
FALSE		High	Unambiguous	MDKNMLGDLDNLPEEDKMK	[-].MDKNMLGDLDNLPEEDKMK.[M]	1xAcetyl [N-Term]	1xAcetyl [N-Term]	4.31029e-06	5.33751e-05	2.063	1	1	16	731334059	731334059 [1-19]	731334059 1xAcetyl [N-Term]	731334059 1xAcetyl [N-Term]	PREDICTED: mitochondrial import inner membrane translocase subunit Tim9 [Beta vulgaris subsp. vulgaris]	731334059	2	2278.04	19	235.6	128.2		163.1	155.1	24.7	56.4	77	90.3	69.6	1.55381e+07	17175114		1.11127e+07	4.05199e+06	2.72563e+06	3.19125e+06	6133400	8.81746e+06	6.54695e+06	3.15775e+07	17175114		2.1851e+07	2.07878e+07		3.31059e+06
FALSE		High	Unambiguous	MDHLDWVEGETK	[-].MDHLDWVEGETK.[L]	1xAcetyl [N-Term]	1xAcetyl [N-Term]	8.28161e-05	5.33751e-05	1.412	1	1	1	731363438	731363438 [1-12]	731363438 1xAcetyl [N-Term]	731363438 1xAcetyl [N-Term]	PREDICTED: MLP-like protein 43 [Beta vulgaris subsp. vulgaris]	731363438	0	1501.66	12			948.7				51.3						408869				15091.4						661247
FALSE		High	Unambiguous	MDGLGGSSTETPVSK	[-].MDGLGGSSTETPVSK.[K]	1xAcetyl [N-Term]	1xAcetyl [N-Term]	4.27773e-05	5.33751e-05	1.563	1	1	4	731358630	731358630 [1-15]	731358630 1xAcetyl [N-Term]	731358630 1xAcetyl [N-Term]	PREDICTED: protein RER1B [Beta vulgaris subsp. vulgaris]	731358630	0	1507.69	15		206.7		38.2	58.4	98.4	133.2	192.2	156.2	116.7		2.19286e+06		206277	120691	859176	596046	1.21154e+06	1.20792e+06	868887		2.19286e+06		405606	619176		1.04357e+06
FALSE		High	Unambiguous	MDKSTVHEVVLVGGSTR	[K].MDKSTVHEVVLVGGSTR.[I]			1.12312e-07	5.33751e-05	2.848	1	1	41	731318762	731318762 [332-348]			PREDICTED: LOW QUALITY PROTEIN: uncharacterized protein LOC104887018 [Beta vulgaris subsp. vulgaris]	731318762	1	1814.94	17	218.6	70.6	142.7	88.8	147.2	30.6	57.3	70.8	83.1	90.3	9.1268e+07	59904654	7.48734e+07	3.82962e+07	2.43481e+07	2.13431e+07	2.05076e+07	3.56839e+07	5.14004e+07	5.37746e+07	1.85481e+08	59904654	1.2109e+08	7.53024e+07	1.24912e+08		2.59237e+07
FALSE		High	Unambiguous	MDGHDSDDPKQNTTDMTVFVQNLLQQMQTR	[-].MDGHDSDDPKQNTTDMTVFVQNLLQQMQTR.[F]	1xAcetyl [N-Term]	1xAcetyl [N-Term]	4.41141e-06	5.33751e-05	2.058	1	1	7	731346539	731346539 [1-30]	731346539 1xAcetyl [N-Term]	731346539 1xAcetyl [N-Term]	PREDICTED: heat shock factor-binding protein 1 [Beta vulgaris subsp. vulgaris]	731346539	1	3535.59	30	373.7	163.7	5.7	54.1	65		92.4	121.2	99.8	24.4	10481698	9.33343e+06	201516	1.56718e+06	722585		2.22298e+06	4.10771e+06	4.14557e+06	975401	2.13016e+07	9.33343e+06	325904	3.08156e+06	3.70705e+06
FALSE		High	Unambiguous	MDNFVPTWVSTAERPWDPPLVDAGK	[R].MDNFVPTWVSTAERPWDPPLVDAGK.[S]			5.75843e-05	5.33751e-05	1.496	1	1	6	731360956	731360956 [17-41]			PREDICTED: uncharacterized protein LOC104905306 isoform X1 [Beta vulgaris subsp. vulgaris]	731360956	0	2828.37	25	57.7	54.4	318.1	174.9	4.5	199.2	91.8	41.6	51.9	6	1.48779e+06	2.85034e+06	1.03138e+07	4.66406e+06	45608.8	8.59711e+06	2.03088e+06	1.29787e+06	1.98474e+06	219419	3.02358e+06	2.85034e+06	1.66801e+07	9.17102e+06	233985		1.04422e+07
FALSE		High	Unambiguous	MDNFYTVTVYEKGAEVVR	[K].MDNFYTVTVYEKGAEVVR.[M]			2.94611e-06	5.33751e-05	2.145	1	2	1	731331070	731331070 [376-393]			PREDICTED: puromycin-sensitive aminopeptidase-like isoform X2 [Beta vulgaris subsp. vulgaris]	731331070; 731331066	1	2121.03	18	366.6	239.4		42.5	77.8		35.6	77.3	94.3	66.5	1.90166e+06	2.52395e+06		227786	159871		158580	484267	724537	492011	3.86468e+06	2.52395e+06		447899	820182
FALSE		High	Unambiguous	MDSSKGTSNEAKGVDVYTAK	[-].MDSSKGTSNEAKGVDVYTAK.[G]	1xAcetyl [N-Term]	1xAcetyl [N-Term]	2.81247e-06	5.33751e-05	2.155	1	1	5	731357771	731357771 [1-20]	731357771 1xAcetyl [N-Term]	731357771 1xAcetyl [N-Term]	PREDICTED: rhodanese-like domain-containing protein 19, mitochondrial [Beta vulgaris subsp. vulgaris]	731357771	2	2130	20	302	190.1	0.6	159.9	54.1		26.1	138.5	104	24.7	3312130	4.2374e+06	7681.86	1.81187e+06	235180		245752	1834130	1.68954e+06	385754	6.73112e+06	4.2374e+06	12423.6	3.5627e+06	1.20653e+06
FALSE		High	Unambiguous	MDSPQSVVSPFK	[-].MDSPQSVVSPFK.[N]	1xAcetyl [N-Term]	1xAcetyl [N-Term]	2.6745e-05	5.33751e-05	1.667	1	1	5	731329951	731329951 [1-12]	731329951 1xAcetyl [N-Term]	731329951 1xAcetyl [N-Term]	PREDICTED: uncharacterized protein LOC104891811 [Beta vulgaris subsp. vulgaris]	731329951	0	1363.66	12		361.8		21.9	57.3	163.3	141.7	28	168.7	57.2		4.75108e+06		146365	146722	1.76487e+06	785162	218393	1.61534e+06	527205		4.75108e+06		287801	752721		2.14364e+06
FALSE		High	Unambiguous	MDSIFANVVQAPEDPILGVTVAYNKDPSPVKLNLGVGAYR	[-].MDSIFANVVQAPEDPILGVTVAYNKDPSPVKLNLGVGAYR.[T]	1xAcetyl [N-Term]	1xAcetyl [N-Term]	3.85552e-08	5.33751e-05	3.078	1	1	5	731353768	731353768 [1-40]	731353768 1xAcetyl [N-Term]	731353768 1xAcetyl [N-Term]	PREDICTED: aspartate aminotransferase, cytoplasmic [Beta vulgaris subsp. vulgaris]	731353768	2	4300.23	40	707.9	246.2	30.7						15.2		6.55011e+06	4.62943e+06	356763						208484		1.33115e+07	4.62943e+06	576978
FALSE		High	Unambiguous	MDSIFANVVQAPEDPILGVTVAYNKDPSPVK	[-].MDSIFANVVQAPEDPILGVTVAYNKDPSPVK.[L]	1xAcetyl [N-Term]	1xAcetyl [N-Term]	1.82406e-08	5.33751e-05	3.239	1	1	18	731353768	731353768 [1-31]	731353768 1xAcetyl [N-Term]	731353768 1xAcetyl [N-Term]	PREDICTED: aspartate aminotransferase, cytoplasmic [Beta vulgaris subsp. vulgaris]	731353768	1	3356.71	31	230	333.3	125.5	7.5	54.9	37.7		109.2	80.6	21.4	1.25608e+07	37000863	8.61221e+06	424945	1.18747e+06	3.44655e+06		7.20267e+06	6.52068e+06	1.66362e+06	2.55268e+07	37000863	1.39282e+07	835576	6.09203e+06		4.18624e+06
FALSE		High	Unambiguous	MDSHVYPGYVVPPSYDSLLGK	[R].MDSHVYPGYVVPPSYDSLLGK.[L]			1.28883e-06	5.33751e-05	2.323	1	1	35	731351887	731351887 [435-455]			PREDICTED: biotin carboxylase 2, chloroplastic [Beta vulgaris subsp. vulgaris]	731351887	0	2324.13	21	248.3	127.8	33.6	100.8	29.6	87.8	121.5	95.4	89.2	66	2.16114e+07	2.26052e+07	3.67793e+06	9.06305e+06	1.01954e+06	1.2782e+07	9.06579e+06	1.0032e+07	1.1495e+07	8.19804e+06	4.39201e+07	2.26052e+07	5.94816e+06	1.78208e+07	5.23053e+06		1.55252e+07
FALSE		High	Unambiguous	MDSFGSSSTSGSSSSQPNPEAIMHQLKNQLAQAYAEEFLETVR	[-].MDSFGSSSTSGSSSSQPNPEAIMHQLKNQLAQAYAEEFLETVR.[G]	1xAcetyl [N-Term]	1xAcetyl [N-Term]	9.47155e-06	5.33751e-05	1.893	1	1	4	731331967	731331967 [1-43]	731331967 1xAcetyl [N-Term]	731331967 1xAcetyl [N-Term]	PREDICTED: mitochondrial import inner membrane translocase subunit Tim13 [Beta vulgaris subsp. vulgaris]	731331967	1	4702.17	43		1000										1.26011e+06										1.26011e+06
FALSE		High	Unambiguous	MDSDFGIPRELSDLQKQR	[-].MDSDFGIPRELSDLQKQR.[S]	1xAcetyl [N-Term]	1xAcetyl [N-Term]	3.45924e-07	5.33751e-05	2.606	1	1	30	731314194	731314194 [1-18]	731314194 1xAcetyl [N-Term]	731314194 1xAcetyl [N-Term]	PREDICTED: pyrophosphate--fructose 6-phosphate 1-phosphotransferase subunit alpha [Beta vulgaris subsp. vulgaris]	731314194	2	2177.07	18	274.4	2.2	3.8	113.8	91.7	2.6	48	325	83.3	55.2	1.64207e+07	268309	282301	7.03926e+06	2.17484e+06	259705	2.4661e+06	2.34994e+07	7.38415e+06	4.71299e+06	3.33712e+07	268309	456554	1.38414e+07	1.11575e+07		315442
FALSE		High	Unambiguous	MDSDFGIPRELSDLQK	[-].MDSDFGIPRELSDLQK.[Q]	1xAcetyl [N-Term]	1xAcetyl [N-Term]	4.93998e-09	5.33751e-05	3.52	1	1	26	731314194	731314194 [1-16]	731314194 1xAcetyl [N-Term]	731314194 1xAcetyl [N-Term]	PREDICTED: pyrophosphate--fructose 6-phosphate 1-phosphotransferase subunit alpha [Beta vulgaris subsp. vulgaris]	731314194	1	1892.91	16	451.6	181.1	1.8	115.8	38.6	4.3	19.3	86.7	77.3	23.5	2.96196e+07	2.4134e+07	144377	7.84753e+06	1.00389e+06	468812	1.08624e+06	6.86714e+06	7.51372e+06	2.19972e+06	6.01947e+07	2.4134e+07	233495	1.54307e+07	5.15022e+06		569427
FALSE		High	Unambiguous	MDNFYTVTVYEK	[K].MDNFYTVTVYEK.[G]			2.11917e-05	5.33751e-05	1.718	1	2	22	731331070	731331070 [376-387]			PREDICTED: puromycin-sensitive aminopeptidase-like isoform X2 [Beta vulgaris subsp. vulgaris]	731331070; 731331066	0	1509.69	12	94.4	152.1	32.9	72.9	42.6	93.2	97.3	225.7	91.2	97.7	4938677	1.61655e+07	2.1622e+06	3.9426e+06	882613	8.15258e+06	4.36467e+06	1.42616e+07	7.06811e+06	7.28939e+06	1.00367e+07	1.61655e+07	3.49684e+06	7.75241e+06	4.52804e+06		9.90226e+06
FALSE		High	Unambiguous	MDSDFGIPR	[-].MDSDFGIPR.[E]	1xAcetyl [N-Term]	1xAcetyl [N-Term]	6.36842e-05	5.33751e-05	1.473	1	1	29	731314194	731314194 [1-9]	731314194 1xAcetyl [N-Term]	731314194 1xAcetyl [N-Term]	PREDICTED: pyrophosphate--fructose 6-phosphate 1-phosphotransferase subunit alpha [Beta vulgaris subsp. vulgaris]	731314194	0	1079.48	9	85.3	258.3	12.5	65.4	39	72.6	135.5	119.8	135.6	76	9.63891e+06	5.93357e+07	1.78059e+06	7.63406e+06	1.74521e+06	1.37365e+07	1.31357e+07	1.63538e+07	2.26965e+07	1.22453e+07	1.95888e+07	5.93357e+07	2.87967e+06	1.5011e+07	8.95339e+06		1.66846e+07
FALSE		High	Unambiguous	MDRCFLELQVDGEEAYTTFQK	[K].MDRCFLELQVDGEEAYTTFQK.[V]	1xCarbamidomethyl [C4]	1xCarbamidomethyl [C4]	0.000105943	5.33751e-05	1.353	1	2	4	731362937	731362937 [160-180]			PREDICTED: elongation factor 2 [Beta vulgaris subsp. vulgaris]	731362937; 733214592	1	2580.17	21		280.8		174.5	73.2	230.7			240.7			3.48781e+06		1102535	177251	2.35942e+06			2.18e+06			3.48781e+06		2.16793e+06	909345		2.86579e+06
FALSE		High	Unambiguous	MDQSLLDDIIR	[-].MDQSLLDDIIR.[R]	1xAcetyl [N-Term]	1xAcetyl [N-Term]	3.7221e-05	5.33751e-05	1.594	1	1	2	731328441	731328441 [1-11]	731328441 1xAcetyl [N-Term]	731328441 1xAcetyl [N-Term]	PREDICTED: serine/threonine-protein phosphatase PP1 [Beta vulgaris subsp. vulgaris]	731328441	0	1360.68	11		274.4			49.8	211.6	82	186.4		195.8		1.59613e+06			56437.7	1013365	201385	644336		799364		1.59613e+06			289540		1.23085e+06
FALSE		High	Unambiguous	MDQANDSGLASYVAGQIDR	[K].MDQANDSGLASYVAGQIDR.[S]			5.60845e-05	5.33751e-05	1.502	1	2	1	731365529	731365529 [191-209]			PREDICTED: peroxisomal (S)-2-hydroxy-acid oxidase isoform X1 [Beta vulgaris subsp. vulgaris]	731365529; 731365533	0	2010.92	19		484.6		111.4	36.1			268.5	99.3			1986997		232351	28847.4			654468	296879			1986997		456875	147995
FALSE		High	Unambiguous	MDPTKYRPASAYNSPYLTNNNGTPVWNDNSSLTVGPR	[-].MDPTKYRPASAYNSPYLTNNNGTPVWNDNSSLTVGPR.[G]	1xAcetyl [N-Term]	1xAcetyl [N-Term]	5.60845e-05	5.33751e-05	1.502	1	1	2	731361773	731361773 [1-37]	731361773 1xAcetyl [N-Term]	731361773 1xAcetyl [N-Term]	PREDICTED: catalase [Beta vulgaris subsp. vulgaris]	731361773	1	4139.95	37	1000										3.66733e+06										7.45298e+06
FALSE		High	Unambiguous	MDPNPTNFPILSYVMSR	[-].MDPNPTNFPILSYVMSR.[L]	1xAcetyl [N-Term]	1xAcetyl [N-Term]	0.000105077	5.33751e-05	1.355	1	1	3	731335729	731335729 [1-17]	731335729 1xAcetyl [N-Term]	731335729 1xAcetyl [N-Term]	PREDICTED: plant intracellular Ras-group-related LRR protein 9 [Beta vulgaris subsp. vulgaris]	731335729	0	2023.96	17	212.3	129.4	45.4	203.6	134.4	49.1			199.4	26.5	1.8008e+06	2.23069e+06	483490	1785179	451724	696394			2.50664e+06	320826	3.6597e+06	2.23069e+06	781929	3.51023e+06	2.31746e+06		845852
FALSE		High	Unambiguous	VETGVLKPGMLVTFGPTGLTTEVK	[R].VETGVLKPGMLVTFGPTGLTTEVK.[S]	1xGG [T13]	1xGG [T13]	0.00175612	0.00019222	0.794	1	2	1	731318329	731318329 [255-278]			PREDICTED: elongation factor 1-alpha-like [Beta vulgaris subsp. vulgaris]	731318329; 731318331	0	2588.4	24
FALSE		High	Unambiguous	MDPDAVAKAFVEHYYSTFDANRPGLANLYQDSSMLTFEGQK	[-].MDPDAVAKAFVEHYYSTFDANRPGLANLYQDSSMLTFEGQK.[I]	1xAcetyl [N-Term]	1xAcetyl [N-Term]	3.72632e-07	5.33751e-05	2.59	1	1	3	731343134	731343134 [1-41]	731343134 1xAcetyl [N-Term]	731343134 1xAcetyl [N-Term]	PREDICTED: nuclear transport factor 2 [Beta vulgaris subsp. vulgaris]	731343134	1	4669.16	41
FALSE		High	Unambiguous	MDNLCCFSSVSQIVGGR	[-].MDNLCCFSSVSQIVGGR.[S]	1xAcetyl [N-Term]; 2xCarbamidomethyl [C5; C6]	1xAcetyl [N-Term]; 2xCarbamidomethyl [C5; C6]	7.09826e-05	5.33751e-05	1.448	1	1	4	731357976	731357976 [1-17]	731357976 1xAcetyl [N-Term]	731357976 1xAcetyl [N-Term]	PREDICTED: probable protein phosphatase 2C 9 [Beta vulgaris subsp. vulgaris]	731357976	0	1971.87	17		302.1				59.9	162.1	308	74.5	93.4		786468				128317	178050	476643	141463	170661		786468					155856
FALSE		High	Unambiguous	MDREWGSKPGSGGAASSQNEAIDRR	[-].MDREWGSKPGSGGAASSQNEAIDRR.[E]	1xAcetyl [N-Term]	1xAcetyl [N-Term]	4.33032e-06	5.33751e-05	2.062	1	1	6	731368751	731368751 [1-25]	731368751 1xAcetyl [N-Term]	731368751 1xAcetyl [N-Term]	PREDICTED: splicing factor 3A subunit 2 [Beta vulgaris subsp. vulgaris]	731368751	2	2704.25	25	196.7	0.2	235.1	178.9	254.4	9.3	20.7	43	27.2	34.5	4.38676e+06	6924.86	6588128	4.12277e+06	2.24714e+06	346689	396526	1.1588e+06	897230	1.09731e+06	8.91504e+06	6924.86	1.06547e+07	8.10668e+06	1.15284e+07		421094
FALSE		High	Unambiguous	MDGEELTEQETALYDR	[-].MDGEELTEQETALYDR.[Q]	1xAcetyl [N-Term]	1xAcetyl [N-Term]	1.49543e-06	5.33751e-05	2.291	1	1	4	731317974	731317974 [1-16]	731317974 1xAcetyl [N-Term]	731317974 1xAcetyl [N-Term]	PREDICTED: SUMO-activating enzyme subunit 1B-1 [Beta vulgaris subsp. vulgaris]	731317974	0	1941.84	16		531.3		50		45.6	27.8	235.9	62.3	47.1		2.98701e+06		142844		211155	66034.6	788346	255238	185749		2.98701e+06		280876			256473
FALSE		High	Unambiguous	MDGDLWDLVLTPDNEYRR	[R].MDGDLWDLVLTPDNEYRR.[Q]	1xOxidation [M1]	1xOxidation [M1]	7.58792e-07	5.33751e-05	2.437	1	1	1	731348509	731348509 [965-982]			PREDICTED: clathrin heavy chain 1 [Beta vulgaris subsp. vulgaris]	731348509	1	2224.03	18		87	98.7		73.7	70.9		91.4	61.3	517.1		841113	590133		138826	564385		525044	431770	3508284		841113	954398		712215		685511
FALSE		High	Unambiguous	MDGDLWDLVLTPDNEYRR	[R].MDGDLWDLVLTPDNEYRR.[Q]			3.74368e-07	5.33751e-05	2.589	1	1	52	731348509	731348509 [965-982]			PREDICTED: clathrin heavy chain 1 [Beta vulgaris subsp. vulgaris]	731348509	1	2208.04	18	13.8	29.5	124.4	97.7	58.6	317	142.8	42.2	93.7	80.3	1.53062e+06	6640804	1.73091e+07	1.11865e+07	2.57001e+06	5.8722e+07	1.35584e+07	5.64416e+06	1.5372e+07	1.26784e+07	3.11062e+06	6640804	2.79934e+07	2.19961e+07	1.31848e+07		7.13246e+07
FALSE		High	Unambiguous	MAYPMKPTKPGMEESQETTHK	[-].MAYPMKPTKPGMEESQETTHK.[I]	1xMet-loss+Acetyl [N-Term]	1xMet-loss+Acetyl [N-Term]	1.34501e-05	5.33751e-05	1.817	1	2	9	731322607	731322607 [1-21]	731322607 1xMet-loss+Acetyl [N-Term]	731322607 1xMet-loss+Acetyl [N-Term]	PREDICTED: 40S ribosomal protein S20-2 [Beta vulgaris subsp. vulgaris]	731377213; 731322607	0	2332.09	21	46.3	68.3	207.1	113	147.4		0.5	111.8	113.4	192.1	1.70162e+06	5.09593e+06	9.55565e+06	4.28756e+06	2.14442e+06		16359.8	4.95828e+06	6.17047e+06	1.00607e+07	3.45814e+06	5.09593e+06	1.5454e+07	8.4307e+06	1.10014e+07
FALSE		High	Unambiguous	MAYINRPYGNNYYEVEKEVVR	[-].MAYINRPYGNNYYEVEKEVVR.[E]	1xMet-loss+Acetyl [N-Term]	1xMet-loss+Acetyl [N-Term]	2.77166e-08	5.33751e-05	3.149	1	1	11	731330786	731330786 [1-21]	731330786 1xMet-loss+Acetyl [N-Term]	731330786 1xMet-loss+Acetyl [N-Term]	PREDICTED: uncharacterized protein LOC104892176 [Beta vulgaris subsp. vulgaris]	731330786	1	2518.24	21	179.2		72.2	213.7	92.8	40.3	38.2	117.3	83.6	162.8	4.84796e+06		2.45231e+06	5.97308e+06	994180	1.82349e+06	885525	3.83261e+06	3.34881e+06	6.28075e+06	9.85232e+06		3.96602e+06	1.1745e+07	5.10041e+06		2.21484e+06
FALSE		High	Unambiguous	MAYDYYASGAEDQWTLAENR	[K].MAYDYYASGAEDQWTLAENR.[N]			2.8723e-07	5.33751e-05	2.646	1	1	9	731365529	731365529 [20-39]			PREDICTED: peroxisomal (S)-2-hydroxy-acid oxidase isoform X1 [Beta vulgaris subsp. vulgaris]	731365529	0	2354	20		135.7		51.2	88.5	16.7	20.7	440.6	124.4	122.2		3.49022e+06		669966	443428	352679	224338	6.73396e+06	2.33228e+06	2.20473e+06		3.49022e+06		1.31736e+06	2.2749e+06		428370
FALSE		High	Unambiguous	MAWSATAIGALLGLGTQMYSNALRK	[-].MAWSATAIGALLGLGTQMYSNALRK.[L]	1xMet-loss [N-Term]	1xMet-loss [N-Term]	2.92138e-09	5.33751e-05	3.633	1	1	3	1108953086	1108953086 [1-25]	1108953086 1xMet-loss [N-Term]	1108953086 1xMet-loss [N-Term]	PREDICTED: uncharacterized protein LOC104898867 [Beta vulgaris subsp. vulgaris]	1108953086	1	2493.33	25				72.1				507.9	352.6	67.4				192062				1.58201e+06	1.34699e+06	247809				377656
FALSE		High	Unambiguous	MAWSATAIGALLGLGTQMYSNALR	[-].MAWSATAIGALLGLGTQMYSNALR.[K]	1xMet-loss [N-Term]	1xMet-loss [N-Term]	3.33296e-07	5.33751e-05	2.614	1	1	28	1108953086	1108953086 [1-24]	1108953086 1xMet-loss [N-Term]	1108953086 1xMet-loss [N-Term]	PREDICTED: uncharacterized protein LOC104898867 [Beta vulgaris subsp. vulgaris]	1108953086	0	2365.23	24	73	27.9	76.4	103.3	229.6	36.7	59.7	193.7	118.2	81.5	7.56629e+06	5.87165e+06	9.94993e+06	1.10665e+07	9.43264e+06	6.36788e+06	5.31199e+06	2.42692e+07	1.81641e+07	1.2052e+07	1.53767e+07	5.87165e+06	1.60916e+07	2.17602e+07	4.8392e+07		7.73453e+06
FALSE		High	Unambiguous	MAVTFSDLSSPAGLDSLDAYLLSRSYITGYQASKDDLTVFSAVPK	[-].MAVTFSDLSSPAGLDSLDAYLLSRSYITGYQASKDDLTVFSAVPK.[A]	1xMet-loss+Acetyl [N-Term]	1xMet-loss+Acetyl [N-Term]	8.60338e-05	5.33751e-05	1.403	1	1	1	733214909	733214909 [1-45]	733214909 1xMet-loss+Acetyl [N-Term]	733214909 1xMet-loss+Acetyl [N-Term]	elongation factor 1-delta [Beta vulgaris subsp. vulgaris]	733214909	2	4711.37	45		438.3							561.7			1385256							1.29418e+06			1385256
FALSE		High	Unambiguous	MAVTFSDLSSPAGLDSLDAYLLSR	[-].MAVTFSDLSSPAGLDSLDAYLLSR.[S]	1xMet-loss+Acetyl [N-Term]	1xMet-loss+Acetyl [N-Term]	1.78215e-08	5.33751e-05	3.244	1	1	42	733214909	733214909 [1-24]	733214909 1xMet-loss+Acetyl [N-Term]	733214909 1xMet-loss+Acetyl [N-Term]	elongation factor 1-delta [Beta vulgaris subsp. vulgaris]	733214909	0	2440.22	24	109.7	237.2	83.8	83.7	241.5	43.5	48.3	70.7	52.3	29.4	5.62286e+07	247082363	5.40071e+07	4.4334e+07	4.90342e+07	37304347	2.12163e+07	4.37738e+07	3.96945e+07	2.15288e+07	1.14271e+08	247082363	8.73434e+07	8.71746e+07	2.51558e+08		4.53105e+07
FALSE		High	Unambiguous	MAVTFSDLSSPAGLDSLDAYLLSR	[-].MAVTFSDLSSPAGLDSLDAYLLSR.[S]	1xMet-loss [N-Term]	1xMet-loss [N-Term]	5.81283e-09	5.33751e-05	3.485	1	1	64	733214909	733214909 [1-24]	733214909 1xMet-loss [N-Term]	733214909 1xMet-loss [N-Term]	elongation factor 1-delta [Beta vulgaris subsp. vulgaris]	733214909	0	2398.21	24	163.5	166.5	97.6	85.2	43.4	39.4	104.9	128.3	77.4	93.8	9.57694e+07	1.98207e+08	7.18461e+07	5.15647e+07	1.00595e+07	3.85915e+07	5.26629e+07	9.07897e+07	6.71394e+07	7.8363e+07	1.94629e+08	1.98207e+08	1.16194e+08	1.01393e+08	5.1608e+07		4.68739e+07
FALSE		High	Unambiguous	IINEPTAAAIAYGLDKKATSVGEK	[R].IINEPTAAAIAYGLDKKATSVGEK.[N]	1xGG [K/S/T]	1xGG [K16; K17; T19; S20]	0.00684858	0.000491899	0.621	1	2	4	731318762	731318762 [176-199]; [1051-1074]			PREDICTED: LOW QUALITY PROTEIN: uncharacterized protein LOC104887018 [Beta vulgaris subsp. vulgaris]	731316940; 731318762	2	2574.38	24
FALSE		High	Unambiguous	MAVPQIEDIVR	[K].MAVPQIEDIVR.[A]			4.41371e-05	5.33751e-05	1.556	1	1	82	731334617	731334617 [344-354]			PREDICTED: pyruvate dehydrogenase E1 component subunit beta-1, mitochondrial [Beta vulgaris subsp. vulgaris]	731334617	0	1270.68	11	263.6	123.6	38.5	121	130	45.1	43.6	102.6	82.1	49.9	6.8719e+07	6.54934e+07	1.26278e+07	3.26031e+07	1.34293e+07	1.96682e+07	9.75333e+06	3.23129e+07	3.17303e+07	1.85401e+07	1.39655e+08	6.54934e+07	2.04225e+07	6.4108e+07	6.88958e+07		2.38893e+07
FALSE		High	Unambiguous	MAVIFKDLHTETGLKSLDDHLSGK	[-].MAVIFKDLHTETGLKSLDDHLSGK.[S]	1xMet-loss [N-Term]	1xMet-loss [N-Term]	7.43686e-09	5.33751e-05	3.432	1	1	5	731326055	731326055 [1-24]	731326055 1xMet-loss [N-Term]	731326055 1xMet-loss [N-Term]	PREDICTED: elongation factor 1-beta 2 [Beta vulgaris subsp. vulgaris]	731326055	2	2524.34	24	267.2	43.9		660.8	5.8			20.4	2.1		8.5729e+06	2.86085e+06		21912573	73427.3			788825	97951.4		1.74224e+07	2.86085e+06		4.30871e+07	376702
FALSE		High	Unambiguous	MAVIFKDLHTETGLK	[-].MAVIFKDLHTETGLK.[S]	1xMet-loss+Acetyl [N-Term]	1xMet-loss+Acetyl [N-Term]	1.46387e-07	5.33751e-05	2.791	1	1	83	731326055	731326055 [1-15]	731326055 1xMet-loss+Acetyl [N-Term]	731326055 1xMet-loss+Acetyl [N-Term]	PREDICTED: elongation factor 1-beta 2 [Beta vulgaris subsp. vulgaris]	731326055	1	1613.89	15	141.6	148.5	65.9	143.5	62.5	133.5	59.2	60.4	88.5	96.5	7.30811e+07	1.55742e+08	4.271e+07	7.65306e+07	1.27838e+07	1.15289e+08	2.61967e+07	3.76457e+07	6.76371e+07	7.10522e+07	1.4852e+08	1.55742e+08	6.90732e+07	1.50483e+08	6.55845e+07		1.40031e+08
FALSE		High	Unambiguous	MAVIFKDLHTETGLK	[-].MAVIFKDLHTETGLK.[S]	1xMet-loss [N-Term]	1xMet-loss [N-Term]	1.33144e-06	5.33751e-05	2.316	1	1	48	731326055	731326055 [1-15]	731326055 1xMet-loss [N-Term]	731326055 1xMet-loss [N-Term]	PREDICTED: elongation factor 1-beta 2 [Beta vulgaris subsp. vulgaris]	731326055	1	1571.88	15	153.3	72.5	119.7	301	151.7	23.1	47	45.4	36.8	49.5	3.14178e+07	3.0176e+07	3.08142e+07	6.37589e+07	1.23128e+07	7.92569e+06	8.25714e+06	1.12511e+07	1.11773e+07	1.44696e+07	6.38492e+07	3.0176e+07	4.98346e+07	1.2537e+08	6.31677e+07		9.62668e+06
FALSE		High	Unambiguous	MAVHPQGDGLICSFPKDCR	[R].MAVHPQGDGLICSFPKDCR.[W]	2xCarbamidomethyl [C12; C18]	2xCarbamidomethyl [C12; C18]	6.53705e-05	5.33751e-05	1.467	1	1	2	731360672	731360672 [92-110]			PREDICTED: SEC12-like protein 2 [Beta vulgaris subsp. vulgaris]	731360672	1	2188.01	19	211.2	65.9	2.9	216.8	435.5	26.3		29.3		12.1	1.62531e+06	1.03031e+06	28054.9	1.72468e+06	1.32762e+06	338431		272297		132483	3.30305e+06	1.03031e+06	45372.1	3.39127e+06	6.81103e+06		411064
FALSE		High	Unambiguous	MAVEPLRVLVTGAAGQIGYALVPMIAR	[-].MAVEPLRVLVTGAAGQIGYALVPMIAR.[G]	1xAcetyl [N-Term]; 2xPhospho [E4; R7]	1xAcetyl [N-Term]; 2xPhospho [E4; R7]	5.78379e-05	5.33751e-05	1.495	1	1	1	733215721	733215721 [1-27]	733215721 1xAcetyl [N-Term]; 2xPhospho [E4; R7]	733215721 1xAcetyl [N-Term]; 2xPhospho [E4; R7]	malate dehydrogenase, cytoplasmic [Beta vulgaris subsp. vulgaris]	733215721	1	2998.51	27
FALSE		High	Unambiguous	MAVEIVNGPTHFELNTGAK	[-].MAVEIVNGPTHFELNTGAK.[I]	1xMet-loss+Acetyl [N-Term]	1xMet-loss+Acetyl [N-Term]	9.39649e-07	5.33751e-05	2.391	1	1	6	731323424	731323424 [1-19]	731323424 1xMet-loss+Acetyl [N-Term]	731323424 1xMet-loss+Acetyl [N-Term]	PREDICTED: aldo-keto reductase family 4 member C9 [Beta vulgaris subsp. vulgaris]	731323424	0	1938.99	19	325.2	265.8	6.1	50.6	18.5	69.2		139.3	90	35.3	2.31685e+06	3.84803e+06	54208	372820	52326.6	825519		1.19882e+06	950306	358730	4.70845e+06	3.84803e+06	87668.4	733083	268450		1.00269e+06
FALSE		High	Unambiguous	MAVELQPTHILIIPYPAQGHLIPILDLTHHLASTGR	[-].MAVELQPTHILIIPYPAQGHLIPILDLTHHLASTGR.[F]	1xMet-loss+Acetyl [N-Term]	1xMet-loss+Acetyl [N-Term]	6.14979e-05	5.33751e-05	1.481	1	1	1	731367757	731367757 [1-36]	731367757 1xMet-loss+Acetyl [N-Term]	731367757 1xMet-loss+Acetyl [N-Term]	PREDICTED: UDP-glycosyltransferase 89B2 [Beta vulgaris subsp. vulgaris]	731367757	0	3877.15	36										1000										531027
FALSE		High	Unambiguous	MATVPGALIWEIVKK	[-].MATVPGALIWEIVKK.[N]	1xMet-loss+Acetyl [N-Term]	1xMet-loss+Acetyl [N-Term]	3.69843e-06	5.33751e-05	2.096	1	1	77	731357196	731357196 [1-15]	731357196 1xMet-loss+Acetyl [N-Term]	731357196 1xMet-loss+Acetyl [N-Term]	PREDICTED: 60S ribosomal protein L28-1 [Beta vulgaris subsp. vulgaris]	731357196	1	1566.93	15	132.9	177.4	117.2	130.3	61.8	120	91.6	53.6	68.3	47	124399184	3.3747e+08	1.37939e+08	1.26108e+08	2.29126e+07	1.88027e+08	7.35157e+07	6.06792e+07	9.47181e+07	6.2706e+07	2.52812e+08	3.3747e+08	2.23084e+08	2.47968e+08	1.17548e+08		2.28381e+08
FALSE		High	Unambiguous	MAVIFKDLHTETGLKSLDDHLSGK	[-].MAVIFKDLHTETGLKSLDDHLSGK.[S]	1xMet-loss+Acetyl [N-Term]	1xMet-loss+Acetyl [N-Term]	9.29603e-09	5.33751e-05	3.384	1	1	25	731326055	731326055 [1-24]	731326055 1xMet-loss+Acetyl [N-Term]	731326055 1xMet-loss+Acetyl [N-Term]	PREDICTED: elongation factor 1-beta 2 [Beta vulgaris subsp. vulgaris]	731326055	2	2566.35	24	402.5	106.4	18.4	141.4	14.2	11.9	80	107.1	74.1	43.9	4.06127e+07	2.18176e+07	2.33549e+06	1.47407e+07	569461	2.0146e+06	6.91772e+06	1.30485e+07	1.10793e+07	6.32162e+06	8.25356e+07	2.18176e+07	3.77709e+06	2.89849e+07	2.92148e+06		2.44697e+06
FALSE		High	Unambiguous	MAYPMKPTKPGMEESQETTHKIR	[-].MAYPMKPTKPGMEESQETTHKIR.[I]	1xMet-loss+Acetyl [N-Term]	1xMet-loss+Acetyl [N-Term]	1.30712e-09	5.33751e-05	3.806	1	2	9	731322607	731322607 [1-23]	731322607 1xMet-loss+Acetyl [N-Term]	731322607 1xMet-loss+Acetyl [N-Term]	PREDICTED: 40S ribosomal protein S20-2 [Beta vulgaris subsp. vulgaris]	731377213; 731322607	1	2601.28	23	338.2	62.8	20.5	275.7	122.1		10.9	81.7	13.3	74.7	1.83055e+07	6.90416e+06	1.3961e+06	1.54202e+07	2.61821e+06		505530	5.34232e+06	1.06546e+06	5769473	3.72017e+07	6.90416e+06	2.25786e+06	3.03209e+07	1.34321e+07
FALSE		High	Unambiguous	GVVATTDVAEACKGVNVAVMVGGFPR	[K].GVVATTDVAEACKGVNVAVMVGGFPR.[K]	1xCarbamidomethyl [C12]; 1xOxidation [M20]; 1xGG [K13]	1xCarbamidomethyl [C12]; 1xOxidation [M20]; 1xGG [K13]	0.00668283	0.000491899	0.624	1	1	1	733215721	733215721 [68-93]			malate dehydrogenase, cytoplasmic [Beta vulgaris subsp. vulgaris]	733215721	1	2734.37	26
FALSE		High	Unambiguous	MCIDDGRVVSNFVAQALR	[R].MCIDDGRVVSNFVAQALR.[K]	1xCarbamidomethyl [C2]	1xCarbamidomethyl [C2]	6.8866e-05	5.33751e-05	1.455	2	2	8	731345960; 731346576	731345960 [299-316]; 731346576 [297-314]			PREDICTED: UDP-glucuronic acid decarboxylase 1 [Beta vulgaris subsp. vulgaris] PREDICTED: UDP-glucuronic acid decarboxylase 2 [Beta vulgaris subsp. vulgaris]	731345960; 731346576	1	2051.02	18	57.7	149.6		149.4	149.1	100.7	67.4	202.9	111.9	11.4	1.11182e+06	5.86119e+06		2.97708e+06	1.13891e+06	3.24682e+06	1.11395e+06	4.72444e+06	3.19726e+06	312659	2.2595e+06	5.86119e+06		5.85388e+06	5.84294e+06		3.94364e+06
FALSE		High	Unambiguous	MDGDLWDLVLTPDNEYR	[R].MDGDLWDLVLTPDNEYR.[R]			3.25079e-05	5.33751e-05	1.624	1	1	3	731348509	731348509 [965-981]			PREDICTED: clathrin heavy chain 1 [Beta vulgaris subsp. vulgaris]	731348509	0	2051.94	17		170		152.1		284.5	209.9	65	118.5			913087		415382		1.2579e+06	475653	207355	464077			913087		816772			1.52787e+06
FALSE		High	Unambiguous	MDGAVQTVYPR	[K].MDGAVQTVYPR.[K]			7.22182e-05	5.33751e-05	1.444	1	1	3	731359368	731359368 [149-159]			PREDICTED: protein CDI [Beta vulgaris subsp. vulgaris]	731359368	0	1236.6	11		20.9		79.5	58.3	117.6	281.3	118.7	140.7	182.9		240258		464914	130746	1.1133e+06	1.3646e+06	811512	1.17899e+06	1.47586e+06		240258		914168	670764		1.35223e+06
FALSE		High	Unambiguous	MDFVPAESAIKVDSIPVDPETIDMLAALGMSELPGIVK	[R].MDFVPAESAIKVDSIPVDPETIDMLAALGMSELPGIVK.[A]			0.000109917	5.33751e-05	1.344	1	1	5	731366450	731366450 [82-119]			PREDICTED: 40S ribosomal protein S17 [Beta vulgaris subsp. vulgaris]	731366450	1	3999.04	38	182.4	225.3		40.7	499.6	36.6				15.4	1.49021e+06	3741721		343422	1.6173e+06	500374				179487	3.0285e+06	3741721		675275	8.29716e+06		607763
FALSE		High	Unambiguous	MDFIPGIDGPSEGVPR	[R].MDFIPGIDGPSEGVPR.[V]			1.97853e-05	5.33751e-05	1.733	1	1	37	731357000	731357000 [219-234]			PREDICTED: UDP-D-apiose/UDP-D-xylose synthase 2 [Beta vulgaris subsp. vulgaris]	731357000	0	1686.82	16	245.4	155.5	12.7	89	94.3	59.1	94	82.4	91.6	76	1.51898e+07	1.95564e+07	990442	5.69606e+06	2.31265e+06	6.12344e+06	4.98981e+06	6.16084e+06	8.39617e+06	6.71026e+06	3.08696e+07	1.95564e+07	1.6018e+06	1.12003e+07	1.18645e+07		7.43763e+06
FALSE		High	Unambiguous	MDFLETPEMQMLAIGVAFLVVIATLVFFTSKNKSR	[-].MDFLETPEMQMLAIGVAFLVVIATLVFFTSKNKSR.[V]			1.16027e-07	5.33751e-05	2.841	1	1	3	731367263	731367263 [1-35]			PREDICTED: NADH--cytochrome b5 reductase 1 [Beta vulgaris subsp. vulgaris]	731367263	2	3947.09	35				313.6	290.4				396					1691945	600508				3.06224e+06					3.3269e+06	3.08077e+06
FALSE		High	Unambiguous	MDFDEYEYLEKTVEEETEGR	[-].MDFDEYEYLEKTVEEETEGR.[S]	1xAcetyl [N-Term]	1xAcetyl [N-Term]	3.37062e-06	5.33751e-05	2.116	1	1	4	731338745	731338745 [1-20]	731338745 1xAcetyl [N-Term]	731338745 1xAcetyl [N-Term]	PREDICTED: RNA-binding protein 39 [Beta vulgaris subsp. vulgaris]	731338745	1	2554.08	20		329.3	101.9	61.5	59.6		152	142.9	75.9	77.1		3.44475e+06	658959	327074	121506		670981	888500	578598	566193		3.44475e+06	1.06571e+06	643130	623358
FALSE		High	Unambiguous	MDEEYDVIVLGTGLKECILSGLLSVDGLK	[-].MDEEYDVIVLGTGLKECILSGLLSVDGLK.[V]	1xAcetyl [N-Term]; 1xCarbamidomethyl [C17]	1xAcetyl [N-Term]; 1xCarbamidomethyl [C17]	7.93697e-09	5.33751e-05	3.418	1	2	11	731323630	731323630 [1-29]	731323630 1xAcetyl [N-Term]	731323630 1xAcetyl [N-Term]	PREDICTED: guanosine nucleotide diphosphate dissociation inhibitor 1 [Beta vulgaris subsp. vulgaris]	731359668; 731323630	1	3208.64	29		20.9	43.1	104.8	375.9	176.2		247.1	5.7	26.2		854971	1.09187e+06	2.18158e+06	2.99941e+06	5.94005e+06		6.01416e+06	171327	751734		854971	1.76584e+06	4.28968e+06	1.53877e+07		7.21488e+06
FALSE		High	Unambiguous	MDEEYDVIVLGTGLK	[-].MDEEYDVIVLGTGLK.[E]	1xAcetyl [N-Term]	1xAcetyl [N-Term]	7.551e-06	5.33751e-05	1.942	1	2	10	731323630	731323630 [1-15]	731323630 1xAcetyl [N-Term]	731323630 1xAcetyl [N-Term]	PREDICTED: guanosine nucleotide diphosphate dissociation inhibitor 1 [Beta vulgaris subsp. vulgaris]	731359668; 731323630	0	1723.85	15	108.3	77.1	90.9	83	37.4	179.7	54.4	188.2	109	72	1.27262e+06	1.84052e+06	1.34196e+06	1.00746e+06	174069	3.53243e+06	548194	2.67116e+06	1.89757e+06	1.20588e+06	2.5863e+06	1.84052e+06	2.17029e+06	1.98098e+06	893021		4.29054e+06
FALSE		High	Unambiguous	MDEEMNAVAEMNAVASK	[-].MDEEMNAVAEMNAVASK.[V]	1xAcetyl [N-Term]	1xAcetyl [N-Term]	1.06714e-07	5.33751e-05	2.859	1	1	14	731331965	731331965 [1-17]	731331965 1xAcetyl [N-Term]	731331965 1xAcetyl [N-Term]	PREDICTED: soluble inorganic pyrophosphatase 1 isoform X2 [Beta vulgaris subsp. vulgaris]	731331965	0	1881.8	17	376.5	231.7		55.6	28.8	18.5	20.2	143	91.1	34.5	1.03006e+07	12881432		1.57156e+06	312590	848506	474138	4.72714e+06	3.69044e+06	1.34527e+06	2.09335e+07	12881432		3.09019e+06	1.60367e+06		1.03061e+06
FALSE		High	Unambiguous	MDEELLELQKQFEFAQQVK	[-].MDEELLELQKQFEFAQQVK.[S]	1xAcetyl [N-Term]	1xAcetyl [N-Term]	2.02256e-06	5.33751e-05	2.226	1	1	4	731349165	731349165 [1-19]	731349165 1xAcetyl [N-Term]	731349165 1xAcetyl [N-Term]	PREDICTED: E3 UFM1-protein ligase 1 homolog isoform X1 [Beta vulgaris subsp. vulgaris]	731349165	1	2395.18	19	89	367.4	65	102.1	47.6	53.8	28.4	70.4	116.4	59.8	703775	5904272	646077	834340	149175	711631	192512	672896	1.36414e+06	674760	1.43025e+06	5904272	1.04487e+06	1.64058e+06	765305		864359
FALSE		High	Unambiguous	MDEAKVNQLKQFVDLCK	[-].MDEAKVNQLKQFVDLCK.[A]	1xAcetyl [N-Term]; 1xCarbamidomethyl [C16]	1xAcetyl [N-Term]; 1xCarbamidomethyl [C16]	9.2392e-08	5.33751e-05	2.89	1	1	2	731330577	731330577 [1-17]	731330577 1xAcetyl [N-Term]	731330577 1xAcetyl [N-Term]	PREDICTED: FAM10 family protein At4g22670 [Beta vulgaris subsp. vulgaris]	731330577	2	2108.05	17	81.1	331.4		35.6	392.3			112.2	13.7	33.8	651594	5414377		295426	1.24923e+06			1.08919e+06	163428	387809	1.32421e+06	5414377		580900	6.40887e+06
FALSE		High	Unambiguous	MDEAEAVETAKEWTR	[K].MDEAEAVETAKEWTR.[L]			1.11791e-07	5.33751e-05	2.849	1	1	22	731329120	731329120 [133-147]			PREDICTED: ubiquitin-conjugating enzyme E2 35 [Beta vulgaris subsp. vulgaris]	731329120	1	1765.81	15	198.1	121.2	56.8	83.7	235.4	28.3	98.7	62.3	75.1	40.3	6.9324e+06	8.61877e+06	2.49538e+06	3.02531e+06	3.26185e+06	1.65681e+06	2.96272e+06	2.63505e+06	3.89495e+06	2.01265e+06	1.40885e+07	8.61877e+06	4.03568e+06	5.94873e+06	1.67341e+07		2.01239e+06
FALSE		High	Unambiguous	MDDMKGDKLILR	[-].MDDMKGDKLILR.[G]	1xAcetyl [N-Term]	1xAcetyl [N-Term]	1.44119e-05	5.33751e-05	1.802	1	1	30	1108959960	1108959960 [1-12]	1108959960 1xAcetyl [N-Term]	1108959960 1xAcetyl [N-Term]	PREDICTED: dihydroneopterin aldolase 2 [Beta vulgaris subsp. vulgaris]	1108959960	2	1476.75	12	76.1	60.3	168.6	195.8	234.3	22.3	58.9	92.6	44.4	46.8	6.72225e+06	1.08277e+07	1.87246e+07	1.78796e+07	8.20079e+06	3.29353e+06	4.46457e+06	9.88804e+06	5.81075e+06	5.89397e+06	1.36614e+07	1.08277e+07	3.02825e+07	3.51569e+07	4.20722e+07		4.00038e+06
FALSE		High	Unambiguous	MDCFPALQMHSDWVR	[K].MDCFPALQMHSDWVR.[D]	1xCarbamidomethyl [C3]	1xCarbamidomethyl [C3]	2.06177e-05	5.33751e-05	1.724	1	1	12	731353131	731353131 [200-214]			PREDICTED: protein transport protein SEC13 homolog B [Beta vulgaris subsp. vulgaris]	731353131	0	1892.82	15		142.5	201.6	211.7	44.5	99.9	47.6	76.5	113.4	62.3		5.57887e+06	4.8784e+06	4.21427e+06	339396	3.21971e+06	785913	1.78006e+06	3.23677e+06	1.71291e+06		5.57887e+06	7.88964e+06	8.28658e+06	1.74119e+06		3.91072e+06
FALSE		High	Unambiguous	MDATGAELVEEK	[K].MDATGAELVEEK.[A]	1xOxidation [M1]	1xOxidation [M1]	7.31576e-05	5.33751e-05	1.441	1	1	2	733215721	733215721 [313-324]			malate dehydrogenase, cytoplasmic [Beta vulgaris subsp. vulgaris]	733215721	0	1308.6	12	130.1	229.6	0.5	22.6	52.4	16.6	39.4	145.3	31.3	332.2	2.41532e+06	8663986	10657.6	433777	385594	516539	627380	3.25925e+06	861922	8.7992e+06	4.90856e+06	8663986	17236.1	852943	1.9782e+06		627396
FALSE		High	Unambiguous	MDATGAELVEEK	[K].MDATGAELVEEK.[A]			3.8383e-06	5.33751e-05	2.088	1	1	20	733215721	733215721 [313-324]			malate dehydrogenase, cytoplasmic [Beta vulgaris subsp. vulgaris]	733215721	0	1292.6	12	162.1	124.7	6.3	38.5	40.1	91.8	152.5	135.4	142.4	106.2	22050072	3.44641e+07	1.08176e+06	5.41315e+06	2.16018e+06	2.08865e+07	1.77921e+07	2.2258e+07	2.87049e+07	2.06071e+07	4.48115e+07	3.44641e+07	1.74949e+06	1.0644e+07	1.10823e+07		2.53691e+07
FALSE		High	Unambiguous	MDAIDQVFDPLRDFSKDSIR	[-].MDAIDQVFDPLRDFSKDSIR.[L]	1xAcetyl [N-Term]	1xAcetyl [N-Term]	1.30933e-07	5.33751e-05	2.815	1	1	63	731338096	731338096 [1-20]	731338096 1xAcetyl [N-Term]	731338096 1xAcetyl [N-Term]	PREDICTED: protein transport protein Sec61 subunit gamma-1 [Beta vulgaris subsp. vulgaris]	731338096	2	2410.17	20	106.1	76.5	164.4	225.6	68.5	94.3	78.8	49.5	89.9	46.3	2.51185e+07	3.67703e+07	4.88974e+07	5.51718e+07	6.42272e+06	3.73266e+07	1.59998e+07	1.41543e+07	3.15358e+07	1.56295e+07	5.10473e+07	3.67703e+07	7.90798e+07	1.08485e+08	3.29503e+07		4.53375e+07
FALSE		High	Unambiguous	MDAIDQVFDPLRDFSK	[-].MDAIDQVFDPLRDFSK.[D]	1xAcetyl [N-Term]	1xAcetyl [N-Term]	1.23604e-06	5.33751e-05	2.332	1	1	11	731338096	731338096 [1-16]	731338096 1xAcetyl [N-Term]	731338096 1xAcetyl [N-Term]	PREDICTED: protein transport protein Sec61 subunit gamma-1 [Beta vulgaris subsp. vulgaris]	731338096	1	1938.93	16		57.7	206.3	150.3	82.9	97.5	85.1	79.7	122.2	118.3		3.00437e+06	6644573	3981615	841215	4.18136e+06	1.87097e+06	2.46893e+06	4.63917e+06	4325926		3.00437e+06	1.0746e+07	7.82912e+06	4.31566e+06		5.07874e+06
FALSE		High	Unambiguous	MCMAAPTVEQFLEAVKETVLANER	[R].MCMAAPTVEQFLEAVKETVLANER.[W]	1xCarbamidomethyl [C2]	1xCarbamidomethyl [C2]	1.83459e-06	5.33751e-05	2.247	1	1	2	731339333	731339333 [166-189]			PREDICTED: branched-chain-amino-acid aminotransferase 5, chloroplastic [Beta vulgaris subsp. vulgaris]	731339333	1	2737.34	24		50	242.4	47.6	179.2		252.1	28.6	161.5	38.7		1.85045e+06	5547757	895920	1.29285e+06		3938420	629191	4.35756e+06	1.00584e+06		1.85045e+06	8.97216e+06	1.76166e+06	6.63268e+06
FALSE		High	Unambiguous	IVYIKPSGTTLSFNELVSLWEK	[K].IVYIKPSGTTLSFNELVSLWEK.[K]			3.07181e-06	5.33751e-05	2.136	1	1	36	731358632	731358632 [239-260]			PREDICTED: isoflavone reductase-like protein [Beta vulgaris subsp. vulgaris]	731358632	0	2524.37	22	121	93.7	121.1	81.6	24.4	35	103.2	102	213.3	104.6	9.52612e+06	1.49899e+07	1.198e+07	6.63422e+06	760562	4.60407e+06	6.96783e+06	9.69469e+06	2.48753e+07	1.17387e+07	1.93596e+07	1.49899e+07	1.93747e+07	1.3045e+07	3.90189e+06		5.59218e+06
FALSE		High	Unambiguous	MGIKIHGSPFSTATLR	[-].MGIKIHGSPFSTATLR.[A]	1xMet-loss [N-Term]	1xMet-loss [N-Term]	3.57915e-08	5.33751e-05	3.094	1	1	139	731370642	731370642 [1-16]	731370642 1xMet-loss [N-Term]	731370642 1xMet-loss [N-Term]	PREDICTED: glutathione S-transferase [Beta vulgaris subsp. vulgaris]	731370642	1	1584.89	16	285.5	49.5	4.6	224.7	251.2	1.6	21.7	55	69.2	37.1	5.43984e+08	1.91683e+08	1.10027e+07	4.42552e+08	1.89583e+08	5.11879e+06	3.54473e+07	1.2664e+08	1.95416e+08	1.00709e+08	1.10552e+09	1.91683e+08	1.77942e+07	8.70198e+08	9.72612e+08		6.21737e+06
FALSE		High	Unambiguous	IVYIDGAFDLFHAGHVEILR	[R].IVYIDGAFDLFHAGHVEILR.[L]			4.07691e-06	5.33751e-05	2.075	1	1	1	731346843	731346843 [257-276]			PREDICTED: ethanolamine-phosphate cytidylyltransferase [Beta vulgaris subsp. vulgaris]	731346843	0	2285.21	20	840					160					954178					304107					1.93914e+06						369373
FALSE		High	Unambiguous	LVYAMNTHVHADHVTGTGMLK	[K].LVYAMNTHVHADHVTGTGMLK.[S]			5.30516e-07	5.33751e-05	2.514	1	2	7	731365484	731365484 [102-122]			PREDICTED: persulfide dioxygenase ETHE1 homolog, mitochondrial isoform X1 [Beta vulgaris subsp. vulgaris]	731365484; 731365486	0	2295.14	21	226.8	17.4	105.8	212.3	321.6	28.2	30.3	6.9		50.7	1.24314e+07	1.94002e+06	7.28461e+06	1.20299e+07	6.98329e+06	2.58378e+06	1.42272e+06	459321		3.96345e+06	2.52638e+07	1.94002e+06	1.17811e+07	2.36546e+07	3.58262e+07		3.13831e+06
FALSE		High	Unambiguous	LTALHPEIEELLFSETQNEEHICVLK	[R].LTALHPEIEELLFSETQNEEHICVLK.[D]	1xCarbamidomethyl [C23]	1xCarbamidomethyl [C23]	3.16627e-10	5.33751e-05	4.111	1	2	33	1108966238	1108966238 [538-563]			PREDICTED: sucrose synthase isoform X2 [Beta vulgaris subsp. vulgaris]	1108966230; 1108966238	0	3092.56	26	7.3	43.3	308.9	115.6	4.3	112.9	103.8	145.7	80.6	77.7	2.53433e+06	3.07395e+07	135608249	4.17332e+07	589396	6.6002e+07	3.109e+07	6.14723e+07	4.1741e+07	3.87031e+07	5.15042e+06	3.07395e+07	2.19314e+08	8.20607e+07	3.02376e+06		8.01671e+07
FALSE		High	Unambiguous	LTAHQVLCHPWICESGVAPDR	[R].LTAHQVLCHPWICESGVAPDR.[A]	2xCarbamidomethyl [C8; C13]	2xCarbamidomethyl [C8; C13]	4.95364e-06	5.33751e-05	2.033	1	1	3	731358117	731358117 [366-386]			PREDICTED: calcium-dependent protein kinase 26 [Beta vulgaris subsp. vulgaris]	731358117	0	2446.18	21		10	5.5	201.5	423.2	1.7	1.2			356.9		293695	99352.1	3.02171e+06	2.4322e+06	40461.2	15215.8			7385054		293695	160678	5.94163e+06	1.24778e+07		49144.8
FALSE		High	Unambiguous	LTAFQPFDSALDALNQASAISEGVMTDELR	[K].LTAFQPFDSALDALNQASAISEGVMTDELR.[S]			2.0299e-08	5.33751e-05	3.216	1	1	12	731333770	731333770 [47-76]			PREDICTED: nucleolar protein 56 [Beta vulgaris subsp. vulgaris]	731333770	0	3210.56	30	65.2	145.2	23.1	254.2	334.1	29.9	3.9	48.4	77.2	18.8	3.82692e+06	1.73052e+07	1.7023e+06	1.54086e+07	7.76174e+06	2.93113e+06	197426	3.43034e+06	6.71257e+06	1.57096e+06	7.77731e+06	1.73052e+07	2.75306e+06	3.02981e+07	3.98198e+07		3.5602e+06
FALSE		High	Unambiguous	LTAFELVHDNIPATLIADSAAAALMK	[R].LTAFELVHDNIPATLIADSAAAALMK.[A]			1.4369e-07	5.33751e-05	2.795	1	1	28	731374071	731374071 [227-252]			PREDICTED: methylthioribose-1-phosphate isomerase [Beta vulgaris subsp. vulgaris]	731374071	0	2696.43	26	95.2	98.3	40.3	254.9	36.5	34.2	91.5	64.9	168.5	115.7	6.425e+06	1.34848e+07	3.41864e+06	1.77803e+07	974666	3.85746e+06	5.29306e+06	5.28804e+06	1.68464e+07	1.11381e+07	1.30573e+07	1.34848e+07	5.52882e+06	3.49616e+07	5.00029e+06		4.68533e+06
FALSE		High	Unambiguous	LTAEFEKINKK	[R].LTAEFEKINKK.[L]			3.68873e-05	5.33751e-05	1.596	1	1	7	731339820	731339820 [169-179]			PREDICTED: probable ATP synthase 24 kDa subunit, mitochondrial [Beta vulgaris subsp. vulgaris]	731339820	2	1320.75	11	395.9	80		235.4	27.9	2.5	35.9	128.3	86.8	7.3	1.9319e+07	7936585		1.18712e+07	538425	207545	1.50267e+06	7.56612e+06	6.27947e+06	505843	3.92612e+07	7936585		2.33425e+07	2.76226e+06		252088
FALSE		High	Unambiguous	ITACLDPDGWK	[K].ITACLDPDGWK.[TA]	1xCarbamidomethyl [C4]	1xCarbamidomethyl [C4]	8.03868e-05	5.33751e-05	1.419	1	2	5	731353854	731353854 [329-339]			PREDICTED: probable lactoylglutathione lyase, chloroplastic isoform X1 [Beta vulgaris subsp. vulgaris]	731353854; 731317238	0	1275.6	11	13.8	314.1	33.9	12.2	47.3	162.1	183.7	114.9	64.7	53.4	117900	5.46143e+06	364523	108023	160227	2.32051e+06	1.348e+06	1.18812e+06	820098	651159	239604	5.46143e+06	589527	212407	822008		2.81853e+06
FALSE		High	Unambiguous	ITAAQVLDHPWLRDGEASDKPIDSAVLSR	[R].ITAAQVLDHPWLRDGEASDKPIDSAVLSR.[M]			1.2651e-06	5.33751e-05	2.327	1	1	14	731329667	731329667 [335-363]			PREDICTED: calcium-dependent protein kinase 33 [Beta vulgaris subsp. vulgaris]	731329667	1	3160.64	29	299.9	72.6	34.1	263	3.2	158.5	44.4	46.7	24.6	52.8	19864396	9.77681e+06	2.83775e+06	1.80063e+07	84386.4	17570938	2.52217e+06	3.73891e+06	2.41894e+06	4.99038e+06	4.03697e+07	9.77681e+06	4.58937e+06	3.5406e+07	432925		2.13419e+07
FALSE		High	Unambiguous	ITAAQVLDHPWLR	[R].ITAAQVLDHPWLR.[D]			1.98028e-07	5.33751e-05	2.726	1	1	24	731329667	731329667 [335-347]			PREDICTED: calcium-dependent protein kinase 33 [Beta vulgaris subsp. vulgaris]	731329667	0	1519.84	13	29.4	46.2	61.7	58.9	111	373.2	70.7	75.5	44.1	129	3.3485e+06	1.0684e+07	8823883	6.93142e+06	5.00443e+06	7.10475e+07	6.89979e+06	1.0373e+07	7.44143e+06	2.09408e+07	6.80502e+06	1.0684e+07	1.42705e+07	1.36294e+07	2.56741e+07		8.62954e+07
FALSE		High	Unambiguous	LTALHPEIEELLFSETQNEEHICVLKDR	[R].LTALHPEIEELLFSETQNEEHICVLKDR.[K]	1xCarbamidomethyl [C23]	1xCarbamidomethyl [C23]	2.76288e-09	5.33751e-05	3.645	1	2	102	1108966238	1108966238 [538-565]			PREDICTED: sucrose synthase isoform X2 [Beta vulgaris subsp. vulgaris]	1108966230; 1108966238	1	3363.69	28	26.6	76	191.7	127.3	90.7	93.6	68.9	150.9	106.8	67.5	2.41808e+07	140599218	2.19332e+08	1.19754e+08	3.27255e+07	1.426e+08	5.38343e+07	1.65956e+08	1.44137e+08	8.77244e+07	4.91417e+07	140599218	3.54716e+08	2.35475e+08	1.6789e+08		1.73204e+08
FALSE		High	Unambiguous	LTAAQALSHPWVR	[R].LTAAQALSHPWVR.[E]			2.02436e-05	5.33751e-05	1.728	1	1	1	731337710	731337710 [371-383]			PREDICTED: calcium-dependent protein kinase 18 [Beta vulgaris subsp. vulgaris]	731337710	0	1449.8	13				1000										913695										1.79661e+06
FALSE		High	Unambiguous	ISYVEDVAEGLESAPSALIGLYSGR	[K].ISYVEDVAEGLESAPSALIGLYSGR.[N]			1.46109e-06	5.33751e-05	2.296	1	2	1	731323544	731323544 [311-335]			PREDICTED: 2-alkenal reductase (NADP(+)-dependent) [Beta vulgaris subsp. vulgaris]	731323544; 731323547	0	2596.31	25	48.2						675.1		30.1	246.6	231894						2.78656e+06		214632	1.69317e+06	471269
FALSE		High	Unambiguous	LSYLQASSIIEAAR	[K].LSYLQASSIIEAAR.[M]			4.67719e-05	5.33751e-05	1.543	1	1	6	731336140	731336140 [100-113]			PREDICTED: methylcrotonoyl-CoA carboxylase subunit alpha, mitochondrial [Beta vulgaris subsp. vulgaris]	731336140	0	1521.83	14				72.3	50.5	144.5	126.6	248.6	141.3	216.2				460589	123403	1.4916e+06	669656	1.85199e+06	1.2912e+06	1.90243e+06				905664	633093		1.81172e+06
FALSE		High	Unambiguous	LSYIALDYEQEMETAK	[K].LSYIALDYEQEMETAK.[T]			6.04609e-06	5.33751e-05	1.99	1	2	4	731348994	731348994 [218-233]			PREDICTED: actin-66 [Beta vulgaris subsp. vulgaris]	731348994; 731315233	0	1903.9	16		141.1		50	58.6	52.2	53.8	414	118.9	111.4		1.72513e+06		310816	139584	525568	277262	3.00849e+06	1.05945e+06	955563		1.72513e+06		611163	716105		638364
FALSE		High	Unambiguous	LSYKEQEVSLLAK	[R].LSYKEQEVSLLAK.[L]			0.000109023	5.33751e-05	1.346	1	1	2	731359415	731359415 [223-235]			PREDICTED: N-alpha-acetyltransferase 15, NatA auxiliary subunit [Beta vulgaris subsp. vulgaris]	731359415	1	1507.84	13		269.8	141.2	291.8	187.2	16.1	7.3		86.6			2.64705e+06	856426	1.45574e+06	357908	130135	30274.1		619642			2.64705e+06	1.38506e+06	2.86244e+06	1.83616e+06		158064
FALSE		High	Unambiguous	LSYFYKHESCGQCTPCR	[R].LSYFYKHESCGQCTPCR.[E]	3xCarbamidomethyl [C10; C13; C16]	3xCarbamidomethyl [C10; C13; C16]	6.36842e-05	5.33751e-05	1.473	1	1	2	731343319	731343319 [394-410]			PREDICTED: NADH dehydrogenase [ubiquinone] flavoprotein 1, mitochondrial [Beta vulgaris subsp. vulgaris]	731343319	1	2192.93	17					25.4	157.5	72.7	507.4	236.9						25798	675601	159911	1.57119e+06	899879						132350		820597
FALSE		High	Unambiguous	ISYAESLPILR	[R].ISYAESLPILR.[N]			8.0045e-05	5.33751e-05	1.42	1	1	36	731367509	731367509 [445-455]			PREDICTED: bifunctional aspartate aminotransferase and glutamate/aspartate-prephenate aminotransferase [Beta vulgaris subsp. vulgaris]	731367509	0	1261.72	11	77.3	164.1	151.1	75.8	97.3	98.4	77.6	65.7	97.3	95.5	6.21744e+06	2.68288e+07	1.52781e+07	6.30548e+06	3.10125e+06	1.3242e+07	5.35179e+06	6.38404e+06	1.15963e+07	1.09625e+07	1.26355e+07	2.68288e+07	2.47087e+07	1.23986e+07	1.59103e+07		1.6084e+07
FALSE		High	Unambiguous	LSYAADLSSSSVEPVEK	[K].LSYAADLSSSSVEPVEK.[S]			2.63547e-06	5.33751e-05	2.169	1	1	10	731324350	731324350 [57-73]			PREDICTED: protein FATTY ACID EXPORT 1, chloroplastic [Beta vulgaris subsp. vulgaris]	731324350	0	1781.88	17	113	114.3		30.3	59.1	148.7	93	155.7	123.8	162	1.06989e+06	2.19816e+06		296618	221814	2.35576e+06	754955	1.78052e+06	1.7364e+06	2.1881e+06	2.1743e+06	2.19816e+06		583245	1.13796e+06		2.86134e+06
FALSE		High	Unambiguous	ISVWTNGSGSGGEVAGGTAMAEVANIYR	[K].ISVWTNGSGSGGEVAGGTAMAEVANIYR.[T]			1.60202e-05	5.33751e-05	1.779	1	1	5	731316769	731316769 [906-933]			PREDICTED: uncharacterized protein LOC104882957 [Beta vulgaris subsp. vulgaris]	731316769	0	2754.32	28	179.4	313.3		93.6	10.5	28.8	12.2	223.8	126.8	11.7	2.84428e+06	1.00937e+07		1.53455e+06	65903.7	763746	165622	4.28599e+06	2978422	264214	5.78033e+06	1.00937e+07		3.01742e+06	338103		927659
FALSE		High	Unambiguous	LTAAGIYTVEDFLR	[R].LTAAGIYTVEDFLR.[L]			4.49401e-06	5.33751e-05	2.054	1	1	14	731354280	731354280 [287-300]			PREDICTED: calmodulin-binding protein 60 D [Beta vulgaris subsp. vulgaris]	731354280	0	1568.83	14	64.9	142.7	21.6	144.4	80	170	76.1	109.8	83.5	106.9	1.50045e+06	6.70514e+06	627141	3.45092e+06	733106	6.57717e+06	1.508e+06	3.06702e+06	2860948	3.52493e+06	3.0493e+06	6.70514e+06	1.01425e+06	6.78561e+06	3.76103e+06		7.98873e+06
FALSE		High	Unambiguous	ISVTGASKLLANILYNYR	[R].ISVTGASKLLANILYNYR.[G]			1.09295e-05	5.33751e-05	1.862	1	1	5	731343293	731343293 [129-146]			PREDICTED: proteasome subunit beta type-5 [Beta vulgaris subsp. vulgaris]	731343293	1	1996.12	18	585.1	23.5						346.5	41.4	3.5	5.69696e+06	465488						4.07528e+06	596859	48676.6	1.15777e+07	465488
FALSE		High	Unambiguous	ITAIKDIIPLLEK	[K].ITAIKDIIPLLEK.[T]			1.00579e-05	5.33751e-05	1.88	1	1	45	731355347	731355347 [270-282]			PREDICTED: ruBisCO large subunit-binding protein subunit alpha [Beta vulgaris subsp. vulgaris]	731355347	1	1466.92	13	86.8	131.3	112.8	127.1	121.4	137.9	77.8	71	61	73	1.59178e+07	48953692	2.59996e+07	2.40984e+07	8.82365e+06	4.2331e+07	1.22387e+07	1.57302e+07	1.65919e+07	1.91025e+07	3.23492e+07	48953692	4.2048e+07	4.7385e+07	4.52677e+07		5.14159e+07
FALSE		High	Unambiguous	ITAIPATDEEMWGATFQVEGPVVLAATK	[K].ITAIPATDEEMWGATFQVEGPVVLAATK.[-]			2.6867e-05	5.33751e-05	1.666	1	1	8	731364516	731364516 [209-236]			PREDICTED: stem-specific protein TSJT1 [Beta vulgaris subsp. vulgaris]	731364516	0	2945.5	28	283.1	379.5		23.8	47.6		29.3	74.4	92.2	70.2	3.70044e+06	1.00815e+07		322158	246494		328377	1.1746e+06	1.78538e+06	1.30828e+06	7.52027e+06	1.00815e+07		633465	1.26458e+06
FALSE		High	Unambiguous	ITEEGKATINEQAKETQAALQAK	[R].ITEEGKATINEQAKETQAALQAK.[C]			7.03336e-09	5.33751e-05	3.444	1	1	8	731326031	731326031 [13-35]			PREDICTED: jasmonate-induced protein homolog [Beta vulgaris subsp. vulgaris]	731326031	2	2472.29	23	555.2	185.3	1.2	95.8	111.4	3.7	7.8	30.2	9.4		1.92761e+07	1.30713e+07	53218.3	3.43825e+06	1.53155e+06	214994	231431	1.2652e+06	484885		3.91741e+07	1.30713e+07	86067.8	6.76069e+06	7.85725e+06		261135
FALSE		High	Unambiguous	ITEEGKATINEQAK	[R].ITEEGKATINEQAK.[E]			2.34662e-06	5.33751e-05	2.194	1	1	8	731326031	731326031 [13-26]			PREDICTED: jasmonate-induced protein homolog [Beta vulgaris subsp. vulgaris]	731326031	1	1531.8	14	257.9	107.6	53.2		95	95.9	132.2	77.2	63.7	117.5	4.84338e+06	4.10737e+06	1.25481e+06		706864	3.01268e+06	2128742	1.75072e+06	1.77243e+06	3.1485e+06	9.84301e+06	4.10737e+06	2.02935e+06		3.6264e+06		3.65925e+06
FALSE		High	Unambiguous	LTDSVLQECDTR	[K].LTDSVLQECDTR.[E]	1xCarbamidomethyl [C9]	1xCarbamidomethyl [C9]	8.45905e-05	5.33751e-05	1.407	1	1	2	731375722	731375722 [145-156]			PREDICTED: prolyl endopeptidase [Beta vulgaris subsp. vulgaris]	731375722	0	1436.67	12		355			113.1	192.1	25.8	91.5	70.8	151.8		1913584			118808	852618	58621	293094	278352	574173		1913584			609517		1.0356e+06
FALSE		High	Unambiguous	LTDSFLDGTSSIYLEELQR	[R].LTDSFLDGTSSIYLEELQR.[A]			1.47754e-07	5.33751e-05	2.789	1	1	26	731358722	731358722 [68-86]			PREDICTED: 2-oxoglutarate dehydrogenase, mitochondrial [Beta vulgaris subsp. vulgaris]	731358722	0	2187.08	19	133	205.3	64.4	106.5	23.4	76.1	56.2	154.9	95.1	85	9.03852e+06	2.83498e+07	5.49504e+06	7.48005e+06	630474	8.65373e+06	3.27528e+06	1.27149e+07	9.56934e+06	8.23339e+06	1.83687e+07	2.83498e+07	8.88691e+06	1.47082e+07	3.2345e+06		1.0511e+07
FALSE		High	Unambiguous	ITDIENWGGLMGPKYDYFER	[R].ITDIENWGGLMGPKYDYFER.[G]			2.68292e-08	5.33751e-05	3.156	1	1	9	731338906	731338906 [63-82]			PREDICTED: PLAT domain-containing protein 3 [Beta vulgaris subsp. vulgaris]	731338906	1	2404.13	20	228.5	123	51.3	269.6	49.4		89.9	107.1	64.2	17	8660430	9469510	2443531	1.05605e+07	741397		2.92116e+06	4902480	3.60216e+06	917980	1.76003e+07	9469510	3.95182e+06	2.07653e+07	3.80356e+06
FALSE		High	Unambiguous	ITDIENWGGLMGPK	[R].ITDIENWGGLMGPK.[Y]			4.76727e-07	5.33751e-05	2.537	1	1	30	731338906	731338906 [63-76]			PREDICTED: PLAT domain-containing protein 3 [Beta vulgaris subsp. vulgaris]	731338906	0	1530.76	14	42	195.4	39.5	169	146.6	97.8	81.2	89.7	105	33.9	4.28559e+06	4.04722e+07	5.057e+06	1.78031e+07	5.9178e+06	1.66736e+07	7.10044e+06	1.10487e+07	1.58595e+07	4.92485e+06	8.70945e+06	4.04722e+07	8.17847e+06	3.50065e+07	3.03599e+07		2.02521e+07
FALSE		High	Unambiguous	ITDKLLETLEEFVRDR	[K].ITDKLLETLEEFVRDR.[T]			7.60419e-05	5.33751e-05	1.432	1	2	8	731316645	731316645 [342-357]			PREDICTED: probable clathrin assembly protein At4g32285 isoform X1 [Beta vulgaris subsp. vulgaris]	731316645; 1108880061	2	1977.07	16	4.1	39.2		81.5	245.5	23.4	454.4	13.5	53.9	84.5	41474.5	808079		854584	986224	397188	3.95246e+06	165757	810387	1.22179e+06	84287.1	808079		1.68038e+06	5.05959e+06		482431
FALSE		High	Unambiguous	ITDGTLLTQIER	[R].ITDGTLLTQIER.[Y]			2.20821e-05	5.33751e-05	1.709	1	1	4	731358716	731358716 [133-144]			PREDICTED: coatomer subunit gamma [Beta vulgaris subsp. vulgaris]	731358716	0	1359.75	12	28	107.7	189.4	37.8	100.7	106.2	96.6	91.1	125.1	117.4	503586	3.9348e+06	4.27915e+06	703125	717173	3.19328e+06	1.48884e+06	1.97954e+06	3.33248e+06	3.00967e+06	1.02342e+06	3.9348e+06	6.92049e+06	1.38257e+06	3.67929e+06		3.87861e+06
FALSE		High	Unambiguous	LTALMDKFDLIGDVR	[R].LTALMDKFDLIGDVR.[G]			3.21775e-06	5.33751e-05	2.126	1	1	5	731344700	731344700 [387-401]			PREDICTED: alanine--glyoxylate aminotransferase 2 homolog 3, mitochondrial [Beta vulgaris subsp. vulgaris]	731344700	1	1706.91	15	8.6	53.9		120.9	61.6	404.1	63	141.2	58.7	88.1	77888	996477		1.13549e+06	221712	6.14645e+06	491126	1.55056e+06	790453	1.14214e+06	158289	996477		2.23273e+06	1.13744e+06		7.46558e+06
FALSE		High	Unambiguous	ITDGALVVVDCIEGVCVQTETVLR	[R].ITDGALVVVDCIEGVCVQTETVLR.[Q]	2xCarbamidomethyl [C11; C16]	2xCarbamidomethyl [C11; C16]	1.73313e-08	5.33751e-05	3.25	1	2	14	731362937	731362937 [121-144]			PREDICTED: elongation factor 2 [Beta vulgaris subsp. vulgaris]	731362937; 733214592	0	2646.35	24	52.4	366.4	159.3	53.4	1.9	46.2	60.4	138.7	94.1	27.3	3.05603e+06	43419175	1.16702e+07	3.22098e+06	43279.5	4.50746e+06	3.01848e+06	9768988	8.12546e+06	2.2673e+06	6.21065e+06	43419175	1.88737e+07	6.33346e+06	222035		5.47484e+06
FALSE		High	Unambiguous	LTDFGVQGADAK	[K].LTDFGVQGADAK.[N]			1.13406e-05	5.33751e-05	1.854	1	1	25	731345172	731345172 [129-140]			PREDICTED: monodehydroascorbate reductase [Beta vulgaris subsp. vulgaris]	731345172	0	1221.61	12	66.1	42.7	5.4	60.9	48.1	162.2	153.6	93	154.1	214.1	9.82731e+06	1.29156e+07	1.00456e+06	9.35692e+06	2.83226e+06	40368883	1.95959e+07	1.67082e+07	3.39665e+07	4.54238e+07	1.99717e+07	1.29156e+07	1.62464e+06	1.83987e+07	1.45302e+07		4.90327e+07
FALSE		High	Unambiguous	ITDFGDFYSSSENFQHLLPR	[K].ITDFGDFYSSSENFQHLLPR.[I]			5.75053e-08	5.33751e-05	2.992	1	1	13	731317825	731317825 [108-127]			PREDICTED: spermidine hydroxycinnamoyl transferase [Beta vulgaris subsp. vulgaris]	731317825	0	2373.11	20	39.1	135.9	232	76.1	126.8	152.3	49.6	83.8	50.9	53.4	1.71855e+06	1.21544e+07	1.28294e+07	3.46223e+06	2.21094e+06	1.12169e+07	1.87066e+06	4.45463e+06	3.31893e+06	3.35452e+06	3.49255e+06	1.21544e+07	2.07484e+07	6.80784e+06	1.13427e+07		1.36243e+07
FALSE		High	Unambiguous	ITDEFTGKGSVGK	[K].ITDEFTGKGSVGK.[V]			1.79247e-06	5.33751e-05	2.252	1	1	27	731341013	731341013 [72-84]			PREDICTED: ATP synthase subunit beta, mitochondrial [Beta vulgaris subsp. vulgaris]	731341013	1	1338.69	13	135	214.7	59.2	65	54.8	91.2	87.2	111.9	114.2	66.7	1.77963e+07	5.75261e+07	9805656	8.86008e+06	2.86086e+06	2.01127e+07	9.86102e+06	1.78137e+07	2.23116e+07	1.25412e+07	3.61668e+07	5.75261e+07	1.58583e+07	1.74217e+07	1.4677e+07		2.44292e+07
FALSE		High	Unambiguous	LTAYQVLSHPWIVDDSNVPDKPLDSAVLSR	[R].LTAYQVLSHPWIVDDSNVPDKPLDSAVLSR.[L]			7.43686e-09	5.33751e-05	3.432	1	1	7	731326940	731326940 [276-305]			PREDICTED: calcium-dependent protein kinase SK5 [Beta vulgaris subsp. vulgaris]	731326940	0	3335.73	30	192.8	52.5	213.7	104.3		143.5	82.3	68.1	77.1	65.7	5.6507e+06	3.12643e+06	7870065	3.15956e+06		7.0341e+06	2.0679e+06	2.41075e+06	3.34882e+06	2.74451e+06	1.14837e+07	3.12643e+06	1.27279e+07	6.2127e+06			8.54373e+06
FALSE		High	Unambiguous	LTASAAVGVEVDPEPFGREAK	[K].LTASAAVGVEVDPEPFGREAK.[H]			1.45032e-07	5.33751e-05	2.793	1	1	1	731342073	731342073 [254-274]			PREDICTED: ribonuclease TUDOR 2 [Beta vulgaris subsp. vulgaris]	731342073	1	2143.1	21	791.3	148		60.7							5404477	2.05392e+06		428455							1.09833e+07	2.05392e+06		842479
FALSE		High	Unambiguous	LTASAAVGVEVDPEPFGR	[K].LTASAAVGVEVDPEPFGR.[E]			1.10819e-05	5.33751e-05	1.859	1	1	5	731342073	731342073 [254-271]			PREDICTED: ribonuclease TUDOR 2 [Beta vulgaris subsp. vulgaris]	731342073	0	1814.93	18	833.9	35.8	44.8		85.5						4.46676e+06	389526	301205		181471						9.07763e+06	389526	487127		930993
FALSE		High	Unambiguous	LTAQEVLDHPWLQNIK	[R].LTAQEVLDHPWLQNIK.[K]			2.22848e-05	5.33751e-05	1.707	1	1	2	731325699	731325699 [300-315]			PREDICTED: calcium-dependent protein kinase 8 [Beta vulgaris subsp. vulgaris]	731325699	0	1905.02	16		137.5			343	357.1	47.9		66.2	48.4		1596177			776355	3.41373e+06	234524		560240	394867		1596177			3.98291e+06		4.14637e+06
FALSE		High	Unambiguous	ITANQNLILCDIR	[R].ITANQNLILCDIR.[R]	1xCarbamidomethyl [C10]	1xCarbamidomethyl [C10]	1.46123e-05	5.33751e-05	1.799	1	1	10	731325703	731325703 [454-466]			PREDICTED: sulfite reductase 1 [ferredoxin], chloroplastic [Beta vulgaris subsp. vulgaris]	731325703	0	1543.83	13	23.6	137.6	50.1	32.5	38.7	125.3	153.3	160.3	139.5	139.1	322879	3830778	861770	460183	210116	2872292	1.80121e+06	2.65274e+06	2.8302e+06	2.71756e+06	656175	3830778	1.39371e+06	904866	1.07795e+06		3.48873e+06
FALSE		High	Unambiguous	ITDFGVSAIVASTSAQANTK	[K].ITDFGVSAIVASTSAQANTK.[I]			1.48838e-05	5.33751e-05	1.795	1	1	1	731369438	731369438 [207-226]			PREDICTED: mitogen-activated protein kinase kinase 2 [Beta vulgaris subsp. vulgaris]	731369438	0	1981.02	20					102.8	161.6	126.6	250.1	184.3	174.6					108273	718636	288479	803196	725720	662125					555470		872867
FALSE		High	Unambiguous	ITEGNEPCFFTTYFSWEPAK	[R].ITEGNEPCFFTTYFSWEPAK.[A]	1xCarbamidomethyl [C8]	1xCarbamidomethyl [C8]	2.79895e-05	5.33751e-05	1.657	1	2	10	731324218	731324218 [705-724]			PREDICTED: villin-3 isoform X1 [Beta vulgaris subsp. vulgaris]	731324218; 731324222	0	2424.09	20		188	122	170.3	50.7	180.1	52.7	49.9	90.8	95.4		8799854	3.53198e+06	4.05475e+06	463106	6.94129e+06	1.04076e+06	1.38995e+06	3.10036e+06	3.13438e+06		8799854	5.71212e+06	7.97292e+06	2.37586e+06		8.43101e+06
FALSE		High	Unambiguous	ISVTGAGGFIGSHIAR	[R].ISVTGAGGFIGSHIAR.[R]			2.22768e-08	5.33751e-05	3.196	1	1	32	731328025	731328025 [30-45]			PREDICTED: GDP-mannose 3,5-epimerase 2 [Beta vulgaris subsp. vulgaris]	731328025	0	1542.84	16	108	75.2	208.9	92.7	166.9	28.9	29.1	119.3	79.2	91.8	9.36011e+06	1.32574e+07	2.27613e+07	8.30652e+06	5.73223e+06	4.19673e+06	2.16102e+06	1.24922e+07	1.01798e+07	1.13555e+07	1.90222e+07	1.32574e+07	3.68109e+07	1.63333e+07	2.94079e+07		5.09741e+06
FALSE		High	Unambiguous	ISVNDLVIKAAALALK	[R].ISVNDLVIKAAALALK.[K]			1.12635e-06	5.33751e-05	2.352	1	2	3	731361346	731361346 [374-389]			PREDICTED: dihydrolipoyllysine-residue acetyltransferase component 2 of pyruvate dehydrogenase complex, mitochondrial isoform X1 [Beta vulgaris subsp. vulgaris]	731361348; 731361346	1	1639.02	16	167.2	248.9		142.8			161.8	89.6	106.8	82.9	380820	1.15198e+06		336140			315968	246633	360365	269343	773927	1.15198e+06		660957
FALSE		High	Unambiguous	LSTEGVVIHWHGIR	[K].LSTEGVVIHWHGIR.[Q]			1.89522e-06	5.33751e-05	2.24	1	1	14	731355863	731355863 [87-100]			PREDICTED: L-ascorbate oxidase-like [Beta vulgaris subsp. vulgaris]	731355863	0	1603.87	14	0.4	63.2	191.2	53.2	64.9	204.1	48.7	210.3	49.9	114.1	84813.5	2.44548e+07	4.5773e+07	1.04802e+07	4.8975e+06	6.50757e+07	7.95262e+06	4.83961e+07	1.40847e+07	3.10136e+07	172363	2.44548e+07	7.40268e+07	2.06075e+07	2.51255e+07		7.90421e+07
FALSE		High	Unambiguous	LSTEDVEYLLMK	[K].LSTEDVEYLLMK.[S]			2.09986e-05	5.33751e-05	1.72	1	1	6	731332947	731332947 [311-322]			PREDICTED: 26S proteasome non-ATPase regulatory subunit 13 homolog B [Beta vulgaris subsp. vulgaris]	731332947	0	1440.73	12	143.6	88.5	54	332.5	126.1		36	86.7	62.7	69.9	2308899	2.89196e+06	1.0899e+06	5524026	802910		496626	1.68272e+06	1.49325e+06	1.60383e+06	4.69229e+06	2.89196e+06	1.76265e+06	1.0862e+07	4.11914e+06
FALSE		High	Unambiguous	LSTDPTTAAQLVAKEPATFTGSEVR	[K].LSTDPTTAAQLVAKEPATFTGSEVR.[M]			1.36297e-09	5.33751e-05	3.797	1	1	24	731363369	731363369 [294-318]			PREDICTED: probable mitochondrial-processing peptidase subunit beta, mitochondrial [Beta vulgaris subsp. vulgaris]	731363369	1	2590.34	25	276	127.5	1.4	28.4	100.1	79.1	96.5	60.5	74.8	155.6	2.17614e+07	2.04224e+07	141724	2.31404e+06	3.12764e+06	1.04379e+07	6.52746e+06	5.7631e+06	8.73472e+06	1.74934e+07	4.4225e+07	2.04224e+07	229204	4.55014e+06	1.60456e+07		1.26781e+07
FALSE		High	Unambiguous	ISTDEGVEVVMEHEAEAYPFTSER	[K].ISTDEGVEVVMEHEAEAYPFTSER.[I]			2.96917e-05	5.33751e-05	1.644	1	1	5	731342734	731342734 [135-158]			PREDICTED: probable nucleoredoxin 1 [Beta vulgaris subsp. vulgaris]	731342734	0	2725.23	24		31.8	115.6	612.7		67.4	86.8	24	22.7	39.1		1.26912e+06	2.85452e+06	12445804		2.21696e+06	1.46283e+06	568878	660233	1.09668e+06		1.26912e+06	4.6165e+06	2.44724e+07			2.69276e+06
FALSE		High	Unambiguous	LSTAPNSASLNYKLDMLKELSNAK	[R].LSTAPNSASLNYKLDMLKELSNAK.[K]			2.7352e-06	5.33751e-05	2.161	1	1	1	731344518	731344518 [518-541]			PREDICTED: acetyl-coenzyme A carboxylase carboxyl transferase subunit alpha, chloroplastic [Beta vulgaris subsp. vulgaris]	731344518	2	2608.37	24	972								28		3191328								135965		6.48562e+06
FALSE		High	Unambiguous	LSTAPNSASLNYK	[R].LSTAPNSASLNYK.[L]			2.14845e-05	5.33751e-05	1.715	1	1	1	731344518	731344518 [518-530]			PREDICTED: acetyl-coenzyme A carboxylase carboxyl transferase subunit alpha, chloroplastic [Beta vulgaris subsp. vulgaris]	731344518	0	1365.7	13				47.1				47.5	198.5	706.8				128088				151053	773610	2651206				251861
FALSE		High	Unambiguous	LSSVPHEVYIYPGSGHAFMNMSPEGIER	[K].LSSVPHEVYIYPGSGHAFMNMSPEGIER.[R]			1.13687e-06	5.33751e-05	2.35	1	1	6	731359644	731359644 [220-247]			PREDICTED: uncharacterized protein LOC104904727 [Beta vulgaris subsp. vulgaris]	731359644	0	3104.46	28	164.6	80.3		166.7	571.2			0.6	16.5		3866627	3835677		4.04855e+06	5.31615e+06			15854.1	575910		7.858e+06	3835677		7.96073e+06	2.72733e+07
FALSE		High	Unambiguous	ISSVNAMSALCEATGADVTQVSHAVGKDTR	[R].ISSVNAMSALCEATGADVTQVSHAVGKDTR.[I]	1xCarbamidomethyl [C11]	1xCarbamidomethyl [C11]	3.64633e-08	5.33751e-05	3.09	1	1	7	731347914	731347914 [228-257]			PREDICTED: UDP-glucose 6-dehydrogenase 5 [Beta vulgaris subsp. vulgaris]	731347914	1	3075.48	30		331.9		259.8	16.6	63.8	174.8	35.6	87.7	29.9		1.73595e+07		6.91072e+06	168818	2.7494e+06	3.85848e+06	1106166	3.34455e+06	1.0979e+06		1.73595e+07		1.35887e+07	866079		3.33947e+06
FALSE		High	Unambiguous	ISTHAVDVLTSMAVPLELSDRDSLVK	[K].ISTHAVDVLTSMAVPLELSDRDSLVK.[S]			8.2377e-09	5.33751e-05	3.41	1	1	28	731367520	731367520 [134-159]			PREDICTED: T-complex protein 1 subunit delta [Beta vulgaris subsp. vulgaris]	731367520	1	2796.48	26	226.3	163.5	155.8	48.2	11.1	96.3	88.3	79.8	99.2	31.4	2.22068e+07	32614085	1.92153e+07	4.88995e+06	432290	1.58195e+07	7.43153e+06	9.46001e+06	1.44267e+07	4.39393e+06	4.513e+07	32614085	3.10762e+07	9.61519e+06	2.21776e+06		1.92146e+07
FALSE		High	Unambiguous	ISSVNAMSALCEATGADVTEVSYAVGKDSR	[R].ISSVNAMSALCEATGADVTEVSYAVGKDSR.[I]	1xCarbamidomethyl [C11]	1xCarbamidomethyl [C11]	3.69666e-11	5.33751e-05	4.573	1	1	16	1108977069	1108977069 [227-256]			PREDICTED: UDP-glucose 6-dehydrogenase 1 [Beta vulgaris subsp. vulgaris]	1108977069	1	3088.46	30	13.2	172.1	54.2	175.4	32.3	50.3	61.9	239.6	147.5	53.4	1.02947e+06	2.7191e+07	5.29048e+06	1.40916e+07	993722	6547206	4.12554e+06	2.25044e+07	16989741	5.92432e+06	2.09216e+06	2.7191e+07	8.55607e+06	2.77086e+07	5.09806e+06		7.95234e+06
FALSE		High	Unambiguous	LSSVLTPSKTDDSPSLTK	[R].LSSVLTPSKTDDSPSLTK.[I]			7.80207e-05	5.33751e-05	1.426	1	1	2	731324490	731324490 [15-32]			PREDICTED: pyruvate kinase 2, cytosolic [Beta vulgaris subsp. vulgaris]	731324490	1	1875.99	18			150.7	16.9	15.8	198.9	202.9	67.2	194.6	153			1.43148e+06	132013	47183.8	2.51597e+06	1.31569e+06	613821	2.1804e+06	1.65032e+06			2.31508e+06	259580	242066		3.05594e+06
FALSE		High	Unambiguous	LSSTDSQAARDALLESGMADALMASADQR	[R].LSSTDSQAARDALLESGMADALMASADQR.[G]			1.00115e-05	5.33751e-05	1.881	1	1	2	731334924	731334924 [91-119]			PREDICTED: vesicle transport v-SNARE 13 [Beta vulgaris subsp. vulgaris]	731334924	1	2981.39	29	222.8	224.6		218.5	36.5			297.6			950810	1.94829e+06		963926	61783.1			1.53439e+06			1.9323e+06	1.94829e+06		1.89538e+06	316964
FALSE		High	Unambiguous	LSSSPCVLASGK	[R].LSSSPCVLASGK.[F]	1xCarbamidomethyl [C6]	1xCarbamidomethyl [C6]	2.18811e-05	5.33751e-05	1.711	1	1	3	731371136	731371136 [646-657]			PREDICTED: heat shock protein 90-6, mitochondrial [Beta vulgaris subsp. vulgaris]	731371136	0	1205.62	12	51.1	72.6	75.6	4.3	19.7	141.6	152.7	126.6	139.3	216.5	1.05899e+06	3.05534e+06	1.96766e+06	91544.3	161760	4.90671e+06	2.71081e+06	3.1659e+06	4.27294e+06	6.39423e+06	2.15215e+06	3.05534e+06	3.18222e+06	180005	829874		5.95978e+06
FALSE		High	Unambiguous	LSSSILSHDSFNNDAISGFTFK	[K].LSSSILSHDSFNNDAISGFTFK.[Y]			6.57181e-06	5.33751e-05	1.972	1	1	12	731359796	731359796 [91-112]			PREDICTED: GATA zinc finger domain-containing protein 10 [Beta vulgaris subsp. vulgaris]	731359796	0	2387.15	22	133.5	126		37.8	207.6	57.9	45.1	148	122	122	5.21142e+06	10001042		1.52719e+06	3.21157e+06	3.78166e+06	1.5093e+06	6.98012e+06	7.05957e+06	6.79456e+06	1.0591e+07	10001042		3.00293e+06	1.64762e+07		4.59327e+06
FALSE		High	Unambiguous	LSSSIEGLSLLK	[K].LSSSIEGLSLLK.[A]			1.37634e-05	5.33751e-05	1.812	1	1	19	731366487	731366487 [151-162]			PREDICTED: uricase-2 isozyme 2 [Beta vulgaris subsp. vulgaris]	731366487	0	1246.73	12	161.5	198.3	2.6	44.4	85.9	119	18.7	131.3	121.2	117.1	6.1735e+06	1.54027e+07	126324	1.75198e+06	1.30033e+06	7.61249e+06	611465	6.06108e+06	6865617	6.3854e+06	1.25462e+07	1.54027e+07	204299	3.44495e+06	6.67105e+06		9.24626e+06
FALSE		High	Unambiguous	ISSQDVDENICKFAK	[K].ISSQDVDENICKFAK.[K]	1xCarbamidomethyl [C11]	1xCarbamidomethyl [C11]	2.97359e-06	5.33751e-05	2.143	1	1	1	731344894	731344894 [28-42]			PREDICTED: 40S ribosomal protein S13 [Beta vulgaris subsp. vulgaris]	731344894	1	1753.84	15					826.6	5.6	7.8	136.1		23.8					1.23064e+06	35465.4	25242.8	618015		127820					6.31349e+06		43076.8
FALSE		High	Unambiguous	ISSQDVDENICK	[K].ISSQDVDENICK.[F]	1xCarbamidomethyl [C11]	1xCarbamidomethyl [C11]	8.71536e-06	5.33751e-05	1.911	1	1	20	731344894	731344894 [28-39]			PREDICTED: 40S ribosomal protein S13 [Beta vulgaris subsp. vulgaris]	731344894	0	1407.64	12	58.3	143.4	64.8	68.8	84.4	132.3	131	68.7	74.3	174	7.12198e+06	3.5601e+07	9.95291e+06	8.6815e+06	4.08196e+06	2.70401e+07	1.37248e+07	1.01458e+07	1.34555e+07	3.03117e+07	1.44737e+07	3.5601e+07	1.60964e+07	1.70706e+07	2.09416e+07		3.28433e+07
FALSE		High	Unambiguous	ISSQDVDDNICKFAK	[K].ISSQDVDDNICKFAK.[K]	1xCarbamidomethyl [C11]	1xCarbamidomethyl [C11]	3.87586e-05	5.33751e-05	1.585	1	1	6	731318339	731318339 [28-42]			PREDICTED: 40S ribosomal protein S13 [Beta vulgaris subsp. vulgaris]	731318339	1	1739.83	15		39.2	8.1	89.6	97.1	116.9	168.7	77.8	155.8	246.8		4.35863e+06	558052	5.06193e+06	2.10244e+06	1.06929e+07	7.9129e+06	5.14058e+06	12626439	1.92508e+07		4.35863e+06	902514	9.95335e+06	1.07861e+07		1.29878e+07
FALSE		High	Unambiguous	ISSVNAMSALCEATGADVTEVSYAVGK	[R].ISSVNAMSALCEATGADVTEVSYAVGK.[D]	1xCarbamidomethyl [C11]	1xCarbamidomethyl [C11]	1.80081e-06	5.33751e-05	2.251	1	1	8	1108977069	1108977069 [227-253]			PREDICTED: UDP-glucose 6-dehydrogenase 1 [Beta vulgaris subsp. vulgaris]	1108977069	0	2730.3	27		196.1		123.3	5.9	15.8	15.6	384.5	193.1	65.8		6085657		1.94644e+06	35694.5	402461	203954	7.09147e+06	4.36786e+06	1.43274e+06		6085657		3.82731e+06	183122		488836
FALSE		High	Unambiguous	ISVQQEDATKIEYR	[R].ISVQQEDATKIEYR.[V]			4.16609e-07	5.33751e-05	2.566	2	2	22	731322006; 731325715	731322006 [116-129]; 731325715 [104-117]			PREDICTED: probable mediator of RNA polymerase II transcription subunit 36b [Beta vulgaris subsp. vulgaris] PREDICTED: mediator of RNA polymerase II transcription subunit 36a [Beta vulgaris subsp. vulgaris]	731322006; 731325715	1	1679.86	14	226.3	193.6	76.4	107.2	66	41.7	52.4	89.6	62	84.9	2.6279e+07	4.56767e+07	11141355	1.28641e+07	3.03621e+06	8.1057e+06	5.21317e+06	1.25663e+07	1.0663e+07	1.40596e+07	5.34059e+07	4.56767e+07	1.80185e+07	2.5295e+07	1.55766e+07		9.84532e+06
FALSE		High	Unambiguous	ISTHYNPYASTFDQPLSTR	[R].ISTHYNPYASTFDQPLSTR.[F]			5.1647e-06	5.33751e-05	2.024	1	2	1	731366759	731366759 [1158-1176]			PREDICTED: uncharacterized protein LOC104907915 isoform X1 [Beta vulgaris subsp. vulgaris]	731366759; 731366761	0	2198.05	19			749.7							250.3			1.34108e+06							508351			2.16888e+06
FALSE		High	Unambiguous	LSTIGYDACDLCGAK	[R].LSTIGYDACDLCGAK.[F]	2xCarbamidomethyl [C9; C12]	2xCarbamidomethyl [C9; C12]	4.31617e-05	5.33751e-05	1.561	1	1	3	731363294	731363294 [1579-1593]			PREDICTED: uncharacterized protein LOC104906319 [Beta vulgaris subsp. vulgaris]	731363294	0	1643.74	15		190		46.9	40.7	88.9	127.3	168.6	130.3	207.3		1.31367e+06		165005	54901.7	506254	371389	692795	656712	1.00579e+06		1.31367e+06		324453	281660		614904
FALSE		High	Unambiguous	ISVNDLVIK	[R].ISVNDLVIK.[A]			0.000119228	5.33751e-05	1.324	1	2	25	731361346	731361346 [374-382]			PREDICTED: dihydrolipoyllysine-residue acetyltransferase component 2 of pyruvate dehydrogenase complex, mitochondrial isoform X1 [Beta vulgaris subsp. vulgaris]	731361348; 731361346	0	1000.6	9	61.6	214.4	3.7	69.1	78.3	113.3	74.8	97.6	127.8	159.4	7.41056e+06	5.24457e+07	558552	8.59697e+06	3.73394e+06	2.28236e+07	7.71805e+06	1.41961e+07	2.27996e+07	2.73678e+07	1.50602e+07	5.24457e+07	903323	1.69044e+07	1.91561e+07		2.7722e+07
FALSE		High	Unambiguous	LSVISFASDADRK	[R].LSVISFASDADRK.[C]			4.45252e-06	5.33751e-05	2.056	1	1	16	731329875	731329875 [108-120]			PREDICTED: uncharacterized protein LOC104891771 [Beta vulgaris subsp. vulgaris]	731329875	1	1408.74	13	6.9	24.4	157.5	51.4	247.4	89.2	44.4	112.4	47.3	219.2	404487	2.9185e+06	1.16325e+07	3.1219e+06	5.76063e+06	8.77643e+06	2.24006e+06	7.98062e+06	4.12175e+06	1.83797e+07	822025	2.9185e+06	1.88127e+07	6.13865e+06	2.95536e+07		1.066e+07
FALSE		High	Unambiguous	LSVISFASDADR	[R].LSVISFASDADR.[K]			1.56562e-05	5.33751e-05	1.784	1	1	13	731329875	731329875 [108-119]			PREDICTED: uncharacterized protein LOC104891771 [Beta vulgaris subsp. vulgaris]	731329875	0	1280.65	12	110.5	43.1	125.8	114.2	101	111.4	73	97.4	83.5	140	6.57659e+06	5.2155e+06	9.4117e+06	7.02886e+06	2.38294e+06	1.10991e+07	3.7252e+06	7.00783e+06	7.36664e+06	1.189e+07	1.33654e+07	5.2155e+06	1.52212e+07	1.3821e+07	1.22251e+07		1.34812e+07
FALSE		High	Unambiguous	ISVIQAPLQGPGMSQR	[R].ISVIQAPLQGPGMSQR.[T]			2.57884e-05	5.33751e-05	1.675	1	1	13	731342327	731342327 [387-402]			PREDICTED: uncharacterized protein LOC104897211 [Beta vulgaris subsp. vulgaris]	731342327	0	1681.91	16	47.4	7.3		28.2	6.3	151.8	214.7	159	214.4	170.7	491743	154317		302459	26093.7	2.63663e+06	1.91067e+06	1.99373e+06	3.29735e+06	2.52753e+06	999351	154317		594730	133868		3.2025e+06
FALSE		High	Unambiguous	LSVIDHIPEIFSR	[R].LSVIDHIPEIFSR.[H]			2.49264e-06	5.33751e-05	2.181	1	1	10	731345094	731345094 [248-260]			PREDICTED: uncharacterized protein LOC104898374 [Beta vulgaris subsp. vulgaris]	731345094	0	1525.84	13	45.5	61.9	94	129.5	148.1	267.3	34.6	89.1	62	67.9	1.64102e+06	4.53648e+06	4.25794e+06	4.82294e+06	2.11448e+06	1.61155e+07	1.06882e+06	3.87826e+06	3.30866e+06	3.49168e+06	3.33499e+06	4.53648e+06	6.88619e+06	9.48343e+06	1.08478e+07		1.95741e+07
FALSE		High	Unambiguous	LSVGYSLDQIPNDITR	[K].LSVGYSLDQIPNDITR.[K]			3.72632e-07	5.33751e-05	2.59	1	1	15	731361443	731361443 [414-429]			PREDICTED: carbamoyl-phosphate synthase large chain, chloroplastic [Beta vulgaris subsp. vulgaris]	731361443	0	1790.93	16	667.5	47.7	83.5	45.6	43.5	5.2	17.1	28.2	30.6	31.2	7.92135e+07	1.1496e+07	12450443	5.5893e+06	2.04409e+06	1.03026e+06	1.74158e+06	4.04592e+06	5.38405e+06	5.27444e+06	1.60983e+08	1.1496e+07	2.01356e+07	1.09903e+07	1.04867e+07		1.25137e+06
FALSE		High	Unambiguous	ISVGYALLPNKVESFIR	[R].ISVGYALLPNKVESFIR.[S]			5.01736e-07	5.33751e-05	2.526	1	1	32	731320962	731320962 [11-27]			PREDICTED: inositol-tetrakisphosphate 1-kinase 1 [Beta vulgaris subsp. vulgaris]	731320962	1	1906.08	17	85.4	74.8	96.5	108.4	83.5	183	74.5	93.6	86.2	114	1.05056e+07	1.87043e+07	1.49236e+07	1.3788e+07	4.06868e+06	3.76738e+07	7.85965e+06	1.39055e+07	1.57091e+07	2.00071e+07	2.13501e+07	1.87043e+07	2.41353e+07	2.71116e+07	2.08734e+07		4.57592e+07
FALSE		High	Unambiguous	ISVGTPDEARHPDTLRSGLAEFISTLIFVFAGQGSGMAFAK	[R].ISVGTPDEARHPDTLRSGLAEFISTLIFVFAGQGSGMAFAK.[L]			3.37052e-05	5.33751e-05	1.616	1	1	2	731368735	731368735 [6-46]			PREDICTED: probable aquaporin TIP1-2 [Beta vulgaris subsp. vulgaris]	731368735	2	4294.2	41		63.8	278.6	274.7	155.5		124.7	57.6		45.1		237755	641546	520364	112888		196023	127439		117891		237755	1.03755e+06	1.0232e+06	579145
FALSE		High	Unambiguous	LSTIDGYTVLHTNIYNALVAEFTSK	[K].LSTIDGYTVLHTNIYNALVAEFTSK.[A]			5.08781e-07	5.33751e-05	2.523	1	1	11	731357287	731357287 [303-327]			PREDICTED: basic 7S globulin [Beta vulgaris subsp. vulgaris]	731357287	0	2770.43	25	76.1	135	193.2	15		76.2	162.1	86.6	192.4	63.5	4.61094e+06	1.66157e+07	1.47035e+07	940627		7.72303e+06	8.42292e+06	6.33395e+06	1.72679e+07	5.48484e+06	9.37063e+06	1.66157e+07	2.37794e+07	1.84957e+06			9.38052e+06
FALSE		High	Unambiguous	ISVGTPDEARHPDTLR	[R].ISVGTPDEARHPDTLR.[S]			2.91575e-05	5.33751e-05	1.648	1	1	11	731368735	731368735 [6-21]			PREDICTED: probable aquaporin TIP1-2 [Beta vulgaris subsp. vulgaris]	731368735	1	1763.9	16	25.2	122.5	347.5	127.3	118.4	37.8	12.5	73.8	65.4	69.6	5.81637e+06	5.75151e+07	1.00857e+08	3.03931e+07	1.08294e+07	1.46138e+07	2.47874e+06	2.05988e+07	2.23771e+07	2.29425e+07	1.18204e+07	5.75151e+07	1.63111e+08	5.97626e+07	5.55575e+07		1.77502e+07
FALSE		High	Unambiguous	ISVGIEDVNDLIADLDHALK	[R].ISVGIEDVNDLIADLDHALK.[T]			3.52617e-05	5.33751e-05	1.606	1	2	3	731324482	731324482 [436-455]			PREDICTED: cystathionine beta-lyase, chloroplastic isoform X1 [Beta vulgaris subsp. vulgaris]	731324484; 731324482	0	2150.13	20	125.8		146.6	145.7	241.5	104.4	21.7	52.5	114.2	47.6	1.28544e+06		1.88208e+06	1.5385e+06	977385	1.78456e+06	190147	648582	1.72966e+06	694175	2.61234e+06		3.04382e+06	3.02517e+06	5.01425e+06		2.16756e+06
FALSE		High	Unambiguous	LSVDRNLIEVFAK	[K].LSVDRNLIEVFAK.[G]			2.92902e-05	5.33751e-05	1.647	1	1	54	731354199	731354199 [342-354]			PREDICTED: plasma membrane ATPase 4 [Beta vulgaris subsp. vulgaris]	731354199	1	1503.85	13	101.1	88.8	31.5	129.7	162.2	116.3	69.6	94.1	87.8	119	1.95327e+07	3.48625e+07	7.64863e+06	2.59005e+07	1.24092e+07	3.75806e+07	11524124	2.19519e+07	2.51322e+07	3.27765e+07	3.96956e+07	3.48625e+07	1.23698e+07	5.09285e+07	6.36626e+07		4.5646e+07
FALSE		High	Unambiguous	ISVDASLAGAIIGK	[K].ISVDASLAGAIIGK.[S]			4.05805e-06	5.33751e-05	2.076	1	1	8	731323870	731323870 [169-182]			PREDICTED: zinc finger CCCH domain-containing protein 14 [Beta vulgaris subsp. vulgaris]	731323870	0	1314.76	14	614.4	179.8		34.3	6.4	4	12.5	68.2	35.6	44.7	1.56237e+07	9.29056e+06		902611	64089.9	171370	271652	2.09549e+06	1.34173e+06	1.62258e+06	3.17515e+07	9.29056e+06		1.77482e+06	328798		208149
FALSE		High	Unambiguous	LSTWEKPFELMTPIER	[R].LSTWEKPFELMTPIER.[A]			5.63319e-05	5.33751e-05	1.501	1	1	2	731359936	731359936 [238-253]			PREDICTED: pre-mRNA-processing protein 40A [Beta vulgaris subsp. vulgaris]	731359936	0	1977.02	16	278.5			479		125.1				117.4	762589			1.35549e+06		573236				458333	1.54978e+06			2.66532e+06			696262
FALSE		High	Unambiguous	LSTMTADEYFEKHPELR	[K].LSTMTADEYFEKHPELR.[K]	1xOxidation [M4]	1xOxidation [M4]	1.7432e-06	5.33751e-05	2.258	1	1	3	731371373	731371373 [138-154]			PREDICTED: ATP synthase subunit d, mitochondrial [Beta vulgaris subsp. vulgaris]	731371373	1	2082.98	17									21	979									137748	6196868
FALSE		High	Unambiguous	LSTMTADEYFEKHPELR	[K].LSTMTADEYFEKHPELR.[K]			1.80718e-08	5.33751e-05	3.241	1	1	80	731371373	731371373 [138-154]			PREDICTED: ATP synthase subunit d, mitochondrial [Beta vulgaris subsp. vulgaris]	731371373	1	2066.99	17	59.8	66.9	49	157.3	244.8	79.4	92.4	82.1	96.6	71.6	1.71158e+07	3.89434e+07	1.7624e+07	4.65592e+07	2.77629e+07	3.80489e+07	2.26964e+07	2.84131e+07	4.09642e+07	2.92447e+07	3.47838e+07	3.89434e+07	2.85026e+07	9.15502e+07	1.42431e+08		4.62148e+07
FALSE		High	Unambiguous	LSTLNCFLDFAGHLER	[R].LSTLNCFLDFAGHLER.[I]	1xCarbamidomethyl [C6]	1xCarbamidomethyl [C6]	9.76925e-08	5.33751e-05	2.878	1	1	2	731313512	731313512 [733-748]			PREDICTED: exocyst complex component SEC5A [Beta vulgaris subsp. vulgaris]	731313512	0	1892.93	16		127.6			23.7		167	42.1	208.6	431		694010			25098.2		383441	136225	827349	1.64596e+06		694010			128760
FALSE		High	Unambiguous	LSTLLEERGEAYANSSIR	[R].LSTLLEERGEAYANSSIR.[V]			1.3883e-06	5.33751e-05	2.307	1	1	12	1108944454	1108944454 [239-256]			PREDICTED: shikimate kinase, chloroplastic [Beta vulgaris subsp. vulgaris]	1108944454	1	2009.03	18	87.7	40.6	263.5	109.7	320.9	0.6	6.4	64.7	29.6	76.4	2.68359e+06	2.52736e+06	1.01315e+07	3.46904e+06	3.88995e+06	29161.8	168292	2.39019e+06	1.34284e+06	3.33474e+06	5.45375e+06	2.52736e+06	1.63853e+07	6.82123e+06	1.99565e+07		35420.3
FALSE		High	Unambiguous	ISVGIEDVNDLIADLDHALKTGPV	[R].ISVGIEDVNDLIADLDHALKTGPV.[-]			1.23031e-06	5.33751e-05	2.333	1	2	3	731324482	731324482 [436-459]			PREDICTED: cystathionine beta-lyase, chloroplastic isoform X1 [Beta vulgaris subsp. vulgaris]	731324484; 731324482	1	2504.32	24	553.7	33.2		29.1	243.5		52.4	8.4	79.7		9.12945e+06	1.11371e+06		496171	1.59039e+06		741051	167705	1.94593e+06		1.85534e+07	1.11371e+06		975629	8.15912e+06
[truncated: 33,398 more rows]
[truncated: 106 more columns]

## Sheet: Control 3-5 Sample 3-5
Checked	Sequence	Modifications (all possible sites)	Qvality PEP	Qvality q-value	SVM_Score	# Protein Groups	# Proteins	# PSMs	Master Protein Accessions	Master Protein Descriptions	Protein Accessions	Theo. MH+ [Da]	Sequence Length	Abundances (Normalized): F1: Control	Abundances (Normalized): F2: Control	Abundances (Normalized): F3: Control	Abundances (Normalized): F4: Control	Abundances (Normalized): F5: Control	分割线	Abundances (Normalized): F6: Sample	Abundances (Normalized): F7: Sample	Abundances (Normalized): F8: Sample	Abundances (Normalized): F9: Sample	Abundances (Normalized): F10: Sample	分割线	Control	Sample	Fold Change	P-value	Abundances Count: F1: Control	Abundances Count: F2: Control	Abundances Count: F3: Control	Abundances Count: F4: Control	Abundances Count: F5: Control	Abundances Count: F6: Sample	Abundances Count: F7: Sample	Abundances Count: F8: Sample	Abundances Count: F9: Sample	Abundances Count: F10: Sample	Quan Info	Found in File: [F1]	Found in File: [F2]	Found in File: [F3]	Found in File: [F4]	Found in File: [F5]	Found in File: [F6]	Found in File: [F7]	Found in File: [F8]	Found in File: [F9]
[truncated: 482 more rows]
[truncated: 77 more columns]
