# Supplementary material for: Comparative Ubiquitination Proteomics Revealed the Salt Tolerance Mechanism in Sugar Beet Monomeric Additional Line M14
Source: Int J Mol Sci. 2022 Dec 17;23(24):16088. doi: 10.3390/ijms232416088 (PMC9782053; doi:10.3390/ijms232416088)
Supplement: Supplementary file 1 [file ijms-23-16088-s001.zip › Table S5 Differential expression of ubiquitinated proteins in the roots of sugar beet M14 line under 400 mM NaCl stress.xlsx]

## Sheet: PeptideGroups
Checked	Tags	Confidence	PSM Ambiguity	Sequence	Annotated Sequence	Modifications	Modifications (all possible sites)	Qvality PEP	Qvality q-value	SVM_Score	# Protein Groups	# Proteins	# PSMs	Master Protein Accessions	Positions in Master Proteins	Modifications in Master Proteins (all Sites)	Modifications in Master Proteins	Master Protein Descriptions	Protein Accessions	# Missed Cleavages	Theo. MH+ [Da]	Sequence Length	Abundances (Scaled): F1: Control	Abundances (Scaled): F2: Control	Abundances (Scaled): F3: Control	Abundances (Scaled): F4: Control	Abundances (Scaled): F5: Control	Abundances (Scaled): F6: Sample	Abundances (Scaled): F7: Sample	Abundances (Scaled): F8: Sample	Abundances (Scaled): F9: Sample	Abundances (Scaled): F10: Sample	Abundance: F1: Control	Abundance: F2: Control	Abundance: F3: Control	Abundance: F4: Control	Abundance: F5: Control	Abundance: F6: Sample	Abundance: F7: Sample	Abundance: F8: Sample	Abundance: F9: Sample	Abundance: F10: Sample	Abundances (Normalized): F1: Control	Abundances (Normalized): F2: Control	Abundances (Normalized): F3: Control	Abundances (Normalized): F4: Control	Abundances (Normalized): F5: Control		Abundances (Normalized): F6: Sample
FALSE		High	Unambiguous	AAAAAGLTVAEVTGSNVVSVAEDELMR	[K].AAAAAGLTVAEVTGSNVVSVAEDELMR.[I]			3.00012e-12	5.15092e-05	3.519	1	1	30	731366157	731366157 [141-167]			PREDICTED: formate dehydrogenase 1, mitochondrial [Beta vulgaris subsp. vulgaris]	731366157	0	2631.33	27	115.9	124.1	187.5	84.6	122.6	47.7	58.9	58.6	121.7	78.3	1.81843e+07	1.60243e+07	1.73604e+07	1.00812e+07	2.53319e+07	3.31253e+06	9.07998e+06	9.91543e+06	2.40961e+07	2.65365e+07	3.92504e+07	4.20512e+07	6.35293e+07	2.86443e+07	4.15352e+07		1.61497e+07
FALSE		High	Unambiguous	MSLLAEKQR	[R].MSLLAEKQR.[V]			0.000287952	5.15092e-05	1.093	2	2	2	731374752; 731335706	731374752 [346-354]; 731335706 [346-354]			PREDICTED: 60S ribosomal protein L4 [Beta vulgaris subsp. vulgaris] PREDICTED: 60S ribosomal protein L4 [Beta vulgaris subsp. vulgaris]	731374752; 731335706	1	1075.59	9		5	39.7	44.1	33.8	128.3	205.7	394.1	149.2			41327.5	234309	335686	446110	569246	2.02562e+06	4.25547e+06	1.88527e+06			108452	857441	953802	731461		2.77526e+06
FALSE		High	Unambiguous	MSLKEEFEKYAEK	[-].MSLKEEFEKYAEK.[V]	1xMet-loss+Acetyl [N-Term]	1xMet-loss+Acetyl [N-Term]	6.08713e-07	5.15092e-05	1.906	1	1	26	731332985	731332985 [1-13]	731332985 1xMet-loss+Acetyl [N-Term]	731332985 1xMet-loss+Acetyl [N-Term]	PREDICTED: acyl-CoA-binding protein [Beta vulgaris subsp. vulgaris]	731332985	2	1542.77	13	24.1	4.8	46.4	140.6	360.2	61.6	58.2	77.2	100.1	126.9	2.52741e+06	410852	2.86866e+06	1.12044e+07	49747744	2.86115e+06	5.99934e+06	8.73371e+06	1.32401e+07	2.87408e+07	5.45534e+06	1.07816e+06	1.04977e+07	3.18356e+07	8.15685e+07		1.3949e+07
FALSE		High	Unambiguous	MSLKEEFEK	[-].MSLKEEFEK.[Y]	1xMet-loss+Acetyl [N-Term]	1xMet-loss+Acetyl [N-Term]	0.000959785	5.15092e-05	0.934	1	1	11	731332985	731332985 [1-9]	731332985 1xMet-loss+Acetyl [N-Term]	731332985 1xMet-loss+Acetyl [N-Term]	PREDICTED: acyl-CoA-binding protein [Beta vulgaris subsp. vulgaris]	731332985	1	1051.53	9	50.6	29.6	315.3	334.7	1.3	132.9	18.1	60.3	35.1	22.1	1.98808e+06	957085	7.3088e+06	9.99174e+06	65873.9	2.3124e+06	697400	2.55356e+06	1.73848e+06	1.87541e+06	4.29123e+06	2.5116e+06	2.67461e+07	2.839e+07	108010		1.12737e+07
FALSE		High	Unambiguous	MSIGYSGTLEQR	[R].MSIGYSGTLEQR.[W]			0.00199911	5.15092e-05	0.837	1	1	1	731331903	731331903 [422-433]			PREDICTED: methionine gamma-lyase [Beta vulgaris subsp. vulgaris]	731331903	0	1341.65	12	15.6			101.4		100.9	239.8	25	91.6	425.7	29673.4			146965		85241.2	449551	51488.2	220280	1.75289e+06	64049.3			417580			415579
FALSE		High	Unambiguous	MSLGLPVAATVNCADNTGAK	[R].MSLGLPVAATVNCADNTGAK.[N]	1xCarbamidomethyl [C13]	1xCarbamidomethyl [C13]	1.30608e-09	5.15092e-05	2.717	1	1	20	731320688	731320688 [16-35]			PREDICTED: 60S ribosomal protein L23 [Beta vulgaris subsp. vulgaris]	731320688	0	1989.97	20	1.6	1.6	8.4	130.6	46.8	68.3	191.2	207	172.3	172.3	138392	110789	426631	8.58356e+06	5.32434e+06	2.61625e+06	1.62522e+07	1.92966e+07	1.87955e+07	3.21725e+07	298715	290734	1.56123e+06	2.43889e+07	8.73002e+06		1.27551e+07
FALSE		High	Unambiguous	MSLEGNKDDICEVNR	[-].MSLEGNKDDICEVNR.[N]	1xCarbamidomethyl [C11]; 1xMet-loss+Acetyl [N-Term]	1xCarbamidomethyl [C11]; 1xMet-loss+Acetyl [N-Term]	1.94124e-05	5.15092e-05	1.449	1	1	2	731359871	731359871 [1-15]	731359871 1xMet-loss+Acetyl [N-Term]	731359871 1xMet-loss+Acetyl [N-Term]	PREDICTED: proline iminopeptidase [Beta vulgaris subsp. vulgaris]	731359871	1	1690.77	15	52.4				18.8	56.8	255.2	161.4	235.5	220	73788				34844.8	35438.9	353227	244974	418425	668978	159270				57133		172776
FALSE		High	Unambiguous	MSLDEMIDIFAR	[K].MSLDEMIDIFAR.[N]			0.000523781	5.15092e-05	1.014	1	1	1	731318727	731318727 [172-183]			PREDICTED: peroxidase 63 [Beta vulgaris subsp. vulgaris]	731318727	0	1440.69	12							447.6		514.1	38.3							735236		1.08383e+06	138226
FALSE		High	Unambiguous	MSLLALEKPQMLTEGDGGSYASWNTTVFPYLGTAK	[K].MSLLALEKPQMLTEGDGGSYASWNTTVFPYLGTAK.[V]			5.30178e-10	5.15092e-05	2.836	1	1	22	731334959	731334959 [4-38]			PREDICTED: uncharacterized protein LOC104894026 [Beta vulgaris subsp. vulgaris]	731334959	0	3776.86	35	36.2	112.6	3.9	23.7	1.1	143.3	121.1	194.8	181.8	181.4	3.76345e+06	9621362	239705	1.87078e+06	149287	6.58957e+06	1.23542e+07	2.18083e+07	2.38147e+07	4.06584e+07	8.12331e+06	2.52485e+07	877187	5.31555e+06	244777		3.21263e+07
FALSE		High	Unambiguous	MSIASFYNPASDAVICPAPSLAEKDAEDQKQIYPK	[R].MSIASFYNPASDAVICPAPSLAEKDAEDQKQIYPK.[F]	1xCarbamidomethyl [C16]	1xCarbamidomethyl [C16]	5.85741e-08	5.15092e-05	2.215	1	1	3	731355006	731355006 [245-279]			PREDICTED: 1-aminocyclopropane-1-carboxylate oxidase 1 [Beta vulgaris subsp. vulgaris]	731355006	2	3854.86	35		85.2					16.7	838.1		59.9		447981					105015	5.77088e+06		826207		1.1756e+06
FALSE		High	Unambiguous	MSKLQGEAVREAISGIANDAK	[-].MSKLQGEAVREAISGIANDAK.[E]	1xMet-loss+Acetyl [N-Term]	1xMet-loss+Acetyl [N-Term]	5.81662e-07	5.15092e-05	1.912	1	1	2	731349468	731349468 [1-21]	731349468 1xMet-loss+Acetyl [N-Term]	731349468 1xMet-loss+Acetyl [N-Term]	PREDICTED: 60S ribosomal protein L10a [Beta vulgaris subsp. vulgaris]	731349468	2	2099.11	21				170.8		206.2	83.9	151.9	100.1	287.2				2.05353e+06		1.4448e+06	1.30524e+06	2.59089e+06	1.99925e+06	9.81246e+06				5.8348e+06			7.04389e+06
FALSE		High	Unambiguous	TAIEKACPGVVSCADILALAAR	[K].TAIEKACPGVVSCADILALAAR.[D]	2xCarbamidomethyl [C7; C13]; 1xGG [K5]	2xCarbamidomethyl [C7; C13]; 1xGG [K5]	0.000543992	5.15092e-05	1.009	1	1	2	731338586	731338586 [104-125]			PREDICTED: uncharacterized protein LOC104895554 isoform X2 [Beta vulgaris subsp. vulgaris]	731338586	1	2400.24	22
FALSE		High	Unambiguous	MSKEITALAPSSMK	[R].MSKEITALAPSSMK.[I]			4.92361e-07	5.15092e-05	1.934	3	4	26	731311848; 731343368; 731315233	731311848 [315-328]; 731343368 [315-328]; 731315233 [315-328]			PREDICTED: actin-7 [Beta vulgaris subsp. vulgaris] PREDICTED: actin-11 [Beta vulgaris subsp. vulgaris] PREDICTED: actin-1 [Beta vulgaris subsp. vulgaris]	731311848; 731348994; 731343368; 731315233	1	1493.77	14			10.5	0.5	0.9	209.9	223.1	156.7	162	236.4			791929	43583.5	153569	1.18335e+07	2.79202e+07	21512503	2.60248e+07	6.49904e+07			2.89802e+06	123836	251798		5.76924e+07
FALSE		High	Unambiguous	MSKEITALAPNSMK	[R].MSKEITALAPNSMK.[I]			4.85508e-05	5.15092e-05	1.328	1	1	2	731311844	731311844 [315-328]			PREDICTED: actin-7 [Beta vulgaris subsp. vulgaris]	731311844	1	1520.78	14						146.9				853.1						141576				4.00869e+06							690230
FALSE		High	Unambiguous	MSHVTTISR	[K].MSHVTTISR.[S]			0.000924142	5.15092e-05	0.939	1	1	2	731350484	731350484 [176-184]			PREDICTED: uncharacterized protein LOC104900727 [Beta vulgaris subsp. vulgaris]	731350484	0	1031.53	9	265.4	370.3	153.8	19.3		127.4	23.1	9.6	11.5	19.6	2.02855e+06	2328271	693228	112123		431225	173272	79029.4	110995	322713	4.37857e+06	6.10988e+06	2.53683e+06	318580			2.10236e+06
FALSE		High	Unambiguous	MSHISTGGGASLELLEGKPLPGVLALDDA	[K].MSHISTGGGASLELLEGKPLPGVLALDDA.[-]	1xOxidation [M1]	1xOxidation [M1]	5.55161e-09	5.15092e-05	2.526	1	1	4	731318922	731318922 [373-401]			PREDICTED: phosphoglycerate kinase 3, cytosolic [Beta vulgaris subsp. vulgaris]	731318922	0	2864.47	29	23.3	88.5	56.6	104.3	309.6	202.8	43.9	37.3	24.5	109.1	264507	826102	378569	899192	4.62357e+06	1.01853e+06	489380	455528	350308	2.67194e+06	570932	2.16787e+06	1.38535e+06	2.55492e+06	7.581e+06		4.96568e+06
FALSE		High	Unambiguous	MSHISTGGGASLELLEGKPLPGVLALDDA	[K].MSHISTGGGASLELLEGKPLPGVLALDDA.[-]			6.75238e-11	5.15092e-05	3.108	1	1	17	731318922	731318922 [373-401]			PREDICTED: phosphoglycerate kinase 3, cytosolic [Beta vulgaris subsp. vulgaris]	731318922	0	2848.48	29	146	135.5	58.8	169.2	164.7	146.9	53	14.3	47.9	63.7	2.96182e+07	2.26077e+07	7042365	26076892	44006119	13194803	1.0572e+07	3.12845e+06	1.22589e+07	2.79186e+07	6.39301e+07	5.93274e+07	2.57711e+07	7.40936e+07	7.21543e+07		6.4329e+07
FALSE		High	Unambiguous	MSKPWGGIGSWAAEAER	[-].MSKPWGGIGSWAAEAER.[E]	1xMet-loss+Acetyl [N-Term]	1xMet-loss+Acetyl [N-Term]	9.8911e-06	5.15092e-05	1.538	1	1	2	731342204	731342204 [1-17]	731342204 1xMet-loss+Acetyl [N-Term]	731342204 1xMet-loss+Acetyl [N-Term]	PREDICTED: eukaryotic translation initiation factor 4B1 [Beta vulgaris subsp. vulgaris]	731342204	0	1743.84	17		225.1	244.4	21.8	284.2	121.5	37.5	17	24.1	24.4		2447871	1.90591e+06	218577	4.94543e+06	710836	487496	242240	402033	696003		6.42374e+06	6.97456e+06	621055	8.10873e+06		3.46556e+06
FALSE		High	Unambiguous	MSHELVLLDYWASPYVAR	[-].MSHELVLLDYWASPYVAR.[V]	1xMet-loss+Acetyl [N-Term]	1xMet-loss+Acetyl [N-Term]	4.04092e-08	5.15092e-05	2.264	1	1	7	731378740	731378740 [1-18]	731378740 1xMet-loss+Acetyl [N-Term]	731378740 1xMet-loss+Acetyl [N-Term]	PREDICTED: probable glutathione S-transferase parC [Beta vulgaris subsp. vulgaris]	731378740	0	2061.04	18				9.3	10.7	338.3	170.2	107.2	105.1	259.2				108282	215206	2.29589e+06	2.56321e+06	1.77131e+06	2.03128e+06	8.57613e+06				307667	352861		1.11932e+07
FALSE		High	Unambiguous	MSLLALEKPQMLTEGDGGSYASWNTTVFPYLGTAK	[K].MSLLALEKPQMLTEGDGGSYASWNTTVFPYLGTAK.[V]	1xOxidation [M11]	1xOxidation [M11]	4.01278e-07	5.15092e-05	1.961	1	1	2	731334959	731334959 [4-38]			PREDICTED: uncharacterized protein LOC104894026 [Beta vulgaris subsp. vulgaris]	731334959	0	3792.85	35										1000										1.60125e+06
FALSE		High	Unambiguous	MSLIPSFFGSR	[-].MSLIPSFFGSR.[K]	1xMet-loss+Acetyl [N-Term]	1xMet-loss+Acetyl [N-Term]	0.000759045	5.15092e-05	0.965	1	1	3	731349021	731349021 [1-11]	731349021 1xMet-loss+Acetyl [N-Term]	731349021 1xMet-loss+Acetyl [N-Term]	PREDICTED: 17.4 kDa class I heat shock protein [Beta vulgaris subsp. vulgaris]	731349021	0	1152.6	11				149.4			149.4	312.4	172.3	216.4				259531			335756	769639	496869	1068111				737419
FALSE		High	Unambiguous	MSNLGGGAEAHAR	[-].MSNLGGGAEAHAR.[F]	1xMet-loss+Acetyl [N-Term]	1xMet-loss+Acetyl [N-Term]	5.08087e-05	5.15092e-05	1.322	1	1	1	731320346	731320346 [1-13]	731320346 1xMet-loss+Acetyl [N-Term]	731320346 1xMet-loss+Acetyl [N-Term]	PREDICTED: DExH-box ATP-dependent RNA helicase DExH12-like [Beta vulgaris subsp. vulgaris]	731320346	0	1181.57	13	58.5		491.9	98.8		85.7		66.3	131.4	67.4	173663		861162	222810		112643		212034	491934	431851	374848		3.15137e+06	633082			549173
FALSE		High	Unambiguous	MSMMEITNVSEYEKLAK	[-].MSMMEITNVSEYEKLAK.[E]	1xMet-loss+Acetyl [N-Term]	1xMet-loss+Acetyl [N-Term]	0.000122345	5.15092e-05	1.206	1	1	1	731373672	731373672 [1-17]	731373672 1xMet-loss+Acetyl [N-Term]	731373672 1xMet-loss+Acetyl [N-Term]	PREDICTED: peroxisomal (S)-2-hydroxy-acid oxidase GLO1 isoform X1 [Beta vulgaris subsp. vulgaris]	731373672	1	1914.92	17			43.1						548.1	408.8			29891.2						812426	1.03696e+06			109385
FALSE		High	Unambiguous	MSMMEITNVSEYEK	[-].MSMMEITNVSEYEK.[L]	1xMet-loss+Acetyl [N-Term]	1xMet-loss+Acetyl [N-Term]	0.00013916	5.15092e-05	1.189	1	1	4	731373672	731373672 [1-14]	731373672 1xMet-loss+Acetyl [N-Term]	731373672 1xMet-loss+Acetyl [N-Term]	PREDICTED: peroxisomal (S)-2-hydroxy-acid oxidase GLO1 isoform X1 [Beta vulgaris subsp. vulgaris]	731373672	0	1602.7	14	107.5		93.1	126.4			142.4	254.3	143.3	133.1	407982		208419	364535			531099	1.04022e+06	686172	1090796	880619		762696	1.03577e+06
FALSE		High	Unambiguous	MSMDSDTSSHAGDYKYFR	[-].MSMDSDTSSHAGDYKYFR.[Q]	1xMet-loss+Acetyl [N-Term]	1xMet-loss+Acetyl [N-Term]	2.62839e-05	5.15092e-05	1.409	1	1	1	731331434	731331434 [1-18]	731331434 1xMet-loss+Acetyl [N-Term]	731331434 1xMet-loss+Acetyl [N-Term]	PREDICTED: SNARE-interacting protein KEULE [Beta vulgaris subsp. vulgaris]	731331434	1	2008.83	18						109.4	178.6	329.4	113	269.6						115981	419994	849825	341222	1.3927e+06							565443
FALSE		High	Unambiguous	MSMDITSYLLAAQSPDAK	[-].MSMDITSYLLAAQSPDAK.[V]	1xMet-loss+Acetyl [N-Term]	1xMet-loss+Acetyl [N-Term]	3.86135e-08	5.15092e-05	2.27	1	1	8	731331702	731331702 [1-18]	731331702 1xMet-loss+Acetyl [N-Term]	731331702 1xMet-loss+Acetyl [N-Term]	PREDICTED: importin subunit beta-1 [Beta vulgaris subsp. vulgaris]	731331702	0	1852.9	18	53		91.9	81.6	142.7	85	160.2	199.7	59.4	126.7	442359		452065	517086	1.56697e+06	314029	1.31312e+06	1.7952e+06	624805	2.28087e+06	954821		1.6543e+06	1.46922e+06	2.56927e+06		1.531e+06
FALSE		High	Unambiguous	MSLWYEHLGMLDNAFLEPESLECVR	[R].MSLWYEHLGMLDNAFLEPESLECVR.[K]	1xCarbamidomethyl [C23]	1xCarbamidomethyl [C23]	4.91783e-09	5.15092e-05	2.542	1	1	6	731353298	731353298 [713-737]			PREDICTED: phospholipase D alpha 1 [Beta vulgaris subsp. vulgaris]	731353298	0	3039.4	25	238.4	120.7	108.3		40.8		274	142.1	75.7		3.85329e+06	1.60494e+06	1.03277e+06		868581		4.3521e+06	2.47594e+06	1.5443e+06		8.31723e+06	4.21169e+06	3.77934e+06		1.42416e+06
FALSE		High	Unambiguous	MSLVANEEFQHILR	[-].MSLVANEEFQHILR.[L]	1xMet-loss+Acetyl [N-Term]	1xMet-loss+Acetyl [N-Term]	4.39212e-08	5.15092e-05	2.253	2	2	112	731361198; 731374327	731361198 [1-14]; 731374327 [1-14]	731361198 1xMet-loss+Acetyl [N-Term]; 731374327 1xMet-loss+Acetyl [N-Term]	731361198 1xMet-loss+Acetyl [N-Term]; 731374327 1xMet-loss+Acetyl [N-Term]	PREDICTED: 40S ribosomal protein S18 [Beta vulgaris subsp. vulgaris] PREDICTED: 40S ribosomal protein S18 [Beta vulgaris subsp. vulgaris]	731361198; 731374327	0	1597.83	14	81.5	92.5	51.1	81.6	271.4	49.8	76.5	120.3	77	98.3	7.49222e+07	6.99094e+07	2.77057e+07	5.69215e+07	328313367	2.02538e+07	6.90492e+07	1.19098e+08	8.92021e+07	1.94924e+08	1.61718e+08	1.83457e+08	1.01387e+08	1.61734e+08	5.38317e+08		9.87441e+07
FALSE		High	Unambiguous	MSILNTAGSFK	[R].MSILNTAGSFK.[F]			4.04792e-05	5.15092e-05	1.352	1	1	1	731362980	731362980 [932-942]			PREDICTED: alpha-1,4 glucan phosphorylase L isozyme, chloroplastic/amyloplastic [Beta vulgaris subsp. vulgaris]	731362980	0	1168.6	11			65.5	265.9		56.7	35.1	60.5	96	420.4			64314.7	336390		41775.7	57427.1	108558	201763	1.51146e+06			235356	955802			203670
FALSE		High	Unambiguous	MSLSTASYLAR	[-].MSLSTASYLAR.[R]	1xMet-loss+Acetyl [N-Term]	1xMet-loss+Acetyl [N-Term]	0.000573602	5.15092e-05	1.002	1	1	9	731358449	731358449 [1-11]	731358449 1xMet-loss+Acetyl [N-Term]	731358449 1xMet-loss+Acetyl [N-Term]	PREDICTED: NADH dehydrogenase [ubiquinone] 1 beta subcomplex subunit 9 [Beta vulgaris subsp. vulgaris]	731358449	0	1110.58	11	35.2		138.1	164.3	14.8	41.1	90	243.9	102.3	170.3	2099649		4.86431e+06	7.45071e+06	1.16252e+06	1.08735e+06	5.28284e+06	1.56946e+07	7.70461e+06	2.19493e+07	4.53204e+06		1.78006e+07	2.11701e+07	1.90611e+06		5.30118e+06
FALSE		High	Unambiguous	MSLRVLNPNAEVLNKSEALR	[-].MSLRVLNPNAEVLNKSEALR.[M]	1xMet-loss+Acetyl [N-Term]	1xMet-loss+Acetyl [N-Term]	6.60451e-10	5.15092e-05	2.807	1	1	2	731348344	731348344 [1-20]	731348344 1xMet-loss+Acetyl [N-Term]	731348344 1xMet-loss+Acetyl [N-Term]	PREDICTED: T-complex protein 1 subunit zeta 1 [Beta vulgaris subsp. vulgaris]	731348344	2	2165.2	20						21.6	221.1	757.3								34204	778158	2922586									166756
FALSE		High	Unambiguous	GGLITNANSGSAAGVGMVAVAAAAAAAASAASAASGR	[R].GGLITNANSGSAAGVGMVAVAAAAAAAASAASAASGR.[V]	1xGG [S11]	1xGG [S11]	0.00339214	0.000100671	0.767	1	1	2	1108976791	1108976791 [425-461]			PREDICTED: uncharacterized protein LOC104902978 [Beta vulgaris subsp. vulgaris]	1108976791	0	3186.59	37
FALSE		High	Unambiguous	MSLMGLIVGDIPGVNRER	[R].MSLMGLIVGDIPGVNRER.[C]			3.42648e-05	5.15092e-05	1.374	1	1	3	731340376	731340376 [117-134]			PREDICTED: HD domain-containing protein 2 homolog [Beta vulgaris subsp. vulgaris]	731340376	1	1957.04	18			117.2	306.5			142.9	166.6	164.1	102.6			321254	1.08167e+06			652210	834353	961806	1.02913e+06			1.17561e+06	3.07341e+06
FALSE		High	Unambiguous	MSLIVLDELVQSLISK	[-].MSLIVLDELVQSLISK.[K]	1xMet-loss+Acetyl [N-Term]	1xMet-loss+Acetyl [N-Term]	1.12376e-07	5.15092e-05	2.129	1	3	3	1108792910	1108792910 [1-16]	1108792910 1xMet-loss+Acetyl [N-Term]	1108792910 1xMet-loss+Acetyl [N-Term]	PREDICTED: uncharacterized protein LOC104906676 isoform X1 [Beta vulgaris subsp. vulgaris]	1108792910; 731364055; 1108792917	0	1698.99	16	224.1	309.7	78.8			83.2	33.2	17.8	239.6	13.5	1.46189e+06	1.66211e+06	303401			240329	212765	125150	1.97156e+06	190777	3.15545e+06	4.36173e+06	1.11028e+06				1.17168e+06
FALSE		High	Unambiguous	MSILSTAGSGK	[K].MSILSTAGSGK.[F]			0.0011863	5.15092e-05	0.906	1	1	1	731348714	731348714 [810-820]			PREDICTED: alpha-glucan phosphorylase, H isozyme [Beta vulgaris subsp. vulgaris]	731348714	0	1051.55	11	47.6	150.3	80	118.9	6.1	19	116.3	206.6	173.8	81.3	425648	1.10473e+06	421893	807175	71971.8	75309.7	1.02135e+06	1.99008e+06	1.95938e+06	1.5681e+06	918751	2.89906e+06	1.54389e+06	2.29347e+06	118008		367160
FALSE		High	Unambiguous	MSLIRQEDSIIFSLLER	[R].MSLIRQEDSIIFSLLER.[S]			6.28148e-05	5.15092e-05	1.294	1	1	2	731319355	731319355 [81-97]			PREDICTED: chorismate mutase 3, chloroplastic [Beta vulgaris subsp. vulgaris]	731319355	1	2050.1	17				107.1			336.3	375.6	181					104539			424464	519914	293317					297032
FALSE		High	Unambiguous	MSLIPTNWFNNR	[-].MSLIPTNWFNNR.[R]	1xMet-loss+Acetyl [N-Term]	1xMet-loss+Acetyl [N-Term]	2.60855e-05	5.15092e-05	1.41	1	1	5	731315517	731315517 [1-12]	731315517 1xMet-loss+Acetyl [N-Term]	731315517 1xMet-loss+Acetyl [N-Term]	PREDICTED: 18.3 kDa class I heat shock protein [Beta vulgaris subsp. vulgaris]	731315517	0	1403.71	12	6.5		179.7	92.4		124.4	135.4	123.6	173.9	164	76495.5		1.2473e+06	826317		648211	1.56567e+06	1.56783e+06	2.58157e+06	4.16669e+06	165114		4.56441e+06	2.34786e+06			3.16024e+06
FALSE		High	Unambiguous	MSLSAISEELGEIDGQISDIFR	[-].MSLSAISEELGEIDGQISDIFR.[A]	1xMet-loss+Acetyl [N-Term]	1xMet-loss+Acetyl [N-Term]	1.01954e-05	5.15092e-05	1.534	1	1	2	731367158	731367158 [1-22]	731367158 1xMet-loss+Acetyl [N-Term]	731367158 1xMet-loss+Acetyl [N-Term]	PREDICTED: novel plant SNARE 11 [Beta vulgaris subsp. vulgaris]	731367158	0	2321.15	22					490.4			509.6							1.09781e+06			934099							1.80002e+06
FALSE		High	Unambiguous	AAVGVGPLAWSDTVAAYAQQYANQR	[R].AAVGVGPLAWSDTVAAYAQQYANQR.[A]	1xGG [S/T]	1xGG [S11; T13]	0.00227321	0.000100671	0.82	1	1	2	731359890	731359890 [43-67]			PREDICTED: pathogenesis-related protein 1A [Beta vulgaris subsp. vulgaris]	731359890	0	2721.34	25
FALSE		High	Unambiguous	MSGTQEEDKKPGDQSAHINLK	[-].MSGTQEEDKKPGDQSAHINLK.[V]	1xMet-loss+Acetyl [N-Term]	1xMet-loss+Acetyl [N-Term]	2.40976e-11	5.15092e-05	3.244	1	1	27	731329735	731329735 [1-21]	731329735 1xMet-loss+Acetyl [N-Term]	731329735 1xMet-loss+Acetyl [N-Term]	PREDICTED: small ubiquitin-related modifier 1 [Beta vulgaris subsp. vulgaris]	731329735	1	2224.08	21	0.4	16.7	19.8	62.7	45.5	387.7	111.8	99.1	131.9	124.3	93629.2	2.94447e+06	2.49263e+06	1.01863e+07	12813903	3.6718e+07	2.35044e+07	2.28334e+07	3.55943e+07	5.73826e+07	202096	7.72693e+06	9.12165e+06	2.89428e+07	2.10102e+07		1.79012e+08
FALSE		High	Unambiguous	MSGSDPNSAIYVTDSAK	[K].MSGSDPNSAIYVTDSAK.[D]			1.92548e-06	5.15092e-05	1.754	1	1	3	731326783	731326783 [282-298]			PREDICTED: tryptophan--tRNA ligase, cytoplasmic [Beta vulgaris subsp. vulgaris]	731326783	0	1742.79	17	69.5				25.2	61.4	190.6	154.5	252.4	246.4	104699				50047.5	40981	282214	251010	479795	801393	225990				82060.1		199796
FALSE		High	Unambiguous	MSELGFNPPKLPVKA	[K].MSELGFNPPKLPVKA.[-]			2.06254e-05	5.15092e-05	1.441	1	1	7	731337647	731337647 [239-253]			PREDICTED: L-ascorbate peroxidase 3, peroxisomal [Beta vulgaris subsp. vulgaris]	731337647	2	1627.89	15	39.4	254.7	122.8	67.4	62.4	36.6	60.1	110.2	106.3	140.1	2.28647e+06	1.21722e+07	4.20885e+06	2.97318e+06	4.77443e+06	940468	3.43285e+06	6.90234e+06	7.78738e+06	1.75637e+07	4.9353e+06	3.19424e+07	1.5402e+07	8.44785e+06	7.82836e+06		4.58509e+06
FALSE		High	Unambiguous	MSEAERVGYELLK	[R].MSEAERVGYELLK.[S]			0.00115094	5.15092e-05	0.91	1	1	2	731348652	731348652 [169-181]			PREDICTED: eukaryotic translation initiation factor 3 subunit F [Beta vulgaris subsp. vulgaris]	731348652	1	1524.77	13			56.3	78.9	27.4	251.6	118.6	169	44.1	254.1			364035	657584	395236	1221765	1.27784e+06	1.9981e+06	610668	6.01646e+06			1.33216e+06	1.86843e+06	648046		5.95651e+06
FALSE		High	Unambiguous	MSDTTADESPSAGAISDAGETQQPAPAENLSEKMEK	[-].MSDTTADESPSAGAISDAGETQQPAPAENLSEKMEK.[M]	1xMet-loss+Acetyl [N-Term]	1xMet-loss+Acetyl [N-Term]	4.96669e-05	5.15092e-05	1.325	1	1	4	731314788	731314788 [1-36]	731314788 1xMet-loss+Acetyl [N-Term]	731314788 1xMet-loss+Acetyl [N-Term]	PREDICTED: MFP1 attachment factor 1 [Beta vulgaris subsp. vulgaris]	731314788	1	3604.61	36					7.3	27.6	198.3	395.5	100.4	270.9					128258	163620	2.60519e+06	5.69983e+06	1.69304e+06	7819085					210297		797699
FALSE		High	Unambiguous	MSDSQETDKNIEIWKIK	[-].MSDSQETDKNIEIWKIK.[K]	1xMet-loss+Acetyl [N-Term]	1xMet-loss+Acetyl [N-Term]	1.25096e-05	5.15092e-05	1.507	1	1	1	731335227	731335227 [1-17]	731335227 1xMet-loss+Acetyl [N-Term]	731335227 1xMet-loss+Acetyl [N-Term]	PREDICTED: eukaryotic peptide chain release factor subunit 1-3 [Beta vulgaris subsp. vulgaris]	731335227	2	1976	17	22.7	12.9	288.6				226.7	449.1			104831	49150.4	786726				1.02957e+06	2.2372e+06			226275	128981	2.87898e+06
FALSE		High	Unambiguous	MSDSQETDKNIEIWK	[-].MSDSQETDKNIEIWK.[I]	1xMet-loss+Acetyl [N-Term]	1xMet-loss+Acetyl [N-Term]	0.00105901	5.15092e-05	0.921	1	1	2	731335227	731335227 [1-15]	731335227 1xMet-loss+Acetyl [N-Term]	731335227 1xMet-loss+Acetyl [N-Term]	PREDICTED: eukaryotic peptide chain release factor subunit 1-3 [Beta vulgaris subsp. vulgaris]	731335227	1	1734.82	15			45.8	355.6		53.6	103.2	167.7	97.3	176.8			811410	8.12139e+06		713791	3050186	5.43317e+06	3.69049e+06	11471850			2.96931e+06	2.30757e+07			3.47996e+06
FALSE		High	Unambiguous	MSDPQLIKDIKR	[R].MSDPQLIKDIKR.[A]			3.12694e-06	5.15092e-05	1.69	1	1	11	731348555	731348555 [80-91]			PREDICTED: probable pyridoxal 5'-phosphate synthase subunit PDX1 [Beta vulgaris subsp. vulgaris]	731348555	2	1443.8	12			12.2	36.8	0.2	82.2	243.2	314.4	224.3	86.8			278648	1.08192e+06	8033.04	1.40956e+06	9.25746e+06	1.31231e+07	1.0957e+07	7.25501e+06			1.0197e+06	3.07411e+06	13171.3		6.87205e+06
FALSE		High	Unambiguous	MSDNLMDKVTSLGERLR	[-].MSDNLMDKVTSLGERLR.[I]	1xMet-loss+Acetyl [N-Term]	1xMet-loss+Acetyl [N-Term]	2.10751e-07	5.15092e-05	2.046	1	1	4	731320998	731320998 [1-17]	731320998 1xMet-loss+Acetyl [N-Term]	731320998 1xMet-loss+Acetyl [N-Term]	PREDICTED: TOM1-like protein 2 [Beta vulgaris subsp. vulgaris]	731320998	2	1875.96	17			3.6	123.1		52.7	384.6	316	26.3	93.7			44108.2	1.9248e+06		480280	7.77703e+06	7.00709e+06	681349	4.16269e+06			161411	5.46902e+06			2.34152e+06
FALSE		High	Unambiguous	MSELLSEDGGDFITSYDEVYESFDK	[K].MSELLSEDGGDFITSYDEVYESFDK.[M]			3.39472e-08	5.15092e-05	2.287	1	1	36	731354626	731354626 [20-44]			PREDICTED: eukaryotic initiation factor 4A-9 [Beta vulgaris subsp. vulgaris]	731354626	0	2876.23	25	153.9	91.3	194.5	116.1	176	146.3	13.7	30.9	37.1	40.3	1.94176e+07	9.47957e+06	1.44733e+07	1.11259e+07	2.92292e+07	8.17085e+06	1.69696e+06	4.20758e+06	5.91001e+06	1.09631e+07	4.19123e+07	2.48764e+07	5.29643e+07	3.16125e+07	4.79255e+07		3.98356e+07
FALSE		High	Unambiguous	MSDNLMDKVTSLGER	[-].MSDNLMDKVTSLGER.[L]	1xMet-loss+Acetyl [N-Term]	1xMet-loss+Acetyl [N-Term]	7.63602e-08	5.15092e-05	2.18	1	1	11	731320998	731320998 [1-15]	731320998 1xMet-loss+Acetyl [N-Term]	731320998 1xMet-loss+Acetyl [N-Term]	PREDICTED: TOM1-like protein 2 [Beta vulgaris subsp. vulgaris]	731320998	1	1606.77	15	6.6		5	82.9	52.6	50	139.7	238	122.7	302.3	306303		137089	2.90589e+06	3195442	1.02126e+06	6.33287e+06	1.18275e+07	7.13533e+06	3.00938e+07	661147		501671	8.25665e+06	5.23938e+06		4.97898e+06
FALSE		High	Unambiguous	MSDIDVQIPAAYDPFADANAENSGAGSKDYVHIR	[-].MSDIDVQIPAAYDPFADANAENSGAGSKDYVHIR.[V]	1xMet-loss+Acetyl [N-Term]	1xMet-loss+Acetyl [N-Term]	2.15595e-07	5.15092e-05	2.043	1	1	3	731364906	731364906 [1-34]	731364906 1xMet-loss+Acetyl [N-Term]	731364906 1xMet-loss+Acetyl [N-Term]	PREDICTED: protein translation factor SUI1 homolog [Beta vulgaris subsp. vulgaris]	731364906	1	3548.66	34							270.4	514.9	214.8								2168030	4528099	2.21064e+06
FALSE		High	Unambiguous	MSDLDVPLRPK	[-].MSDLDVPLRPK.[R]	1xMet-loss [N-Term]	1xMet-loss [N-Term]	0.00209187	5.15092e-05	0.831	1	1	4	731354706	731354706 [1-11]	731354706 1xMet-loss [N-Term]	731354706 1xMet-loss [N-Term]	PREDICTED: delta(24)-sterol reductase [Beta vulgaris subsp. vulgaris]	731354706	0	1139.64	11	206.7	238.5	15.4	76.1		56.8	106.5	125.6	103.3	71.1	1.06792e+06	1.01344e+06	46819.1	298792		130002	540754	699182	672785	793435	2.30508e+06	2.65948e+06	171332	848974			633803
FALSE		High	Unambiguous	MSDGEEHHRGLFHR	[-].MSDGEEHHRGLFHR.[H]	1xMet-loss+Acetyl [N-Term]	1xMet-loss+Acetyl [N-Term]	9.10492e-05	5.15092e-05	1.245	2	2	3	731312247; 731312245	731312247 [1-14]; 731312245 [1-14]	731312247 1xMet-loss+Acetyl [N-Term]; 731312245 1xMet-loss+Acetyl [N-Term]	731312247 1xMet-loss+Acetyl [N-Term]; 731312245 1xMet-loss+Acetyl [N-Term]	PREDICTED: abscisic stress-ripening protein 1 [Beta vulgaris subsp. vulgaris] PREDICTED: abscisic stress-ripening protein 1 [Beta vulgaris subsp. vulgaris]	731312247; 731312245	1	1618.75	14			240.2	211.5		143.5	40.6	335.8	14.1	14.3			2.00789e+06	2.27638e+06		900426	566033	5.12779e+06	252040	437875			7.34776e+06	6.468e+06			4.38987e+06
FALSE		High	Unambiguous	MSDFLGYALK	[K].MSDFLGYALK.[S]			0.000186989	5.15092e-05	1.15	1	1	2	731327848	731327848 [271-280]			PREDICTED: probable linoleate 9S-lipoxygenase 5 [Beta vulgaris subsp. vulgaris]	731327848	0	1144.57	10		3.9		240.2	9.2	105.6			14.2	626.9		19995.4		1.14273e+06	76150.8	292816			112505	8474900		52472.3		3.24689e+06	124860		1.42757e+06
FALSE		High	Unambiguous	MSDEPFLTR	[-].MSDEPFLTR.[W]	1xMet-loss+Acetyl [N-Term]	1xMet-loss+Acetyl [N-Term]	0.00141178	5.15092e-05	0.883	1	1	2	731373696	731373696 [1-9]	731373696 1xMet-loss+Acetyl [N-Term]	731373696 1xMet-loss+Acetyl [N-Term]	PREDICTED: katanin p60 ATPase-containing subunit A-like 2 [Beta vulgaris subsp. vulgaris]	731373696	0	1006.48	9	90.2	108			85.4	42.9	260.7	287.3	125.4		166528	163999			207568	35086	472879	571466	291953		359446	430368			340338		171056
FALSE		High	Unambiguous	MSDELVLLEYWASPFVAR	[-].MSDELVLLEYWASPFVAR.[V]	1xMet-loss+Acetyl [N-Term]	1xMet-loss+Acetyl [N-Term]	6.66256e-08	5.15092e-05	2.198	1	1	2	731365986	731365986 [1-18]	731365986 1xMet-loss+Acetyl [N-Term]	731365986 1xMet-loss+Acetyl [N-Term]	PREDICTED: probable glutathione S-transferase [Beta vulgaris subsp. vulgaris]	731365986	0	2037.03	18						578.3				421.7						308678				1.09733e+06							1.50491e+06
FALSE		High	Unambiguous	MSDEEHQFESKADSGASKTFPQQAGTIR	[-].MSDEEHQFESKADSGASKTFPQQAGTIR.[K]	1xPhospho [D/K/S/T]; 1xMet-loss+Acetyl [N-Term]	1xPhospho [S2; D3; S17; K18; T19]; 1xMet-loss+Acetyl [N-Term]	1.55834e-05	5.15092e-05	1.478	1	1	8	731343825	731343825 [1-28]	731343825 1xPhospho [S2; D3]; 1xMet-loss+Acetyl [N-Term]	731343825 1xPhospho [S/D]; 1xMet-loss+Acetyl [N-Term]	PREDICTED: eukaryotic translation initiation factor 5A [Beta vulgaris subsp. vulgaris]	731343825	2	3073.35	28						33.7	167	521	85.8	192.5						193051	2.126e+06	7.27574e+06	1.40216e+06	5384045							941189
FALSE		High	Unambiguous	MSDLIYRPEEEVLAELEEFKSHVVTCASK	[R].MSDLIYRPEEEVLAELEEFKSHVVTCASK.[S]	1xCarbamidomethyl [C26]	1xCarbamidomethyl [C26]	6.61616e-07	5.15092e-05	1.895	1	1	2	731375151	731375151 [481-509]			PREDICTED: WD-40 repeat-containing protein MSI4 [Beta vulgaris subsp. vulgaris]	731375151	1	3409.67	29	179	442.1	109.8	201.1		21.4	27.6	9.3	9.7		986917	2.00549e+06	357220	842380		52226	149674	55528.9	67458.1		2.13024e+06	5.26284e+06	1.30722e+06	2.3935e+06			254619
FALSE		High	Unambiguous	MSELLSEDGGDFITSYDEVYESFDKMGLLENLLR	[K].MSELLSEDGGDFITSYDEVYESFDKMGLLENLLR.[G]			5.64629e-06	5.15092e-05	1.612	1	1	7	731354626	731354626 [20-53]			PREDICTED: eukaryotic initiation factor 4A-9 [Beta vulgaris subsp. vulgaris]	731354626	1	3915.82	34							307.1	255.1	294.2	143.5							3.70338e+06	3374138	4.5535e+06	3.80074e+06
FALSE		High	Unambiguous	MSELLSEEGSDFFTSYDEVYESFDK	[K].MSELLSEEGSDFFTSYDEVYESFDK.[M]			2.85185e-08	5.15092e-05	2.31	1	1	21	731317796	731317796 [20-44]			PREDICTED: eukaryotic initiation factor 4A-9 [Beta vulgaris subsp. vulgaris]	731317796	0	2954.24	25	124.5	105.5	72	177.7	147.4	162.8	46	17.8	68.8	77.5	1.33856e+07	9333157	4.56494e+06	1.45154e+07	2.08599e+07	7.75137e+06	4.863e+06	2.06057e+06	9.32989e+06	1.79748e+07	2.88924e+07	2.44922e+07	1.67051e+07	4.12434e+07	3.42027e+07		3.77905e+07
FALSE		High	Unambiguous	MSELLSEEGSDFFTSYDEVYESFDK	[K].MSELLSEEGSDFFTSYDEVYESFDK.[M]	1xOxidation [M1]	1xOxidation [M1]	0.000552292	5.15092e-05	1.007	1	1	2	731317796	731317796 [20-44]			PREDICTED: eukaryotic initiation factor 4A-9 [Beta vulgaris subsp. vulgaris]	731317796	0	2970.24	25					938.1					61.9					2342051					253309					3.84013e+06
FALSE		High	Unambiguous	MSGKGEGPAIGIDLGTTYSCVGVWQHDRVEIIANDQGNR	[-].MSGKGEGPAIGIDLGTTYSCVGVWQHDRVEIIANDQGNR.[T]	1xCarbamidomethyl [C20]; 1xMet-loss+Acetyl [N-Term]	1xCarbamidomethyl [C20]; 1xMet-loss+Acetyl [N-Term]	3.98928e-17	5.15092e-05	5.001	1	1	4	731349044	731349044 [1-39]	731349044 1xMet-loss+Acetyl [N-Term]	731349044 1xMet-loss+Acetyl [N-Term]	PREDICTED: heat shock cognate 70 kDa protein 2 [Beta vulgaris subsp. vulgaris]	731349044	2	4111.99	39	388.7				317.1	192.1		16.6		85.5	6.72273e+06				7220611	1.47081e+06		309418		3.19358e+06	1.45108e+07				1.18392e+07		7.17069e+06
FALSE		High	Unambiguous	MSGKGEGPAIGIDLGTTYSCVGVWQHDR	[-].MSGKGEGPAIGIDLGTTYSCVGVWQHDR.[V]	1xCarbamidomethyl [C20]; 1xMet-loss+Acetyl [N-Term]	1xCarbamidomethyl [C20]; 1xMet-loss+Acetyl [N-Term]	4.51133e-14	5.15092e-05	4.073	1	1	2	731349044	731349044 [1-28]	731349044 1xMet-loss+Acetyl [N-Term]	731349044 1xMet-loss+Acetyl [N-Term]	PREDICTED: heat shock cognate 70 kDa protein 2 [Beta vulgaris subsp. vulgaris]	731349044	1	2902.38	28	383.3	343.7				52.6	16.6		175.7	28	2.65503e+06	1.9581e+06				161438	113204		1.5344e+06	418757	5.73082e+06	5.13847e+06					787061
FALSE		High	Unambiguous	MSGEEVAVAAPVPETPAPLGETMDLMTALQLVLKK	[-].MSGEEVAVAAPVPETPAPLGETMDLMTALQLVLKK.[S]	1xOxidation [M23]; 1xMet-loss+Acetyl [N-Term]	1xOxidation [M23]; 1xMet-loss+Acetyl [N-Term]	8.25098e-05	5.15092e-05	1.258	1	1	1	731360035	731360035 [1-35]	731360035 1xMet-loss+Acetyl [N-Term]	731360035 1xMet-loss+Acetyl [N-Term]	PREDICTED: 40S ribosomal protein S12 [Beta vulgaris subsp. vulgaris]	731360035	1	3563.86	35				70.1		431.6	388.8	65.8		43.6				226294		811800	1.62317e+06	301243		400086				642981			3.95779e+06
FALSE		High	Unambiguous	MSGEEVAVAAPVPETPAPLGETMDLMTALQLVLKK	[-].MSGEEVAVAAPVPETPAPLGETMDLMTALQLVLKK.[S]	1xMet-loss+Acetyl [N-Term]	1xMet-loss+Acetyl [N-Term]	3.04592e-12	5.15092e-05	3.517	1	1	31	731360035	731360035 [1-35]	731360035 1xMet-loss+Acetyl [N-Term]	731360035 1xMet-loss+Acetyl [N-Term]	PREDICTED: 40S ribosomal protein S12 [Beta vulgaris subsp. vulgaris]	731360035	1	3547.86	35	27	88.9	56.2	60.8	213.9	93	142.3	141	122.8	54.1	7.25186e+06	1.96417e+07	8.89725e+06	1.23997e+07	7.56217e+07	1.10584e+07	3.75587e+07	4.07993e+07	4.16025e+07	3.1352e+07	1.5653e+07	5.15439e+07	3.25589e+07	3.5232e+07	1.23992e+08		5.39136e+07
FALSE		High	Unambiguous	MSGEEVAVAAPVPETPAPLGETMDLMTALQLVLK	[-].MSGEEVAVAAPVPETPAPLGETMDLMTALQLVLK.[K]	1xMet-loss+Acetyl [N-Term]	1xMet-loss+Acetyl [N-Term]	1.8778e-10	5.15092e-05	2.973	1	1	16	731360035	731360035 [1-34]	731360035 1xMet-loss+Acetyl [N-Term]	731360035 1xMet-loss+Acetyl [N-Term]	PREDICTED: 40S ribosomal protein S12 [Beta vulgaris subsp. vulgaris]	731360035	0	3419.77	34	18	130.2	239.6	45.3	110.8	42	84.6	109	163.3	57.3	1.18479e+06	7.05454e+06	9.30991e+06	2.26942e+06	9613894	1.22622e+06	5.47662e+06	7.73872e+06	1.35673e+07	8.14324e+06	2.55735e+06	1.85126e+07	3.4069e+07	6.44822e+06	1.57633e+07		5.97824e+06
FALSE		High	Unambiguous	MSGEEEENAAELKLGEDFVKAK	[-].MSGEEEENAAELKLGEDFVKAK.[C]	1xMet-loss+Acetyl [N-Term]	1xMet-loss+Acetyl [N-Term]	1.93671e-09	5.15092e-05	2.665	1	1	2	731347082	731347082 [1-22]	731347082 1xMet-loss+Acetyl [N-Term]	731347082 1xMet-loss+Acetyl [N-Term]	PREDICTED: DNA-directed RNA polymerase II subunit 4 [Beta vulgaris subsp. vulgaris]	731347082	2	2335.13	22	61.8			22.7		279.5	48.8	259	28.5	299.7	301670			84183.2		604174	234007	1.36289e+06	175215	3.1584e+06	651148			239194			2.94555e+06
FALSE		High	Unambiguous	MSGEEEENAAELKLGEDFVK	[-].MSGEEEENAAELKLGEDFVK.[A]	1xMet-loss+Acetyl [N-Term]	1xMet-loss+Acetyl [N-Term]	1.55561e-08	5.15092e-05	2.39	1	1	3	731347082	731347082 [1-20]	731347082 1xMet-loss+Acetyl [N-Term]	731347082 1xMet-loss+Acetyl [N-Term]	PREDICTED: DNA-directed RNA polymerase II subunit 4 [Beta vulgaris subsp. vulgaris]	731347082	1	2136	20						32.4	147.8	347.5	151.2	321.1						41913.6	423841	1.09284e+06	556417	2.02243e+06							204343
FALSE		High	Unambiguous	MSGAFPSFSK	[R].MSGAFPSFSK.[D]			7.14486e-05	5.15092e-05	1.277	2	2	2	731329891; 731329889	731329891 [385-394]; 731329889 [386-395]			PREDICTED: uncharacterized protein LOC104891780 [Beta vulgaris subsp. vulgaris] PREDICTED: uncharacterized protein LOC104891779 [Beta vulgaris subsp. vulgaris]	731329891; 731329889	0	1058.5	10	960.5					39.5					1.4383e+06					26169.4					3.10453e+06						127584
FALSE		High	Unambiguous	MSFSGTSAGSGGNAAR	[-].MSFSGTSAGSGGNAAR.[K]	1xMet-loss+Acetyl [N-Term]	1xMet-loss+Acetyl [N-Term]	1.77048e-07	5.15092e-05	2.069	1	1	5	731353447	731353447 [1-16]	731353447 1xMet-loss+Acetyl [N-Term]	731353447 1xMet-loss+Acetyl [N-Term]	PREDICTED: acyl-protein thioesterase 2 isoform X4 [Beta vulgaris subsp. vulgaris]	731353447	0	1368.61	16	64.7	3.4	131.9	75.8	68.4	44.1	102.6	195.9	125.2	187.9	485411	20696.7	583394	431573	675101	146522	755728	1.58318e+06	1184321	3.04054e+06	1.04775e+06	54312.5	2.1349e+06	1.22625e+06	1.10692e+06		714344
FALSE		High	Unambiguous	MSFLVGYGDKYPQFVHHR	[K].MSFLVGYGDKYPQFVHHR.[G]			5.35758e-05	5.15092e-05	1.315	1	1	1	731375859	731375859 [425-442]			PREDICTED: endoglucanase 2 [Beta vulgaris subsp. vulgaris]	731375859	1	2181.07	18							18.6	616.9	364.4								13134.9	477188	329869
FALSE		High	Unambiguous	MSFEDNDLTGDISGLGPFELEALQDWEYKFMSK	[K].MSFEDNDLTGDISGLGPFELEALQDWEYKFMSK.[Y]			1.55653e-07	5.15092e-05	2.086	1	1	5	731363620	731363620 [127-159]			PREDICTED: membrane steroid-binding protein 2 [Beta vulgaris subsp. vulgaris]	731363620	1	3812.73	33							168.9	415.8	415.3								1.14057e+06	3.08022e+06	3.60066e+06
FALSE		High	Unambiguous	MSFEDNDLTGDISGLGPFELEALQDWEYK	[K].MSFEDNDLTGDISGLGPFELEALQDWEYK.[F]			3.95243e-07	5.15092e-05	1.963	1	1	10	731363620	731363620 [127-155]			PREDICTED: membrane steroid-binding protein 2 [Beta vulgaris subsp. vulgaris]	731363620	0	3319.5	29	131.5	87.2	101.2	127.4	285.5	111.6	32.4	43.7	40.8	38.7	4.10958e+06	2.24206e+06	1.86614e+06	3023734	11743369	1.54363e+06	993646	1.47113e+06	1.6075e+06	2.6126e+06	8.87042e+06	5.88365e+06	6.82901e+06	8.59149e+06	1.92549e+07		7.5257e+06
FALSE		High	Unambiguous	MSFDPVSSNTHHNLDEQIGQLMQCKPLSEQEVR	[-].MSFDPVSSNTHHNLDEQIGQLMQCKPLSEQEVR.[M]	1xCarbamidomethyl [C24]; 1xOxidation [M22]; 1xMet-loss+Acetyl [N-Term]	1xCarbamidomethyl [C24]; 1xOxidation [M22]; 1xMet-loss+Acetyl [N-Term]	0.0015934	5.15092e-05	0.867	1	1	1	731325420	731325420 [1-33]	731325420 1xMet-loss+Acetyl [N-Term]	731325420 1xMet-loss+Acetyl [N-Term]	PREDICTED: serine/threonine-protein phosphatase PP2A catalytic subunit [Beta vulgaris subsp. vulgaris]	731325420	0	3781.75	33						797.9				202.1						376156				464501							1.83389e+06
FALSE		High	Unambiguous	MSFDPVSSNTHHNLDEQIGQLMQCKPLSEQEVR	[-].MSFDPVSSNTHHNLDEQIGQLMQCKPLSEQEVR.[M]	1xCarbamidomethyl [C24]; 1xMet-loss+Acetyl [N-Term]	1xCarbamidomethyl [C24]; 1xMet-loss+Acetyl [N-Term]	8.50039e-06	5.15092e-05	1.558	1	1	3	731325420	731325420 [1-33]	731325420 1xMet-loss+Acetyl [N-Term]	731325420 1xMet-loss+Acetyl [N-Term]	PREDICTED: serine/threonine-protein phosphatase PP2A catalytic subunit [Beta vulgaris subsp. vulgaris]	731325420	0	3765.76	33			117.6				247.7	349	79.2	206.4			1.28274e+06				4502956	6957631	1.84771e+06	8241954			4.6941e+06
FALSE		High	Unambiguous	MSEVDEESKQVSYR	[K].MSEVDEESKQVSYR.[V]			1.75609e-08	5.15092e-05	2.374	1	1	4	731341153	731341153 [150-163]			PREDICTED: stromal 70 kDa heat shock-related protein, chloroplastic [Beta vulgaris subsp. vulgaris]	731341153	1	1686.76	14	6.3		45.1	57.4		325.1	172.4	120.9	129.3	143.5	157773		661797	1.08501e+06		3.58187e+06	4.21621e+06	3.24228e+06	4.05948e+06	7.70958e+06	340550		2.42181e+06	3.08289e+06			1.74628e+07
FALSE		High	Unambiguous	MSEVAQNQMAAGLSPEFPTAFTHGGQFIQYNIFGNLFEVTSK	[-].MSEVAQNQMAAGLSPEFPTAFTHGGQFIQYNIFGNLFEVTSK.[Y]	1xMet-loss+Acetyl [N-Term]	1xMet-loss+Acetyl [N-Term]	0.000148978	5.15092e-05	1.18	1	1	1	731355962	731355962 [1-42]	731355962 1xMet-loss+Acetyl [N-Term]	731355962 1xMet-loss+Acetyl [N-Term]	PREDICTED: mitogen-activated protein kinase 3 [Beta vulgaris subsp. vulgaris]	731355962	0	4518.17	42
FALSE		High	Unambiguous	MSELLSEEGSDFFTSYDEVYESFDKMGLLENLLR	[K].MSELLSEEGSDFFTSYDEVYESFDKMGLLENLLR.[G]			2.45375e-06	5.15092e-05	1.722	1	1	5	731317796	731317796 [20-53]			PREDICTED: eukaryotic initiation factor 4A-9 [Beta vulgaris subsp. vulgaris]	731317796	1	3993.83	34							502.2	126.5	307.8	63.5							4.20823e+06	1.16206e+06	3.31016e+06	1.16919e+06
FALSE		High	Unambiguous	MSNLIEKGTK	[-].MSNLIEKGTK.[I]	1xMet-loss+Acetyl [N-Term]	1xMet-loss+Acetyl [N-Term]	0.000350624	5.15092e-05	1.067	1	1	3	731368340	731368340 [1-10]	731368340 1xMet-loss+Acetyl [N-Term]	731368340 1xMet-loss+Acetyl [N-Term]	PREDICTED: acylpyruvase FAHD1, mitochondrial [Beta vulgaris subsp. vulgaris]	731368340	1	1031.57	10					1.4	61.7	179.4	391.7	173.1	192.6					26863.2	397851	2.56685e+06	6.14551e+06	3.17819e+06	6.05122e+06					44046		1.93966e+06
FALSE		High	Unambiguous	MSDEEHQFESKADSGASKTFPQQAGTIR	[-].MSDEEHQFESKADSGASKTFPQQAGTIR.[K]	1xMet-loss+Acetyl [N-Term]	1xMet-loss+Acetyl [N-Term]	1.69081e-08	5.15092e-05	2.379	1	1	5	731343825	731343825 [1-28]	731343825 1xMet-loss+Acetyl [N-Term]	731343825 1xMet-loss+Acetyl [N-Term]	PREDICTED: eukaryotic translation initiation factor 5A [Beta vulgaris subsp. vulgaris]	731343825	2	2993.39	28	11.2	3.1			3	48.1	225.8	468.2	82.4	158.3	260331	58902.2			91126.3	496672	5.17107e+06	1.1759e+07	2.4224e+06	7.96093e+06	561919	154572			149415		2.42144e+06
FALSE		High	Unambiguous	MSNLIEKGTKIIGVGR	[-].MSNLIEKGTKIIGVGR.[N]	1xMet-loss+Acetyl [N-Term]	1xMet-loss+Acetyl [N-Term]	9.03153e-06	5.15092e-05	1.55	1	1	1	731368340	731368340 [1-16]	731368340 1xMet-loss+Acetyl [N-Term]	731368340 1xMet-loss+Acetyl [N-Term]	PREDICTED: acylpyruvase FAHD1, mitochondrial [Beta vulgaris subsp. vulgaris]	731368340	2	1626.95	16						142.1		186.5	114.3	557.1						56102.3		179240	128501	1.07231e+06							273517
FALSE		High	Unambiguous	MSNPRVFFDMEVGNQPAGR	[-].MSNPRVFFDMEVGNQPAGR.[I]	1xOxidation [M10]; 1xMet-loss+Acetyl [N-Term]	1xOxidation [M10]; 1xMet-loss+Acetyl [N-Term]	0.000492994	5.15092e-05	1.022	1	1	1	731357859	731357859 [1-19]	731357859 1xMet-loss+Acetyl [N-Term]	731357859 1xMet-loss+Acetyl [N-Term]	PREDICTED: peptidyl-prolyl cis-trans isomerase [Beta vulgaris subsp. vulgaris]	731357859	1	2078.97	19				85.9		23.3		890.8						101466		16036.2		1.49241e+06						288299			78181.6
FALSE		High	Unambiguous	MSVLIEGLPDAVALR	[-].MSVLIEGLPDAVALR.[C]	1xMet-loss+Acetyl [N-Term]	1xMet-loss+Acetyl [N-Term]	6.18702e-05	5.15092e-05	1.296	1	1	1	1108927516	1108927516 [1-15]	1108927516 1xMet-loss+Acetyl [N-Term]	1108927516 1xMet-loss+Acetyl [N-Term]	PREDICTED: F-box/kelch-repeat protein SKIP30 [Beta vulgaris subsp. vulgaris]	1108927516	0	1494.85	15					102.2		798.8	99.1							418547		2.44285e+06	332263							686267
FALSE		High	Unambiguous	MSVIDILTR	[-].MSVIDILTR.[V]	1xMet-loss+Acetyl [N-Term]	1xMet-loss+Acetyl [N-Term]	0.000719869	5.15092e-05	0.972	1	1	5	731345816	731345816 [1-9]	731345816 1xMet-loss+Acetyl [N-Term]	731345816 1xMet-loss+Acetyl [N-Term]	PREDICTED: syntaxin-71 [Beta vulgaris subsp. vulgaris]	731345816	0	958.557	9	59.9		111.3	165.8		64.7	127.2	206	100.6	164.5	283393		310743	596356		135662	591893	1.05082e+06	600738	1.68115e+06	611696		1.13714e+06	1.69446e+06			661398
FALSE		High	Unambiguous	MSVGELACTYAALLLHDDSVAITAEK	[-].MSVGELACTYAALLLHDDSVAITAEK.[I]	1xCarbamidomethyl [C8]; 1xMet-loss+Acetyl [N-Term]	1xCarbamidomethyl [C8]; 1xMet-loss+Acetyl [N-Term]	1.73568e-15	5.15092e-05	4.503	1	1	66	731311102	731311102 [1-26]	731311102 1xMet-loss+Acetyl [N-Term]	731311102 1xMet-loss+Acetyl [N-Term]	PREDICTED: 60S acidic ribosomal protein P1 [Beta vulgaris subsp. vulgaris]	731311102	0	2689.34	26	132.8	62.6	81.3	68.3	318.8	74.4	56.6	110.2	53.8	41.3	1.51779e+08	5.88349e+07	5.48044e+07	59341056	4.79687e+08	3.76603e+07	6.3554e+07	1.35811e+08	7.74975e+07	1.01799e+08	3.27612e+08	1.54395e+08	2.00553e+08	1.68609e+08	7.86516e+08		1.83607e+08
FALSE		High	Unambiguous	MSTVFNGDETAPFFGFLGAAAALVFSCMGAAYGTAK	[-].MSTVFNGDETAPFFGFLGAAAALVFSCMGAAYGTAK.[S]	1xCarbamidomethyl [C27]; 1xMet-loss+Acetyl [N-Term]	1xCarbamidomethyl [C27]; 1xMet-loss+Acetyl [N-Term]	1.01067e-07	5.15092e-05	2.143	1	1	5	731376970	731376970 [1-36]	731376970 1xMet-loss+Acetyl [N-Term]	731376970 1xMet-loss+Acetyl [N-Term]	PREDICTED: V-type proton ATPase 16 kDa proteolipid subunit [Beta vulgaris subsp. vulgaris]	731376970	0	3588.68	36	704.5	96.3		40.8			89.9	68.5			12475034	1.4022e+06		548566			1565059	1.30692e+06			2.69271e+07	3.67968e+06		1.55867e+06
FALSE		High	Unambiguous	MSTSATPLLKDELDIIIPTIR	[-].MSTSATPLLKDELDIIIPTIR.[N]	1xMet-loss+Acetyl [N-Term]	1xMet-loss+Acetyl [N-Term]	1.30684e-08	5.15092e-05	2.413	1	1	11	731316072	731316072 [1-21]	731316072 1xMet-loss+Acetyl [N-Term]	731316072 1xMet-loss+Acetyl [N-Term]	PREDICTED: alpha-1,4-glucan-protein synthase [UDP-forming] 2 [Beta vulgaris subsp. vulgaris]	731316072	1	2238.26	21				191.6	155.9		161.5	184.2	193.2	113.4				2.7395e+06	3.86253e+06		2.98667e+06	3.73631e+06	4.58607e+06	4.60701e+06				7.78389e+06	6.33317e+06
FALSE		High	Unambiguous	MSTMESLIGLVNR	[-].MSTMESLIGLVNR.[I]	1xOxidation [M4]; 1xMet-loss+Acetyl [N-Term]	1xOxidation [M4]; 1xMet-loss+Acetyl [N-Term]	0.000232925	5.15092e-05	1.121	1	1	4	731360727	731360727 [1-13]	731360727 1xMet-loss+Acetyl [N-Term]	731360727 1xMet-loss+Acetyl [N-Term]	PREDICTED: dynamin-related protein 1E [Beta vulgaris subsp. vulgaris]	731360727	0	1377.7	13	49.8		131.2	129.2	181	146.9	177.7	71.4	43.3	69.5	296629		461259	585035	1.4204e+06	387626	1.04105e+06	458604	325616	893661	640267		1.68795e+06	1.66229e+06	2.32895e+06		1.8898e+06
FALSE		High	Unambiguous	MSTMESLIGLVNR	[-].MSTMESLIGLVNR.[I]	1xMet-loss+Acetyl [N-Term]	1xMet-loss+Acetyl [N-Term]	1.43291e-06	5.15092e-05	1.793	1	1	6	731360727	731360727 [1-13]	731360727 1xMet-loss+Acetyl [N-Term]	731360727 1xMet-loss+Acetyl [N-Term]	PREDICTED: dynamin-related protein 1E [Beta vulgaris subsp. vulgaris]	731360727	0	1361.71	13	36.4		72.6	42.8	5.7	88.6	180.3	228.9	159.3	185.3	1.08197e+06		1.27494e+06	967206	223417	1.16756e+06	5.27208e+06	7.34095e+06	5.97692e+06	1.19034e+07	2.33541e+06		4.66555e+06	2.74817e+06	366325		5.69223e+06
FALSE		High	Unambiguous	MSVQDAISLFESR	[R].MSVQDAISLFESR.[Q]			1.82603e-06	5.15092e-05	1.761	1	1	3	731319004	731319004 [351-363]			PREDICTED: serine/arginine repetitive matrix protein 1 [Beta vulgaris subsp. vulgaris]	731319004	0	1482.73	13	49.7	11.5		43.1		258.7	238.9	198.3	91.1	108.6	325531	61684.6		214281		749664	1.53655e+06	1.3988e+06	751774	1.53444e+06	702650	161873		608848			3.65486e+06
FALSE		High	Unambiguous	MSTIDEPLYPIAVLIDELKNDDIQLR	[-].MSTIDEPLYPIAVLIDELKNDDIQLR.[L]	1xMet-loss+Acetyl [N-Term]	1xMet-loss+Acetyl [N-Term]	5.66923e-12	5.15092e-05	3.435	1	1	18	731340802	731340802 [1-26]	731340802 1xMet-loss+Acetyl [N-Term]	731340802 1xMet-loss+Acetyl [N-Term]	PREDICTED: serine/threonine-protein phosphatase 2A 65 kDa regulatory subunit A beta isoform [Beta vulgaris subsp. vulgaris]	731340802	1	2925.55	26	79.7	79.8	250.1	170.8	10.5	41.8	150	104.2	112.9		3.72836e+06	3.06941e+06	6.89858e+06	6068366	649020	866377	6.89381e+06	5.2524e+06	6656267		8.04759e+06	8.05478e+06	2.5245e+07	1.72424e+07	1.06416e+06		4.22388e+06
FALSE		High	Unambiguous	MSTGYNILTR	[R].MSTGYNILTR.[D]			1.48823e-06	5.15092e-05	1.788	1	1	33	731361266	731361266 [35-44]			PREDICTED: proteasome subunit beta type-1 [Beta vulgaris subsp. vulgaris]	731361266	0	1155.58	10	55.1	32.1	129	75.6	18.4	131.8	102.2	112.7	164.4	178.7	6.65024e+06	3.18655e+06	9.17862e+06	6.92319e+06	2.91431e+06	7.03645e+06	1.21049e+07	1.46449e+07	2.50082e+07	4.6506e+07	1.43544e+07	8.3622e+06	3.35886e+07	1.96712e+07	4.77842e+06		3.4305e+07
FALSE		High	Unambiguous	MSTGELLNIEPLELKFPFELKK	[-].MSTGELLNIEPLELKFPFELKK.[Q]	1xMet-loss+Acetyl [N-Term]	1xMet-loss+Acetyl [N-Term]	2.13968e-07	5.15092e-05	2.044	1	1	8	731366608	731366608 [1-22]	731366608 1xMet-loss+Acetyl [N-Term]	731366608 1xMet-loss+Acetyl [N-Term]	PREDICTED: vesicle-associated protein 1-1 [Beta vulgaris subsp. vulgaris]	731366608	2	2487.37	22	104.3	124.7				196.5	249.4	64.2	132.8	128.1	2.64112e+06	2595720				2.20259e+06	6.20587e+06	1.75139e+06	4.24138e+06	6997672	5.7008e+06	6.81173e+06					1.07384e+07
FALSE		High	Unambiguous	MSTGELLNIEPLELK	[-].MSTGELLNIEPLELK.[F]	1xMet-loss+Acetyl [N-Term]	1xMet-loss+Acetyl [N-Term]	0.00153427	5.15092e-05	0.872	1	1	3	731366608	731366608 [1-15]	731366608 1xMet-loss+Acetyl [N-Term]	731366608 1xMet-loss+Acetyl [N-Term]	PREDICTED: vesicle-associated protein 1-1 [Beta vulgaris subsp. vulgaris]	731366608	0	1597.87	15		306.5	231.5	82.4	379.7							1.00405e+06	543880	249358	1.99079e+06							2.63484e+06	1.9903e+06	708515	3.26418e+06
FALSE		High	Unambiguous	MSTGDLVHIEPTELKFPFELRK	[-].MSTGDLVHIEPTELKFPFELRK.[Q]	1xMet-loss+Acetyl [N-Term]	1xMet-loss+Acetyl [N-Term]	2.81385e-05	5.15092e-05	1.4	1	1	5	731361106	731361106 [1-22]	731361106 1xMet-loss+Acetyl [N-Term]	731361106 1xMet-loss+Acetyl [N-Term]	PREDICTED: vesicle-associated protein 1-3 [Beta vulgaris subsp. vulgaris]	731361106	2	2498.33	22		90.5		362			244.2	269	2.7	31.6		1.38255e+06		5.1066e+06			4.457e+06	5.3836e+06	62645	1.26706e+06		3.6281e+06		1.45096e+07
FALSE		High	Unambiguous	MSTGDLVHIEPTELKFPFELR	[-].MSTGDLVHIEPTELKFPFELR.[K]	1xMet-loss+Acetyl [N-Term]	1xMet-loss+Acetyl [N-Term]	1.99982e-06	5.15092e-05	1.749	1	1	7	731361106	731361106 [1-21]	731361106 1xMet-loss+Acetyl [N-Term]	731361106 1xMet-loss+Acetyl [N-Term]	PREDICTED: vesicle-associated protein 1-3 [Beta vulgaris subsp. vulgaris]	731361106	1	2370.23	21			112			358.1	122.9	266.2	82.4	58.4			1.76388e+06			4235217	3.22557e+06	7.66247e+06	2.77754e+06	3.36989e+06			6.45482e+06				2.06481e+07
FALSE		High	Unambiguous	MSTGDLVHIEPTELK	[-].MSTGDLVHIEPTELK.[F]	1xMet-loss+Acetyl [N-Term]	1xMet-loss+Acetyl [N-Term]	0.000238278	5.15092e-05	1.118	1	1	1	731361106	731361106 [1-15]	731361106 1xMet-loss+Acetyl [N-Term]	731361106 1xMet-loss+Acetyl [N-Term]	PREDICTED: vesicle-associated protein 1-3 [Beta vulgaris subsp. vulgaris]	731361106	0	1580.82	15			173.8	522.6				303.6					158585	614227				506217					580332	1.74524e+06
FALSE		High	Unambiguous	MSTFDEFRPLDEKSLVEYIK	[-].MSTFDEFRPLDEKSLVEYIK.[A]	1xMet-loss+Acetyl [N-Term]	1xMet-loss+Acetyl [N-Term]	6.92789e-06	5.15092e-05	1.585	1	1	2	731360156	731360156 [1-20]	731360156 1xMet-loss+Acetyl [N-Term]	731360156 1xMet-loss+Acetyl [N-Term]	PREDICTED: methylthioribose kinase [Beta vulgaris subsp. vulgaris]	731360156	1	2358.19	20				29.2		148.7	263.7	194	124.2	240.2				204554		606202	2.3862e+06	1.92583e+06	1.44238e+06	4775917				581210			2.95543e+06
FALSE		High	Unambiguous	MSTGYNILTRDYSK	[R].MSTGYNILTRDYSK.[I]			4.63933e-05	5.15092e-05	1.334	1	1	2	731361266	731361266 [35-48]			PREDICTED: proteasome subunit beta type-1 [Beta vulgaris subsp. vulgaris]	731361266	1	1648.8	14	15.3	5.9	62.2	87.5	12.1	187.7	277.4	238	114		79601.6	25056.1	190577	345026	82777.9	431507	1.41564e+06	1.33213e+06	746706		171818	65752.6	697406	980340	135726		2.10374e+06
FALSE		High	Unambiguous	MSTFDEFRPLDEK	[-].MSTFDEFRPLDEK.[S]	1xMet-loss+Acetyl [N-Term]	1xMet-loss+Acetyl [N-Term]	0.000103563	5.15092e-05	1.228	1	1	4	731360156	731360156 [1-13]	731360156 1xMet-loss+Acetyl [N-Term]	731360156 1xMet-loss+Acetyl [N-Term]	PREDICTED: methylthioribose kinase [Beta vulgaris subsp. vulgaris]	731360156	0	1525.72	13		22.6		101.9	231.3	45.5	225	158.2	157.9	57.6		120378		501388	1.97191e+06	130606	1.43211e+06	1.10415e+06	1.28981e+06	805385		315899		1.42462e+06	3.23322e+06		636746
FALSE		High	Unambiguous	MSVQEYLEKHLLSR	[-].MSVQEYLEKHLLSR.[K]	1xMet-loss+Acetyl [N-Term]	1xMet-loss+Acetyl [N-Term]	1.26932e-06	5.15092e-05	1.809	1	1	4	731348742	731348742 [1-14]	731348742 1xMet-loss+Acetyl [N-Term]	731348742 1xMet-loss+Acetyl [N-Term]	PREDICTED: cytosolic enolase 3 [Beta vulgaris subsp. vulgaris]	731348742	1	1643.88	14				31.4	2.7	129.5	284.8	207.1	170.2	174.4				267751	39601.6	643680	3.1437e+06	2.5065e+06	2.41045e+06	4.22739e+06				760774	64932.4		3.13815e+06
FALSE		High	Unambiguous	MSVSLRDLDPAFQGAGQKAGLEIWR	[-].MSVSLRDLDPAFQGAGQKAGLEIWR.[I]	1xMet-loss+Acetyl [N-Term]	1xMet-loss+Acetyl [N-Term]	1.01954e-05	5.15092e-05	1.534	1	1	1	731354182	731354182 [1-25]	731354182 1xMet-loss+Acetyl [N-Term]	731354182 1xMet-loss+Acetyl [N-Term]	PREDICTED: villin-4 [Beta vulgaris subsp. vulgaris]	731354182	2	2656.38	25
FALSE		High	Unambiguous	MTDAEELTVEERNLLSVAYK	[K].MTDAEELTVEERNLLSVAYK.[N]			6.61616e-07	5.15092e-05	1.895	1	1	2	731315739	731315739 [36-55]			PREDICTED: 14-3-3-like protein [Beta vulgaris subsp. vulgaris]	731315739	1	2311.15	20				38.6		44.9	191.7	228.9	199.3	296.7				309900		210285	1.99317e+06	2.61024e+06	2.65964e+06	6775796				880536			1.02521e+06
FALSE		High	Unambiguous	MTDAEELTVEER	[K].MTDAEELTVEER.[N]	1xOxidation [M1]	1xOxidation [M1]	5.39833e-05	5.15092e-05	1.314	1	1	2	731315739	731315739 [36-47]			PREDICTED: 14-3-3-like protein [Beta vulgaris subsp. vulgaris]	731315739	0	1438.64	12				638.1	361.9									576446	566567									1.63789e+06	928967
FALSE		High	Unambiguous	MTDAEELTVEER	[K].MTDAEELTVEER.[N]			1.18496e-07	5.15092e-05	2.122	1	1	26	731315739	731315739 [36-47]			PREDICTED: 14-3-3-like protein [Beta vulgaris subsp. vulgaris]	731315739	0	1422.64	12	35.8	9.3	122.2	170.5	65	60	124.6	109.5	113.2	190	4.49782e+06	966257	9.05632e+06	1.62733e+07	1.07461e+07	3.33569e+06	1.53853e+07	1.48275e+07	1.79401e+07	5.15264e+07	9.70844e+06	2.53567e+06	3.31411e+07	4.62381e+07	1.76197e+07		1.62626e+07
FALSE		High	Unambiguous	MTAYRGKYADELIANAAYIATPGK	[-].MTAYRGKYADELIANAAYIATPGK.[G]	1xMet-loss+Acetyl [N-Term]	1xMet-loss+Acetyl [N-Term]	4.32607e-08	5.15092e-05	2.255	1	1	4	731345323	731345323 [1-24]	731345323 1xMet-loss+Acetyl [N-Term]	731345323 1xMet-loss+Acetyl [N-Term]	PREDICTED: fructose-bisphosphate aldolase, cytoplasmic isozyme [Beta vulgaris subsp. vulgaris]	731345323	2	2499.29	24						144.5	11.7	552.4		291.4						1.46279e+06	261902	1.36157e+07		1.43853e+07							7.1316e+06
FALSE		High	Unambiguous	MTAREFDSLDSDGGPGPAR	[R].MTAREFDSLDSDGGPGPAR.[S]			1.23143e-06	5.15092e-05	1.813	1	1	1	731325784	731325784 [76-94]			PREDICTED: RNA-binding protein 8A [Beta vulgaris subsp. vulgaris]	731325784	1	1978.89	19	13.4	5.8	11.7		24.9	111		674.1	137.1	22	65629.9	23311.6	33883.9		161254	241238		3.56718e+06	849241	233062	141660	61174.7	123996		264399		1.17611e+06
FALSE		High	Unambiguous	MTAIEELAGMDVLCSDKTGTLTLNK	[R].MTAIEELAGMDVLCSDKTGTLTLNK.[L]	1xCarbamidomethyl [C14]	1xCarbamidomethyl [C14]	1.23862e-09	5.15092e-05	2.724	1	1	5	731354199	731354199 [317-341]			PREDICTED: plasma membrane ATPase 4 [Beta vulgaris subsp. vulgaris]	731354199	1	2711.33	25	185.1	180.5		171.7	136.1	97.1		5	56.6	167.8	4.08073e+06	3273586		2.87612e+06	3948763	948059		117714	1.57358e+06	7.98639e+06	8.80815e+06	8.59059e+06		8.17206e+06	6.47456e+06		4.6221e+06
FALSE		High	Unambiguous	MTAIEELAGMDVLCSDK	[R].MTAIEELAGMDVLCSDK.[T]	1xCarbamidomethyl [C14]	1xCarbamidomethyl [C14]	3.9249e-06	5.15092e-05	1.66	1	1	3	731354199	731354199 [317-333]			PREDICTED: plasma membrane ATPase 4 [Beta vulgaris subsp. vulgaris]	731354199	0	1882.86	17	282.4			90.5	472.8		62		92.2		2.22669e+06			542079	4.90706e+06		480444		916658		4.80626e+06			1.54024e+06	8.04583e+06
FALSE		High	Unambiguous	MSVSLRDLDPAFQGAGQK	[-].MSVSLRDLDPAFQGAGQK.[A]	1xMet-loss+Acetyl [N-Term]	1xMet-loss+Acetyl [N-Term]	1.86908e-05	5.15092e-05	1.454	1	1	3	731354182	731354182 [1-18]	731354182 1xMet-loss+Acetyl [N-Term]	731354182 1xMet-loss+Acetyl [N-Term]	PREDICTED: villin-4 [Beta vulgaris subsp. vulgaris]	731354182	1	1830.93	18	20.3		6.8			31.4	207.3	251	228.1	255.2	97526		19379.2			66978.1	980812	1.30243e+06	1.38486e+06	2.65184e+06	210507		70916.8				326540
FALSE		High	Unambiguous	MTAECGDKVQVVGDDLLVTNPK	[K].MTAECGDKVQVVGDDLLVTNPK.[R]	1xCarbamidomethyl [C5]; 1xOxidation [M1]	1xCarbamidomethyl [C5]; 1xOxidation [M1]	2.07216e-10	5.15092e-05	2.96	1	1	16	731345370	731345370 [314-335]			PREDICTED: enolase [Beta vulgaris subsp. vulgaris]	731345370	1	2405.17	22	84.3	6.4	88.6	101.7	72.5	237.5	80.8	173	65.5	89.7	3.21007e+06	201923	1.99026e+06	2.94137e+06	3.63287e+06	4.00377e+06	3.0227e+06	7.09848e+06	3.14551e+06	7.37448e+06	6.92885e+06	529889	7.28322e+06	8.35746e+06	5.95661e+06		1.95197e+07
FALSE		High	Unambiguous	MTADIYVTAAFK	[-].MTADIYVTAAFK.[S]	1xMet-loss+Acetyl [N-Term]	1xMet-loss+Acetyl [N-Term]	4.36153e-07	5.15092e-05	1.95	1	1	10	731313066	731313066 [1-12]	731313066 1xMet-loss+Acetyl [N-Term]	731313066 1xMet-loss+Acetyl [N-Term]	PREDICTED: albumin-2 [Beta vulgaris subsp. vulgaris]	731313066	0	1241.64	12	101.2	7.3	111	191	88	47.7	112.2	120.6	106.6	114.4	1.68626e+06	100492	1.09151e+06	2.41902e+06	1.93031e+06	352175	1.83711e+06	2.16736e+06	2.24057e+06	4.11498e+06	3.63976e+06	263712	3.9943e+06	6.8733e+06	3.16503e+06		1.71697e+06
FALSE		High	Unambiguous	MTADIYVTAAFK	[-].MTADIYVTAAFK.[S]	1xMet-loss [N-Term]	1xMet-loss [N-Term]	3.37495e-05	5.15092e-05	1.376	1	1	12	731313066	731313066 [1-12]	731313066 1xMet-loss [N-Term]	731313066 1xMet-loss [N-Term]	PREDICTED: albumin-2 [Beta vulgaris subsp. vulgaris]	731313066	0	1199.63	12	201.6	68.5	154.5	211.8	26.8	43	42.7	70.9	92.9	87.3	1.64725e+07	4.60674e+06	7.44891e+06	1.31481e+07	2.88175e+06	1.55591e+06	3.43039e+06	6.24123e+06	9.57577e+06	1.5396e+07	3.55556e+07	1.20891e+07	2.72588e+07	3.73583e+07	4.72503e+06		7.58559e+06
FALSE		High	Unambiguous	MSYGESQMLDKAFYEEEVKR	[K].MSYGESQMLDKAFYEEEVKR.[H]			2.62839e-05	5.15092e-05	1.409	1	1	2	731363237	731363237 [281-300]			PREDICTED: V-type proton ATPase subunit d2 [Beta vulgaris subsp. vulgaris]	731363237	2	2440.12	20					56.4	17.7	187.5	302.1	245.4	190.8					245237	25899.5	609187	1.07629e+06	1.0231e+06	1361588					402101		126268
FALSE		High	Unambiguous	MSYGESQMLDK	[K].MSYGESQMLDK.[A]			0.000959785	5.15092e-05	0.934	1	1	4	731363237	731363237 [281-291]			PREDICTED: V-type proton ATPase subunit d2 [Beta vulgaris subsp. vulgaris]	731363237	0	1288.55	11	20.1		140.8	184.5	2.6	39.7	109.7	150.2	110.7	241.6	222125		917275	1547367	38389.4	194090	1190640	1.78692e+06	1.54145e+06	5.7579e+06	479451		3.35671e+06	4.39661e+06	62944.9		946251
FALSE		High	Unambiguous	MSWWWAGAIGAAK	[-].MSWWWAGAIGAAK.[K]	1xMet-loss+Acetyl [N-Term]	1xMet-loss+Acetyl [N-Term]	9.52832e-05	5.15092e-05	1.239	1	1	3	731325664	731325664 [1-13]	731325664 1xMet-loss+Acetyl [N-Term]	731325664 1xMet-loss+Acetyl [N-Term]	PREDICTED: 3-oxo-Delta(4,5)-steroid 5-beta-reductase [Beta vulgaris subsp. vulgaris]	731325664	0	1345.67	13	34.9		21	92.8	350.4	140.5	155.7	43.7	89.7	71.2	281279		99669	567672	3713969	500971	1.23199e+06	379216	911378	1.23786e+06	607134		364733	1.61296e+06	6.08958e+06		2.4424e+06
FALSE		High	Unambiguous	MSWCTIESDPGVFTELIQQMQVK	[-].MSWCTIESDPGVFTELIQQMQVK.[G]	1xCarbamidomethyl [C4]; 1xMet-loss+Acetyl [N-Term]	1xCarbamidomethyl [C4]; 1xMet-loss+Acetyl [N-Term]	2.92249e-05	5.15092e-05	1.395	1	1	3	731330717	731330717 [1-23]	731330717 1xMet-loss+Acetyl [N-Term]	731330717 1xMet-loss+Acetyl [N-Term]	PREDICTED: ubiquitin carboxyl-terminal hydrolase 2 [Beta vulgaris subsp. vulgaris]	731330717	0	2638.25	23	87.7			25.9			212.9	248	385.9	39.6	678855			152477			1.61883e+06	2.06799e+06	3.7669e+06	660764	1.46529e+06			433242
FALSE		High	Unambiguous	MSVVGFDFGNESCVVAVAR	[-].MSVVGFDFGNESCVVAVAR.[Q]	1xCarbamidomethyl [C13]; 1xMet-loss+Acetyl [N-Term]	1xCarbamidomethyl [C13]; 1xMet-loss+Acetyl [N-Term]	1.14892e-08	5.15092e-05	2.43	1	1	6	731359455	731359455 [1-19]	731359455 1xMet-loss+Acetyl [N-Term]	731359455 1xMet-loss+Acetyl [N-Term]	PREDICTED: heat shock 70 kDa protein 15 [Beta vulgaris subsp. vulgaris]	731359455	0	1954.93	19			168.6	149.8	6.6	90.6	160.7	151.6	49.8	222.3			908793	1.03958e+06	79351.4	366364	1.44291e+06	1.49326e+06	573457	4.3853e+06			3.32567e+06	2.9538e+06	130108		1.78615e+06
FALSE		High	Unambiguous	MTAECGDKVQVVGDDLLVTNPK	[K].MTAECGDKVQVVGDDLLVTNPK.[R]	1xCarbamidomethyl [C5]	1xCarbamidomethyl [C5]	5.88811e-12	5.15092e-05	3.43	1	1	58	731345370	731345370 [314-335]			PREDICTED: enolase [Beta vulgaris subsp. vulgaris]	731345370	1	2389.17	22	40.3	41	50	64.6	25.2	81.7	175.1	243.9	77.5	200.7	2.23162e+07	1.87072e+07	1.63454e+07	2.72016e+07	1.83977e+07	2.00519e+07	9.53799e+07	1.45678e+08	5.41743e+07	240140741	4.81689e+07	4.90917e+07	5.9815e+07	7.72892e+07	3.01656e+07		9.77597e+07
FALSE		High	Unambiguous	MSTFAKPENALK	[-].MSTFAKPENALK.[R]	1xMet-loss+Acetyl [N-Term]	1xMet-loss+Acetyl [N-Term]	7.36469e-05	5.15092e-05	1.273	1	1	5	731326606	731326606 [1-12]	731326606 1xMet-loss+Acetyl [N-Term]	731326606 1xMet-loss+Acetyl [N-Term]	PREDICTED: eukaryotic translation initiation factor 3 subunit A [Beta vulgaris subsp. vulgaris]	731326606	0	1247.66	12	20.4	8.4	77	324.5	29.4	20.1	178.9	94.1	90.3	156.8	209476	71136	467200	2.53558e+06	398701	91393.2	1.8084e+06	1.04326e+06	1.17197e+06	3.48103e+06	452150	186676	1.70969e+06	7.20448e+06	653727		445572
FALSE		High	Unambiguous	MSTEKERETQVYLAK	[-].MSTEKERETQVYLAK.[L]	1xMet-loss+Acetyl [N-Term]	1xMet-loss+Acetyl [N-Term]	7.68957e-09	5.15092e-05	2.483	1	1	10	731339186	731339186 [1-15]	731339186 1xMet-loss+Acetyl [N-Term]	731339186 1xMet-loss+Acetyl [N-Term]	PREDICTED: 14-3-3-like protein GF14 iota [Beta vulgaris subsp. vulgaris]	731339186	2	1723.89	15	2.3	6.5	39.1	24.1		404.6	156.1	80	122.5	164.9	93573.6	223215	958068	759401		7435397	6.36715e+06	3.57743e+06	6.41109e+06	14780024	201976	585764	3.50599e+06	2.15772e+06			3.625e+07
FALSE		High	Unambiguous	MSTDIPFILDALESSR	[R].MSTDIPFILDALESSR.[A]			8.76649e-05	5.15092e-05	1.25	1	2	1	731355848	731355848 [350-365]			PREDICTED: la-related protein 1A isoform X1 [Beta vulgaris subsp. vulgaris]	731355848; 731355852	0	1794.89	16	118	100.1				297.7		288.6		195.5	204308	142496				228093		538406		730472	440994	373940					1.11203e+06
FALSE		High	Unambiguous	MSQTVVLNVAMTCKGCSGAVK	[-].MSQTVVLNVAMTCKGCSGAVK.[R]	2xCarbamidomethyl [C13; C16]; 1xMet-loss+Acetyl [N-Term]	2xCarbamidomethyl [C13; C16]; 1xMet-loss+Acetyl [N-Term]	2.44943e-09	5.15092e-05	2.634	1	1	3	731365775	731365775 [1-21]	731365775 1xMet-loss+Acetyl [N-Term]	731365775 1xMet-loss+Acetyl [N-Term]	PREDICTED: copper transport protein ATX1 [Beta vulgaris subsp. vulgaris]	731365775	1	2152.06	21		16				183.1	85	124.3	102.5	489.1		38582				238212	245500	393623	379702	3.1015e+06		101247					1.16136e+06
FALSE		High	Unambiguous	MSQTVVLNVAMTCK	[-].MSQTVVLNVAMTCK.[G]	1xCarbamidomethyl [C13]; 1xOxidation [M11]; 1xMet-loss+Acetyl [N-Term]	1xCarbamidomethyl [C13]; 1xOxidation [M11]; 1xMet-loss+Acetyl [N-Term]	5.90543e-07	5.15092e-05	1.91	1	1	8	731365775	731365775 [1-14]	731365775 1xMet-loss+Acetyl [N-Term]	731365775 1xMet-loss+Acetyl [N-Term]	PREDICTED: copper transport protein ATX1 [Beta vulgaris subsp. vulgaris]	731365775	0	1508.74	14	64.3	1.3	158.4	141.7	1.4	160.5	72	93.2	107.2	200	2.02021e+06	33403.2	2.93574e+06	3.38305e+06	57452	2.23316e+06	2.22398e+06	3.15649e+06	4.24869e+06	1.35643e+07	4.36057e+06	87657	1.07432e+07	9.61243e+06	94200.7		1.08874e+07
FALSE		High	Unambiguous	MSQTVVLNVAMTCK	[-].MSQTVVLNVAMTCK.[G]	1xCarbamidomethyl [C13]; 1xMet-loss+Acetyl [N-Term]	1xCarbamidomethyl [C13]; 1xMet-loss+Acetyl [N-Term]	1.17602e-07	5.15092e-05	2.123	1	1	19	731365775	731365775 [1-14]	731365775 1xMet-loss+Acetyl [N-Term]	731365775 1xMet-loss+Acetyl [N-Term]	PREDICTED: copper transport protein ATX1 [Beta vulgaris subsp. vulgaris]	731365775	0	1492.75	14	36.5		1	79.1	2.5	79.2	163.7	256.5	206.2	175.3	3.20296e+06		50620.2	5.2674e+06	288982	3.07527e+06	1.41093e+07	24248209	2.28121e+07	3.31881e+07	6.91352e+06		185241	1.49665e+07	473827		1.4993e+07
FALSE		High	Unambiguous	MSQPSVVTNQSPTTEVSVTSR	[-].MSQPSVVTNQSPTTEVSVTSR.[T]	1xMet-loss+Acetyl [N-Term]	1xMet-loss+Acetyl [N-Term]	2.30944e-06	5.15092e-05	1.73	1	1	4	731328641	731328641 [1-21]	731328641 1xMet-loss+Acetyl [N-Term]	731328641 1xMet-loss+Acetyl [N-Term]	PREDICTED: methyl-CpG-binding domain-containing protein 4 [Beta vulgaris subsp. vulgaris]	731328641	0	2146.06	21	33.4		76.9	74.7	31	61.3	71.3	189.3	192.3	269.8	282737		383599	480358	344745	229729	592473	1.72636e+06	2.05226e+06	4.92803e+06	610280		1.40376e+06	1.36487e+06	565259		1.12e+06
FALSE		High	Unambiguous	MSQLSVLTGSQGEIR	[K].MSQLSVLTGSQGEIR.[A]			1.75916e-05	5.15092e-05	1.462	2	2	8	731313633; 731313635	731313633 [304-318]; 731313635 [307-321]			PREDICTED: peroxidase 12 [Beta vulgaris subsp. vulgaris] PREDICTED: peroxidase 12 [Beta vulgaris subsp. vulgaris]	731313633; 731313635	0	1605.83	15	43	27.3	104.3	191.1	23.8	60	80.6	126.7	213.1	130.2	2.5907e+06	1.35102e+06	3.70233e+06	8.73868e+06	1.88894e+06	1.59855e+06	4.76698e+06	8.22121e+06	1.61813e+07	1.69132e+07	5.59196e+06	3.54536e+06	1.35485e+07	2.48297e+07	3.09718e+06		7.79348e+06
FALSE		High	Unambiguous	MSQISEMQYQSIKPR	[-].MSQISEMQYQSIKPR.[D]	1xMet-loss+Acetyl [N-Term]	1xMet-loss+Acetyl [N-Term]	4.3947e-07	5.15092e-05	1.949	1	1	2	731330135	731330135 [1-15]	731330135 1xMet-loss+Acetyl [N-Term]	731330135 1xMet-loss+Acetyl [N-Term]	PREDICTED: acetyl-CoA acetyltransferase, cytosolic 1 [Beta vulgaris subsp. vulgaris]	731330135	0	1736.86	15			91.6	46.7		36	91.4	457.5	70.7	206.2			238973	156883		70432	397471	2.18129e+06	394462	1968579			874508	445759			343379
FALSE		High	Unambiguous	MIADVSKSDKIVVEK	[R].MIADVSKSDKIVVEK.[S]	1xGG [K7]	1xGG [K7]	0.00533253	0.000145442	0.707	1	1	1	1108977069	1108977069 [112-126]			PREDICTED: UDP-glucose 6-dehydrogenase 1 [Beta vulgaris subsp. vulgaris]	1108977069	2	1775.96	15
FALSE		High	Unambiguous	MSQTVVLNVAMTCKGCSGAVKR	[-].MSQTVVLNVAMTCKGCSGAVKR.[V]	2xCarbamidomethyl [C13; C16]; 1xMet-loss+Acetyl [N-Term]	2xCarbamidomethyl [C13; C16]; 1xMet-loss+Acetyl [N-Term]	1.96282e-12	5.15092e-05	3.575	1	1	8	731365775	731365775 [1-22]	731365775 1xMet-loss+Acetyl [N-Term]	731365775 1xMet-loss+Acetyl [N-Term]	PREDICTED: copper transport protein ATX1 [Beta vulgaris subsp. vulgaris]	731365775	2	2308.16	22	1.4	1.4	2.7	10.6	11.6	94.3	274.3	253.4	46.9	303.4	67622.5	56062.2	78114.4	389847	739914	2.02517e+06	1.30807e+07	1.32499e+07	2.87047e+06	3.17808e+07	145961	147119	285855	1.10769e+06	1.21319e+06		9.87337e+06
FALSE		High	Unambiguous	MSQHESSTITIQEPK	[-].MSQHESSTITIQEPK.[S]	1xMet-loss+Acetyl [N-Term]	1xMet-loss+Acetyl [N-Term]	9.22836e-08	5.15092e-05	2.155	1	1	5	731324078	731324078 [1-15]	731324078 1xMet-loss+Acetyl [N-Term]	731324078 1xMet-loss+Acetyl [N-Term]	PREDICTED: casparian strip membrane protein 3 [Beta vulgaris subsp. vulgaris]	731324078	0	1626.8	15	27.7		241.5	150.3		66	93.4	152.6	76.1	192.4	148330		763880	612321		156613	491912	882023	514699	2.22713e+06	320167		2.79537e+06	1.73982e+06			763541
FALSE		High	Unambiguous	MSQGTLEVLLVSAK	[-].MSQGTLEVLLVSAK.[G]	1xMet-loss+Acetyl [N-Term]	1xMet-loss+Acetyl [N-Term]	8.68565e-08	5.15092e-05	2.163	1	1	7	731311927	731311927 [1-14]	731311927 1xMet-loss+Acetyl [N-Term]	731311927 1xMet-loss+Acetyl [N-Term]	PREDICTED: elicitor-responsive protein 3 [Beta vulgaris subsp. vulgaris]	731311927	0	1386.78	14	18					103.5	148.5	332.6	192.9	204.5	318086					809996	2.57823e+06	6.33334e+06	4.29928e+06	7798401	686582						3.949e+06
FALSE		High	Unambiguous	MSPTAAAIRPLVTIQTIGSDMSTDTPQTLPLADVMK	[-].MSPTAAAIRPLVTIQTIGSDMSTDTPQTLPLADVMK.[A]	1xMet-loss [N-Term]	1xMet-loss [N-Term]	1.90535e-11	5.15092e-05	3.275	1	1	5	731335706	731335706 [1-36]	731335706 1xMet-loss [N-Term]	731335706 1xMet-loss [N-Term]	PREDICTED: 60S ribosomal protein L4 [Beta vulgaris subsp. vulgaris]	731335706	0	3639.9	36	278.2		209.9	301.5			108.2		102.2		3.47521e+06		1.54637e+06	2.86094e+06			1.32774e+06		1610551		7.50116e+06		5.65886e+06	8.12893e+06
FALSE		High	Unambiguous	MSPPIEWYNVPEGTK	[R].MSPPIEWYNVPEGTK.[S]			1.49954e-06	5.15092e-05	1.787	1	1	5	731331688	731331688 [40-54]			PREDICTED: uncharacterized protein LOC104892530 [Beta vulgaris subsp. vulgaris]	731331688	0	1747.84	15			43.2	6.8			129.1	337.7	233.8	249.4			242935	48958.9			1210583	3.47189e+06	2.81239e+06	5.13501e+06			889006	139109
FALSE		High	Unambiguous	MSPLVSNLHLYDIANVK	[K].MSPLVSNLHLYDIANVK.[G]			7.40373e-09	5.15092e-05	2.488	1	1	24	1108808470	1108808470 [118-134]			PREDICTED: malate dehydrogenase, chloroplastic-like [Beta vulgaris subsp. vulgaris]	1108808470	0	1914.02	17	201.7	78.7	25.2	139.3	189.1	41.2	51.4	70.3	113.1	90	2.46217e+07	7.90414e+06	1.81304e+06	1.29176e+07	3.03843e+07	2.22496e+06	6.17114e+06	9.24765e+06	1.74145e+07	2.37229e+07	5.31454e+07	2.07421e+07	6.63472e+06	3.67033e+07	4.98194e+07		1.08474e+07
FALSE		High	Unambiguous	MSPAEGSRDENVYLAK	[-].MSPAEGSRDENVYLAK.[L]	1xMet-loss [N-Term]	1xMet-loss [N-Term]	1.45562e-05	5.15092e-05	1.487	1	1	16	731367897	731367897 [1-16]	731367897 1xMet-loss [N-Term]	731367897 1xMet-loss [N-Term]	PREDICTED: 14-3-3-like protein [Beta vulgaris subsp. vulgaris]	731367897	1	1635.8	16	22.6	2.7	42.5	36.9		236.2	146	203.3	163.3	146.6	1.70145e+06	165657	1.8829e+06	2.10487e+06		7.85707e+06	1.07778e+07	1.64668e+07	1.54724e+07	2.377e+07	3.67254e+06	434720	6.89035e+06	5.98069e+06			3.83058e+07
FALSE		High	Unambiguous	MSNYDTDVFMPLFDAIQQAAGSRPYSGK	[K].MSNYDTDVFMPLFDAIQQAAGSRPYSGK.[V]			1.05643e-09	5.15092e-05	2.745	1	1	5	731345168	731345168 [312-339]			PREDICTED: alanine--tRNA ligase [Beta vulgaris subsp. vulgaris]	731345168	0	3109.44	28	291.3	135.4	88	102.4		110.8	60.4	81.5	77	53.1	5.68994e+06	2.17606e+06	1.01433e+06	1.52009e+06		958428	1.16031e+06	1.71592e+06	1.89797e+06	2.23775e+06	1.22816e+07	5.71046e+06	3.71188e+06	4.3191e+06			4.67265e+06
FALSE		High	Unambiguous	MSNPYSPEITETDAKER	[-].MSNPYSPEITETDAKER.[G]	1xMet-loss+Acetyl [N-Term]	1xMet-loss+Acetyl [N-Term]	2.22487e-05	5.15092e-05	1.431	1	1	3	731357574	731357574 [1-17]	731357574 1xMet-loss+Acetyl [N-Term]	731357574 1xMet-loss+Acetyl [N-Term]	PREDICTED: dehydrin COR410 [Beta vulgaris subsp. vulgaris]	731357574	1	1878.87	17					44.3		142.8	418	188.1	206.8					92140.6		221944	712307	375182	705890					151078
FALSE		High	Unambiguous	MSQGTLEVLLVSAKGLENSDFLSSMDPYVILTCR	[-].MSQGTLEVLLVSAKGLENSDFLSSMDPYVILTCR.[T]	1xCarbamidomethyl [C33]; 1xMet-loss+Acetyl [N-Term]	1xCarbamidomethyl [C33]; 1xMet-loss+Acetyl [N-Term]	1.17739e-05	5.15092e-05	1.515	1	1	1	731311927	731311927 [1-34]	731311927 1xMet-loss+Acetyl [N-Term]	731311927 1xMet-loss+Acetyl [N-Term]	PREDICTED: elicitor-responsive protein 3 [Beta vulgaris subsp. vulgaris]	731311927	1	3684.85	34								1000										672629
FALSE		High	Unambiguous	QVHPDIGVSSKAMSIMNSFINDIFEKLAQESAR	[K].QVHPDIGVSSKAMSIMNSFINDIFEKLAQESAR.[L]	1xGG [K/S]	1xGG [S9; S10; K11; S14; S18]	0.00759401	0.000145442	0.66	1	3	5	731349098	731349098 [208-240]			PREDICTED: histone H2B isoform X2 [Beta vulgaris subsp. vulgaris]	731349098; 731345589; 731328282	2	3776.87	33
FALSE		High	Unambiguous	MSQVFEGYER	[-].MSQVFEGYER.[Q]	1xMet-loss+Acetyl [N-Term]	1xMet-loss+Acetyl [N-Term]	0.00131886	5.15092e-05	0.892	1	1	5	731334924	731334924 [1-10]	731334924 1xMet-loss+Acetyl [N-Term]	731334924 1xMet-loss+Acetyl [N-Term]	PREDICTED: vesicle transport v-SNARE 13 [Beta vulgaris subsp. vulgaris]	731334924	0	1156.53	10	60		187.2	164.4	6	69.4	178.4	175.1	159.5		321828		591971	669655	42336.9	164672	939751	1.01192e+06	1.07878e+06		694657		2.16628e+06	1.90273e+06	69417.3		802832
FALSE		High	Unambiguous	MSQVFEGYERQYCEISANLTR	[-].MSQVFEGYERQYCEISANLTR.[K]	1xCarbamidomethyl [C13]; 1xMet-loss+Acetyl [N-Term]	1xCarbamidomethyl [C13]; 1xMet-loss+Acetyl [N-Term]	0.00191046	5.15092e-05	0.843	1	1	1	731334924	731334924 [1-21]	731334924 1xMet-loss+Acetyl [N-Term]	731334924 1xMet-loss+Acetyl [N-Term]	PREDICTED: vesicle transport v-SNARE 13 [Beta vulgaris subsp. vulgaris]	731334924	1	2492.15	21						811.6		29.6		158.8						789898		70185.6		753659							3.85101e+06
FALSE		High	Unambiguous	MSTAGSEKGSANTKTPADFLK	[-].MSTAGSEKGSANTKTPADFLK.[S]	1xMet-loss+Acetyl [N-Term]	1xMet-loss+Acetyl [N-Term]	0.000141284	5.15092e-05	1.187	1	1	2	731323514	731323514 [1-21]	731323514 1xMet-loss+Acetyl [N-Term]	731323514 1xMet-loss+Acetyl [N-Term]	PREDICTED: sm-like protein LSM36B [Beta vulgaris subsp. vulgaris]	731323514	2	2052.02	21	27.6		71.8	137.1		40.7	126.4	247.8	144.1	204.5	199605		305774	752150		129957	896872	1.92805e+06	1.3122e+06	3.18706e+06	430842		1.11896e+06	2.13712e+06			633586
FALSE		High	Unambiguous	MSSTTAAVRPLVSIQTVDSDMSTDTTPTAPLPDVMK	[-].MSSTTAAVRPLVSIQTVDSDMSTDTTPTAPLPDVMK.[A]	1xMet-loss+Acetyl [N-Term]	1xMet-loss+Acetyl [N-Term]	3.0336e-06	5.15092e-05	1.694	1	1	2	731374752	731374752 [1-36]	731374752 1xMet-loss+Acetyl [N-Term]	731374752 1xMet-loss+Acetyl [N-Term]	PREDICTED: 60S ribosomal protein L4 [Beta vulgaris subsp. vulgaris]	731374752	0	3674.81	36								1000										1.01615e+06
FALSE		High	Unambiguous	MSSTEKEVKVEFPGLIR	[-].MSSTEKEVKVEFPGLIR.[V]	1xMet-loss+Acetyl [N-Term]	1xMet-loss+Acetyl [N-Term]	1.19537e-05	5.15092e-05	1.513	1	1	3	731354657	731354657 [1-17]	731354657 1xMet-loss+Acetyl [N-Term]	731354657 1xMet-loss+Acetyl [N-Term]	PREDICTED: 2-hydroxyisoflavanone dehydratase [Beta vulgaris subsp. vulgaris]	731354657	2	1861.01	17							149.1	434.4	244.1	172.3							578466	1.848e+06	1.21524e+06	1.46776e+06
FALSE		High	Unambiguous	MSSSEDSSLWR	[-].MSSSEDSSLWR.[A]	1xMet-loss+Acetyl [N-Term]	1xMet-loss+Acetyl [N-Term]	4.01737e-05	5.15092e-05	1.353	1	1	7	731325541	731325541 [1-11]	731325541 1xMet-loss+Acetyl [N-Term]	731325541 1xMet-loss+Acetyl [N-Term]	PREDICTED: uncharacterized protein LOC104889927 [Beta vulgaris subsp. vulgaris]	731325541	0	1195.52	11	69.8	9	257.7	200.9	58.6	32.2	117.5	156.2	94.4	3.7	1.16533e+06	123191	2.53684e+06	2.54639e+06	1.28733e+06	238070	1.92762e+06	2.80901e+06	1.98596e+06	132746	2.51534e+06	323280	9.28342e+06	7.2352e+06	2.11076e+06		1.16067e+06
FALSE		High	Unambiguous	MSSSDQPPLPTSNTDEEPAELSKK	[-].MSSSDQPPLPTSNTDEEPAELSKK.[A]	1xMet-loss+Acetyl [N-Term]	1xMet-loss+Acetyl [N-Term]	1.15969e-05	5.15092e-05	1.517	1	1	2	731323589	731323589 [1-24]	731323589 1xMet-loss+Acetyl [N-Term]	731323589 1xMet-loss+Acetyl [N-Term]	PREDICTED: aspartate--tRNA ligase 2, cytoplasmic [Beta vulgaris subsp. vulgaris]	731323589	1	2499.17	24	3.7					87.4	241.6	256	182.8	228.6	27223.2					286668	1.75942e+06	2.04454e+06	1.70813e+06	3655622	58760.6						1.3976e+06
FALSE		High	Unambiguous	MSSSAAVPFWR	[-].MSSSAAVPFWR.[A]	1xMet-loss+Acetyl [N-Term]	1xMet-loss+Acetyl [N-Term]	0.00155765	5.15092e-05	0.87	1	1	5	731332454	731332454 [1-11]	731332454 1xMet-loss+Acetyl [N-Term]	731332454 1xMet-loss+Acetyl [N-Term]	PREDICTED: ATP synthase subunit epsilon, mitochondrial [Beta vulgaris subsp. vulgaris]	731332454	0	1149.57	11	67.6	15	112.8	117.2		68.2	103.7	218.3	164.6	132.6	681146	124046	670348	897141		304170	1.02703e+06	2.37084e+06	2.0919e+06	2.88364e+06	1.47024e+06	325524	2.4531e+06	2.54909e+06			1.48293e+06
FALSE		High	Unambiguous	MSSRKETVLDLAK	[-].MSSRKETVLDLAK.[F]	1xMet-loss+Acetyl [N-Term]	1xMet-loss+Acetyl [N-Term]	0.000268978	5.15092e-05	1.102	2	2	3	731332670; 731344499	731332670 [1-13]; 731344499 [1-13]	731332670 1xMet-loss+Acetyl [N-Term]; 731344499 1xMet-loss+Acetyl [N-Term]	731332670 1xMet-loss+Acetyl [N-Term]; 731344499 1xMet-loss+Acetyl [N-Term]	PREDICTED: sm-like protein LSM7 [Beta vulgaris subsp. vulgaris] PREDICTED: sm-like protein LSM7 [Beta vulgaris subsp. vulgaris]	731332670; 731344499	2	1388.77	13				50.5		48.9	231.5	280	153.9	235.1				238505		134593	1.41449e+06	1.87629e+06	1.20676e+06	3.15515e+06				677678			656185
FALSE		High	Unambiguous	MSSQSANTSLLTPYQMGK	[-].MSSQSANTSLLTPYQMGK.[F]	1xMet-loss+Acetyl [N-Term]	1xMet-loss+Acetyl [N-Term]	2.83032e-08	5.15092e-05	2.311	1	1	3	731313931	731313931 [1-18]	731313931 1xMet-loss+Acetyl [N-Term]	731313931 1xMet-loss+Acetyl [N-Term]	PREDICTED: 12-oxophytodienoate reductase 2 [Beta vulgaris subsp. vulgaris]	731313931	0	1854.89	18	29.5		28	69.7			227.4	231.9	128.2	285.2	174277		97680.4	312595			1319328	1.47585e+06	954948	3.63395e+06	376173		357456	888191
FALSE		High	Unambiguous	MSSPQQNQNPTNPETQTQSYPEMPPIR	[-].MSSPQQNQNPTNPETQTQSYPEMPPIR.[V]	1xMet-loss+Acetyl [N-Term]	1xMet-loss+Acetyl [N-Term]	1.19468e-06	5.15092e-05	1.817	1	1	10	731365319	731365319 [1-27]	731365319 1xMet-loss+Acetyl [N-Term]	731365319 1xMet-loss+Acetyl [N-Term]	PREDICTED: universal stress protein PHOS32 [Beta vulgaris subsp. vulgaris]	731365319	0	3011.38	27	17.4		59.9	93.7	33.4	43.4	134.9	293.2	136.2	188	477519		969187	1.95386e+06	1.2057e+06	526864	3.63947e+06	8.67431e+06	4.71598e+06	1.11396e+07	1.03071e+06		3.54668e+06	5.55161e+06	1.97692e+06		2.56863e+06
FALSE		High	Unambiguous	MSSNNPSQLLPSELIDR	[-].MSSNNPSQLLPSELIDR.[C]	1xMet-loss+Acetyl [N-Term]	1xMet-loss+Acetyl [N-Term]	5.39222e-07	5.15092e-05	1.922	1	1	3	731361973	731361973 [1-17]	731361973 1xMet-loss+Acetyl [N-Term]	731361973 1xMet-loss+Acetyl [N-Term]	PREDICTED: LOW QUALITY PROTEIN: sm-like protein LSM5 [Beta vulgaris subsp. vulgaris]	731361973	0	1811.91	17	13.1		57.7	72.5			188	249.1	196.8	222.8	92429.1		240016	388679			1303175	1.89403e+06	1.75067e+06	3.39286e+06	199506		878324	1.10437e+06
FALSE		High	Unambiguous	MSSIGTGYDLSVTTFSPDGR	[-].MSSIGTGYDLSVTTFSPDGR.[V]	1xMet-loss+Acetyl [N-Term]	1xMet-loss+Acetyl [N-Term]	3.24195e-09	5.15092e-05	2.597	1	2	10	731356420	731356420 [1-20]	731356420 1xMet-loss+Acetyl [N-Term]	731356420 1xMet-loss+Acetyl [N-Term]	PREDICTED: proteasome subunit alpha type-3 [Beta vulgaris subsp. vulgaris]	731356420; 731378786	0	2001.94	20	43.8		65.2	92.6	6.9	25.7	204.8	176	146.2	238.9	497179		437047	799375	102828	129305	2.28625e+06	2.15571e+06	2.09483e+06	5.85896e+06	1.07315e+06		1.59935e+06	2.2713e+06	168602		630404
FALSE		High	Unambiguous	MSSGDVNPVKIDKYR	[-].MSSGDVNPVKIDKYR.[S]	1xMet-loss+Acetyl [N-Term]	1xMet-loss+Acetyl [N-Term]	4.32861e-07	5.15092e-05	1.951	1	1	4	731328974	731328974 [1-15]	731328974 1xMet-loss+Acetyl [N-Term]	731328974 1xMet-loss+Acetyl [N-Term]	PREDICTED: pathogen-related protein [Beta vulgaris subsp. vulgaris]	731328974	2	1619.84	15						272.7	156	248.4	108.3	214.6						1.45018e+06	1.84098e+06	3.21503e+06	1.64085e+06	5.56315e+06							7.07011e+06
FALSE		High	Unambiguous	MSSFDTFSNDGDELRTSDRPFDDGYVGYDPNLPSQR	[-].MSSFDTFSNDGDELRTSDRPFDDGYVGYDPNLPSQR.[F]	1xPhospho [D/E/R/S/T]; 1xMet-loss+Acetyl [N-Term]	1xPhospho [S2; S3; D5; T6; S8; D10; E13; R15; T16; S17; D18; R19; D22]; 1xMet-loss+Acetyl [N-Term]	0.000197171	5.15092e-05	1.143	1	1	5	731350516	731350516 [1-36]	731350516 1xPhospho [T6; S8; D10; R19; D22]; 1xMet-loss+Acetyl [N-Term]	731350516 1xPhospho [D/S/R/T]; 1xMet-loss+Acetyl [N-Term]	PREDICTED: clathrin light chain 2 [Beta vulgaris subsp. vulgaris]	731350516	1	4091.72	36						49.3	209.7	410.7	75.4	254.9						230758	2.18005e+06	4681817	1.00545e+06	5.81989e+06							1.12502e+06
FALSE		High	Unambiguous	MSSFDTFSNDGDELRTSDRPFDDGYVGYDPNLPSQR	[-].MSSFDTFSNDGDELRTSDRPFDDGYVGYDPNLPSQR.[F]	1xMet-loss+Acetyl [N-Term]	1xMet-loss+Acetyl [N-Term]	3.63426e-08	5.15092e-05	2.278	1	1	7	731350516	731350516 [1-36]	731350516 1xMet-loss+Acetyl [N-Term]	731350516 1xMet-loss+Acetyl [N-Term]	PREDICTED: clathrin light chain 2 [Beta vulgaris subsp. vulgaris]	731350516	1	4011.75	36						15.5	222.3	258	229.4	274.8						200728	6381252	8.12336e+06	8.45204e+06	1.73259e+07							978617
FALSE		High	Unambiguous	MSSFDTFSNDGDELR	[-].MSSFDTFSNDGDELR.[T]	1xMet-loss+Acetyl [N-Term]	1xMet-loss+Acetyl [N-Term]	1.45478e-06	5.15092e-05	1.791	1	1	5	731350516	731350516 [1-15]	731350516 1xMet-loss+Acetyl [N-Term]	731350516 1xMet-loss+Acetyl [N-Term]	PREDICTED: clathrin light chain 2 [Beta vulgaris subsp. vulgaris]	731350516	0	1631.68	15			162.8	273.7			111.3	265.4	186.7				925834	2.004e+06			1.05454e+06	2.75743e+06	2.26996e+06				3.38803e+06	5.69408e+06
FALSE		High	Unambiguous	MSSFDQNVLVMR	[-].MSSFDQNVLVMR.[H]	1xMet-loss+Acetyl [N-Term]	1xMet-loss+Acetyl [N-Term]	2.58739e-06	5.15092e-05	1.715	1	1	7	731360956	731360956 [1-12]	731360956 1xMet-loss+Acetyl [N-Term]	731360956 1xMet-loss+Acetyl [N-Term]	PREDICTED: uncharacterized protein LOC104905306 isoform X1 [Beta vulgaris subsp. vulgaris]	731360956	0	1337.65	12	47.2	5.5	28.5	89.9	10.5	57.1	188.3	259.7	133.6	179.6	1.19627e+06	114959	426016	1.72956e+06	349767	640571	4.68738e+06	7.08885e+06	4.26788e+06	9815744	2.58211e+06	301677	1.55898e+06	4.91429e+06	573494		3.123e+06
FALSE		High	Unambiguous	MSQVVLISECFVRPK	[-].MSQVVLISECFVRPK.[S]	1xCarbamidomethyl [C10]; 1xMet-loss+Acetyl [N-Term]	1xCarbamidomethyl [C10]; 1xMet-loss+Acetyl [N-Term]	5.95381e-06	5.15092e-05	1.605	2	3	1	731365632; 731373164	731365632 [1-15]; 731373164 [1-15]	731365632 1xMet-loss+Acetyl [N-Term]; 731373164 1xMet-loss+Acetyl [N-Term]	731365632 1xMet-loss+Acetyl [N-Term]; 731373164 1xMet-loss+Acetyl [N-Term]	PREDICTED: uncharacterized acetyltransferase At3g50280 [Beta vulgaris subsp. vulgaris] PREDICTED: uncharacterized acetyltransferase At3g50280 [Beta vulgaris subsp. vulgaris]	731365632; 731373164; 731373149	0	1703.91	15
FALSE		High	Unambiguous	MSNPRVFFDMEVGNQPAGR	[-].MSNPRVFFDMEVGNQPAGR.[I]	1xMet-loss+Acetyl [N-Term]	1xMet-loss+Acetyl [N-Term]	3.19882e-06	5.15092e-05	1.687	1	1	10	731357859	731357859 [1-19]	731357859 1xMet-loss+Acetyl [N-Term]	731357859 1xMet-loss+Acetyl [N-Term]	PREDICTED: peptidyl-prolyl cis-trans isomerase [Beta vulgaris subsp. vulgaris]	731357859	1	2062.98	19			0.7	4.3	2.4	47.9	147.2	483.6	65.6	248.4			18405.4	153899	144961	992323	6.77079e+06	24391648	3.87377e+06	25092797			67353.4	437282	237684		4.8379e+06
FALSE		High	Unambiguous	MTDAEELTVEERNLLSVAYKNVIGAR	[K].MTDAEELTVEERNLLSVAYKNVIGAR.[R]			3.3987e-06	5.15092e-05	1.679	1	1	2	731315739	731315739 [36-61]			PREDICTED: 14-3-3-like protein [Beta vulgaris subsp. vulgaris]	731315739	2	2921.5	26							337.9	369.9	292.2								929541	1.11616e+06	1.03155e+06
FALSE		High	Unambiguous	MSDEEHQFESKADSGASK	[-].MSDEEHQFESKADSGASK.[T]	1xPhospho [D/S]; 1xMet-loss+Acetyl [N-Term]	1xPhospho [S2; D3]; 1xMet-loss+Acetyl [N-Term]	2.12478e-06	5.15092e-05	1.741	1	1	9	731343825	731343825 [1-18]	731343825 1xPhospho [S2; D3]; 1xMet-loss+Acetyl [N-Term]	731343825 1xPhospho [S/D]; 1xMet-loss+Acetyl [N-Term]	PREDICTED: eukaryotic translation initiation factor 5A [Beta vulgaris subsp. vulgaris]	731343825	1	1973.78	18				3		32.2	160.9	324.2	196.1	283.6				53409.7		330008	3656982	8080617	5.71949e+06	1.41573e+07				151756			1.6089e+06
FALSE		High	Unambiguous	MSDEEHQFESKADAGASKTFPQQAGTIR	[-].MSDEEHQFESKADAGASKTFPQQAGTIR.[K]	1xPhospho [D/S]; 1xMet-loss+Acetyl [N-Term]	1xPhospho [S2; D3]; 1xMet-loss+Acetyl [N-Term]	2.62227e-09	5.15092e-05	2.625	2	2	10	731343821; 731343827	731343821 [1-28]; 731343827 [1-28]	731343821 1xPhospho [S2; D3]; 1xMet-loss+Acetyl [N-Term]; 731343827 1xPhospho [S2; D3]; 1xMet-loss+Acetyl [N-Term]	731343821 1xPhospho [D/S]; 1xMet-loss+Acetyl [N-Term]; 731343827 1xPhospho [D/S]; 1xMet-loss+Acetyl [N-Term]	PREDICTED: eukaryotic translation initiation factor 5A [Beta vulgaris subsp. vulgaris] PREDICTED: eukaryotic translation initiation factor 5A [Beta vulgaris subsp. vulgaris]	731343821; 731343827	2	3057.36	28						74.6	191.2	509.5	57.5	167.1						819873	4.66044e+06	1.36235e+07	1.80061e+06	8947726							3.99715e+06
FALSE		High	Unambiguous	MNLSDEVDLEDYVSRPDKISAAEISAICQEAGMHAVR	[K].MNLSDEVDLEDYVSRPDKISAAEISAICQEAGMHAVR.[K]	1xCarbamidomethyl [C28]	1xCarbamidomethyl [C28]	0.000327521	5.15092e-05	1.076	1	1	2	731346572	731346572 [355-391]			PREDICTED: 26S protease regulatory subunit 6B homolog [Beta vulgaris subsp. vulgaris]	731346572	1	4119.94	37						258.9	118	94.6	244.2	284.3						205163	207620	182555	551410	1.09851e+06							1.00024e+06
FALSE		High	Unambiguous	MNLSDEVDLEDYVSRPDK	[K].MNLSDEVDLEDYVSRPDK.[I]			4.35897e-08	5.15092e-05	2.254	1	1	4	731346572	731346572 [355-372]			PREDICTED: 26S protease regulatory subunit 6B homolog [Beta vulgaris subsp. vulgaris]	731346572	0	2124.98	18	217.9	214	1.8	112.8	165	93.2	42.2	82.1	71.1		2.94191e+06	2.37627e+06	14194.1	1.1566e+06	2.93294e+06	557317	559711	1.194e+06	1.2114e+06		6.35005e+06	6.23585e+06	51942.5	3.2863e+06	4.80898e+06		2.71711e+06
FALSE		High	Unambiguous	MNHIAGAEEQIVTER	[-].MNHIAGAEEQIVTER.[L]	1xAcetyl [N-Term]	1xAcetyl [N-Term]	6.52047e-06	5.15092e-05	1.593	1	1	6	731323456	731323456 [1-15]	731323456 1xAcetyl [N-Term]	731323456 1xAcetyl [N-Term]	PREDICTED: protein FAM136A [Beta vulgaris subsp. vulgaris]	731323456	0	1739.84	15				81	6.2	102.4	116.5	234.1	153.9	305.9				677880	90447.8	499679	1.26155e+06	2.77968e+06	2.13941e+06	7.27515e+06				1.9261e+06	148302		2.4361e+06
FALSE		High	Unambiguous	MNFEDLQEFGLVSLVQVAANLLNDRLPEAR	[R].MNFEDLQEFGLVSLVQVAANLLNDRLPEAR.[E]			9.43497e-09	5.15092e-05	2.456	1	1	6	731373197	731373197 [194-223]			PREDICTED: crescerin-2 [Beta vulgaris subsp. vulgaris]	731373197	1	3401.75	30		150.9	101	69		81.5	142.4	140.7	145.4	169.4		1.77242e+06	850914	748284		515060	1.99806e+06	2.16506e+06	2.61839e+06	5.22115e+06		4.65121e+06	3.11387e+06	2.12614e+06			2.51109e+06
FALSE		High	Unambiguous	MNFAEIEKGINTLAKK	[K].MNFAEIEKGINTLAKK.[A]			0.000234696	5.15092e-05	1.12	1	1	2	731376512	731376512 [362-377]			PREDICTED: dihydrolipoyllysine-residue succinyltransferase component of 2-oxoglutarate dehydrogenase complex 1, mitochondrial [Beta vulgaris subsp. vulgaris]	731376512	2	1806.98	16				60.3		59.6	21.1	326.9	140.1	392				98716.3		56846.1	44614.4	758968	380717	1.82301e+06				280488			277143
FALSE		High	Unambiguous	MNFAEIEKGINTLAK	[K].MNFAEIEKGINTLAK.[K]	1xOxidation [M1]	1xOxidation [M1]	1.61757e-06	5.15092e-05	1.777	1	1	1	731376512	731376512 [362-376]			PREDICTED: dihydrolipoyllysine-residue succinyltransferase component of 2-oxoglutarate dehydrogenase complex 1, mitochondrial [Beta vulgaris subsp. vulgaris]	731376512	1	1694.88	15				61.3		906.1				32.6				165181		1.42353e+06				249689				469339			6.9402e+06
FALSE		High	Unambiguous	MNFAEIEKGINTLAK	[K].MNFAEIEKGINTLAK.[K]			4.56169e-08	5.15092e-05	2.248	1	1	12	731376512	731376512 [362-376]			PREDICTED: dihydrolipoyllysine-residue succinyltransferase component of 2-oxoglutarate dehydrogenase complex 1, mitochondrial [Beta vulgaris subsp. vulgaris]	731376512	1	1678.88	15	5.6	47.4	26.4	48.7	1	30.2	160.7	167.5	281.5	231	318762	2.23635e+06	893295	2.11931e+06	78995.1	767218	9.0533e+06	1.03532e+07	2.03615e+07	2.85868e+07	688041	5.86867e+06	3.26896e+06	6.02171e+06	129524		3.74044e+06
FALSE		High	Unambiguous	MNISSSSFSIWPPTQR	[K].MNISSSSFSIWPPTQR.[T]			1.17602e-07	5.15092e-05	2.123	1	1	7	731314788	731314788 [37-52]			PREDICTED: MFP1 attachment factor 1 [Beta vulgaris subsp. vulgaris]	731314788	0	1837.89	16		0.8	3.8	4.8	2.6	31.9	144.9	512.9	125.4	172.9		16856.8	55284.9	88239.5	84235	344809	3.48166e+06	1.35116e+07	3.86454e+06	9122491		44235.8	202312	250719	138115		1.68106e+06
FALSE		High	Unambiguous	MNFAEIEK	[K].MNFAEIEK.[G]			0.00198406	5.15092e-05	0.838	1	1	12	731376512	731376512 [362-369]			PREDICTED: dihydrolipoyllysine-residue succinyltransferase component of 2-oxoglutarate dehydrogenase complex 1, mitochondrial [Beta vulgaris subsp. vulgaris]	731376512	0	981.471	8	51.4	333.1	59.7	111.6	1.8	98	56.9	95.3	130.7	61.4	3.6736e+06	1.95647e+07	2.51411e+06	6.0516e+06	171638	3.09942e+06	3.99497e+06	7.33351e+06	1.17721e+07	9.45547e+06	7.92939e+06	5.13418e+07	9.20022e+06	1.71947e+07	281425		1.51107e+07
FALSE		High	Unambiguous	VETGVLKPGMLVTFGPTGLTTEVK	[R].VETGVLKPGMLVTFGPTGLTTEVK.[S]	1xGG [T13]	1xGG [T13]	0.00812501	0.000145442	0.651	1	2	1	731318329	731318329 [255-278]			PREDICTED: elongation factor 1-alpha-like [Beta vulgaris subsp. vulgaris]	731318329; 731318331	0	2588.4	24
FALSE		High	Unambiguous	MNDTDVQKQIQQMVR	[-].MNDTDVQKQIQQMVR.[F]	1xAcetyl [N-Term]	1xAcetyl [N-Term]	5.63637e-09	5.15092e-05	2.524	1	1	18	731330860	731330860 [1-15]	731330860 1xAcetyl [N-Term]	731330860 1xAcetyl [N-Term]	PREDICTED: V-type proton ATPase subunit E [Beta vulgaris subsp. vulgaris]	731330860	1	1875.91	15			2.4	4.2		20	306.5	347.2	165.4	154.2			82911.7	185419		509841	1.73602e+07	2.15665e+07	1.20275e+07	1.9191e+07			303410	526841			2.48564e+06
FALSE		High	Unambiguous	MNDIAPNLTSLIGEMVGAR	[K].MNDIAPNLTSLIGEMVGAR.[L]			0.0014662	5.15092e-05	0.878	1	1	1	731333770	731333770 [289-307]			PREDICTED: nucleolar protein 56 [Beta vulgaris subsp. vulgaris]	731333770	0	2002.01	19	206.6			525.3		126.5	57.8		59.3	24.5	325620			629057		88271.1	89560.5		117855	83292.4	702844			1.78737e+06			430351
FALSE		High	Unambiguous	MNDFQGLLSSDYGFKPQGK	[-].MNDFQGLLSSDYGFKPQGK.[A]	1xAcetyl [N-Term]	1xAcetyl [N-Term]	1.50918e-08	5.15092e-05	2.394	1	1	4	731327209	731327209 [1-19]	731327209 1xAcetyl [N-Term]	731327209 1xAcetyl [N-Term]	PREDICTED: auxilin-related protein 2 [Beta vulgaris subsp. vulgaris]	731327209	0	2174.02	19				41.4		131.3		380.3	130.6	316.3				119639		221003		1.55803e+06	625956	2.59529e+06				339936			1.07746e+06
FALSE		High	Unambiguous	MNCSISGEVPEEPVVSKK	[-].MNCSISGEVPEEPVVSKK.[S]	1xAcetyl [N-Term]; 1xCarbamidomethyl [C3]	1xAcetyl [N-Term]; 1xCarbamidomethyl [C3]	1.17671e-06	5.15092e-05	1.819	1	1	4	731320676	731320676 [1-18]	731320676 1xAcetyl [N-Term]	731320676 1xAcetyl [N-Term]	PREDICTED: pre-mRNA-processing factor 19 [Beta vulgaris subsp. vulgaris]	731320676	1	2031.97	18				141.5	32.6	55.1	121.1	402.2	59.8	187.7				716388	286174	162636	793337	2888857	502273	2700888				2.03551e+06	469223		792902
FALSE		High	Unambiguous	MNALAATNRNFKR	[-].MNALAATNRNFKR.[A]	1xAcetyl [N-Term]	1xAcetyl [N-Term]	0.000184178	5.15092e-05	1.152	1	1	8	731322716	731322716 [1-13]	731322716 1xAcetyl [N-Term]	731322716 1xAcetyl [N-Term]	PREDICTED: glutamate dehydrogenase B [Beta vulgaris subsp. vulgaris]	731322716	2	1548.81	13						50.9	240.7	482.1	41.7	184.6						683482	7.17137e+06	1.57538e+07	1.59332e+06	1.2081e+07							3.3322e+06
FALSE		High	Unambiguous	MNALAATNRNFK	[-].MNALAATNRNFK.[R]	1xAcetyl [N-Term]	1xAcetyl [N-Term]	4.92921e-05	5.15092e-05	1.326	1	1	2	731322716	731322716 [1-12]	731322716 1xAcetyl [N-Term]	731322716 1xAcetyl [N-Term]	PREDICTED: glutamate dehydrogenase B [Beta vulgaris subsp. vulgaris]	731322716	1	1392.71	12	19.8		21	36.4	48.9	69.4	222.1	273.4	75.9	233.2	129080		80747.3	180218	419783	200360	1.42332e+06	1.92142e+06	624458	3.28284e+06	278615		295490	512062	688294		976820
FALSE		High	Unambiguous	MNEAQVCVSTTNR	[R].MNEAQVCVSTTNR.[N]	1xCarbamidomethyl [C7]	1xCarbamidomethyl [C7]	1.82496e-07	5.15092e-05	2.065	1	1	3	731374883	731374883 [463-475]			PREDICTED: 3-isopropylmalate dehydratase large subunit, chloroplastic [Beta vulgaris subsp. vulgaris]	731374883	0	1509.68	13		2				92.4	174.3	317.9	151.1	262.4		37365.7				916387	3.83759e+06	7.67744e+06	4269969	1.26946e+07		98055.5					4.46769e+06
FALSE		High	Unambiguous	MNALAATNR	[-].MNALAATNR.[N]	1xAcetyl [N-Term]	1xAcetyl [N-Term]	7.08715e-06	5.15092e-05	1.582	1	1	17	731322716	731322716 [1-9]	731322716 1xAcetyl [N-Term]	731322716 1xAcetyl [N-Term]	PREDICTED: glutamate dehydrogenase B [Beta vulgaris subsp. vulgaris]	731322716	0	1003.5	9	48.3	30.7	118.9	80	44.7	43.5	139.1	150.1	151.1	193.8	2.68433e+06	1.40611e+06	3.89986e+06	3.3805e+06	3.26998e+06	1.07104e+06	7.60368e+06	8.99997e+06	1.05991e+07	2.32669e+07	5.79405e+06	3.68993e+06	1.42713e+07	9.60518e+06	5.3616e+06		5.22166e+06
FALSE		High	Unambiguous	MNLTLSADHR	[K].MNLTLSADHR.[V]			0.000128034	5.15092e-05	1.2	1	1	10	731319146	731319146 [866-875]			PREDICTED: dihydrolipoyllysine-residue acetyltransferase component 1 of pyruvate dehydrogenase complex, mitochondrial [Beta vulgaris subsp. vulgaris]	731319146	0	1157.57	10	2.1	2.8	2.7	31.9	3.7	229.9	198.2	176.8	206.8	145.1	43019	48496.8	33397.4	504833	100423	2.11929e+06	4.05497e+06	3.96632e+06	5.43079e+06	6.51892e+06	92855.5	127266	122216	1.43441e+06	164658		1.03322e+07
FALSE		High	Unambiguous	MNLVISDIRGEQEMHSR	[R].MNLVISDIRGEQEMHSR.[E]			0.000310609	5.15092e-05	1.083	1	2	2	731349615	731349615 [82-98]			PREDICTED: protein FLX-like 3 isoform X2 [Beta vulgaris subsp. vulgaris]	731349613; 731349615	1	2014.98	17					36.8	67.9	147.6	207.4	10	530.3					167780	104101	502371	773995	43783.4	3.9637e+06					275098		507525
FALSE		High	Unambiguous	MNVEEEVGKLQEEIKR	[-].MNVEEEVGKLQEEIKR.[L]	1xAcetyl [N-Term]	1xAcetyl [N-Term]	1.15697e-09	5.15092e-05	2.733	1	1	17	731359634	731359634 [1-16]	731359634 1xAcetyl [N-Term]	731359634 1xAcetyl [N-Term]	PREDICTED: costars family protein [Beta vulgaris subsp. vulgaris]	731359634	2	1973	16	96.3	25.7	90.5	75.3	213.9	62.1	97.2	108.2	133.6	97.3	9.95446e+06	2183562	5.51685e+06	5918538	29116662	2.84376e+06	9.87627e+06	1.20581e+07	1.74178e+07	2.17073e+07	2.14865e+07	5.73013e+06	2.01886e+07	1.68166e+07	4.77409e+07		1.38643e+07
FALSE		High	Unambiguous	MNTIAPNLTALVGELVGAR	[R].MNTIAPNLTALVGELVGAR.[L]	1xOxidation [M1]	1xOxidation [M1]	0.000142359	5.15092e-05	1.186	2	2	1	731328228; 731352088	731328228 [277-295]; 731352088 [277-295]			PREDICTED: probable nucleolar protein 5-2 [Beta vulgaris subsp. vulgaris] PREDICTED: probable nucleolar protein 5-2 [Beta vulgaris subsp. vulgaris]	731328228; 731352088	0	1956.06	19		191.7	365.7	303.7	85.5		53.4					778167	1064727	1.13903e+06	555664		259049					2.04208e+06	3.8963e+06	3.23638e+06	911090
FALSE		High	Unambiguous	MNTIAPNLTALVGELVGAR	[R].MNTIAPNLTALVGELVGAR.[L]			9.50672e-09	5.15092e-05	2.455	2	2	14	731328228; 731352088	731328228 [277-295]; 731352088 [277-295]			PREDICTED: probable nucleolar protein 5-2 [Beta vulgaris subsp. vulgaris] PREDICTED: probable nucleolar protein 5-2 [Beta vulgaris subsp. vulgaris]	731328228; 731352088	0	1940.06	19	330.4	104.4		42.5	174.7	80.9	131	34.7	66.2	35.2	2.69974e+07	7.01789e+06		2.6403e+06	1.87859e+07	2.92487e+06	1.05164e+07	3.05738e+06	6.82104e+06	6.19875e+06	5.82733e+07	1.84164e+07		7.50201e+06	3.08022e+07		1.42597e+07
FALSE		High	Unambiguous	MNTKPSHGPIHFR	[R].MNTKPSHGPIHFR.[A]			1.43207e-07	5.15092e-05	2.097	1	1	10	731347477	731347477 [67-79]			PREDICTED: 60S ribosomal protein L13a-2 [Beta vulgaris subsp. vulgaris]	731347477	0	1521.77	13	290.7	48.5	8.5	87	168.4	30.3	122.1	44.6	144.6	55.5	5.40243e+06	740726	93329.1	1.22772e+06	4.11944e+06	249311	2.23023e+06	892380	3.38999e+06	2.2256e+06	1.1661e+07	1.94382e+06	341532	3.48838e+06	6.75442e+06		1.21547e+06
FALSE		High	Unambiguous	MNTDMLYALR	[R].MNTDMLYALR.[K]			0.000227692	5.15092e-05	1.124	1	1	1	731349433	731349433 [220-229]			PREDICTED: peroxidase 57 [Beta vulgaris subsp. vulgaris]	731349433	0	1227.59	10	121.4			570.4	39.3			188		80.9	104519			373213	44572.4			174542		150361	225602			1.06043e+06	73082.8
FALSE		High	Unambiguous	MNTDITASTKPEYTVVDRNPPFTK	[-].MNTDITASTKPEYTVVDRNPPFTK.[V]	1xAcetyl [N-Term]	1xAcetyl [N-Term]	2.64221e-09	5.15092e-05	2.624	1	1	4	731329987	731329987 [1-24]	731329987 1xAcetyl [N-Term]	731329987 1xAcetyl [N-Term]	PREDICTED: NADH-ubiquinone oxidoreductase 20.9 kDa subunit [Beta vulgaris subsp. vulgaris]	731329987	1	2767.36	24				70		82.2	206.2	252.5	202.8	186.3				252432		172861	961852	1.29206e+06	1214436	1.90938e+06				717248			842755
FALSE		High	Unambiguous	MNRPLEEVASVVASAAVANTSANNLKPVFLTK	[-].MNRPLEEVASVVASAAVANTSANNLKPVFLTK.[A]	1xAcetyl [N-Term]	1xAcetyl [N-Term]	4.81578e-06	5.15092e-05	1.633	1	1	1	731316863	731316863 [1-32]	731316863 1xAcetyl [N-Term]	731316863 1xAcetyl [N-Term]	PREDICTED: DEAD-box ATP-dependent RNA helicase 21 [Beta vulgaris subsp. vulgaris]	731316863	0	3383.8	32						526		431.5	42.5							511216		1.02078e+06	117664								2.49235e+06
FALSE		High	Unambiguous	MNLTPVALMEGTCFAK	[R].MNLTPVALMEGTCFAK.[S]	1xCarbamidomethyl [C13]	1xCarbamidomethyl [C13]	1.96975e-06	5.15092e-05	1.751	1	1	11	731364418	731364418 [342-357]			PREDICTED: glutathione reductase, chloroplastic [Beta vulgaris subsp. vulgaris]	731364418	0	1782.86	16	210.7	245.4	16.2	5.7	79	50.3	117.3	171.6	96.6	7.1	7858607	7.52722e+06	356584	160809	3.87661e+06	830883	4.29791e+06	6.89852e+06	4.54368e+06	574851	1.69626e+07	1.97531e+07	1.3049e+06	456914	6.35625e+06		4.05083e+06
FALSE		High	Unambiguous	MNQDYDYLFK	[-].MNQDYDYLFK.[L]	1xAcetyl [N-Term]	1xAcetyl [N-Term]	0.00186762	5.15092e-05	0.846	1	1	3	731375591	731375591 [1-10]	731375591 1xAcetyl [N-Term]	731375591 1xAcetyl [N-Term]	PREDICTED: GTP-binding protein YPTM2 [Beta vulgaris subsp. vulgaris]	731375591	0	1378.6	10	92.7		190.1	225.9	5.3	72.2	111.6	74.2	89.9	138	1.19001e+06		1.43946e+06	2203116	89768.8	410175	1.40739e+06	1.02696e+06	1.45542e+06	3.82273e+06	2.5686e+06		5.26761e+06	6.25983e+06	147189		1.99974e+06
FALSE		High	Unambiguous	MNPVQFEKDDDTNYHMDMIAGLANMR	[R].MNPVQFEKDDDTNYHMDMIAGLANMR.[A]			4.8524e-06	5.15092e-05	1.632	1	1	2	731331706	731331706 [885-910]			PREDICTED: ubiquitin-activating enzyme E1 1 [Beta vulgaris subsp. vulgaris]	731331706	1	3056.34	26						263.2		33		703.8						275929		84290.2		3.59756e+06							1.34524e+06
FALSE		High	Unambiguous	MNPLVSVLHLYDVVNTLGVTADISHMDTGAVVR	[K].MNPLVSVLHLYDVVNTLGVTADISHMDTGAVVR.[G]			5.50001e-12	5.15092e-05	3.439	1	1	4	731339293	731339293 [67-99]			PREDICTED: malate dehydrogenase, glyoxysomal [Beta vulgaris subsp. vulgaris]	731339293	0	3536.82	33		193.8	182.2	71.4		124.9	37.2		63.8	326.8		1.29783e+06	875066	441447		450332	297570		654778	5.74419e+06		3.40579e+06	3.20225e+06	1.25431e+06			2.19552e+06
FALSE		High	Unambiguous	MNPEYDYLFK	[-].MNPEYDYLFK.[L]	1xAcetyl [N-Term]	1xAcetyl [N-Term]	0.00041419	5.15092e-05	1.045	1	1	3	731360831	731360831 [1-10]	731360831 1xAcetyl [N-Term]	731360831 1xAcetyl [N-Term]	PREDICTED: ras-related protein RABD2a [Beta vulgaris subsp. vulgaris]	731360831	0	1361.61	10		5.3	107.8	101.3	301.3	185.7	65.3	74.2	72.4	86.7		41956	612025	740751	3.81921e+06	791422	617973	770143	879216	1.80146e+06		110101	2.23967e+06	2.10473e+06	6.26214e+06		3.85845e+06
FALSE		High	Unambiguous	MNNVLLLNQEKTPNLLAWAER	[K].MNNVLLLNQEKTPNLLAWAER.[F]			1.12376e-07	5.15092e-05	2.129	1	1	2	731344229	731344229 [175-195]			PREDICTED: glutathione S-transferase U17 [Beta vulgaris subsp. vulgaris]	731344229	1	2467.31	21	681.9		123.3		113.1			81.8			2.16887e+06		231274		473385			280358			4.68146e+06		846335		776183
FALSE		High	Unambiguous	MNNVLLLNQEK	[K].MNNVLLLNQEK.[T]			0.000500517	5.15092e-05	1.02	1	1	15	731344229	731344229 [175-185]			PREDICTED: glutathione S-transferase U17 [Beta vulgaris subsp. vulgaris]	731344229	0	1315.7	11	126.5	56.4	291.3	220.7	2	14.2	28.8	108.7	37.4	114.1	5.48471e+06	2.01068e+06	7.44994e+06	7.26977e+06	111693	271641	1.22714e+06	5.07993e+06	2.04454e+06	1.06775e+07	1.18386e+07	5.27645e+06	2.72626e+07	2.0656e+07	183136		1.32434e+06
FALSE		High	Unambiguous	MNNTVLLSQEKTPNLLAWAER	[K].MNNTVLLSQEKTPNLLAWAER.[F]			2.53069e-05	5.15092e-05	1.414	1	1	2	1108931852	1108931852 [1105-1125]			PREDICTED: pentatricopeptide repeat-containing protein At1g05670, mitochondrial [Beta vulgaris subsp. vulgaris]	1108931852	1	2428.27	21							445.5	277.6	276.9								1.896e+06	1.29561e+06	1.51274e+06
FALSE		High	Unambiguous	MNNTVLLSQEK	[K].MNNTVLLSQEK.[T]			2.06254e-05	5.15092e-05	1.441	1	1	10	1108931852	1108931852 [1105-1115]			PREDICTED: pentatricopeptide repeat-containing protein At1g05670, mitochondrial [Beta vulgaris subsp. vulgaris]	1108931852	0	1276.66	11	19.4	9.6	291.5	273.4	80.3	32.7	45.1	71.5	153.5	23.1	245253	99725	2.17838e+06	2.63167e+06	1.33933e+06	183230	561549	975872	2.4526e+06	631169	529374	261700	7.97164e+06	7.47749e+06	2.19602e+06		893305
FALSE		High	Unambiguous	MNQDNPNWEGLLK	[-].MNQDNPNWEGLLK.[W]	1xAcetyl [N-Term]	1xAcetyl [N-Term]	0.000195684	5.15092e-05	1.144	1	1	3	731334119	731334119 [1-13]	731334119 1xAcetyl [N-Term]	731334119 1xAcetyl [N-Term]	PREDICTED: hsp70-binding protein 1 [Beta vulgaris subsp. vulgaris]	731334119	0	1600.74	13	28.1	52.3	24			27	148.9	315.6	171.5	232.6	140409	214466	70490.2			59610.6	729968	1697031	1.07898e+06	2.5053e+06	303069	562804	257955				290621
FALSE		High	Unambiguous	MMWLIDELGMEGFRAEVEKR	[R].MMWLIDELGMEGFRAEVEKR.[M]			6.9316e-05	5.15092e-05	1.281	1	1	9	731329402	731329402 [349-368]			PREDICTED: ferredoxin--nitrite reductase, chloroplastic [Beta vulgaris subsp. vulgaris]	731329402	2	2440.18	20	51.4	31.3	21.7	1.4	287.3	46.6	314.1	3.7	214.9	27.5	908167	454588	226345	19207	6.67755e+06	364522	5.45086e+06	70139.6	4.78653e+06	1.04728e+06	1.96026e+06	1.19294e+06	828298	54573.7	1.09488e+07		1.77717e+06
FALSE		High	Unambiguous	MMWLIDELGMEGFRAEVEK	[R].MMWLIDELGMEGFRAEVEK.[R]			1.47785e-05	5.15092e-05	1.485	1	1	2	731329402	731329402 [349-367]			PREDICTED: ferredoxin--nitrite reductase, chloroplastic [Beta vulgaris subsp. vulgaris]	731329402	1	2284.08	19							693.2		306.8								972906		552554
FALSE		High	Unambiguous	MMWLIDELGMEGFR	[R].MMWLIDELGMEGFR.[A]			1.956e-05	5.15092e-05	1.448	1	1	6	731329402	731329402 [349-362]			PREDICTED: ferredoxin--nitrite reductase, chloroplastic [Beta vulgaris subsp. vulgaris]	731329402	0	1727.8	14	72.7	391.6		24.4	77.3	99.9	28.7	173.4	101.6	30.3	1.00636e+06	4.46109e+06		256765	1.41007e+06	612611	391199	2.58812e+06	1.77386e+06	905994	2.17221e+06	1.17069e+07		729559	2.312e+06		2.98668e+06
FALSE		High	Unambiguous	MLVIGSEPPFKVK	[K].MLVIGSEPPFKVK.[G]			0.00031535	5.15092e-05	1.081	2	2	2	731313935; 731314510	731313935 [344-356]; 731314510 [342-354]			PREDICTED: elongation factor 1-gamma 2 [Beta vulgaris subsp. vulgaris] PREDICTED: elongation factor 1-gamma [Beta vulgaris subsp. vulgaris]	731313935; 731314510	1	1444.82	13	75.2	13.8				14.7	428.7	241.2	188.1	38.4	282055	42518.9				24474.2	1.58105e+06	975457	890109	311104	608808	111579					119320
FALSE		High	Unambiguous	MLVLFETPAGFALFK	[-].MLVLFETPAGFALFK.[V]			6.137e-06	5.15092e-05	1.601	1	1	3	731352088	731352088 [1-15]			PREDICTED: probable nucleolar protein 5-2 [Beta vulgaris subsp. vulgaris]	731352088	0	1683.92	15	165.1	238.2		35.2	18.7	329.8	120.2	7.9	71.3	13.7	1.82537e+06	2.16623e+06		295529	271950	1.6146e+06	1.30657e+06	94295.5	993918	326871	3.94001e+06	5.68466e+06		839700	445901		7.87173e+06
FALSE		High	Unambiguous	MLVGMVDVIFSDVAQPDQAR	[R].MLVGMVDVIFSDVAQPDQAR.[I]			7.34785e-09	5.15092e-05	2.489	2	2	4	731322006; 731325715	731322006 [219-238]; 731325715 [207-226]			PREDICTED: probable mediator of RNA polymerase II transcription subunit 36b [Beta vulgaris subsp. vulgaris] PREDICTED: mediator of RNA polymerase II transcription subunit 36a [Beta vulgaris subsp. vulgaris]	731322006; 731325715	0	2191.09	20			15.6		312.8		263.3	92.1	251.7	64.4			96214.7		4.29927e+06		2.70117e+06	1.03653e+06	3314112	1.45059e+06			352092		7.04927e+06
FALSE		High	Unambiguous	MLVGGAGDIKLTK	[K].MLVGGAGDIKLTK.[D]			1.2495e-07	5.15092e-05	2.115	1	1	10	731348344	731348344 [45-57]			PREDICTED: T-complex protein 1 subunit zeta 1 [Beta vulgaris subsp. vulgaris]	731348344	1	1302.74	13						76.3	170.5	301.3	128.4	323.6						993065	4.92539e+06	9.54391e+06	4.75968e+06	2.05304e+07							4.84152e+06
FALSE		High	Unambiguous	MLVGGAGDIK	[K].MLVGGAGDIK.[L]			0.000211082	5.15092e-05	1.134	1	1	6	731348344	731348344 [45-54]			PREDICTED: T-complex protein 1 subunit zeta 1 [Beta vulgaris subsp. vulgaris]	731348344	0	960.518	10	10.7		132.5	164	41.6	61.8	112.5	154.6	174.8	147.5	191265		1.40037e+06	2.23188e+06	980027	490091	1.98063e+06	2.9836e+06	3.9499e+06	5.70186e+06	412841		5.12457e+06	6.34155e+06	1.60689e+06		2.38936e+06
FALSE		High	Unambiguous	MLVDDIGDVTITNDGATILK	[K].MLVDDIGDVTITNDGATILK.[M]			1.39094e-05	5.15092e-05	1.493	1	1	2	731342049	731342049 [43-62]			PREDICTED: T-complex protein 1 subunit alpha [Beta vulgaris subsp. vulgaris]	731342049	0	2104.08	20			408.7	32.7	239.9	43.3	45.8	52.7	120.2	56.8			2.18893e+06	225218	2.86707e+06	174053	408505	515510	1.37593e+06	1113856			8.01027e+06	639922	4.70096e+06		848564
FALSE		High	Unambiguous	MITSEDSIIQPVIVK	[-].MITSEDSIIQPVIVK.[I]	1xAcetyl [N-Term]	1xAcetyl [N-Term]	0.00147733	5.15092e-05	0.877	1	1	2	731357317	731357317 [1-15]	731357317 1xAcetyl [N-Term]	731357317 1xAcetyl [N-Term]	PREDICTED: ATP-dependent 6-phosphofructokinase 3 [Beta vulgaris subsp. vulgaris]	731357317	0	1714.93	15				56.4	40.3	34.8	196.5	219.8	129.5	322.6				604032	747915	217277	2.72215e+06	3.33881e+06	2.30245e+06	9815046				1.71627e+06	1.22631e+06		1.0593e+06
FALSE		High	Unambiguous	MIVNKPLYVALAQR	[K].MIVNKPLYVALAQR.[K]			1.6185e-05	5.15092e-05	1.473	1	1	12	731360293	731360293 [384-397]			PREDICTED: polyadenylate-binding protein 2 [Beta vulgaris subsp. vulgaris]	731360293	0	1615.94	14	267.4	210.6	73.7	162	21.2	16	50.7	53.2	62.7	82.4	1.26135e+07	8.17131e+06	2.04929e+06	5.80607e+06	1.31441e+06	334379	2.34965e+06	2.70611e+06	3.73069e+06	8.39065e+06	2.72259e+07	2.14433e+07	7.49926e+06	1.64971e+07	2.15517e+06		1.63021e+06
FALSE		High	Unambiguous	MITSEDSIIQPVIVK	[-].MITSEDSIIQPVIVK.[I]			0.000143441	5.15092e-05	1.185	1	1	1	731357317	731357317 [1-15]			PREDICTED: ATP-dependent 6-phosphofructokinase 3 [Beta vulgaris subsp. vulgaris]	731357317	0	1672.92	15							241.9	451.8	186.4	119.8							1.53296e+06	3.14048e+06	1.51653e+06	1.66794e+06
FALSE		High	Unambiguous	MLTSDTAVIAETGDSWFNCQK	[K].MLTSDTAVIAETGDSWFNCQK.[L]	1xCarbamidomethyl [C19]	1xCarbamidomethyl [C19]	1.75403e-10	5.15092e-05	2.982	1	1	27	731331680	731331680 [421-441]			PREDICTED: pyruvate decarboxylase 2 [Beta vulgaris subsp. vulgaris]	731331680	0	2374.07	21	103.2	117.2	17.8	66.7	149.6	57.7	169.8	105.6	91.8	120.6	1.52058e+07	1.42024e+07	1.54642e+06	7.4591e+06	29019068	3.76097e+06	2.45757e+07	1.67717e+07	1.70655e+07	3.83486e+07	3.28213e+07	3.72702e+07	5.65902e+06	2.11939e+07	4.75809e+07		1.8336e+07
FALSE		High	Unambiguous	MITGDQLAIGKETGRR	[K].MITGDQLAIGKETGRR.[L]			2.3447e-06	5.15092e-05	1.728	2	5	3	731335165; 731354199	731335165 [513-528]; 731354199 [512-527]			PREDICTED: plasma membrane ATPase 1 [Beta vulgaris subsp. vulgaris] PREDICTED: plasma membrane ATPase 4 [Beta vulgaris subsp. vulgaris]	731335165; 731352800; 731354199; 731360081; 731360079	2	1745.93	16		0.4		5.4	2.6	87.9	316.3	275.6	42.7	269.2		7827.5		97998.5	81452.8	935810	7.47394e+06	7141376	1.29365e+06	1.39712e+07		20541		278448	133553		4.56238e+06
FALSE		High	Unambiguous	MITGDQLAIGKETGR	[K].MITGDQLAIGKETGR.[R]			3.88843e-09	5.15092e-05	2.573	2	5	10	731335165; 731354199	731335165 [513-527]; 731354199 [512-526]			PREDICTED: plasma membrane ATPase 1 [Beta vulgaris subsp. vulgaris] PREDICTED: plasma membrane ATPase 4 [Beta vulgaris subsp. vulgaris]	731335165; 731352800; 731354199; 731360081; 731360079	1	1589.83	15	3.7		20.2	6.4		176.2	197.6	164.4	163.9	267.5	117736		377053	153147		2.46937e+06	6.14545e+06	5.60897e+06	6.54413e+06	1.82742e+07	254130		1.3798e+06	435146			1.2039e+07
FALSE		High	Unambiguous	MITGDQLAIGK	[K].MITGDQLAIGK.[E]			0.000652395	5.15092e-05	0.985	2	5	11	731335165; 731354199	731335165 [513-523]; 731354199 [512-522]			PREDICTED: plasma membrane ATPase 1 [Beta vulgaris subsp. vulgaris] PREDICTED: plasma membrane ATPase 4 [Beta vulgaris subsp. vulgaris]	731335165; 731352800; 731354199; 731360081; 731360079	0	1146.62	11	49.3	19.8	145.6	299.4	1.1	45.6	101.8	141.8	83	112.6	1.79572e+06	594297	3.1302e+06	8.28891e+06	53238.3	735306	3.64472e+06	5.56777e+06	3.81336e+06	8.856e+06	3.87603e+06	1.55956e+06	1.14548e+07	2.35517e+07	87291.8		3.58486e+06
FALSE		High	Unambiguous	MISTSEEIAQVGTISANGEREIGELIAK	[R].MISTSEEIAQVGTISANGEREIGELIAK.[A]	1xOxidation [M1]	1xOxidation [M1]	8.10838e-09	5.15092e-05	2.476	1	1	1	731372887	731372887 [165-192]			PREDICTED: chaperonin CPN60-2, mitochondrial [Beta vulgaris subsp. vulgaris]	731372887	1	2962.5	28						822.2		96.8	81.1							1.18817e+06		340415	333817								5.79271e+06
FALSE		High	Unambiguous	MISTSEEIAQVGTISANGEREIGELIAK	[R].MISTSEEIAQVGTISANGEREIGELIAK.[A]			1.23716e-11	5.15092e-05	3.332	1	1	26	731372887	731372887 [165-192]			PREDICTED: chaperonin CPN60-2, mitochondrial [Beta vulgaris subsp. vulgaris]	731372887	1	2946.51	28	88.6	53.2	70.3	43.1	43.5	146.6	183.1	114.7	96.1	160.8	1.14302e+07	5.64426e+06	5.34958e+06	4.2234e+06	7.38352e+06	8.36976e+06	2.32095e+07	1.59403e+07	1.56371e+07	4.47809e+07	2.46718e+07	1.48117e+07	1.95765e+07	1.20002e+07	1.21063e+07		4.08053e+07
FALSE		High	Unambiguous	MISTSEEIAQVGTISANGER	[R].MISTSEEIAQVGTISANGER.[E]			0.000564981	5.15092e-05	1.004	1	1	4	731372887	731372887 [165-184]			PREDICTED: chaperonin CPN60-2, mitochondrial [Beta vulgaris subsp. vulgaris]	731372887	0	2093.02	20	39.2	10.5	318.7	250.1	8.2	52.6	145.8		139.2	35.8	317507	69700.9	1.52314e+06	1.53959e+06	87914.2	188556	1.16091e+06		1.42252e+06	626067	685331	182910	5.57384e+06	4.3745e+06	144148		919273
FALSE		High	Unambiguous	MLTSDTAVIAETGDSWFNCQK	[K].MLTSDTAVIAETGDSWFNCQK.[L]	1xCarbamidomethyl [C19]; 1xOxidation [M1]	1xCarbamidomethyl [C19]; 1xOxidation [M1]	0.00147733	5.15092e-05	0.877	1	1	1	731331680	731331680 [421-441]			PREDICTED: pyruvate decarboxylase 2 [Beta vulgaris subsp. vulgaris]	731331680	0	2390.06	21					1000										949826										1.55737e+06
FALSE		High	Unambiguous	MLVNVTADHR	[K].MLVNVTADHR.[I]			4.81844e-05	5.15092e-05	1.329	1	1	5	731340762	731340762 [447-456]			PREDICTED: dihydrolipoyllysine-residue acetyltransferase component 4 of pyruvate dehydrogenase complex, chloroplastic [Beta vulgaris subsp. vulgaris]	731340762	0	1155.59	10	93.5		42.7	171.2		46.1	142.2	198.7	170.8	134.8	719964		193715	1.00118e+06		157121	1.076e+06	1.6481e+06	1.65799e+06	2.23962e+06	1.55402e+06		708887	2.84469e+06			766015
FALSE		High	Unambiguous	MLVPAQKVGNIIGR	[R].MLVPAQKVGNIIGR.[K]			2.54993e-05	5.15092e-05	1.413	1	1	2	731328454	731328454 [155-168]			PREDICTED: flowering locus K homology domain [Beta vulgaris subsp. vulgaris]	731328454	1	1495.88	14	8.6		13.1	15.2	3.4	66.9	226	413.1	29.4	224.3	51121.2		46067.2	69029.5	26582.2	177120	1.32728e+06	2.66115e+06	221860	2.894e+06	110344		168580	196137	43585.4		863518
FALSE		High	Unambiguous	MLVSYVDSLPSGDEEGCFYALDLGGTNLR	[K].MLVSYVDSLPSGDEEGCFYALDLGGTNLR.[V]	1xCarbamidomethyl [C17]	1xCarbamidomethyl [C17]	2.49121e-06	5.15092e-05	1.72	1	1	1	731370942	731370942 [56-84]			PREDICTED: hexokinase-1 [Beta vulgaris subsp. vulgaris]	731370942	0	3178.47	29										1000										1949518
FALSE		High	Unambiguous	MMVVLGELGGRDEYSLVEALK	[K].MMVVLGELGGRDEYSLVEALK.[Q]			2.96543e-06	5.15092e-05	1.697	1	1	4	731322146	731322146 [225-245]			PREDICTED: ATP-citrate synthase beta chain protein 2 [Beta vulgaris subsp. vulgaris]	731322146	1	2309.19	21	364.5		132.6	13	3.3	102	256.7		62.3	65.6	4.05332e+06		869663	109773	48475.9	502388	2.80509e+06		873360	1.5756e+06	8.74899e+06		3.18248e+06	311903	79483.2		2.44931e+06
FALSE		High	Unambiguous	MMVDEDVELAKREK	[K].MMVDEDVELAKREK.[V]			2.10874e-06	5.15092e-05	1.742	1	1	3	731360648	731360648 [334-347]			PREDICTED: GDP-mannose 4,6 dehydratase 1 [Beta vulgaris subsp. vulgaris]	731360648	2	1692.83	14						50	213	454.8	196.6	85.7						148410	1.40397e+06	3.28845e+06	1.6638e+06	1.24043e+06							723547
FALSE		High	Unambiguous	MMVDEDVELAKR	[K].MMVDEDVELAKR.[E]			2.70454e-08	5.15092e-05	2.317	1	1	7	731360648	731360648 [334-345]			PREDICTED: GDP-mannose 4,6 dehydratase 1 [Beta vulgaris subsp. vulgaris]	731360648	1	1435.69	12	31.5	14.2	102.5	101.8	9.3	90.9	193	95.7	119	242	599262	222783	1.15228e+06	1.47371e+06	234376	766388	3.61381e+06	1.96548e+06	2.85827e+06	9.95127e+06	1.29349e+06	584629	4.2167e+06	4.18734e+06	384293		3.73639e+06
FALSE		High	Unambiguous	MMSKEESVLLVIR	[-].MMSKEESVLLVIR.[A]	1xAcetyl [N-Term]	1xAcetyl [N-Term]	3.17647e-05	5.15092e-05	1.384	1	1	1	1108898286	1108898286 [1-13]	1108898286 1xAcetyl [N-Term]	1108898286 1xAcetyl [N-Term]	PREDICTED: probable proteasome inhibitor [Beta vulgaris subsp. vulgaris]	1108898286	1	1576.84	13							344.2	376.1	169.3	110.4							946433	1134281	597555	666746
FALSE		High	Unambiguous	MMQMGGFGFDSSK	[R].MMQMGGFGFDSSK.[S]			7.94429e-05	5.15092e-05	1.263	1	1	2	731350850	731350850 [200-212]			PREDICTED: ER membrane protein complex subunit 3 [Beta vulgaris subsp. vulgaris]	731350850	0	1422.59	13				76.1		95.1	205	202.2	157	264.6				311481		226665	1.08469e+06	1.17345e+06	1.0664e+06	3.07622e+06				885026			1.10507e+06
FALSE		High	Unambiguous	MMMTSGEAVKYK	[R].MMMTSGEAVKYK.[SG]			0.000496741	5.15092e-05	1.021	2	2	1	731355267; 731325630	731355267 [316-327]; 731325630 [324-335]			PREDICTED: ADP,ATP carrier protein [Beta vulgaris subsp. vulgaris] PREDICTED: ADP,ATP carrier protein, mitochondrial [Beta vulgaris subsp. vulgaris]	731355267; 731325630	1	1375.64	12	5.1			21.6	14.4	10.8	198	259.4	103.8	386.8	8720.89			28038.5	32408.8	8204.58	332710	478007	223805	1.42765e+06	18823.8			79667.3	53138.8		40000.1
FALSE		High	Unambiguous	MMMTSGEAVK	[R].MMMTSGEAVK.[Y]	1xOxidation [M3]	1xOxidation [M1; M3]	0.000883113	5.15092e-05	0.945	2	2	1	731355267; 731325630	731355267 [316-325]; 731325630 [324-333]			PREDICTED: ADP,ATP carrier protein [Beta vulgaris subsp. vulgaris] PREDICTED: ADP,ATP carrier protein, mitochondrial [Beta vulgaris subsp. vulgaris]	731355267; 731325630	0	1100.48	10		231.4	494.9	273.8								495946	760752	542027								1.30147e+06	2.78393e+06	1.54009e+06
FALSE		High	Unambiguous	MMMTSGEAVK	[R].MMMTSGEAVK.[Y]			0.000238278	5.15092e-05	1.118	2	2	17	731355267; 731325630	731355267 [316-325]; 731325630 [324-333]			PREDICTED: ADP,ATP carrier protein [Beta vulgaris subsp. vulgaris] PREDICTED: ADP,ATP carrier protein, mitochondrial [Beta vulgaris subsp. vulgaris]	731355267; 731325630	0	1084.48	10	103	15.8	357.7	244.4	31.6	35.5	63.7	55.8	53.3	39.3	7.00881e+06	885697	1.43602e+07	1.26374e+07	2.82803e+06	1.07092e+06	4.25844e+06	4.09058e+06	4578987	5767072	1.51284e+07	2.32426e+06	5.25503e+07	3.59074e+07	4.63696e+06		5.22108e+06
FALSE		High	Unambiguous	MMMTFSVFPSPK	[R].MMMTFSVFPSPK.[V]			8.96801e-05	5.15092e-05	1.247	1	1	2	731348756	731348756 [163-174]			PREDICTED: tubulin beta-1 chain [Beta vulgaris subsp. vulgaris]	731348756	0	1402.66	12			45.1			92.1	186	212.1	290.6	174.2			139940			214433	961172	1.2023e+06	1.92757e+06	1.97746e+06			512104				1.04543e+06
FALSE		High	Unambiguous	MMLTFSVFPSPK	[R].MMLTFSVFPSPK.[V]	2xOxidation [M1; M2]	2xOxidation [M1; M2]	4.26839e-05	5.15092e-05	1.345	3	5	3	731325985; 731324610; 731360530	731325985 [163-174]; 731324610 [182-193]; 731360530 [168-179]			PREDICTED: tubulin beta-4 chain [Beta vulgaris subsp. vulgaris] PREDICTED: tubulin beta-6 chain isoform X1 [Beta vulgaris subsp. vulgaris] PREDICTED: tubulin beta chain [Beta vulgaris subsp. vulgaris]	731325985; 731324610; 731360530; 731331094; 731324612	0	1416.69	12				179.5		380.6	67.5		136.1	236.3				195874		242007	95276		246579	732443				556547			1.17986e+06
FALSE		High	Unambiguous	MMLTFSVFPSPK	[R].MMLTFSVFPSPK.[V]	1xOxidation [M]	1xOxidation [M1; M2]	1.84097e-05	5.15092e-05	1.456	3	5	15	731325985; 731324610; 731360530	731325985 [163-174]; 731324610 [182-193]; 731360530 [168-179]			PREDICTED: tubulin beta-4 chain [Beta vulgaris subsp. vulgaris] PREDICTED: tubulin beta-6 chain isoform X1 [Beta vulgaris subsp. vulgaris] PREDICTED: tubulin beta chain [Beta vulgaris subsp. vulgaris]	731325985; 731324610; 731360530; 731331094; 731324612	0	1400.7	12	76	39.7	85	48.4		178	151.5	140.2	133.2	148.1	721196	309696	475981	349388		748025	1.41313e+06	1.43416e+06	1.59508e+06	3.03414e+06	1.55669e+06	812709	1.74182e+06	992733			3.64687e+06
FALSE		High	Unambiguous	MMLTFSVFPSPK	[R].MMLTFSVFPSPK.[V]			2.3447e-06	5.15092e-05	1.728	3	5	38	731325985; 731324610; 731360530	731325985 [163-174]; 731324610 [182-193]; 731360530 [168-179]			PREDICTED: tubulin beta-4 chain [Beta vulgaris subsp. vulgaris] PREDICTED: tubulin beta-6 chain isoform X1 [Beta vulgaris subsp. vulgaris] PREDICTED: tubulin beta chain [Beta vulgaris subsp. vulgaris]	731325985; 731324610; 731360530; 731331094; 731324612	0	1384.7	12	120.1	145.8	41.5	117.6	31.5	65.6	117.2	119.1	80.7	160.9	9.55022e+06	9.54293e+06	1.94605e+06	7.10818e+06	3.30166e+06	2.3095e+06	9.16056e+06	1.02079e+07	8.10122e+06	27632349	2.06139e+07	2.50427e+07	7.12146e+06	2.01968e+07	5.41355e+06		1.12596e+07
FALSE		High	Unambiguous	MMELETDEGFQPVFFQPR	[R].MMELETDEGFQPVFFQPR.[R]			2.15722e-06	5.15092e-05	1.739	1	1	4	731362902	731362902 [373-390]			PREDICTED: splicing factor 3B subunit 3 [Beta vulgaris subsp. vulgaris]	731362902	0	2201	18	194.2	76.9					155.1	377.9		195.8	537061	174935					421330	1.12624e+06		1.16877e+06	1.15923e+06	459066
FALSE		High	Unambiguous	MMEGIVATSYSPGDKFYIDPAK	[K].MMEGIVATSYSPGDKFYIDPAK.[L]			4.46441e-06	5.15092e-05	1.643	1	1	2	731322724	731322724 [112-133]			PREDICTED: putative H/ACA ribonucleoprotein complex subunit 1-like protein 1 [Beta vulgaris subsp. vulgaris]	731322724	1	2420.15	22	15.8			43.6		45.9	209.5	328.1	325.3	31.9	75098.9			157882		96951.1	981387	1.68562e+06	1.95624e+06	328067	162099			448598			472669
FALSE		High	Unambiguous	MMAANLYFSQIEDLMFELSMFR	[R].MMAANLYFSQIEDLMFELSMFR.[C]			7.69409e-08	5.15092e-05	2.179	1	1	6	731329055	731329055 [309-330]			PREDICTED: phosphoenolpyruvate carboxylase 2 [Beta vulgaris subsp. vulgaris]	731329055	0	2687.24	22	54.9	148.6	303.4	251.3	186.5		55.3				787753	1.75308e+06	2.56734e+06	2738713	3521540		778935				1.70035e+06	4.60045e+06	9.39502e+06	7.78165e+06	5.77407e+06
FALSE		High	Unambiguous	MLYIEHCANSR	[R].MLYIEHCANSR.[A]	1xCarbamidomethyl [C7]	1xCarbamidomethyl [C7]	1.98473e-06	5.15092e-05	1.75	1	1	5	731342366	731342366 [367-377]			PREDICTED: T-complex protein 1 subunit epsilon [Beta vulgaris subsp. vulgaris]	731342366	0	1393.64	11	120	3	301.1	109.2	0.9	33.1	106.7	54.5	162	109.4	2.16217e+06	45050.5	3.20114e+06	1.4956e+06	21151	264096	1.88999e+06	1.05871e+06	3.68111e+06	4.25605e+06	4.66699e+06	118222	1.17144e+07	4.24953e+06	34680.1		1.28755e+06
FALSE		High	Unambiguous	MIYDVNSPLFR	[-].MIYDVNSPLFR.[S]			0.000220896	5.15092e-05	1.128	1	1	9	731368659	731368659 [1-11]			PREDICTED: wound-induced basic protein [Beta vulgaris subsp. vulgaris]	731368659	0	1354.68	11	87.2	182.6	11.8	62.7	84.6	108	65.4	162.3	71.4	164	2.37281e+06	4.08596e+06	188876	1.29707e+06	3.0322e+06	1.30064e+06	1.74905e+06	4.75997e+06	2.4515e+06	9.63244e+06	5.12166e+06	1.07224e+07	691181	3.68544e+06	4.97172e+06		6.34105e+06
FALSE		High	Unambiguous	MNVEKLMK	[-].MNVEKLMK.[M]	1xAcetyl [N-Term]	1xAcetyl [N-Term]	0.000889823	5.15092e-05	0.944	1	1	8	731312251	731312251 [1-8]	731312251 1xAcetyl [N-Term]	731312251 1xAcetyl [N-Term]	PREDICTED: nascent polypeptide-associated complex subunit beta-like [Beta vulgaris subsp. vulgaris]	731312251	1	1034.54	8			5.1	0.8		70.2	152	382.9	87.4	301.5			217388	44634.8		2.25025e+06	1.08123e+07	2.98697e+07	7.98112e+06	47108759			795517	126823			1.09707e+07
FALSE		High	Unambiguous	MSDEEHQFESKADSGASK	[-].MSDEEHQFESKADSGASK.[T]	1xMet-loss+Acetyl [N-Term]	1xMet-loss+Acetyl [N-Term]	1.90535e-11	5.15092e-05	3.275	1	1	7	731343825	731343825 [1-18]	731343825 1xMet-loss+Acetyl [N-Term]	731343825 1xMet-loss+Acetyl [N-Term]	PREDICTED: eukaryotic translation initiation factor 5A [Beta vulgaris subsp. vulgaris]	731343825	1	1893.81	18					0.7	101.7	170.1	290.9	161.3	275.4					40865.3	2.07185e+06	7.69166e+06	14425376	9.35865e+06	2.73565e+07					67004.4		1.0101e+07
FALSE		High	Unambiguous	DAKLSFSDLDEVILVGGSTR	[R].DAKLSFSDLDEVILVGGSTR.[I]	3xGG [K3; S5; S7]	3xGG [K3; S5; S7]	0.0139286	0.000377453	0.579	1	1	1	731341153	731341153 [394-413]			PREDICTED: stromal 70 kDa heat shock-related protein, chloroplastic [Beta vulgaris subsp. vulgaris]	731341153	1	2464.23	20
FALSE		High	Unambiguous	MNVSATDFR	[-].MNVSATDFR.[N]	1xAcetyl [N-Term]	1xAcetyl [N-Term]	0.000151253	5.15092e-05	1.178	1	1	7	731336938	731336938 [1-9]	731336938 1xAcetyl [N-Term]	731336938 1xAcetyl [N-Term]	PREDICTED: probable 2-oxoglutarate-dependent dioxygenase At3g49630 [Beta vulgaris subsp. vulgaris]	731336938	0	1082.49	9	26		66.1	37.2	2.3	57.5	107.2	337.1	142.1	224.6	434782		652496	472984	51567.2	426003	1.76494e+06	6083835	3.00158e+06	8.11843e+06	938466		2.38777e+06	1.34391e+06	84551.8		2.07691e+06
FALSE		High	Unambiguous	MRPIFCGNFDFDAR	[-].MRPIFCGNFDFDAR.[S]	1xCarbamidomethyl [C6]	1xCarbamidomethyl [C6]	0.000262935	5.15092e-05	1.105	1	1	4	731363572	731363572 [1-14]			PREDICTED: serine/arginine-rich splicing factor RS40 isoform X1 [Beta vulgaris subsp. vulgaris]	731363572	0	1745.79	14	45.9					45.3	152.5	259.1	145.8	351.4	343049					149706	1.11874e+06	2085061	1372861	5.6644e+06	740463						729866
FALSE		High	Unambiguous	MREIMVNQASSCDLKDLVAK	[K].MREIMVNQASSCDLKDLVAK.[F]	1xCarbamidomethyl [C12]	1xCarbamidomethyl [C12]	8.11315e-08	5.15092e-05	2.172	1	1	4	731328493	731328493 [168-187]			PREDICTED: 40S ribosomal protein S3a [Beta vulgaris subsp. vulgaris]	731328493	2	2308.15	20		350.1	18		10.8	13.4	190.9	234.7	16.3	165.7		2315214	85582.3		114250	47604.1	1.50848e+06	2.03346e+06	165115	2.87528e+06		6.07562e+06	313183		187329		232086
FALSE		High	Unambiguous	MREILHIQGGQCGNQIGSK	[-K].MREILHIQGGQCGNQIGSK.[F]	1xCarbamidomethyl [C12]	1xCarbamidomethyl [C12]	2.9327e-12	5.15092e-05	3.522	4	5	28	731325985; 731324610; 731360530; 731348756	731325985 [1-19]; 731324610 [20-38]; 731360530 [1-19]; 731348756 [1-19]			PREDICTED: tubulin beta-4 chain [Beta vulgaris subsp. vulgaris] PREDICTED: tubulin beta-6 chain isoform X1 [Beta vulgaris subsp. vulgaris] PREDICTED: tubulin beta chain [Beta vulgaris subsp. vulgaris] PREDICTED: tubulin beta-1 chain [Beta vulgaris subsp. vulgaris]	731325985; 731324610; 731360530; 731324612; 731348756	1	2126.06	19	26.1	48.7	21.9	3.2	2.6	208.1	193.8	70.5	185.2	239.9	2.65065e+06	4.07181e+06	1.31339e+06	246441	351762	9.37188e+06	1.93649e+07	7.72855e+06	2.37611e+07	5.26556e+07	5.72136e+06	1.06853e+07	4.80629e+06	700225	576764		4.5691e+07
FALSE		High	Unambiguous	MQYLFDDTGRR	[K].MQYLFDDTGRR.[Y]			2.77154e-05	5.15092e-05	1.402	1	1	7	731326779	731326779 [87-97]			PREDICTED: alanine--glyoxylate aminotransferase 2 homolog 1, mitochondrial [Beta vulgaris subsp. vulgaris]	731326779	1	1401.66	11	95.4	130.3	10.5	134	83.9	42.7	93.7	135.7	132.8	140.9	2.10431e+06	2.3644e+06	137142	2.24589e+06	2.43516e+06	417468	2.03131e+06	3225346	3695128	6.70878e+06	4.54209e+06	6.20469e+06	501864	6.38135e+06	3.99279e+06		2.0353e+06
FALSE		High	Unambiguous	MQRYDDEAFALYDELFSYACPK	[R].MQRYDDEAFALYDELFSYACPK.[F]	1xCarbamidomethyl [C20]	1xCarbamidomethyl [C20]	1.47613e-07	5.15092e-05	2.093	1	1	11	731317184	731317184 [361-382]			PREDICTED: eukaryotic translation initiation factor 3 subunit L [Beta vulgaris subsp. vulgaris]	731317184	1	2732.2	22				26.1	5.9	160	331.1	212.4	264.5					443885	172917	1.58466e+06	7.27894e+06	5.11934e+06	7.46176e+06					1.26123e+06	283522		7.72572e+06
FALSE		High	Unambiguous	MQQGSGSETQVTWEDQQNINKFSK	[-].MQQGSGSETQVTWEDQQNINKFSK.[L]	1xAcetyl [N-Term]	1xAcetyl [N-Term]	4.76823e-10	5.15092e-05	2.85	1	1	4	731328072	731328072 [1-24]	731328072 1xAcetyl [N-Term]	731328072 1xAcetyl [N-Term]	PREDICTED: probable prefoldin subunit 4 isoform X1 [Beta vulgaris subsp. vulgaris]	731328072	1	2812.28	24					6.8	54.8	210.8	210.7	180.9	336					98933	269924	2.30412e+06	2.5253e+06	2.5377e+06	8064630					162215		1.31597e+06
FALSE		High	Unambiguous	MQPDASGKYPYTGSMDCAMK	[K].MQPDASGKYPYTGSMDCAMK.[T]	1xCarbamidomethyl [C17]	1xCarbamidomethyl [C17]	5.35758e-05	5.15092e-05	1.315	1	1	3	731364147	731364147 [236-255]			PREDICTED: mitochondrial dicarboxylate/tricarboxylate transporter DTC [Beta vulgaris subsp. vulgaris]	731364147	1	2237.93	20	116.6					99.3	183.2	151	172.5	277.4	658266					248048	1.016e+06	918647	1.22826e+06	3378988	1.42085e+06						1.20931e+06
FALSE		High	Unambiguous	MRPNAIALVDAFNYTDHFLGSVLGR	[K].MRPNAIALVDAFNYTDHFLGSVLGR.[Y]			2.33646e-12	5.15092e-05	3.552	1	1	2	731332207	731332207 [599-623]			PREDICTED: peroxisomal acyl-coenzyme A oxidase 1 [Beta vulgaris subsp. vulgaris]	731332207	0	2777.42	25	44	154.3	254	144.4	337.5	6.2	3.2		34	22.4	1.42953e+06	4124224	4.87012e+06	3.56479e+06	14439166	89336.9	103729		1394497	1.56928e+06	3.0856e+06	1.08228e+07	1.78219e+07	1.01288e+07	2.36751e+07		435547
FALSE		High	Unambiguous	MQNDEGEIMDLYIPRK	[-].MQNDEGEIMDLYIPRK.[C]	1xAcetyl [N-Term]	1xAcetyl [N-Term]	2.66231e-09	5.15092e-05	2.623	1	1	7	731327015	731327015 [1-16]	731327015 1xAcetyl [N-Term]	731327015 1xAcetyl [N-Term]	PREDICTED: 40S ribosomal protein S21 [Beta vulgaris subsp. vulgaris]	731327015	1	1993.94	16	5		6.2	21.3	34.1	37.3	104.2	422.7	121	248.2	176421		128414	571348	1.58539e+06	582829	3615367	16077703	5.38779e+06	18908919	380800		469923	1.6234e+06	2.59948e+06		2.84149e+06
FALSE		High	Unambiguous	MQNDEGEIMDLYIPR	[-].MQNDEGEIMDLYIPR.[K]	1xAcetyl [N-Term]	1xAcetyl [N-Term]	1.63841e-10	5.15092e-05	2.991	1	1	44	731327015	731327015 [1-15]	731327015 1xAcetyl [N-Term]	731327015 1xAcetyl [N-Term]	PREDICTED: 40S ribosomal protein S21 [Beta vulgaris subsp. vulgaris]	731327015	0	1865.84	15	36	18.2	61.1	65	151.8	55.3	93.2	227.6	126.3	165.5	6242439	2.59101e+06	6.25752e+06	8.564e+06	3.4681e+07	4.24815e+06	1.5895e+07	4.25556e+07	2.76468e+07	6.19894e+07	1.34742e+07	6.79937e+06	2.2899e+07	2.43333e+07	5.68644e+07		2.07111e+07
FALSE		High	Unambiguous	MQIIEEAEEYKR	[R].MQIIEEAEEYKR.[A]	1xOxidation [M1]	1xOxidation [M1]	0.000128034	5.15092e-05	1.2	1	1	5	731350516	731350516 [143-154]			PREDICTED: clathrin light chain 2 [Beta vulgaris subsp. vulgaris]	731350516	1	1554.75	12	80.1	12.4	32.5	73.1		245.3	37.1	349.5	70.7	99.2	443601	56586.7	106225	307586		601291	202013	2.08519e+06	493774	1.18549e+06	957502	148496	388725	873961			2.93149e+06
FALSE		High	Unambiguous	MQIIEEAEEYKR	[R].MQIIEEAEEYKR.[A]			1.17602e-07	5.15092e-05	2.123	1	1	53	731350516	731350516 [143-154]			PREDICTED: clathrin light chain 2 [Beta vulgaris subsp. vulgaris]	731350516	1	1538.75	12	5.8	54.5	24.7	63.6	100.9	102.7	134.8	165.8	120.3	226.9	1.199e+06	9.23938e+06	2.99849e+06	9.95607e+06	2.7361e+07	9.36435e+06	2.72946e+07	3.68207e+07	3.12618e+07	1.00881e+08	2.58802e+06	2.42461e+07	1.09728e+07	2.82887e+07	4.48622e+07		4.56543e+07
FALSE		High	Unambiguous	DPASITTDDFVYTGFRGER	[K].DPASITTDDFVYTGFRGER.[T]	1xGG [S4]	1xGG [S4]	0.0140329	0.000377453	0.578	1	1	1	731320515	731320515 [42-60]			PREDICTED: auxin-binding protein ABP19a [Beta vulgaris subsp. vulgaris]	731320515	1	2261.05	19
FALSE		High	Unambiguous	GGSGSGYGSGYGSGYGSGGGLGGSGGGGRGGGGGGGSGR	[R].GGSGSGYGSGYGSGYGSGGGLGGSGGGGRGGGGGGGSGR.[G]	1xGG [S]	1xGG [S24; S37]	0.0205042	0.000413429	0.527	1	1	2	731358291	731358291 [60-98]			PREDICTED: glycine-rich cell wall structural protein 2-like [Beta vulgaris subsp. vulgaris]	731358291	1	3139.32	39
FALSE		High	Unambiguous	MQIFVKTLTGK	[-G].MQIFVKTLTGK.[T]			0.00111662	5.15092e-05	0.914	3	9	1	731368198; 731328639; 731311369	731368198 [1-11]; 731328639 [1-11]; 731311369 [1-11]; [77-87]; [153-163]; [229-239]; [305-315]; [381-391]			PREDICTED: ubiquitin-NEDD8-like protein RUB2 [Beta vulgaris subsp. vulgaris] PREDICTED: ubiquitin-40S ribosomal protein S27a [Beta vulgaris subsp. vulgaris] PREDICTED: polyubiquitin-like [Beta vulgaris subsp. vulgaris]	731345004; 731364922; 731345012; 731371857; 731344996; 731368198; 731328639; 731311369; 731368972	1	1265.73	11				71.7				817.8		110.5				60017.1				971682		262985				170530
FALSE		High	Unambiguous	MQLAEGEHISGCSVR	[R].MQLAEGEHISGCSVR.[H]	1xCarbamidomethyl [C12]	1xCarbamidomethyl [C12]	6.81973e-07	5.15092e-05	1.891	1	1	1	731357332	731357332 [26-40]			PREDICTED: protein GOS9-like [Beta vulgaris subsp. vulgaris]	731357332	0	1673.77	15						75.9	191.2	293.8	139.3	299.9						481935	2.69279e+06	4.5382e+06	2517968	9277874							2.34959e+06
FALSE		High	Unambiguous	MQNDEGEIMDLYIPR	[-].MQNDEGEIMDLYIPR.[K]	1xAcetyl [N-Term]; 1xOxidation [M9]	1xAcetyl [N-Term]; 1xOxidation [M9]	6.32214e-07	5.15092e-05	1.901	1	1	12	731327015	731327015 [1-15]	731327015 1xAcetyl [N-Term]	731327015 1xAcetyl [N-Term]	PREDICTED: 40S ribosomal protein S21 [Beta vulgaris subsp. vulgaris]	731327015	0	1881.84	15	57.7		91.6	73.2	24.9	217.4	179.1	185	63.4	107.7	1.13296e+06		1.06018e+06	1.09106e+06	644223	1.88882e+06	3.45361e+06	3.91355e+06	1.56832e+06	4.56155e+06	2.44548e+06		3.87966e+06	3.10009e+06	1.05629e+06		9.20862e+06
FALSE		High	Unambiguous	MQKPLPELLQEYDLAAGIFPR	[K].MQKPLPELLQEYDLAAGIFPR.[D]			2.94471e-05	5.15092e-05	1.394	1	1	2	731331730	731331730 [50-70]			PREDICTED: uncharacterized protein At5g01610 [Beta vulgaris subsp. vulgaris]	731331730	0	2429.29	21	60.7			306.2				58.2		574.9	154060			590460				159255		3.15038e+06	332535			1.6777e+06
FALSE		High	Unambiguous	MRPPEYWVQEDGSIAK	[K].MRPPEYWVQEDGSIAK.[I]			5.31423e-06	5.15092e-05	1.62	1	1	10	731358608	731358608 [459-474]			PREDICTED: diaminopimelate decarboxylase 2, chloroplastic [Beta vulgaris subsp. vulgaris]	731358608	0	1905.92	16	11.2	105		61	62	79.4	97.6	196.5	119.9	267.5	276005	2.12179e+06		1.13835e+06	2.00742e+06	863928	2.35648e+06	5.20516e+06	3.71532e+06	1.41903e+07	595749	5.56803e+06		3.23446e+06	3.29145e+06		4.21194e+06
FALSE		High	Unambiguous	MSAEASREENVYMAK	[-].MSAEASREENVYMAK.[L]	1xMet-loss+Acetyl [N-Term]	1xMet-loss+Acetyl [N-Term]	2.51159e-05	5.15092e-05	1.415	1	1	23	731315739	731315739 [1-15]	731315739 1xMet-loss+Acetyl [N-Term]	731315739 1xMet-loss+Acetyl [N-Term]	PREDICTED: 14-3-3-like protein [Beta vulgaris subsp. vulgaris]	731315739	1	1626.74	15	14.6	2.6	28.8	50.4	19	65.3	226.8	226.4	157.2	209	2.69045e+06	390362	3.13464e+06	7.04776e+06	4.60153e+06	5.32817e+06	41058443	4.4946e+07	3.65299e+07	8.31145e+07	5.80727e+06	1.02439e+06	1.1471e+07	2.00252e+07	7.54486e+06		2.59766e+07
FALSE		High	Unambiguous	MSDEEHQFESKADAGASKTFPQQAGTIR	[-].MSDEEHQFESKADAGASKTFPQQAGTIR.[K]	1xMet-loss+Acetyl [N-Term]	1xMet-loss+Acetyl [N-Term]	2.85185e-08	5.15092e-05	2.31	2	2	7	731343821; 731343827	731343821 [1-28]; 731343827 [1-28]	731343821 1xMet-loss+Acetyl [N-Term]; 731343827 1xMet-loss+Acetyl [N-Term]	731343821 1xMet-loss+Acetyl [N-Term]; 731343827 1xMet-loss+Acetyl [N-Term]	PREDICTED: eukaryotic translation initiation factor 5A [Beta vulgaris subsp. vulgaris] PREDICTED: eukaryotic translation initiation factor 5A [Beta vulgaris subsp. vulgaris]	731343821; 731343827	2	2977.39	28						70.8	207.4	303.2	133.2	285.4						1.05011e+06	6.83343e+06	1.09546e+07	5.63085e+06	2.06556e+07							5.11963e+06
FALSE		High	Unambiguous	MSDEEHQFESKADAGASK	[-].MSDEEHQFESKADAGASK.[T]	1xPhospho [D/E/S]; 1xMet-loss+Acetyl [N-Term]	1xPhospho [S2; D3; E4]; 1xMet-loss+Acetyl [N-Term]	1.98473e-06	5.15092e-05	1.75	2	2	14	731343821; 731343827	731343821 [1-18]; 731343827 [1-18]	731343821 1xPhospho [S2; D3; E4]; 1xMet-loss+Acetyl [N-Term]; 731343827 1xPhospho [S2; D3; E4]; 1xMet-loss+Acetyl [N-Term]	731343821 1xPhospho [S/D/E]; 1xMet-loss+Acetyl [N-Term]; 731343827 1xPhospho [S/D/E]; 1xMet-loss+Acetyl [N-Term]	PREDICTED: eukaryotic translation initiation factor 5A [Beta vulgaris subsp. vulgaris] PREDICTED: eukaryotic translation initiation factor 5A [Beta vulgaris subsp. vulgaris]	731343821; 731343827	1	1957.78	18	1.6	2.3	42.4	27.5	0.4	34.2	175.8	257.2	190.5	268	67012.4	79260.5	1.03635e+06	867542	19675.1	628055	7.16085e+06	1.14927e+07	9.96316e+06	2.39825e+07	144645	207997	3.79248e+06	2.46499e+06	32260.1		3.06198e+06
FALSE		High	Unambiguous	MSDEEHQFESKADAGASK	[-].MSDEEHQFESKADAGASK.[T]	1xMet-loss+Acetyl [N-Term]	1xMet-loss+Acetyl [N-Term]	1.54025e-12	5.15092e-05	3.607	2	2	9	731343821; 731343827	731343821 [1-18]; 731343827 [1-18]	731343821 1xMet-loss+Acetyl [N-Term]; 731343827 1xMet-loss+Acetyl [N-Term]	731343821 1xMet-loss+Acetyl [N-Term]; 731343827 1xMet-loss+Acetyl [N-Term]	PREDICTED: eukaryotic translation initiation factor 5A [Beta vulgaris subsp. vulgaris] PREDICTED: eukaryotic translation initiation factor 5A [Beta vulgaris subsp. vulgaris]	731343821; 731343827	1	1877.81	18	0.2		4.4	31.4	0.4	135.5	182.2	244.6	159.8	241.5	23904.7		345254	3.20428e+06	70532.4	8.05019e+06	2.40221e+07	3.53552e+07	2.70425e+07	69913119	51597.6		1.26344e+06	9.10448e+06	115648		3.92473e+07
FALSE		High	Unambiguous	MSDEEHQFESK	[-].MSDEEHQFESK.[A]	1xMet-loss+Acetyl [N-Term]	1xMet-loss+Acetyl [N-Term]	3.29532e-07	5.15092e-05	1.987	3	3	35	731343821; 731343827; 731343825	731343821 [1-11]; 731343827 [1-11]; 731343825 [1-11]	731343821 1xMet-loss+Acetyl [N-Term]; 731343827 1xMet-loss+Acetyl [N-Term]; 731343825 1xMet-loss+Acetyl [N-Term]	731343821 1xMet-loss+Acetyl [N-Term]; 731343827 1xMet-loss+Acetyl [N-Term]; 731343825 1xMet-loss+Acetyl [N-Term]	PREDICTED: eukaryotic translation initiation factor 5A [Beta vulgaris subsp. vulgaris] PREDICTED: eukaryotic translation initiation factor 5A [Beta vulgaris subsp. vulgaris] PREDICTED: eukaryotic translation initiation factor 5A [Beta vulgaris subsp. vulgaris]	731343821; 731343827; 731343825	0	1277.53	11	68.3	8.8	232.9	132	54.7	71.7	72.3	124.2	116.4	118.8	1.25527e+07	1.33372e+06	2.52607e+07	1.84379e+07	1.32368e+07	5.83631e+06	13057712	2.46048e+07	2.69841e+07	4.71261e+07	2.70946e+07	3.49998e+06	9.24401e+07	5.23886e+07	2.17036e+07		2.84539e+07
FALSE		High	Unambiguous	MSDDEREEQELDLTYPEVVTKYK	[-].MSDDEREEQELDLTYPEVVTKYK.[S]	1xPhospho [D/E/R/S]; 1xMet-loss+Acetyl [N-Term]	1xPhospho [S2; D3; D4; E5; R6; E7; E8]; 1xMet-loss+Acetyl [N-Term]	0.00145515	5.15092e-05	0.879	1	1	25	1108915337	1108915337 [1-23]	1108915337 1xPhospho [S2; D3; D4; E5; R6; E7; E8]; 1xMet-loss+Acetyl [N-Term]	1108915337 1xPhospho [D/S/E/R]; 1xMet-loss+Acetyl [N-Term]	PREDICTED: ERBB-3 BINDING PROTEIN 1 [Beta vulgaris subsp. vulgaris]	1108915337	2	2808.25	23						41.1	199.1	390.9	104.9	263.9						399242	4289511	9235628	2.90144e+06	12488708							1.94644e+06
FALSE		High	Unambiguous	MSDALINGLAGAGGGIIAQLITYPLQTVNTR	[-].MSDALINGLAGAGGGIIAQLITYPLQTVNTR.[Q]	1xMet-loss+Acetyl [N-Term]	1xMet-loss+Acetyl [N-Term]	0.0014333	5.15092e-05	0.881	1	1	1	731315138	731315138 [1-31]	731315138 1xMet-loss+Acetyl [N-Term]	731315138 1xMet-loss+Acetyl [N-Term]	PREDICTED: peroxisomal nicotinamide adenine dinucleotide carrier [Beta vulgaris subsp. vulgaris]	731315138	0	3039.65	31										1000										506484
FALSE		High	Unambiguous	MSATEEESAVKEPLDLIR	[-].MSATEEESAVKEPLDLIR.[L]	1xMet-loss+Acetyl [N-Term]	1xMet-loss+Acetyl [N-Term]	1.16509e-10	5.15092e-05	3.036	1	1	12	731313514	731313514 [1-18]	731313514 1xMet-loss+Acetyl [N-Term]	731313514 1xMet-loss+Acetyl [N-Term]	PREDICTED: sm-like protein LSM3A [Beta vulgaris subsp. vulgaris]	731313514	1	1928.98	18			3.7	50.2		55.1	151	338.7	143.2	258			105488	1.82395e+06		1.16697e+06	7.09349e+06	1.74543e+07	8.63451e+06	2.66231e+07			386025	5.18249e+06			5.68937e+06
FALSE		High	Unambiguous	MRPPEYWVQEDGSIAKIR	[K].MRPPEYWVQEDGSIAKIR.[H]			2.58739e-06	5.15092e-05	1.715	1	1	1	731358608	731358608 [459-476]			PREDICTED: diaminopimelate decarboxylase 2, chloroplastic [Beta vulgaris subsp. vulgaris]	731358608	1	2175.1	18						22.7	608.7	311.8		56.8						19047.2	1.13394e+06	636930		232353							92861.3
FALSE		High	Unambiguous	MSASSLLNTLLR	[R].MSASSLLNTLLR.[A]	1xOxidation [M1]	1xOxidation [M1]	1.7996e-05	5.15092e-05	1.459	1	2	1	731362092	731362092 [112-123]			PREDICTED: uncharacterized protein LOC104905777 isoform X1 [Beta vulgaris subsp. vulgaris]	731362094; 731362092	0	1321.71	12	22.2		475.2	92.9	34.8	291.9		42.4		40.6	28808.3		363569	91582.3	59352.2	167641		59330.7		113610	62182		1.33046e+06	260218	97316.3		817307
FALSE		High	Unambiguous	MSAPPKTDVPIITPNELAEADGFLFGFPTR	[K].MSAPPKTDVPIITPNELAEADGFLFGFPTR.[F]			6.82371e-06	5.15092e-05	1.587	1	1	2	731370577	731370577 [52-81]			PREDICTED: probable NAD(P)H dehydrogenase (quinone) FQR1-like 1 [Beta vulgaris subsp. vulgaris]	731370577	1	3231.64	30							406	120	474.1								1.94044e+06	628778	2.90813e+06
FALSE		High	Unambiguous	MSAPPKTDAPIITPNELADADGFIFGFPTR	[K-].MSAPPKTDAPIITPNELADADGFIFGFPTR.[F]			7.79781e-11	5.15092e-05	3.089	1	2	26	731365038	731365038 [52-81]			PREDICTED: NAD(P)H dehydrogenase (quinone) FQR1 isoform X1 [Beta vulgaris subsp. vulgaris]	731365038; 1108797504	1	3189.59	30	51.7	96.3	93.5	70.9	196.1	200	41.9	88.5	77.5	83.5	6.02562e+06	9.2286e+06	6.4261e+06	6.27849e+06	3.0068e+07	1.03128e+07	4.79224e+06	1.11109e+07	1.13935e+07	2.10034e+07	1.30062e+07	2.42178e+07	2.35159e+07	1.78394e+07	4.93008e+07		5.02784e+07
FALSE		High	Unambiguous	MSAMMQPQIILLKEGTDTSQGKAQLISNINACSAIADVVR	[-].MSAMMQPQIILLKEGTDTSQGKAQLISNINACSAIADVVR.[T]	1xCarbamidomethyl [C32]; 1xMet-loss+Acetyl [N-Term]	1xCarbamidomethyl [C32]; 1xMet-loss+Acetyl [N-Term]	8.17965e-07	5.15092e-05	1.867	1	1	1	731328839	731328839 [1-40]	731328839 1xMet-loss+Acetyl [N-Term]	731328839 1xMet-loss+Acetyl [N-Term]	PREDICTED: T-complex protein 1 subunit eta [Beta vulgaris subsp. vulgaris]	731328839	2	4214.16	40
FALSE		High	Unambiguous	MSAMMQPQIILLK	[-].MSAMMQPQIILLK.[E]	1xMet-loss+Acetyl [N-Term]	1xMet-loss+Acetyl [N-Term]	0.000364155	5.15092e-05	1.062	1	1	8	731328839	731328839 [1-13]	731328839 1xMet-loss+Acetyl [N-Term]	731328839 1xMet-loss+Acetyl [N-Term]	PREDICTED: T-complex protein 1 subunit eta [Beta vulgaris subsp. vulgaris]	731328839	0	1414.78	13	77.9		69.8	64.5	63.6	38.5	102.1	241.7	134.2	207.7	1.70423e+06		900180	1.07122e+06	1.82956e+06	372695	2193182	5.69506e+06	3.70159e+06	9801112	3.67854e+06		3.29416e+06	3.04371e+06	2.99982e+06		1.81701e+06
FALSE		High	Unambiguous	MSAMDSSSRNAGEMLDRLTLTYNR	[R].MSAMDSSSRNAGEMLDRLTLTYNR.[T]			0.000249357	5.15092e-05	1.112	1	1	2	731366699	731366699 [278-301]			PREDICTED: ATP synthase subunit gamma, mitochondrial [Beta vulgaris subsp. vulgaris]	731366699	2	2719.26	24							298	665.9	36.2								963538	2.36148e+06	150124
FALSE		High	Unambiguous	KDVRPAPSSLAVSEMKVGDRPSEK	[K].KDVRPAPSSLAVSEMKVGDRPSEK.[D]	1xPhospho [D/R/S]; 1xGG [K16]	1xPhospho [D2; R4; S8; S9; S13]; 1xGG [S8; K16]	0.0420916	0.00101231	0.429	1	3	5	731310789	731310789 [218-241]	731310789 1xPhospho [D219; R221; S225; S226; S230]	731310789 1xPhospho [R/D/S]	PREDICTED: translation initiation factor eIF-2B subunit delta isoform X1 [Beta vulgaris subsp. vulgaris]	1108870292; 731310789; 1108870288	2	2777.37	24
FALSE		High	Unambiguous	MSAEASREENVYMAK	[-].MSAEASREENVYMAK.[L]	1xOxidation [M13]; 1xMet-loss+Acetyl [N-Term]	1xOxidation [M13]; 1xMet-loss+Acetyl [N-Term]	2.22487e-05	5.15092e-05	1.431	1	1	4	731315739	731315739 [1-15]	731315739 1xMet-loss+Acetyl [N-Term]	731315739 1xMet-loss+Acetyl [N-Term]	PREDICTED: 14-3-3-like protein [Beta vulgaris subsp. vulgaris]	731315739	1	1642.74	15	82.4		237.2	84.8	19.5		91.8	209.7	86.2	188.4	588461		998727	459894	182934		644058	1.61325e+06	775701	2.90254e+06	1.27018e+06		3.65478e+06	1.30672e+06	299947
FALSE		High	Unambiguous	MSASSLLNTLLR	[R].MSASSLLNTLLR.[A]			8.37256e-06	5.15092e-05	1.56	1	2	1	731362092	731362092 [112-123]			PREDICTED: uncharacterized protein LOC104905777 isoform X1 [Beta vulgaris subsp. vulgaris]	731362094; 731362092	0	1305.72	12					965.7		26.8			7.4					5.73675e+06		119056			72172.4					9.40622e+06
FALSE		High	Unambiguous	MQGGSTGIGYGLK	[-].MQGGSTGIGYGLK.[Y]	1xAcetyl [N-Term]	1xAcetyl [N-Term]	1.88221e-06	5.15092e-05	1.757	1	1	1	731362305	731362305 [1-13]	731362305 1xAcetyl [N-Term]	731362305 1xAcetyl [N-Term]	PREDICTED: WD repeat-containing protein DWA2 [Beta vulgaris subsp. vulgaris]	731362305	0	1310.64	13	87			90.7		102			268.3	451.9	155925			123540		80990.6			606611	1.74867e+06	336560			351022			394856
FALSE		High	Unambiguous	MQETLTNFNEKETEAK	[K].MQETLTNFNEKETEAK.[S]			7.5256e-07	5.15092e-05	1.878	1	1	4	731317764	731317764 [404-419]			PREDICTED: myosin-11 [Beta vulgaris subsp. vulgaris]	731317764	1	1912.9	16	8.2	9.1	88.1	15.1	16.3	253.5	136	128.4	175.3	170	108182	98854.6	688194	151523	284134	1.48605e+06	1.76922e+06	1.83169e+06	2.92721e+06	4.85878e+06	233509	259416	2.5184e+06	430531	465878		7.24501e+06
FALSE		High	Unambiguous	MQELVLYK	[K].MQELVLYK.[S]			0.000366924	5.15092e-05	1.061	2	3	1	731314530; 731358082	731314530 [649-656]; 731358082 [586-593]			PREDICTED: epidermal growth factor receptor substrate 15-like 1 [Beta vulgaris subsp. vulgaris] PREDICTED: epidermal growth factor receptor substrate 15-like 1 isoform X1 [Beta vulgaris subsp. vulgaris]	731314530; 731358082; 731358084	0	1023.55	8	2.7	20.6		6.1		328.2	99.5	2.4	179.4	361.1	4012.65	25578.7		6991.86		218809	147301	3848.39	340775	1.17385e+06	8661.2	67123.9		19866.3			1.06677e+06
FALSE		High	Unambiguous	MPLDKISQYER	[R].MPLDKISQYER.[T]			0.000273083	5.15092e-05	1.1	1	1	4	162279935	162279935 [459-469]			atp1 gene product (mitochondrion) [Beta vulgaris subsp. vulgaris]	162279935	1	1379.7	11	6.5		18.9	18.7	10.9	61.4	166.5	391.6	149.8	175.5	90436		154342	196333	199172	376108	2263044	5.83632e+06	2.61272e+06	5.23797e+06	195204		564806	557851	326572		1.83365e+06
FALSE		High	Unambiguous	MPKQIHEIKDFLLTAR	[-].MPKQIHEIKDFLLTAR.[R]	1xMet-loss+Acetyl [N-Term]	1xMet-loss+Acetyl [N-Term]	0.00135938	5.15092e-05	0.888	1	1	1	731323124	731323124 [1-16]	731323124 1xMet-loss+Acetyl [N-Term]	731323124 1xMet-loss+Acetyl [N-Term]	PREDICTED: 60S ribosomal protein L38 [Beta vulgaris subsp. vulgaris]	731323124	2	1851.05	16
FALSE		High	Unambiguous	MPKQIHEIKDFLLTAR	[-].MPKQIHEIKDFLLTAR.[R]	1xMet-loss [N-Term]	1xMet-loss [N-Term]	6.06928e-12	5.15092e-05	3.426	1	1	64	731323124	731323124 [1-16]	731323124 1xMet-loss [N-Term]	731323124 1xMet-loss [N-Term]	PREDICTED: 60S ribosomal protein L38 [Beta vulgaris subsp. vulgaris]	731323124	2	1809.04	16	89.4	173.7	49.1	24.1		208.4	153.6	133.2	83.1	85.3	2.41132e+07	3.852e+07	7.80269e+06	4.94163e+06		2.48809e+07	4.07171e+07	3.87271e+07	2.82815e+07	4.96768e+07	5.20477e+07	1.01085e+08	2.85535e+07	1.40409e+07			1.21303e+08
FALSE		High	Unambiguous	MPGQKIETGHSDVVHDVQMDYYGKR	[-].MPGQKIETGHSDVVHDVQMDYYGKR.[I]	1xMet-loss [N-Term]	1xMet-loss [N-Term]	4.99292e-09	5.15092e-05	2.54	1	1	4	731353131	731353131 [1-25]	731353131 1xMet-loss [N-Term]	731353131 1xMet-loss [N-Term]	PREDICTED: protein transport protein SEC13 homolog B [Beta vulgaris subsp. vulgaris]	731353131	2	2759.32	25						14.7	449.4	195.4	157.3	183.2						61567.9	4.16897e+06	1.98809e+06	1.87278e+06	3.73379e+06							300164
FALSE		High	Unambiguous	MPGQKIETGHSDVVHDVQMDYYGK	[-].MPGQKIETGHSDVVHDVQMDYYGK.[R]	1xMet-loss [N-Term]	1xMet-loss [N-Term]	0.00013916	5.15092e-05	1.189	1	1	1	731353131	731353131 [1-24]	731353131 1xMet-loss [N-Term]	731353131 1xMet-loss [N-Term]	PREDICTED: protein transport protein SEC13 homolog B [Beta vulgaris subsp. vulgaris]	731353131	1	2603.22	24								750.1	249.9									748855	291927
FALSE		High	Unambiguous	MPGGQMVVIEEPVR	[-].MPGGQMVVIEEPVR.[L]	1xMet-loss [N-Term]	1xMet-loss [N-Term]	4.19693e-08	5.15092e-05	2.259	1	1	5	731324490	731324490 [1-14]	731324490 1xMet-loss [N-Term]	731324490 1xMet-loss [N-Term]	PREDICTED: pyruvate kinase 2, cytosolic [Beta vulgaris subsp. vulgaris]	731324490	0	1410.74	14			117.2	156.2		74.3	194		195.9	262.4			401733	689553		191063	1107451		1.43547e+06	3291090			1.47012e+06	1.95926e+06			931495
FALSE		High	Unambiguous	MPFVPTKYYKPT	[K].MPFVPTKYYKPT.[-]			7.88434e-05	5.15092e-05	1.264	1	1	6	731336998	731336998 [397-408]			PREDICTED: aminomethyltransferase, mitochondrial [Beta vulgaris subsp. vulgaris]	731336998	1	1471.77	12	22.8	43.3		40.6	22.8	146.8	107.8	95	262.3	258.6	265242	414626		359619	349768	757206	1.23475e+06	1.19322e+06	3.85595e+06	6505983	572517	1.08807e+06		1.0218e+06	573494		3.69163e+06
FALSE		High	Unambiguous	MPLEDNYWESMK	[R].MPLEDNYWESMK.[S]			4.4618e-07	5.15092e-05	1.947	1	1	13	731352776	731352776 [504-515]			PREDICTED: leucine aminopeptidase 1-like [Beta vulgaris subsp. vulgaris]	731352776	0	1542.66	12	67.8	85.2		190.8	116.1	41.7	94.5	144.2	98.3	161.2	1.77853e+06	1.83718e+06		3.80276e+06	4.00999e+06	484679	2.43649e+06	4.077e+06	3.25357e+06	9.12911e+06	3.83891e+06	4.82115e+06		1.0805e+07	6.57495e+06		2.36297e+06
FALSE		High	Unambiguous	MPESTTSIDYVMEK	[-].MPESTTSIDYVMEK.[A]	1xMet-loss [N-Term]	1xMet-loss [N-Term]	5.0368e-07	5.15092e-05	1.931	1	2	2	731318847	731318847 [1-14]	731318847 1xMet-loss [N-Term]	731318847 1xMet-loss [N-Term]	PREDICTED: uridine kinase-like protein 1, chloroplastic isoform X1 [Beta vulgaris subsp. vulgaris]	731318847; 1108884337	0	1499.69	14	32.2	9.9	25		25.1	150.4	236.7	251.3		269.4	98057.5	24900.8	45023.9		100641	202917	709120	825400		1.77229e+06	211655	65345	164762		165015		989289
FALSE		High	Unambiguous	MPDIQALVNDFVNKLR	[-].MPDIQALVNDFVNKLR.[K]	1xMet-loss [N-Term]	1xMet-loss [N-Term]	4.5246e-09	5.15092e-05	2.553	1	1	4	731375845	731375845 [1-16]	731375845 1xMet-loss [N-Term]	731375845 1xMet-loss [N-Term]	PREDICTED: translation initiation factor eIF-2B subunit beta [Beta vulgaris subsp. vulgaris]	731375845	1	1741.96	16	21	21.2	244.9		97.2	320.7	107.9	22.1	86.8	78.2	130193	108227	896841		794364	881633	658257	147943	680092	1.04806e+06	281018	284010	3.28193e+06		1.30247e+06		4.29825e+06
FALSE		High	Unambiguous	MPAVYGDRMTTFEDSEKESEYGYIR	[-].MPAVYGDRMTTFEDSEKESEYGYIR.[K]	1xMet-loss [N-Term]	1xMet-loss [N-Term]	4.99292e-09	5.15092e-05	2.54	1	1	6	733214846	733214846 [1-25]	733214846 1xMet-loss [N-Term]	733214846 1xMet-loss [N-Term]	V-type proton ATPase catalytic subunit A [Beta vulgaris subsp. vulgaris]	733214846	2	2843.28	25					4	113.7	332.3	237.1	72	240.9					215045	2.05914e+06	1.33562e+07	10449896	3714947	21263050					352596		1.0039e+07
FALSE		High	Unambiguous	MPAPDILGDR	[-].MPAPDILGDR.[Q]	1xMet-loss [N-Term]	1xMet-loss [N-Term]	0.000974423	5.15092e-05	0.932	1	1	4	731342049	731342049 [1-10]	731342049 1xMet-loss [N-Term]	731342049 1xMet-loss [N-Term]	PREDICTED: T-complex protein 1 subunit alpha [Beta vulgaris subsp. vulgaris]	731342049	0	953.505	10	24.5	20.3	412.9	163.6		58	2.7	20.2	139.3	158.4	287106	195733	2851103	1.45505e+06		300803	31240.3	254554	2.05732e+06	4.00391e+06	619711	513645	1.04334e+07	4.13432e+06			1.46651e+06
FALSE		High	Unambiguous	MPADQTVISLRPGGGGGNRGSR	[-].MPADQTVISLRPGGGGGNRGSR.[F]	1xMet-loss [N-Term]	1xMet-loss [N-Term]	2.01619e-05	5.15092e-05	1.444	1	1	4	731352582	731352582 [1-22]	731352582 1xMet-loss [N-Term]	731352582 1xMet-loss [N-Term]	PREDICTED: eukaryotic translation initiation factor [Beta vulgaris subsp. vulgaris]	731352582	1	2052.07	22						214.7	228.4	295.4	119	142.5						996575	2.3531e+06	3.33698e+06	1.57356e+06	3.2235e+06							4.85863e+06
FALSE		High	Unambiguous	MPADQTVISLRPGGGGGNR	[-].MPADQTVISLRPGGGGGNR.[G]	1xMet-loss [N-Term]	1xMet-loss [N-Term]	0.000120505	5.15092e-05	1.208	1	1	6	731352582	731352582 [1-19]	731352582 1xMet-loss [N-Term]	731352582 1xMet-loss [N-Term]	PREDICTED: eukaryotic translation initiation factor [Beta vulgaris subsp. vulgaris]	731352582	0	1751.91	19	56.6	17.5		43.4		225.1	161.6	134.1	211.5	150.2	839281	213649		488624		1.47821e+06	2.35626e+06	2143546	3.95678e+06	4.81037e+06	1.81157e+06	560660		1.38835e+06			7.20676e+06
FALSE		High	Unambiguous	MNYILGAFKPACHISITFADEK	[-].MNYILGAFKPACHISITFADEK.[N]	1xAcetyl [N-Term]; 1xCarbamidomethyl [C12]	1xAcetyl [N-Term]; 1xCarbamidomethyl [C12]	2.20681e-06	5.15092e-05	1.736	1	1	1	1108935577	1108935577 [1-22]	1108935577 1xAcetyl [N-Term]	1108935577 1xAcetyl [N-Term]	PREDICTED: vacuolar protein sorting-associated protein 26A [Beta vulgaris subsp. vulgaris]	1108935577	0	2568.26	22	1000										2.1849e+06										4.71606e+06
FALSE		High	Unambiguous	MNWIGFAVSHHLNSNALK	[R].MNWIGFAVSHHLNSNALK.[A]			5.60673e-05	5.15092e-05	1.309	1	1	1	731359415	731359415 [146-163]			PREDICTED: N-alpha-acetyltransferase 15, NatA auxiliary subunit [Beta vulgaris subsp. vulgaris]	731359415	0	2039.03	18	791.8	208.2									1.68591e+06	364717									3.639e+06	957096
FALSE		High	Unambiguous	MPEAQIGVCYGK	[-].MPEAQIGVCYGK.[L]	1xCarbamidomethyl [C9]; 1xMet-loss [N-Term]	1xCarbamidomethyl [C9]; 1xMet-loss [N-Term]	2.90043e-05	5.15092e-05	1.396	1	1	3	731325801	731325801 [1-12]	731325801 1xMet-loss [N-Term]	731325801 1xMet-loss [N-Term]	PREDICTED: glucan endo-1,3-beta-glucosidase isoform X2 [Beta vulgaris subsp. vulgaris]	731325801	0	1221.59	12		14.5	165.1	219	40.5	185.6	231.7	46.5	66.5	30.6		62264.5	507986	868006	278310	428586	1.18749e+06	261558	437190	344640		163395	1.85894e+06	2.46631e+06	456328		2.0895e+06
FALSE		High	Unambiguous	MPLEDNYWESMKSGVADMVNTGGR	[R].MPLEDNYWESMKSGVADMVNTGGR.[Q]			1.14757e-10	5.15092e-05	3.038	1	1	3	731352776	731352776 [504-527]			PREDICTED: leucine aminopeptidase 1-like [Beta vulgaris subsp. vulgaris]	731352776	1	2687.19	24	7		8				170.6	237.7	343.1	233.5	66392.1		44888.7				1.5874e+06	2.4267e+06	4.09868e+06	4.7739e+06	143306		164267
FALSE		High	Unambiguous	MPIIGLGVWR	[K].MPIIGLGVWR.[M]			0.000105144	5.15092e-05	1.226	1	1	10	731376960	731376960 [11-20]			PREDICTED: NADP-dependent D-sorbitol-6-phosphate dehydrogenase [Beta vulgaris subsp. vulgaris]	731376960	0	1141.66	10	172.9	38.6	22	240.9	49.4	37.4	89.3	135.8	93.9	119.7	6.89676e+06	1.26753e+06	516953	7.30106e+06	2.59439e+06	661185	3.50186e+06	5.83845e+06	4.72624e+06	1.03105e+07	1.48865e+07	3.32627e+06	1.89176e+06	2.07449e+07	4.25388e+06		3.2235e+06
FALSE		High	Unambiguous	MPINLIDADGLPR	[-].MPINLIDADGLPR.[I]	1xMet-loss [N-Term]	1xMet-loss [N-Term]	5.08087e-05	5.15092e-05	1.322	1	1	3	731341343	731341343 [1-13]	731341343 1xMet-loss [N-Term]	731341343 1xMet-loss [N-Term]	PREDICTED: putative glucose-6-phosphate 1-epimerase [Beta vulgaris subsp. vulgaris]	731341343	0	1293.72	13	3.3	2	11.7		45.8	81.6	178.4	170.7	192	314.6	30359	15201.4	64064.5		558912	335257	1.62602e+06	1.70613e+06	2.24626e+06	6.29804e+06	65529.3	39891.8	234440		916416		1.63449e+06
FALSE		High	Unambiguous	MQELSDSLDYIIDTIPVFHPLEPYLPLLTLNGK	[K].MQELSDSLDYIIDTIPVFHPLEPYLPLLTLNGK.[L]			0.000436739	5.15092e-05	1.038	1	1	2	731360180	731360180 [238-270]			PREDICTED: probable cinnamyl alcohol dehydrogenase 1 [Beta vulgaris subsp. vulgaris]	731360180	0	3784.98	33				117.3	363.4		75	90.2	354					602477	3.23358e+06		497839	657213	3.01801e+06					1.71185e+06	5.30192e+06
FALSE		High	Unambiguous	MQAGATVTLR	[K].MQAGATVTLR.[N]			0.000869845	5.15092e-05	0.947	1	1	2	731342761	731342761 [78-87]			PREDICTED: uncharacterized protein At4g28440 [Beta vulgaris subsp. vulgaris]	731342761	0	1047.56	10	2.4	1.2	5.9	12.8	14.9	92.2	96.8	264.3	181.5	328	75817.9	29977	109929	306786	616348	1.28275e+06	2991208	8951901	7195003	2.22496e+07	163651	78666.1	402280	871688	1.01059e+06		6.25383e+06
FALSE		High	Unambiguous	MQADATLPLAQR	[R].MQADATLPLAQR.[R]			3.24766e-06	5.15092e-05	1.685	1	2	10	731364147	731364147 [134-145]			PREDICTED: mitochondrial dicarboxylate/tricarboxylate transporter DTC [Beta vulgaris subsp. vulgaris]	731364147; 731325348	0	1314.68	12	29.2		122.6	203.4	28.4	38.8	121.9	186.9	116.4	152.3	787749		1.95082e+06	4.16913e+06	1.0102e+06	463116	3.23352e+06	5.43672e+06	3.9631e+06	8.87137e+06	1.70034e+06		7.13891e+06	1.1846e+07	1.65637e+06		2.25784e+06
FALSE		High	Unambiguous	MPWLAIPLSDNATIK	[K].MPWLAIPLSDNATIK.[S]			9.81075e-07	5.15092e-05	1.843	1	1	6	731342734	731342734 [98-112]			PREDICTED: probable nucleoredoxin 1 [Beta vulgaris subsp. vulgaris]	731342734	0	1669.9	15	173.2	232.4	140.8	83.6	292.6	21.6	4.1	24.5	7.2	19.9	8321596	9.18341e+06	3.99075e+06	3.05067e+06	1.85032e+07	459980	192499	1.26759e+06	434300	2.0683e+06	1.7962e+07	2.40992e+07	1.46039e+07	8.66802e+06	3.03387e+07		2.24256e+06
FALSE		High	Unambiguous	MPVTLLEYSLSAVTEGIDALATTR	[K].MPVTLLEYSLSAVTEGIDALATTR.[V]			1.38362e-14	5.15092e-05	4.229	2	2	15	731323488; 731323486	731323488 [529-552]; 731323486 [536-559]			PREDICTED: 2-isopropylmalate synthase A isoform X2 [Beta vulgaris subsp. vulgaris] PREDICTED: 2-isopropylmalate synthase A isoform X1 [Beta vulgaris subsp. vulgaris]	731323488; 731323486	0	2551.33	24	47.5	378.2	159.4	250	30.8	10.9	37	23.9	37.8	24.4	5.75463e+06	3.77017e+07	1.13919e+07	2.3019e+07	4.90759e+06	584279	4.41035e+06	3.12387e+06	5.78017e+06	6.39543e+06	1.24212e+07	9.89372e+07	4.16878e+07	6.54052e+07	8.04669e+06		2.84855e+06
FALSE		High	Unambiguous	MPVLDEATYSGR	[R].MPVLDEATYSGR.[R]			0.000464015	5.15092e-05	1.03	1	1	1	731342829	731342829 [590-601]			PREDICTED: AP-1 complex subunit gamma-2 [Beta vulgaris subsp. vulgaris]	731342829	0	1338.64	12					234.5	85		345.4		335.1					527432	64328.4		636045		1.23571e+06					864800		313622
FALSE		High	Unambiguous	MPTSEIQEVLPPFLSSNSDPPALFDGTTR	[-].MPTSEIQEVLPPFLSSNSDPPALFDGTTR.[L]	1xMet-loss [N-Term]	1xMet-loss [N-Term]	1.60536e-06	5.15092e-05	1.778	1	1	4	731349336	731349336 [1-29]	731349336 1xMet-loss [N-Term]	731349336 1xMet-loss [N-Term]	PREDICTED: protein IN2-1 homolog B [Beta vulgaris subsp. vulgaris]	731349336	0	3015.49	29				44.7		171.9	83.7	325.5	118.5	255.7				358814		803493	868726	3.70302e+06	1.57751e+06	5826789				1.01952e+06			3.91729e+06
FALSE		High	Unambiguous	MPSTNLLLEEPIRMASILEPSKSTFFPAMTK	[-].MPSTNLLLEEPIRMASILEPSKSTFFPAMTK.[I]	1xMet-loss [N-Term]	1xMet-loss [N-Term]	2.09037e-08	5.15092e-05	2.351	1	2	4	731345443	731345443 [1-31]	731345443 1xMet-loss [N-Term]	731345443 1xMet-loss [N-Term]	PREDICTED: pyruvate kinase 1, cytosolic isoform X2 [Beta vulgaris subsp. vulgaris]	731345443; 1108951830	2	3348.76	31								69.4		930.6								366192		9.82732e+06
FALSE		High	Unambiguous	MPSTNLLLEEPIRMASILEPSK	[-].MPSTNLLLEEPIRMASILEPSK.[S]	1xMet-loss [N-Term]	1xMet-loss [N-Term]	0.000395791	5.15092e-05	1.051	1	2	1	731345443	731345443 [1-22]	731345443 1xMet-loss [N-Term]	731345443 1xMet-loss [N-Term]	PREDICTED: pyruvate kinase 1, cytosolic isoform X2 [Beta vulgaris subsp. vulgaris]	731345443; 1108951830	1	2338.27	22						483.4				516.6						247679				1.29026e+06							1.20752e+06
FALSE		High	Unambiguous	MPSTNLLLEEPIR	[-].MPSTNLLLEEPIR.[M]	1xMet-loss [N-Term]	1xMet-loss [N-Term]	7.52118e-08	5.15092e-05	2.182	1	2	37	731345443	731345443 [1-13]	731345443 1xMet-loss [N-Term]	731345443 1xMet-loss [N-Term]	PREDICTED: pyruvate kinase 1, cytosolic isoform X2 [Beta vulgaris subsp. vulgaris]	731345443; 1108951830	0	1381.77	13	56.3	64.6	46	122.2	114.2	90.2	120.3	166.9	79.4	140	1.31117e+07	1.23686e+07	6.31931e+06	2.16253e+07	3.50226e+07	9.29718e+06	2.75338e+07	4.18873e+07	2.33331e+07	7.03829e+07	2.83013e+07	3.24578e+07	2.31251e+07	6.14449e+07	5.74246e+07		4.53268e+07
FALSE		High	Unambiguous	MPSFSPAQEALFLIHDR	[R].MPSFSPAQEALFLIHDR.[I]			7.02131e-09	5.15092e-05	2.495	1	2	1	731321552	731321552 [150-166]			PREDICTED: KH domain-containing protein At4g18375 isoform X1 [Beta vulgaris subsp. vulgaris]	731321554; 731321552	0	1958.98	17			29			483.2			48.3	439.5			61134			765791			218205	3.39613e+06			223716				3.73348e+06
FALSE		High	Unambiguous	MPSAEFAR	[R].MPSAEFAR.[I]			0.000667382	5.15092e-05	0.982	1	1	6	731348738	731348738 [139-146]			PREDICTED: proliferating cell nuclear antigen [Beta vulgaris subsp. vulgaris]	731348738	0	908.429	8	3.4		73.1	45.9	5.3	117	182.7	230.6	149.8	192.2	93144.5		1.16919e+06	946946	189232	1.40513e+06	4.87173e+06	6.7445e+06	5125451	11254431	201050		4.27858e+06	2.69061e+06	310273		6.85048e+06
FALSE		High	Unambiguous	MPRDDEVADWGGQEWELYLENLPK	[R].MPRDDEVADWGGQEWELYLENLPK.[S]			0.0011082	5.15092e-05	0.915	1	1	1	731362823	731362823 [485-508]			PREDICTED: leukotriene A-4 hydrolase homolog [Beta vulgaris subsp. vulgaris]	731362823	1	2890.34	24							245.1	379.3	375.5								521538	885203	1.02552e+06
FALSE		High	Unambiguous	MPQVVAPTPTPR	[R].MPQVVAPTPTPR.[G]			0.000209489	5.15092e-05	1.135	1	2	4	731316229	731316229 [972-983]			PREDICTED: protein transport protein SEC31 homolog B isoform X2 [Beta vulgaris subsp. vulgaris]	731316229; 1108879431	0	1293.7	12	31.7		103.7	123.1	22.3	7.5	271.6	127.7	192.6	119.8	287893		556130	850757	267336	30287.7	2.42725e+06	1.25202e+06	2.20907e+06	2.35094e+06	621410		2.03512e+06	2.4173e+06	438335		147662
FALSE		High	Unambiguous	MPNIIWWK	[K].MPNIIWWK.[T]			0.00206048	5.15092e-05	0.833	1	1	5	731343046	731343046 [70-77]			PREDICTED: haloacid dehalogenase-like hydrolase domain-containing protein 3 [Beta vulgaris subsp. vulgaris]	731343046	0	1087.58	8	285	39.3	14.4	164.1	1.8	7.1	176.8	19.4	150.6	141.4	2.8948e+06	328682	86538.9	1.26623e+06	24511.6	32067.3	1.76461e+06	211856	1.92933e+06	3099237	6.24836e+06	862533	316684	3.59781e+06	40190.2		156339
FALSE		High	Unambiguous	MPISSDLSNPR	[R].MPISSDLSNPR.[N]			4.67203e-06	5.15092e-05	1.637	1	1	10	731331272	731331272 [169-179]			PREDICTED: bifunctional dTDP-4-dehydrorhamnose 3,5-epimerase/dTDP-4-dehydrorhamnose reductase [Beta vulgaris subsp. vulgaris]	731331272	0	1216.6	11	26.7	0.6	85.7	104.5	53.1	114.3	200.8	148.1	218.7	47.4	503761	9784.25	953848	1.49799e+06	1.32054e+06	955279	3.72519e+06	3.01231e+06	5.20602e+06	1.93312e+06	1.08736e+06	25676	3.49055e+06	4.25633e+06	2.16521e+06		4.6573e+06
FALSE		High	Unambiguous	MPISSDLNNPR	[R].MPISSDLNNPR.[N]			1.94013e-06	5.15092e-05	1.753	2	3	8	731328823; 731322066	731328823 [541-551]; 731322066 [542-552]			PREDICTED: trifunctional UDP-glucose 4,6-dehydratase/UDP-4-keto-6-deoxy-D-glucose 3,5-epimerase/UDP-4-keto-L-rhamnose-reductase RHM1 [Beta vulgaris subsp. vulgaris] PREDICTED: trifunctional UDP-glucose 4,6-dehydratase/UDP-4-keto-6-deoxy-D-glucose 3,5-epimerase/UDP-4-keto-L-rhamnose-reductase RHM1 [Beta vulgaris subsp. vulgaris]	731328827; 731328823; 731322066	0	1243.61	11	19.8	12.5	98.5	77.2	10.2	19.7	167.4	203.7	222.8	168.3	407252	211573	1.19503e+06	1.20618e+06	276290	179126	3.38405e+06	4.51792e+06	5.78291e+06	7.47645e+06	879043	555213	4.37315e+06	3.42718e+06	453017		873296
FALSE		High	Unambiguous	MNVHPDVNFEELAR	[K].MNVHPDVNFEELAR.[S]			1.71963e-05	5.15092e-05	1.465	2	2	5	731326512; 731336289	731326512 [355-368]; 731336289 [355-368]			PREDICTED: 26S protease regulatory subunit 6A homolog [Beta vulgaris subsp. vulgaris] PREDICTED: 26S protease regulatory subunit 6A homolog [Beta vulgaris subsp. vulgaris]	731326512; 731336289	0	1670.8	14	2.8		6	76.6		49.3	199.6	172	122.9	370.7	21905.2		27335.3	449386		168591	1.51486e+06	1.43137e+06	1.19717e+06	6.17748e+06	47281.7		100032	1.27686e+06			821936
FALSE		High	Unambiguous	MLSSLDYR	[R].MLSSLDYR.[Q]			0.000850315	5.15092e-05	0.95	1	1	6	731329313	731329313 [361-368]			PREDICTED: proton pump-interactor 1-like [Beta vulgaris subsp. vulgaris]	731329313	0	984.482	8	23.6		22.1	30.4	16.7	244.3	0.4	234.1	172.6	255.8	436916		240970	427201	406125	2.00042e+06	6924.86	4.66441e+06	4025161	1.02101e+07	943073		881815	1.21383e+06	665900		9.75271e+06
FALSE		High	Unambiguous	MTDPEIFEQRYPVILHK	[R].MTDPEIFEQRYPVILHK.[F]			0.000788326	5.15092e-05	0.96	1	1	2	731347505	731347505 [1155-1171]			PREDICTED: 5-oxoprolinase [Beta vulgaris subsp. vulgaris]	731347505	1	2116.09	17	18.4				59.9	76.6	284.7	218.8	125.4	216.3	95231.7				407792	175287	1.44659e+06	1.21949e+06	817574	2.41419e+06	205555				668633		854580
FALSE		High	Unambiguous	MTENFVKEDFR	[K].MTENFVKEDFR.[Q]			2.68728e-06	5.15092e-05	1.71	1	1	10	731325021	731325021 [220-230]			PREDICTED: probable aldo-keto reductase 2 [Beta vulgaris subsp. vulgaris]	731325021	1	1415.66	11	6.8	87.1	5.7	191.2	72.2	121.1	40.8	111.3	120.4	243.4	165321	1.73473e+06	81851.5	3.51766e+06	2.30076e+06	1.29802e+06	971956	2.90493e+06	3.67662e+06	1.27219e+07	356842	4.55231e+06	299531	9.9949e+06	3.77243e+06		6.32827e+06
FALSE		High	Unambiguous	NAPSIIFIDEIDSIAPKR	[K].NAPSIIFIDEIDSIAPKR.[E]			1.5349e-05	5.15092e-05	1.48	2	3	4	731351877; 731345718	731351877 [299-316]; 731345718 [299-316]			PREDICTED: cell division cycle protein 48 homolog [Beta vulgaris subsp. vulgaris] PREDICTED: cell division cycle protein 48 homolog [Beta vulgaris subsp. vulgaris]	731351877; 731351875; 731345718	1	1999.09	18				14.4	328.5	120.7	142.8	6.8	286.6	100.2				156255	6.17558e+06	763257	2.0039e+06	104263	5.16183e+06	3.087e+06				443977	1.01257e+07		3.72113e+06
FALSE		High	Unambiguous	NAPSIIFIDEIDSIAPK	[K].NAPSIIFIDEIDSIAPK.[R]			4.25851e-09	5.15092e-05	2.561	2	3	26	731351877; 731345718	731351877 [299-315]; 731345718 [299-315]			PREDICTED: cell division cycle protein 48 homolog [Beta vulgaris subsp. vulgaris] PREDICTED: cell division cycle protein 48 homolog [Beta vulgaris subsp. vulgaris]	731351877; 731351875; 731345718	0	1842.98	17	167.7	119.7	146.7	211.3	265.1	30.4	9.6	16.8	16.4	16.3	2.01716e+07	11842677	1.04032e+07	1.93032e+07	4.1969e+07	1.61879e+06	1.1365e+06	2.17148e+06	2.48047e+06	4.23664e+06	4.35398e+07	3.10777e+07	3.807e+07	5.48472e+07	6.88142e+07		7.89214e+06
FALSE		High	Unambiguous	NAPSFVFIDEIDALAGR	[R].NAPSFVFIDEIDALAGR.[H]			0.00158139	5.15092e-05	0.868	1	1	1	731363231	731363231 [560-576]			PREDICTED: ATP-dependent zinc metalloprotease FTSH 12, chloroplastic [Beta vulgaris subsp. vulgaris]	731363231	0	1834.93	17		229.3		90.2		595.3				85.2		507856		184526		709765				495187		1.33272e+06		524303			3.46034e+06
FALSE		High	Unambiguous	NANQEVLYLSAK	[K].NANQEVLYLSAK.[I]			0.000253163	5.15092e-05	1.11	1	1	2	731331043	731331043 [841-852]			PREDICTED: beta-adaptin-like protein C [Beta vulgaris subsp. vulgaris]	731331043	0	1349.71	12	66.3	86.5	255.1	393.4	9.9	24.4		33.8	9.4	121.1	962485	1.03314e+06	2.18448e+06	4.33997e+06	189800	157168		529140	171964	3.79662e+06	2.0775e+06	2.71117e+06	7.99397e+06	1.23314e+07	311204		766247
FALSE		High	Unambiguous	NAMDNIKNAIDQLKLPVSI	[R].NAMDNIKNAIDQLKLPVSI.[-]			1.01895e-06	5.15092e-05	1.838	1	1	6	731367509	731367509 [456-474]			PREDICTED: bifunctional aspartate aminotransferase and glutamate/aspartate-prephenate aminotransferase [Beta vulgaris subsp. vulgaris]	731367509	2	2097.14	19	16.7	405	46.2	8.4	4.7	100	122.2	33.2	249.5	14.2	598745	1.19285e+07	976010	228385	221021	1.58475e+06	4.29971e+06	1.28186e+06	1.12699e+07	1.09524e+06	1.29238e+06	3.13029e+07	3.57165e+06	648923	362396		7.72616e+06
FALSE		High	Unambiguous	NALYQATIKQGDFLLNR	[K].NALYQATIKQGDFLLNR.[I]			2.02916e-07	5.15092e-05	2.051	1	1	3	731368509	731368509 [360-376]			PREDICTED: 26S proteasome non-ATPase regulatory subunit 6 homolog [Beta vulgaris subsp. vulgaris]	731368509	1	1965.06	17						172.9	29.5	318.4	114	365.2						462629	175463	2.07373e+06	869005	4764646							2.25547e+06
FALSE		High	Unambiguous	NALPAADTNVDDAVSHR	[R].NALPAADTNVDDAVSHR.[T]			3.86588e-06	5.15092e-05	1.662	1	1	1	731335609	731335609 [867-883]			PREDICTED: protein MODIFIER OF SNC1 1 [Beta vulgaris subsp. vulgaris]	731335609	0	1765.85	17	29.6	24.4	76		31.6		153.2	257.4	213.3	214.6	97733.8	66324.9	148279		137427		497900	917294	889416	1.53145e+06	210956	174051	542617		225332
FALSE		High	Unambiguous	NAREDIKELLK	[K].NAREDIKELLK.[T]			1.84097e-05	5.15092e-05	1.456	1	2	3	731312443	731312443 [86-96]			PREDICTED: probable L-ascorbate peroxidase 6, chloroplastic isoform X1 [Beta vulgaris subsp. vulgaris]	731312443; 731312445	2	1328.75	11	2.3	172.7	10.2	23.9		24.5	74.4	279.9	268.8	143.3	39575.4	2.42696e+06	102602	309805		185317	1.24986e+06	5.15393e+06	5.79126e+06	5.28585e+06	85422.5	6.36886e+06	375464	880264			903480
FALSE		High	Unambiguous	NAINSLAKPYER	[R].NAINSLAKPYER.[S]			1.59231e-07	5.15092e-05	2.083	1	1	9	731322733	731322733 [43-54]			PREDICTED: uncharacterized protein LOC104888716 [Beta vulgaris subsp. vulgaris]	731322733	0	1375.73	12	7.1	68.2		78.4	43.3	234.1	153.4	151.8	112.1	151.5	159488	1.25236e+06		1.32785e+06	1.27054e+06	2.31232e+06	3.36304e+06	3.65028e+06	3.155e+06	7.29647e+06	344251	3.28645e+06		3.7729e+06	2.08324e+06		1.12733e+07
FALSE		High	Unambiguous	NAILNLVGATAR	[K].NAILNLVGATAR.[Y]			0.00114226	5.15092e-05	0.911	1	1	2	731361240	731361240 [200-211]			PREDICTED: transducin beta-like protein 2 [Beta vulgaris subsp. vulgaris]	731361240	0	1212.71	12							291.2		264	444.8							621078		722759	2.0843e+06
FALSE		High	Unambiguous	NAIINAAELASYDQVKQSILR	[R].NAIINAAELASYDQVKQSILR.[I]			3.95243e-07	5.15092e-05	1.963	1	1	1	731334500	731334500 [186-206]			PREDICTED: mitochondrial uncoupling protein 1 [Beta vulgaris subsp. vulgaris]	731334500	1	2317.25	21								368.8		631.2								573298		1.9654e+06
FALSE		High	Unambiguous	NAIINAAELASYDQVK	[R].NAIINAAELASYDQVK.[LQ]			1.56836e-07	5.15092e-05	2.085	1	3	6	731334500	731334500 [186-201]			PREDICTED: mitochondrial uncoupling protein 1 [Beta vulgaris subsp. vulgaris]	731348736; 731348734; 731334500	0	1719.89	16	20	68.5	54.9	80	58.7	66	117.6	185.3	115.1	233.8	311857	877849	504346	946605	1.20325e+06	455333	1.80066e+06	3.11021e+06	2.26211e+06	7.86094e+06	673136	2.30366e+06	1.84562e+06	2.68964e+06	1.9729e+06		2.2199e+06
FALSE		High	Unambiguous	NAILDSLHDMSGSALR	[K].NAILDSLHDMSGSALR.[C]			9.66321e-07	5.15092e-05	1.845	1	1	4	731349151	731349151 [565-580]			PREDICTED: calcium-transporting ATPase 4, endoplasmic reticulum-type [Beta vulgaris subsp. vulgaris]	731349151	0	1699.84	16	2		6.5	655.9		65.7	74.3	37	28.9	129.7	44873.3		85592.3	1.10841e+07		646814	1.62356e+06	886934	809937	6.22779e+06	96858		313220	3.14938e+07			3.15343e+06
FALSE		High	Unambiguous	NALKSGEEEEIYLPDTIDVGNSSQAR	[K].NALKSGEEEEIYLPDTIDVGNSSQAR.[S]			6.92385e-07	5.15092e-05	1.889	1	1	5	731358720	731358720 [175-200]			PREDICTED: ras-related protein Rab7 [Beta vulgaris subsp. vulgaris]	731358720	1	2835.36	26						35.7	303.5	306.9	151	202.8						107361	2.0248e+06	2.24549e+06	1.29314e+06	2.97209e+06							523421
FALSE		High	Unambiguous	NALHDCLESIDETLDELRR	[R].NALHDCLESIDETLDELRR.[T]	1xCarbamidomethyl [C6]	1xCarbamidomethyl [C6]	0.00131886	5.15092e-05	0.892	1	1	1	731347886	731347886 [124-142]			PREDICTED: pectinesterase [Beta vulgaris subsp. vulgaris]	731347886	1	2299.1	19			110.7				817.5		71.8				37817.8				465088		52416.3				138392
FALSE		High	Unambiguous	NALENYAYNMR	[K].NALENYAYNMR.[N]	1xOxidation [M10]	1xOxidation [M10]	2.85682e-05	5.15092e-05	1.398	2	2	22	731349044; 731318762	731349044 [546-556]; 731318762 [546-556]; [1421-1431]			PREDICTED: heat shock cognate 70 kDa protein 2 [Beta vulgaris subsp. vulgaris] PREDICTED: LOW QUALITY PROTEIN: uncharacterized protein LOC104887018 [Beta vulgaris subsp. vulgaris]	731349044; 731318762	0	1374.61	11	8.7	25.8	91.5	219.7	69.9	223.9	58.1	116.1	104.3	82	467949	1.14177e+06	2.90369e+06	8.97397e+06	4.94836e+06	5.33212e+06	3.07251e+06	6.72742e+06	7.07377e+06	9.51482e+06	1.01006e+06	2.99625e+06	1.06259e+07	2.54982e+07	8.11353e+06		2.59959e+07
FALSE		High	Unambiguous	NAILREKDQMGVEDDQVILDQLHATAFQYTPLGR	[R].NAILREKDQMGVEDDQVILDQLHATAFQYTPLGR.[T]			3.04235e-14	5.15092e-05	4.125	1	1	4	731339204	731339204 [202-235]			PREDICTED: probable mitochondrial-processing peptidase subunit beta, mitochondrial [Beta vulgaris subsp. vulgaris]	731339204	2	3884.96	34				33.7		69.9	239.9	305.8	58.9	291.8				257852		311936	2.37607e+06	3.32221e+06	749054	6.34742e+06				732649			1.52079e+06
FALSE		High	Unambiguous	NALENYAYNMR	[K].NALENYAYNMR.[N]			1.00363e-06	5.15092e-05	1.84	2	2	165	731349044; 731318762	731349044 [546-556]; 731318762 [546-556]; [1421-1431]			PREDICTED: heat shock cognate 70 kDa protein 2 [Beta vulgaris subsp. vulgaris] PREDICTED: LOW QUALITY PROTEIN: uncharacterized protein LOC104887018 [Beta vulgaris subsp. vulgaris]	731349044; 731318762	0	1358.62	11	62.6	34.2	84.7	137.3	48.7	100.1	64.8	166.3	117.8	183.4	6.68359e+07	3.00587e+07	5.33279e+07	1.11366e+08	6.84078e+07	4.7328e+07	6.79317e+07	1.91313e+08	1.58638e+08	4.22527e+08	1.44264e+08	7.88804e+07	1.9515e+08	3.16429e+08	1.12164e+08		2.3074e+08
FALSE		High	Unambiguous	NARPYSFSLEEDTTNYGVYQK	[K].NARPYSFSLEEDTTNYGVYQK.[G]			2.95674e-11	5.15092e-05	3.217	1	1	9	731349307	731349307 [297-317]			PREDICTED: ubiquitin-activating enzyme E1 1 [Beta vulgaris subsp. vulgaris]	731349307	0	2482.15	21	94			61.8		79.7	294.5	165.1	77.8	227	2.36473e+06			1.18129e+06		888192	7.28184e+06	4.4772e+06	2.46868e+06	1.23287e+07	5.10422e+06			3.35646e+06			4.33023e+06
FALSE		High	Unambiguous	NASYGALSDHQFMRPR	[R].NASYGALSDHQFMRPR.[A]			1.66636e-07	5.15092e-05	2.077	1	1	20	731323657	731323657 [359-374]			PREDICTED: methylenetetrahydrofolate reductase 1 [Beta vulgaris subsp. vulgaris]	731323657	0	1849.88	16	245.4	44.6	24.7	163.9	171.6	43.7	86.1	83.2	37.2	99.6	2.9884e+07	4.47e+06	1.77189e+06	1.51616e+07	2.75129e+07	2.35665e+06	1.03025e+07	1.09237e+07	5.7179e+06	2.61827e+07	6.45038e+07	1.17302e+07	6.48413e+06	4.30795e+07	4.51114e+07		1.14894e+07
FALSE		High	Unambiguous	NAWAEAFNHLVAAIK	[K].NAWAEAFNHLVAAIK.[A]			1.75506e-09	5.15092e-05	2.678	1	2	16	733214039	733214039 [147-161]			non-symbiotic hemoglobin 1-like [Beta vulgaris subsp. vulgaris]	731358830; 733214039	0	1654.87	15	191.8	207.4	213.2	154	148.7	14.1	6.2	40.4	18	6.2	1.79915e+07	16009084	1.17968e+07	1.09794e+07	1.83647e+07	583685	574810	4.08769e+06	2.13487e+06	1.24995e+06	3.88343e+07	4.20113e+07	4.31697e+07	3.11963e+07	3.01115e+07		2.84566e+06
FALSE		High	Unambiguous	NAVVTVPAYFNDSQR	[K].NAVVTVPAYFNDSQR.[Q]			2.20422e-08	5.15092e-05	2.344	3	7	61	731349044; 731318762; 731310842	731349044 [145-159]; 731318762 [145-159]; [1020-1034]; 731310842 [143-157]			PREDICTED: heat shock cognate 70 kDa protein 2 [Beta vulgaris subsp. vulgaris] PREDICTED: LOW QUALITY PROTEIN: uncharacterized protein LOC104887018 [Beta vulgaris subsp. vulgaris] PREDICTED: heat shock 70 kDa protein-like [Beta vulgaris subsp. vulgaris]	731349044; 731316940; 731312997; 731313037; 731313184; 731318762; 731310842	0	1680.83	15	107.8	36.6	211.1	110.1	114.1	27.4	86.3	94.5	103.3	108.8	3.12009e+07	8.72335e+06	3.60508e+07	2.42129e+07	4.35023e+07	3.50938e+06	2.45582e+07	2.94926e+07	3.77315e+07	6.79994e+07	6.73464e+07	2.28919e+07	1.31926e+08	6.87974e+07	7.13282e+07		1.71094e+07
FALSE		High	Unambiguous	NAVVEGSDLDNITAPVAGAPAVDGLSSPASVVPVSKPK	[R].NAVVEGSDLDNITAPVAGAPAVDGLSSPASVVPVSKPK.[F]			0.000108379	5.15092e-05	1.222	1	1	4	731321884	731321884 [135-172]			PREDICTED: protein SGT1 homolog B [Beta vulgaris subsp. vulgaris]	731321884	0	3628.91	38							249	437.7	168.5	144.8							2.60132e+06	5015908	2.25929e+06	3.32401e+06
FALSE		High	Unambiguous	NAVLTSFASGR	[K].NAVLTSFASGR.[A]			0.000474677	5.15092e-05	1.027	1	1	2	731333913	731333913 [165-175]			PREDICTED: actin-related protein 4 [Beta vulgaris subsp. vulgaris]	731333913	0	1122.59	11			7.8	144.7		36.1	188.2	285.3	153.8	184.1			37314.6	894518		130025	1505391	2.50307e+06	1579315	3.23378e+06			136550	2.54164e+06			633915
FALSE		High	Unambiguous	NAVFGDSSALAPGGVRVGAPAMTSR	[K].NAVFGDSSALAPGGVRVGAPAMTSR.[G]			0.000195684	5.15092e-05	1.144	1	1	1	731325199	731325199 [438-462]			PREDICTED: serine hydroxymethyltransferase 4 [Beta vulgaris subsp. vulgaris]	731325199	1	2388.21	25
FALSE		High	Unambiguous	NAVFGDSSALAPGGVR	[K].NAVFGDSSALAPGGVR.[V]			1.79435e-10	5.15092e-05	2.979	1	1	52	731325199	731325199 [438-453]			PREDICTED: serine hydroxymethyltransferase 4 [Beta vulgaris subsp. vulgaris]	731325199	0	1517.77	16	42.8	10.4	59.7	137.1	21.7	68.3	98.1	234.7	129.2	198.1	1.07552e+07	2.14895e+06	8.85346e+06	2.61854e+07	7.17747e+06	7.60466e+06	2.42517e+07	6.3609e+07	4.09679e+07	1.07521e+08	2.32148e+07	5.6393e+06	3.23987e+07	7.44021e+07	1.17685e+07		3.70752e+07
FALSE		High	Unambiguous	NAVEAYVYDMR	[K].NAVEAYVYDMR.[N]			4.04566e-06	5.15092e-05	1.656	1	1	43	731359455	731359455 [630-640]			PREDICTED: heat shock 70 kDa protein 15 [Beta vulgaris subsp. vulgaris]	731359455	0	1330.61	11	52.3	42.4	30.1	151	97.5	168.6	117.8	110	74.1	156.3	5.68931e+06	3.79202e+06	1.92993e+06	1.24855e+07	1.39757e+07	8.12487e+06	1.26024e+07	1.29015e+07	1.01748e+07	3.67314e+07	1.22802e+07	9.95107e+06	7.06246e+06	3.54756e+07	2.29152e+07		3.96114e+07
FALSE		High	Unambiguous	NASSISEDDKEKLSPFSNLSIDESYQSR	[R].NASSISEDDKEKLSPFSNLSIDESYQSR.[D]			0.000381084	5.15092e-05	1.056	1	1	3	731331270	731331270 [272-299]			PREDICTED: hydroxymethylglutaryl-CoA synthase [Beta vulgaris subsp. vulgaris]	731331270	2	3146.48	28				206				91.2	444.4	258.4				447144				280944	1.60174e+06	1.59379e+06				1.27049e+06
FALSE		High	Unambiguous	NAVDEWPEEAQTHHFYFVK	[K].NAVDEWPEEAQTHHFYFVK.[H]			0.000433444	5.15092e-05	1.039	1	1	10	731329313	731329313 [62-80]			PREDICTED: proton pump-interactor 1-like [Beta vulgaris subsp. vulgaris]	731329313	0	2347.08	19	359.9	169.2	49.8	84.5		13.8	94.7	42.1	117.7	68.2	8.37855e+06	3.23932e+06	684476	1.49515e+06		142692	2.16616e+06	1.05672e+06	3.45724e+06	3.4292e+06	1.80849e+07	8.50067e+06	2.5048e+06	4.24826e+06			695670
FALSE		High	Unambiguous	NATWTLSNFCR	[R].NATWTLSNFCR.[G]	1xCarbamidomethyl [C10]	1xCarbamidomethyl [C10]	2.62839e-05	5.15092e-05	1.409	3	3	39	731320622; 731346765; 731327532	731320622 [221-231]; 731346765 [222-232]; 731327532 [223-233]			PREDICTED: importin subunit alpha-1 [Beta vulgaris subsp. vulgaris] PREDICTED: importin subunit alpha [Beta vulgaris subsp. vulgaris] PREDICTED: importin subunit alpha-4 [Beta vulgaris subsp. vulgaris]	731320622; 731346765; 731327532	0	1369.63	11	19.5	63.3	29.9	120.8	42.2	98.9	120.6	186.9	121.7	196.3	2.32701e+06	6.21539e+06	2.10288e+06	1.09614e+07	6.6362e+06	5.23025e+06	1.41488e+07	2.4053e+07	1.83317e+07	5.06125e+07	5.02279e+06	1.63105e+07	7.69535e+06	3.11452e+07	1.0881e+07		2.54992e+07
FALSE		High	Unambiguous	NATPEMSEDVSNFLR	[K].NATPEMSEDVSNFLR.[L]			1.64226e-06	5.15092e-05	1.775	1	1	7	731313530	731313530 [97-111]			PREDICTED: glucose-6-phosphate 1-dehydrogenase, cytoplasmic [Beta vulgaris subsp. vulgaris]	731313530	0	1709.78	15	39.4	90.8	19.5	81	166	144.4	54	153.9	110.2	140.8	624499	1.18492e+06	182590	975584	3.46746e+06	1.01413e+06	842187	2.63101e+06	2.20408e+06	4.82173e+06	1.34797e+06	3.1095e+06	668175	2.77198e+06	5.68539e+06		4.94424e+06
FALSE		High	Unambiguous	NATNEAVQMSIGRK	[R].NATNEAVQMSIGRK.[W]			2.22099e-08	5.15092e-05	2.343	1	1	9	731320692	731320692 [156-169]			PREDICTED: eukaryotic translation initiation factor [Beta vulgaris subsp. vulgaris]	731320692	1	1518.77	14	0.5					189.3	194.7	246.5	161.5	207.5	17341.8					2.89618e+06	6.61276e+06	9.18124e+06	7.04125e+06	1.54762e+07	37431.9						1.41198e+07
FALSE		High	Unambiguous	NATNEAVQMSIGR	[R].NATNEAVQMSIGR.[K]			3.29532e-07	5.15092e-05	1.987	1	1	10	731320692	731320692 [156-168]			PREDICTED: eukaryotic translation initiation factor [Beta vulgaris subsp. vulgaris]	731320692	0	1390.67	13	9.7	1.3	78.7	124.3	17.1	49	176	178.1	116.8	248.9	228615	26171.9	1.09814e+06	2.23218e+06	532105	513089	4.08955e+06	4.53862e+06	3.48334e+06	1.27048e+07	493460	68680.7	4.01856e+06	6.34241e+06	872461		2.50148e+06
FALSE		High	Unambiguous	NATLTNEKESDAHPIRAMK	[K].NATLTNEKESDAHPIRAMK.[F]			5.95034e-07	5.15092e-05	1.909	1	2	4	731362937	731362937 [464-482]			PREDICTED: elongation factor 2 [Beta vulgaris subsp. vulgaris]	731362937; 733214592	2	2126.07	19		1.6		96.5		171.3	137.9	425.9	76	90.8		18896.7		1.05026e+06		1.08626e+06	1.94138e+06	6.57378e+06	1.37318e+06	2.80655e+06		49588.9		2.98416e+06			5.29589e+06
FALSE		High	Unambiguous	NATLTNEKESDAHPIR	[K].NATLTNEKESDAHPIR.[A]			9.85637e-12	5.15092e-05	3.362	1	2	58	731362937	731362937 [464-479]			PREDICTED: elongation factor 2 [Beta vulgaris subsp. vulgaris]	731362937; 733214592	1	1795.89	16	74.7	101	78.5	95.7	171	240	76.4	58	68.6	36.1	3.49572e+07	3.88484e+07	2.16683e+07	3.40212e+07	1.05278e+08	4.97079e+07	3.51133e+07	2.92169e+07	4.04608e+07	3.64051e+07	7.54543e+07	1.01946e+08	7.92938e+07	9.66662e+07	1.72618e+08		2.42343e+08
FALSE		High	Unambiguous	NATFAAIEEGIVPGGGAALVHLSTFVPSIK	[K].NATFAAIEEGIVPGGGAALVHLSTFVPSIK.[E]			2.12104e-09	5.15092e-05	2.653	1	1	14	731355347	731355347 [444-473]			PREDICTED: ruBisCO large subunit-binding protein subunit alpha [Beta vulgaris subsp. vulgaris]	731355347	0	2966.6	30	33.2	245.6	77	119.3	242.8	88.6	36.4	40.6	106	10.5	2.125e+06	1.29296e+07	2.90639e+06	5.79903e+06	20455710	2.50997e+06	2.29009e+06	2.79962e+06	8.55782e+06	1.4492e+06	4.58676e+06	3.39301e+07	1.06358e+07	1.64771e+07	3.354e+07		1.22369e+07
FALSE		High	Unambiguous	NATYLPEVAAHEGWTKLEAIDSLMR	[R].NATYLPEVAAHEGWTKLEAIDSLMR.[K]			2.29332e-05	5.15092e-05	1.427	1	1	3	731329703	731329703 [133-157]			PREDICTED: uncharacterized protein At2g38710 [Beta vulgaris subsp. vulgaris]	731329703	1	2815.41	25		67.6	103.5			128.6	218.6	277.7	117.5	86.6		220447	242078			225786	852180	1.18686e+06	587847	741010		578500	885870				1.10078e+06
FALSE		High	Unambiguous	NAIDQLKLPVSI	[K].NAIDQLKLPVSI.[-]			2.45515e-05	5.15092e-05	1.418	1	1	7	731367509	731367509 [463-474]			PREDICTED: bifunctional aspartate aminotransferase and glutamate/aspartate-prephenate aminotransferase [Beta vulgaris subsp. vulgaris]	731367509	1	1310.77	12	2.6	45.9	9.6	173.7	268.3	77	83.8	72.5	119.5	147.2	97363.6	1.42715e+06	214311	4.9906e+06	1.33573e+07	1.28918e+06	3115073	2.95577e+06	5.69912e+06	12016245	210157	3.74515e+06	784259	1.41801e+07	2.19012e+07		6.28519e+06
FALSE		High	Unambiguous	NALAAGADKDEEDSEGR	[K].NALAAGADKDEEDSEGR.[T]			2.39298e-10	5.15092e-05	2.941	1	1	1	731350661	731350661 [238-254]			PREDICTED: ankyrin repeat domain-containing protein 2B [Beta vulgaris subsp. vulgaris]	731350661	1	1747.77	17		95.8	582.3	321.9								585538	2.55372e+06	1.81815e+06								1.53658e+06	9.34517e+06	5.16599e+06
FALSE		High	Unambiguous	NAKVVTIDSYEDVPENDEKALMK	[K].NAKVVTIDSYEDVPENDEKALMK.[A]			1.12442e-06	5.15092e-05	1.825	1	1	4	731360267	731360267 [248-270]			PREDICTED: cysteine proteinase RD21A [Beta vulgaris subsp. vulgaris]	731360267	2	2608.28	23	52.1		33.3	143.8	4.1	96.7	98.7	319.8	9.8	241.8	557722		210243	1.17037e+06	57773	458784	1.03847e+06	3.69138e+06	132227	5.58954e+06	1.20383e+06		769371	3.32544e+06	94727.1		2.23672e+06
FALSE		High	Unambiguous	NADEFEYTDPVDGSVSK	[R].NADEFEYTDPVDGSVSK.[H]			1.0985e-07	5.15092e-05	2.132	1	1	13	731341465	731341465 [491-507]			PREDICTED: phosphoglucomutase, cytoplasmic [Beta vulgaris subsp. vulgaris]	731341465	0	1872.81	17	27.7		149.2	185.8	41.3	75.4	86.4	176.9	104.1	153.2	698704		2.21636e+06	3555371	1.37049e+06	840793	2.13798e+06	4.80271e+06	3.3074e+06	8.33201e+06	1.50813e+06		8.11062e+06	1.01021e+07	2.24711e+06		4.09914e+06
FALSE		High	Unambiguous	NADEEEGGEIVFGGVDPDHYKGEHTWAPVSQK	[R].NADEEEGGEIVFGGVDPDHYKGEHTWAPVSQK.[G]			0.00188179	5.15092e-05	0.845	1	1	3	731376286	731376286 [234-265]			PREDICTED: aspartic proteinase A1 [Beta vulgaris subsp. vulgaris]	731376286	1	3497.59	32						109.5	263.2	133.7	131.8	361.8						237056	1.26488e+06	704919	812700	3.81971e+06							1.15573e+06
FALSE		High	Unambiguous	NADEEEGGEIVFGGVDPDHYK	[R].NADEEEGGEIVFGGVDPDHYK.[G]			1.7996e-05	5.15092e-05	1.459	1	1	2	731376286	731376286 [234-254]			PREDICTED: aspartic proteinase A1 [Beta vulgaris subsp. vulgaris]	731376286	0	2276.99	21		735.1	76.5	31.8						156.7		2.55852e+06	190864	102072						1.43088e+06		6.71412e+06	698454	290024
FALSE		High	Unambiguous	NAASDAYTQVFAPHHGWAIR	[K].NAASDAYTQVFAPHHGWAIR.[K]			0.000595734	5.15092e-05	0.997	1	1	1	731350718	731350718 [127-146]			PREDICTED: accelerated cell death 11 [Beta vulgaris subsp. vulgaris]	731350718	0	2212.07	20	1000										1.69379e+06										3.65601e+06
FALSE		High	Unambiguous	NAANYTPLTPLWFLER	[K].NAANYTPLTPLWFLER.[A]			2.37911e-07	5.15092e-05	2.03	1	1	13	731322024	731322024 [10-25]			PREDICTED: acetate/butyrate--CoA ligase AAE7, peroxisomal [Beta vulgaris subsp. vulgaris]	731322024	0	1905.99	16	221.7	170.6	46.6	93.6	211.6	108.7	42.6	17	43.8	43.8	18595884	1.1766e+07	2306331	5.96339e+06	2.33623e+07	4.03637e+06	3.50755e+06	1.53285e+06	4.63344e+06	7.92613e+06	4.01388e+07	3.08765e+07	8.43988e+06	1.69441e+07	3.83059e+07		1.96787e+07
FALSE		High	Unambiguous	NAANESAQLSIGK	[K].NAANESAQLSIGK.[Q]			1.1323e-07	5.15092e-05	2.128	1	1	4	731370177	731370177 [188-200]			PREDICTED: eukaryotic translation initiation factor 4E-1 [Beta vulgaris subsp. vulgaris]	731370177	0	1302.66	13	16.9		67.1	63.2		68.2	185.3	307.5	90.5	201.4	443290		1.03847e+06	1.26056e+06		792722	4781836	8701064	2.99542e+06	11410601	956831		3.80023e+06	3.58169e+06			3.86478e+06
FALSE		High	Unambiguous	NAALLSEVLR	[R].NAALLSEVLR.[V]			0.000209489	5.15092e-05	1.135	1	1	2	731324765	731324765 [261-270]			PREDICTED: zeatin O-glucosyltransferase-like [Beta vulgaris subsp. vulgaris]	731324765	0	1085.63	10				406.7		47.7		99.8		445.8				618218		42231.4		215291		1.92576e+06				1.75658e+06			205892
FALSE		High	Unambiguous	NADEFEYTDPVDGSVSKHQGIR	[R].NADEFEYTDPVDGSVSKHQGIR.[Y]			7.91686e-11	5.15092e-05	3.087	1	1	8	731341465	731341465 [491-512]			PREDICTED: phosphoglucomutase, cytoplasmic [Beta vulgaris subsp. vulgaris]	731341465	1	2464.14	22		4.5	7.8			41.3	157.8	245.2	111.4	431.9		106201	131189			520696	4.41428e+06	7.52162e+06	4.00062e+06	2.65379e+07		278694	480077				2.53857e+06
FALSE		High	Unambiguous	NAAIANNYFVGSINR	[R].NAAIANNYFVGSINR.[V]			9.29309e-09	5.15092e-05	2.458	1	1	8	731359652	731359652 [296-310]			PREDICTED: beta-ureidopropionase [Beta vulgaris subsp. vulgaris]	731359652	0	1623.82	15	18.5		77.3	51.8	14.2	114.5	173.5	145.8	218.8	185.5	301743		744738	643720	305832	828797	2.78687e+06	2.56893e+06	4.5096e+06	6.54461e+06	651304		2.72532e+06	1.82903e+06	501455		4.04066e+06
FALSE		High	Unambiguous	NAADSIQLEHITR	[K].NAADSIQLEHITR.[I]			0.0011863	5.15092e-05	0.906	1	1	1	731352504	731352504 [219-231]			PREDICTED: eukaryotic translation initiation factor 3 subunit K [Beta vulgaris subsp. vulgaris]	731352504	0	1467.76	13				939.2						60.8				757571						139383				2.15253e+06
FALSE		High	Unambiguous	MYVTMDRYENDWEVVKR	[R].MYVTMDRYENDWEVVKR.[G]			3.17468e-06	5.15092e-05	1.688	2	2	5	731310533; 731344436	731310533 [207-223]; 731344436 [207-223]			PREDICTED: 2,3-bisphosphoglycerate-independent phosphoglycerate mutase [Beta vulgaris subsp. vulgaris] PREDICTED: 2,3-bisphosphoglycerate-independent phosphoglycerate mutase [Beta vulgaris subsp. vulgaris]	731310533; 731344436	2	2234.04	17	192.9		28.9		119.9	119.6	126.8	122.6	153.7	135.5	2.91225e+06		257484		2.3825e+06	799459	1.88082e+06	1.99393e+06	2.92618e+06	4.41427e+06	6.28602e+06		942248		3.90645e+06		3.89763e+06
FALSE		High	Unambiguous	MYVTMDRYENDWEVVK	[R].MYVTMDRYENDWEVVK.[R]			1.46669e-05	5.15092e-05	1.486	2	2	8	731310533; 731344436	731310533 [207-222]; 731344436 [207-222]			PREDICTED: 2,3-bisphosphoglycerate-independent phosphoglycerate mutase [Beta vulgaris subsp. vulgaris] PREDICTED: 2,3-bisphosphoglycerate-independent phosphoglycerate mutase [Beta vulgaris subsp. vulgaris]	731310533; 731344436	1	2077.94	16	21.5	113.8	7.2	5.9	6.3	350.4	179.1	95.4	114.9	105.5	911241	3.96194e+06	178965	191081	349553	6.56674e+06	7.44946e+06	4.35289e+06	6.13414e+06	9.63709e+06	1.96689e+06	1.0397e+07	654913	542930	573142		3.2015e+07
FALSE		High	Unambiguous	MYVQDKIEEYSDEIFKMLDNGAHIYFCGLK	[K].MYVQDKIEEYSDEIFKMLDNGAHIYFCGLK.[G]	1xCarbamidomethyl [C27]	1xCarbamidomethyl [C27]	4.56437e-07	5.15092e-05	1.944	1	1	6	731360654	731360654 [308-337]			PREDICTED: ferredoxin--NADP reductase, root isozyme, chloroplastic [Beta vulgaris subsp. vulgaris]	731360654	2	3656.71	30		52			165.3	10.5	284.3	171.2	272.1	44.6		379784			1.9325e+06	41435.8	2.48032e+06	1.63792e+06	3047799	854487		996636			3.16862e+06		202013
FALSE		High	Unambiguous	MYVQDKIEEYSDEIFK	[K].MYVQDKIEEYSDEIFK.[M]	1xOxidation [M1]	1xOxidation [M1]	5.0368e-07	5.15092e-05	1.931	1	1	4	731360654	731360654 [308-323]			PREDICTED: ferredoxin--NADP reductase, root isozyme, chloroplastic [Beta vulgaris subsp. vulgaris]	731360654	1	2052.95	16	67.9			47.3	338	446.3	18.5		28.5	53.5	1.2024e+06			636039	7.8772e+06	3.49835e+06	321922		635933	2044702	2.59536e+06			1.80721e+06	1.29158e+07		1.70556e+07
FALSE		High	Unambiguous	MYVQDKIEEYSDEIFK	[K].MYVQDKIEEYSDEIFK.[M]			4.06449e-11	5.15092e-05	3.175	1	1	32	731360654	731360654 [308-323]			PREDICTED: ferredoxin--NADP reductase, root isozyme, chloroplastic [Beta vulgaris subsp. vulgaris]	731360654	1	2036.95	16	136.7	199.6	150.3	124.3	137.7	35.4	17.4	38.7	81.1	78.9	2.80285e+07	3.36619e+07	1.81768e+07	1.93608e+07	3.71606e+07	3.2161e+06	3.49872e+06	8.55269e+06	2.09717e+07	3.49373e+07	6.04989e+07	8.83359e+07	6.6517e+07	5.50109e+07	6.09301e+07		1.56795e+07
FALSE		High	Unambiguous	MYTTRPLSLYK	[-].MYTTRPLSLYK.[KN]	1xAcetyl [N-Term]	1xAcetyl [N-Term]	0.000383981	5.15092e-05	1.055	1	2	3	731340352	731340352 [1-11]	731340352 1xAcetyl [N-Term]	731340352 1xAcetyl [N-Term]	PREDICTED: uncharacterized protein LOC104896314 [Beta vulgaris subsp. vulgaris]	731340356; 731340352	0	1414.74	11	12.3			73.5	562.1	89.2	35.2			227.8	165603			751570	9960580	531844	465161			6.61801e+06	357450			2.13548e+06	1.63318e+07		2.59291e+06
FALSE		High	Unambiguous	NAAFVLVAGGLGER	[K].NAAFVLVAGGLGER.[L]			2.76834e-07	5.15092e-05	2.01	1	1	2	731313216	731313216 [134-147]			PREDICTED: UDP-sugar pyrophosphorylase 1 [Beta vulgaris subsp. vulgaris]	731313216	0	1373.75	14						181.1		340.6	184.5	293.9						639764		2.92893e+06	1.85639e+06	5.0622e+06							3.11906e+06
FALSE		High	Unambiguous	NADFSLNVEEIAR	[R].NADFSLNVEEIAR.[V]			2.22359e-06	5.15092e-05	1.735	1	2	2	731310818	731310818 [192-204]			PREDICTED: histidinol-phosphate aminotransferase, chloroplastic isoform X1 [Beta vulgaris subsp. vulgaris]	731310818; 1108870341	0	1477.73	13				77.3	10.9	119.2	242.9	284	225.7	40.1				418394	101924	375973	1.70121e+06	2.18109e+06	2.02844e+06	616986				1.1888e+06	167119		1.83299e+06
FALSE		High	Unambiguous	NADLANLLIDPEFSK	[R].NADLANLLIDPEFSK.[E]			4.84672e-08	5.15092e-05	2.24	1	1	7	731340274	731340274 [391-405]			PREDICTED: 6-phosphogluconate dehydrogenase, decarboxylating 1 [Beta vulgaris subsp. vulgaris]	731340274	0	1659.86	15	234.5	100	35.3	121.9	366.4	50.5	26.7	22.1	29.2	13.4	1.1356e+07	3.98091e+06	1.00836e+06	4485583	23354624	1.08318e+06	1.2705e+06	1.15524e+06	1782595	1.39591e+06	2.45117e+07	1.04468e+07	3.69002e+06	1.27451e+07	3.82932e+07		5.28084e+06
FALSE		High	Unambiguous	NADLANLLIDPEFSKEMIER	[R].NADLANLLIDPEFSKEMIER.[Q]			3.76793e-11	5.15092e-05	3.185	1	1	11	731340274	731340274 [391-410]			PREDICTED: 6-phosphogluconate dehydrogenase, decarboxylating 1 [Beta vulgaris subsp. vulgaris]	731340274	1	2318.17	20	116.1	73.1	39.1	143.4	275.5	116.9	39.3	72.1	45.1	79.4	7.27837e+06	3.76836e+06	1.44372e+06	6.82708e+06	22728981	3.24252e+06	2.42092e+06	4.8716e+06	3.56623e+06	1.07412e+07	1.57102e+07	9.88897e+06	5.28321e+06	1.93981e+07	3.72674e+07		1.58084e+07
FALSE		High	Unambiguous	NAKIDMFKGSMR	[R].NAKIDMFKGSMR.[L]			2.49263e-05	5.15092e-05	1.416	1	1	1	731342761	731342761 [88-99]			PREDICTED: uncharacterized protein At4g28440 [Beta vulgaris subsp. vulgaris]	731342761	2	1397.7	12				26.4		95.9	204	471.5	67.4	134.8				85626.8		181073	855172	2.16753e+06	362508	1.24154e+06				243296			882792
FALSE		High	Unambiguous	NAHNVAEVMNLIGDVR	[R].NAHNVAEVMNLIGDVR.[G]			2.126e-05	5.15092e-05	1.437	1	1	1	731332603	731332603 [279-294]			PREDICTED: ribose-phosphate pyrophosphokinase 2, chloroplastic [Beta vulgaris subsp. vulgaris]	731332603	0	1751.89	16			73.3	284.9						641.8			59326.4	297097						1.9014e+06			217101	844157
FALSE		High	Unambiguous	NAGVNGSVVSEKVLSNDNTR	[K].NAGVNGSVVSEKVLSNDNTR.[Y]			1.2887e-06	5.15092e-05	1.807	1	1	1	731322356	731322356 [519-538]			PREDICTED: ruBisCO large subunit-binding protein subunit beta, chloroplastic [Beta vulgaris subsp. vulgaris]	731322356	1	2060.04	20	65.1		211.9				372.4	23.8	148.3	178.5	161219		309566				906513	63604.6	463256	954254	347987		1.13284e+06
FALSE		High	Unambiguous	NAGVNGSVVSEK	[K].NAGVNGSVVSEK.[V]			1.01895e-06	5.15092e-05	1.838	1	1	3	731322356	731322356 [519-530]			PREDICTED: ruBisCO large subunit-binding protein subunit beta, chloroplastic [Beta vulgaris subsp. vulgaris]	731322356	0	1160.59	12	195.6		132.7		99.5		188.1	181.8	169.5	32.8	1.07062e+06		428666		717456		1.01222e+06	1.07244e+06	1.17013e+06	387548	2.3109e+06		1.56868e+06		1.17637e+06
FALSE		High	Unambiguous	NAGVNGAVVIEK	[K].NAGVNGAVVIEK.[V]			0.000117797	5.15092e-05	1.211	1	1	1	731359729	731359729 [522-533]			PREDICTED: ruBisCO large subunit-binding protein subunit beta, chloroplastic-like [Beta vulgaris subsp. vulgaris]	731359729	0	1170.65	12	30.4		68.7	28		81.4	173.1	243.2	170.3	204.9	157444		209515	110056		186433	880073	1.35594e+06	1111482	2.28836e+06	339839		766707	312706			908923
FALSE		High	Unambiguous	NAGMSVVMVPDPR	[K].NAGMSVVMVPDPR.[L]			7.70309e-06	5.15092e-05	1.571	1	1	5	731354258	731354258 [195-207]			PREDICTED: (DL)-glycerol-3-phosphatase 2 [Beta vulgaris subsp. vulgaris]	731354258	0	1372.67	13	7.1		87.6	141.7			173.5	335.2	125.2	129.7	72202.1		524331	1.09244e+06			1.73018e+06	3666885	1.60209e+06	2.84172e+06	155846		1.91876e+06	3.10401e+06
FALSE		High	Unambiguous	NAGLPWELGLAETHQTLVANDLRGR	[K].NAGLPWELGLAETHQTLVANDLRGR.[T]			1.23934e-08	5.15092e-05	2.42	1	3	4	731321657	731321657 [1198-1222]			PREDICTED: glutamate synthase 1 [NADH], chloroplastic isoform X1 [Beta vulgaris subsp. vulgaris]	731321663; 731321657; 731321661	1	2731.43	25						113.6	348.2	153.8	191.8	192.7						636181	4.32969e+06	2.09778e+06	3.06032e+06	5262070							3.10159e+06
FALSE		High	Unambiguous	NAGLPWELGLAETHQTLVANDLR	[K].NAGLPWELGLAETHQTLVANDLR.[G]			3.31064e-12	5.15092e-05	3.506	1	3	14	731321657	731321657 [1198-1220]			PREDICTED: glutamate synthase 1 [NADH], chloroplastic isoform X1 [Beta vulgaris subsp. vulgaris]	731321663; 731321657; 731321661	0	2518.3	23	183.9	209.2	40.4	96.8	177.3	126.4	77.1	19.5	26	43.4	2.10939e+07	19734926	2.73537e+06	8.43823e+06	26764556	6.41699e+06	8.68405e+06	2.40423e+06	3.76361e+06	1.07527e+07	4.55306e+07	5.17887e+07	1.00099e+07	2.3976e+07	4.38843e+07		3.1285e+07
FALSE		High	Unambiguous	NAGGSDVGFFEKDGLLGLTDDIPLHVVFR	[R].NAGGSDVGFFEKDGLLGLTDDIPLHVVFR.[K]			2.28798e-09	5.15092e-05	2.643	1	1	4	731364406	731364406 [161-189]			PREDICTED: kunitz-type trypsin inhibitor alpha chain [Beta vulgaris subsp. vulgaris]	731364406	1	3088.57	29	296.8	329.5	177.2	24.4	42.7	72.1	10.6		27.6	19.1	5.54471e+06	5.06311e+06	1.95269e+06	346197	1.05138e+06	596433	194168		650535	772190	1.19681e+07	1.32867e+07	7.14576e+06	983667	1.72388e+06		2.90781e+06
FALSE		High	Unambiguous	NAGFPTIPSTIAEELETNPFMR	[R].NAGFPTIPSTIAEELETNPFMR.[V]			4.26351e-07	5.15092e-05	1.953	1	1	15	731319028	731319028 [206-227]			PREDICTED: hydroxyacylglutathione hydrolase cytoplasmic [Beta vulgaris subsp. vulgaris]	731319028	0	2435.19	22	68.7	38.1	81.1	162	98	65.3	85.9	227.4	114.6	58.9	2.27989e+06	1.04043e+06	1.58701e+06	4.0822e+06	4279973	959015	2.79831e+06	8.12721e+06	4.79485e+06	4.214e+06	4.92108e+06	2.73032e+06	5.80757e+06	1.1599e+07	7.01763e+06		4.67552e+06
FALSE		High	Unambiguous	NAGEMLDRLTLTYNRTR	[R].NAGEMLDRLTLTYNRTR.[Q]			0.00141178	5.15092e-05	0.883	1	1	1	731366699	731366699 [287-303]			PREDICTED: ATP synthase subunit gamma, mitochondrial [Beta vulgaris subsp. vulgaris]	731366699	2	2024.03	17	13.5					25.3	310.1	607.2		43.8	26717.2					22115.6	601122	1.29066e+06		186567	57668.4						107821
FALSE		High	Unambiguous	NAGEMLDRLTLTYNR	[R].NAGEMLDRLTLTYNR.[T]			1.19398e-07	5.15092e-05	2.121	1	1	12	731366699	731366699 [287-301]			PREDICTED: ATP synthase subunit gamma, mitochondrial [Beta vulgaris subsp. vulgaris]	731366699	1	1766.89	15	0.8		2.8	4.4		11.5	267	402.6	120.3	190.5	59624.5		127072	257776		389531	2.00298e+07	3.31245e+07	1.15859e+07	3.13879e+07	128698		465013	732431			1.89909e+06
FALSE		High	Unambiguous	NAFPNAGSLR	[K].NAFPNAGSLR.[G]			0.00141178	5.15092e-05	0.883	1	1	4	731316489	731316489 [93-102]			PREDICTED: peroxidase P7 [Beta vulgaris subsp. vulgaris]	731316489	0	1046.54	10	9.2		158.8	249.5	4.1	236.2	65.9	63.7	87.9	124.8	81216.5		825130	1.66984e+06	47131	921124	570290	604350	976555	2.3729e+06	175304		3.01951e+06	4.74461e+06	77278.1		4.49078e+06
FALSE		High	Unambiguous	NAFDGFTPSVPTGENLTFADENFIKYEETGVK	[K].NAFDGFTPSVPTGENLTFADENFIKYEETGVK.[E]			0.000181408	5.15092e-05	1.154	1	1	1	731313216	731313216 [99-130]			PREDICTED: UDP-sugar pyrophosphorylase 1 [Beta vulgaris subsp. vulgaris]	731313216	1	3537.67	32								576.9	423.1									797778	684681
FALSE		High	Unambiguous	NAESNAEMKGLDVDSLYISHIQVNQAQK	[K].NAESNAEMKGLDVDSLYISHIQVNQAQK.[Q]			2.74584e-08	5.15092e-05	2.315	1	2	3	731343236	731343236 [98-125]			PREDICTED: 60S ribosomal protein L17-2 [Beta vulgaris subsp. vulgaris]	731343236; 1108923184	1	3102.52	28								303.4	41.5	655								1.55794e+06	249545	6.73544e+06
FALSE		High	Unambiguous	NAENPAPVKEVAPDNEFEKR	[K].NAENPAPVKEVAPDNEFEKR.[I]			9.43497e-09	5.15092e-05	2.456	1	1	4	731321857	731321857 [481-500]			PREDICTED: uncharacterized protein LOC104888335 [Beta vulgaris subsp. vulgaris]	731321857	2	2254.11	20	2.4	9.4	26.9	3.1	5.6	584.9	59.5	31.6	65.4	211.3	45134	143826	293739	43266.3	136200	4.79955e+06	1.08298e+06	631792	1.52791e+06	8.4525e+06	97420.6	377431	1.07492e+06	122935	223320		2.33994e+07
FALSE		High	Unambiguous	NADYKEHQYIPR	[R].NADYKEHQYIPR.[R]			0.000114282	5.15092e-05	1.215	1	1	1	731344205	731344205 [350-361]			PREDICTED: uncharacterized protein LOC104897994 [Beta vulgaris subsp. vulgaris]	731344205	1	1533.74	12			58.5	271.3		97.1	175.3	237.6	160.1				139880	835416		174275	698380	1.03795e+06	818496				511884	2.37371e+06			849647
FALSE		High	Unambiguous	NAWAEAFNHLVAAIKAEMQR	[K].NAWAEAFNHLVAAIKAEMQR.[L]			4.0621e-12	5.15092e-05	3.479	1	2	10	733214039	733214039 [147-166]			non-symbiotic hemoglobin 1-like [Beta vulgaris subsp. vulgaris]	731358830; 733214039	1	2270.15	20	134.5	162.2	284.7	284.1	44.5	38.6	9.2	14.8	11.5	15.9	9.42739e+06	9.35101e+06	1.17728e+07	1.5132e+07	4.10827e+06	1.19821e+06	632867	1.11878e+06	1.01591e+06	2.40129e+06	2.03488e+07	2.45391e+07	4.30818e+07	4.29953e+07	6.7361e+06		5.84165e+06
FALSE		High	Unambiguous	MYTGNYDQYVQTR	[K].MYTGNYDQYVQTR.[S]			0.000420511	5.15092e-05	1.043	1	1	4	731355383	731355383 [289-301]			PREDICTED: ABC transporter F family member 1 [Beta vulgaris subsp. vulgaris]	731355383	0	1638.72	13	43			19.8		152.1	232.3	65.8	241	246	139722			48870.6		218769	741661	230525	987618	1.72543e+06	301587			138859			1.06657e+06
FALSE		High	Unambiguous	NAWESIGADFEKVDEYGLGPR	[R].NAWESIGADFEKVDEYGLGPR.[E]			6.96014e-11	5.15092e-05	3.104	1	1	11	731358716	731358716 [782-802]			PREDICTED: coatomer subunit gamma [Beta vulgaris subsp. vulgaris]	731358716	1	2353.11	21	193.6	143.1	170.9	32	345.8	8.3	31.5	20.6	37.7	16.5	1.18238e+07	7.18837e+06	6.15564e+06	1.48619e+06	2.78028e+07	223306	1.89225e+06	1.35817e+06	2.90172e+06	2.171e+06	2.55215e+07	1.88638e+07	2.25262e+07	4.22279e+06	4.55867e+07		1.08869e+06
FALSE		High	Unambiguous	NAYPSWSPAAVK	[R].NAYPSWSPAAVK.[S]			0.000130977	5.15092e-05	1.197	1	1	1	731348044	731348044 [585-596]			PREDICTED: subtilisin-like protease SBT1.4 [Beta vulgaris subsp. vulgaris]	731348044	0	1290.65	12	20.1			117.9			183.5	230.8	201.2	246.5	81229.7			362265			729483	1.00591e+06	1.0263e+06	2.15188e+06	175332			1.02932e+06
FALSE		High	Unambiguous	NFFQQIISGVEYCHR	[R].NFFQQIISGVEYCHR.[N]	1xCarbamidomethyl [C13]	1xCarbamidomethyl [C13]	7.24585e-07	5.15092e-05	1.883	1	1	3	731314742	731314742 [121-135]			PREDICTED: SNF1-related protein kinase catalytic subunit alpha KIN10 [Beta vulgaris subsp. vulgaris]	731314742	0	1897.9	15	255.1	183		116.4	439.7	5.7					4.89726e+06	2.89022e+06		1.69808e+06	1.11139e+07	48529.9					1.05706e+07	7.58457e+06		4.82484e+06	1.82229e+07		236599
FALSE		High	Unambiguous	NFFKVTTTDDPVIR	[R].NFFKVTTTDDPVIR.[R]			3.45253e-05	5.15092e-05	1.373	1	1	3	731369461	731369461 [243-256]			PREDICTED: eukaryotic translation initiation factor 3 subunit D [Beta vulgaris subsp. vulgaris]	731369461	1	1652.86	14	11.9		24.8	86.5		26.8	156	394.1	27.5	272.3	69656		85912.5	386218		69773.4	900610	2.49548e+06	204017	3.45336e+06	150351		314392	1.09738e+06			340168
FALSE		High	Unambiguous	NFEGRVHPLTR	[R].NFEGRVHPLTR.[A]			0.000952548	5.15092e-05	0.935	1	1	1	731329677	731329677 [658-668]			PREDICTED: putative aconitate hydratase, cytoplasmic [Beta vulgaris subsp. vulgaris]	731329677	1	1325.71	11			9.2	18.3		127.5	207	431.5	138.1	68.4			29592	75620.4		307501	1.10788e+06	2.53316e+06	949004	804146			108290	214864			1.49917e+06
FALSE		High	Unambiguous	NFDVGYVPLRLPR	[K].NFDVGYVPLRLPR.[A]			0.000504321	5.15092e-05	1.019	1	1	5	731364732	731364732 [347-359]			PREDICTED: methionine aminopeptidase 2B-like [Beta vulgaris subsp. vulgaris]	731364732	1	1545.85	13				20.6		103.6	176.2	275.8	157.6	266.2				105788		310481	1.17216e+06	2.01163e+06	1.3451e+06	3.88874e+06				300581			1.5137e+06
FALSE		High	Unambiguous	NFDVGYVPLR	[K].NFDVGYVPLR.[L]			0.00100437	5.15092e-05	0.928	1	1	2	731364732	731364732 [347-356]			PREDICTED: methionine aminopeptidase 2B-like [Beta vulgaris subsp. vulgaris]	731364732	0	1179.62	10	272.7		120.6		186.7	189.3	71.5	30.1	82.1	46.9	925853		241552		834604	284621	238519	110290	351487	344004	1.99843e+06		883947		1.36845e+06		1.38762e+06
FALSE		High	Unambiguous	NFAVDEQNIAAVQYAR	[R].NFAVDEQNIAAVQYAR.[S]			8.63467e-05	5.15092e-05	1.252	1	1	2	731349169	731349169 [234-249]			PREDICTED: receptor-like protein kinase HERK 1 [Beta vulgaris subsp. vulgaris]	731349169	0	1808.89	16					33.9	128.3	318.1	234.6	172.5	112.7					100247	127512	701681	567566	488350	546028					164369		621661
FALSE		High	Unambiguous	NFAFVQYESLDDATKALDATNLSK	[R].NFAFVQYESLDDATKALDATNLSK.[L]			9.45155e-06	5.15092e-05	1.544	1	2	1	731363572	731363572 [128-151]			PREDICTED: serine/arginine-rich splicing factor RS40 isoform X1 [Beta vulgaris subsp. vulgaris]	731363576; 731363572	1	2661.3	24						287.6				712.4						233390				2.81786e+06							1.13786e+06
FALSE		High	Unambiguous	NFGVTEFVNPK	[K].NFGVTEFVNPK.[D]			0.000105144	5.15092e-05	1.226	1	1	8	731347078	731347078 [238-248]			PREDICTED: alcohol dehydrogenase class-3 [Beta vulgaris subsp. vulgaris]	731347078	0	1251.64	11	38	251.5	78.3	170.4	6	73.8	29.3	211.8	66.1	74.8	1.02424e+06	5.58242e+06	1.24635e+06	3.49262e+06	214337	881621	777069	6.15858e+06	2.24809e+06	4.35544e+06	2.2108e+06	1.46495e+07	4.56095e+06	9.92375e+06	351436		4.29819e+06
FALSE		High	Unambiguous	NFAFIQYETLEDATR	[R].NFAFIQYETLEDATR.[A]			1.96859e-07	5.15092e-05	2.055	1	3	4	731361463	731361463 [131-145]			PREDICTED: serine/arginine-rich splicing factor RS40 isoform X1 [Beta vulgaris subsp. vulgaris]	731361465; 731361463; 1108781148	0	1817.87	15	32.4		83.6	118.3	14.7	120	79.8	125	93.9	332.2	407841		620817	1.13095e+06	244025	668603	986842	1.6959e+06	1.49049e+06	9.02349e+06	880314		2.27184e+06	3.21344e+06	400113		3.25966e+06
FALSE		High	Unambiguous	NEYILEDYAPGQFGDR	[K].NEYILEDYAPGQFGDR.[I]			3.55468e-07	5.15092e-05	1.977	1	1	35	731313066	731313066 [25-40]			PREDICTED: albumin-2 [Beta vulgaris subsp. vulgaris]	731313066	0	1886.86	16	290.6	162.8	38.9	147	136.8	37.3	32.2	30.8	67.4	56.3	2.36766e+07	1.09147e+07	1.86875e+06	9.09827e+06	1.46738e+07	1.34417e+06	2.58016e+06	2.70094e+06	6.92428e+06	9.90582e+06	5.11055e+07	2.86426e+07	6.83857e+06	2.58514e+07	2.40598e+07		6.5533e+06
FALSE		High	Unambiguous	NEYCMEVTPK	[K].NEYCMEVTPK.[T]	1xCarbamidomethyl [C4]	1xCarbamidomethyl [C4]	0.00145515	5.15092e-05	0.879	1	1	1	731366257	731366257 [248-257]			PREDICTED: UTP--glucose-1-phosphate uridylyltransferase [Beta vulgaris subsp. vulgaris]	731366257	0	1270.54	10			447.3	374.4	178.3								368104	396860	327423								1.34705e+06	1.12762e+06	536857
FALSE		High	Unambiguous	NESHVPAALPAGFGASATAK	[R].NESHVPAALPAGFGASATAK.[I]			3.4748e-07	5.15092e-05	1.98	1	1	2	731323870	731323870 [149-168]			PREDICTED: zinc finger CCCH domain-containing protein 14 [Beta vulgaris subsp. vulgaris]	731323870	0	1895.96	20						322.9			84.1	593.1						162030			120173	1451171							789950
FALSE		High	Unambiguous	NEQIDLMKPDATVILR	[R].NEQIDLMKPDATVILR.[N]	1xOxidation [M7]	1xOxidation [M7]	1.09979e-05	5.15092e-05	1.524	1	1	2	731371557	731371557 [106-121]			PREDICTED: uncharacterized protein At4g28440 [Beta vulgaris subsp. vulgaris]	731371557	0	1871.99	16								220.8	415.2	364								442428	973415	1.46036e+06
FALSE		High	Unambiguous	NEQIDLMKPDATVILR	[R].NEQIDLMKPDATVILR.[N]			6.17644e-08	5.15092e-05	2.208	1	1	11	731371557	731371557 [106-121]			PREDICTED: uncharacterized protein At4g28440 [Beta vulgaris subsp. vulgaris]	731371557	0	1855.99	16	2.7	92.3	9.1	41.5	10	81.7	56.3	303.8	182.5	220	147598	4.10157e+06	290358	1.7032e+06	708136	1.95366e+06	2.98626e+06	1.76829e+07	1.24337e+07	2.56487e+07	318586	1.07634e+07	1.06255e+06	4.83938e+06	1.16109e+06		9.52475e+06
FALSE		High	Unambiguous	NENLFGSVGDDGR	[K].NENLFGSVGDDGR.[L]			8.95289e-08	5.15092e-05	2.159	1	1	2	731357728	731357728 [216-228]			PREDICTED: WD-40 repeat-containing protein MSI2 [Beta vulgaris subsp. vulgaris]	731357728	0	1379.62	13	71.4	16.9		32.9		122.9		264.4	67.2	424.3	126419	24631.6		44335.2		96368.3		504738	150152	1.62228e+06	272872	64638.7		125972			469827
FALSE		High	Unambiguous	NEMQFFYEEQLHR	[R].NEMQFFYEEQLHR.[M]			0.00174476	5.15092e-05	0.855	1	2	1	731366217	731366217 [415-427]			PREDICTED: serine/threonine protein phosphatase 2A regulatory subunit B''beta isoform X1 [Beta vulgaris subsp. vulgaris]	731366219; 731366217	0	1770.79	13					877.6	72.4	35.9			14					2.2284e+06	61816.7	68089.8			58434.3					3.65377e+06		301377
FALSE		High	Unambiguous	NFADVGGGVLGCR	[K].NFADVGGGVLGCR.[G]	1xCarbamidomethyl [C12]	1xCarbamidomethyl [C12]	0.000119596	5.15092e-05	1.209	1	1	5	731355856	731355856 [238-250]			PREDICTED: protein argonaute 4 [Beta vulgaris subsp. vulgaris]	731355856	0	1321.63	13	83.4	65.4	104.2	161.3	69.9	91.8	53.9	69.7	83.4	217	958054	618009	706335	1.4081e+06	1.05773e+06	466821	608638	863281	1.20932e+06	5.38112e+06	2.06794e+06	1.62179e+06	2.58479e+06	4.00091e+06	1.73429e+06		2.27591e+06
FALSE		High	Unambiguous	NEGIDLTHNPEFTTCEFYEAFADYNDIMER	[R].NEGIDLTHNPEFTTCEFYEAFADYNDIMER.[T]	1xCarbamidomethyl [C15]	1xCarbamidomethyl [C15]	1.91205e-05	5.15092e-05	1.451	1	3	1	731323066	731323066 [357-386]			PREDICTED: lysine--tRNA ligase [Beta vulgaris subsp. vulgaris]	731323066; 731323072; 731323070	0	3641.55	30										1000										1.44213e+06
FALSE		High	Unambiguous	NFKGSLDGFKVNAVDTTGAGDSFVGALLNK	[K].NFKGSLDGFKVNAVDTTGAGDSFVGALLNK.[I]			4.22637e-09	5.15092e-05	2.562	1	1	15	731323052	731323052 [249-278]			PREDICTED: probable fructokinase-4 [Beta vulgaris subsp. vulgaris]	731323052	2	3042.55	30	11.3	74.5	139.5		1.1	318.8	85.4	113.9	104.3	151.3	929768	5.05704e+06	6.78944e+06		117562	1.16455e+07	6.92199e+06	1.01295e+07	1.08522e+07	2.69524e+07	2.00688e+06	1.32707e+07	2.48456e+07		192760		5.67757e+07
FALSE		High	Unambiguous	NFLDGDLIESFLDLSR	[R].NFLDGDLIESFLDLSR.[S]			8.96801e-05	5.15092e-05	1.247	1	1	2	731351428	731351428 [1046-1061]			PREDICTED: DNA damage-binding protein 1 [Beta vulgaris subsp. vulgaris]	731351428	0	1853.93	16	90.1	77.3	79.4	160.1	75	109.9	298.1	43.7	66.4		538911	380287	279864	727128	590588	290778	1.75124e+06	281671	500349		1.16323e+06	997956	1.02415e+06	2.06603e+06	968353		1.41764e+06
FALSE		High	Unambiguous	NFVPGYQQAINGEWNVAGIAYR	[R].NFVPGYQQAINGEWNVAGIAYR.[A]			1.08198e-07	5.15092e-05	2.134	1	1	22	731366157	731366157 [174-195]			PREDICTED: formate dehydrogenase 1, mitochondrial [Beta vulgaris subsp. vulgaris]	731366157	0	2467.22	22	46.2	45.5	54.6	41.8	117.7	100.2	148.7	177.4	146.4	121.5	2.37399e+06	1.92207e+06	1.65639e+06	1.63237e+06	7.96046e+06	2.2811e+06	7.51206e+06	9.82469e+06	9.48652e+06	1.34805e+07	5.12421e+06	5.04393e+06	6.06146e+06	4.63815e+06	1.30523e+07		1.11211e+07
FALSE		High	Unambiguous	NFVGQASTSPGISGQTIQESMR	[R].NFVGQASTSPGISGQTIQESMR.[L]			0.000764813	5.15092e-05	0.964	1	1	1	731358722	731358722 [105-126]			PREDICTED: 2-oxoglutarate dehydrogenase, mitochondrial [Beta vulgaris subsp. vulgaris]	731358722	0	2295.1	22									689.4	310.6									1.49714e+06	1154598
FALSE		High	Unambiguous	NFVAEKIAEMPKPEASIEDVDLGGVSKDGVTYNAK	[K].NFVAEKIAEMPKPEASIEDVDLGGVSKDGVTYNAK.[V]			2.12478e-06	5.15092e-05	1.741	1	1	1	731311489	731311489 [10-44]			PREDICTED: desiccation protectant protein Lea14 homolog [Beta vulgaris subsp. vulgaris]	731311489	2	3721.86	35							606.1	285.2	108.7								2.72412e+06	1.40565e+06	627199
FALSE		High	Unambiguous	NFTLNFGPQHPAAHGVLR	[K].NFTLNFGPQHPAAHGVLR.[L]			1.71763e-07	5.15092e-05	2.073	1	1	7	162279924	162279924 [7-24]			nad7 gene product (mitochondrion) [Beta vulgaris subsp. vulgaris]	162279924	0	1976.02	18	265.9	286.3	37	88.6	49.2	34.4	41.4	96.5	24.7	76	5.54662e+06	4.91124e+06	454782	1.40352e+06	1.35168e+06	317760	848842	2.16901e+06	650180	3.42226e+06	1.19723e+07	1.28881e+07	1.66425e+06	3.98788e+06	2.21627e+06		1.54919e+06
FALSE		High	Unambiguous	NFTLEEQAKVIVAPR	[K].NFTLEEQAKVIVAPR.[S]			0.000217575	5.15092e-05	1.13	1	1	1	731331272	731331272 [249-263]			PREDICTED: bifunctional dTDP-4-dehydrorhamnose 3,5-epimerase/dTDP-4-dehydrorhamnose reductase [Beta vulgaris subsp. vulgaris]	731331272	1	1714.95	15	348.6		62.3	41.7	38.2		45.4			463.8	692008		72906.1	62818.4	99928		88619.5			1.98736e+06	1.49368e+06		266795	178489	163846
FALSE		High	Unambiguous	NFTLEEQAK	[K].NFTLEEQAK.[V]			0.000173348	5.15092e-05	1.16	1	1	12	731331272	731331272 [249-257]			PREDICTED: bifunctional dTDP-4-dehydrorhamnose 3,5-epimerase/dTDP-4-dehydrorhamnose reductase [Beta vulgaris subsp. vulgaris]	731331272	0	1079.54	9	24.3	14.9	58.6	62	23.2	66.4	141.1	214	222.9	172.7	1.59574e+06	802518	2.26444e+06	3086057	2.00439e+06	1.9267e+06	9.08797e+06	1.51174e+07	1.84299e+07	2.44458e+07	3.44437e+06	2.10598e+06	8.28657e+06	8.76857e+06	3.28648e+06		9.39331e+06
FALSE		High	Unambiguous	NFSSPLPTKGPIVGFFGR	[R].NFSSPLPTKGPIVGFFGR.[H]			4.32099e-10	5.15092e-05	2.863	1	2	31	731337638	731337638 [130-147]			PREDICTED: mannose/glucose-specific lectin isoform X1 [Beta vulgaris subsp. vulgaris]	731337638; 731337642	1	1921.03	18	19.9	31.5	29.2	36.5		329	141.8	130.5	88.3	193.3	1.67018e+06	2.17094e+06	1.44477e+06	2.32546e+06		1.22078e+07	1.16783e+07	1.17848e+07	9.33534e+06	3.49642e+07	3.60505e+06	5.69702e+06	5.28705e+06	6.60745e+06			5.9517e+07
FALSE		High	Unambiguous	NFIAADWGELPQSLIR	[K].NFIAADWGELPQSLIR.[D]			4.95232e-10	5.15092e-05	2.845	1	1	36	731345339	731345339 [94-109]			PREDICTED: succinate dehydrogenase subunit 5, mitochondrial [Beta vulgaris subsp. vulgaris]	731345339	0	1829.95	16	116.9	98.3	151.2	97.2	159.8	125.6	40.2	77	56.2	77.6	2.75031e+07	1.90203e+07	2.09873e+07	1.73749e+07	4.94952e+07	1.30887e+07	9.30506e+06	1.9526e+07	1.66913e+07	3.94062e+07	5.93647e+07	4.99133e+07	7.68016e+07	4.93681e+07	8.11544e+07		6.38119e+07
FALSE		High	Unambiguous	NFSEVVTEAK	[R].NFSEVVTEAK.[Q]			0.00106706	5.15092e-05	0.92	1	1	3	731321348	731321348 [743-752]			PREDICTED: bifunctional aspartokinase/homoserine dehydrogenase 2, chloroplastic [Beta vulgaris subsp. vulgaris]	731321348	0	1123.56	10	12.3		171.3	229.7		21.6	76	228.9	176.8	83.3	138129		1.13548e+06	1.96073e+06		107217	839252	2.7724e+06	2.50581e+06	2.02106e+06	298148		4.15521e+06	5.57112e+06			522716
FALSE		High	Unambiguous	NFPEILVSGVNAEFEQVSK	[R].NFPEILVSGVNAEFEQVSK.[I]			5.39833e-05	5.15092e-05	1.314	1	1	1	731322074	731322074 [65-83]			PREDICTED: jasmonate-induced protein homolog [Beta vulgaris subsp. vulgaris]	731322074	0	2107.07	19						266.1			221.4	512.4						114476			271340	1074525							558110
FALSE		High	Unambiguous	NFNWAVFGNELK	[K].NFNWAVFGNELK.[W]			0.000122345	5.15092e-05	1.206	1	4	4	731361994	731361994 [797-808]			PREDICTED: uncharacterized protein LOC104905743 isoform X1 [Beta vulgaris subsp. vulgaris]	731361998; 731361996; 731362000; 731361994	0	1438.71	12	169.3	27.8	43	51.2	333	67.6		112.4	176.2	19.6	3.05993e+06	413980	458303	702678	7924417	541433		2.18992e+06	4.01658e+06	764952	6.60478e+06	1.08637e+06	1.67713e+06	1.99656e+06	1.29932e+07		2.63966e+06
FALSE		High	Unambiguous	NFNPNYDLEILIK	[K].NFNPNYDLEILIK.[N]			2.92249e-05	5.15092e-05	1.395	1	1	5	731328292	731328292 [48-60]			PREDICTED: bifunctional 3-dehydroquinate dehydratase/shikimate dehydrogenase, chloroplastic [Beta vulgaris subsp. vulgaris]	731328292	0	1592.83	13	228.5	164.9	14.4		192.7	184.5	53.2	28	21.7	112.1	4.74937e+06	2.81848e+06	176568		5.27138e+06	1.69742e+06	1.08622e+06	628197	569354	5.03082e+06	1.02514e+07	7.3963e+06	646141		8.64317e+06		8.27551e+06
FALSE		High	Unambiguous	NFNANACVWSK	[R].NFNANACVWSK.[G]	1xCarbamidomethyl [C7]	1xCarbamidomethyl [C7]	0.000105944	5.15092e-05	1.225	1	1	3	731319555	731319555 [214-224]			PREDICTED: probable xyloglucan endotransglucosylase/hydrolase protein 23 [Beta vulgaris subsp. vulgaris]	731319555	0	1310.59	11			90.9	294.2	31	38.9	161.6	166.3	88.9	128.2			283990	1.18385e+06	216177	91260.1	841300	949508	594189	1.46578e+06			1.03924e+06	3.36372e+06	354454		444923
FALSE		High	Unambiguous	NFLVIMAEYGR	[K].NFLVIMAEYGR.[L]			7.09094e-05	5.15092e-05	1.278	1	1	2	731322412	731322412 [133-143]			PREDICTED: ATP synthase subunit O, mitochondrial [Beta vulgaris subsp. vulgaris]	731322412	0	1312.67	11					28.4	340.9	347.1	78.3	127.9	77.4					195249	786839	1.7786e+06	439796	840906	870823					320139		3.8361e+06
FALSE		High	Unambiguous	NFISPPNMIVIR	[R].NFISPPNMIVIR.[S]			0.00113365	5.15092e-05	0.912	1	1	4	731363039	731363039 [241-252]			PREDICTED: eukaryotic translation initiation factor 2 subunit gamma [Beta vulgaris subsp. vulgaris]	731363039	0	1400.77	12	9.6			76.8		66.4	210.1	238.6	278.7	119.8	41939.7			255053		128470	902914	1124704	1.53751e+06	1.13103e+06	90525.9			724694			626334
FALSE		High	Unambiguous	NFIETALLSDLR	[K].NFIETALLSDLR.[I]			0.000662348	5.15092e-05	0.983	1	2	1	731317142	731317142 [17-28]			PREDICTED: exosome complex component RRP45B isoform X1 [Beta vulgaris subsp. vulgaris]	731317142; 731317144	0	1391.75	12
FALSE		High	Unambiguous	NFQLFQNHLVVFER	[R].NFQLFQNHLVVFER.[E]			1.11593e-06	5.15092e-05	1.826	1	1	4	731354472	731354472 [409-422]			PREDICTED: uncharacterized protein LOC104902518 [Beta vulgaris subsp. vulgaris]	731354472	0	1790.93	14	253.8		130.9	14.7		262.5	178.1	39.4	55.2	65.5	2155364		655953	94833.8		987010	1.48666e+06	360894	591078	1.20013e+06	4.6523e+06		2.40042e+06	269456			4.812e+06
FALSE		High	Unambiguous	NEEGGNSVTTVLLR	[R].NEEGGNSVTTVLLR.[G]			4.66656e-08	5.15092e-05	2.245	2	2	4	731322735; 731331364	731322735 [367-380]; 731331364 [367-380]			PREDICTED: T-complex protein 1 subunit theta [Beta vulgaris subsp. vulgaris] PREDICTED: T-complex protein 1 subunit theta [Beta vulgaris subsp. vulgaris]	731322735; 731331364	0	1488.77	14	73.9		84.8	356.1	43.1	31	80.5	18.3	115.3	197	1.07893e+06		730454	3.94822e+06	828186	200038	1.15499e+06	288495	2.122e+06	6.20652e+06	2.32884e+06		2.67305e+06	1.12183e+07	1.35793e+06		975250
FALSE		High	Unambiguous	NEASGALTGLTR	[R].NEASGALTGLTR.[V]			0.000467542	5.15092e-05	1.029	1	1	1	731354570	731354570 [416-427]			PREDICTED: threonine--tRNA ligase, mitochondrial 1 [Beta vulgaris subsp. vulgaris]	731354570	0	1189.62	12		52.2			505.8	442						40217.5			623521	183263						105539			1.02235e+06		893469
FALSE		High	Unambiguous	NEALAEANMK	[R].NEALAEANMK.[L]			0.000856776	5.15092e-05	0.949	1	1	1	731317764	731317764 [938-947]			PREDICTED: myosin-11 [Beta vulgaris subsp. vulgaris]	731317764	0	1090.52	10	206.5	102.1	493.5	197.9							696106	283255	981347	506826							1.50253e+06	743323	3.59118e+06	1.44007e+06
FALSE		High	Unambiguous	NDDELGKLLAGVTIAHGGVLPNINPVLLPK	[R].NDDELGKLLAGVTIAHGGVLPNINPVLLPK.[K]			1.06134e-14	5.15092e-05	4.264	1	1	28	731364908	731364908 [99-128]			PREDICTED: probable histone H2A.5 [Beta vulgaris subsp. vulgaris]	731364908	1	3077.74	30	143.8	184	165.2	32.3	31.6	214.6	14.9	74	70.5	69.2	2.13642e+07	2.24727e+07	1.44755e+07	3.63925e+06	6.18622e+06	1.411e+07	2.16937e+06	1.18372e+07	1.31976e+07	2.21943e+07	4.61141e+07	5.89732e+07	5.29722e+07	1.03404e+07	1.01432e+07		6.87911e+07
FALSE		High	Unambiguous	NDDEDAKEELYSLVTVAEIPAEGLK	[R].NDDEDAKEELYSLVTVAEIPAEGLK.[G]			4.84957e-07	5.15092e-05	1.936	1	1	5	731327320	731327320 [85-109]			PREDICTED: 60S ribosomal protein L31 [Beta vulgaris subsp. vulgaris]	731327320	1	2748.35	25				13.3	273.8	216.6	82.2	166.6	130.3	117.2				167874	6.00347e+06	1.59731e+06	1.34599e+06	2.98987e+06	2.73708e+06	4.21281e+06				476989	9.84354e+06		7.78742e+06
FALSE		High	Unambiguous	NCYFPLFVSPGVLEKEKDHIEGFAPEVAWVTK	[K].NCYFPLFVSPGVLEKEKDHIEGFAPEVAWVTK.[S]	1xCarbamidomethyl [C2]	1xCarbamidomethyl [C2]	0.000290142	5.15092e-05	1.092	1	1	3	731364445	731364445 [144-175]			PREDICTED: proline--tRNA ligase, cytoplasmic [Beta vulgaris subsp. vulgaris]	731364445	2	3706.86	32	215	78.2	270.5	153.5		51.3	155.7		75.8		1.89231e+06	565934	1.40461e+06	1.02676e+06		200053	1.347e+06		841416		4.08451e+06	1.48513e+06	5.14008e+06	2.91739e+06			975322
FALSE		High	Unambiguous	NCYASLPDHGKVIVCEYILPVAPETNHAAR	[K].NCYASLPDHGKVIVCEYILPVAPETNHAAR.[T]	2xCarbamidomethyl [C2; C15]	2xCarbamidomethyl [C2; C15]	0.000206339	5.15092e-05	1.137	1	1	4	731321402	731321402 [279-308]			PREDICTED: caffeic acid 3-O-methyltransferase [Beta vulgaris subsp. vulgaris]	731321402	1	3394.67	30	91.5	60.5	15.7	109	16.7	68.4	301.2		143.4	193.5	520957	283624	52901.9	471616	125347	172528	1.68607e+06		1.03055e+06	2379067	1.12447e+06	744290	193591	1.34003e+06	205525		841132
FALSE		High	Unambiguous	NCYASLPDHGK	[K].NCYASLPDHGK.[V]	1xCarbamidomethyl [C2]	1xCarbamidomethyl [C2]	0.00153427	5.15092e-05	0.872	1	1	1	731321402	731321402 [279-289]			PREDICTED: caffeic acid 3-O-methyltransferase [Beta vulgaris subsp. vulgaris]	731321402	0	1261.56	11	1000										1.17272e+06										2.53129e+06
FALSE		High	Unambiguous	NCPEGSLLVGAISYGR	[K].NCPEGSLLVGAISYGR.[V]	1xCarbamidomethyl [C2]	1xCarbamidomethyl [C2]	1.6683e-05	5.15092e-05	1.469	1	1	4	731322402	731322402 [1075-1090]			PREDICTED: tripeptidyl-peptidase 2 [Beta vulgaris subsp. vulgaris]	731322402	0	1692.84	16		8.5			159.6		353.8	343.6	134.5			31134.9			937881		1.55239e+06	1.65332e+06	757613			81704.6			1.53779e+06
FALSE		High	Unambiguous	NCLPDSVVVQRIEEK	[R].NCLPDSVVVQRIEEK.[L]	1xCarbamidomethyl [C2]	1xCarbamidomethyl [C2]	0.000320163	5.15092e-05	1.079	1	1	1	731346697	731346697 [86-100]			PREDICTED: eukaryotic translation initiation factor 6 [Beta vulgaris subsp. vulgaris]	731346697	1	1785.92	15										1000										1.79108e+06
FALSE		High	Unambiguous	NDDELGKLLHGVTIAHGGVLPNINPILLPK	[R].NDDELGKLLHGVTIAHGGVLPNINPILLPK.[R]			4.42812e-07	5.15092e-05	1.948	1	1	9	731326456	731326456 [97-126]			PREDICTED: probable histone H2A.1 [Beta vulgaris subsp. vulgaris]	731326456	1	3157.77	30	59.2	217.5	218.4	37	19.9	234.5	5.9	106.6	52.5	48.5	2.41442e+06	7.30104e+06	5.2579e+06	1.14662e+06	1.06755e+06	4.23679e+06	237794	4.6881e+06	2.70172e+06	4.27058e+06	5.21147e+06	1.91595e+07	1.9241e+07	3.25795e+06	1.7504e+06		2.06557e+07
FALSE		High	Unambiguous	NCLPDSVVVQR	[R].NCLPDSVVVQR.[I]	1xCarbamidomethyl [C2]	1xCarbamidomethyl [C2]	0.000283623	5.15092e-05	1.095	1	1	4	731346697	731346697 [86-96]			PREDICTED: eukaryotic translation initiation factor 6 [Beta vulgaris subsp. vulgaris]	731346697	0	1286.65	11	18.8		153.3	146.1	5.6	245.6	90.8	101.2	112.6	126	334850		1.60821e+06	1.97366e+06	130958	1.93396e+06	1.58723e+06	1.93907e+06	2524776	4.83833e+06	722766		5.88514e+06	5.60785e+06	214725		9.42872e+06
FALSE		High	Unambiguous	NCHESLPEEGKVIICEYVVPESPK	[K].NCHESLPEEGKVIICEYVVPESPK.[T]	2xCarbamidomethyl [C2; C15]	2xCarbamidomethyl [C2; C15]	6.87159e-07	5.15092e-05	1.89	1	1	8	731322420	731322420 [283-306]			PREDICTED: caffeic acid 3-O-methyltransferase [Beta vulgaris subsp. vulgaris]	731322420	1	2813.35	24	82.8	136.1	40.8	117.5	417.2	75.7	21	97.2	2.7	9.1	6.09035e+06	8.22989e+06	1.77001e+06	6.56185e+06	4.0373e+07	2.46263e+06	1.51357e+06	7.69842e+06	248775	1.44257e+06	1.31459e+07	2.1597e+07	6.47725e+06	1.86445e+07	6.61972e+07		1.20062e+07
FALSE		High	Unambiguous	NCGIMFR	[K].NCGIMFR.[G]	1xCarbamidomethyl [C2]	1xCarbamidomethyl [C2]	0.000464015	5.15092e-05	1.03	1	1	5	731350872	731350872 [140-146]			PREDICTED: fumarylacetoacetase [Beta vulgaris subsp. vulgaris]	731350872	0	897.407	7		7.5				424.6	127.6	69.1	238.9	132.3		46972				1.43838e+06	959754	569837	2.30563e+06	2184982		123265					7.01258e+06
FALSE		High	Unambiguous	NCEIPHEGPFCDLMWSDPEDIETWAVSPR	[R].NCEIPHEGPFCDLMWSDPEDIETWAVSPR.[G]	2xCarbamidomethyl [C2; C11]	2xCarbamidomethyl [C2; C11]	9.87956e-08	5.15092e-05	2.146	1	1	4	731354470	731354470 [179-207]			PREDICTED: phytochrome-associated serine/threonine-protein phosphatase [Beta vulgaris subsp. vulgaris]	731354470	0	3487.5	29						477.6	210.5	59.8	82.3	169.8						1.34917e+06	1.3201e+06	411064	662102	2338111							6.57764e+06
FALSE		High	Unambiguous	NCDPEGPLMLYVSK	[R].NCDPEGPLMLYVSK.[M]	1xCarbamidomethyl [C2]	1xCarbamidomethyl [C2]	1.82603e-06	5.15092e-05	1.761	1	2	37	731362937	731362937 [369-382]			PREDICTED: elongation factor 2 [Beta vulgaris subsp. vulgaris]	731362937; 733214592	0	1622.76	14	107.7	56.7	40.6	165	78.5	66.9	76.7	136.1	96.7	175.2	1.66356e+07	7.19998e+06	3.69658e+06	1.93483e+07	15955061	4.57391e+06	1.1635e+07	2.26412e+07	1.88308e+07	5.83883e+07	3.59075e+07	1.88943e+07	1.35274e+07	5.49755e+07	2.61606e+07		2.22993e+07
FALSE		High	Unambiguous	NCDGFQVTKDDVEKIIDWENSAPK	[R].NCDGFQVTKDDVEKIIDWENSAPK.[L]	1xCarbamidomethyl [C2]	1xCarbamidomethyl [C2]	1.47353e-10	5.15092e-05	3.005	1	1	32	731329677	731329677 [170-193]			PREDICTED: putative aconitate hydratase, cytoplasmic [Beta vulgaris subsp. vulgaris]	731329677	2	2808.31	24	41.8	52	32.3	19.2	104.2	135.8	189.3	157	115.8	152.6	7.96943e+06	8.15615e+06	3.63889e+06	2.78408e+06	2.61635e+07	1.14732e+07	3.548e+07	3.22835e+07	2.78678e+07	6.2817e+07	1.72018e+07	2.14035e+07	1.33163e+07	7.91054e+06	4.28988e+07		5.59355e+07
FALSE		High	Unambiguous	NCDGFQVTKDDVEK	[R].NCDGFQVTKDDVEK.[I]	1xCarbamidomethyl [C2]	1xCarbamidomethyl [C2]	5.23126e-07	5.15092e-05	1.926	1	1	15	731329677	731329677 [170-183]			PREDICTED: putative aconitate hydratase, cytoplasmic [Beta vulgaris subsp. vulgaris]	731329677	1	1654.74	14	107.1	52.3	128.5	152.8	25.8	163.1	31.3	85.7	129.6	123.9	4.82772e+06	1.93887e+06	3.41655e+06	5.23402e+06	1.53099e+06	3.25601e+06	1.38508e+06	4.16556e+06	7.36948e+06	1.20593e+07	1.04205e+07	5.088e+06	1.25027e+07	1.48717e+07	2.51027e+06		1.58741e+07
FALSE		High	Unambiguous	NCDFQMER	[K].NCDFQMER.[Y]	1xCarbamidomethyl [C2]	1xCarbamidomethyl [C2]	0.000168174	5.15092e-05	1.164	2	2	19	731347955; 731317706	731347955 [26-33]; 731317706 [28-35]			PREDICTED: 40S ribosomal protein SA [Beta vulgaris subsp. vulgaris] PREDICTED: 40S ribosomal protein Sa-2 [Beta vulgaris subsp. vulgaris]	731347955; 731317706	0	1099.43	8	52.2	4.6	173.2	124	15.7	128	108.4	135.5	145.9	112.6	2.92558e+06	210612	5.72958e+06	5.28261e+06	1.16266e+06	3.17815e+06	5.97263e+06	8.1912e+06	1.03169e+07	1.3633e+07	6.31479e+06	552692	2.0967e+07	1.50097e+07	1.90635e+06		1.54945e+07
FALSE		High	Unambiguous	NCLAQLYAK	[R].NCLAQLYAK.[D]	1xCarbamidomethyl [C2]	1xCarbamidomethyl [C2]	0.000186989	5.15092e-05	1.15	1	1	11	731329055	731329055 [191-199]			PREDICTED: phosphoenolpyruvate carboxylase 2 [Beta vulgaris subsp. vulgaris]	731329055	0	1080.55	9	94.3	77.3	113.5	217		187.4	90.7	60.2	96.1	63.4	1.83161e+06	1.23468e+06	1.29968e+06	3.2009e+06		1.6113e+06	1.73046e+06	1.25908e+06	2.3539e+06	2.65761e+06	3.95348e+06	3.24007e+06	4.75611e+06	9.09489e+06			7.8556e+06
FALSE		High	Unambiguous	NDDELGKLLSGVTIAHGGVLPNINPVLLPK	[R].NDDELGKLLSGVTIAHGGVLPNINPVLLPK.[K]			1.90535e-11	5.15092e-05	3.275	1	1	18	731349093	731349093 [100-129]			PREDICTED: histone H2A [Beta vulgaris subsp. vulgaris]	731349093	1	3093.73	30	58.9	198.8	37.6	2.9		358	17.5	124.8	69.8	131.8	7364671	20442255	2.77106e+06	272984		1.98097e+07	2.1507e+06	1.68077e+07	10998246	3.55573e+07	1.58965e+07	5.36449e+07	1.01405e+07	775644			9.65788e+07
FALSE		High	Unambiguous	NDDEVSYAAFANLMHDHIIMDTWK	[K].NDDEVSYAAFANLMHDHIIMDTWK.[H]			1.83884e-07	5.15092e-05	2.064	1	1	3	731322420	731322420 [119-142]			PREDICTED: caffeic acid 3-O-methyltransferase [Beta vulgaris subsp. vulgaris]	731322420	0	2836.27	24	483.9	35.5	341.8	138.8							3.5814e+06	216374	1.49208e+06	780377							7.73037e+06	567813	5.46018e+06	2.21733e+06
FALSE		High	Unambiguous	NDDEVSYAAFANLMHDHIIMDTWK	[K].NDDEVSYAAFANLMHDHIIMDTWK.[H]	1xOxidation [M20]	1xOxidation [M20]	6.27808e-06	5.15092e-05	1.598	1	1	1	731322420	731322420 [119-142]			PREDICTED: caffeic acid 3-O-methyltransferase [Beta vulgaris subsp. vulgaris]	731322420	0	2852.27	24					876.4	14.7	53.4	40.6		14.9					4.52765e+06	25602.3	206060	171665		126216					7.42373e+06		124820
FALSE		High	Unambiguous	NDYNNYNQGVNQLSR	[R].NDYNNYNQGVNQLSR.[M]			5.82319e-05	5.15092e-05	1.304	1	1	2	731357726	731357726 [121-135]			PREDICTED: heavy metal-associated isoprenylated plant protein 26 [Beta vulgaris subsp. vulgaris]	731357726	0	1798.81	15						38.2	263.2	300.8	186.2	211.5						12313.1	188159	235802	170848	332142							60030.6
FALSE		High	Unambiguous	NDTEYKLETFSGVYR	[K].NDTEYKLETFSGVYR.[K]			1.15901e-06	5.15092e-05	1.821	1	1	23	1108878916	1108878916 [161-175]			PREDICTED: 40S ribosomal protein S7 [Beta vulgaris subsp. vulgaris]	1108878916	1	1821.87	15	121.5	165.6	66.6	184.1	57.7	79.1	60.1	56.7	109	99.8	6.08012e+06	6.81553e+06	1.96544e+06	6.99903e+06	3.80111e+06	1.75254e+06	2.95411e+06	3.05724e+06	6.87897e+06	1.07842e+07	1.31238e+07	1.78854e+07	7.19242e+06	1.98867e+07	6.23246e+06		8.54422e+06
FALSE		High	Unambiguous	NDQVEKMQAGATVTLR	[R].NDQVEKMQAGATVTLR.[N]			0.000564981	5.15092e-05	1.004	1	1	1	731342761	731342761 [72-87]			PREDICTED: uncharacterized protein At4g28440 [Beta vulgaris subsp. vulgaris]	731342761	1	1760.9	16			140.8			70.2	164.7	113.3	79.5	431.5			173385			64917.1	337798	254931	209253	1.94399e+06			634493				316492
FALSE		High	Unambiguous	NDQPRHETCYQIALAIKDEVEDLEK	[R].NDQPRHETCYQIALAIKDEVEDLEK.[A]	1xCarbamidomethyl [C9]	1xCarbamidomethyl [C9]	1.86801e-06	5.15092e-05	1.758	1	1	5	1108923008	1108923008 [581-605]			PREDICTED: 5-methyltetrahydropteroyltriglutamate--homocysteine methyltransferase [Beta vulgaris subsp. vulgaris]	1108923008	2	3014.45	25						829.1		19.9		151						2.1282e+06		124491		1.88981e+06							1.03757e+07
FALSE		High	Unambiguous	NDPNTILGKPFEDVK	[R].NDPNTILGKPFEDVK.[M]			0.000299066	5.15092e-05	1.088	1	1	3	731329667	731329667 [71-85]			PREDICTED: calcium-dependent protein kinase 33 [Beta vulgaris subsp. vulgaris]	731329667	0	1686.87	15	28.2	268.7	21.4	238.8		51.3	88	30.2	168.5	104.9	262262	2.05665e+06	117642	1688625		211352	804994	302884	1.97764e+06	2.1075e+06	566087	5.39708e+06	430503	4.79798e+06			1.03041e+06
FALSE		High	Unambiguous	NDPAKEAANFIAQVIIMNHPGQIGNGYAPVLDCHTSHIAVK	[K].NDPAKEAANFIAQVIIMNHPGQIGNGYAPVLDCHTSHIAVK.[F]	1xCarbamidomethyl [C33]	1xCarbamidomethyl [C33]	8.18871e-05	5.15092e-05	1.259	1	1	1	731318329	731318329 [319-359]			PREDICTED: elongation factor 1-alpha-like [Beta vulgaris subsp. vulgaris]	731318329	1	4411.21	41
FALSE		High	Unambiguous	NDPAFSYDETVQTAISALQSVLQEDFK	[K].NDPAFSYDETVQTAISALQSVLQEDFK.[A]			7.12014e-11	5.15092e-05	3.101	1	1	9	731374080	731374080 [185-211]			PREDICTED: proteasome subunit alpha type-6 [Beta vulgaris subsp. vulgaris]	731374080	0	3016.44	27	102	104.6	339.5	185.7	195.3	14.7	9.4		29.9	18.9	3.70455e+06	3126328	7.27486e+06	5.12447e+06	9341904	236231	335334		1.3694e+06	1.47824e+06	7.99619e+06	8.20415e+06	2.66219e+07	1.45604e+07	1.53174e+07		1.1517e+06
FALSE		High	Unambiguous	NDNSHNTNFPDSPEPIYGTQFLPR	[R].NDNSHNTNFPDSPEPIYGTQFLPR.[K]			8.81308e-09	5.15092e-05	2.465	1	1	11	731325703	731325703 [256-279]			PREDICTED: sulfite reductase 1 [ferredoxin], chloroplastic [Beta vulgaris subsp. vulgaris]	731325703	0	2760.26	24	164.2	120.5	24.2	98.8	206		106	177.2	88	15.2	5.34715e+06	3.22684e+06	464726	2.443e+06	8.83218e+06		3393388	6218069	3.61415e+06	1.06576e+06	1.15417e+07	8.46792e+06	1.70064e+06	6.94143e+06	1.44816e+07
FALSE		High	Unambiguous	NDLLTEGTFALVEMLR	[R].NDLLTEGTFALVEMLR.[G]			0.000222576	5.15092e-05	1.127	1	1	2	731348748	731348748 [691-706]			PREDICTED: neutral ceramidase [Beta vulgaris subsp. vulgaris]	731348748	0	1821.94	16					484.7			213.9	301.4						533941			192910	318171						875473
FALSE		High	Unambiguous	NDIFQYMAISLAK	[R].NDIFQYMAISLAK.[S]			0.000136033	5.15092e-05	1.192	1	1	1	731311599	731311599 [142-154]			PREDICTED: elongation factor Ts, mitochondrial [Beta vulgaris subsp. vulgaris]	731311599	0	1513.77	13	16.4	6.7		57.7	28	627.7	41.4	15.3	39.3	167.5	156035	52717.5		416554	350553	2.64275e+06	387155	156313	470889	3.43895e+06	336799	138342		1.18358e+06	574782		1.28843e+07
FALSE		High	Unambiguous	NDGPSGSITDTLR	[R].NDGPSGSITDTLR.[E]			0.000508154	5.15092e-05	1.018	1	1	1	1108951321	1108951321 [101-113]			PREDICTED: cell division protein FtsZ homolog 2-1, chloroplastic [Beta vulgaris subsp. vulgaris]	1108951321	0	1332.64	13
FALSE		High	Unambiguous	NDGGNEAIAAVVDSLGAK	[R].NDGGNEAIAAVVDSLGAK.[S]			2.79262e-05	5.15092e-05	1.401	1	1	1	731336366	731336366 [190-207]			PREDICTED: deoxyhypusine hydroxylase [Beta vulgaris subsp. vulgaris]	731336366	0	1700.84	18								271	425.7	303.3								264130	485573	592152
FALSE		High	Unambiguous	NDFTPEEEEEVRRENQWAFE	[K].NDFTPEEEEEVRRENQWAFE.[-]			0.000241915	5.15092e-05	1.116	2	2	8	731338602; 731357715	731338602 [139-158]; 731357715 [147-166]			PREDICTED: SKP1-like protein 1B [Beta vulgaris subsp. vulgaris] PREDICTED: SKP1-like protein 1B [Beta vulgaris subsp. vulgaris]	731338602; 731357715	2	2554.11	20	142	137.2		137.8	257.1	36.3	69.6	63	97.7	59.3	5789337	4602537		4.26946e+06	13801940	654804	2.78984e+06	2.7687e+06	5025929	5.21754e+06	1.24961e+07	1.2078e+07		1.2131e+07	2.26302e+07		3.19238e+06
FALSE		High	Unambiguous	NDFDTCTR	[R].NDFDTCTR.[L]	1xCarbamidomethyl [C6]	1xCarbamidomethyl [C6]	0.000548126	5.15092e-05	1.008	1	1	2	731367398	731367398 [22-29]			PREDICTED: 26S proteasome non-ATPase regulatory subunit 8 homolog A [Beta vulgaris subsp. vulgaris]	731367398	0	1028.41	8		199.9	618.1	182								606994	1.34581e+06	510413								1.59288e+06	4.9249e+06	1.45026e+06
FALSE		High	Unambiguous	NDEELSKLLGDVTIANGGVMPNIHNLLLPK	[R].NDEELSKLLGDVTIANGGVMPNIHNLLLPK.[K]			1.956e-05	5.15092e-05	1.448	1	1	2	731364978	731364978 [91-120]			PREDICTED: histone H2A.6 [Beta vulgaris subsp. vulgaris]	731364978	1	3214.71	30		309.9					512.2			177.9		453577					895859			683436		1.19028e+06
FALSE		High	Unambiguous	NDDPQTASRPWDKAR	[R].NDDPQTASRPWDKAR.[D]			0.000924142	5.15092e-05	0.939	1	1	2	731373256	731373256 [272-286]			PREDICTED: 3-oxoacyl-[acyl-carrier-protein] synthase I, chloroplastic [Beta vulgaris subsp. vulgaris]	731373256	1	1756.84	15			149.3			541.4	82.9		103.9	122.4			853066			2321288	788704		1269597	2.55937e+06			3.12174e+06				1.1317e+07
FALSE		High	Unambiguous	NDDPQTASRPWDK	[R].NDDPQTASRPWDK.[A]			1.74589e-05	5.15092e-05	1.463	1	1	7	731373256	731373256 [272-284]			PREDICTED: 3-oxoacyl-[acyl-carrier-protein] synthase I, chloroplastic [Beta vulgaris subsp. vulgaris]	731373256	0	1529.7	13	55	122.2	23.8	47.1		347.8	73.2	76	142.6	112.2	1244879	2273864	317268	810060		3.48365e+06	1.62747e+06	1.85311e+06	4.06815e+06	5.47744e+06	2.68704e+06	5.96711e+06	1.16102e+06	2.30167e+06			1.6984e+07
FALSE		High	Unambiguous	NAYHGGSGGALGLTALNTWK	[R].NAYHGGSGGALGLTALNTWK.[Y]			1.11528e-07	5.15092e-05	2.13	1	1	3	731326779	731326779 [189-208]			PREDICTED: alanine--glyoxylate aminotransferase 2 homolog 1, mitochondrial [Beta vulgaris subsp. vulgaris]	731326779	0	1988	20	5.2	342.2	81.8			20.6	115.7	155.3	122.1	157.2	62640.5	3.41501e+06	585217			110417	1.37907e+06	2.03088e+06	1.86893e+06	4.11548e+06	135208	8.96172e+06	2.14157e+06				538318
FALSE		High	Unambiguous	MTDTRADEAERGITIK	[R].MTDTRADEAERGITIK.[S]			3.31843e-08	5.15092e-05	2.29	1	2	15	731362937	731362937 [56-71]			PREDICTED: elongation factor 2 [Beta vulgaris subsp. vulgaris]	731362937; 733214592	2	1806.9	16						193	232	165.4	171.1	238.6						1.10675e+07	29531304	23093771	27956162	66712317							5.39576e+07
FALSE		High	Unambiguous	MYQLAQGGTAVGTGLNTK	[R].MYQLAQGGTAVGTGLNTK.[K]			8.16046e-11	5.15092e-05	3.083	1	1	11	731338403	731338403 [248-265]			PREDICTED: fumarate hydratase 1, mitochondrial [Beta vulgaris subsp. vulgaris]	731338403	0	1809.92	18			58.9	121.9		50	192.8	183.6	177.8	214.9			864615	2.30329e+06		550516	4712273	4.92053e+06	5.57834e+06	1.15371e+07			3.16401e+06	6.54445e+06			2.68395e+06
FALSE		High	Unambiguous	MYQGAGGEGGVPMDDDVPSAGASSGAGAGPK	[K].MYQGAGGEGGVPMDDDVPSAGASSGAGAGPK.[I]			1.2495e-07	5.15092e-05	2.115	1	1	8	731318762	731318762 [1491-1521]			PREDICTED: LOW QUALITY PROTEIN: uncharacterized protein LOC104887018 [Beta vulgaris subsp. vulgaris]	731318762	0	2793.21	31	5.1		215.9	285.8	137.4	21.1	44.7	35.3	137.3	117.3	62680.2		1.56962e+06	2675451	2.22932e+06	115014	541885	469481	2.13451e+06	3.12084e+06	135294		5.74394e+06	7.6019e+06	3.65529e+06		560733
FALSE		High	Unambiguous	MVDFVADYYK	[K].MVDFVADYYK.[N]			1.10815e-05	5.15092e-05	1.523	1	2	9	731347037	731347037 [23-32]			PREDICTED: tyrosine decarboxylase 1 isoform X1 [Beta vulgaris subsp. vulgaris]	731347039; 731347037	0	1250.58	10	210.4	2.8	36.4	119.3		67.7	122	127.8	107.2	206.3	2.51435e+06	27233.8	256395	1083382		358109	1.43325e+06	1.64662e+06	1.61653e+06	5.32258e+06	5.42716e+06	71467.3	938261	3.07827e+06			1.7459e+06
FALSE		High	Unambiguous	MVDAMEDLRAHLHR	[-].MVDAMEDLRAHLHR.[V]	1xMet-loss+Acetyl [N-Term]	1xMet-loss+Acetyl [N-Term]	1.86908e-05	5.15092e-05	1.454	1	5	7	731365305	731365305 [1-14]	731365305 1xMet-loss+Acetyl [N-Term]	731365305 1xMet-loss+Acetyl [N-Term]	PREDICTED: ubiquitin carboxyl-terminal hydrolase 14 isoform X1 [Beta vulgaris subsp. vulgaris]	731365305; 731365311; 731365309; 731365307; 731365313	1	1604.8	14	15.3		43.3	10.3	2.1	155.4	103.9	218.2	138.4	313.1	404120		672485	205346	71876.1	1.81334e+06	2691682	6.19667e+06	4.60064e+06	1.78096e+07	872284		2.46092e+06	583460	117851		8.84062e+06
FALSE		High	Unambiguous	MVDAMEDLR	[-].MVDAMEDLR.[A]	1xMet-loss+Acetyl [N-Term]	1xMet-loss+Acetyl [N-Term]	0.000102782	5.15092e-05	1.229	1	5	4	731365305	731365305 [1-9]	731365305 1xMet-loss+Acetyl [N-Term]	731365305 1xMet-loss+Acetyl [N-Term]	PREDICTED: ubiquitin carboxyl-terminal hydrolase 14 isoform X1 [Beta vulgaris subsp. vulgaris]	731365305; 731365311; 731365309; 731365307; 731365313	0	990.456	9	48.8		155.3	180.3			115.8	174.4	179.5	146.1	122160		229484	343014			284981	470744	566967	789684	263680		839785	974623
FALSE		High	Unambiguous	MVCPPVNKEDGRLPR	[R].MVCPPVNKEDGRLPR.[K]	1xCarbamidomethyl [C3]	1xCarbamidomethyl [C3]	3.50524e-05	5.15092e-05	1.371	1	1	6	731331688	731331688 [13-27]			PREDICTED: uncharacterized protein LOC104892530 [Beta vulgaris subsp. vulgaris]	731331688	2	1767.9	15		29.8				435.2	185.2		97.8	252		460996				3.62345e+06	3421788		2.32024e+06	10229490		1.20975e+06					1.76655e+07
FALSE		High	Unambiguous	MVASEDIGRQILTYGER	[R].MVASEDIGRQILTYGER.[K]			5.86428e-06	5.15092e-05	1.607	1	2	5	731354052	731354052 [437-453]			PREDICTED: mitochondrial-processing peptidase subunit alpha isoform X1 [Beta vulgaris subsp. vulgaris]	731354054; 731354052	1	1937.97	17			7.8			43.8	282.7	394.5	125.6	145.6			114419			482840	6.91104e+06	1.05772e+07	3.94157e+06	7.81864e+06			418711				2.35401e+06
FALSE		High	Unambiguous	MVASEDIGR	[R].MVASEDIGR.[Q]			0.000340161	5.15092e-05	1.071	1	2	6	731354052	731354052 [437-445]			PREDICTED: mitochondrial-processing peptidase subunit alpha isoform X1 [Beta vulgaris subsp. vulgaris]	731354054; 731354052	0	977.472	9	56.6	1.4	214.3	110.3	22.1	45.3	116.3	170.3	144.4	118.9	5.90109e+06	123953	1.31754e+07	8.73701e+06	3.03003e+06	2.09225e+06	1.19178e+07	1.91334e+07	1.89875e+07	2.67461e+07	1.27374e+07	325280	4.82147e+07	2.48249e+07	4.96817e+06		1.02004e+07
FALSE		High	Unambiguous	ANAQKADLSDGHWK	[K].ANAQKADLSDGHWK.[I]	1xGG [K14]	1xGG [K14]	0.044602	0.00105561	0.421	1	1	1	731327886	731327886 [557-570]			PREDICTED: putative UDP-glucuronate:xylan alpha-glucuronosyltransferase 4 [Beta vulgaris subsp. vulgaris]	731327886	1	1654.79	14
FALSE		High	Unambiguous	MVDFVADYYKNIENFPVLSQVQPGYLR	[K].MVDFVADYYKNIENFPVLSQVQPGYLR.[D]			8.69581e-06	5.15092e-05	1.555	1	2	2	731347037	731347037 [23-49]			PREDICTED: tyrosine decarboxylase 1 isoform X1 [Beta vulgaris subsp. vulgaris]	731347039; 731347037	1	3205.6	27							453.9	189.7	56.9	299.5							1.22006e+06	559314	196391	1.76816e+06
FALSE		High	Unambiguous	MVALFDHEEIGSNSAQGAGSPVMLDAISR	[R].MVALFDHEEIGSNSAQGAGSPVMLDAISR.[V]			2.78612e-09	5.15092e-05	2.617	1	1	4	731327772	731327772 [304-332]			PREDICTED: probable aspartyl aminopeptidase [Beta vulgaris subsp. vulgaris]	731327772	0	3002.43	29			23.4		9.2		316.6	227.1	182	241.7			87786.3		77066.3		1.98321e+06	1.5597e+06	1.4631e+06	3.32567e+06			321249		126361
FALSE		High	Unambiguous	MVAFQNDWDPISQAIHR	[K].MVAFQNDWDPISQAIHR.[A]			0.000474677	5.15092e-05	1.027	1	1	2	1108975637	1108975637 [236-252]			PREDICTED: ribosome-inactivating protein PD-L3/PD-L4-like isoform X1 [Beta vulgaris subsp. vulgaris]	1108975637	0	2027.98	17			3.4			212.4	258.2		178.3	347.7			13185.2			622546	1.6797e+06		1489062	4.96823e+06			48250.3				3.03512e+06
FALSE		High	Unambiguous	MVAELPEGGVVLLENVR	[K].MVAELPEGGVVLLENVR.[F]	1xOxidation [M1]	1xOxidation [M1]	1.83992e-06	5.15092e-05	1.76	1	1	13	731318922	731318922 [106-122]			PREDICTED: phosphoglycerate kinase 3, cytosolic [Beta vulgaris subsp. vulgaris]	731318922	0	1840.98	17	6.6	92.4	19	222.1	269.9	61.9	42.6	93	44.1	148.4	157287	1.80261e+06	265380	3.99924e+06	8.42369e+06	649988	991521	2.37521e+06	1.31834e+06	7.59246e+06	339501	4.73045e+06	971141	1.13632e+07	1.38118e+07		3.16891e+06
FALSE		High	Unambiguous	MVAELPEGGVVLLENVR	[K].MVAELPEGGVVLLENVR.[F]			1.23934e-08	5.15092e-05	2.42	1	1	32	731318922	731318922 [106-122]			PREDICTED: phosphoglycerate kinase 3, cytosolic [Beta vulgaris subsp. vulgaris]	731318922	0	1824.99	17	90.7	231.2	64.9	107.7	353.3	28.1	20.4	54.7	19.2	29.8	1.86299e+07	3.90412e+07	7.86125e+06	1.68007e+07	9.54973e+07	2.5583e+06	4.10852e+06	1.2107e+07	4.98098e+06	1.3197e+07	4.02121e+07	1.02452e+08	2.87678e+07	4.77366e+07	1.56581e+08		1.24726e+07
FALSE		High	Unambiguous	MVAAGAEHSAAVTEAGEVYGWGWGR	[K].MVAAGAEHSAAVTEAGEVYGWGWGR.[Y]			4.92649e-06	5.15092e-05	1.63	1	1	3	731366427	731366427 [186-210]			PREDICTED: ultraviolet-B receptor UVR8 [Beta vulgaris subsp. vulgaris]	731366427	0	2562.18	25		226.6		62.1		195.9	112.5	102	103.8	197.2		1.38673e+06		350920		645162	822402	817926	973526	3.16656e+06		3.63909e+06		997088			3.14538e+06
FALSE		High	Unambiguous	MTVTHLASAGRGPNSEDQATRK	[R].MTVTHLASAGRGPNSEDQATRK.[I]			3.34563e-07	5.15092e-05	1.985	2	2	2	731333018; 731333021	731333018 [139-160]; 731333021 [152-173]			PREDICTED: UBP1-associated protein 2C [Beta vulgaris subsp. vulgaris] PREDICTED: UBP1-associated protein 2C [Beta vulgaris subsp. vulgaris]	731333018; 731333021	2	2327.15	22						341.6	147	165.7	176	169.7						1.30366e+06	1245576	1.53923e+06	1.91406e+06	3.15768e+06							6.35579e+06
FALSE		High	Unambiguous	MTVTHLASAGRGPNSEDQATR	[R].MTVTHLASAGRGPNSEDQATR.[K]			5.07213e-08	5.15092e-05	2.234	2	2	8	731333018; 731333021	731333018 [139-159]; 731333021 [152-172]			PREDICTED: UBP1-associated protein 2C [Beta vulgaris subsp. vulgaris] PREDICTED: UBP1-associated protein 2C [Beta vulgaris subsp. vulgaris]	731333018; 731333021	1	2199.06	21			5.4			370.2	117.9	133.7	214.2	158.6			113321			5.8394e+06	4.12732e+06	5.13591e+06	9.6274e+06	1.21945e+07			414691				2.8469e+07
FALSE		High	Unambiguous	MTVTHLASAGR	[R].MTVTHLASAGR.[G]			4.63933e-05	5.15092e-05	1.334	2	2	9	731333018; 731333021	731333018 [139-149]; 731333021 [152-162]			PREDICTED: UBP1-associated protein 2C [Beta vulgaris subsp. vulgaris] PREDICTED: UBP1-associated protein 2C [Beta vulgaris subsp. vulgaris]	731333018; 731333021	0	1143.59	11	103.6	73.6	398.3	108.9		15	46.2	43.1	121.3	90.2	2.55344e+06	1.4927e+06	5.7923e+06	2.0393e+06		163427	1.1187e+06	1.14479e+06	3.77171e+06	4.79783e+06	5.51155e+06	3.91716e+06	2.11966e+07	5.79436e+06			796762
FALSE		High	Unambiguous	MVAHHSSLQIYTR	[K].MVAHHSSLQIYTR.[S]			1.14959e-07	5.15092e-05	2.126	1	1	17	731358621	731358621 [91-103]			PREDICTED: 40S ribosomal protein S25 [Beta vulgaris subsp. vulgaris]	731358621	0	1542.78	13	243.2	315.6	71.5	97.1	0.7	49.2	96.1	37.7	51.5	37.5	1.16423e+07	1.24275e+07	2.01792e+06	3.53353e+06	44084.5	1.04224e+06	4.52043e+06	1.94728e+06	3.11076e+06	3.87491e+06	2.51296e+07	3.26124e+07	7.38447e+06	1.004e+07	72282.8		5.08125e+06
FALSE		High	Unambiguous	MTVSSGEISISSSDSKSALVK	[-].MTVSSGEISISSSDSKSALVK.[L]	1xMet-loss [N-Term]	1xMet-loss [N-Term]	5.86747e-05	5.15092e-05	1.303	1	1	2	731367587	731367587 [1-21]	731367587 1xMet-loss [N-Term]	731367587 1xMet-loss [N-Term]	PREDICTED: haloacid dehalogenase-like hydrolase domain-containing protein Sgpp isoform X2 [Beta vulgaris subsp. vulgaris]	731367587	1	1982.03	21			20.4	132.5		43.2	145.6	444.6	48.9	164.9			53366.9	447434		85090.3	635788	2.12946e+06	273953	1.58171e+06			195293	1.27132e+06			414843
FALSE		High	Unambiguous	MVDIDFQIPAALDPFAEAESGAPGVKEYVHIR	[-].MVDIDFQIPAALDPFAEAESGAPGVKEYVHIR.[I]	1xMet-loss+Acetyl [N-Term]	1xMet-loss+Acetyl [N-Term]	2.25884e-05	5.15092e-05	1.429	1	1	2	731329669	731329669 [1-32]	731329669 1xMet-loss+Acetyl [N-Term]	731329669 1xMet-loss+Acetyl [N-Term]	PREDICTED: protein translation factor SUI1 homolog [Beta vulgaris subsp. vulgaris]	731329669	1	3396.71	32						250.3		400.5	230.4	118.9						322564		1.25641e+06	845828	746933							1.5726e+06
FALSE		High	Unambiguous	MVDPALEGLYPVK	[K].MVDPALEGLYPVK.[S]			4.71016e-05	5.15092e-05	1.332	1	1	2	731347853	731347853 [634-646]			PREDICTED: protein STRUBBELIG-RECEPTOR FAMILY 7 [Beta vulgaris subsp. vulgaris]	731347853	0	1431.76	13	55.9	8.9	123.5		13	58.6	290		294.1	156.1	172576	22527.3	224880		52956.3	80016.3	879528		1144911	1.0399e+06	372501	59116.5	822935		86829.4		390106
FALSE		High	Unambiguous	LLTTLEATSPSSK	[R].LLTTLEATSPSSK.[K]	2xGG [S/T]	2xGG [T3; T4; T8; S12]	0.0590228	0.00129303	0.382	1	1	2	731349316	731349316 [398-410]			PREDICTED: pentatricopeptide repeat-containing protein At2g30100, chloroplastic [Beta vulgaris subsp. vulgaris]	731349316	0	1575.82	13
FALSE		High	Unambiguous	MVKDIEVGGGER	[-].MVKDIEVGGGER.[R]	1xMet-loss [N-Term]	1xMet-loss [N-Term]	0.0003988	5.15092e-05	1.05	1	1	1	731345789	731345789 [1-12]	731345789 1xMet-loss [N-Term]	731345789 1xMet-loss [N-Term]	PREDICTED: aquaporin PIP2-1 [Beta vulgaris subsp. vulgaris]	731345789	1	1158.61	12			597.6	402.4									605872	525378									2.21715e+06	1.49278e+06
FALSE		High	Unambiguous	MVKAVENQVGDNYYRPDLKQAALAR	[R].MVKAVENQVGDNYYRPDLKQAALAR.[L]			8.49545e-07	5.15092e-05	1.862	1	1	1	731357196	731357196 [96-120]			PREDICTED: 60S ribosomal protein L28-1 [Beta vulgaris subsp. vulgaris]	731357196	2	2849.47	25										1000										3034391
FALSE		High	Unambiguous	MVHNGIEYGDMQLISEAYDVLK	[K].MVHNGIEYGDMQLISEAYDVLK.[N]	1xOxidation [M]	1xOxidation [M1; M11]	3.17282e-07	5.15092e-05	1.992	1	1	4	731332004	731332004 [276-297]			PREDICTED: 6-phosphogluconate dehydrogenase, decarboxylating 2, chloroplastic [Beta vulgaris subsp. vulgaris]	731332004	0	2541.2	22				20.1	749.8	86.9	40.9	19.3	34.4	48.6				124970	8.08564e+06	315196	329203	170195	354951	859564				355083	1.32576e+07		1.53669e+06
FALSE		High	Unambiguous	MVHNGIEYGDMQLISEAYDVLK	[K].MVHNGIEYGDMQLISEAYDVLK.[N]			1.81118e-07	5.15092e-05	2.066	1	1	28	731332004	731332004 [276-297]			PREDICTED: 6-phosphogluconate dehydrogenase, decarboxylating 2, chloroplastic [Beta vulgaris subsp. vulgaris]	731332004	0	2525.21	22	141	165.8	100.4	122.1	18.6	129.3	79.1	62.2	102.7	78.7	2.15223e+07	2.08099e+07	9.04185e+06	1.41497e+07	3.73761e+06	8.73887e+06	1.18688e+07	1.02348e+07	1.97631e+07	2.59182e+07	4.64553e+07	5.46097e+07	3.30881e+07	4.02043e+07	6.12834e+06		4.26049e+07
FALSE		High	Unambiguous	MVHNGIEYGDMQLIAEAYDVLK	[K].MVHNGIEYGDMQLIAEAYDVLK.[S]			5.14654e-09	5.15092e-05	2.536	1	1	23	731340274	731340274 [188-209]			PREDICTED: 6-phosphogluconate dehydrogenase, decarboxylating 1 [Beta vulgaris subsp. vulgaris]	731340274	0	2509.21	22	163.5	74.9	91.8	5.9	3.5	235	164.8	100.1	114.4	46.2	2.59213e+07	9.76646e+06	8.58582e+06	712229	729258	1.64934e+07	2.5673e+07	1.70979e+07	2.28727e+07	1.58097e+07	5.59506e+07	2.56293e+07	3.14193e+07	2.02369e+06	1.19572e+06		8.04107e+07
FALSE		High	Unambiguous	MVGYALKAAEILAEEGISAEVVNLR	[K].MVGYALKAAEILAEEGISAEVVNLR.[S]			7.22885e-11	5.15092e-05	3.099	1	1	16	731334617	731334617 [249-273]			PREDICTED: pyruvate dehydrogenase E1 component subunit beta-1, mitochondrial [Beta vulgaris subsp. vulgaris]	731334617	1	2646.42	25		14.4		58.5		76	277.2	442.3	100.9	30.9		588601		2.21302e+06		1.67574e+06	13574886	2.37558e+07	6.33872e+06	3.31943e+06		1.54462e+06		6.28797e+06			8.1698e+06
FALSE		High	Unambiguous	MVDMQGNWIKLEQK	[-].MVDMQGNWIKLEQK.[G]	1xMet-loss+Acetyl [N-Term]	1xMet-loss+Acetyl [N-Term]	1.25024e-06	5.15092e-05	1.811	1	1	2	731355711	731355711 [1-14]	731355711 1xMet-loss+Acetyl [N-Term]	731355711 1xMet-loss+Acetyl [N-Term]	PREDICTED: nitrile-specifier protein 5 [Beta vulgaris subsp. vulgaris]	731355711	1	1630.83	14			14.2			21.4	215	177.6	340.6	231.3			44462.7			50195	1.12129e+06	1.01556e+06	2.27954e+06	2.64921e+06			162709				244717
FALSE		High	Unambiguous	MVGQTADLEVLSLLPPYEGK	[-].MVGQTADLEVLSLLPPYEGK.[S]	1xMet-loss [N-Term]	1xMet-loss [N-Term]	1.37802e-08	5.15092e-05	2.406	1	1	12	731332700	731332700 [1-20]	731332700 1xMet-loss [N-Term]	731332700 1xMet-loss [N-Term]	PREDICTED: phosphoethanolamine N-methyltransferase [Beta vulgaris subsp. vulgaris]	731332700	0	2029.09	20		70.2	83.2		34.7	48	270.9	277.8	118.5	96.6		1.46841e+06	1.24766e+06		1.16251e+06	539741	6.76708e+06	7.60973e+06	3.79716e+06	5301425		3.85343e+06	4.56572e+06		1.9061e+06		2.63141e+06
FALSE		High	Unambiguous	MVGPEEAEDFCDAFQR	[R].MVGPEEAEDFCDAFQR.[I]	1xCarbamidomethyl [C11]	1xCarbamidomethyl [C11]	3.98705e-05	5.15092e-05	1.354	1	2	1	731325973	731325973 [73-88]			PREDICTED: uncharacterized protein LOC104890114 isoform X2 [Beta vulgaris subsp. vulgaris]	731325971; 731325973	0	1900.78	16				83.4		27	196.3	467.6	225.6					217451		41088	662210	1.72969e+06	976574					617855			200317
FALSE		High	Unambiguous	MVGHYWLR	[R].MVGHYWLR.[N]			0.00202957	5.15092e-05	0.835	1	1	10	731312550	731312550 [142-149]			PREDICTED: glucose-6-phosphate isomerase 1, chloroplastic [Beta vulgaris subsp. vulgaris]	731312550	0	1061.53	8	344.1	289.5	2.1	10.9	6.3	83.9	83	34.3	34.4	111.3	3.2461e+06	2.24601e+06	11760.3	78344.9	78784.4	350437	769273	349163	409524	2.26582e+06	7.00662e+06	5.89402e+06	43036.2	222606	129178		1.7085e+06
FALSE		High	Unambiguous	MVGHFHTK	[K].MVGHFHTK.[G]			0.00128926	5.15092e-05	0.895	1	1	11	1108898346	1108898346 [163-170]			PREDICTED: major allergen Mal d 1 [Beta vulgaris subsp. vulgaris]	1108898346	0	956.477	8	240	491.3	101.8	149.2		8.5	1.8	0.8	2.4	4.2	1.24569e+07	2.09772e+07	3.11524e+06	5.88454e+06		195268	92099.3	45193.4	158515	465047	2.6888e+07	5.50487e+07	1.14e+07	1.67201e+07			951998
FALSE		High	Unambiguous	MVGENTEAVGAGVGGGTTGNK	[R].MVGENTEAVGAGVGGGTTGNK.[M]			3.6662e-06	5.15092e-05	1.669	1	1	3	731334686	731334686 [231-251]			PREDICTED: ATP-dependent Clp protease ATP-binding subunit ClpA homolog CD4B, chloroplastic [Beta vulgaris subsp. vulgaris]	731334686	0	1905.9	21	154.8		521.5	323.7							360539		716612	572842							778215		2.6224e+06	1.62765e+06
FALSE		High	Unambiguous	MVFAQANITR	[R].MVFAQANITR.[D]			7.70717e-05	5.15092e-05	1.267	1	1	6	731348866	731348866 [608-617]			PREDICTED: protein TOC75-3, chloroplastic [Beta vulgaris subsp. vulgaris]	731348866	0	1150.6	10	2.3	18.5	56.7	104.5		51.5	201.4	166.6	125.5	273	59325.5	388487	855124	2.02841e+06		582514	5055873	4.588e+06	4044664	1.5056e+07	128053	1.01947e+06	3.12928e+06	5.76344e+06			2.83995e+06
FALSE		High	Unambiguous	MVEEKAFIAKDVTELIGNTPLVYLNNVVDGCVAR	[-].MVEEKAFIAKDVTELIGNTPLVYLNNVVDGCVAR.[V]	1xCarbamidomethyl [C31]; 1xMet-loss+Acetyl [N-Term]	1xCarbamidomethyl [C31]; 1xMet-loss+Acetyl [N-Term]	5.77272e-07	5.15092e-05	1.913	1	1	2	731328154	731328154 [1-34]	731328154 1xMet-loss+Acetyl [N-Term]	731328154 1xMet-loss+Acetyl [N-Term]	PREDICTED: cysteine synthase [Beta vulgaris subsp. vulgaris]	731328154	2	3688.93	34		86.9				270.4	123.6	519.1				276251				462988	469650	2163573				724942					2.25722e+06
FALSE		High	Unambiguous	MVEDVPLVIPEVNPEAMAHIK	[R].MVEDVPLVIPEVNPEAMAHIK.[V]			6.52047e-06	5.15092e-05	1.593	1	1	5	731354929	731354929 [147-167]			PREDICTED: uncharacterized protein LOC104902692 [Beta vulgaris subsp. vulgaris]	731354929	0	2331.21	21	60	30.8		80.4	41.5	36.3	132.2	223.3	163	232.6	2.4913e+06	1.05133e+06		2538034	2.27114e+06	666726	5.39438e+06	9.99351e+06	8.53734e+06	2.08563e+07	5.37742e+06	2.75893e+06		7.21145e+06	3.72386e+06		3.25051e+06
FALSE		High	Unambiguous	MVGQKLPTVNKPSRSDEVVDPEQQLR	[-].MVGQKLPTVNKPSRSDEVVDPEQQLR.[I]	1xMet-loss [N-Term]	1xMet-loss [N-Term]	7.08302e-07	5.15092e-05	1.886	1	4	7	731336992	731336992 [1-26]	731336992 1xMet-loss [N-Term]	731336992 1xMet-loss [N-Term]	PREDICTED: uncharacterized protein LOC104894892 isoform X2 [Beta vulgaris subsp. vulgaris]	731336996; 731336994; 731336990; 731336992	2	2819.5	26						74.6	308.1	86.8	105.3	425.1						294285	2.6976e+06	833441	1.1833e+06	8.17437e+06							1.43474e+06
FALSE		High	Unambiguous	MTVSSGEISISSSDSK	[-].MTVSSGEISISSSDSK.[S]	1xMet-loss [N-Term]	1xMet-loss [N-Term]	5.22819e-08	5.15092e-05	2.23	1	1	4	731367587	731367587 [1-16]	731367587 1xMet-loss [N-Term]	731367587 1xMet-loss [N-Term]	PREDICTED: haloacid dehalogenase-like hydrolase domain-containing protein Sgpp isoform X2 [Beta vulgaris subsp. vulgaris]	731367587	0	1483.71	16	26.9		113.8	65.3		79.4	154.3	251.3	137.8	171.2	617114		1.54003e+06	1.13896e+06		806626	3.47831e+06	6.21457e+06	3988509	8.47804e+06	1.33202e+06		5.63564e+06	3.23619e+06			3.93257e+06
FALSE		High	Unambiguous	MTVEYENCK	[K].MTVEYENCK.[L]	1xCarbamidomethyl [C8]	1xCarbamidomethyl [C8]	0.00119531	5.15092e-05	0.905	1	1	5	731322356	731322356 [271-279]			PREDICTED: ruBisCO large subunit-binding protein subunit beta, chloroplastic [Beta vulgaris subsp. vulgaris]	731322356	0	1173.49	9	119.6	6.2	393.8	199.1	10.4	34.3	58.2		105.8	72.7	1.64243e+06	69991.4	3.18929e+06	2.07687e+06	187818	208397	785075		1.83194e+06	2.15585e+06	3.54515e+06	183672	1.1671e+07	5.90111e+06	307954		1.016e+06
FALSE		High	Unambiguous	MTVDIDAMAAR	[-].MTVDIDAMAAR.[L]	1xMet-loss [N-Term]	1xMet-loss [N-Term]	0.000231167	5.15092e-05	1.122	1	1	13	731328793	731328793 [1-11]	731328793 1xMet-loss [N-Term]	731328793 1xMet-loss [N-Term]	PREDICTED: eukaryotic translation initiation factor 3 subunit B [Beta vulgaris subsp. vulgaris]	731328793	0	1062.52	11	2.7	2.3	54.7	108.2	30.1	69.6	155.4	213.7	136.8	226.6	70160.1	47910.9	825461	2.10492e+06	1.0128e+06	788434	3.90824e+06	5.89638e+06	4.41655e+06	1.25195e+07	151439	125728	3.02072e+06	5.98081e+06	1.66062e+06		3.84388e+06
FALSE		High	Unambiguous	MTIGSGGSSVVVPR	[-].MTIGSGGSSVVVPR.[N]	1xMet-loss [N-Term]	1xMet-loss [N-Term]	4.42812e-07	5.15092e-05	1.948	1	1	34	731377923	731377923 [1-14]	731377923 1xMet-loss [N-Term]	731377923 1xMet-loss [N-Term]	PREDICTED: ubiquitin-conjugating enzyme E2 variant 1D [Beta vulgaris subsp. vulgaris]	731377923	0	1215.67	14	41.7	19.5	90.1	41.9	25.9	105.3	201.3	156.3	168.1	150	1.05486e+07	4.05359e+06	1.34265e+07	8.03978e+06	8.61702e+06	1.17803e+07	4.99849e+07	4.25595e+07	5.35911e+07	8.17976e+07	2.2769e+07	1.06375e+07	4.91336e+07	2.28438e+07	1.41288e+07		5.74329e+07
FALSE		High	Unambiguous	MTIGSGGSSIVVPR	[-].MTIGSGGSSIVVPR.[N]	1xMet-loss [N-Term]	1xMet-loss [N-Term]	1.18496e-07	5.15092e-05	2.122	1	1	15	731348284	731348284 [1-14]	731348284 1xMet-loss [N-Term]	731348284 1xMet-loss [N-Term]	PREDICTED: ubiquitin-conjugating enzyme E2 variant 1D [Beta vulgaris subsp. vulgaris]	731348284	0	1229.68	14	10.6	36.5			8.1	22.3	439.4	198.1	157.4	127.5	437743	1.23959e+06			441031	406447	1.78122e+07	8.80682e+06	8.19035e+06	1.1356e+07	944857	3.25296e+06			723133		1.98156e+06
FALSE		High	Unambiguous	MTLEEKIGQMVQIER	[R].MTLEEKIGQMVQIER.[KS]			9.16942e-06	5.15092e-05	1.548	2	2	2	731348444; 731333622	731348444 [46-60]; 731333622 [47-61]			PREDICTED: uncharacterized protein LOC104899896 [Beta vulgaris subsp. vulgaris] PREDICTED: uncharacterized protein LOC104893418 [Beta vulgaris subsp. vulgaris]	731348444; 731333622	1	1804.93	15		32.2	15.8	414.6	4	5.7	274.9	19.7		233.2		137312	48299.4	1.63056e+06	27053.9	13075.1	1.39856e+06	109796		2.60572e+06		360336	176749	4.63298e+06	44358.7		63745.3
FALSE		High	Unambiguous	MTIDHAELTTDQVLKR	[-].MTIDHAELTTDQVLKR.[D]	1xMet-loss+Acetyl [N-Term]	1xMet-loss+Acetyl [N-Term]	0.000423708	5.15092e-05	1.042	1	1	1	731326131	731326131 [1-16]	731326131 1xMet-loss+Acetyl [N-Term]	731326131 1xMet-loss+Acetyl [N-Term]	PREDICTED: V-type proton ATPase subunit H [Beta vulgaris subsp. vulgaris]	731326131	1	1781.94	16			118.5	432.8						448.8			149874	705155						2077697			548453	2.00359e+06
FALSE		High	Unambiguous	MTIDHAELTTDQVLKR	[-].MTIDHAELTTDQVLKR.[D]	1xMet-loss [N-Term]	1xMet-loss [N-Term]	2.65918e-11	5.15092e-05	3.231	1	1	18	731326131	731326131 [1-16]	731326131 1xMet-loss [N-Term]	731326131 1xMet-loss [N-Term]	PREDICTED: V-type proton ATPase subunit H [Beta vulgaris subsp. vulgaris]	731326131	1	1739.93	16	13.3	67.1	0.8	8.6	0.8	243.9	208.2	145.6	103.2	208.4	478503	1.9806e+06	15900.4	235892	39788.5	3.87763e+06	7.34763e+06	5.63307e+06	4.67265e+06	1.61521e+07	1.03284e+06	5.19752e+06	58186.6	670253	65238.9		1.89047e+07
FALSE		High	Unambiguous	MTLDFHTNKK	[RK].MTLDFHTNKK.[V]			0.000148978	5.15092e-05	1.18	1	2	8	731366450	731366450 [24-33]			PREDICTED: 40S ribosomal protein S17 [Beta vulgaris subsp. vulgaris]	731366450; 731344855	1	1234.62	10	117.2	327.6	10.9	80.8	281.9	34.8	36.7	57.4	39.8	12.9	6.02321e+06	1.38454e+07	331035	3.15619e+06	19073694	790720	1.85193e+06	3180551	2.5792e+06	1.42999e+06	1.3001e+07	3.63333e+07	1.2114e+06	8.96785e+06	3.1274e+07		3.85502e+06
FALSE		High	Unambiguous	MTLDFHTNK	[RK].MTLDFHTNK.[K]			0.000959785	5.15092e-05	0.934	1	2	2	731366450	731366450 [24-32]			PREDICTED: 40S ribosomal protein S17 [Beta vulgaris subsp. vulgaris]	731366450; 731344855	0	1106.53	9		123.1	231.7	93.4		191	82.4	88.9	155.4	34.2		883819	1.19301e+06	619464		738078	706501	835992	1.71125e+06	645387		2.31933e+06	4.36576e+06	1.76011e+06			3.59837e+06
FALSE		High	Unambiguous	MTILHAISLLAPVLGSEITCSK	[R].MTILHAISLLAPVLGSEITCSK.[L]	1xCarbamidomethyl [C20]	1xCarbamidomethyl [C20]	3.12327e-08	5.15092e-05	2.298	1	1	11	731340802	731340802 [493-514]			PREDICTED: serine/threonine-protein phosphatase 2A 65 kDa regulatory subunit A beta isoform [Beta vulgaris subsp. vulgaris]	731340802	0	2354.28	22	448.3	225.2	113.1	81.8	117.1	5.1	0.8	3.2	4.7	0.7	29526081	1.21968e+07	4.39514e+06	4.09106e+06	1.01522e+07	148963	51585.9	229362	387867	99862.6	6.37313e+07	3.20071e+07	1.60837e+07	1.16241e+07	1.6646e+07		726243
FALSE		High	Unambiguous	MTLADDVNLEEFVMTKDEFSGADIK	[R].MTLADDVNLEEFVMTKDEFSGADIK.[A]			7.97239e-12	5.15092e-05	3.39	1	2	6	731347442	731347442 [377-401]			PREDICTED: 26S proteasome regulatory subunit 4 homolog A [Beta vulgaris subsp. vulgaris]	731347598; 731347442	1	2818.32	25	90.3	221.8	29.7	43.5	26.5	175.3	44.8	135.9	71.9	160.4	2.26589e+06	4.57867e+06	439353	828947	875888	1948561	1104831	3.67583e+06	2.27644e+06	8.69131e+06	4.89087e+06	1.20154e+07	1.60779e+06	2.35533e+06	1.43614e+06		9.49988e+06
FALSE		High	Unambiguous	MTKDVEAVSEQQQPEFSTK	[-].MTKDVEAVSEQQQPEFSTK.[D]	1xMet-loss [N-Term]	1xMet-loss [N-Term]	1.60442e-07	5.15092e-05	2.082	1	1	51	733214085	733214085 [1-19]	733214085 1xMet-loss [N-Term]	733214085 1xMet-loss [N-Term]	aquaporin PIP2-1 [Beta vulgaris subsp. vulgaris]	733214085	1	2050.99	19	129.8	46.1	169.2	180.4	48.3	83.4	93.1	70.7	86.2	92.8	2.10665e+07	6.15169e+06	1.61979e+07	2.22435e+07	1.03303e+07	5.99604e+06	1.48487e+07	1.23664e+07	1.76442e+07	3.25008e+07	4.54715e+07	1.61434e+07	5.92751e+07	6.32015e+07	1.69379e+07		2.92327e+07
FALSE		High	Unambiguous	QLLTIQEEKELIK	[K].QLLTIQEEKELIK.[E]	1xGG [K9]	1xGG [K9]	0.0745408	0.00157116	0.349	1	1	2	731345779	731345779 [251-263]			PREDICTED: RNA polymerase sigma factor sigF, chloroplastic [Beta vulgaris subsp. vulgaris]	731345779	1	1698.96	13
FALSE		High	Unambiguous	MTGSLDKSFEAAPR	[K].MTGSLDKSFEAAPR.[T]			1.15093e-05	5.15092e-05	1.518	1	1	3	731335384	731335384 [69-82]			PREDICTED: LIM domain-containing protein WLIM1-like [Beta vulgaris subsp. vulgaris]	731335384	1	1509.74	14	4.5		10.1	15.1		27.6	230.6	328.7	220.9	162.5	24885.6		33253.9	63819.5		68185.1	1.26301e+06	1.97435e+06	1.55318e+06	1.95562e+06	53715		121690	181334			332425
FALSE		High	Unambiguous	MTGIGIMDPGVSVK	[R].MTGIGIMDPGVSVK.[G]			1.47699e-06	5.15092e-05	1.789	1	2	5	731321486	731321486 [138-151]			PREDICTED: RNA-binding protein 1 isoform X1 [Beta vulgaris subsp. vulgaris]	1108896138; 731321486	0	1404.72	14			40.7	123.4	10.5	40.8	52.7	261.1	259.2	211.6			466320	1.82003e+06	268283	350416	1.00614e+06	5.46285e+06	6.34834e+06	8.86866e+06			1.70647e+06	5.17136e+06	439888		1.70839e+06
FALSE		High	Unambiguous	MTEVASSVVHEVLGKR	[-].MTEVASSVVHEVLGKR.[A]	1xMet-loss+Acetyl [N-Term]	1xMet-loss+Acetyl [N-Term]	1.10491e-10	5.15092e-05	3.043	1	1	5	731331784	731331784 [1-16]	731331784 1xMet-loss+Acetyl [N-Term]	731331784 1xMet-loss+Acetyl [N-Term]	PREDICTED: ABC transporter F family member 3 [Beta vulgaris subsp. vulgaris]	731331784	1	1652.9	16						78.7	371.9	214.3	166.1	169						407498	4273078	2.70107e+06	2.44936e+06	4.26511e+06							1.98669e+06
FALSE		High	Unambiguous	MTEVASSVVHEVLGK	[-].MTEVASSVVHEVLGK.[R]	1xMet-loss+Acetyl [N-Term]	1xMet-loss+Acetyl [N-Term]	7.47712e-05	5.15092e-05	1.271	1	1	2	731331784	731331784 [1-15]	731331784 1xMet-loss+Acetyl [N-Term]	731331784 1xMet-loss+Acetyl [N-Term]	PREDICTED: ABC transporter F family member 3 [Beta vulgaris subsp. vulgaris]	731331784	0	1496.8	15				69.6			391.4	212.6	71.2	255.3				241084			1.75452e+06	1.04518e+06	409844	2.51377e+06				685005
FALSE		High	Unambiguous	MTENFVKEDFRQHLPR	[K].MTENFVKEDFRQHLPR.[F]			7.94011e-06	5.15092e-05	1.567	1	1	10	731325021	731325021 [220-235]			PREDICTED: probable aldo-keto reductase 2 [Beta vulgaris subsp. vulgaris]	731325021	2	2047.02	16	7.2	8.2			0.4	131.2	210.5	130.3	142.6	369.7	187961	174978			15074.9	1.51465e+06	5.39178e+06	3.65958e+06	4.6874e+06	2.08026e+07	405710	459179			24717.5		7.38442e+06
FALSE		High	Unambiguous	QLEDGRTLADYNVQKESTLHLVIR	[K].QLEDGRTLADYNVQKESTLHLVIR.[L]	1xGG [K15]	1xGG [K15]	0.0755931	0.00157116	0.347	1	1	1	731371854	731371854 [49-72]			PREDICTED: ubiquitin-60S ribosomal protein L40 [Beta vulgaris subsp. vulgaris]	731371854	2	2912.52	24
FALSE		High	Unambiguous	SLATNLRSSR	[R].SLATNLRSSR.[R]	1xGG [S1]	1xGG [S1]	0.0943839	0.00255791	0.315	1	1	1	1108907853	1108907853 [402-411]			PREDICTED: uncharacterized protein LOC104890385 [Beta vulgaris subsp. vulgaris]	1108907853	1	1218.65	10
FALSE		High	Unambiguous	MTLSEFASYGSSGGPVSSGSTR	[K].MTLSEFASYGSSGGPVSSGSTR.[L]			3.42053e-08	5.15092e-05	2.286	1	1	4	731342204	731342204 [55-76]			PREDICTED: eukaryotic translation initiation factor 4B1 [Beta vulgaris subsp. vulgaris]	731342204	0	2164.98	22			40.6	30.8		63.7	206.7	273.7	138.1	246.4			97320.9	94936.9		114606	824920	1.19779e+06	707048	2.1597e+06			356140	269749			558742
FALSE		High	Unambiguous	MTLYLKEDQLEYLEER	[K].MTLYLKEDQLEYLEER.[R]			5.30801e-08	5.15092e-05	2.228	1	1	11	731330156	731330156 [174-189]			PREDICTED: heat shock cognate protein 80 [Beta vulgaris subsp. vulgaris]	731330156	1	2073.02	16	267.7	255.2	15.1	106.9	163	90	13.5	28.7	17.2	42.6	2.23274e+07	1.75058e+07	742928	6.77355e+06	1.7901e+07	3.32382e+06	1.10947e+06	2.57896e+06	1.81112e+06	7.67643e+06	4.81932e+07	4.5939e+07	2.7187e+06	1.9246e+07	2.93512e+07		1.62047e+07
FALSE		High	Unambiguous	MTTVKFGLSELIDDLDANDDEGIDVIFVPR	[K].MTTVKFGLSELIDDLDANDDEGIDVIFVPR.[T]			1.93671e-09	5.15092e-05	2.665	1	1	7	731350564	731350564 [553-582]			PREDICTED: polyphenol oxidase, chloroplastic [Beta vulgaris subsp. vulgaris]	731350564	1	3337.65	30	129.4	22	21.8	46.4		34.2	204.9	232.2	183.9	125.2	2.61444e+06	366320	260351	711772		305602	4.06877e+06	5.05822e+06	4.68869e+06	5.46096e+06	5.64321e+06	961303	952739	2.02239e+06			1.48991e+06
FALSE		High	Unambiguous	MTTMNPFDLLGDNDNDDPSQLLESATAQLQK	[-].MTTMNPFDLLGDNDNDDPSQLLESATAQLQK.[I]	1xMet-loss+Acetyl [N-Term]	1xMet-loss+Acetyl [N-Term]	3.49917e-08	5.15092e-05	2.283	1	1	8	731360833	731360833 [1-31]	731360833 1xMet-loss+Acetyl [N-Term]	731360833 1xMet-loss+Acetyl [N-Term]	PREDICTED: RNA-binding protein FUS [Beta vulgaris subsp. vulgaris]	731360833	0	3333.54	31	82.9	9.1	73.1	81.6	129		131.9	276.2	147.6	68.7	4.55657e+06	413124	2.37184e+06	3.41076e+06	9338021		7127316	1.63687e+07	1.02346e+07	8.15285e+06	9.83524e+06	1.08413e+06	8.67962e+06	9.69118e+06	1.5311e+07
FALSE		High	Unambiguous	MTTKPLASNLSAPLPAATQPSR	[-].MTTKPLASNLSAPLPAATQPSR.[S]	1xMet-loss+Acetyl [N-Term]	1xMet-loss+Acetyl [N-Term]	2.38186e-05	5.15092e-05	1.422	1	1	2	731365688	731365688 [1-22]	731365688 1xMet-loss+Acetyl [N-Term]	731365688 1xMet-loss+Acetyl [N-Term]	PREDICTED: protein SIEVE ELEMENT OCCLUSION B [Beta vulgaris subsp. vulgaris]	731365688	0	2163.18	22							265	330.9	168.3	235.8							800237	1.09591e+06	652092	1.56359e+06
FALSE		High	Unambiguous	MTTFEDSEKESEYGYIRK	[R].MTTFEDSEKESEYGYIRK.[V]			1.28719e-08	5.15092e-05	2.415	1	1	9	733214846	733214846 [9-26]			V-type proton ATPase catalytic subunit A [Beta vulgaris subsp. vulgaris]	733214846	2	2213.01	18	7.2	91	45	76.2	28.2	84.5	194.5	210	114.2	149.2	218691	2.27166e+06	805437	1.7572e+06	1.12849e+06	1.13607e+06	5.80162e+06	6.86883e+06	4.37088e+06	9.77284e+06	472040	5.96133e+06	2.94745e+06	4.99282e+06	1.85032e+06		5.53873e+06
FALSE		High	Unambiguous	MTTFEDSEKESEYGYIR	[R].MTTFEDSEKESEYGYIR.[K]			1.13097e-09	5.15092e-05	2.736	1	1	37	733214846	733214846 [9-25]			V-type proton ATPase catalytic subunit A [Beta vulgaris subsp. vulgaris]	733214846	1	2084.91	17	57.5	75.1	6.7	55.3	158.9	106.1	99.1	122.5	71.8	247	5.70621e+06	6.13709e+06	390349	4.17504e+06	2.07708e+07	4.66328e+06	9.67398e+06	1.31126e+07	8.99204e+06	5.29352e+07	1.23167e+07	1.6105e+07	1.42846e+06	1.18628e+07	3.40567e+07		2.2735e+07
FALSE		High	Unambiguous	MTSTAGQVIRCK	[-].MTSTAGQVIRCK.[A]	1xCarbamidomethyl [C11]; 1xMet-loss+Acetyl [N-Term]	1xCarbamidomethyl [C11]; 1xMet-loss+Acetyl [N-Term]	4.36408e-06	5.15092e-05	1.646	1	1	1	731313356	731313356 [1-12]	731313356 1xMet-loss+Acetyl [N-Term]	731313356 1xMet-loss+Acetyl [N-Term]	PREDICTED: alcohol dehydrogenase 3 [Beta vulgaris subsp. vulgaris]	731313356	1	1262.65	12	161.4		35.5							803.1	262054		34015.7							2.81438e+06	565636		124478
FALSE		High	Unambiguous	MTSTAGQVIR	[-].MTSTAGQVIR.[C]	1xMet-loss+Acetyl [N-Term]	1xMet-loss+Acetyl [N-Term]	0.000180039	5.15092e-05	1.155	1	1	55	731313356	731313356 [1-10]	731313356 1xMet-loss+Acetyl [N-Term]	731313356 1xMet-loss+Acetyl [N-Term]	PREDICTED: alcohol dehydrogenase 3 [Beta vulgaris subsp. vulgaris]	731313356	0	974.527	10	45.1	12.7	192.5	82.3	87.4	42.4	120.6	166.6	110.6	139.8	3.18696e+07	7.3964e+06	8.02383e+07	4.41925e+07	8.12947e+07	1.32659e+07	8.37406e+07	1.26907e+08	9.86178e+07	2.13246e+08	6.87898e+07	1.94097e+07	2.93627e+08	1.25567e+08	1.33294e+08		6.46757e+07
FALSE		High	Unambiguous	MTSFQWATDANPLSLTPK	[-].MTSFQWATDANPLSLTPK.[F]	1xMet-loss+Acetyl [N-Term]	1xMet-loss+Acetyl [N-Term]	0.000515909	5.15092e-05	1.016	1	1	2	731319974	731319974 [1-18]	731319974 1xMet-loss+Acetyl [N-Term]	731319974 1xMet-loss+Acetyl [N-Term]	PREDICTED: protein DOWNY MILDEW RESISTANCE 6 [Beta vulgaris subsp. vulgaris]	731319974	0	1918.95	18				62.9			133.1	374.6	136.6	292.9				93356.5			255473	788642	336601	1235080				265259
FALSE		High	Unambiguous	MTSESGFGFLANR	[-].MTSESGFGFLANR.[A]	1xMet-loss+Acetyl [N-Term]	1xMet-loss+Acetyl [N-Term]	0.000137067	5.15092e-05	1.191	1	2	3	731351443	731351443 [1-13]	731351443 1xMet-loss+Acetyl [N-Term]	731351443 1xMet-loss+Acetyl [N-Term]	PREDICTED: putative D-cysteine desulfhydrase 1, mitochondrial isoform X1 [Beta vulgaris subsp. vulgaris]	1108963150; 731351443	0	1327.63	13		8		40.3	13	357.8	99.6	219.6	126.4	135.3		58320.2		270825	151495	1.40275e+06	867165	2.09598e+06	1.4117e+06	2.58594e+06		153045		769510	248398		6.83885e+06
FALSE		High	Unambiguous	MTQIMFETFNVPAMYVAIQAVLSLYASGR	[K].MTQIMFETFNVPAMYVAIQAVLSLYASGR.[T]			3.16538e-11	5.15092e-05	3.208	2	2	13	731311844; 731311848	731311844 [121-149]; 731311848 [121-149]			PREDICTED: actin-7 [Beta vulgaris subsp. vulgaris] PREDICTED: actin-7 [Beta vulgaris subsp. vulgaris]	731311844; 731311848	0	3251.63	29	206.1	282.6	76.3	219.3	19.9	26	3.4	69.6	63.8	32.9	6.62834e+06	7.47756e+06	1.44774e+06	5.35911e+06	844196	370738	107890	2.41209e+06	2.58849e+06	2.28442e+06	1.43071e+07	1.96227e+07	5.2979e+06	1.52271e+07	1.38418e+06		1.80747e+06
FALSE		High	Unambiguous	MTQIMFETFNTPAMYVAIQAVLSLYASGR	[K].MTQIMFETFNTPAMYVAIQAVLSLYASGR.[T]			4.63406e-07	5.15092e-05	1.942	1	1	1	731380435	731380435 [120-148]			PREDICTED: actin-85C, partial [Beta vulgaris subsp. vulgaris]	731380435	0	3253.61	29
FALSE		High	Unambiguous	MTPNVTDITEPAR	[K].MTPNVTDITEPAR.[V]			2.96711e-05	5.15092e-05	1.393	1	1	5	731362839	731362839 [227-239]			PREDICTED: dihydropyrimidine dehydrogenase (NADP(+)), chloroplastic [Beta vulgaris subsp. vulgaris]	731362839	0	1444.71	13	32.3		181.1	173.9	28.3	14.8	198.1	162.6	104.5	104.4	543760		1.79643e+06	2.22209e+06	626312	109922	3.27455e+06	2.94766e+06	2.21655e+06	3.7902e+06	1.17369e+06		6.57393e+06	6.31375e+06	1.02693e+06		535906
FALSE		High	Unambiguous	MTPHDKQVMMFSATLSK	[K].MTPHDKQVMMFSATLSK.[A]			0.000366924	5.15092e-05	1.061	1	1	1	731316567	731316567 [219-235]			PREDICTED: DEAD-box ATP-dependent RNA helicase 56 [Beta vulgaris subsp. vulgaris]	731316567	1	1951.94	17							1000										1.10084e+06
FALSE		High	Unambiguous	MTPGDASFTAPFR	[K].MTPGDASFTAPFR.[L]			8.69581e-06	5.15092e-05	1.555	1	1	3	731373063	731373063 [257-269]			PREDICTED: protein arginine N-methyltransferase 1.1 [Beta vulgaris subsp. vulgaris]	731373063	0	1397.65	13		11.6		217.1	27.6	18.8		233.4	159.4	332.1		50161		869655	191706	43941		1.32604e+06	1.05968e+06	3.77981e+06		131633		2.47099e+06	314329		214227
FALSE		High	Unambiguous	MTMQETEAIGVSILEDLHQQR	[R].MTMQETEAIGVSILEDLHQQR.[Q]			1.35491e-11	5.15092e-05	3.32	1	1	10	731334924	731334924 [141-161]			PREDICTED: vesicle transport v-SNARE 13 [Beta vulgaris subsp. vulgaris]	731334924	0	2429.18	21	207.7	45.5	104	52.9	46.3	131.4	88.5	147.8	147.4	28.5	8.31209e+06	1.49907e+06	2.45432e+06	1.60751e+06	2.43795e+06	2.32711e+06	3.47981e+06	6.3751e+06	7.43872e+06	2.46539e+06	1.79415e+07	3.93388e+06	8.98144e+06	4.56751e+06	3.99736e+06		1.13455e+07
FALSE		High	Unambiguous	MTLYLKEDQLEYLEERR	[K].MTLYLKEDQLEYLEERR.[L]			2.24179e-05	5.15092e-05	1.43	1	1	3	731330156	731330156 [174-190]			PREDICTED: heat shock cognate protein 80 [Beta vulgaris subsp. vulgaris]	731330156	2	2229.12	17						28.8		19.8	312.6	638.9						74188.7		124053	2.29767e+06	8.03553e+06							361695
FALSE		High	Unambiguous	MTLYLKEDQLEYLEER	[K].MTLYLKEDQLEYLEER.[R]	1xOxidation [M1]	1xOxidation [M1]	0.000372524	5.15092e-05	1.059	1	1	4	731330156	731330156 [174-189]			PREDICTED: heat shock cognate protein 80 [Beta vulgaris subsp. vulgaris]	731330156	1	2089.02	16	13.6					68.6	167.9	23.1	645.9	80.8	133490					297656	1616983	244037	7.98301e+06	1.7092e+06	288136						1.45117e+06
FALSE		High	Unambiguous	MVKDIEVGGGERR	[-].MVKDIEVGGGERR.[E]	1xMet-loss [N-Term]	1xMet-loss [N-Term]	7.70717e-05	5.15092e-05	1.267	1	1	4	731345789	731345789 [1-13]	731345789 1xMet-loss [N-Term]	731345789 1xMet-loss [N-Term]	PREDICTED: aquaporin PIP2-1 [Beta vulgaris subsp. vulgaris]	731345789	2	1314.71	13	477.3		165.2	106.1		13.8	142	60.7	26.5	8.3	5.2973e+06		1.08174e+06	894789		68001.6	1.54906e+06	726263	370444	199292	1.14341e+07		3.95855e+06	2.54241e+06			331530
FALSE		High	Unambiguous	MYQGAGGEGGVPMDDDVPSAGASSGAGAGPKIEEVD	[K].MYQGAGGEGGVPMDDDVPSAGASSGAGAGPKIEEVD.[-]			7.5256e-07	5.15092e-05	1.878	1	1	5	731318762	731318762 [1491-1526]			PREDICTED: LOW QUALITY PROTEIN: uncharacterized protein LOC104887018 [Beta vulgaris subsp. vulgaris]	731318762	1	3378.47	36			23.8	13.5		44.2	230.1	292.1	89.4	307			1.04858e+06	766277		1.46314e+06	16919010	23550346	8439516	49580352			3.83722e+06	2.17726e+06			7.13327e+06
FALSE		High	Unambiguous	SALESMGLQEADILK	[K].SALESMGLQEADILK.[K]	1xOxidation [M6]; 1xGG [S5]	1xOxidation [M6]; 1xGG [S5]	0.103153	0.00296345	0.302	1	9	2	1108973775	1108973775 [409-423]			PREDICTED: uncharacterized protein LOC104903472 [Beta vulgaris subsp. vulgaris]	731382155; 731333460; 731318899; 731340487; 731378861; 1108801518; 731368304; 1108973775; 1108916426	0	1734.86	15
FALSE		High	Unambiguous	MVKFLKPGKAVIVLQGR	[-].MVKFLKPGKAVIVLQGR.[Y]	1xMet-loss [N-Term]	1xMet-loss [N-Term]	4.63933e-05	5.15092e-05	1.334	1	1	4	731377251	731377251 [1-17]	731377251 1xMet-loss [N-Term]	731377251 1xMet-loss [N-Term]	PREDICTED: 60S ribosomal protein L27-3 [Beta vulgaris subsp. vulgaris]	731377251	2	1753.12	17							565.6	161.1	138.8	134.4							3.48362e+06	1.08829e+06	1.09732e+06	1.81861e+06
FALSE		High	Unambiguous	MVYAHFPINASITNTNK	[R].MVYAHFPINASITNTNK.[S]			6.96423e-10	5.15092e-05	2.8	1	1	33	731321334	731321334 [96-112]			PREDICTED: 60S ribosomal protein L9 [Beta vulgaris subsp. vulgaris]	731321334	0	1920.96	17	158.5	186	84.9	103.9	64.6	87.2	49.6	57.5	99	108.7	2.47663e+07	2.39033e+07	7.82449e+06	1.23291e+07	1.32899e+07	6.03352e+06	7.62147e+06	9.67951e+06	1.95097e+07	3.66541e+07	5.34574e+07	6.27275e+07	2.86332e+07	3.50314e+07	2.17906e+07		2.94154e+07
FALSE		High	Unambiguous	MVVSTYQAASGAGAAAMEELELQTR	[R].MVVSTYQAASGAGAAAMEELELQTR.[E]	1xOxidation [M1]	1xOxidation [M1]	6.09068e-06	5.15092e-05	1.602	1	1	1	731354929	731354929 [202-226]			PREDICTED: uncharacterized protein LOC104902692 [Beta vulgaris subsp. vulgaris]	731354929	0	2600.23	25
FALSE		High	Unambiguous	MVVSTYQAASGAGAAAMEELELQTR	[R].MVVSTYQAASGAGAAAMEELELQTR.[E]			9.7705e-14	5.15092e-05	3.971	1	1	8	731354929	731354929 [202-226]			PREDICTED: uncharacterized protein LOC104902692 [Beta vulgaris subsp. vulgaris]	731354929	0	2584.24	25	30	78.3	4	47.6	172.1	136.6	97.9	104.4	132.5	196.6	1.01742e+06	2.18124e+06	79553.5	1.22539e+06	7.67504e+06	2.04825e+06	3.25805e+06	3.81057e+06	5.66033e+06	1.43749e+07	2.19607e+06	5.72405e+06	291121	3.48178e+06	1.25843e+07		9.98591e+06
FALSE		High	Unambiguous	MVVSASGAVKHEDVVEQVKK	[R].MVVSASGAVKHEDVVEQVKK.[V]			8.23218e-09	5.15092e-05	2.474	1	1	10	731339204	731339204 [265-284]			PREDICTED: probable mitochondrial-processing peptidase subunit beta, mitochondrial [Beta vulgaris subsp. vulgaris]	731339204	2	2140.14	20	1.4					190.9	205.1	197.1	129.7	275.8	61643.5					3.78248e+06	9.0203e+06	9.50888e+06	7.32316e+06	2.66491e+07	133056						1.84408e+07
FALSE		High	Unambiguous	MVVSASGAVKHEDVVEQVK	[R].MVVSASGAVKHEDVVEQVK.[K]			2.13843e-08	5.15092e-05	2.348	1	1	8	731339204	731339204 [265-283]			PREDICTED: probable mitochondrial-processing peptidase subunit beta, mitochondrial [Beta vulgaris subsp. vulgaris]	731339204	1	2012.05	19	0.3	2.1	54.2	32.9	0.9	117.7	226.3	177.9	181	206.8	6480	41720	784492	614679	28781.1	1.28034e+06	5.46065e+06	4.70852e+06	5.60545e+06	1.09646e+07	13986.9	109482	2.8708e+06	1.74652e+06	47190.7		6.24209e+06
FALSE		High	Unambiguous	MVVSASGAVK	[R].MVVSASGAVK.[H]			0.000353289	5.15092e-05	1.066	1	1	1	731339204	731339204 [265-274]			PREDICTED: probable mitochondrial-processing peptidase subunit beta, mitochondrial [Beta vulgaris subsp. vulgaris]	731339204	0	948.518	10	197.9		559.3	205.4	37.3						1.18183e+06		1.96958e+06	931754	293418						2.55096e+06		7.20754e+06	2.64744e+06	481101
FALSE		High	Unambiguous	MVVPVIDFSKLDGEER	[-].MVVPVIDFSKLDGEER.[A]	1xMet-loss [N-Term]	1xMet-loss [N-Term]	7.29667e-08	5.15092e-05	2.186	1	1	4	731313049	731313049 [1-16]	731313049 1xMet-loss [N-Term]	731313049 1xMet-loss [N-Term]	PREDICTED: 1-aminocyclopropane-1-carboxylate oxidase 5 [Beta vulgaris subsp. vulgaris]	731313049	1	1702.9	16	89.6	9.3	14.9		2.7	20.5	167.7	220.6	115.9	358.8	986054	83925.2	96546.2		39581.1	99967.8	1.81373e+06	2.61575e+06	1.60799e+06	8.52203e+06	2.12837e+06	220238	353305		64898.9		487376
FALSE		High	Unambiguous	MVYDLLADELQSGLHALSINAK	[R].MVYDLLADELQSGLHALSINAK.[T]			1.25753e-09	5.15092e-05	2.722	1	1	10	731327723	731327723 [77-98]			PREDICTED: sufE-like protein 1, chloroplastic/mitochondrial [Beta vulgaris subsp. vulgaris]	731327723	0	2401.24	22	143.7	122.7	140.1	6.7		206.7	93.9	164.7	121.4		4.55515e+06	3.20063e+06	2.62085e+06	162417		2.90221e+06	2.92663e+06	5.62761e+06	4.8539e+06		9.83218e+06	8.39913e+06	9.59083e+06	461483			1.41492e+07
FALSE		High	Unambiguous	MVVPAEEHALK	[K].MVVPAEEHALK.[I]			0.000234696	5.15092e-05	1.12	4	4	18	731362409; 731362407; 731362411; 731377617	731362409 [136-146]; 731362407 [136-146]; 731362411 [136-146]; 731377617 [132-142]			PREDICTED: petal death protein [Beta vulgaris subsp. vulgaris] PREDICTED: petal death protein [Beta vulgaris subsp. vulgaris] PREDICTED: petal death protein [Beta vulgaris subsp. vulgaris] PREDICTED: petal death protein [Beta vulgaris subsp. vulgaris]	731362409; 731362407; 731362411; 731377617	0	1223.65	11	58.5	51.8	33.1	114.9	63.1	213.6	105.9	118.4	140	100.8	4.8137e+06	3.51036e+06	1.60635e+06	7.18602e+06	6839273	7.78629e+06	8.57297e+06	1.05066e+07	1.45354e+07	1.79155e+07	1.03903e+07	9.21194e+06	5.87834e+06	2.0418e+07	1.1214e+07		3.79607e+07
FALSE		High	Unambiguous	MVVEALEAMDEKEAMEMK	[K].MVVEALEAMDEKEAMEMK.[A]			4.07405e-07	5.15092e-05	1.959	1	1	5	731374597	731374597 [527-544]			PREDICTED: glycine--tRNA ligase, mitochondrial 1-like [Beta vulgaris subsp. vulgaris]	731374597	1	2083.94	18	12.1	416.7		30.3	1.3		140.7	139.8	214.1	45	110705	3.14738e+06		211296	16069.1		1.26985e+06	1.38382e+06	2.48011e+06	891673	238953	8.2594e+06		600367	26347.7
FALSE		High	Unambiguous	MVTKLDEAELK	[-].MVTKLDEAELK.[R]	1xMet-loss+Acetyl [N-Term]	1xMet-loss+Acetyl [N-Term]	3.05667e-06	5.15092e-05	1.693	1	1	2	731374043	731374043 [1-11]	731374043 1xMet-loss+Acetyl [N-Term]	731374043 1xMet-loss+Acetyl [N-Term]	PREDICTED: ER membrane protein complex subunit 2 [Beta vulgaris subsp. vulgaris]	731374043	1	1187.65	11	9.1	7.7		35.8	51.6	64.8	242.1	217.4		371.5	49202.1	34190.7		146501	365767	154391	1.28101e+06	1.26171e+06		4318466	106202	89723.8		416260	599728		752707
FALSE		High	Unambiguous	MVSSGVDKLGQVSVSNATR	[R].MVSSGVDKLGQVSVSNATR.[R]			2.41259e-09	5.15092e-05	2.636	1	1	8	731356945	731356945 [494-512]			PREDICTED: citrate synthase, glyoxysomal [Beta vulgaris subsp. vulgaris]	731356945	1	1935	19				33.5		146.7	206	281.2	136.5	196.1				490902		1.25289e+06	3.90442e+06	5.8445e+06	3.31919e+06	8.163e+06				1.39482e+06			6.10826e+06
FALSE		High	Unambiguous	MVSLLAGTFTNSAKDDLTLLDKR	[K].MVSLLAGTFTNSAKDDLTLLDKR.[H]	1xOxidation [M1]	1xOxidation [M1]	2.70454e-08	5.15092e-05	2.317	1	1	6	731350103	731350103 [59-81]			PREDICTED: uncharacterized protein LOC104900581 [Beta vulgaris subsp. vulgaris]	731350103	2	2525.33	23						397	127		41.7	434.3						2.4146e+06	1.71507e+06		723237	1.28786e+07							1.1772e+07
FALSE		High	Unambiguous	MVSLLAGTFTNSAKDDLTLLDKR	[K].MVSLLAGTFTNSAKDDLTLLDKR.[H]			3.46664e-11	5.15092e-05	3.196	1	1	22	731350103	731350103 [59-81]			PREDICTED: uncharacterized protein LOC104900581 [Beta vulgaris subsp. vulgaris]	731350103	2	2509.33	23	110.2	60.7	9.7	22.2	17.7	172	159.8	172.8	138.2	136.8	1.87801e+07	8.50652e+06	970601	2.87171e+06	3965123	1.29777e+07	2.67522e+07	3.17407e+07	2.97073e+07	5.03004e+07	4.05365e+07	2.23229e+07	3.55186e+06	8.15955e+06	6.50138e+06		6.32705e+07
FALSE		High	Unambiguous	MVRVSVLNDALK	[-].MVRVSVLNDALK.[T]	1xMet-loss [N-Term]	1xMet-loss [N-Term]	3.47879e-05	5.15092e-05	1.372	1	1	9	731318650	731318650 [1-12]	731318650 1xMet-loss [N-Term]	731318650 1xMet-loss [N-Term]	PREDICTED: 40S ribosomal protein S15a-1 [Beta vulgaris subsp. vulgaris]	731318650	1	1213.73	12			2.4		2.5	297	89.4	112.8	95.1	400.9			22594.9		52074.1	2.12262e+06	1.41718e+06	1.9625e+06	1.93541e+06	1.39663e+07			82684.7		85383		1.03485e+07
FALSE		High	Unambiguous	MVRHNNVIPNGHFK	[-].MVRHNNVIPNGHFK.[K]	1xMet-loss [N-Term]	1xMet-loss [N-Term]	0.00117736	5.15092e-05	0.907	1	1	4	731332983	731332983 [1-14]	731332983 1xMet-loss [N-Term]	731332983 1xMet-loss [N-Term]	PREDICTED: 60S ribosomal protein L13-1 [Beta vulgaris subsp. vulgaris]	731332983	1	1531.82	14		21.6		25.5	33.1	11.5	401.6	87.3	245.6	173.8		122627		133222	300053	34973.4	2.71826e+06	647774	2.13375e+06	2.58358e+06		321800		378532	491979		170507
FALSE		High	Unambiguous	MVVEKPFGR	[R].MVVEKPFGR.[D]			1.08325e-05	5.15092e-05	1.526	1	1	8	731313530	731313530 [183-191]			PREDICTED: glucose-6-phosphate 1-dehydrogenase, cytoplasmic [Beta vulgaris subsp. vulgaris]	731313530	0	1062.58	9	44.5	103.2	0.6	36.4	333.2	168.8	70.7	79.8	100.7	62.2	1.48072e+06	2.82485e+06	11463.5	919799	14597169	2.48681e+06	2.31062e+06	2.86239e+06	4.22834e+06	4.46581e+06	3.1961e+06	7.41301e+06	41949.8	2.61347e+06	2.39341e+07		1.2124e+07
FALSE		High	Unambiguous	MVRELFVMAR	[R].MVRELFVMAR.[E]			0.000989284	5.15092e-05	0.93	2	2	3	731353494; 731320262	731353494 [227-236]; 731320262 [234-243]			PREDICTED: 26S protease regulatory subunit 8 homolog A [Beta vulgaris subsp. vulgaris] PREDICTED: 26S protease regulatory subunit 8 homolog A [Beta vulgaris subsp. vulgaris]	731353494; 731320262	1	1251.67	10			14.7	28.2		14.6	221.9	332.2	175	213.3			15841	39051.3		11810.5	397257	652106	401948	838677			57969.1	110959			57580.2
FALSE		High	Unambiguous	MVYITSWDEFVER	[-].MVYITSWDEFVER.[S]	1xMet-loss [N-Term]	1xMet-loss [N-Term]	5.5194e-06	5.15092e-05	1.615	1	1	10	731360733	731360733 [1-13]	731360733 1xMet-loss [N-Term]	731360733 1xMet-loss [N-Term]	PREDICTED: signal recognition particle 9 kDa protein [Beta vulgaris subsp. vulgaris]	731360733	0	1543.74	13	70.6	49.2	25.3	55.4	198.6	198.2	107.6	87.2	120.6	87.4	2.78313e+06	1.59562e+06	589597	1.66076e+06	1.0311e+07	3461069	4.16942e+06	3.7061e+06	5.99943e+06	7.44563e+06	6.00732e+06	4.18726e+06	2.15759e+06	4.71881e+06	1.69064e+07		1.68739e+07
FALSE		High	Unambiguous	MWMQMPAPK	[K].MWMQMPAPK.[R]			0.00166737	5.15092e-05	0.861	1	1	2	731348057	731348057 [71-79]			PREDICTED: aldehyde dehydrogenase family 7 member B4 [Beta vulgaris subsp. vulgaris]	731348057	0	1119.51	9	619.3	22.2	30.4			126.3	20	1.1	61.6	119	2.38008e+06	70326.8	68900.8			214973	75661.9	4547.21	298484	987580	5.13735e+06	184553	252138				1.04807e+06
FALSE		High	Unambiguous	MYPTPSLDFDDWGGGYGFSSSRPSR	[R].MYPTPSLDFDDWGGGYGFSSSRPSR.[T]			0.000126109	5.15092e-05	1.202	1	1	1	731373300	731373300 [354-378]			PREDICTED: heterogeneous nuclear ribonucleoprotein A/B [Beta vulgaris subsp. vulgaris]	731373300	0	2782.22	25										1000										609070
FALSE		High	Unambiguous	MYNSLVER	[R].MYNSLVER.[C]			0.0014225	5.15092e-05	0.882	1	1	15	731334059	731334059 [35-42]			PREDICTED: mitochondrial import inner membrane translocase subunit Tim9 [Beta vulgaris subsp. vulgaris]	731334059	0	1011.49	8	32.6	19	81	52.3	1.4	191.1	106	200.7	174.8	141.1	1.47237e+06	707411	2.16111e+06	1.79667e+06	82337.2	3.82767e+06	4.70934e+06	9.78369e+06	9.97303e+06	1.37793e+07	3.17807e+06	1.8564e+06	7.90846e+06	5.10496e+06	135004		1.86611e+07
FALSE		High	Unambiguous	MYKIDDHVACAVAGIMSDANILINTAR	[K].MYKIDDHVACAVAGIMSDANILINTAR.[V]	1xCarbamidomethyl [C10]	1xCarbamidomethyl [C10]	1.63745e-11	5.15092e-05	3.295	1	1	4	731316538	731316538 [65-91]			PREDICTED: proteasome subunit alpha type-4 [Beta vulgaris subsp. vulgaris]	731316538	1	2962.46	27		191.2	446.3	105.3	22.7	122		104.3		8.1		2.14134e+06	3583618	1.08925e+06	406641	735206		1530898		238307		5.61933e+06	1.3114e+07	3.09495e+06	666746		3.58437e+06
FALSE		High	Unambiguous	MYGSNYGSSYGSGYSSR	[-].MYGSNYGSSYGSGYSSR.[G]	1xAcetyl [N-Term]	1xAcetyl [N-Term]	1.59416e-05	5.15092e-05	1.475	1	1	2	731337750	731337750 [1-17]	731337750 1xAcetyl [N-Term]	731337750 1xAcetyl [N-Term]	PREDICTED: heterogeneous nuclear ribonucleoprotein H2 isoform X1 [Beta vulgaris subsp. vulgaris]	731337750	0	1864.74	17						60.8	175.1	247.5	159.4	357.2						37088.5	237087	367428	277054	1.06221e+06							180819
FALSE		High	Unambiguous	MYGLIEEYNLNGQFR	[K].MYGLIEEYNLNGQFR.[W]	1xOxidation [M1]	1xOxidation [M1]	3.50122e-07	5.15092e-05	1.979	1	2	5	1108966238	1108966238 [624-638]			PREDICTED: sucrose synthase isoform X2 [Beta vulgaris subsp. vulgaris]	1108966230; 1108966238	0	1862.87	15	84.9	244.7	3.6	45.9	234.4	161.9	101.7	17.8	68.1	36.9	1.64801e+06	3.90507e+06	41558.1	676710	5986900	1.39132e+06	1.93901e+06	373151	1.6672e+06	1.54674e+06	3.55719e+06	1.02477e+07	152079	1.92277e+06	9.81638e+06		6.78315e+06
FALSE		High	Unambiguous	MYGLIEEYNLNGQFR	[K].MYGLIEEYNLNGQFR.[W]			7.2416e-08	5.15092e-05	2.187	1	2	23	1108966238	1108966238 [624-638]			PREDICTED: sucrose synthase isoform X2 [Beta vulgaris subsp. vulgaris]	1108966230; 1108966238	0	1846.88	15	112.6	224.1	9.7	60.4	170.9	122.6	99.9	53.7	94.9	51.2	1.71508e+07	2.80821e+07	875539	6.98805e+06	3.42716e+07	8.27304e+06	1.49639e+07	8.81731e+06	1.8235e+07	1.68486e+07	3.70197e+07	7.36934e+07	3.20398e+06	1.98555e+07	5.61931e+07		4.03338e+07
FALSE		High	Unambiguous	MYGGVSLDSFQK	[R].MYGGVSLDSFQK.[Y]			2.62535e-07	5.15092e-05	2.017	1	2	3	731310868	731310868 [428-439]			PREDICTED: histidinol dehydrogenase, chloroplastic isoform X1 [Beta vulgaris subsp. vulgaris]	731310868; 731310870	0	1331.63	12	6.4	16.3	109.6		9.8	93.2	37.8	87.2		639.8	31990	67356.3	325306		64875.1	207648	187165	473156		6.95155e+06	69049.7	176757	1.19044e+06		106372		1.01235e+06
FALSE		High	Unambiguous	MWALDISEGRKPLVR	[R].MWALDISEGRKPLVR.[S]			3.47879e-05	5.15092e-05	1.372	1	1	3	731353794	731353794 [194-208]			PREDICTED: peroxisomal fatty acid beta-oxidation multifunctional protein AIM1 [Beta vulgaris subsp. vulgaris]	731353794	1	1770.97	15						217.4	39.1	149.7	145.6	448.1						547890	218970	918695	1.04558e+06	5.50553e+06							2.67115e+06
FALSE		High	Unambiguous	MYGGDEVSAIVIDLGSHTCK	[-].MYGGDEVSAIVIDLGSHTCK.[A]	1xAcetyl [N-Term]; 1xCarbamidomethyl [C19]	1xAcetyl [N-Term]; 1xCarbamidomethyl [C19]	7.51677e-09	5.15092e-05	2.486	1	1	3	731333913	731333913 [1-20]	731333913 1xAcetyl [N-Term]	731333913 1xAcetyl [N-Term]	PREDICTED: actin-related protein 4 [Beta vulgaris subsp. vulgaris]	731333913	0	2194.02	20						226.5	205.2	363.6	204.7							247080	496953	965597	636118								1.2046e+06
FALSE		High	Unambiguous	MYDYVVKELPELLKENFPQLDTTR	[R].MYDYVVKELPELLKENFPQLDTTR.[A]			0.000260951	5.15092e-05	1.106	1	1	2	731324306	731324306 [122-145]			PREDICTED: S-formylglutathione hydrolase [Beta vulgaris subsp. vulgaris]	731324306	2	2941.5	24							397.7	42.2	560.1								829567	96637.4	1.49957e+06
FALSE		High	Unambiguous	MYDVNDTNAIFVFK	[R].MYDVNDTNAIFVFK.[F]			3.05488e-07	5.15092e-05	1.997	1	1	6	731336057	731336057 [48-61]			PREDICTED: 40S ribosomal protein S24-1 [Beta vulgaris subsp. vulgaris]	731336057	0	1676.8	14			30.5	220.1	73.3	114.8	165.1	87.9	167.6	140.7			282464	2.62353e+06	1.51375e+06	797370	2.54478e+06	1.4867e+06	3.31592e+06	4763725			1.03366e+06	7.45438e+06	2.482e+06		3.88744e+06
FALSE		High	Unambiguous	MYATIDLEKAR	[K].MYATIDLEKAR.[A]			1.96975e-06	5.15092e-05	1.751	1	1	5	731359185	731359185 [49-59]			PREDICTED: phospholipase D alpha 1 [Beta vulgaris subsp. vulgaris]	731359185	1	1310.68	11			4	108.4		73.8	282.5	279.6	78.3	173.5			41915.4	1.44929e+06		575220	4.88683e+06	5.30511e+06	1.73833e+06	6.59214e+06			153387	4.11794e+06			2.80439e+06
FALSE		High	Unambiguous	MYATIDLEK	[K].MYATIDLEK.[A]			0.00059124	5.15092e-05	0.998	1	1	6	731359185	731359185 [49-57]			PREDICTED: phospholipase D alpha 1 [Beta vulgaris subsp. vulgaris]	731359185	0	1083.54	9	76.8	1.6	49.5	67.6	45.6	79.5	180.8	110.7	119.3	268.8	1.45934e+06	24409.9	554707	975732	1.14206e+06	668903	3.37841e+06	2.26789e+06	2.86143e+06	1.10294e+07	3.14995e+06	64056.7	2.02992e+06	2.7724e+06	1.87258e+06		3.26112e+06
FALSE		High	Unambiguous	MYALQDFFQDTAESGASKK	[K].MYALQDFFQDTAESGASKK.[L]			2.76997e-06	5.15092e-05	1.706	1	1	1	731361443	731361443 [1166-1184]			PREDICTED: carbamoyl-phosphate synthase large chain, chloroplastic [Beta vulgaris subsp. vulgaris]	731361443	1	2136.99	19				228.8		342				429.2				337252		293743				1.79738e+06				958252			1.43209e+06
FALSE		High	Unambiguous	MYALQDFFQDTAESGASK	[K].MYALQDFFQDTAESGASK.[K]			3.6662e-06	5.15092e-05	1.669	1	1	7	731361443	731361443 [1166-1183]			PREDICTED: carbamoyl-phosphate synthase large chain, chloroplastic [Beta vulgaris subsp. vulgaris]	731361443	0	2008.9	18		298.3	42.9	54.3		83.6	119.4	98.3	122.5	180.7		1.58683e+06	163777	266976		239293	759025	685558	999078	2.52303e+06		4.16419e+06	599332	758573			1.16663e+06
FALSE		High	Unambiguous	MYADRLEGESKPSIR	[-].MYADRLEGESKPSIR.[D]	1xAcetyl [N-Term]	1xAcetyl [N-Term]	0.00103524	5.15092e-05	0.924	1	1	1	731347555	731347555 [1-15]	731347555 1xAcetyl [N-Term]	731347555 1xAcetyl [N-Term]	PREDICTED: ankyrin repeat and SAM domain-containing protein 6 [Beta vulgaris subsp. vulgaris]	731347555	1	1793.89	15
FALSE		High	Unambiguous	MYGELQGLNKQETALK	[R].MYGELQGLNKQETALK.[Y]			0.000173348	5.15092e-05	1.16	1	1	1	731312899	731312899 [205-220]			PREDICTED: uncharacterized protein LOC104892681 [Beta vulgaris subsp. vulgaris]	731312899	1	1822.94	16		23.4	176.2			157.1		15	94	534.4		21750.2	117652			78742.6		18330.2	134197	1.30582e+06		57077.1	430541				383896
FALSE		High	Unambiguous	MVQSTGAANAQYLR	[K].MVQSTGAANAQYLR.[S]			6.66256e-08	5.15092e-05	2.198	1	1	2	731351415	731351415 [1472-1485]			PREDICTED: ABC transporter C family member 2 [Beta vulgaris subsp. vulgaris]	731351415	0	1509.75	14	4.3		26.5	44.7	176.4	98.9	312.4	336.8			16140.3		58075.1	126148	862883	162657	1.141e+06	1.3488e+06			34838.5		212522	358430	1.41482e+06		793004
FALSE		High	Unambiguous	MVQQDIVDMYMK	[K].MVQQDIVDMYMK.[S]			1.81329e-05	5.15092e-05	1.458	1	1	2	731329951	731329951 [365-376]			PREDICTED: uncharacterized protein LOC104891811 [Beta vulgaris subsp. vulgaris]	731329951	0	1500.69	12	8			172.1	95.2	68.1	54.7	233.8	143.2	224.9	85295.9			1.39562e+06	1.33762e+06	322018	573813	2.68997e+06	1.92719e+06	5.18049e+06	184109			3.96544e+06	2.19322e+06		1.56994e+06
FALSE		High	Unambiguous	MVQEAEEFAEEDKKVK	[R].MVQEAEEFAEEDKKVK.[E]			3.85908e-09	5.15092e-05	2.574	1	1	20	731321538	731321538 [549-564]			PREDICTED: luminal-binding protein [Beta vulgaris subsp. vulgaris]	731321538	2	1909.92	16	38.4	48.1	126.3	41.5	104.1	197.1	64.8	80.1	146.8	152.8	4.70077e+06	4.84239e+06	9.11399e+06	3.85809e+06	1.677e+07	1.06817e+07	7.7946e+06	1.05617e+07	2.26502e+07	4.03685e+07	1.01465e+07	1.27075e+07	3.33521e+07	1.09622e+07	2.74968e+07		5.20766e+07
FALSE		High	Unambiguous	MVLPVPAFNVINGGSHAGNK	[K].MVLPVPAFNVINGGSHAGNK.[L]			6.85145e-12	5.15092e-05	3.41	1	1	32	731345370	731345370 [148-167]			PREDICTED: enolase [Beta vulgaris subsp. vulgaris]	731345370	0	2022.06	20	124.2	67.7	134.2	187.7	171.5	45	52.1	96.1	56.9	64.6	3.06109e+07	1.37151e+07	1.95044e+07	3.51316e+07	55631280	4.90327e+06	1.26085e+07	2.55175e+07	1.76884e+07	3.43539e+07	6.60728e+07	3.59915e+07	7.13752e+07	9.98211e+07	9.12154e+07		2.39051e+07
FALSE		High	Unambiguous	MVLLEKLWDDVLAAR	[-].MVLLEKLWDDVLAAR.[H]	1xMet-loss [N-Term]	1xMet-loss [N-Term]	0.00128926	5.15092e-05	0.895	1	2	3	731350277	731350277 [1-15]	731350277 1xMet-loss [N-Term]	731350277 1xMet-loss [N-Term]	PREDICTED: auxin-repressed 12.5 kDa protein isoform X1 [Beta vulgaris subsp. vulgaris]	731350277; 1108961112	1	1640.94	15	73.5					69.9	352.4	14.6	472.5	17.2	125400					52796.5	591041	26787.4	1.01715e+06	63373.7	270672						257400
FALSE		High	Unambiguous	MVLGTSNNDLMADLKAFDESKLGVK	[-].MVLGTSNNDLMADLKAFDESKLGVK.[G]	1xMet-loss [N-Term]	1xMet-loss [N-Term]	1.60536e-06	5.15092e-05	1.778	1	1	2	731337584	731337584 [1-25]	731337584 1xMet-loss [N-Term]	731337584 1xMet-loss [N-Term]	PREDICTED: 1-aminocyclopropane-1-carboxylate oxidase homolog 1 [Beta vulgaris subsp. vulgaris]	731337584	2	2565.32	25							193.1	208.5	203.6	394.8							399011	472456	540081	1.79199e+06
FALSE		High	Unambiguous	MVLGDAVSK	[R].MVLGDAVSK.[G]			0.00149985	5.15092e-05	0.875	1	1	2	731374597	731374597 [403-411]			PREDICTED: glycine--tRNA ligase, mitochondrial 1-like [Beta vulgaris subsp. vulgaris]	731374597	0	919.492	9	12.5	2.6	143.4	197.4	32.4	53.7	135.2	152.2	202.2	68.5	131767	22233.3	892699	1.58263e+06	449905	250885	1.40244e+06	1.73087e+06	2.69117e+06	1559307	284416	58344.8	3.26678e+06	4.49681e+06	737683		1.22315e+06
FALSE		High	Unambiguous	MVLEATMICIDNSEWMR	[-].MVLEATMICIDNSEWMR.[N]	1xCarbamidomethyl [C9]; 1xMet-loss [N-Term]	1xCarbamidomethyl [C9]; 1xMet-loss [N-Term]	4.56169e-08	5.15092e-05	2.248	1	1	5	731337671	731337671 [1-17]	731337671 1xMet-loss [N-Term]	731337671 1xMet-loss [N-Term]	PREDICTED: 26S proteasome non-ATPase regulatory subunit 4 homolog isoform X1 [Beta vulgaris subsp. vulgaris]	731337671	0	1967.9	17						38.7	315.4	331	247.8	67.1						213249	3860111	4.44215e+06	3.89116e+06	1.80391e+06							1.03966e+06
FALSE		High	Unambiguous	MVLDEWKR	[K].MVLDEWKR.[L]			0.000225973	5.15092e-05	1.125	1	1	14	731313935	731313935 [270-277]			PREDICTED: elongation factor 1-gamma 2 [Beta vulgaris subsp. vulgaris]	731313935	1	1076.56	8	11.2	689.5	6.6	246.1	12.3	3.5	7.6	9.4	7.1	6.7	4.83641e+06	2.46002e+08	1.68275e+06	8.11034e+07	7.04912e+06	671101	3.2422e+06	4.39786e+06	3.88208e+06	6233695	1.04393e+07	6.45561e+08	6.15793e+06	2.30443e+08	1.1558e+07		3.27184e+06
FALSE		High	Unambiguous	MVLAQLGGSISR	[-].MVLAQLGGSISR.[A]	1xMet-loss [N-Term]	1xMet-loss [N-Term]	0.000103563	5.15092e-05	1.228	1	1	1	731359096	731359096 [1-12]	731359096 1xMet-loss [N-Term]	731359096 1xMet-loss [N-Term]	PREDICTED: signal recognition particle 54 kDa protein 2 [Beta vulgaris subsp. vulgaris]	731359096	0	1100.64	12	9.7		45	113.2		96.3	146.7	243.9	125.3	219.8	142176		388151	1258413		624143	2110495	3.84738e+06	2.31384e+06	6944411	306884		1.42042e+06	3.57559e+06			3.0429e+06
FALSE		High	Unambiguous	MVLPVPAFNVINGGSHAGNK	[K].MVLPVPAFNVINGGSHAGNK.[L]	1xOxidation [M1]	1xOxidation [M1]	0.00169277	5.15092e-05	0.859	1	1	2	731345370	731345370 [148-167]			PREDICTED: enolase [Beta vulgaris subsp. vulgaris]	731345370	0	2038.05	20		436.6	64.8			89.9	8.2	7.4	15.3	377.8		3.41917e+06	363842			378879	76959	75733.5	183428	7.76442e+06		8.97264e+06	1.33146e+06				1.84716e+06
FALSE		High	Unambiguous	MVLAASGVEHEDLLSIAEPLLSDLPHVPRPEEPK	[R].MVLAASGVEHEDLLSIAEPLLSDLPHVPRPEEPK.[S]	1xOxidation [M1]	1xOxidation [M1]	2.74906e-06	5.15092e-05	1.707	1	2	1	731354052	731354052 [258-291]			PREDICTED: mitochondrial-processing peptidase subunit alpha isoform X1 [Beta vulgaris subsp. vulgaris]	731354054; 731354052	0	3704.92	34						955.5	30.2			14.3						1.85159e+06	129806			135314							9.02713e+06
FALSE		High	Unambiguous	MVIAASGGVKHEDLVEQVK	[R].MVIAASGGVKHEDLVEQVK.[L]			3.779e-06	5.15092e-05	1.665	1	1	4	731363369	731363369 [270-288]			PREDICTED: probable mitochondrial-processing peptidase subunit beta, mitochondrial [Beta vulgaris subsp. vulgaris]	731363369	1	2010.07	19	38.9	162	31.9	24.8	8.5	148.1	116.2	107.6	190.3	171.8	440317	1.5071e+06	212623	212862	125914	741537	1.29135e+06	1.31213e+06	2.71453e+06	4.19529e+06	950413	3.95497e+06	778081	604816	206454		3.61524e+06
FALSE		High	Unambiguous	MVKTSVLNDALKTMYNAEK	[-].MVKTSVLNDALKTMYNAEK.[I]	1xMet-loss [N-Term]	1xMet-loss [N-Term]	1.46413e-08	5.15092e-05	2.398	1	1	6	731349102	731349102 [1-19]	731349102 1xMet-loss [N-Term]	731349102 1xMet-loss [N-Term]	PREDICTED: 40S ribosomal protein S15a-1 [Beta vulgaris subsp. vulgaris]	731349102	2	2025.07	19							393.5	243.8	282.5	80.2							7.36973e+06	5.008e+06	6.78914e+06	3.29961e+06
FALSE		High	Unambiguous	MVKTSVLNDALK	[-].MVKTSVLNDALK.[T]	1xMet-loss [N-Term]	1xMet-loss [N-Term]	7.36469e-05	5.15092e-05	1.273	1	1	26	731349102	731349102 [1-12]	731349102 1xMet-loss [N-Term]	731349102 1xMet-loss [N-Term]	PREDICTED: 40S ribosomal protein S15a-1 [Beta vulgaris subsp. vulgaris]	731349102	1	1187.7	12	12.4	43.9	9.9	115.6	47.3	216.9	177.4	132.4	145	99.3	1.7721e+06	5.14805e+06	832077	1.25322e+07	8885138	1.36983e+07	2.4872e+07	2.03517e+07	2.61018e+07	3.05681e+07	3.82502e+06	1.35096e+07	3.04493e+06	3.56085e+07	1.45684e+07		6.67836e+07
FALSE		High	Unambiguous	MVKLTFGDFGDSFSMASIR	[-].MVKLTFGDFGDSFSMASIR.[A]	1xMet-loss [N-Term]	1xMet-loss [N-Term]	0.000198671	5.15092e-05	1.142	1	1	4	731332166	731332166 [1-19]	731332166 1xMet-loss [N-Term]	731332166 1xMet-loss [N-Term]	PREDICTED: probable aquaporin TIP-type [Beta vulgaris subsp. vulgaris]	731332166	1	1977.97	19	82.3	407.7	71.8	21.5	125.7	91	28	94.9	10	67	850491	3464131	437437	168355	1.7086e+06	416235	284654	1056531	130701	1.49385e+06	1.83577e+06	9.09062e+06	1.60078e+06	478355	2.80149e+06		2.02929e+06
FALSE		High	Unambiguous	MVKGPGLYSDIGKR	[-].MVKGPGLYSDIGKR.[A]	1xMet-loss [N-Term]	1xMet-loss [N-Term]	2.68098e-10	5.15092e-05	2.926	1	1	90	731344143	731344143 [1-14]	731344143 1xMet-loss [N-Term]	731344143 1xMet-loss [N-Term]	PREDICTED: mitochondrial outer membrane protein porin of 36 kDa [Beta vulgaris subsp. vulgaris]	731344143	2	1389.78	14	29.8	58.7	24.5	29.9	34.4	160.6	206.7	152.1	198.5	104.8	1.43917e+07	2.33181e+07	6.97643e+06	10983375	21847025	3.43269e+07	9.80493e+07	7.91338e+07	1.20846e+08	1.09177e+08	3.10642e+07	6.11917e+07	2.55298e+07	3.12076e+07	3.58213e+07		1.67355e+08
FALSE		High	Unambiguous	MVKGPGLYSDIGK	[-].MVKGPGLYSDIGK.[R]	1xMet-loss [N-Term]	1xMet-loss [N-Term]	7.59127e-05	5.15092e-05	1.269	1	1	8	731344143	731344143 [1-13]	731344143 1xMet-loss [N-Term]	731344143 1xMet-loss [N-Term]	PREDICTED: mitochondrial outer membrane protein porin of 36 kDa [Beta vulgaris subsp. vulgaris]	731344143	1	1233.68	13	70.2	167.6	37.5	24.9	140.6	202.9	106.8	41.6	94.4	113.6	1521402	2.9858e+06	478969	409265	4.01093e+06	1.94606e+06	2.27447e+06	970608	2.57827e+06	5313017	3.28391e+06	7.83537e+06	1.75276e+06	1.16287e+06	6.57649e+06		9.48767e+06
FALSE		High	Unambiguous	MVKFTADELR	[-].MVKFTADELR.[A]	1xMet-loss [N-Term]	1xMet-loss [N-Term]	0.000225973	5.15092e-05	1.125	1	2	65	731362937	731362937 [1-10]	731362937 1xMet-loss [N-Term]	731362937 1xMet-loss [N-Term]	PREDICTED: elongation factor 2 [Beta vulgaris subsp. vulgaris]	731362937; 733214592	1	1078.59	10	33.2	62.1	44.7	49.2	72.1	222.7	145.6	110.1	135.2	125.2	1.68265e+07	2.58717e+07	1.33623e+07	1.8933e+07	4.80788e+07	4.99653e+07	7.2523e+07	6.01312e+07	8.64516e+07	1.36938e+08	3.63196e+07	6.78928e+07	4.88984e+07	5.37954e+07	7.8832e+07		2.43597e+08
FALSE		High	Unambiguous	MVLAASGVEHEDLLSIAEPLLSDLPHVPRPEEPK	[R].MVLAASGVEHEDLLSIAEPLLSDLPHVPRPEEPK.[S]			8.72604e-13	5.15092e-05	3.682	1	2	23	731354052	731354052 [258-291]			PREDICTED: mitochondrial-processing peptidase subunit alpha isoform X1 [Beta vulgaris subsp. vulgaris]	731354054; 731354052	0	3688.93	34	175.1	233.7	172.2	155.5	16.4	109.2	6.4	29.9	45.1	56.4	32486090	3.56715e+07	1.88458e+07	2.19236e+07	4.00803e+06	8.96885e+06	1.16511e+06	5.98426e+06	1.05569e+07	2.26047e+07	7.01204e+07	9.36097e+07	6.89652e+07	6.22926e+07	6.57173e+06		4.37261e+07
FALSE		High	Unambiguous	MVLQNDIDLLNPPAELEK	[-].MVLQNDIDLLNPPAELEK.[K]	1xMet-loss [N-Term]	1xMet-loss [N-Term]	4.98998e-10	5.15092e-05	2.844	1	1	55	1108815450	1108815450 [1-18]	1108815450 1xMet-loss [N-Term]	1108815450 1xMet-loss [N-Term]	PREDICTED: 40S ribosomal protein S27-2 [Beta vulgaris subsp. vulgaris]	1108815450	0	1921.03	18	15.6	12	31.7	100.5	114.1	41.2	196.2	227.8	135.9	125.1	2.42811e+06	1.53313e+06	2.91298e+06	1.19131e+07	2.34276e+07	2.84656e+06	3.00732e+07	3.82841e+07	26740660	4.2105e+07	5.24102e+06	4.02327e+06	1.06599e+07	3.38494e+07	3.84128e+07		1.38779e+07
FALSE		High	Unambiguous	MVLQNDIDLLNPPAELEKK	[-].MVLQNDIDLLNPPAELEKK.[K]	1xMet-loss [N-Term]	1xMet-loss [N-Term]	7.19117e-07	5.15092e-05	1.884	1	1	16	1108815450	1108815450 [1-19]	1108815450 1xMet-loss [N-Term]	1108815450 1xMet-loss [N-Term]	PREDICTED: 40S ribosomal protein S27-2 [Beta vulgaris subsp. vulgaris]	1108815450	1	2049.12	19		182.4	31.8	16.1	145.2	25.9	130.8	200.7	109.2	158		8.9421e+06	1.11913e+06	726932	11392012	682198	7.65938e+06	1.28927e+07	8.20643e+06	2.03201e+07		2.3466e+07	4.0954e+06	2.06547e+06	1.86788e+07		3.32594e+06
FALSE		High	Unambiguous	MVLQNDIDLLNPPAELEKKK	[-].MVLQNDIDLLNPPAELEKKK.[H]	1xMet-loss [N-Term]	1xMet-loss [N-Term]	7.76168e-06	5.15092e-05	1.57	1	1	20	1108815450	1108815450 [1-20]	1108815450 1xMet-loss [N-Term]	1108815450 1xMet-loss [N-Term]	PREDICTED: 40S ribosomal protein S27-2 [Beta vulgaris subsp. vulgaris]	1108815450	2	2177.22	20	48.6	38.1	72.9	83.3		42.4	219.8	191.5	79.6	224	2585452	1666798	2.2881e+06	3.36805e+06		998753	1.14995e+07	1.09892e+07	5.34169e+06	2.5741e+07	5.58064e+06	4.37404e+06	8.37318e+06	9.5698e+06			4.86925e+06
FALSE		High	Unambiguous	MVQEAEEFAEEDKK	[R].MVQEAEEFAEEDKK.[V]			7.69861e-07	5.15092e-05	1.875	1	1	8	731321538	731321538 [549-562]			PREDICTED: luminal-binding protein [Beta vulgaris subsp. vulgaris]	731321538	1	1682.76	14	106.6	121.6	89.6	159	47.1	255.9	39.7	6.1	104.3	70.1	2.21605e+06	2.07904e+06	1.09834e+06	2.5107e+06	1.28875e+06	2.35575e+06	812105	136960	2.7343e+06	3.14805e+06	4.7833e+06	5.45585e+06	4.01932e+06	7.13378e+06	2.11309e+06		1.1485e+07
FALSE		High	Unambiguous	MVQEAEEFAEEDK	[R].MVQEAEEFAEEDK.[K]			1.09979e-05	5.15092e-05	1.524	1	1	1	731321538	731321538 [549-561]			PREDICTED: luminal-binding protein [Beta vulgaris subsp. vulgaris]	731321538	0	1554.66	13			304	696									314587	927742									1.15121e+06	2.63604e+06
FALSE		High	Unambiguous	MVPFAGWSMPIQYKDSIMDSTVNCR	[K].MVPFAGWSMPIQYKDSIMDSTVNCR.[E]	1xCarbamidomethyl [C24]	1xCarbamidomethyl [C24]	0.00155765	5.15092e-05	0.87	1	1	2	731336998	731336998 [52-76]			PREDICTED: aminomethyltransferase, mitochondrial [Beta vulgaris subsp. vulgaris]	731336998	1	2933.35	25
FALSE		High	Unambiguous	MVPASVEFVDIAGLVK	[K].MVPASVEFVDIAGLVK.[G]			7.64495e-06	5.15092e-05	1.572	1	1	2	731311154	731311154 [115-130]			PREDICTED: uncharacterized protein LOC104905269 [Beta vulgaris subsp. vulgaris]	731311154	0	1674.91	16	12.6	25.6		22.4		132.8	162.3	191.2	340.3	112.6	69996.7	116630		94422.4		325640	882975	1.14115e+06	2.37662e+06	1346040	151086	306062		268287			1.5876e+06
FALSE		High	Unambiguous	MVNPGMSNAIGAIR	[-].MVNPGMSNAIGAIR.[I]	1xMet-loss [N-Term]	1xMet-loss [N-Term]	0.000118693	5.15092e-05	1.21	1	2	1	731319224	731319224 [1-14]	731319224 1xMet-loss [N-Term]	731319224 1xMet-loss [N-Term]	PREDICTED: protein C2-DOMAIN ABA-RELATED 1 isoform X1 [Beta vulgaris subsp. vulgaris]	731319226; 731319224	0	1299.68	14					11.7		160.5	318.2	215.4	294.2					54138.2		552191	1201048	951303	2.2236e+06					88767.3
FALSE		High	Unambiguous	IGAGPSSGAADGGMKLGR	[K].IGAGPSSGAADGGMKLGR.[K]	1xOxidation [M14]; 1xGG [K15]	1xOxidation [M14]; 1xGG [K15]	0.108169	0.00328558	0.295	1	1	1	731324187	731324187 [389-406]			PREDICTED: uncharacterized protein LOC104889341 [Beta vulgaris subsp. vulgaris]	731324187	1	1731.84	18
FALSE		High	Unambiguous	MVNHFVQEFKR	[R].MVNHFVQEFKR.[K]	1xOxidation [M1]	1xOxidation [M1]	4.13867e-06	5.15092e-05	1.653	2	2	7	731349044; 731318762	731349044 [243-253]; 731318762 [243-253]; [1118-1128]			PREDICTED: heat shock cognate 70 kDa protein 2 [Beta vulgaris subsp. vulgaris] PREDICTED: LOW QUALITY PROTEIN: uncharacterized protein LOC104887018 [Beta vulgaris subsp. vulgaris]	731349044; 731318762	1	1450.73	11	180	509.5		277.2	0.2	7.3	3.7	4.6	10	7.5	3.11227e+06	7.24534e+06		3.6402e+06	3998.56	55736.8	62991.3	85563.2	219001	279770	6.71777e+06	1.90133e+07		1.03431e+07	6556.21		271735
FALSE		High	Unambiguous	MVNHFVQEFKR	[R].MVNHFVQEFKR.[K]			1.12442e-06	5.15092e-05	1.825	2	2	218	731349044; 731318762	731349044 [243-253]; 731318762 [243-253]; [1118-1128]			PREDICTED: heat shock cognate 70 kDa protein 2 [Beta vulgaris subsp. vulgaris] PREDICTED: LOW QUALITY PROTEIN: uncharacterized protein LOC104887018 [Beta vulgaris subsp. vulgaris]	731349044; 731318762	1	1434.73	11	60.5	114.1	45.4	118.7	82.8	118.4	112.5	88.6	141.2	117.7	3.31457e+07	5.13649e+07	1.46758e+07	4.93476e+07	5.96987e+07	2.87073e+07	6.05072e+07	5.22652e+07	9.75181e+07	1.39145e+08	7.15443e+07	1.34793e+08	5.37052e+07	1.40214e+08	9.78845e+07		1.39958e+08
FALSE		High	Unambiguous	MVNHFVQEFK	[R].MVNHFVQEFK.[R]	1xOxidation [M1]	1xOxidation [M1]	2.47241e-06	5.15092e-05	1.721	2	2	16	731349044; 731318762	731349044 [243-252]; 731318762 [243-252]; [1118-1127]			PREDICTED: heat shock cognate 70 kDa protein 2 [Beta vulgaris subsp. vulgaris] PREDICTED: LOW QUALITY PROTEIN: uncharacterized protein LOC104887018 [Beta vulgaris subsp. vulgaris]	731349044; 731318762	0	1294.62	10	103.8	98.8	20	92.2	532.1	49.4	22	8	41.1	32.5	9.51624e+06	7.44942e+06	1.08087e+06	6.42202e+06	6.42159e+07	2.00548e+06	1.98375e+06	791788	4.74975e+06	6.43627e+06	2.05406e+07	1.95489e+07	3.95538e+06	1.82472e+07	1.05291e+08		9.77737e+06
FALSE		High	Unambiguous	MVNHFVQEFK	[R].MVNHFVQEFK.[R]			1.26932e-06	5.15092e-05	1.809	2	2	171	731349044; 731318762	731349044 [243-252]; 731318762 [243-252]; [1118-1127]			PREDICTED: heat shock cognate 70 kDa protein 2 [Beta vulgaris subsp. vulgaris] PREDICTED: LOW QUALITY PROTEIN: uncharacterized protein LOC104887018 [Beta vulgaris subsp. vulgaris]	731349044; 731318762	0	1278.63	10	67.5	117.3	56.8	101.1	253.5	115.4	48.9	67.8	85.5	86.1	5.56462e+07	7.95193e+07	2.76344e+07	6.32949e+07	275075796	4.21264e+07	3.96438e+07	6.02618e+07	8.89135e+07	1.53168e+08	1.20111e+08	2.08676e+08	1.01127e+08	1.79843e+08	4.51026e+08		2.0538e+08
FALSE		High	Unambiguous	MVNGPGLFSDIGKR	[-].MVNGPGLFSDIGKR.[A]	1xMet-loss [N-Term]	1xMet-loss [N-Term]	5.68591e-07	5.15092e-05	1.915	1	1	6	731337148	731337148 [1-14]	731337148 1xMet-loss [N-Term]	731337148 1xMet-loss [N-Term]	PREDICTED: mitochondrial outer membrane protein porin 2 [Beta vulgaris subsp. vulgaris]	731337148	1	1359.74	14	1.3		2.1	49.3		78.9	82.7	221.6	199.5	364.6	19113.6		18593.3	561722		524170	1.21919e+06	3583480	3.77529e+06	1.18056e+07	41256.2		68041	1.59605e+06			2.5555e+06
FALSE		High	Unambiguous	MVNGESVTTTLSDGVYTGMNAYQFK	[R].MVNGESVTTTLSDGVYTGMNAYQFK.[F]			3.98482e-06	5.15092e-05	1.658	1	1	4	731377457	731377457 [434-458]			PREDICTED: uncharacterized protein LOC104884875 [Beta vulgaris subsp. vulgaris]	731377457	0	2713.25	25				60.1		72.7	238.4	242.1	225.1	161.6				287961		202825	1.47711e+06	1645433	1.79027e+06	2199462				818197			988838
FALSE		High	Unambiguous	MVMPGDNVTATFELISAVPLEPGQR	[K].MVMPGDNVTATFELISAVPLEPGQR.[F]			8.69075e-07	5.15092e-05	1.859	1	1	9	731317922	731317922 [409-433]			PREDICTED: elongation factor Tu, mitochondrial [Beta vulgaris subsp. vulgaris]	731317922	0	2672.34	25	41.3	1.3	28.1	30	123	109.8	192.5	88.5	137	248.4	2.06438e+06	54827.7	828985	1.1419e+06	8.09878e+06	2.43168e+06	9.46449e+06	4.77378e+06	8.64424e+06	2.68173e+07	4.45591e+06	143880	3.03362e+06	3.24455e+06	1.32791e+07		1.18552e+07
FALSE		High	Unambiguous	MVLYLVGCHAGPHILK	[R].MVLYLVGCHAGPHILK.[H]	1xCarbamidomethyl [C8]	1xCarbamidomethyl [C8]	3.3987e-06	5.15092e-05	1.679	2	2	3	731320060; 731320062	731320060 [157-172]; 731320062 [157-172]			PREDICTED: chalcone synthase 2-like [Beta vulgaris subsp. vulgaris] PREDICTED: chalcone synthase 2-like [Beta vulgaris subsp. vulgaris]	731320060; 731320062	0	1807.97	16	339.4	305.8	2.5	135.7	216.6						5.03156e+06	3.7294e+06	21856	1.52789e+06	4.22736e+06						1.08605e+07	9.78675e+06	79980.7	4.34128e+06	6.93136e+06
FALSE		High	Unambiguous	MVLSSAVTESDNSVHSTFASR	[-].MVLSSAVTESDNSVHSTFASR.[Y]	1xMet-loss [N-Term]	1xMet-loss [N-Term]	1.63553e-13	5.15092e-05	3.903	1	1	16	731357953	731357953 [1-21]	731357953 1xMet-loss [N-Term]	731357953 1xMet-loss [N-Term]	PREDICTED: glutamate decarboxylase [Beta vulgaris subsp. vulgaris]	731357953	0	2094.01	21	21.7	53.5	2.5	72		178.4	202.4	211.9	100.3	157.4	1.53377e+06	3.11706e+06	104809	3.86947e+06		5.59157e+06	1.40776e+07	16163000	8.95295e+06	2.40409e+07	3.3106e+06	8.17982e+06	383540	1.09945e+07			2.72607e+07
FALSE		High	Unambiguous	MVLSETSADASTQNLSCTFASR	[-].MVLSETSADASTQNLSCTFASR.[Y]	1xCarbamidomethyl [C17]; 1xMet-loss [N-Term]	1xCarbamidomethyl [C17]; 1xMet-loss [N-Term]	2.28529e-11	5.15092e-05	3.251	1	1	9	731351879	731351879 [1-22]	731351879 1xMet-loss [N-Term]	731351879 1xMet-loss [N-Term]	PREDICTED: glutamate decarboxylase [Beta vulgaris subsp. vulgaris]	731351879	0	2245.04	22			8.3	23.4		106.9	267	288.4	77.9	228.3			126426	460487		1.22707e+06	6.80438e+06	8.05998e+06	2.54675e+06	12778494			462649	1.30841e+06			5.98236e+06
FALSE		High	Unambiguous	MVLSEAVFDADSYIQCTFASR	[-].MVLSEAVFDADSYIQCTFASR.[H]	1xCarbamidomethyl [C16]; 1xMet-loss [N-Term]	1xCarbamidomethyl [C16]; 1xMet-loss [N-Term]	1.75916e-05	5.15092e-05	1.462	1	1	2	731337957	731337957 [1-21]	731337957 1xMet-loss [N-Term]	731337957 1xMet-loss [N-Term]	PREDICTED: glutamate decarboxylase 4 [Beta vulgaris subsp. vulgaris]	731337957	0	2279.06	21		108		59.8	48.4	194.6				589.1		172297		88197.2	123725	167179				2.46736e+06		452144		250599	202865		815054
FALSE		High	Unambiguous	MVKETEYYDLLGVGVDATPTDIKK	[-].MVKETEYYDLLGVGVDATPTDIKK.[A]	1xMet-loss [N-Term]	1xMet-loss [N-Term]	9.23915e-06	5.15092e-05	1.547	1	1	4	731358602	731358602 [1-24]	731358602 1xMet-loss [N-Term]	731358602 1xMet-loss [N-Term]	PREDICTED: chaperone protein dnaJ 10 [Beta vulgaris subsp. vulgaris]	731358602	2	2554.33	24	29.2	22.7		62.2	14.9	120.6	75.6	50.3	524.5	100.1	879892	561889		1421781	591189	1.60719e+06	2.23584e+06	1.63227e+06	1.99172e+07	6.50444e+06	1.89923e+06	1.47452e+06		4.03978e+06	969339		7.83557e+06
FALSE		High	Unambiguous	NFWVDFLMGGVSAAVSK	[K].NFWVDFLMGGVSAAVSK.[T]			0.00148854	5.15092e-05	0.876	1	1	1	731355267	731355267 [82-98]			PREDICTED: ADP,ATP carrier protein [Beta vulgaris subsp. vulgaris]	731355267	0	1827.91	17		74.6			378.7	504.7				42		288965			2.3487e+06	1.05258e+06				426871		758306			3.85103e+06		5.13169e+06
FALSE		High	Unambiguous	MISPVPIQLSIYSPK	[K].MISPVPIQLSIYSPK.[V]			6.9316e-05	5.15092e-05	1.281	1	1	1	731360727	731360727 [125-139]			PREDICTED: dynamin-related protein 1E [Beta vulgaris subsp. vulgaris]	731360727	0	1672.93	15								48.7		951.3								144739		5659862
FALSE		High	Unambiguous	MLSPHILGEEHYNTAR	[R].MLSPHILGEEHYNTAR.[G]	1xOxidation [M1]	1xOxidation [M1]	2.83198e-07	5.15092e-05	2.007	1	1	10	731341013	731341013 [431-446]			PREDICTED: ATP synthase subunit beta, mitochondrial [Beta vulgaris subsp. vulgaris]	731341013	0	1883.91	16	19.5	161.8	63.6	63.4	415.4	128.1	34.2	10.5	11.9	91.6	860961	5.87314e+06	1.6552e+06	2.12478e+06	2.41309e+07	2.502e+06	1.48452e+06	498599	660032	8.72585e+06	1.85836e+06	1.54124e+07	6.05712e+06	6.03726e+06	3.9566e+07		1.21981e+07
FALSE		High	Unambiguous	MDYVNQAMER	[K].MDYVNQAMER.[L]			0.000227692	5.15092e-05	1.124	1	1	5	731360180	731360180 [327-336]			PREDICTED: probable cinnamyl alcohol dehydrogenase 1 [Beta vulgaris subsp. vulgaris]	731360180	0	1256.54	10	6.7		71.1		81.3	78.3	98.6	196	221.1	246.9	57413.4		360944		920244	298307	833908	1.81679e+06	2.39886e+06	4.58385e+06	123925		1.32085e+06		1.50887e+06		1.45434e+06
FALSE		High	Unambiguous	MDWGSVTAEDLIDALR	[-].MDWGSVTAEDLIDALR.[E]	1xAcetyl [N-Term]	1xAcetyl [N-Term]	6.61228e-08	5.15092e-05	2.199	1	2	2	731367541	731367541 [1-16]	731367541 1xAcetyl [N-Term]	731367541 1xAcetyl [N-Term]	PREDICTED: PRA1 family protein A1 isoform X1 [Beta vulgaris subsp. vulgaris]	731367541; 731367545	0	1833.87	16	497.4	230.4	129.6	142.6							3.57956e+06	1.36414e+06	550215	779471							7.72639e+06	3.57979e+06	2.01348e+06	2.21475e+06
FALSE		High	Unambiguous	MDVVQLLQR	[-].MDVVQLLQR.[Q]	1xAcetyl [N-Term]	1xAcetyl [N-Term]	9.52343e-06	5.15092e-05	1.543	1	2	5	731334920	731334920 [1-9]	731334920 1xAcetyl [N-Term]	731334920 1xAcetyl [N-Term]	PREDICTED: histidine-containing phosphotransfer protein 1-like [Beta vulgaris subsp. vulgaris]	731362177; 731334920	0	1143.62	9	43.2	24.1	171.2	218.4	15.9	63.2	9.8	176.8	155.7	121.8	517048	237025	1.20965e+06	1.98725e+06	250701	335103	114821	2.28217e+06	2.3516e+06	3.14818e+06	1.11604e+06	622004	4.42663e+06	5.64648e+06	411060		1.63374e+06
FALSE		High	Unambiguous	SLGGVSHIEDLTK	[R].SLGGVSHIEDLTK.[H]	1xGG [T12]	1xGG [T12]	0.110384	0.00332293	0.292	1	1	1	731311453	731311453 [845-857]			PREDICTED: BAG family molecular chaperone regulator 6 [Beta vulgaris subsp. vulgaris]	731311453	0	1469.76	13
FALSE		High	Unambiguous	MDVSKGTNQNQVEGTGENVLAK	[-].MDVSKGTNQNQVEGTGENVLAK.[H]	1xAcetyl [N-Term]	1xAcetyl [N-Term]	5.39833e-05	5.15092e-05	1.314	1	2	1	731352670	731352670 [1-22]	731352670 1xAcetyl [N-Term]	731352670 1xAcetyl [N-Term]	PREDICTED: probable peroxygenase 4 [Beta vulgaris subsp. vulgaris]	731352668; 731352670	1	2361.14	22								236.4		763.6								140057		906065
FALSE		High	Unambiguous	MDVLYPQSSVSPSSR	[-].MDVLYPQSSVSPSSR.[L]	1xAcetyl [N-Term]	1xAcetyl [N-Term]	3.3242e-05	5.15092e-05	1.378	1	1	4	731362460	731362460 [1-15]	731362460 1xAcetyl [N-Term]	731362460 1xAcetyl [N-Term]	PREDICTED: protein EARLY RESPONSIVE TO DEHYDRATION 15 [Beta vulgaris subsp. vulgaris]	731362460	0	1694.81	15	63.1			41	27.7		157.3	280.1	198.6	232.3	246065			121400	142372		603267	1.1776e+06	977053	1.95613e+06	531126			344939	233439
FALSE		High	Unambiguous	MDVIKTQQISSR	[-].MDVIKTQQISSR.[A]	1xAcetyl [N-Term]	1xAcetyl [N-Term]	5.51618e-07	5.15092e-05	1.919	1	1	5	731315128	731315128 [1-12]	731315128 1xAcetyl [N-Term]	731315128 1xAcetyl [N-Term]	PREDICTED: 26S proteasome non-ATPase regulatory subunit 7 homolog A [Beta vulgaris subsp. vulgaris]	731315128	1	1447.76	12	19.7		5.4	135.2		69.1	177.5	219.7	110.4	263	498773		81073	2.5976e+06		773780	4408967	5.9854e+06	3518905	14353702	1.07659e+06		296682	7.3807e+06			3.77243e+06
FALSE		High	Unambiguous	MEAAAAAGR	[-].MEAAAAAGR.[S]	1xAcetyl [N-Term]	1xAcetyl [N-Term]	6.57359e-05	5.15092e-05	1.288	1	7	2	731371796	731371796 [1-9]	731371796 1xAcetyl [N-Term]	731371796 1xAcetyl [N-Term]	PREDICTED: uncharacterized protein LOC104883348 isoform X1 [Beta vulgaris subsp. vulgaris]	731371796; 731371800; 731371812; 731371808; 731371815; 731371804; 1108863585	0	889.42	9		19.9	10.3		71.1	41.1	165.9	250.1	180.8	260.8		58692.4	21770		335307	65259	584144	965520	816838	2.01699e+06		154021	79665.9		549783		318159
FALSE		High	Unambiguous	MDTVKDVLGR	[R].MDTVKDVLGR.[W]			0.000212687	5.15092e-05	1.133	1	1	2	731339782	731339782 [109-118]			PREDICTED: GLABRA2 expression modulator [Beta vulgaris subsp. vulgaris]	731339782	1	1133.6	10			46.2	47.3		168.2	279.9		121.2	337.3			67117.5	88669.5		183580	678156		376718	1.79476e+06			245612	251941			895015
FALSE		High	Unambiguous	MDTGAPAKPVQPISIFGSSTLGHHLGRR	[-].MDTGAPAKPVQPISIFGSSTLGHHLGRR.[L]	1xAcetyl [N-Term]	1xAcetyl [N-Term]	1.18496e-07	5.15092e-05	2.122	1	1	10	731350099	731350099 [1-28]	731350099 1xAcetyl [N-Term]	731350099 1xAcetyl [N-Term]	PREDICTED: pyruvate decarboxylase 1 [Beta vulgaris subsp. vulgaris]	731350099	1	2972.55	28		1.7	31.4	22.8	7.3	12.7	491.8	268.1	104.2	60		33180.4	438835	410347	228080	133299	1.14544e+07	6.8478e+06	3.11388e+06	3.06904e+06		87072.6	1.60589e+06	1.16594e+06	373970		649876
FALSE		High	Unambiguous	MHYTVIDSTK	[-].MHYTVIDSTK.[Y]	1xGG [T4]; 1xMet-loss [N-Term]	1xGG [T4]; 1xMet-loss [N-Term]	0.118059	0.00351463	0.282	1	1	1	731319904	731319904 [1-10]	731319904 1xMet-loss [N-Term]	731319904 1xMet-loss [N-Term]	PREDICTED: transcription factor TGA6 isoform X2 [Beta vulgaris subsp. vulgaris]	731319904	0	1177.58	10
FALSE		High	Unambiguous	MDTGAPAKPVQPISIFGSSTLGHHLGR	[-].MDTGAPAKPVQPISIFGSSTLGHHLGR.[R]	1xAcetyl [N-Term]	1xAcetyl [N-Term]	1.41543e-14	5.15092e-05	4.226	1	1	36	731350099	731350099 [1-27]	731350099 1xAcetyl [N-Term]	731350099 1xAcetyl [N-Term]	PREDICTED: pyruvate decarboxylase 1 [Beta vulgaris subsp. vulgaris]	731350099	0	2816.45	27	109.7	32.7	167.4	142.1	249.4	47.4	35.8	70.4	53.6	91.5	1.46788e+07	3.60428e+06	1.32176e+07	1.44534e+07	4.39437e+07	2.81093e+06	4.70278e+06	1.01575e+07	9.05043e+06	2.64421e+07	3.16838e+07	9.4584e+06	4.83691e+07	4.10672e+07	7.2052e+07		1.37042e+07
FALSE		High	Unambiguous	MDSSKGTSNEAKGVDVYTAK	[-].MDSSKGTSNEAKGVDVYTAK.[G]	1xAcetyl [N-Term]	1xAcetyl [N-Term]	9.07891e-10	5.15092e-05	2.765	1	1	3	731357771	731357771 [1-20]	731357771 1xAcetyl [N-Term]	731357771 1xAcetyl [N-Term]	PREDICTED: rhodanese-like domain-containing protein 19, mitochondrial [Beta vulgaris subsp. vulgaris]	731357771	2	2130	20					5.7		206.8	361.4	134.8	291.3					38572.3		1.04e+06	1.99305e+06	869832	3.21755e+06					63244.7
FALSE		High	Unambiguous	MDSPQSVVSPFK	[-].MDSPQSVVSPFK.[N]	1xAcetyl [N-Term]	1xAcetyl [N-Term]	1.94013e-06	5.15092e-05	1.753	1	1	2	731329951	731329951 [1-12]	731329951 1xAcetyl [N-Term]	731329951 1xAcetyl [N-Term]	PREDICTED: uncharacterized protein LOC104891811 [Beta vulgaris subsp. vulgaris]	731329951	0	1363.66	12		5.6	132.5	127.6	41.1	40.1		246.3	149.7	257.1		31811.6	538513	667882	372536	122245		1.82858e+06	1.30022e+06	3822949		83480.4	1.97065e+06	1.89769e+06	610826		595985
FALSE		High	Unambiguous	MDSIFANVVQAPEDPILGVTVAYNKDPSPVKLNLGVGAYR	[-].MDSIFANVVQAPEDPILGVTVAYNKDPSPVKLNLGVGAYR.[T]	1xAcetyl [N-Term]	1xAcetyl [N-Term]	6.31472e-09	5.15092e-05	2.509	1	1	2	731353768	731353768 [1-40]	731353768 1xAcetyl [N-Term]	731353768 1xAcetyl [N-Term]	PREDICTED: aspartate aminotransferase, cytoplasmic [Beta vulgaris subsp. vulgaris]	731353768	2	4300.23	40							853			147							1.86284e+06			705349
FALSE		High	Unambiguous	MDSIFANVVQAPEDPILGVTVAYNKDPSPVK	[-].MDSIFANVVQAPEDPILGVTVAYNKDPSPVK.[L]	1xAcetyl [N-Term]	1xAcetyl [N-Term]	1.83776e-08	5.15092e-05	2.368	1	1	15	731353768	731353768 [1-31]	731353768 1xAcetyl [N-Term]	731353768 1xAcetyl [N-Term]	PREDICTED: aspartate aminotransferase, cytoplasmic [Beta vulgaris subsp. vulgaris]	731353768	1	3356.71	31	90.5	10.8	41	136	232.8	39.7	138.5	184.7	116.8	9.3	5.94059e+06	584589	1.58758e+06	6.78245e+06	2.01198e+07	1.15301e+06	8.93225e+06	1.30679e+07	9667701	1.31163e+06	1.28226e+07	1.53409e+06	5.80966e+06	1.92713e+07	3.29893e+07		5.62131e+06
FALSE		High	Unambiguous	MDTSIQVQR	[-].MDTSIQVQR.[V]	1xAcetyl [N-Term]	1xAcetyl [N-Term]	8.96801e-05	5.15092e-05	1.247	1	1	3	731322096	731322096 [1-9]	731322096 1xAcetyl [N-Term]	731322096 1xAcetyl [N-Term]	PREDICTED: jasmonate-induced protein homolog [Beta vulgaris subsp. vulgaris]	731322096	0	1119.55	9						71.3	183.7	283.7	197.5	263.8						922387	5277527	8938896	7.28373e+06	16644450							4.49694e+06
FALSE		High	Unambiguous	MDSLDPADRRYFEDDDTPMMK	[-].MDSLDPADRRYFEDDDTPMMK.[V]	1xAcetyl [N-Term]	1xAcetyl [N-Term]	0.000652395	5.15092e-05	0.985	1	1	3	731323927	731323927 [1-21]	731323927 1xAcetyl [N-Term]	731323927 1xAcetyl [N-Term]	PREDICTED: outer envelope pore protein 16-3, chloroplastic/mitochondrial [Beta vulgaris subsp. vulgaris]	731323927	2	2590.09	21						42.9	290.9	223.3	248.4	194.6						117250	1.76591e+06	1486747	1.93548e+06	2594348							571632
FALSE		High	Unambiguous	MEAELKELLNDLEDVKR	[-].MEAELKELLNDLEDVKR.[S]	1xAcetyl [N-Term]	1xAcetyl [N-Term]	2.88859e-12	5.15092e-05	3.524	1	1	10	731366971	731366971 [1-17]	731366971 1xAcetyl [N-Term]	731366971 1xAcetyl [N-Term]	PREDICTED: ubiquitin-like modifier-activating enzyme 5 [Beta vulgaris subsp. vulgaris]	731366971	2	2087.07	17	68.1	130.1	141.7	83.9	62	83.4	137.3	187.9	78.5	27.3	4.84251e+06	7.61364e+06	5.94841e+06	4.53358e+06	5.80436e+06	2.62672e+06	9.60292e+06	1.441e+07	7.04101e+06	4.18822e+06	1.04524e+07	1.99798e+07	2.17679e+07	1.28815e+07	9.51707e+06		1.28061e+07
FALSE		High	Unambiguous	MEAIEELSQLSDAMR	[-].MEAIEELSQLSDAMR.[Q]	1xAcetyl [N-Term]; 1xOxidation [M14]	1xAcetyl [N-Term]; 1xOxidation [M14]	3.779e-06	5.15092e-05	1.665	1	1	1	731341935	731341935 [1-15]	731341935 1xAcetyl [N-Term]	731341935 1xAcetyl [N-Term]	PREDICTED: dynamin-2B [Beta vulgaris subsp. vulgaris]	731341935	0	1780.81	15					842.4			157.6							4.12202e+06			631311							6.75863e+06
FALSE		High	Unambiguous	MEDSNHLLELDEISANGVSTNHGWQK	[-].MEDSNHLLELDEISANGVSTNHGWQK.[V]	1xAcetyl [N-Term]	1xAcetyl [N-Term]	1.26709e-09	5.15092e-05	2.721	1	1	1	731367989	731367989 [1-26]	731367989 1xAcetyl [N-Term]	731367989 1xAcetyl [N-Term]	PREDICTED: uncharacterized protein LOC104908484 [Beta vulgaris subsp. vulgaris]	731367989	0	2966.36	26	12.2		15.8			34.9	153.6	299.4		484.2	52364		39810.6			66062.5	645584	1.38051e+06		4.47122e+06	113027		145685				322076
FALSE		High	Unambiguous	MEDQDAFERDFCQLKPYYTDAR	[K].MEDQDAFERDFCQLKPYYTDAR.[D]	1xCarbamidomethyl [C12]	1xCarbamidomethyl [C12]	4.23617e-05	5.15092e-05	1.346	1	1	2	731367398	731367398 [75-96]			PREDICTED: 26S proteasome non-ATPase regulatory subunit 8 homolog A [Beta vulgaris subsp. vulgaris]	731367398	1	2798.22	22		35.1			3.9	54	270.5		347.6	288.9		235316			42122.6	194728	2.1668e+06		3.57328e+06	5083400		617520			69066		949363
FALSE		High	Unambiguous	MEDLEGGVDFLADERKK	[-].MEDLEGGVDFLADERKK.[A]	1xAcetyl [N-Term]	1xAcetyl [N-Term]	1.58029e-07	5.15092e-05	2.084	1	1	3	731332207	731332207 [1-17]	731332207 1xAcetyl [N-Term]	731332207 1xAcetyl [N-Term]	PREDICTED: peroxisomal acyl-coenzyme A oxidase 1 [Beta vulgaris subsp. vulgaris]	731332207	2	1993.95	17	12.7	4.9	23.8	27.8	21.9	148.1	419.2	21.5	170.5	149.8	118390	37346.9	131428	197590	269576	613578	3.85378e+06	216355	2.01146e+06	3.02527e+06	255542	98006.2	480952	561422	442008		2.9914e+06
FALSE		High	Unambiguous	MEDLEGGVDFLADER	[-].MEDLEGGVDFLADER.[K]	1xAcetyl [N-Term]	1xAcetyl [N-Term]	2.30673e-08	5.15092e-05	2.338	1	1	8	731332207	731332207 [1-15]	731332207 1xAcetyl [N-Term]	731332207 1xAcetyl [N-Term]	PREDICTED: peroxisomal acyl-coenzyme A oxidase 1 [Beta vulgaris subsp. vulgaris]	731332207	0	1737.76	15	150.7	70.8	93.3	74.4	372.1	53.9	41.3	31.6	45.9	65.9	3.34545e+06	1.29255e+06	1221223	1.25473e+06	10875930	530050	901791	756082	1.28644e+06	3.15947e+06	7.22106e+06	3.39192e+06	4.46899e+06	3.56512e+06	1.78326e+07		2.58417e+06
FALSE		High	Unambiguous	MEDIDDLPKNAANYTPLTPLWFLER	[-].MEDIDDLPKNAANYTPLTPLWFLER.[A]	1xAcetyl [N-Term]	1xAcetyl [N-Term]	9.29854e-08	5.15092e-05	2.154	1	1	4	731322024	731322024 [1-25]	731322024 1xAcetyl [N-Term]	731322024 1xAcetyl [N-Term]	PREDICTED: acetate/butyrate--CoA ligase AAE7, peroxisomal [Beta vulgaris subsp. vulgaris]	731322024	1	3004.48	25						61.7	196.9	189.4	293.9	258						323625	2.29064e+06	2.41709e+06	4.38926e+06	6.59346e+06							1.57778e+06
FALSE		High	Unambiguous	MEDIDDLPK	[-].MEDIDDLPK.[N]	1xAcetyl [N-Term]	1xAcetyl [N-Term]	0.000818734	5.15092e-05	0.955	1	1	1	731322024	731322024 [1-9]	731322024 1xAcetyl [N-Term]	731322024 1xAcetyl [N-Term]	PREDICTED: acetate/butyrate--CoA ligase AAE7, peroxisomal [Beta vulgaris subsp. vulgaris]	731322024	0	1117.51	9	100.6		103.1	242.6		59.9	171.6	135.5	82	104.8	448602		271114	822075		118258	751917	651484	461156	1.00903e+06	968297		992124	2.3358e+06			576547
FALSE		High	Unambiguous	MECVFGLVGDGFAVIAADTSAVNSILVHK	[-].MECVFGLVGDGFAVIAADTSAVNSILVHK.[S]	1xAcetyl [N-Term]; 1xCarbamidomethyl [C3]	1xAcetyl [N-Term]; 1xCarbamidomethyl [C3]	1.83452e-11	5.15092e-05	3.28	1	1	30	731367225	731367225 [1-29]	731367225 1xAcetyl [N-Term]	731367225 1xAcetyl [N-Term]	PREDICTED: proteasome subunit beta type-2-A [Beta vulgaris subsp. vulgaris]	731367225	0	3062.53	29	208.2	158.1	82.3	132	96.3	31.7	84.7	27.1	125.8	53.8	2.03257e+07	1.26937e+07	4.73852e+06	9.79297e+06	1.23754e+07	1.3697e+06	8.12769e+06	2.8552e+06	1.54937e+07	1.13358e+07	4.38726e+07	3.33109e+07	1.73403e+07	2.78253e+07	2.02912e+07		6.67775e+06
FALSE		High	Unambiguous	MEAIEELSQLSDAMR	[-].MEAIEELSQLSDAMR.[Q]	1xAcetyl [N-Term]	1xAcetyl [N-Term]	1.22927e-09	5.15092e-05	2.725	1	1	16	731341935	731341935 [1-15]	731341935 1xAcetyl [N-Term]	731341935 1xAcetyl [N-Term]	PREDICTED: dynamin-2B [Beta vulgaris subsp. vulgaris]	731341935	0	1764.81	15	92	17.5	83	139.3	192.4	35.9	160.5	130.5	140.4	8.4	1.05915e+07	1653441	5.63354e+06	1.2173e+07	2.91489e+07	1.83122e+06	1.8151e+07	1.61843e+07	2.03707e+07	2.08885e+06	2.28615e+07	4.33898e+06	2.06156e+07	3.45878e+07	4.77938e+07		8.92778e+06
FALSE		High	Unambiguous	MEAVVVDAGSSLLK	[-].MEAVVVDAGSSLLK.[A]	1xAcetyl [N-Term]	1xAcetyl [N-Term]	0.000981826	5.15092e-05	0.931	1	2	1	731319928	731319928 [1-14]	731319928 1xAcetyl [N-Term]	731319928 1xAcetyl [N-Term]	PREDICTED: actin-related protein 7 isoform X1 [Beta vulgaris subsp. vulgaris]	1108886280; 731319928	0	1460.77	14		87.5		132.7	75		175.7	340.1	130.3	58.6		175715		245977	240915		421432	894545	401184	308848		461113		698906	395014
FALSE		High	Unambiguous	MEAQLVER	[-].MEAQLVER.[L]	1xAcetyl [N-Term]	1xAcetyl [N-Term]	0.000967076	5.15092e-05	0.933	1	1	6	731358704	731358704 [1-8]	731358704 1xAcetyl [N-Term]	731358704 1xAcetyl [N-Term]	PREDICTED: cyclase-associated protein 1 [Beta vulgaris subsp. vulgaris]	731358704	0	1017.5	8	64.6	12.8	261.8	42.1		37	80.6	207.5	160.9	132.7	1.01788e+06	165181	2.43147e+06	503395		258244	1.24673e+06	3.52112e+06	3.19512e+06	4.51023e+06	2.19707e+06	433471	8.89783e+06	1.43032e+06			1.25902e+06
FALSE		High	Unambiguous	MEAQEGSQNEHLILANKIFLLTHPDVQDIEKVR	[-].MEAQEGSQNEHLILANKIFLLTHPDVQDIEKVR.[L]	1xAcetyl [N-Term]	1xAcetyl [N-Term]	3.37495e-05	5.15092e-05	1.376	1	1	1	731368509	731368509 [1-33]	731368509 1xAcetyl [N-Term]	731368509 1xAcetyl [N-Term]	PREDICTED: 26S proteasome non-ATPase regulatory subunit 6 homolog [Beta vulgaris subsp. vulgaris]	731368509	2	3857.99	33			53.5	82.8			863.7						83749.4	166814			2.25207e+06						306476	473976
FALSE		High	Unambiguous	MEAQEGSQNEHLILANK	[-].MEAQEGSQNEHLILANK.[I]	1xAcetyl [N-Term]	1xAcetyl [N-Term]	3.64057e-05	5.15092e-05	1.366	1	1	4	731368509	731368509 [1-17]	731368509 1xAcetyl [N-Term]	731368509 1xAcetyl [N-Term]	PREDICTED: 26S proteasome non-ATPase regulatory subunit 6 homolog [Beta vulgaris subsp. vulgaris]	731368509	0	1953.93	17			99.3	120.9	43.4	67.5	123.2	242.5	96	207.1			324499	508609	316689	165548	670982	1.44816e+06	670998	2.47646e+06			1.18749e+06	1.44514e+06	519257		807101
FALSE		High	Unambiguous	MEAPKEIFLK	[-].MEAPKEIFLK.[D]	1xAcetyl [N-Term]	1xAcetyl [N-Term]	0.000340161	5.15092e-05	1.071	1	1	1	731331070	731331070 [1-10]	731331070 1xAcetyl [N-Term]	731331070 1xAcetyl [N-Term]	PREDICTED: puromycin-sensitive aminopeptidase-like isoform X2 [Beta vulgaris subsp. vulgaris]	731331070	1	1247.67	10		5.5	4		17.2	124.7	34.5	279.2	209.3	325.5		23392.7	12157.8		116159	283182	173708	1.54288e+06	1.35385e+06	3.60248e+06		61387.5	44490.8		190459		1.38061e+06
FALSE		High	Unambiguous	MEAIVVDAGSKLLK	[-].MEAIVVDAGSKLLK.[A]	1xAcetyl [N-Term]	1xAcetyl [N-Term]	2.01503e-06	5.15092e-05	1.748	1	1	4	731310900	731310900 [1-14]	731310900 1xAcetyl [N-Term]	731310900 1xAcetyl [N-Term]	PREDICTED: actin-related protein 7 [Beta vulgaris subsp. vulgaris]	731310900	1	1515.85	14				288.7	12.1	67.7	155.9	322.8	34.7	118.1				1.99388e+06	144251	272317	1.39281e+06	3.16191e+06	398153	2.31804e+06				5.66533e+06	236520		1.32764e+06
FALSE		High	Unambiguous	MEAILVDSVQNSLR	[-].MEAILVDSVQNSLR.[H]	1xAcetyl [N-Term]	1xAcetyl [N-Term]	0.00100437	5.15092e-05	0.928	1	1	1	731334615	731334615 [1-14]	731334615 1xAcetyl [N-Term]	731334615 1xAcetyl [N-Term]	PREDICTED: cell division cycle protein 27 homolog B [Beta vulgaris subsp. vulgaris]	731334615	0	1616.83	14
FALSE		High	Unambiguous	MEAIEELSQLSDAMRQAAAVLADEDVDDTSVSSSRR	[-].MEAIEELSQLSDAMRQAAAVLADEDVDDTSVSSSRR.[N]	1xAcetyl [N-Term]	1xAcetyl [N-Term]	2.10503e-09	5.15092e-05	2.654	1	1	3	731341935	731341935 [1-36]	731341935 1xAcetyl [N-Term]	731341935 1xAcetyl [N-Term]	PREDICTED: dynamin-2B [Beta vulgaris subsp. vulgaris]	731341935	2	3937.84	36	247.5						77.1	532.3	52.3	90.8	999123						305946	2316072	266406	791316	2.15658e+06
FALSE		High	Unambiguous	MEASRGQNGIQLLLAAEQEAQHIVNTAK	[-].MEASRGQNGIQLLLAAEQEAQHIVNTAK.[T]	1xAcetyl [N-Term]	1xAcetyl [N-Term]	1.05823e-19	5.15092e-05	5.784	1	1	2	731364932	731364932 [1-28]	731364932 1xAcetyl [N-Term]	731364932 1xAcetyl [N-Term]	PREDICTED: V-type proton ATPase subunit G 1 [Beta vulgaris subsp. vulgaris]	731364932	1	3062.57	28	383.1						126.3		172	318.7	923809						299268		522960	1.65864e+06	1.99402e+06
FALSE		High	Unambiguous	MDSHVYPGYVVPPSYDSLLGK	[R].MDSHVYPGYVVPPSYDSLLGK.[L]			9.65754e-08	5.15092e-05	2.149	1	1	11	731351887	731351887 [435-455]			PREDICTED: biotin carboxylase 2, chloroplastic [Beta vulgaris subsp. vulgaris]	731351887	0	2324.13	21	80.4	145.8	74.2	31.3	0.5	120.8	118.3	115.6	156.1	157	3.78274e+06	5644158	2.05898e+06	1.11764e+06	29427	2.51633e+06	5.47233e+06	5.86244e+06	9.26214e+06	1.59486e+07	8.16495e+06	1.48115e+07	7.53472e+06	3.17559e+06	48249.7		1.22679e+07
FALSE		High	Unambiguous	MDSGVLDSIISR	[-].MDSGVLDSIISR.[L]	1xAcetyl [N-Term]	1xAcetyl [N-Term]	1.75815e-06	5.15092e-05	1.766	1	1	2	731320877	731320877 [1-12]	731320877 1xAcetyl [N-Term]	731320877 1xAcetyl [N-Term]	PREDICTED: serine/threonine-protein phosphatase PP1 isozyme 2 [Beta vulgaris subsp. vulgaris]	731320877	0	1334.66	12			100.2				176.5	297.3	141.9	284.1			141515				415322	767241	428487	1.46817e+06			517867
FALSE		High	Unambiguous	MDSFGSSSTSGSSSSQPNPEAIMHQLKNQLAQAYAEEFLETVRGK	[-].MDSFGSSSTSGSSSSQPNPEAIMHQLKNQLAQAYAEEFLETVRGK.[C]	1xAcetyl [N-Term]	1xAcetyl [N-Term]	0.000166905	5.15092e-05	1.165	1	1	1	731331967	731331967 [1-45]	731331967 1xAcetyl [N-Term]	731331967 1xAcetyl [N-Term]	PREDICTED: mitochondrial import inner membrane translocase subunit Tim13 [Beta vulgaris subsp. vulgaris]	731331967	2	4887.28	45
FALSE		High	Unambiguous	MDLLEFLKEECDQR	[R].MDLLEFLKEECDQR.[G]	1xCarbamidomethyl [C11]	1xCarbamidomethyl [C11]	2.81226e-06	5.15092e-05	1.704	1	1	1	731319238	731319238 [185-198]			PREDICTED: ABC transporter I family member 19 [Beta vulgaris subsp. vulgaris]	731319238	1	1825.85	14					826		174								492618		77459.2								807718
FALSE		High	Unambiguous	MDLGSTYHFPAVR	[-].MDLGSTYHFPAVR.[R]	1xAcetyl [N-Term]	1xAcetyl [N-Term]	3.2495e-05	5.15092e-05	1.381	1	1	1	731333839	731333839 [1-13]	731333839 1xAcetyl [N-Term]	731333839 1xAcetyl [N-Term]	PREDICTED: malate synthase, glyoxysomal [Beta vulgaris subsp. vulgaris]	731333839	0	1535.73	13			243.8		20.4		219.4	318.4	197.9				402119		75068.6		602756	959552	697954				1.47153e+06		123086
FALSE		High	Unambiguous	MDIEDLLHHR	[K].MDIEDLLHHR.[T]			0.000260951	5.15092e-05	1.106	1	1	3	731344518	731344518 [380-389]			PREDICTED: acetyl-coenzyme A carboxylase carboxyl transferase subunit alpha, chloroplastic [Beta vulgaris subsp. vulgaris]	731344518	0	1278.63	10	4.9		153.4	10.6		116.2	108	84.2	205.9	316.7	10677.1		198434	17712.6		112794	232819	199001	569458	1.49897e+06	23046.2		726158	50327.6			549908
FALSE		High	Unambiguous	MDLDKWIAK	[-].MDLDKWIAK.[V]	1xAcetyl [N-Term]	1xAcetyl [N-Term]	3.27421e-05	5.15092e-05	1.38	1	1	6	731354470	731354470 [1-9]	731354470 1xAcetyl [N-Term]	731354470 1xAcetyl [N-Term]	PREDICTED: phytochrome-associated serine/threonine-protein phosphatase [Beta vulgaris subsp. vulgaris]	731354470	1	1161.6	9		4.1	31.2	170.5	222.8	68.3	145.7	148.8	111.9	96.7		64972.9	351806	2475968	5.60583e+06	578093	2.73605e+06	3064171	2.69846e+06	3.98763e+06		170503	1.28741e+06	7.0351e+06	9.19156e+06		2.81839e+06
FALSE		High	Unambiguous	MDKSTVHEVVLVGGSTRIPK	[K].MDKSTVHEVVLVGGSTRIPK.[V]			0.00192496	5.15092e-05	0.842	1	1	1	731318762	731318762 [332-351]			PREDICTED: LOW QUALITY PROTEIN: uncharacterized protein LOC104887018 [Beta vulgaris subsp. vulgaris]	731318762	2	2153.17	20						91.5	411.7	406.5	90.3							310173	3.09867e+06	3.35588e+06	872683								1.5122e+06
FALSE		High	Unambiguous	MDKSTVHEVVLVGGSTR	[K].MDKSTVHEVVLVGGSTR.[I]			5.1047e-10	5.15092e-05	2.841	1	1	15	731318762	731318762 [332-348]			PREDICTED: LOW QUALITY PROTEIN: uncharacterized protein LOC104887018 [Beta vulgaris subsp. vulgaris]	731318762	1	1814.94	17	43.8	46.8	4.6	27.9	40.3	337.2	136.1	10.2	152.4	200.7	3.14117e+06	2756182	194907	1.51922e+06	3.79908e+06	1.06993e+07	9.58169e+06	788088	1.37769e+07	31050885	6.78015e+06	7.23281e+06	713250	4.31663e+06	6.22913e+06		5.21627e+07
FALSE		High	Unambiguous	MDKSTVHDVVLVGGSTRIPK	[K].MDKSTVHDVVLVGGSTRIPK.[V]			9.8911e-06	5.15092e-05	1.538	1	1	2	731318762	731318762 [1207-1226]			PREDICTED: LOW QUALITY PROTEIN: uncharacterized protein LOC104887018 [Beta vulgaris subsp. vulgaris]	731318762	2	2139.16	20						76.9	379	446.2	97.9							559777	6.12018e+06	7902032	2.02969e+06								2.7291e+06
FALSE		High	Unambiguous	MDILFAQIQADLR	[-].MDILFAQIQADLR.[S]	1xAcetyl [N-Term]	1xAcetyl [N-Term]	7.08302e-07	5.15092e-05	1.886	1	1	4	731341211	731341211 [1-13]	731341211 1xAcetyl [N-Term]	731341211 1xAcetyl [N-Term]	PREDICTED: protein TPLATE [Beta vulgaris subsp. vulgaris]	731341211	0	1575.82	13		415.8	31.8			189.3	133.3	97.6	103.4	28.8		3239971	177808			793858	1.24093e+06	996638	1.23549e+06	589425		8.50238e+06	650676				3.87032e+06
FALSE		High	Unambiguous	MDKSTVHDVVLVGGSTR	[K].MDKSTVHDVVLVGGSTR.[I]			3.9111e-12	5.15092e-05	3.484	1	1	38	731318762	731318762 [1207-1223]			PREDICTED: LOW QUALITY PROTEIN: uncharacterized protein LOC104887018 [Beta vulgaris subsp. vulgaris]	731318762	1	1800.93	17	30.7	29.2	23.6	21.2	6	249.1	170.3	106.8	162	201.1	6.25633e+06	4.89732e+06	2.84336e+06	3.28775e+06	1.60569e+06	2.24986e+07	3.4145e+07	2.34922e+07	4.1695e+07	8.8546e+07	1.35041e+07	1.28516e+07	1.04051e+07	9.34167e+06	2.63275e+06		1.09688e+08
FALSE		High	Unambiguous	MDKSLDMSLDDIIK	[-].MDKSLDMSLDDIIK.[S]	1xAcetyl [N-Term]	1xAcetyl [N-Term]	2.07459e-08	5.15092e-05	2.352	1	1	5	731367879	731367879 [1-14]	731367879 1xAcetyl [N-Term]	731367879 1xAcetyl [N-Term]	PREDICTED: THO complex subunit 4D [Beta vulgaris subsp. vulgaris]	731367879	1	1665.81	14	2.3		18.7	13	8.9	200.9	244.2	284	142.2	85.8	36264.7		175863	157294	186070	1.41477e+06	3.81769e+06	4868911	2.85398e+06	2946610	78276.5		643560	446926	305088		6.89747e+06
FALSE		High	Unambiguous	MDKNSVHDVVLVGGSTR	[K].MDKNSVHDVVLVGGSTR.[I]			2.82534e-11	5.15092e-05	3.223	1	1	28	731349044	731349044 [332-348]			PREDICTED: heat shock cognate 70 kDa protein 2 [Beta vulgaris subsp. vulgaris]	731349044	1	1813.92	17	82	65.9	72.3	78.4	81.6	203.5	114.8	76.2	90.7	134.7	1.26092e+07	8.34381e+06	6.56097e+06	9.15775e+06	1.65204e+07	1.38619e+07	1.73511e+07	1.26403e+07	1.75928e+07	4.4712e+07	2.72166e+07	2.18959e+07	2.40095e+07	2.60204e+07	2.70875e+07		6.75816e+07
FALSE		High	Unambiguous	MDKNMLGDLDNLPEEDKMK	[-].MDKNMLGDLDNLPEEDKMK.[M]	1xAcetyl [N-Term]	1xAcetyl [N-Term]	1.61662e-07	5.15092e-05	2.081	1	1	6	731334059	731334059 [1-19]	731334059 1xAcetyl [N-Term]	731334059 1xAcetyl [N-Term]	PREDICTED: mitochondrial import inner membrane translocase subunit Tim9 [Beta vulgaris subsp. vulgaris]	731334059	2	2278.04	19							315.2	304.5	380.3								5192208	5501036	8.0419e+06
FALSE		High	Unambiguous	MDHAADATRTDLMTITR	[-].MDHAADATRTDLMTITR.[F]	1xAcetyl [N-Term]	1xAcetyl [N-Term]	0.000290142	5.15092e-05	1.092	1	1	2	731313510	731313510 [1-17]	731313510 1xAcetyl [N-Term]	731313510 1xAcetyl [N-Term]	PREDICTED: fructose-1,6-bisphosphatase, cytosolic [Beta vulgaris subsp. vulgaris]	731313510	1	1960.92	17		47.9	36.4	385.4	71.8	147		1.8		309.7		109849	59920.4	816843	263503	181565		5392.7		1.86503e+06		288268	219275	2.32094e+06	432051		885187
FALSE		High	Unambiguous	MDGYNNDTTDR	[-].MDGYNNDTTDR.[G]	1xAcetyl [N-Term]	1xAcetyl [N-Term]	2.51159e-05	5.15092e-05	1.415	1	1	3	731312287	731312287 [1-11]	731312287 1xAcetyl [N-Term]	731312287 1xAcetyl [N-Term]	PREDICTED: glycine-rich protein A3 [Beta vulgaris subsp. vulgaris]	731312287	0	1343.52	11	48.8	10.2	133.6	105.7	173.2	13.5		154.7	152.2	208.2	136895	23609.5	220875	225024	638996	16693.5		467302	538029	1.26005e+06	295484	61956.5	808278	639373	1.04773e+06		81386.5
FALSE		High	Unambiguous	MDGVSGPSTQAQPSSLDKSR	[-].MDGVSGPSTQAQPSSLDKSR.[V]	1xAcetyl [N-Term]	1xAcetyl [N-Term]	2.19141e-05	5.15092e-05	1.433	1	1	4	731365708	731365708 [1-20]	731365708 1xAcetyl [N-Term]	731365708 1xAcetyl [N-Term]	PREDICTED: histone-lysine N-methyltransferase, H3 lysine-9 specific SUVH1 [Beta vulgaris subsp. vulgaris]	731365708	1	2089.98	20	9	31.8	13.7	58	106.5	29.8	87.1	345.8	114.8	203.6	51077.2	148502	46079.8	250431	796901	75118.7	486566	2.11906e+06	823236	2.49912e+06	110249	389700	168626	711561	1.30663e+06		366228
FALSE		High	Unambiguous	MDGLGGSSTETPVSK	[-].MDGLGGSSTETPVSK.[K]	1xAcetyl [N-Term]	1xAcetyl [N-Term]	0.0003988	5.15092e-05	1.05	1	1	3	731358630	731358630 [1-15]	731358630 1xAcetyl [N-Term]	731358630 1xAcetyl [N-Term]	PREDICTED: protein RER1B [Beta vulgaris subsp. vulgaris]	731358630	0	1507.69	15	142.5	36.3	381.9	353.5		28.6		57.2			360363	75500.8	569719	679178		32045.3		155911			777836	198130	2.08485e+06	1.92978e+06			156231
FALSE		High	Unambiguous	MDKSLDMSLDDIIKSK	[-].MDKSLDMSLDDIIKSK.[K]	1xAcetyl [N-Term]	1xAcetyl [N-Term]	4.96396e-06	5.15092e-05	1.629	1	1	2	731367879	731367879 [1-16]	731367879 1xAcetyl [N-Term]	731367879 1xAcetyl [N-Term]	PREDICTED: THO complex subunit 4D [Beta vulgaris subsp. vulgaris]	731367879	2	1880.93	16		6.6		100.3		53.8	229	253.4	179.7	177.3		51475.6		727619		227521	2.14943e+06	2.60795e+06	2.16493e+06	3.6553e+06		135083		2.06742e+06			1.10924e+06
FALSE		High	Unambiguous	MDINADSFISDKSAK	[-].MDINADSFISDKSAK.[I]	1xAcetyl [N-Term]	1xAcetyl [N-Term]	2.70926e-05	5.15092e-05	1.405	1	1	1	1108967185	1108967185 [1-15]	1108967185 1xAcetyl [N-Term]	1108967185 1xAcetyl [N-Term]	PREDICTED: putative GDP-L-fucose synthase 2 [Beta vulgaris subsp. vulgaris]	1108967185	1	1683.79	15			71.7	314.6	50.7			247.9		315.1			71471.4	403669	112846			451305		1.14883e+06			261545	1.14697e+06	185026
FALSE		High	Unambiguous	MDLQLTAEEMEER	[R].MDLQLTAEEMEER.[K]			6.46748e-07	5.15092e-05	1.898	1	1	6	1108913955	1108913955 [567-579]			PREDICTED: dihydroxy-acid dehydratase, chloroplastic [Beta vulgaris subsp. vulgaris]	1108913955	0	1594.71	13		6.5		49.7	20.6	148	205.9	116.3	128.1	324.8		37210.9		261273	188045	453541	1.40002e+06	867200	1.11839e+06	4.85085e+06		97649.5		742369	308327		2.21116e+06
FALSE		High	Unambiguous	MDISEEIR	[-].MDISEEIR.[A]	1xAcetyl [N-Term]	1xAcetyl [N-Term]	0.000203237	5.15092e-05	1.139	2	4	10	731362775; 731350744	731362775 [1-8]; 731350744 [1-8]	731362775 1xAcetyl [N-Term]; 731350744 1xAcetyl [N-Term]	731362775 1xAcetyl [N-Term]; 731350744 1xAcetyl [N-Term]	PREDICTED: eukaryotic peptide chain release factor GTP-binding subunit ERF3A isoform X3 [Beta vulgaris subsp. vulgaris] PREDICTED: eukaryotic peptide chain release factor GTP-binding subunit ERF3A isoform X2 [Beta vulgaris subsp. vulgaris]	731362775; 731350742; 1108787299; 731350744	0	1034.48	8	34		177.7	116.2	29.7		136.7	163	145.7	196.9	428657		1.32101e+06	1.11229e+06	492927		1.69279e+06	2.21371e+06	2.31607e+06	5355000	925246		4.83417e+06	3.16042e+06	808224
FALSE		High	Unambiguous	MDSFGSSSTSGSSSSQPNPEAIMHQLKNQLAQAYAEEFLETVR	[-].MDSFGSSSTSGSSSSQPNPEAIMHQLKNQLAQAYAEEFLETVR.[G]	1xAcetyl [N-Term]	1xAcetyl [N-Term]	6.62002e-06	5.15092e-05	1.591	1	1	1	731331967	731331967 [1-43]	731331967 1xAcetyl [N-Term]	731331967 1xAcetyl [N-Term]	PREDICTED: mitochondrial import inner membrane translocase subunit Tim13 [Beta vulgaris subsp. vulgaris]	731331967	1	4702.17	43							210.5	447.5		342							297122	692734		1.06034e+06
FALSE		High	Unambiguous	MDSDFGIPRELSDLQKQR	[-].MDSDFGIPRELSDLQKQR.[S]	1xAcetyl [N-Term]	1xAcetyl [N-Term]	6.76031e-09	5.15092e-05	2.5	1	1	11	731314194	731314194 [1-18]	731314194 1xAcetyl [N-Term]	731314194 1xAcetyl [N-Term]	PREDICTED: pyrophosphate--fructose 6-phosphate 1-phosphotransferase subunit alpha [Beta vulgaris subsp. vulgaris]	731314194	2	2177.07	18	0.4			6.6	0.6	129.4	232.9	328.9	79.7	221.4	27791.5			366749	58557.7	4.1904e+06	16735325	2.59203e+07	7.35351e+06	34944055	59987.2			1.04206e+06	96013.6		2.04296e+07
FALSE		High	Unambiguous	MDSDFGIPRELSDLQK	[-].MDSDFGIPRELSDLQK.[Q]	1xAcetyl [N-Term]	1xAcetyl [N-Term]	3.41652e-10	5.15092e-05	2.894	1	1	11	731314194	731314194 [1-16]	731314194 1xAcetyl [N-Term]	731314194 1xAcetyl [N-Term]	PREDICTED: pyrophosphate--fructose 6-phosphate 1-phosphotransferase subunit alpha [Beta vulgaris subsp. vulgaris]	731314194	1	1892.91	16				17.4		29.6	269.6	338.8	184	160.7				445069		441756	8945462	1.23255e+07	7.83307e+06	1.17123e+07				1.2646e+06			2.15371e+06
FALSE		High	Unambiguous	MDSDFGIPR	[-].MDSDFGIPR.[E]	1xAcetyl [N-Term]	1xAcetyl [N-Term]	1.97088e-05	5.15092e-05	1.447	1	1	24	731314194	731314194 [1-9]	731314194 1xAcetyl [N-Term]	731314194 1xAcetyl [N-Term]	PREDICTED: pyrophosphate--fructose 6-phosphate 1-phosphotransferase subunit alpha [Beta vulgaris subsp. vulgaris]	731314194	0	1079.48	9	45.1	2.5	62.9	175.6	62.5	59.4	131.3	132.1	150.3	178.3	3.34908e+06	150309	2.75816e+06	9.91444e+06	6.11856e+06	1.95603e+06	9.58768e+06	1.05834e+07	1.40846e+07	2.86098e+07	7.22891e+06	394444	1.00933e+07	2.81704e+07	1.00322e+07		9.5363e+06
FALSE		High	Unambiguous	MDRGLFHHR	[-].MDRGLFHHR.[K]	1xAcetyl [N-Term]	1xAcetyl [N-Term]	7.09094e-05	5.15092e-05	1.278	1	1	5	731313572	731313572 [1-9]	731313572 1xAcetyl [N-Term]	731313572 1xAcetyl [N-Term]	PREDICTED: stress protein DDR48 [Beta vulgaris subsp. vulgaris]	731313572	1	1210.59	9						85.3	259.6	515.7	72.6	66.8						373029	2.51988e+06	5490460	904876	1.42485e+06							1.81864e+06
FALSE		High	Unambiguous	MDREWGSKPGSGGAASSQNEAIDRR	[-].MDREWGSKPGSGGAASSQNEAIDRR.[E]	1xAcetyl [N-Term]	1xAcetyl [N-Term]	6.137e-06	5.15092e-05	1.601	1	1	3	731368751	731368751 [1-25]	731368751 1xAcetyl [N-Term]	731368751 1xAcetyl [N-Term]	PREDICTED: splicing factor 3A subunit 2 [Beta vulgaris subsp. vulgaris]	731368751	2	2704.25	25	5.8	11.1	52.1		4.5	270	53	110.5	158.9	334.2	50870.4	79664.9	268536		51564.9	1.04494e+06	454872	1.04086e+06	1.75172e+06	6305252	109803	209058	982692		84548.1		5.09443e+06
FALSE		High	Unambiguous	MDRCFLELQVDGEEAYTTFQK	[K].MDRCFLELQVDGEEAYTTFQK.[V]	1xCarbamidomethyl [C4]	1xCarbamidomethyl [C4]	0.000759045	5.15092e-05	0.965	1	2	2	731362937	731362937 [160-180]			PREDICTED: elongation factor 2 [Beta vulgaris subsp. vulgaris]	731362937; 733214592	1	2580.17	21
FALSE		High	Unambiguous	MDQSLLDDIIR	[-].MDQSLLDDIIR.[R]	1xAcetyl [N-Term]	1xAcetyl [N-Term]	0.000453592	5.15092e-05	1.033	1	1	2	731328441	731328441 [1-11]	731328441 1xAcetyl [N-Term]	731328441 1xAcetyl [N-Term]	PREDICTED: serine/threonine-protein phosphatase PP1 [Beta vulgaris subsp. vulgaris]	731328441	0	1360.68	11	60.2	49.3		235.1	59.4	352.7	26.3	167.4	28.3	21.3	190058	127929		563888	246800	492926	81575	569683	112512	145272	410236	335714		1.6022e+06	404663		2.40318e+06
FALSE		High	Unambiguous	MDQANDSGLASYVAGQIDR	[K].MDQANDSGLASYVAGQIDR.[S]			1.21149e-08	5.15092e-05	2.423	1	2	3	731365529	731365529 [191-209]			PREDICTED: peroxisomal (S)-2-hydroxy-acid oxidase isoform X1 [Beta vulgaris subsp. vulgaris]	731365529; 731365533	0	2010.92	19				204.6	149.8			208.6	148.5	288.5				351645	446049			508777	423712	1.40923e+06				999148	731362
FALSE		High	Unambiguous	MDPNPTNFPILSYVMSR	[-].MDPNPTNFPILSYVMSR.[L]	1xAcetyl [N-Term]	1xAcetyl [N-Term]	2.00097e-05	5.15092e-05	1.445	1	1	1	731335729	731335729 [1-17]	731335729 1xAcetyl [N-Term]	731335729 1xAcetyl [N-Term]	PREDICTED: plant intracellular Ras-group-related LRR protein 9 [Beta vulgaris subsp. vulgaris]	731335729	0	2023.96	17	374.6	225.5	275.8	23.6	39.5			25.9	18.3	16.7	6871809	3402437	2.98437e+06	329225	953956			511514	422213	661842	1.48326e+07	8.92872e+06	1.09211e+07	935445	1.56415e+06
FALSE		High	Unambiguous	MDNVSGPSLYPLHR	[-].MDNVSGPSLYPLHR.[C]	1xAcetyl [N-Term]	1xAcetyl [N-Term]	0.0014662	5.15092e-05	0.878	1	1	3	1108985782	1108985782 [1-14]	1108985782 1xAcetyl [N-Term]	1108985782 1xAcetyl [N-Term]	PREDICTED: phosphoglycerate mutase-like protein 1 [Beta vulgaris subsp. vulgaris]	1108985782	0	1627.79	14	9.5		23.8	103		174	48	199.7	107.5	334.6	91458.7		134635	750730		739201	452997	2.06517e+06	1.30124e+06	6.93119e+06	197411		492687	2.13309e+06			3.60385e+06
FALSE		High	Unambiguous	MDNFYTVTVYEK	[K].MDNFYTVTVYEK.[G]			1.95488e-06	5.15092e-05	1.752	1	2	9	731331070	731331070 [376-387]			PREDICTED: puromycin-sensitive aminopeptidase-like isoform X2 [Beta vulgaris subsp. vulgaris]	731331070; 731331066	0	1509.69	12	91.7	128.3	25	214.3	86.1	158.3	44.4	95.9	132.7	23.3	1.56495e+06	1.80046e+06	252155	2.77819e+06	1.93461e+06	1.19596e+06	745455	1.76378e+06	2.85563e+06	859434	3.37791e+06	4.7248e+06	922746	7.89381e+06	3.17206e+06		5.83071e+06
FALSE		High	Unambiguous	MDNFTTAAAK	[-].MDNFTTAAAK.[T]	1xAcetyl [N-Term]	1xAcetyl [N-Term]	0.000143441	5.15092e-05	1.185	1	1	1	731339037	731339037 [1-10]	731339037 1xAcetyl [N-Term]	731339037 1xAcetyl [N-Term]	PREDICTED: plant intracellular Ras-group-related LRR protein 4 [Beta vulgaris subsp. vulgaris]	731339037	0	1111.51	10	22.8	12.3		56.4	33	34.7	160.7	235.4	165.9	278.8	76157.8	33765.8		143157	145085	51237.2	527239	847339	698560	2.00966e+06	164385	88608.8		406760	237887		249798
FALSE		High	Unambiguous	MDMGSDFDRLLFFEHARK	[-].MDMGSDFDRLLFFEHARK.[S]	1xAcetyl [N-Term]	1xAcetyl [N-Term]	7.41243e-07	5.15092e-05	1.88	1	1	1	731338086	731338086 [1-18]	731338086 1xAcetyl [N-Term]	731338086 1xAcetyl [N-Term]	PREDICTED: mitochondrial import receptor subunit TOM20 [Beta vulgaris subsp. vulgaris]	731338086	2	2257.05	18						710.2				289.8						614450				1.22213e+06							2.99565e+06
FALSE		High	Unambiguous	MDMGSDFDRLLFFEHAR	[-].MDMGSDFDRLLFFEHAR.[K]	1xAcetyl [N-Term]; 1xOxidation [M3]	1xAcetyl [N-Term]; 1xOxidation [M3]	8.24665e-06	5.15092e-05	1.562	1	1	8	731338086	731338086 [1-17]	731338086 1xAcetyl [N-Term]	731338086 1xAcetyl [N-Term]	PREDICTED: mitochondrial import receptor subunit TOM20 [Beta vulgaris subsp. vulgaris]	731338086	1	2144.95	17	26.1				7.3	662.7	235.2	35.4	12	21.3	454714				167386	5.10898e+06	4.02376e+06	664774	263300	798716	981490				274453		2.4908e+07
FALSE		High	Unambiguous	MDMGSDFDRLLFFEHAR	[-].MDMGSDFDRLLFFEHAR.[K]	1xAcetyl [N-Term]	1xAcetyl [N-Term]	1.80906e-09	5.15092e-05	2.674	1	1	30	731338086	731338086 [1-17]	731338086 1xAcetyl [N-Term]	731338086 1xAcetyl [N-Term]	PREDICTED: mitochondrial import receptor subunit TOM20 [Beta vulgaris subsp. vulgaris]	731338086	1	2128.96	17	3.4	5.3	7.5	2.2	26.9	335.3	175.1	117.5	143.9	182.9	248956	317456	320204	119132	2.57669e+06	1.08013e+07	1.2521e+07	9.21687e+06	1.32103e+07	2.87261e+07	537365	833074	1.17177e+06	338497	4.22486e+06		5.26598e+07
FALSE		High	Unambiguous	MDMDTDENVKR	[-].MDMDTDENVKR.[V]	1xAcetyl [N-Term]	1xAcetyl [N-Term]	0.000273083	5.15092e-05	1.1	1	1	1	731363013	731363013 [1-11]	731363013 1xAcetyl [N-Term]	731363013 1xAcetyl [N-Term]	PREDICTED: ribosome biogenesis protein WDR12 homolog [Beta vulgaris subsp. vulgaris]	731363013	1	1395.59	11	8.9		19.7			35.5	164.6	298.8	215.5	256.9	26071.4		34236.7			46332.5	476420	948526	800671	1.63351e+06	56274.4		125287				225886
FALSE		High	Unambiguous	MEDWEDDSVPQLLK	[-].MEDWEDDSVPQLLK.[K]	1xAcetyl [N-Term]	1xAcetyl [N-Term]	0.000856776	5.15092e-05	0.949	1	1	3	731338023	731338023 [1-14]	731338023 1xAcetyl [N-Term]	731338023 1xAcetyl [N-Term]	PREDICTED: eukaryotic translation initiation factor 3 subunit J [Beta vulgaris subsp. vulgaris]	731338023	0	1746.79	14	50.2		167.8	73.8			76.9	309.6	152.6	169.2	340912		672728	380846			513227	2.26711e+06	1.30742e+06	2.48178e+06	735851		2.46181e+06	1.08212e+06
FALSE		High	Unambiguous	MDGHDSDDPKQNTTDMTVFVQNLLQQMQTR	[-].MDGHDSDDPKQNTTDMTVFVQNLLQQMQTR.[F]	1xAcetyl [N-Term]; 1xPhospho [D/S]	1xAcetyl [N-Term]; 1xPhospho [D5; S6; D7; D8]	2.24179e-05	5.15092e-05	1.43	1	1	9	731346539	731346539 [1-30]	731346539 1xAcetyl [N-Term]; 1xPhospho [D5; S6; D7; D8]	731346539 1xAcetyl [N-Term]; 1xPhospho [D/S]	PREDICTED: heat shock factor-binding protein 1 [Beta vulgaris subsp. vulgaris]	731346539	1	3615.55	30								506.6	201.3	292.1								796463	370307	919844
FALSE		High	Unambiguous	MEDWEDDSVPQLLKK	[-].MEDWEDDSVPQLLKK.[D]	1xAcetyl [N-Term]	1xAcetyl [N-Term]	2.83364e-06	5.15092e-05	1.703	1	1	7	731338023	731338023 [1-15]	731338023 1xAcetyl [N-Term]	731338023 1xAcetyl [N-Term]	PREDICTED: eukaryotic translation initiation factor 3 subunit J [Beta vulgaris subsp. vulgaris]	731338023	1	1874.88	15	10	67.8			224.7		114.7	213.4	123.8	245.7	238808	1.33238e+06			7064350		2.69244e+06	5492754	3.7282e+06	12668875	515460	3.49645e+06			1.1583e+07
FALSE		High	Unambiguous	MEEALELAR	[-].MEEALELAR.[A]	1xAcetyl [N-Term]	1xAcetyl [N-Term]	1.34942e-05	5.15092e-05	1.497	1	1	3	731347294	731347294 [1-9]	731347294 1xAcetyl [N-Term]	731347294 1xAcetyl [N-Term]	PREDICTED: LOW QUALITY PROTEIN: CLIP-associated protein [Beta vulgaris subsp. vulgaris]	731347294	0	1103.54	9	7.4	17.5	72.4	124.8	4.8		247.4	258.7	90.8	176.1	32788.4	63486.6	188025	417281	27810		1.0701e+06	1.22698e+06	504168	1.67319e+06	70773	166603	688065	1.18564e+06	45598.5
FALSE		High	Unambiguous	MESIGVLLACPMNSYLEEELNKR	[-].MESIGVLLACPMNSYLEEELNKR.[Y]	1xAcetyl [N-Term]; 1xCarbamidomethyl [C10]	1xAcetyl [N-Term]; 1xCarbamidomethyl [C10]	3.83445e-07	5.15092e-05	1.967	1	2	2	731359538	731359538 [1-23]	731359538 1xAcetyl [N-Term]	731359538 1xAcetyl [N-Term]	PREDICTED: hydroxyphenylpyruvate reductase isoform X1 [Beta vulgaris subsp. vulgaris]	731359540; 731359538	1	2738.32	23	66	260.3	136.2	84.6				132	144	176.9	634296	2.05659e+06	772010	617243				1.36623e+06	1.74465e+06	3.66891e+06	1.36911e+06	5.39692e+06	2.82512e+06	1.7538e+06
FALSE		High	Unambiguous	MESELVELFEAAKK	[-].MESELVELFEAAKK.[A]	1xAcetyl [N-Term]	1xAcetyl [N-Term]	5.90196e-08	5.15092e-05	2.214	1	1	6	731323512	731323512 [1-14]	731323512 1xAcetyl [N-Term]	731323512 1xAcetyl [N-Term]	PREDICTED: transcription elongation factor TFIIS [Beta vulgaris subsp. vulgaris]	731323512	1	1665.84	14	44.8	19.2	36.7	8.3	170.5	269	88.7	113.7	105	144	1.16881e+06	412835	564297	165026	5857054	3.10777e+06	2.27399e+06	3.19717e+06	3.45501e+06	8.10917e+06	2.52284e+06	1.08337e+06	2.06501e+06	468896	9.60347e+06		1.51514e+07
FALSE		High	Unambiguous	MESEGILLGMGNPLLDISAVVDDEFLHKYDIK	[-].MESEGILLGMGNPLLDISAVVDDEFLHKYDIK.[L]	1xAcetyl [N-Term]; 1xOxidation [M10]	1xAcetyl [N-Term]; 1xOxidation [M10]	2.80896e-08	5.15092e-05	2.312	1	1	7	731334184	731334184 [1-32]	731334184 1xAcetyl [N-Term]	731334184 1xAcetyl [N-Term]	PREDICTED: adenosine kinase 2 [Beta vulgaris subsp. vulgaris]	731334184	1	3619.79	32	103.4	200.8	230.6	274.9	35		30.5	93.9	30.8		2.26641e+06	3.62159e+06	2.98255e+06	4.57909e+06	1.01141e+06		657328	2.21861e+06	853075		4.892e+06	9.50382e+06	1.09145e+07	1.30108e+07	1.65834e+06
FALSE		High	Unambiguous	MESEGILLGMGNPLLDISAVVDDEFLHKYDIK	[-].MESEGILLGMGNPLLDISAVVDDEFLHKYDIK.[L]	1xAcetyl [N-Term]	1xAcetyl [N-Term]	5.53533e-14	5.15092e-05	4.046	1	1	38	731334184	731334184 [1-32]	731334184 1xAcetyl [N-Term]	731334184 1xAcetyl [N-Term]	PREDICTED: adenosine kinase 2 [Beta vulgaris subsp. vulgaris]	731334184	1	3603.8	32	128.3	141.3	57.4	84.6	15.5	111.1	136.4	126.3	129.4	69.8	71284293	6.45579e+07	1.88058e+07	35714819	1.1311e+07	2.73191e+07	74452989	7.5614e+07	9.06457e+07	83730213	1.53865e+08	1.69414e+08	6.88188e+07	1.01478e+08	1.85459e+07		1.3319e+08
FALSE		High	Unambiguous	MESEGILLGMGNPLLDISAVVDDEFLHK	[-].MESEGILLGMGNPLLDISAVVDDEFLHK.[Y]	1xAcetyl [N-Term]; 1xOxidation [M10]	1xAcetyl [N-Term]; 1xOxidation [M10]	2.85352e-07	5.15092e-05	2.006	1	1	2	731334184	731334184 [1-28]	731334184 1xAcetyl [N-Term]	731334184 1xAcetyl [N-Term]	PREDICTED: adenosine kinase 2 [Beta vulgaris subsp. vulgaris]	731334184	0	3100.52	28		422.3			337.8	195	44.9					2193792			2.80881e+06	545314	278904					5.75698e+06			4.60545e+06		2.65858e+06
FALSE		High	Unambiguous	MESEGILLGMGNPLLDISAVVDDEFLHK	[-].MESEGILLGMGNPLLDISAVVDDEFLHK.[Y]	1xAcetyl [N-Term]	1xAcetyl [N-Term]	2.26804e-11	5.15092e-05	3.252	1	1	13	731334184	731334184 [1-28]	731334184 1xAcetyl [N-Term]	731334184 1xAcetyl [N-Term]	PREDICTED: adenosine kinase 2 [Beta vulgaris subsp. vulgaris]	731334184	0	3084.53	28	257.7	344.1	110.2	129.5	47	13.8	20.6	30	32.3	14.8	2.41785e+07	26559060	6.0971e+06	9.23333e+06	5.80046e+06	575086	1.89946e+06	3.03039e+06	3.81924e+06	2.99637e+06	5.21886e+07	6.96967e+07	2.2312e+07	2.62351e+07	9.51069e+06		2.80374e+06
FALSE		High	Unambiguous	MERRPSITVKDVSPHDFVK	[-].MERRPSITVKDVSPHDFVK.[A]	1xAcetyl [N-Term]	1xAcetyl [N-Term]	0.000889823	5.15092e-05	0.944	1	1	2	731362984	731362984 [1-19]	731362984 1xAcetyl [N-Term]	731362984 1xAcetyl [N-Term]	PREDICTED: 40S ribosomal protein S19-2 [Beta vulgaris subsp. vulgaris]	731362984	2	2283.19	19						75.5	329.7	201.1		393.6						94297.9	913489	611175		2.39524e+06							459733
FALSE		High	Unambiguous	MESLINEEFGEVK	[-].MESLINEEFGEVK.[A]	1xAcetyl [N-Term]	1xAcetyl [N-Term]	6.27442e-07	5.15092e-05	1.902	1	1	7	731314726	731314726 [1-13]	731314726 1xAcetyl [N-Term]	731314726 1xAcetyl [N-Term]	PREDICTED: calcium-transporting ATPase 1, chloroplastic [Beta vulgaris subsp. vulgaris]	731314726	0	1566.74	13	112.8	35	76.2	122.9	355.1	55.2	65.9	61.4	46.9	68.5	2.60669e+06	665608	1.03954e+06	2.15852e+06	1.08058e+07	565332	1.49805e+06	1.52876e+06	1.36799e+06	3.4194e+06	5.62648e+06	1.7467e+06	3.80412e+06	6.1331e+06	1.77177e+07		2.75618e+06
FALSE		High	Unambiguous	MEQTFIMIKPDGVQR	[-].MEQTFIMIKPDGVQR.[G]	1xAcetyl [N-Term]; 1xOxidation [M7]	1xAcetyl [N-Term]; 1xOxidation [M7]	1.23215e-05	5.15092e-05	1.509	1	1	17	731360835	731360835 [1-15]	731360835 1xAcetyl [N-Term]	731360835 1xAcetyl [N-Term]	PREDICTED: nucleoside diphosphate kinase 1 [Beta vulgaris subsp. vulgaris]	731360835	0	1850.91	15	27.6		36.1	149	23.1	89.9	94.9	176.9	112.7	289.7	605605		466589	2.47982e+06	664864	872166	2.04308e+06	4.1764e+06	3.11256e+06	1.3697e+07	1.30718e+06		1.70745e+06	7.04605e+06	1.09014e+06		4.2521e+06
FALSE		High	Unambiguous	MEQLLNLDVTPFTDK	[R].MEQLLNLDVTPFTDK.[I]			1.31833e-06	5.15092e-05	1.804	1	1	3	731372394	731372394 [63-77]			PREDICTED: glutamine synthetase leaf isozyme, chloroplastic [Beta vulgaris subsp. vulgaris]	731372394	0	1763.89	15	187.8	207.5	45.3	28.1	293.8	74.5	56.8	7.5	25	73.5	4.27266e+06	3.88394e+06	608499	485447	8.79871e+06	750868	1.27102e+06	184968	718728	3.60781e+06	9.22244e+06	1.01923e+07	2.22677e+06	1.37932e+06	1.44267e+07		3.66073e+06
FALSE		High	Unambiguous	MEQDGTDESLQVR	[K].MEQDGTDESLQVR.[A]			7.13689e-07	5.15092e-05	1.885	1	2	3	731358082	731358082 [659-671]			PREDICTED: epidermal growth factor receptor substrate 15-like 1 isoform X1 [Beta vulgaris subsp. vulgaris]	731358082; 731358084	0	1507.67	13	41.9	35.1	218.3	235.2	161.9				137.3	170.3	207408	142802	636966	884069	1.05425e+06				856813	1.81913e+06	447685	374744	2.33094e+06	2.51195e+06	1.72859e+06
FALSE		High	Unambiguous	MEPEPSNTGAGNPSEHRK	[-].MEPEPSNTGAGNPSEHRK.[E]	1xAcetyl [N-Term]	1xAcetyl [N-Term]	1.07319e-08	5.15092e-05	2.439	1	1	7	731356662	731356662 [1-18]	731356662 1xAcetyl [N-Term]	731356662 1xAcetyl [N-Term]	PREDICTED: 26S proteasome non-ATPase regulatory subunit 2 homolog A [Beta vulgaris subsp. vulgaris]	731356662	1	1979.89	18	57.9		130.2	83.3	26.9	330.5	110	119.2	74.3	67.7	437457		580169	478146	267866	1.10577e+06	816608	970866	707707	1.10378e+06	944241		2.12309e+06	1.35858e+06	439204		5.39102e+06
FALSE		High	Unambiguous	MEPAVLDDIINR	[-].MEPAVLDDIINR.[L]	1xAcetyl [N-Term]	1xAcetyl [N-Term]	0.000203237	5.15092e-05	1.139	1	1	1	731348802	731348802 [1-12]	731348802 1xAcetyl [N-Term]	731348802 1xAcetyl [N-Term]	PREDICTED: serine/threonine-protein phosphatase PP1 isozyme 2 [Beta vulgaris subsp. vulgaris]	731348802	0	1427.72	12				166.8			211.9	258	255.3	108				644646			1.05954e+06	1.41479e+06	1.63783e+06	1.18583e+06				1.83167e+06
FALSE		High	Unambiguous	MENSADDAAKSVANLSMDSNPNSQESETLSK	[-].MENSADDAAKSVANLSMDSNPNSQESETLSK.[N]	1xAcetyl [N-Term]	1xAcetyl [N-Term]	2.0422e-09	5.15092e-05	2.658	1	1	1	731323066	731323066 [1-31]	731323066 1xAcetyl [N-Term]	731323066 1xAcetyl [N-Term]	PREDICTED: lysine--tRNA ligase [Beta vulgaris subsp. vulgaris]	731323066	1	3312.45	31							216.9	266.4	241	275.7							799062	1.07648e+06	1.13952e+06	2.23066e+06
FALSE		High	Unambiguous	MENSADDAAK	[-].MENSADDAAK.[S]	1xAcetyl [N-Term]	1xAcetyl [N-Term]	0.000204782	5.15092e-05	1.138	1	2	2	731323066	731323066 [1-10]	731323066 1xAcetyl [N-Term]	731323066 1xAcetyl [N-Term]	PREDICTED: lysine--tRNA ligase [Beta vulgaris subsp. vulgaris]	731323066; 731323070	0	1093.45	10	8.7	203.9	80.7		318.2	232		48	108.5		16219.3	313293	88965.8		782664	191870		96686	255565		35009.1	822148	325565		1.28329e+06		935430
FALSE		High	Unambiguous	MENRLNMSLDDLIK	[-].MENRLNMSLDDLIK.[I]	1xAcetyl [N-Term]	1xAcetyl [N-Term]	8.63467e-05	5.15092e-05	1.252	1	2	3	731349080	731349080 [1-14]	731349080 1xAcetyl [N-Term]	731349080 1xAcetyl [N-Term]	PREDICTED: THO complex subunit 4B isoform X1 [Beta vulgaris subsp. vulgaris]	1108958369; 731349080	1	1733.86	14	6.5		62.8	148.7	23.2	77.9	165	139.4	82.2	294.4	81156.7		462568	1.41111e+06	382211	431052	2026104	1.87659e+06	1.29526e+06	7.94021e+06	175175		1.69274e+06	4.00945e+06	626690		2.10152e+06
FALSE		High	Unambiguous	MEQTFIMIKPDGVQR	[-].MEQTFIMIKPDGVQR.[G]	1xAcetyl [N-Term]	1xAcetyl [N-Term]	1.07319e-08	5.15092e-05	2.439	1	1	49	731360835	731360835 [1-15]	731360835 1xAcetyl [N-Term]	731360835 1xAcetyl [N-Term]	PREDICTED: nucleoside diphosphate kinase 1 [Beta vulgaris subsp. vulgaris]	731360835	0	1834.92	15	56.6	78.8	36.2	124.6	26.2	123.2	158.7	161	121.7	112.9	1.35297e+07	1.54864e+07	5.10352e+06	2.26129e+07	8.24587e+06	1.30359e+07	3.72732e+07	4.14725e+07	3.66818e+07	5.82173e+07	2.92035e+07	4.06397e+07	1.8676e+07	6.42513e+07	1.35203e+07		6.35544e+07
FALSE		High	Unambiguous	MENRDFDSDDHFEDCLIK	[-].MENRDFDSDDHFEDCLIK.[L]	1xAcetyl [N-Term]; 1xCarbamidomethyl [C15]	1xAcetyl [N-Term]; 1xCarbamidomethyl [C15]	5.4364e-06	5.15092e-05	1.617	1	1	5	731311965	731311965 [1-18]	731311965 1xAcetyl [N-Term]	731311965 1xAcetyl [N-Term]	PREDICTED: uncharacterized protein LOC104888641 [Beta vulgaris subsp. vulgaris]	731311965	1	2327.95	18				75.8		87.5	262.3	222.9	165.6	185.9				362888		244210	1.62488e+06	1.51441e+06	1.31663e+06	2.52899e+06				1.03109e+06			1.19061e+06
FALSE		High	Unambiguous	MESLINEEFGEVKAK	[-].MESLINEEFGEVKAK.[N]	1xAcetyl [N-Term]	1xAcetyl [N-Term]	6.98058e-06	5.15092e-05	1.584	1	1	4	731314726	731314726 [1-15]	731314726 1xAcetyl [N-Term]	731314726 1xAcetyl [N-Term]	PREDICTED: calcium-transporting ATPase 1, chloroplastic [Beta vulgaris subsp. vulgaris]	731314726	1	1765.87	15			17.6	82		86	278.5	87.1	283.8	165			146051	876986		535988	3.8526e+06	1.3216e+06	5.03891e+06	5.01324e+06			534464	2.49183e+06			2.61312e+06
FALSE		High	Unambiguous	MESIQQIR	[-].MESIQQIR.[D]	1xAcetyl [N-Term]	1xAcetyl [N-Term]	6.14033e-05	5.15092e-05	1.297	2	2	11	731320060; 731320062	731320060 [1-8]; 731320062 [1-8]	731320060 1xAcetyl [N-Term]; 731320062 1xAcetyl [N-Term]	731320060 1xAcetyl [N-Term]; 731320062 1xAcetyl [N-Term]	PREDICTED: chalcone synthase 2-like [Beta vulgaris subsp. vulgaris] PREDICTED: chalcone synthase 2-like [Beta vulgaris subsp. vulgaris]	731320060; 731320062	0	1046.53	8	9.8		47.4	577.9	8	70.4	22.5	32.2	34.3	197.5	1.68889e+06		4.82735e+06	7.57683e+07	1.82808e+06	5.38114e+06	3.81634e+06	5.9898e+06	7.46074e+06	7.35746e+07	3.64543e+06		1.76654e+07	2.15284e+08	2.9974e+06		2.62348e+07
FALSE		High	Unambiguous	MFCIAFTK	[R].MFCIAFTK.[R]	1xCarbamidomethyl [C3]	1xCarbamidomethyl [C3]	0.00206048	5.15092e-05	0.833	1	1	9	731328493	731328493 [137-144]			PREDICTED: 40S ribosomal protein S3a [Beta vulgaris subsp. vulgaris]	731328493	0	1017.49	8	182.7	227.8	7.2	99.3	78.9	197.2	35.4	50.5	68.7	52.5	5.6645e+06	5.809e+06	131856	2.33772e+06	3.21835e+06	2.70626e+06	1.0781e+06	1.68732e+06	2.68673e+06	3.51122e+06	1.22267e+07	1.52441e+07	482517	6.6423e+06	5.27694e+06		1.31939e+07
FALSE		High	Unambiguous	MFAGAGGALGHPPPDSPTLDTSEQVYISSLALLK	[R].MFAGAGGALGHPPPDSPTLDTSEQVYISSLALLK.[M]			3.58171e-07	5.15092e-05	1.976	1	1	5	731367021	731367021 [7-40]			PREDICTED: 26S proteasome non-ATPase regulatory subunit 14 homolog [Beta vulgaris subsp. vulgaris]	731367021	0	3440.74	34			26.1				312.8	211.1	233.2	216.8			109875				2.19159e+06	1622292	2097193	3.33689e+06			402081
FALSE		High	Unambiguous	MEWSTIQHLDLR	[-].MEWSTIQHLDLR.[H]	1xAcetyl [N-Term]	1xAcetyl [N-Term]	6.28148e-05	5.15092e-05	1.294	1	1	4	731363294	731363294 [1-12]	731363294 1xAcetyl [N-Term]	731363294 1xAcetyl [N-Term]	PREDICTED: uncharacterized protein LOC104906319 [Beta vulgaris subsp. vulgaris]	731363294	0	1570.77	12	124.1		19	34.2	303		154.2	229.9	106	29.7	1.17103e+06		105655	245068	3764210		1.43055e+06	2.33883e+06	1.26182e+06	604112	2.52763e+06		386638	696324	6.17196e+06
FALSE		High	Unambiguous	MEVTNVNEYEAIAK	[-].MEVTNVNEYEAIAK.[Q]	1xAcetyl [N-Term]	1xAcetyl [N-Term]	1.00304e-07	5.15092e-05	2.144	1	1	7	731365529	731365529 [1-14]	731365529 1xAcetyl [N-Term]	731365529 1xAcetyl [N-Term]	PREDICTED: peroxisomal (S)-2-hydroxy-acid oxidase isoform X1 [Beta vulgaris subsp. vulgaris]	731365529	0	1652.78	14	42		36.1	31.4		40	206.1	279.1	202.2	163.1	362406		184086	205930		152767	1.74948e+06	2.5981e+06	2.20274e+06	3.04068e+06	782244		673650	585120			744788
FALSE		High	Unambiguous	MEVGFLGLGIMGK	[-].MEVGFLGLGIMGK.[A]	1xAcetyl [N-Term]	1xAcetyl [N-Term]	4.26101e-08	5.15092e-05	2.257	1	1	3	731336040	731336040 [1-13]	731336040 1xAcetyl [N-Term]	731336040 1xAcetyl [N-Term]	PREDICTED: glyoxylate/succinic semialdehyde reductase 1 [Beta vulgaris subsp. vulgaris]	731336040	0	1393.72	13	127.5	25.3	32.6	99.4	164.1	48.3	74.4	243.7	92.4	92.3	2424037	395926	366049	1.43567e+06	4.10891e+06	406242	1.39065e+06	4.99379e+06	2.21618e+06	3.79052e+06	5.23223e+06	1.03899e+06	1.33953e+06	4.07923e+06	6.73714e+06		1.98056e+06
FALSE		High	Unambiguous	MEVELIHPVACEEGMR	[K].MEVELIHPVACEEGMR.[F]	1xCarbamidomethyl [C11]	1xCarbamidomethyl [C11]	0.000111714	5.15092e-05	1.218	1	1	3	1108926884	1108926884 [505-520]			PREDICTED: elongation factor Tu, chloroplastic [Beta vulgaris subsp. vulgaris]	1108926884	0	1899.88	16	17.9					90.3			241.8	650	65413.3					145884			1.11328e+06	5.12101e+06	141193						711233
FALSE		High	Unambiguous	MEVEIDEKELK	[-].MEVEIDEKELK.[A]	1xAcetyl [N-Term]	1xAcetyl [N-Term]	0.000392805	5.15092e-05	1.052	1	1	1	731360120	731360120 [1-11]	731360120 1xAcetyl [N-Term]	731360120 1xAcetyl [N-Term]	PREDICTED: TIP41-like protein [Beta vulgaris subsp. vulgaris]	731360120	1	1404.69	11			161.5	116.8	15.7	29.3	271.2	341	29.3	35.2			450638	419781	97915.3	61316.2	1.26041e+06	1737868	174592	359320			1.64908e+06	1.19275e+06	160546		298937
FALSE		High	Unambiguous	MESLQQLEALCER	[-].MESLQQLEALCER.[L]	1xAcetyl [N-Term]; 1xCarbamidomethyl [C11]	1xAcetyl [N-Term]; 1xCarbamidomethyl [C11]	0.000698397	5.15092e-05	0.976	1	2	1	731365678	731365678 [1-13]	731365678 1xAcetyl [N-Term]	731365678 1xAcetyl [N-Term]	PREDICTED: exportin-7 isoform X1 [Beta vulgaris subsp. vulgaris]	731365680; 731365678	0	1648.77	13
FALSE		High	Unambiguous	MEVATDELYTPIKQDTK	[K].MEVATDELYTPIKQDTK.[K]			6.76428e-08	5.15092e-05	2.196	1	1	5	731313610	731313610 [118-134]			PREDICTED: soluble inorganic pyrophosphatase 6, chloroplastic [Beta vulgaris subsp. vulgaris]	731313610	1	1981.98	17	83.6	65.3	12.7	153.3	72.6	39.1	174.5	130.6	165.3	103.2	1.75312e+06	1.12641e+06	156996	2.44323e+06	2.0046e+06	363434	3.59702e+06	2.95319e+06	4.37304e+06	4.67429e+06	3.78408e+06	2.95594e+06	574516	6.94207e+06	3.28682e+06		1.77186e+06
FALSE		High	Unambiguous	METFLFTSESVNEGHPDKLCDQVSDAVLDACLAQDPESK	[-].METFLFTSESVNEGHPDKLCDQVSDAVLDACLAQDPESK.[V]	1xAcetyl [N-Term]; 2xCarbamidomethyl [C20; C31]	1xAcetyl [N-Term]; 2xCarbamidomethyl [C20; C31]	5.19178e-07	5.15092e-05	1.927	1	1	13	731336846	731336846 [1-39]	731336846 1xAcetyl [N-Term]	731336846 1xAcetyl [N-Term]	PREDICTED: S-adenosylmethionine synthase 2 [Beta vulgaris subsp. vulgaris]	731336846	1	4424.98	39	198	8.3		74.3	61.5	89	93.1	171.6	132.4	171.8	1.15178e+07	395458		3.28547e+06	4.71212e+06	2.29172e+06	5.32048e+06	1.07595e+07	9.71438e+06	2.15722e+07	2.48609e+07	1.03777e+06		9.33518e+06	7.72619e+06		1.11729e+07
FALSE		High	Unambiguous	QDDALSDLSDLLGELK	[K].QDDALSDLSDLLGELK.[V]	2xGG [S6; S9]	2xGG [S6; S9]	0.126196	0.0037498	0.272	1	2	1	1108924838	1108924838 [253-268]			PREDICTED: SNAP25 homologous protein SNAP33 isoform X1 [Beta vulgaris subsp. vulgaris]	731334828; 1108924838	0	1959.95	16
FALSE		High	Unambiguous	MESSTALYTQLKEAQPFFVMAGPNVIESEEHIMK	[-].MESSTALYTQLKEAQPFFVMAGPNVIESEEHIMK.[M]	1xAcetyl [N-Term]	1xAcetyl [N-Term]	3.58381e-06	5.15092e-05	1.672	1	1	4	731317255	731317255 [1-34]	731317255 1xAcetyl [N-Term]	731317255 1xAcetyl [N-Term]	PREDICTED: 2-dehydro-3-deoxyphosphooctonate aldolase 1 [Beta vulgaris subsp. vulgaris]	731317255	1	3897.87	34								517.6		482.4								851992		1590246
FALSE		High	Unambiguous	MESSTALYTQLK	[-].MESSTALYTQLK.[E]	1xAcetyl [N-Term]	1xAcetyl [N-Term]	3.24766e-06	5.15092e-05	1.685	1	1	6	731317255	731317255 [1-12]	731317255 1xAcetyl [N-Term]	731317255 1xAcetyl [N-Term]	PREDICTED: 2-dehydro-3-deoxyphosphooctonate aldolase 1 [Beta vulgaris subsp. vulgaris]	731317255	0	1413.69	12			112.1	231.4		63.4	132.2	260.9	200.1				682226	1.81349e+06		289411	1.34032e+06	2.90081e+06	2.60346e+06				2.49657e+06	5.15277e+06			1.41098e+06
FALSE		High	Unambiguous	MESSLASASAIGDQR	[-].MESSLASASAIGDQR.[Q]	1xAcetyl [N-Term]	1xAcetyl [N-Term]	4.10503e-07	5.15092e-05	1.958	1	1	3	731350190	731350190 [1-15]	731350190 1xAcetyl [N-Term]	731350190 1xAcetyl [N-Term]	PREDICTED: COP9 signalosome complex subunit 4 [Beta vulgaris subsp. vulgaris]	731350190	0	1564.73	15	9.8		187.2	157.5	92.5	10.2	110	150.2	152.9	129.8	59709.5		674647	730899	743718	27677.1	660234	988936	1.17781e+06	1.71099e+06	128882		2.46883e+06	2.07674e+06	1.21943e+06		134935
FALSE		High	Unambiguous	MESSKNEVTPTLFSPYKLGK	[-].MESSKNEVTPTLFSPYKLGK.[F]	1xAcetyl [N-Term]	1xAcetyl [N-Term]	0.000217575	5.15092e-05	1.13	1	1	2	731372169	731372169 [1-20]	731372169 1xAcetyl [N-Term]	731372169 1xAcetyl [N-Term]	PREDICTED: 12-oxophytodienoate reductase 3 [Beta vulgaris subsp. vulgaris]	731372169	2	2298.17	20							179.1	176.5	185.4	459.1							1.97555e+06	2.13526e+06	2.62507e+06	11125646
FALSE		High	Unambiguous	MESQVEGNR	[-].MESQVEGNR.[S]	1xAcetyl [N-Term]	1xAcetyl [N-Term]	0.00166737	5.15092e-05	0.861	1	1	3	731351242	731351242 [1-9]	731351242 1xAcetyl [N-Term]	731351242 1xAcetyl [N-Term]	PREDICTED: thioredoxin-like protein CXXS1 [Beta vulgaris subsp. vulgaris]	731351242	0	1091.48	9	52.5	13	273.8	146.5	126.3	32.9		160		195	283107	57741	871655	600615	896936	78659.4		930373		2271848	611080	151525	3.18977e+06	1.70656e+06	1.47065e+06		383491
FALSE		High	Unambiguous	METTEMEVEEQQSHSTPTSLKR	[-].METTEMEVEEQQSHSTPTSLKR.[F]	1xAcetyl [N-Term]	1xAcetyl [N-Term]	0.000667382	5.15092e-05	0.982	1	1	1	731346546	731346546 [1-22]	731346546 1xAcetyl [N-Term]	731346546 1xAcetyl [N-Term]	PREDICTED: WD repeat-containing protein 89 homolog [Beta vulgaris subsp. vulgaris]	731346546	1	2620.19	22							166.2	571.2	262.6								182037	686252	369175
FALSE		High	Unambiguous	MENQGNLEAQIEALLNVEKQMR	[-].MENQGNLEAQIEALLNVEKQMR.[L]	1xAcetyl [N-Term]	1xAcetyl [N-Term]	4.32353e-09	5.15092e-05	2.559	1	1	4	731355787	731355787 [1-22]	731355787 1xAcetyl [N-Term]	731355787 1xAcetyl [N-Term]	PREDICTED: 26S proteasome non-ATPase regulatory subunit 12 homolog A [Beta vulgaris subsp. vulgaris]	731355787	1	2600.28	22	218.4			27.8		232.1	374.2			147.5	1.07843e+06			104321		507313	1.81566e+06			1.57148e+06	2.32776e+06			296412			2.47332e+06
FALSE		High	Unambiguous	MENQGNLEAQIEALLNVEK	[-].MENQGNLEAQIEALLNVEK.[Q]	1xAcetyl [N-Term]	1xAcetyl [N-Term]	3.24005e-10	5.15092e-05	2.901	1	1	13	731355787	731355787 [1-19]	731355787 1xAcetyl [N-Term]	731355787 1xAcetyl [N-Term]	PREDICTED: 26S proteasome non-ATPase regulatory subunit 12 homolog A [Beta vulgaris subsp. vulgaris]	731355787	0	2185.08	19	177.5	95.6	105	105.8	66.8	150.3	40.1	106.9	98.4	53.6	7.8487e+06	3.47814e+06	2.73732e+06	3.55238e+06	3.88732e+06	2.94195e+06	1.74166e+06	5.09524e+06	5.4848e+06	5.11828e+06	1.69412e+07	9.12739e+06	1.0017e+07	1.00936e+07	6.37381e+06		1.4343e+07
FALSE		High	Unambiguous	MENLISLVNKIQR	[-].MENLISLVNKIQR.[A]	1xAcetyl [N-Term]	1xAcetyl [N-Term]	6.21976e-09	5.15092e-05	2.511	1	1	11	731311287	731311287 [1-13]	731311287 1xAcetyl [N-Term]	731311287 1xAcetyl [N-Term]	PREDICTED: dynamin-related protein 5A [Beta vulgaris subsp. vulgaris]	731311287	1	1599.89	13		6.8		3.5	8.5	145.9	254.5	193.3	115.8	271.8		161211		76927.7	322468	1.8656e+06	7.22288e+06	6.01765e+06	4.21764e+06	16948348		423053		218579	528733		9.09542e+06
FALSE		High	Unambiguous	CLSIAIGMLATSIGAR	[K].CLSIAIGMLATSIGAR.[A]	1xCarbamidomethyl [C1]; 1xOxidation [M8]; 3xGG [S3; T11; S12]	1xCarbamidomethyl [C1]; 1xOxidation [M8]; 3xGG [S3; T11; S12]	0.12788	0.0037884	0.27	1	1	1	1108962944	1108962944 [218-233]			PREDICTED: cysteine-rich receptor-like protein kinase 25 [Beta vulgaris subsp. vulgaris]	1108962944	0	1992	16
FALSE		High	Unambiguous	MEGKDEDVRLGANK	[-].MEGKDEDVRLGANK.[F]	1xAcetyl [N-Term]	1xAcetyl [N-Term]	1.6918e-07	5.15092e-05	2.075	1	1	7	733215449	733215449 [1-14]	733215449 1xAcetyl [N-Term]	733215449 1xAcetyl [N-Term]	probable aquaporin PIP1-4 [Beta vulgaris subsp. vulgaris]	733215449	2	1603.77	14			5.6	3		147	247.1	170.3	182.2	244.8			109829	74786.6		2.16088e+06	8060446	6.09269e+06	7.62957e+06	1.75376e+07			401913	212495			1.0535e+07
FALSE		High	Unambiguous	SLLSYISGSQK	[K].SLLSYISGSQK.[S]	2xGG [S1; K11]	2xGG [S1; K11]	0.168974	0.00570726	0.227	1	1	2	731330234	731330234 [168-178]			PREDICTED: uncharacterized protein LOC104891929 [Beta vulgaris subsp. vulgaris]	731330234	0	1410.72	11
FALSE		High	Unambiguous	MEGKDEDVR	[-].MEGKDEDVR.[L]	1xAcetyl [N-Term]	1xAcetyl [N-Term]	5.35758e-05	5.15092e-05	1.315	1	1	21	733215449	733215449 [1-9]	733215449 1xAcetyl [N-Term]	733215449 1xAcetyl [N-Term]	probable aquaporin PIP1-4 [Beta vulgaris subsp. vulgaris]	733215449	1	1120.49	9	110.6	39.4	322.9	178	77.4	90.6	45.2	47.7	56.1	32.1	2.26644e+07	6.63517e+06	39026899	2.77058e+07	2.0886e+07	8.21596e+06	9.10535e+06	1.05352e+07	1.45056e+07	1.41773e+07	4.89207e+07	1.74121e+07	1.42817e+08	7.8722e+07	3.42456e+07		4.00555e+07
FALSE		High	Unambiguous	MEGGDEGIERMVDSKDMQQQSK	[-].MEGGDEGIERMVDSKDMQQQSK.[A]	1xAcetyl [N-Term]	1xAcetyl [N-Term]	4.67203e-06	5.15092e-05	1.637	1	1	2	731322154	731322154 [1-22]	731322154 1xAcetyl [N-Term]	731322154 1xAcetyl [N-Term]	PREDICTED: huntingtin-interacting protein K [Beta vulgaris subsp. vulgaris]	731322154	2	2540.11	22			19.1			59.9	191.5	391.4	79.8	258.3			73682.9			173679	1.23127e+06	2.76e+06	658662	3.6488e+06			269638				846743
FALSE		High	Unambiguous	MEGGDEGIER	[-].MEGGDEGIER.[M]	1xAcetyl [N-Term]	1xAcetyl [N-Term]	0.000143441	5.15092e-05	1.185	1	1	4	731322154	731322154 [1-10]	731322154 1xAcetyl [N-Term]	731322154 1xAcetyl [N-Term]	PREDICTED: huntingtin-interacting protein K [Beta vulgaris subsp. vulgaris]	731322154	0	1134.47	10	43.2		140.6	80.4	90.3	20.2	99.4	149.4	170.1	206.4	386085		741858	546097	1.0634e+06	79815.5	873517	1.43987e+06	1.91805e+06	3984703	833356		2.71478e+06	1.55165e+06	1.7436e+06		389127
FALSE		High	Unambiguous	MEGGAEQTSSYTYWVR	[-].MEGGAEQTSSYTYWVR.[E]	1xAcetyl [N-Term]	1xAcetyl [N-Term]	6.47125e-06	5.15092e-05	1.594	1	1	1	731318291	731318291 [1-16]	731318291 1xAcetyl [N-Term]	731318291 1xAcetyl [N-Term]	PREDICTED: uncharacterized protein LOC104886816 [Beta vulgaris subsp. vulgaris]	731318291	0	1906.83	16	65.8		127.4					410.8		396	53382.1		60948.8					359181		693336	115224		223039
FALSE		High	Unambiguous	KQALESSTGSPTALSPSRVLSK	[K].KQALESSTGSPTALSPSRVLSK.[D]	2xPhospho [K/S/T]; 1xGG [K/S/T]	2xPhospho [K1; T8; S21; K22]; 1xGG [K1; S6; S7; T8]	0.167907	0.00570726	0.228	1	1	6	731320933	731320933 [287-308]	731320933 2xPhospho [K287; T294; S307; K308]	731320933 2xPhospho [T/S/K]	PREDICTED: uncharacterized protein LOC104887980 [Beta vulgaris subsp. vulgaris]	731320933	2	2518.19	22
FALSE		High	Unambiguous	MEFVSPEGLR	[-].MEFVSPEGLR.[L]	1xAcetyl [N-Term]	1xAcetyl [N-Term]	0.00045704	5.15092e-05	1.032	1	1	1	731311416	731311416 [1-10]	731311416 1xAcetyl [N-Term]	731311416 1xAcetyl [N-Term]	PREDICTED: exosome complex component RRP41 homolog [Beta vulgaris subsp. vulgaris]	731311416	0	1206.58	10	66		131.3	159.5				57.3	43.7	542.3	60512.3		71027.8	111109				56635	50573	1.07364e+06	130614		259922	315700
FALSE		High	Unambiguous	MEFSPRAAELTNLLESR	[-].MEFSPRAAELTNLLESR.[I]			2.32701e-06	5.15092e-05	1.729	1	1	1	162279935	162279935 [1-17]			atp1 gene product (mitochondrion) [Beta vulgaris subsp. vulgaris]	162279935	1	1963.99	17						20.5		979.5								19434.9		2.26591e+06									94751.5
FALSE		High	Unambiguous	MEEQGGER	[-].MEEQGGER.[M]	1xAcetyl [N-Term]	1xAcetyl [N-Term]	0.000281483	5.15092e-05	1.096	1	1	2	731357795	731357795 [1-8]	731357795 1xAcetyl [N-Term]	731357795 1xAcetyl [N-Term]	PREDICTED: glycine-rich protein 2 [Beta vulgaris subsp. vulgaris]	731357795	0	977.399	8	249.9	70.3		648.4			8.8	22.6			281328	65039.5		554404			9691.19	27461.5			607240	170678		1.57526e+06
FALSE		High	Unambiguous	MEELTSMDFSLLGDAIASK	[-].MEELTSMDFSLLGDAIASK.[S]	1xAcetyl [N-Term]	1xAcetyl [N-Term]	4.53257e-06	5.15092e-05	1.641	1	1	1	731318837	731318837 [1-19]	731318837 1xAcetyl [N-Term]	731318837 1xAcetyl [N-Term]	PREDICTED: COP9 signalosome complex subunit 8 [Beta vulgaris subsp. vulgaris]	731318837	0	2099.99	19
FALSE		High	Unambiguous	MEEFSTHTASQVEDGKLSEEKPR	[-].MEEFSTHTASQVEDGKLSEEKPR.[F]	1xAcetyl [N-Term]	1xAcetyl [N-Term]	2.37352e-11	5.15092e-05	3.246	1	1	3	1108898512	1108898512 [1-23]	1108898512 1xAcetyl [N-Term]	1108898512 1xAcetyl [N-Term]	PREDICTED: probable UMP-CMP kinase 2 isoform X2 [Beta vulgaris subsp. vulgaris]	1108898512	1	2677.24	23				52.7		60.2	115.2	222.1	110.1	439.6				458669		305744	1.29743e+06	2744579	1.59233e+06	1.08787e+07				1.30324e+06			1.4906e+06
FALSE		High	Unambiguous	MEEENPKSMEEETPKSEHPPTSTSDLMASAK	[-].MEEENPKSMEEETPKSEHPPTSTSDLMASAK.[I]	1xAcetyl [N-Term]	1xAcetyl [N-Term]	6.77221e-06	5.15092e-05	1.588	1	1	4	731339253	731339253 [1-31]	731339253 1xAcetyl [N-Term]	731339253 1xAcetyl [N-Term]	PREDICTED: nodulin-related protein 1-like [Beta vulgaris subsp. vulgaris]	731339253	2	3489.53	31							249	205.1	144.8	401.1							1.17599e+06	1062444	878139	4161638
FALSE		High	Unambiguous	MEEELLLKLEEK	[-].MEEELLLKLEEK.[R]	1xAcetyl [N-Term]	1xAcetyl [N-Term]	3.2495e-05	5.15092e-05	1.381	1	1	1	731328336	731328336 [1-12]	731328336 1xAcetyl [N-Term]	731328336 1xAcetyl [N-Term]	PREDICTED: sugar transporter ERD6-like 5 [Beta vulgaris subsp. vulgaris]	731328336	1	1545.81	12					642.1	118.1	219.3	20.5							3.81351e+06	235825	972365	99470.7							6.2528e+06		1.14972e+06
FALSE		High	Unambiguous	MEEEFIENMCAQILK	[R].MEEEFIENMCAQILK.[F]	1xCarbamidomethyl [C10]	1xCarbamidomethyl [C10]	0.000375356	5.15092e-05	1.058	1	1	1	731327054	731327054 [270-284]			PREDICTED: T-complex protein 1 subunit gamma [Beta vulgaris subsp. vulgaris]	731327054	0	1884.85	15	124.5				149.3		601.9		124.2		592162				934617		2.81221e+06		744826		1.27817e+06				1.53244e+06
FALSE		High	Unambiguous	MEFTEENLNLLHK	[-].MEFTEENLNLLHK.[I]	1xAcetyl [N-Term]	1xAcetyl [N-Term]	3.29911e-05	5.15092e-05	1.379	1	1	2	731359522	731359522 [1-13]	731359522 1xAcetyl [N-Term]	731359522 1xAcetyl [N-Term]	PREDICTED: uncharacterized protein LOC104904680 [Beta vulgaris subsp. vulgaris]	731359522	0	1659.8	13		73.3		37.5		99.4	201	243.2	161.8	183.8		329188		155636		240534	1078910	1.43205e+06	1.11501e+06	2.16808e+06		863861		442216			1.17268e+06
FALSE		High	Unambiguous	MEGLIPYLVR	[-].MEGLIPYLVR.[A]	1xAcetyl [N-Term]	1xAcetyl [N-Term]	0.000129008	5.15092e-05	1.199	1	1	5	731352067	731352067 [1-10]	731352067 1xAcetyl [N-Term]	731352067 1xAcetyl [N-Term]	PREDICTED: uncharacterized protein LOC104901457 [Beta vulgaris subsp. vulgaris]	731352067	0	1232.67	10			53.8	102	21.4	227.4	137.2	199.8	105.2	153.1			373567	912301	331721	1.18504e+06	1.58673e+06	2.53369e+06	1.5619e+06	3.88884e+06			1.36705e+06	2.59217e+06	543903		5.77746e+06
FALSE		High	Unambiguous	MEGSQYYR	[R].MEGSQYYR.[Y]			0.00166737	5.15092e-05	0.861	1	1	2	731368733	731368733 [200-207]			PREDICTED: alpha carbonic anhydrase 7 [Beta vulgaris subsp. vulgaris]	731368733	0	1033.44	8	1.3	2.2	13.6			201.5	158.9	289.5	196.2	136.8	25248.4	35941.6	156510			1.74151e+06	3048050	6.09126e+06	4.83172e+06	5.76425e+06	54498.1	94318.4	572738				8.49046e+06
FALSE		High	Unambiguous	MEGVESYDINLEEK	[K].MEGVESYDINLEEK.[K]			9.38021e-06	5.15092e-05	1.545	1	1	2	731365775	731365775 [27-40]			PREDICTED: copper transport protein ATX1 [Beta vulgaris subsp. vulgaris]	731365775	0	1655.75	14	61.4		285.5	74.5	251.1		57.8			269.8	134543		369075	124118	724430		124424			1.27636e+06	290409		1.35061e+06	352663	1.18781e+06
FALSE		High	Unambiguous	MENLISLVNK	[-].MENLISLVNK.[I]	1xAcetyl [N-Term]	1xAcetyl [N-Term]	1.05091e-05	5.15092e-05	1.53	1	1	9	731311287	731311287 [1-10]	731311287 1xAcetyl [N-Term]	731311287 1xAcetyl [N-Term]	PREDICTED: dynamin-related protein 5A [Beta vulgaris subsp. vulgaris]	731311287	0	1202.64	10	14.3		113.2	48.5	242.7	97.8	86.5	147.9	125.2	123.9	371444		1.73718e+06	957607	8.31231e+06	1.12665e+06	2.21019e+06	4.14553e+06	4.10794e+06	6.95743e+06	801753		6.35711e+06	2.7209e+06	1.36292e+07		5.49277e+06
FALSE		High	Unambiguous	MEMHVGAVETGER	[K].MEMHVGAVETGER.[A]			9.59585e-06	5.15092e-05	1.542	1	1	1	731314744	731314744 [189-201]			PREDICTED: adenine phosphoribosyltransferase 1-like [Beta vulgaris subsp. vulgaris]	731314744	0	1445.65	13				1000										822468										2.33692e+06
FALSE		High	Unambiguous	MELVDAAFPLLK	[K].MELVDAAFPLLK.[G]	1xOxidation [M1]	1xOxidation [M1]	3.52991e-06	5.15092e-05	1.674	1	1	19	733215721	733215721 [56-67]			malate dehydrogenase, cytoplasmic [Beta vulgaris subsp. vulgaris]	733215721	0	1362.73	12	60.9	23.1	15.3	235.1	1	292.6	109.4	137.4	58.9	66.2	1.98967e+06	620679	295046	5.83149e+06	42128.8	4.2287e+06	3.50989e+06	4.83392e+06	2.42544e+06	4.66527e+06	4.29466e+06	1.6288e+06	1.0797e+06	1.65693e+07	69076.2		2.06163e+07
FALSE		High	Unambiguous	MELVDAAFPLLK	[K].MELVDAAFPLLK.[G]			5.19178e-07	5.15092e-05	1.927	1	1	83	733215721	733215721 [56-67]			malate dehydrogenase, cytoplasmic [Beta vulgaris subsp. vulgaris]	733215721	0	1346.74	12	134.5	135.5	73.5	146.5	190.2	48.6	43.5	87	57.9	82.7	8.63154e+07	7.1527e+07	2.78098e+07	7.1425e+07	1.60654e+08	1.38215e+07	2.74583e+07	6.01887e+07	4.68933e+07	1.1461e+08	1.8631e+08	1.87702e+08	1.01768e+08	2.02944e+08	2.63415e+08		6.73844e+07
FALSE		High	Unambiguous	MELTLTRPDDWHLHLR	[-].MELTLTRPDDWHLHLR.[D]	1xAcetyl [N-Term]	1xAcetyl [N-Term]	4.33114e-06	5.15092e-05	1.647	1	1	1	731325160	731325160 [1-16]	731325160 1xAcetyl [N-Term]	731325160 1xAcetyl [N-Term]	PREDICTED: dihydroorotase, mitochondrial isoform X2 [Beta vulgaris subsp. vulgaris]	731325160	0	2075.05	16	857.5	40.6	75	19.9						7	2.45699e+06	95747	126845	43263.9						43266.5	5.30335e+06	251261	464183	122928
FALSE		High	Unambiguous	MELPQWTDIVK	[K].MELPQWTDIVK.[T]			0.000552292	5.15092e-05	1.007	1	1	2	731334810	731334810 [29-39]			PREDICTED: 40S ribosomal protein S19-1 [Beta vulgaris subsp. vulgaris]	731334810	0	1359.7	11	12.4	16.1	320.7	32.5	9.4	102.3		272		234.6	61464.3	65848.3	940226	122871	61552.6	225061		1.4574e+06		2.5175e+06	132669	172800	3.4407e+06	349121	100924		1.09725e+06
FALSE		High	Unambiguous	MEIFSLLTHFR	[-].MEIFSLLTHFR.[T]			5.39537e-06	5.15092e-05	1.618	1	1	4	731343090	731343090 [1-11]			PREDICTED: sphingosine-1-phosphate lyase [Beta vulgaris subsp. vulgaris]	731343090	0	1393.73	11	141.8	127.1	156.4	120.5	223.2	231					1.67936e+06	1.2383e+06	1.09245e+06	1.08385e+06	3.47933e+06	1.21097e+06					3.62485e+06	3.24956e+06	3.99775e+06	3.0796e+06	5.70486e+06		5.90389e+06
FALSE		High	Unambiguous	MELEPFTFGPYKIDSK	[-].MELEPFTFGPYKIDSK.[E]	1xAcetyl [N-Term]	1xAcetyl [N-Term]	0.000460514	5.15092e-05	1.031	1	1	4	731354898	731354898 [1-16]	731354898 1xAcetyl [N-Term]	731354898 1xAcetyl [N-Term]	PREDICTED: bifunctional bis(5'-adenosyl)-triphosphatase/adenylylsulfatase FHIT isoform X3 [Beta vulgaris subsp. vulgaris]	731354898	1	1943.95	16			27.6			112.6	177.4	386.4	104.6	191.4			102203			312510	1.09283e+06	2.61006e+06	827125	2.58897e+06			374006				1.52359e+06
FALSE		High	Unambiguous	MELEPFTFGPYK	[-].MELEPFTFGPYK.[I]	1xAcetyl [N-Term]	1xAcetyl [N-Term]	0.000604824	5.15092e-05	0.995	1	1	2	731354898	731354898 [1-12]	731354898 1xAcetyl [N-Term]	731354898 1xAcetyl [N-Term]	PREDICTED: bifunctional bis(5'-adenosyl)-triphosphatase/adenylylsulfatase FHIT isoform X3 [Beta vulgaris subsp. vulgaris]	731354898	0	1500.71	12	146.1		243.1	140.3	75.3		75.2	120.9	199		309664		303947	225884	210083		156692	276193	531856		668402		1.11228e+06	641815	344461
FALSE		High	Unambiguous	MELDSFLKECALNY	[K].MELDSFLKECALNY.[-]	1xCarbamidomethyl [C10]	1xCarbamidomethyl [C10]	3.47879e-05	5.15092e-05	1.372	1	1	8	162279935	162279935 [493-506]			atp1 gene product (mitochondrion) [Beta vulgaris subsp. vulgaris]	162279935	1	1732.79	14			4.7	11.2	199.2	89.6	214.1	166	101.9	213.3			91130.3	277710	8592302	1.30036e+06	6.89649e+06	5.86479e+06	4212042	15085043			333486	789072	1.40883e+07		6.33968e+06
FALSE		High	Unambiguous	MEIDLSPK	[-].MEIDLSPK.[L]	1xAcetyl [N-Term]	1xAcetyl [N-Term]	0.000682713	5.15092e-05	0.979	1	2	1	731349135	731349135 [1-8]	731349135 1xAcetyl [N-Term]	731349135 1xAcetyl [N-Term]	PREDICTED: glutelin type-B 5 [Beta vulgaris subsp. vulgaris]	731349137; 731349135	0	974.486	8			198.2		60.6		171		570.1				91778.9		62659.9		131913		564347				335859		102740
FALSE		High	Unambiguous	MEIASDSLYKAK	[R].MEIASDSLYKAK.[L]			0.000698397	5.15092e-05	0.976	1	1	1	731344295	731344295 [78-89]			PREDICTED: pyruvate dehydrogenase E1 component subunit alpha, mitochondrial [Beta vulgaris subsp. vulgaris]	731344295	1	1355.69	12	114.5		83.4							802.1	127970		55006.5							1935716	276221		201293
FALSE		High	Unambiguous	MEIASDSLYK	[R].MEIASDSLYK.[A]			1.956e-05	5.15092e-05	1.448	1	1	9	731344295	731344295 [78-87]			PREDICTED: pyruvate dehydrogenase E1 component subunit alpha, mitochondrial [Beta vulgaris subsp. vulgaris]	731344295	0	1156.56	10	10.5	6.2	97.9	164.4	9.9	90.6	84.3	214.3	135.5	186.3	315481	153764	1.72729e+06	3.73613e+06	389785	1.20074e+06	2.47799e+06	6.90947e+06	5.11403e+06	12033761	680959	403510	6.32091e+06	1.06157e+07	639108		5.85399e+06
FALSE		High	Unambiguous	MEKENSGMDISIGEK	[-].MEKENSGMDISIGEK.[V]	1xAcetyl [N-Term]	1xAcetyl [N-Term]	5.99559e-07	5.15092e-05	1.908	1	1	2	731364732	731364732 [1-15]	731364732 1xAcetyl [N-Term]	731364732 1xAcetyl [N-Term]	PREDICTED: methionine aminopeptidase 2B-like [Beta vulgaris subsp. vulgaris]	731364732	1	1709.77	15			125.1	139.5	13.9	78.5	51.2	240.6	153.3	198.1			317688	456332	78603.8	149617	216498	1.1166e+06	832522	1.84099e+06			1.16256e+06	1.2966e+06	128882		729433
FALSE		High	Unambiguous	MEHTSVADIVDDKSTVGGGVR	[-].MEHTSVADIVDDKSTVGGGVR.[D]	1xAcetyl [N-Term]	1xAcetyl [N-Term]	1.82389e-08	5.15092e-05	2.369	1	1	6	731353916	731353916 [1-21]	731353916 1xAcetyl [N-Term]	731353916 1xAcetyl [N-Term]	PREDICTED: NADP-dependent malic enzyme [Beta vulgaris subsp. vulgaris]	731353916	1	2215.07	21		191.9		233.4		90.5	88.7	72.4	227.3	95.8		1.03833e+06		1.16615e+06		263653	573377	513074	1.88539e+06	1.35971e+06		2.72479e+06		3.31345e+06			1.2854e+06
FALSE		High	Unambiguous	MEHGSYQNPSSSTFSITEEDHTLANSLR	[-].MEHGSYQNPSSSTFSITEEDHTLANSLR.[L]	1xAcetyl [N-Term]	1xAcetyl [N-Term]	2.68728e-06	5.15092e-05	1.71	1	1	1	1108957668	1108957668 [1-28]	1108957668 1xAcetyl [N-Term]	1108957668 1xAcetyl [N-Term]	PREDICTED: DNA-directed RNA polymerases I and III subunit RPAC2 [Beta vulgaris subsp. vulgaris]	1108957668	0	3180.42	28							191.5	536.2	272.4								333525	1.02439e+06	609010
FALSE		High	Unambiguous	MEGVLSQIGHQSSPSPSGTTDQSATELPSTSR	[R].MEGVLSQIGHQSSPSPSGTTDQSATELPSTSR.[G]			3.17647e-05	5.15092e-05	1.384	1	1	3	1108865121	1108865121 [254-285]			PREDICTED: large proline-rich protein BAG6 [Beta vulgaris subsp. vulgaris]	1108865121	0	3272.53	32							240.6	79	268.8	411.6							447302	161128	641526	1.68073e+06
FALSE		High	Unambiguous	MEDWEDDSVPQLLKKDQPR	[-].MEDWEDDSVPQLLKKDQPR.[S]	1xAcetyl [N-Term]	1xAcetyl [N-Term]	2.34333e-07	5.15092e-05	2.032	1	1	3	731338023	731338023 [1-19]	731338023 1xAcetyl [N-Term]	731338023 1xAcetyl [N-Term]	PREDICTED: eukaryotic translation initiation factor 3 subunit J [Beta vulgaris subsp. vulgaris]	731338023	2	2371.12	19						35.4	212	356.5	201.7	194.3						300985	3.99847e+06	7.37228e+06	4.88276e+06	8.04901e+06							1.4674e+06
FALSE		High	Unambiguous	MFDASLYEK	[R].MFDASLYEK.[T]			0.000662348	5.15092e-05	0.983	1	1	11	731354706	731354706 [511-519]			PREDICTED: delta(24)-sterol reductase [Beta vulgaris subsp. vulgaris]	731354706	0	1103.51	9	107.3	69.9	113	138.6	51.5	67.5	111.2	97.6	60.7	182.7	4.03673e+06	2.16444e+06	2.50825e+06	3.9617e+06	2.5513e+06	1.12395e+06	4.11223e+06	3.95695e+06	2.8786e+06	1.48371e+07	8.71319e+06	5.67994e+06	9.17881e+06	1.12566e+07	4.18322e+06		5.47964e+06
FALSE		High	Unambiguous	MDGHDSDDPKQNTTDMTVFVQNLLQQMQTR	[-].MDGHDSDDPKQNTTDMTVFVQNLLQQMQTR.[F]	1xAcetyl [N-Term]; 1xOxidation [M16]	1xAcetyl [N-Term]; 1xOxidation [M16]	0.00196912	5.15092e-05	0.839	1	1	4	731346539	731346539 [1-30]	731346539 1xAcetyl [N-Term]	731346539 1xAcetyl [N-Term]	PREDICTED: heat shock factor-binding protein 1 [Beta vulgaris subsp. vulgaris]	731346539	1	3551.58	30							670.6	304.5	24.9								3317396	1.65226e+06	158272
FALSE		High	Unambiguous	MDGEELTEQETALYDR	[-].MDGEELTEQETALYDR.[Q]	1xAcetyl [N-Term]	1xAcetyl [N-Term]	1.10556e-09	5.15092e-05	2.739	1	1	2	731317974	731317974 [1-16]	731317974 1xAcetyl [N-Term]	731317974 1xAcetyl [N-Term]	PREDICTED: SUMO-activating enzyme subunit 1B-1 [Beta vulgaris subsp. vulgaris]	731317974	0	1941.84	16	35.7		42.7	80.1		22.9	148.7	294.9	172.2	202.8	190843		134651	325345		54154	781454	1.69979e+06	1.16174e+06	2.34099e+06	411931		492749	924421			264019
FALSE		High	Unambiguous	MASILEPSKSTFFPAMTK	[R].MASILEPSKSTFFPAMTK.[I]			4.49309e-08	5.15092e-05	2.25	1	2	10	731345443	731345443 [14-31]			PREDICTED: pyruvate kinase 1, cytosolic isoform X2 [Beta vulgaris subsp. vulgaris]	731345443; 1108951830	1	1986.01	18			14.6	10.9		28.4	255.2	265.9	167.1	257.9			227998	219444		333152	6.63696e+06	7.58348e+06	5.57607e+06	1.47307e+07			834346	623517			1.62423e+06
FALSE		High	Unambiguous	MASILEPSK	[R].MASILEPSK.[S]			0.00045704	5.15092e-05	1.032	1	2	7	731345443	731345443 [14-22]			PREDICTED: pyruvate kinase 1, cytosolic isoform X2 [Beta vulgaris subsp. vulgaris]	731345443; 1108951830	0	975.518	9	89.3	39.5	207.7	91	22.2	120.7	34	105.8	168.4	121.4	1.61199e+06	586234	2.21152e+06	1.24773e+06	526724	964812	603153	2.0582e+06	3.83326e+06	4.72801e+06	3.47944e+06	1.5384e+06	8.09294e+06	3.54525e+06	863638		4.70378e+06
FALSE		High	Unambiguous	MASLFKDLNK	[-].MASLFKDLNK.[L]	1xMet-loss+Acetyl [N-Term]	1xMet-loss+Acetyl [N-Term]	0.000185578	5.15092e-05	1.151	1	2	2	731314786	731314786 [1-10]	731314786 1xMet-loss+Acetyl [N-Term]	731314786 1xMet-loss+Acetyl [N-Term]	PREDICTED: nuclear cap-binding protein subunit 2 [Beta vulgaris subsp. vulgaris]	731364591; 731314786	1	1077.59	10		54.1	22.9			178.8	5.7	102.3	76.7	559.5		142162	43133.6			252973	17833.1	352261	309233	3.85814e+06		373063	157845				1.23333e+06
FALSE		High	Unambiguous	MASLENLTREQYLYLAK	[-].MASLENLTREQYLYLAK.[L]	1xMet-loss+Acetyl [N-Term]	1xMet-loss+Acetyl [N-Term]	9.01568e-09	5.15092e-05	2.462	1	1	10	731339792	731339792 [1-17]	731339792 1xMet-loss+Acetyl [N-Term]	731339792 1xMet-loss+Acetyl [N-Term]	PREDICTED: 14-3-3-like protein GF14 kappa [Beta vulgaris subsp. vulgaris]	731339792	1	1954.03	17						76	264.7	231.8	170.9	256.6						1.98315e+06	1.53287e+07	1.47212e+07	1.26986e+07	32633156							9.66852e+06
FALSE		High	Unambiguous	MASLENLTR	[-].MASLENLTR.[E]	1xMet-loss+Acetyl [N-Term]	1xMet-loss+Acetyl [N-Term]	7.76578e-05	5.15092e-05	1.266	1	1	7	731339792	731339792 [1-9]	731339792 1xMet-loss+Acetyl [N-Term]	731339792 1xMet-loss+Acetyl [N-Term]	PREDICTED: 14-3-3-like protein GF14 kappa [Beta vulgaris subsp. vulgaris]	731339792	0	945.5	9	69.7	6.4	257.8	165.3	47.2	58.3	104.2	145.7	135.1	10.3	1.50221e+06	113133	3.27622e+06	2.70639e+06	1.33996e+06	556467	2.20612e+06	3.38308e+06	3.67025e+06	477617	3.24248e+06	296886	1.19891e+07	7.6898e+06	2.19705e+06		2.71296e+06
FALSE		High	Unambiguous	MASIDAQLR	[K].MASIDAQLR.[L]			0.000869845	5.15092e-05	0.947	1	1	8	731329055	731329055 [9-17]			PREDICTED: phosphoenolpyruvate carboxylase 2 [Beta vulgaris subsp. vulgaris]	731329055	0	1004.52	9	4.4		34.4	121.6	0.3	56.7	274.4	175.4	174.9	158	293583		1.36329e+06	6.19801e+06	28265.7	1.68339e+06	1.80997e+07	1.26835e+07	1.4801e+07	2.28885e+07	633692		4.98888e+06	1.76107e+07	46345.7		8.20706e+06
FALSE		High	Unambiguous	MASHLPATTDSLAMALEANSAAESISILQR	[-].MASHLPATTDSLAMALEANSAAESISILQR.[V]	1xMet-loss+Acetyl [N-Term]	1xMet-loss+Acetyl [N-Term]	3.61935e-15	5.15092e-05	4.406	1	1	4	731355173	731355173 [1-30]	731355173 1xMet-loss+Acetyl [N-Term]	731355173 1xMet-loss+Acetyl [N-Term]	PREDICTED: 26S proteasome non-ATPase regulatory subunit 11 homolog [Beta vulgaris subsp. vulgaris]	731355173	0	3010.51	30			50.6				235.4	349.2	82.8	282			320906				2.4899e+06	4.05008e+06	1.12358e+06	6551837			1.17434e+06
FALSE		High	Unambiguous	MASISALTAAAR	[-].MASISALTAAAR.[R]	1xMet-loss+Acetyl [N-Term]	1xMet-loss+Acetyl [N-Term]	1.7996e-05	5.15092e-05	1.459	1	1	2	731360204	731360204 [1-12]	731360204 1xMet-loss+Acetyl [N-Term]	731360204 1xMet-loss+Acetyl [N-Term]	PREDICTED: secoisolariciresinol dehydrogenase [Beta vulgaris subsp. vulgaris]	731360204	0	1073.59	12	107.1					53.1	167.7	231.7	160.3	280.2	701723					154194	1.07998e+06	1.63649e+06	1.32534e+06	3.96388e+06	1.51465e+06						751747
FALSE		High	Unambiguous	MASGWGISGNKGR	[-].MASGWGISGNKGR.[C]	1xMet-loss+Acetyl [N-Term]	1xMet-loss+Acetyl [N-Term]	4.39971e-05	5.15092e-05	1.341	1	1	4	731322890	731322890 [1-13]	731322890 1xMet-loss+Acetyl [N-Term]	731322890 1xMet-loss+Acetyl [N-Term]	PREDICTED: NADH dehydrogenase [ubiquinone] iron-sulfur protein 5-B [Beta vulgaris subsp. vulgaris]	731322890	1	1231.62	13			6.4			105	175.2	294.9	124.3	294.3			80832.2			1.00178e+06	3.71019e+06	6.8499e+06	3.37921e+06	1.369e+07			295800				4.88402e+06
FALSE		High	Unambiguous	MASGSSSSEMASHIVGYPR	[-].MASGSSSSEMASHIVGYPR.[M]	1xOxidation [M10]; 1xMet-loss+Acetyl [N-Term]	1xOxidation [M10]; 1xMet-loss+Acetyl [N-Term]	5.07807e-06	5.15092e-05	1.626	1	1	19	1108923008	1108923008 [1-19]	1108923008 1xMet-loss+Acetyl [N-Term]	1108923008 1xMet-loss+Acetyl [N-Term]	PREDICTED: 5-methyltetrahydropteroyltriglutamate--homocysteine methyltransferase [Beta vulgaris subsp. vulgaris]	1108923008	0	1880.84	19	25.8	2.4	64	62.8	62.4	36.9	141.1	415.7	52.7	136.2	537058	40774.5	785431	992337	1.70718e+06	339666	2.88231e+06	9.31506e+06	1.38134e+06	6.11403e+06	1.15923e+06	107001	2.87424e+06	2.81958e+06	2.79917e+06		1.65598e+06
FALSE		High	Unambiguous	MASGSSSSEMASHIVGYPR	[-].MASGSSSSEMASHIVGYPR.[M]	1xMet-loss+Acetyl [N-Term]	1xMet-loss+Acetyl [N-Term]	1.81534e-16	5.15092e-05	4.801	1	1	87	1108923008	1108923008 [1-19]	1108923008 1xMet-loss+Acetyl [N-Term]	1108923008 1xMet-loss+Acetyl [N-Term]	PREDICTED: 5-methyltetrahydropteroyltriglutamate--homocysteine methyltransferase [Beta vulgaris subsp. vulgaris]	1108923008	0	1864.85	19	52.5	9.6	101.4	68.4	24.8	48.7	110.6	285.6	104.3	194.3	2.16028e+07	3.24547e+06	2.46065e+07	2.13667e+07	1.34408e+07	8.86278e+06	4.47327e+07	1.26631e+08	5.41017e+07	1.72536e+08	4.66291e+07	8.51682e+06	9.00462e+07	6.07104e+07	2.20381e+07		4.3209e+07
FALSE		High	Unambiguous	MASGGPNLECR	[-].MASGGPNLECR.[M]	1xCarbamidomethyl [C10]; 1xMet-loss+Acetyl [N-Term]	1xCarbamidomethyl [C10]; 1xMet-loss+Acetyl [N-Term]	5.69233e-05	5.15092e-05	1.307	1	1	2	731349289	731349289 [1-11]	731349289 1xMet-loss+Acetyl [N-Term]	731349289 1xMet-loss+Acetyl [N-Term]	PREDICTED: eukaryotic translation initiation factor 2 subunit alpha homolog [Beta vulgaris subsp. vulgaris]	731349289	0	1102.49	11					83.3		383			533.7					515910		1.77162e+06			5.42284e+06					845909
FALSE		High	Unambiguous	MASGDVWHMEKR	[-].MASGDVWHMEKR.[S]	1xMet-loss+Acetyl [N-Term]	1xMet-loss+Acetyl [N-Term]	4.56704e-06	5.15092e-05	1.64	1	1	13	731313530	731313530 [1-12]	731313530 1xMet-loss+Acetyl [N-Term]	731313530 1xMet-loss+Acetyl [N-Term]	PREDICTED: glucose-6-phosphate 1-dehydrogenase, cytoplasmic [Beta vulgaris subsp. vulgaris]	731313530	1	1357.63	12		3.6	22.9	53.2	0.2	266.8	162.8	134.5	138.1	217.8		106909	489469	1.4659e+06	11734.9	4.28119e+06	5.79969e+06	5.25477e+06	6.31287e+06	1.70387e+07		280552	1.79118e+06	4.16513e+06	19241.1		2.08722e+07
FALSE		High	Unambiguous	MASGDVWHMEK	[-].MASGDVWHMEK.[R]	1xMet-loss+Acetyl [N-Term]	1xMet-loss+Acetyl [N-Term]	4.2042e-05	5.15092e-05	1.347	1	1	7	731313530	731313530 [1-11]	731313530 1xMet-loss+Acetyl [N-Term]	731313530 1xMet-loss+Acetyl [N-Term]	PREDICTED: glucose-6-phosphate 1-dehydrogenase, cytoplasmic [Beta vulgaris subsp. vulgaris]	731313530	0	1201.53	11	77.4	70.8	133.1	101.1	29.5	208.1	17.1	90.5	116	156.5	1.44415e+06	1.08568e+06	1.46399e+06	1.43263e+06	724285	1.71884e+06	313058	1.81869e+06	2.72825e+06	6.29972e+06	3.11716e+06	2.84906e+06	5.35738e+06	4.07061e+06	1.18757e+06		8.37993e+06
FALSE		High	Unambiguous	MASFSVYRDSCPIVK	[-].MASFSVYRDSCPIVK.[N]	1xCarbamidomethyl [C11]; 1xMet-loss+Acetyl [N-Term]	1xCarbamidomethyl [C11]; 1xMet-loss+Acetyl [N-Term]	0.000279359	5.15092e-05	1.097	1	1	5	731348171	731348171 [1-15]	731348171 1xMet-loss+Acetyl [N-Term]	731348171 1xMet-loss+Acetyl [N-Term]	PREDICTED: coatomer subunit zeta-2 [Beta vulgaris subsp. vulgaris]	731348171	1	1670.82	15						84.6	239.9	238.3	192.3	244.8						252080	1.58599e+06	1.72756e+06	1.63186e+06	3.55423e+06							1.22897e+06
FALSE		High	Unambiguous	LDLDAPLMSAR	[R].LDLDAPLMSAR.[R]	1xOxidation [M8]; 1xGG [S9]	1xOxidation [M8]; 1xGG [S9]	0.177703	0.00613243	0.219	1	1	2	731331700	731331700 [12-22]			PREDICTED: uncharacterized protein LOC104892534 [Beta vulgaris subsp. vulgaris]	731331700	0	1331.66	11
FALSE		High	Unambiguous	MASGSVIPANR	[-].MASGSVIPANR.[A]	1xMet-loss+Acetyl [N-Term]	1xMet-loss+Acetyl [N-Term]	6.77584e-05	5.15092e-05	1.284	1	1	3	731352226	731352226 [1-11]	731352226 1xMet-loss+Acetyl [N-Term]	731352226 1xMet-loss+Acetyl [N-Term]	PREDICTED: eukaryotic initiation factor 4A-3 [Beta vulgaris subsp. vulgaris]	731352226	0	1013.54	11	8.3		24.8	13.7	18.2	65	226.7	352.5	84	206.8	270125		478553	339517	782247	941347	7.28388e+06	1.24216e+07	3.46361e+06	14595403	583059		1.75124e+06	964688	1.28261e+06		4.58938e+06
FALSE		High	Unambiguous	MASEQAIVKNDYQQEQEKDVK	[-].MASEQAIVKNDYQQEQEKDVK.[K]	1xMet-loss+Acetyl [N-Term]	1xMet-loss+Acetyl [N-Term]	1.96628e-09	5.15092e-05	2.663	2	2	33	731322090; 731322094	731322090 [1-21]; 731322094 [1-21]	731322090 1xMet-loss+Acetyl [N-Term]; 731322094 1xMet-loss+Acetyl [N-Term]	731322090 1xMet-loss+Acetyl [N-Term]; 731322094 1xMet-loss+Acetyl [N-Term]	PREDICTED: jasmonate-induced protein homolog [Beta vulgaris subsp. vulgaris] PREDICTED: jasmonate-induced protein homolog [Beta vulgaris subsp. vulgaris]	731322090; 731322094	2	2392.16	21	6.4	5.5	19.6	17.9	4.5	171.6	267.7	161.4	196.9	148.4	2.37824e+06	1.66628e+06	4.2883e+06	5.04393e+06	2.18901e+06	2.81887e+07	9.76161e+07	6.45518e+07	9.21626e+07	1.18878e+08	5.13336e+06	4.37268e+06	1.56928e+07	1.43316e+07	3.5892e+06		1.37429e+08
FALSE		High	Unambiguous	MASLSVPAALPDVAEDVEQLHK	[-].MASLSVPAALPDVAEDVEQLHK.[A]	1xMet-loss+Acetyl [N-Term]	1xMet-loss+Acetyl [N-Term]	3.31453e-10	5.15092e-05	2.898	1	1	24	731338882	731338882 [1-22]	731338882 1xMet-loss+Acetyl [N-Term]	731338882 1xMet-loss+Acetyl [N-Term]	PREDICTED: annexin D2 [Beta vulgaris subsp. vulgaris]	731338882	0	2231.16	22	28	14.7	1.3	59.5	209.8	46.8	127.3	208.1	106.7	197.9	6.90724e+06	2.9745e+06	185176	1.11302e+07	6.80559e+07	5.10207e+06	3.08371e+07	5.52699e+07	3.31548e+07	105235506	1.49091e+07	7.80573e+06	677642	3.16247e+07	1.11587e+08		2.48743e+07
FALSE		High	Unambiguous	MASNSPNDVPAGAQEPK	[-].MASNSPNDVPAGAQEPK.[S]	1xMet-loss+Acetyl [N-Term]	1xMet-loss+Acetyl [N-Term]	7.35217e-08	5.15092e-05	2.185	1	1	9	731350661	731350661 [1-17]	731350661 1xMet-loss+Acetyl [N-Term]	731350661 1xMet-loss+Acetyl [N-Term]	PREDICTED: ankyrin repeat domain-containing protein 2B [Beta vulgaris subsp. vulgaris]	731350661	0	1623.76	17	51.8	3.1	164.7	78.6	94.3	21.8	85	202.3	118.7	179.7	1.30623e+06	64448.4	2.44863e+06	1.50627e+06	3.13104e+06	242863	2.10512e+06	5495659	3.77557e+06	9780060	2.81946e+06	169126	8.96061e+06	4.27986e+06	5.13379e+06		1.18404e+06
FALSE		High	Unambiguous	SISGGSEICGLTYSAAK	[K].SISGGSEICGLTYSAAK.[R]	1xCarbamidomethyl [C9]; 1xGG [K17]	1xCarbamidomethyl [C9]; 1xGG [K17]	0.179941	0.00616733	0.217	1	1	1	731340832	731340832 [464-480]			PREDICTED: uncharacterized protein LOC104896547 [Beta vulgaris subsp. vulgaris]	731340832	0	1814.86	17
FALSE		High	Unambiguous	MASTKERENFVYIAK	[-].MASTKERENFVYIAK.[L]	1xMet-loss+Acetyl [N-Term]	1xMet-loss+Acetyl [N-Term]	2.15722e-06	5.15092e-05	1.739	1	1	11	731356855	731356855 [1-15]	731356855 1xMet-loss+Acetyl [N-Term]	731356855 1xMet-loss+Acetyl [N-Term]	PREDICTED: 14-3-3-like protein D [Beta vulgaris subsp. vulgaris]	731356855	2	1697.89	15				1.6		203.8	300.7	190.7	93	210.2				102294		7.78707e+06	2.55e+07	1.77301e+07	1.01184e+07	3.9158e+07				290655			3.79645e+07
FALSE		High	Unambiguous	MASTFVGNSTSIQEMFRR	[K].MASTFVGNSTSIQEMFRR.[V]			1.6683e-05	5.15092e-05	1.469	1	1	3	731360530	731360530 [368-385]			PREDICTED: tubulin beta chain [Beta vulgaris subsp. vulgaris]	731360530	1	2061.98	18				16.3		74.7	184.1	298.4	215.1	211.4				158894		424271	2.32269e+06	4.12765e+06	3482366	5858634				451474			2.06846e+06
FALSE		High	Unambiguous	MASTFVGNSTSIQEMFR	[K].MASTFVGNSTSIQEMFR.[R]			1.60348e-08	5.15092e-05	2.386	1	1	5	731360530	731360530 [368-384]			PREDICTED: tubulin beta chain [Beta vulgaris subsp. vulgaris]	731360530	0	1905.88	17					235.7	13.7	214.4	215.4	282.8	38.1					2.24491e+06	43898.4	1524117	1.67925e+06	2.58057e+06	594843					3.68085e+06		214019
FALSE		High	Unambiguous	MASTFIGNSTSIQEMFR	[K].MASTFIGNSTSIQEMFR.[R]			2.17235e-07	5.15092e-05	2.042	1	2	4	731348756	731348756 [363-379]			PREDICTED: tubulin beta-1 chain [Beta vulgaris subsp. vulgaris]	731331094; 731348756	0	1919.9	17		57.1	92.2		215.7	6.7	141.6	87.6	170.8	228.3		284858	329852		1.72114e+06	17967.2	843808	572235	1.30581e+06	2.98762e+06		747529	1.20707e+06		2.82206e+06		87595.9
FALSE		High	Unambiguous	MASTAYPFKIILGSK	[-].MASTAYPFKIILGSK.[S]	1xMet-loss+Acetyl [N-Term]	1xMet-loss+Acetyl [N-Term]	0.000114282	5.15092e-05	1.215	1	4	2	731333512	731333512 [1-15]	731333512 1xMet-loss+Acetyl [N-Term]	731333512 1xMet-loss+Acetyl [N-Term]	PREDICTED: maf-like protein DDB_G0281937 isoform X1 [Beta vulgaris subsp. vulgaris]	731333518; 731333514; 731333516; 731333512	1	1537.86	15		10.1				86.8	354.1	358	138.7	52.3		44721.2				207595	1878881	2.08336e+06	944516	609449		117358					1.01209e+06
FALSE		High	Unambiguous	MASSTRVDLDGNPIKPITICMIGAGGFIGSHLCEK	[-].MASSTRVDLDGNPIKPITICMIGAGGFIGSHLCEK.[L]	2xCarbamidomethyl [C20; C33]; 1xMet-loss+Acetyl [N-Term]	2xCarbamidomethyl [C20; C33]; 1xMet-loss+Acetyl [N-Term]	0.00021923	5.15092e-05	1.129	1	1	2	731357000	731357000 [1-35]	731357000 1xMet-loss+Acetyl [N-Term]	731357000 1xMet-loss+Acetyl [N-Term]	PREDICTED: UDP-D-apiose/UDP-D-xylose synthase 2 [Beta vulgaris subsp. vulgaris]	731357000	1	3656.82	35			36.2					323.6	640.2				54607.7					891793	2.06448e+06				199834
FALSE		High	Unambiguous	MASLSVPAALPDVAEDVEQLHKAFSGWGTNEDLIITILAHR	[-].MASLSVPAALPDVAEDVEQLHKAFSGWGTNEDLIITILAHR.[N]	1xMet-loss+Acetyl [N-Term]	1xMet-loss+Acetyl [N-Term]	6.62358e-05	5.15092e-05	1.287	1	1	5	731338882	731338882 [1-41]	731338882 1xMet-loss+Acetyl [N-Term]	731338882 1xMet-loss+Acetyl [N-Term]	PREDICTED: annexin D2 [Beta vulgaris subsp. vulgaris]	731338882	1	4326.24	41			14.3				455.2	340.8	189.7				170858				9.08999e+06	7.46416e+06	4.86158e+06				625244
FALSE		High	Unambiguous	MASSQAPARKEEAAIHALIK	[-].MASSQAPARKEEAAIHALIK.[Q]	1xMet-loss+Acetyl [N-Term]	1xMet-loss+Acetyl [N-Term]	0.000217575	5.15092e-05	1.13	1	1	9	731316634	731316634 [1-20]	731316634 1xMet-loss+Acetyl [N-Term]	731316634 1xMet-loss+Acetyl [N-Term]	PREDICTED: uncharacterized protein LOC104908856 [Beta vulgaris subsp. vulgaris]	731316634	2	2033.11	20	3.6		20	5.2		185	81.7	147.3	73.3	484	114448		376001	125097		2.6101e+06	2560242	5.05928e+06	2.94514e+06	3.32928e+07	247033		1.37595e+06	355444			1.27251e+07
FALSE		High	Unambiguous	MASSAREESVYMAK	[-].MASSAREESVYMAK.[L]	1xOxidation [M12]; 1xMet-loss+Acetyl [N-Term]	1xOxidation [M12]; 1xMet-loss+Acetyl [N-Term]	6.42588e-05	5.15092e-05	1.291	1	1	3	731312715	731312715 [1-14]	731312715 1xMet-loss+Acetyl [N-Term]	731312715 1xMet-loss+Acetyl [N-Term]	PREDICTED: 14-3-3-like protein [Beta vulgaris subsp. vulgaris]	731312715	1	1486.68	14	88.6	41.7	193.5	96.5	49.1	40.6	85.8	197.7	85.4	121.1	733586	283885	945324	607236	535624	148728	698043	1.76471e+06	892266	2165663	1.58343e+06	744974	3.45935e+06	1.72537e+06	878232		725098
FALSE		High	Unambiguous	MASSAREESVYMAK	[-].MASSAREESVYMAK.[L]	1xMet-loss+Acetyl [N-Term]	1xMet-loss+Acetyl [N-Term]	3.19695e-07	5.15092e-05	1.991	1	1	22	731312715	731312715 [1-14]	731312715 1xMet-loss+Acetyl [N-Term]	731312715 1xMet-loss+Acetyl [N-Term]	PREDICTED: 14-3-3-like protein [Beta vulgaris subsp. vulgaris]	731312715	1	1470.69	14	5.9	1.5	39.8	32.8	7.2	74.4	142.1	268.3	175.1	252.9	1.56247e+06	320454	6.2371e+06	6.62542e+06	2.52635e+06	8.74334e+06	3.70932e+07	7.6781e+07	5.86479e+07	1.44932e+08	3.37256e+06	840940	2.28243e+07	1.88252e+07	4.14232e+06		4.26267e+07
FALSE		High	Unambiguous	MASSAAAMKELQHELENKANDLR	[-].MASSAAAMKELQHELENKANDLR.[K]	1xMet-loss+Acetyl [N-Term]	1xMet-loss+Acetyl [N-Term]	1.35968e-05	5.15092e-05	1.496	1	1	2	731370748	731370748 [1-23]	731370748 1xMet-loss+Acetyl [N-Term]	731370748 1xMet-loss+Acetyl [N-Term]	PREDICTED: prefoldin subunit 6 [Beta vulgaris subsp. vulgaris]	731370748	2	2468.22	23		14.3		39.7			339.9	191.6	377.1	37.4		53064.9		135713			1.50381e+06	929364	2.14097e+06	363218		139254		385608
FALSE		High	Unambiguous	MASSAAAMKELQHELENK	[-].MASSAAAMKELQHELENK.[A]	1xMet-loss+Acetyl [N-Term]	1xMet-loss+Acetyl [N-Term]	1.43207e-07	5.15092e-05	2.097	1	1	2	731370748	731370748 [1-18]	731370748 1xMet-loss+Acetyl [N-Term]	731370748 1xMet-loss+Acetyl [N-Term]	PREDICTED: prefoldin subunit 6 [Beta vulgaris subsp. vulgaris]	731370748	1	1898.93	18							199.7		268.4	532							643545		1109967	3.76561e+06
FALSE		High	Unambiguous	MASRYEVEVTLSSAKDLK	[-].MASRYEVEVTLSSAKDLK.[N]	1xMet-loss+Acetyl [N-Term]	1xMet-loss+Acetyl [N-Term]	0.000225973	5.15092e-05	1.125	1	1	3	731322008	731322008 [1-18]	731322008 1xMet-loss+Acetyl [N-Term]	731322008 1xMet-loss+Acetyl [N-Term]	PREDICTED: uncharacterized protein LOC104888395 [Beta vulgaris subsp. vulgaris]	731322008	2	1938.02	18							472.1	151.9	160.5	215.5							2.64731e+06	934127	1.15478e+06	2.65489e+06
FALSE		High	Unambiguous	MASQPMNNARPPTVQIR	[R].MASQPMNNARPPTVQIR.[G]			0.00148854	5.15092e-05	0.876	1	1	5	731360831	731360831 [173-189]			PREDICTED: ras-related protein RABD2a [Beta vulgaris subsp. vulgaris]	731360831	0	1910.97	17	16.7			81.9		26.6	413.3	223.8	204.7	33.1	84544.9			315179		59628.5	2.05729e+06	1.22209e+06	1.30776e+06	361476	182488			895534			290709
FALSE		High	Unambiguous	MASPSQASLLLQK	[-].MASPSQASLLLQK.[Q]	1xMet-loss+Acetyl [N-Term]	1xMet-loss+Acetyl [N-Term]	0.000135006	5.15092e-05	1.193	1	1	3	731349052	731349052 [1-13]	731349052 1xMet-loss+Acetyl [N-Term]	731349052 1xMet-loss+Acetyl [N-Term]	PREDICTED: ubiquitin-conjugating enzyme E2 7 [Beta vulgaris subsp. vulgaris]	731349052	0	1284.72	13	38		126.8	123		35.4	107.6	294.1	13.9	261.2	654026		1.28711e+06	1.60737e+06		269318	1.819e+06	5.45435e+06	300737	9.70179e+06	1.4117e+06		4.7101e+06	4.56711e+06			1.31302e+06
FALSE		High	Unambiguous	MASSGKDSGFEEEEASHIAEELEK	[-].MASSGKDSGFEEEEASHIAEELEK.[S]	1xMet-loss+Acetyl [N-Term]	1xMet-loss+Acetyl [N-Term]	5.43323e-07	5.15092e-05	1.921	1	1	2	731325193	731325193 [1-24]	731325193 1xMet-loss+Acetyl [N-Term]	731325193 1xMet-loss+Acetyl [N-Term]	PREDICTED: partner of Y14 and mago [Beta vulgaris subsp. vulgaris]	731325193	1	2521.12	24				19.2			199.3	259.3	163.6	358.5				47997.7			643019	917219	677394	2540501				136378
FALSE		High	Unambiguous	MASEQAIVKNDYQQEQEK	[-].MASEQAIVKNDYQQEQEK.[D]	1xMet-loss+Acetyl [N-Term]	1xMet-loss+Acetyl [N-Term]	8.76194e-06	5.15092e-05	1.554	2	2	1	731322090; 731322094	731322090 [1-18]; 731322094 [1-18]	731322090 1xMet-loss+Acetyl [N-Term]; 731322094 1xMet-loss+Acetyl [N-Term]	731322090 1xMet-loss+Acetyl [N-Term]; 731322094 1xMet-loss+Acetyl [N-Term]	PREDICTED: jasmonate-induced protein homolog [Beta vulgaris subsp. vulgaris] PREDICTED: jasmonate-induced protein homolog [Beta vulgaris subsp. vulgaris]	731322090; 731322094	1	2049.97	18						90.2		164.1	197.4	548.3						81886.3		362623	510278	2.42626e+06							399223
FALSE		High	Unambiguous	MASEQAIVK	[-].MASEQAIVK.[N]	1xMet-loss+Acetyl [N-Term]	1xMet-loss+Acetyl [N-Term]	0.000577962	5.15092e-05	1.001	2	2	6	731322090; 731322094	731322090 [1-9]; 731322094 [1-9]	731322090 1xMet-loss+Acetyl [N-Term]; 731322094 1xMet-loss+Acetyl [N-Term]	731322090 1xMet-loss+Acetyl [N-Term]; 731322094 1xMet-loss+Acetyl [N-Term]	PREDICTED: jasmonate-induced protein homolog [Beta vulgaris subsp. vulgaris] PREDICTED: jasmonate-induced protein homolog [Beta vulgaris subsp. vulgaris]	731322090; 731322094	0	887.483	9	33.5		132.3	85.2	140.2	29.7	65.5	141.4	160.6	211.6	1.2836e+06		2985976	2.47705e+06	7.06309e+06	503580	2.46155e+06	5.83078e+06	7752357	17474834	2.77062e+06		1.0927e+07	7.03818e+06	1.15809e+07		2.45512e+06
FALSE		High	Unambiguous	MASENFTDKNAIFRK	[-].MASENFTDKNAIFRK.[L]	1xMet-loss+Acetyl [N-Term]	1xMet-loss+Acetyl [N-Term]	1.59324e-06	5.15092e-05	1.779	1	1	6	731332489	731332489 [1-15]	731332489 1xMet-loss+Acetyl [N-Term]	731332489 1xMet-loss+Acetyl [N-Term]	PREDICTED: probable ADP-ribosylation factor GTPase-activating protein AGD9 [Beta vulgaris subsp. vulgaris]	731332489	2	1682.85	15						128.2	105.7	322.3	130.9	312.8						542760	993695	3.3222e+06	1.57913e+06	6.45742e+06							2.64613e+06
FALSE		High	Unambiguous	MAQFNIKDDDVDIVIGALQSDLTSFMNAWKPIFSR	[-].MAQFNIKDDDVDIVIGALQSDLTSFMNAWKPIFSR.[F]	1xMet-loss+Acetyl [N-Term]	1xMet-loss+Acetyl [N-Term]	1.57473e-13	5.15092e-05	3.908	1	1	5	731327761	731327761 [1-35]	731327761 1xMet-loss+Acetyl [N-Term]	731327761 1xMet-loss+Acetyl [N-Term]	PREDICTED: probable UDP-arabinopyranose mutase 5 [Beta vulgaris subsp. vulgaris]	731327761	1	3896.95	35	45.8	24.4	409.2	65.7	298.8	47	33.1		76		625934	274163	3.2956e+06	681166	5.37093e+06	284244	443722		1.30877e+06		1.35106e+06	719464	1.206e+07	1.93543e+06	8.8064e+06		1.38579e+06
FALSE		High	Unambiguous	MAQDSSISIDNPK	[-].MAQDSSISIDNPK.[S]	1xMet-loss+Acetyl [N-Term]	1xMet-loss+Acetyl [N-Term]	2.62689e-06	5.15092e-05	1.713	1	2	4	731362354	731362354 [1-13]	731362354 1xMet-loss+Acetyl [N-Term]	731362354 1xMet-loss+Acetyl [N-Term]	PREDICTED: 4-coumarate--CoA ligase-like 5 isoform X1 [Beta vulgaris subsp. vulgaris]	731362354; 1108785549	0	1316.63	13	30.8		167.8	461.8	60.5	20.8	58.5	70.8	49.7	79.3	331684		1.06678e+06	3.78153e+06	858943	99361.4	619255	822902	676212	1.84526e+06	715933		3.90381e+06	1.07446e+07	1.40836e+06		484419
FALSE		High	Unambiguous	MAQAQQAIVNNDKNQMRNNAFIDMSNTTR	[-].MAQAQQAIVNNDKNQMRNNAFIDMSNTTR.[A]	1xMet-loss+Acetyl [N-Term]	1xMet-loss+Acetyl [N-Term]	0.000618719	5.15092e-05	0.992	1	1	2	731312253	731312253 [1-29]	731312253 1xMet-loss+Acetyl [N-Term]	731312253 1xMet-loss+Acetyl [N-Term]	PREDICTED: jasmonate-induced protein homolog [Beta vulgaris subsp. vulgaris]	731312253	2	3235.53	29						31.8	178.1	606	17.5	166.7						78142.8	972567	3630255	122543	1.99955e+06							380972
FALSE		High	Unambiguous	KCFSQLTLEDGR	[R].KCFSQLTLEDGR.[D]	1xCarbamidomethyl [C2]; 1xGG [S4]	1xCarbamidomethyl [C2]; 1xGG [S4]	0.182201	0.00628377	0.215	1	1	1	731327604	731327604 [475-486]			PREDICTED: increased DNA methylation 1 [Beta vulgaris subsp. vulgaris]	731327604	1	1567.75	12
FALSE		High	Unambiguous	MAQAQQAIVNNDKNQMR	[-].MAQAQQAIVNNDKNQMR.[N]	1xMet-loss+Acetyl [N-Term]	1xMet-loss+Acetyl [N-Term]	2.74422e-09	5.15092e-05	2.619	1	1	8	731312253	731312253 [1-17]	731312253 1xMet-loss+Acetyl [N-Term]	731312253 1xMet-loss+Acetyl [N-Term]	PREDICTED: jasmonate-induced protein homolog [Beta vulgaris subsp. vulgaris]	731312253	1	1870.92	17			8.4	15.5	9.9	44.9	185.2	266.1	237.7	232.4			137658	328524	363690	553966	5.07594e+06	7.99764e+06	8.36009e+06	1.39922e+07			503749	933451	596321		2.70077e+06
FALSE		High	Unambiguous	LGKIVTPLPPK	[K].LGKIVTPLPPK.[E]	1xPhospho [T6]; 1xGG [K3]	1xPhospho [T6]; 1xGG [K3]	0.182201	0.00628377	0.215	1	2	1	731310858	731310858 [252-262]	731310858 1xPhospho [T257]	731310858 1xPhospho [T257]	PREDICTED: putative CCA tRNA nucleotidyltransferase 2 isoform X1 [Beta vulgaris subsp. vulgaris]	731310860; 731310858	1	1356.77	11
FALSE		High	Unambiguous	MAQAIAKNQIVAK	[-].MAQAIAKNQIVAK.[Y]	1xMet-loss+Acetyl [N-Term]	1xMet-loss+Acetyl [N-Term]	3.893e-07	5.15092e-05	1.965	5	9	14	731337638; 731337636; 731337645; 731330705; 731319400	731337638 [1-13]; 731337636 [1-13]; 731337645 [1-13]; 731330705 [1-13]; 731319400 [1-13]	731337638 1xMet-loss+Acetyl [N-Term]; 731337636 1xMet-loss+Acetyl [N-Term]; 731337645 1xMet-loss+Acetyl [N-Term]; 731330705 1xMet-loss+Acetyl [N-Term]; 731319400 1xMet-loss+Acetyl [N-Term]	731337638 1xMet-loss+Acetyl [N-Term]; 731337636 1xMet-loss+Acetyl [N-Term]; 731337645 1xMet-loss+Acetyl [N-Term]; 731330705 1xMet-loss+Acetyl [N-Term]; 731319400 1xMet-loss+Acetyl [N-Term]	PREDICTED: mannose/glucose-specific lectin isoform X1 [Beta vulgaris subsp. vulgaris] PREDICTED: mannose/glucose-specific lectin [Beta vulgaris subsp. vulgaris] PREDICTED: mannose/glucose-specific lectin [Beta vulgaris subsp. vulgaris] PREDICTED: mannose/glucose-specific lectin [Beta vulgaris subsp. vulgaris] PREDICTED: mannose/glucose-specific lectin [Beta vulgaris subsp. vulgaris]	731337638; 731337636; 731337645; 731337642; 731330705; 731337649; 731319396; 731319400; 731319398	1	1296.76	13						41.5	199.1	493.2	65.1	201.1						2.75382e+06	2.93535e+07	7.97361e+07	1.23151e+07	6.5102e+07							1.34258e+07
FALSE		High	Unambiguous	MAQGAKPGEGGELPGHK	[K].MAQGAKPGEGGELPGHK.[V]			0.000153561	5.15092e-05	1.176	1	3	5	731321657	731321657 [1090-1106]			PREDICTED: glutamate synthase 1 [NADH], chloroplastic isoform X1 [Beta vulgaris subsp. vulgaris]	731321663; 731321657; 731321661	0	1663.82	17	279.4		331.1	358.4				31.2			1.57892e+06		1.10369e+06	1.5387e+06				190089			3.40805e+06		4.03891e+06	4.37199e+06
FALSE		High	Unambiguous	MAPVPNSESINPKDVCIVGVAR	[-].MAPVPNSESINPKDVCIVGVAR.[T]	1xCarbamidomethyl [C16]; 1xMet-loss [N-Term]	1xCarbamidomethyl [C16]; 1xMet-loss [N-Term]	3.02826e-09	5.15092e-05	2.606	1	1	5	1108976536	1108976536 [1-22]	1108976536 1xMet-loss [N-Term]	1108976536 1xMet-loss [N-Term]	PREDICTED: acetyl-CoA acetyltransferase, cytosolic 1 [Beta vulgaris subsp. vulgaris]	1108976536	1	2222.16	22			155.2			141.5	6.3	347.1	129.7	220.2			1.2818e+06			877316	87149.3	5.23888e+06	2.28991e+06	6.6565e+06			4.69068e+06				4.27721e+06
FALSE		High	Unambiguous	MAPPLLFEDIFNIIR	[-].MAPPLLFEDIFNIIR.[V]	1xMet-loss [N-Term]	1xMet-loss [N-Term]	3.19882e-06	5.15092e-05	1.687	1	1	14	731325404	731325404 [1-15]	731325404 1xMet-loss [N-Term]	731325404 1xMet-loss [N-Term]	PREDICTED: DNA-directed RNA polymerases II, IV and V subunit 8B [Beta vulgaris subsp. vulgaris]	731325404	0	1657.93	15	141.8	98.6	113.4	251.9	137.8	27	45.2	51.7	107.7	24.9	1.11883e+07	6.40187e+06	5.27898e+06	1.51058e+07	1.43162e+07	945037	3.50483e+06	4394790	1.07191e+07	4.24973e+06	2.41496e+07	1.67999e+07	1.93181e+07	4.29208e+07	2.34735e+07		4.60737e+06
FALSE		High	Unambiguous	MAPLAVGDVIPDGNLKYFDENNQSQDVSIHSLSAGK	[-].MAPLAVGDVIPDGNLKYFDENNQSQDVSIHSLSAGK.[I]	1xMet-loss [N-Term]	1xMet-loss [N-Term]	4.62862e-09	5.15092e-05	2.55	1	1	4	731359618	731359618 [1-36]	731359618 1xMet-loss [N-Term]	731359618 1xMet-loss [N-Term]	PREDICTED: peroxiredoxin-2B [Beta vulgaris subsp. vulgaris]	731359618	1	3698.83	36			2.2		11.5	34.7		335.7	223	393			31285.2		367663	373343		8794537	6.83656e+06	20619997			114486		602836		1.82017e+06
FALSE		High	Unambiguous	MAPLAVGDVIPDGNLK	[-].MAPLAVGDVIPDGNLK.[Y]	1xMet-loss [N-Term]	1xMet-loss [N-Term]	1.21999e-09	5.15092e-05	2.726	1	1	28	731359618	731359618 [1-16]	731359618 1xMet-loss [N-Term]	731359618 1xMet-loss [N-Term]	PREDICTED: peroxiredoxin-2B [Beta vulgaris subsp. vulgaris]	731359618	0	1478.82	16	30.3	25.8	31.3	109.2	34.6	38.8	151.5	214.6	167.3	196.6	6.71341e+06	4.70332e+06	4.08164e+06	1.83617e+07	10084227	3.79992e+06	3.29654e+07	5.12064e+07	4.67049e+07	9.39541e+07	1.44907e+07	1.23425e+07	1.49365e+07	5.21721e+07	1.65345e+07		1.85259e+07
FALSE		High	Unambiguous	MAPKQPNTGLFVGLNR	[-].MAPKQPNTGLFVGLNR.[G]	1xMet-loss [N-Term]	1xMet-loss [N-Term]	1.26932e-06	5.15092e-05	1.809	1	2	37	731316698	731316698 [1-16]	731316698 1xMet-loss [N-Term]	731316698 1xMet-loss [N-Term]	PREDICTED: 60S ribosomal protein L36-2 [Beta vulgaris subsp. vulgaris]	731316698; 1108898186	1	1611.9	16				7.5	1.6	120.1	187.4	136.8	230.5	316.1				305753	115311	2.86824e+06	9.92963e+06	7.94998e+06	1.56747e+07	3.67886e+07				868751	189069		1.39836e+07
[truncated: 24,372 more rows]
[truncated: 106 more columns]
